# Supplementary material for: Testing the Two-Step Model of Plant Root Microbiome Acquisition Under Multiple Plant Species and Soil Sources
Source: Front Microbiol. 2020 Oct 9;11:542742. doi: 10.3389/fmicb.2020.542742 (PMC7581803; doi:10.3389/fmicb.2020.542742)
Supplement: Supplementary file 2 [file Table_1.XLSX]

## Sheet: Sheet1
Sample	Number of raw paired end sequences	Assembled sequences	% assembled sequences
JAL1SI	29540	16470	55.7549
JAL2SI	37305	22002	58.9787
JAL3SI	48206	25377	52.6428
JAL4SI	34685	21629	62.3584
JAL5SI	42616	27118	63.6334
NAY2SI	40847	23278	56.9883
NAY3SI	46253	28432	61.4706
GTO1SI	38483	22203	57.6956
GTO2SI	36243	22283	61.4822
GTO3SI	40262	23212	57.6524
SIN1SI	38863	21325	54.8722
SIN2SI	41873	24503	58.5174
SLP1SI	43755	26511	60.5896
AGS1SI	53477	31962	59.7678
DGO1SI	46420	24435	52.6389
ZAC1SI	37506	22749	60.6543
JAL1FS	61002	38784	63.5782
JAL2FS	39450	23937	60.6768
JAL3FS	55096	34348	62.3421
JAL4FS	51074	31181	61.0506
JAL5FS	38642	24033	62.194
NAY2FS	49599	29182	58.8359
NAY3FS	37856	21873	57.7795
GTO1FS	52509	31358	59.7193
GTO2FS	45535	26468	58.1267
GTO3FS	68187	39456	57.8644
SIN1FS	54285	26876	49.5091
SIN2FS	35628	21357	59.9444
SLP1FS	110388	67944	61.5502
DGO1FS	54505	34294	62.919
ZAC1FS	49597	29115	58.7031
JAL1US	68769	43786	63.6711
JAL2US	48176	28749	59.6749
JAL3US	69380	42936	61.8853
JAL4US	47839	28898	60.4068
JAL5US	50768	31097	61.2532
NAY2US	61449	34719	56.5005
NAY3US	60418	34356	56.8638
GTO1US	57065	33590	58.8627
GTO2US	41089	23142	56.3216
GTO3US	70553	40843	57.8898
SIN1US	45987	22656	49.2661
SIN2US	45082	28318	62.8144
SLP1US	49588	32489	65.5179
AGS1US	42550	26105	61.3514
DGO1US	48088	30942	64.3445
ZAC1US	43535	26653	61.222
JAL1RT	53552	32456	60.6065
JAL2RT	59202	33997	57.4254
JAL3RT	48846	28531	58.4101
JAL4RT	35552	21538	60.5817
JAL5RT	50893	29392	57.7525
NAY2RT	55583	31877	57.3503
NAY3RT	47047	23393	49.7226
GTO1RT	50312	31743	63.0923
GTO2RT	33492	21232	63.3942
GTO3RT	43804	26311	60.0653
SIN1RT	46312	27498	59.3755
SIN2RT	42911	26063	60.7373
SLP1RT	52939	32598	61.5765
AGS1RT	49540	29108	58.7566
DGO1RT	44502	26030	58.4918
ZAC1RT	53403	31833	59.609
JAL1ECT	58825	34512	58.6689
JAL2ECT	51453	30257	58.8051
JAL3ECT	49092	26124	53.2144
JAL4ECT	43437	29078	66.9429
JAL5ECT	50808	32060	63.1003
NAY2ECT	35031	22226	63.4467
NAY3ECT	66373	43728	65.8822
GTO1ECT	44331	24532	55.3383
GTO2ECT	49010	30196	61.6119
GTO3ECT	52497	30695	58.47
SIN1ECT	36712	20771	56.5782
SIN2ECT	49785	31462	63.1957
SLP1ECT	54179	32459	59.9107
AGS1ECT	58458	35041	59.9422
DGO1ECT	44331	22905	51.6681
ZAC1ECT	47597	30856	64.8276
JAL1RZ	131274	94602	72.0645
JAL2RZ	152845	112494	73.6001
JAL3RZ	140880	101692	72.1834
JAL4RZ	166513	117881	70.7939
JAL5RZ	111882	82750	73.9619
NAY2RZ	125850	84601	67.2237
NAY3RZ	142178	98317	69.1506
SIN1RZ	66557	35578	53.4549
SIN2RZ	143645	98931	68.8719
DGO1RZ	206045	47181	22.8984
ZAC1RZ	140297	104396	74.4107
SLP1RZ	138123	101730	73.6517
GTO1RZ	75080	54186	72.171
GTO2RZ	106873	77077	72.1202
GTO3RZ	130734	99551	76.1478
JAL1EC	192280	138023	71.7823
JAL2EC	269580	205345	76.1722
JAL3EC	204928	146474	71.4758
JAL5EC	200861	147336	73.3522
NAY2EC	173362	123161	71.0427
SIN1EC	255854	180981	70.736
SIN2EC	92313	66704	72.2585
AGS1EC	172290	122957	71.3663
SLP1EC	159123	117028	73.5456
GTO1EC	89177	65522	73.4741
GTO2EC	144258	106608	73.9009
GTO3EC	232991	177262	76.0811

## Sheet: Sheet2
JAL1RZ	262548	94602	36.03
JAL1EC	384560	138023	35.89
JAL2RZ	305690	112494	36.8
JAL2EC	539160	205345	38.08
JAL3RZ	281760	101692	36.09
JAL3EC	409856	146474	35.73
JAL4RZ	333026	117881	35.39
JAL5RZ	223764	82750	36.98
JAL5EC	401722	147336	36.67
NAY2RZ	251700	84601	33.61
NAY2EC	346724	123161	35.52
NAY3RZ	284356	98317	34.57
SIN1RZ	133114	35578	26.72
SIN1EC	511708	180981	35.36
SIN2RZ	287290	98931	34.43
SIN2EC	184626	66704	36.12
DGO1RZ	412090	47181	11.44
ZAC1RZ	280594	104396	37.2
AGS1EC	344580	122957	35.68
SLP1RZ	276246	101730	36.82
SLP1EC	318246	117028	36.77
GTO1RZ	150160	54186	36.08
GTO1EC	178354	65522	36.73
GTO2RZ	213746	77077	36.06
GTO2EC	288516	106608	36.95
GTO3RZ	261468	99551	38.07
GTO3EC	465982	177262	38.04
