# Supplementary material for: Testing the Two-Step Model of Plant Root Microbiome Acquisition Under Multiple Plant Species and Soil Sources
Source: Front Microbiol. 2020 Oct 9;11:542742. doi: 10.3389/fmicb.2020.542742 (PMC7581803; doi:10.3389/fmicb.2020.542742)
Supplement: Supplementary file 4 [file Table_3.XLSX]

## Sheet: Soil unique
OTU ID	Kingdom	Phylum	Class	Order	Famiy	Genus	Species
2068147	Bacteria	Acidobacteria	BPC102
1487480	Bacteria	Bacteroidetes	Cytophagia	Cytophagales	Cyclobacteriaceae	Algoriphagus	terrigena
2066607	Bacteria	Chloroflexi	Dehalococcoidetes
2054572	Bacteria	Firmicutes	Clostridia	Clostridiales	Sulfobacillaceae	YNPFFP6
2054614	Bacteria	Firmicutes	Clostridia	Clostridiales	Sulfobacillaceae
931407	Bacteria	Firmicutes	Clostridia	Clostridiales	Veillonellaceae	Veillonella	dispar
1762120	Bacteria	Nitrospirae	Nitrospira	Nitrospirales	Nitrospiraceae	JG37-AG-70
2559110	Bacteria	Planctomycetes	Phycisphaerae	SHUX583

## Sheet: Ruederal plants unique
OTU ID	Kingdom	Phylum	Class	Order	Famiy	Genus	Species
318494	Bacteria	Acidobacteria	Chloracidobacteria	Ellin7246
1507871	Bacteria	Acidobacteria	Solibacteres	Solibacterales	PK34
1628890	Bacteria	Acidobacteria	Acidobacteriia	Acidobacteriales	Acidobacteriaceae	Telmatobacter	bradus
28255	Bacteria	Acidobacteria	iii1-8	SJA-36
1629280	Bacteria	Acidobacteria	Acidobacteriia	Acidobacteriales	Acidobacteriaceae	Acidicapsa	borealis
1506651	Bacteria	Acidobacteria	Solibacteres	Solibacterales	PAUC26f
349528	Bacteria	Acidobacteria	TM1
69961	Bacteria	Acidobacteria	AT-s54
1161306	Bacteria	Actinobacteria	Actinobacteria	Actinomycetales	Microbacteriaceae	Agrococcus	jenensis
496163	Bacteria	Actinobacteria	Actinobacteria	Actinomycetales	Microbacteriaceae	Subtercola	boreus
528843	Bacteria	Actinobacteria	Actinobacteria	Actinomycetales	Microbacteriaceae	Mycetocola
1158034	Bacteria	Actinobacteria	Actinobacteria	Actinomycetales	Tsukamurellaceae	Gordonia	kroppenstedtii
1525952	Bacteria	Actinobacteria	Actinobacteria	Actinomycetales	Nocardioidaceae	Propionicimonas
209313	Bacteria	Actinobacteria	Actinobacteria	Actinomycetales	Kineosporiaceae	Quadrisphaera	granulorum
1645788	Bacteria	Actinobacteria	Actinobacteria	Actinomycetales	Actinopolysporaceae	Actinopolyspora
540971	Bacteria	Actinobacteria	Actinobacteria	Actinomycetales	Pseudonocardiaceae	Thermocrispum	agreste
116397	Bacteria	Actinobacteria	Actinobacteria	Actinomycetales	Nocardiaceae	Skermania	piniformis
1522845	Bacteria	Actinobacteria	Actinobacteria	Actinomycetales	Microbacteriaceae	Curtobacterium
1266549	Bacteria	Actinobacteria	Actinobacteria	Actinomycetales	Pseudonocardiaceae	Thermobispora	bispora
444045	Bacteria	Actinobacteria	Actinobacteria	Actinomycetales	Dermacoccaceae	Dermacoccus
129431	Bacteria	Actinobacteria	Actinobacteria	Actinomycetales	Actinosynnemataceae	Saccharothrixopsis	albidus
941453	Bacteria	Actinobacteria	Acidimicrobiia	Acidimicrobiales	ntu14
538513	Bacteria	Actinobacteria	Actinobacteria	Actinomycetales	Beutenbergiaceae	Salana	multivorans
514025	Bacteria	Actinobacteria	Actinobacteria	Actinomycetales	Microbacteriaceae	Rathayibacter	caricis
486876	Bacteria	Actinobacteria	Actinobacteria	Bifidobacteriales
694985	Bacteria	Actinobacteria	Actinobacteria	Actinomycetales	Beutenbergiaceae	Beutenbergia	cavernae
1174260	Bacteria	Actinobacteria	Acidimicrobiia	Acidimicrobiales	koll13
102235	Bacteria	Actinobacteria	Actinobacteria	Actinomycetales	Micrococcaceae	Acaricomes	phytoseiuli
306780	Bacteria	Actinobacteria	Actinobacteria	Actinomycetales	Corynebacteriaceae	Corynebacterium
498274	Bacteria	Actinobacteria	Actinobacteria	Actinomycetales	Ruaniaceae
441906	Bacteria	Actinobacteria	Actinobacteria	Actinomycetales	Nocardiopsaceae
693116	Bacteria	Actinobacteria	Actinobacteria	Actinomycetales	Micromonosporaceae	Longispora	fulva
506558	Bacteria	Actinobacteria	Actinobacteria	Actinomycetales	Pseudonocardiaceae	Sciscionella	marina
1154867	Bacteria	Actinobacteria	Actinobacteria	Actinomycetales	Intrasporangiaceae	Lapillicoccus	jejuensis
1130805	Bacteria	Actinobacteria	Actinobacteria	Actinomycetales	Microbacteriaceae	Candidatus_Aquiluna	rubra
941916	Bacteria	Actinobacteria	Actinobacteria	Actinomycetales	Micrococcaceae	Citricoccus
473294	Bacteria	Actinobacteria	Actinobacteria	Actinomycetales	Micrococcaceae	Renibacterium
414553	Bacteria	Actinobacteria	Actinobacteria	Actinomycetales	Cellulomonadaceae
104883	Bacteria	Actinobacteria	Thermoleophilia
692103	Bacteria	Actinobacteria	Actinobacteria	Actinomycetales	Intrasporangiaceae	Marihabitans	asiaticum
1159354	Bacteria	Actinobacteria	Actinobacteria	Actinomycetales	Nocardiaceae	Smaragdicoccus	niigatensis
1236031	Bacteria	Actinobacteria	Actinobacteria	Actinomycetales	Dermatophilaceae	Dermatophilus
1170293	Bacteria	Actinobacteria	Actinobacteria	Actinomycetales	Intrasporangiaceae	Janibacter
1263184	Bacteria	Actinobacteria	Actinobacteria	Actinomycetales	Streptosporangiaceae	Microbispora	mesophila
529322	Bacteria	Actinobacteria	Actinobacteria	Actinomycetales	Dermabacteraceae	Brachybacterium
487400	Bacteria	Actinobacteria	Acidimicrobiia	Acidimicrobiales	TK06
692116	Bacteria	Actinobacteria	Actinobacteria	Actinomycetales	Pseudonocardiaceae	Jiangella
1156838	Bacteria	Actinobacteria	Actinobacteria	Actinomycetales	Dietziaceae	Dietzia
1684632	Bacteria	Actinobacteria	Actinobacteria	Actinomycetales	Intrasporangiaceae	Kytococcus
1164649	Bacteria	Actinobacteria	Actinobacteria	Actinomycetales	Micrococcaceae	Rothia	amarae
1243320	Bacteria	Actinobacteria	Actinobacteria	Actinomycetales	Nocardiaceae	Segniliparus	rotundus
93425	Bacteria	Actinobacteria	Actinobacteria	Actinomycetales	Microbacteriaceae	Cryobacterium	psychrophilum
383756	Bacteria	Actinobacteria	Actinobacteria	Actinomycetales	Microbacteriaceae	Frondihabitans	cladoniiphilus
1446824	Bacteria	Actinobacteria	Coriobacteriia	Coriobacteriales	Coriobacteriaceae	Collinsella
938628	Bacteria	Actinobacteria	Actinobacteria	Actinomycetales	Microbacteriaceae	Candidatus_Rhodoluna
1253292	Bacteria	Actinobacteria	Nitriliruptoria	Nitriliruptorales	Nitriliruptoraceae
1248989	Bacteria	Actinobacteria	Actinobacteria	Actinomycetales	Streptosporangiaceae	Microtetraspora	malaysiensis
692789	Bacteria	Actinobacteria	Actinobacteria	Actinomycetales	Beutenbergiaceae	Serinibacter	salmoneus
1252338	Bacteria	Actinobacteria	Actinobacteria	Actinomycetales	Microbacteriaceae	Schumannella	luteola
1158040	Bacteria	Actinobacteria	Actinobacteria	Actinomycetales	Dermabacteraceae	Devriesea	agamarum
1150472	Bacteria	Actinobacteria	Actinobacteria	Actinomycetales	Micrococcaceae	Nesterenkonia
1140022	Bacteria	Actinobacteria	Actinobacteria	Actinomycetales	Jonesiaceae
486780	Bacteria	Actinobacteria	Actinobacteria	Actinomycetales	Intrasporangiaceae	Serinicoccus
1426368	Bacteria	Actinobacteria	Actinobacteria	Actinomycetales	Nocardiopsaceae	Marinactinospora	thermotolerans
1515677	Bacteria	Actinobacteria	Actinobacteria	Actinomycetales	Microbacteriaceae	Leifsonia	antarctica
17662	Bacteria	Actinobacteria	Actinobacteria	Actinomycetales	Pseudonocardiaceae	Saccharopolyspora
1256505	Bacteria	Actinobacteria	Actinobacteria	Actinomycetales	Streptomycetaceae	Kitasatospora
1130890	Bacteria	Actinobacteria	Actinobacteria	Actinomycetales	Microbacteriaceae	Herbiconiux	ginsengi
1695510	Bacteria	Actinobacteria	Coriobacteriia	Coriobacteriales	Coriobacteriaceae
1143296	Bacteria	Actinobacteria	Actinobacteria	Actinomycetales	Cellulomonadaceae	Sediminihabitans	luteus
29536	Bacteria	Actinobacteria	Actinobacteria	Actinomycetales	Microbacteriaceae	Glaciibacter	superstes
1150341	Bacteria	Actinobacteria	Actinobacteria	Actinomycetales	Dermatophilaceae	Piscicoccus	intestinalis
944439	Bacteria	Actinobacteria	Actinobacteria	Actinomycetales	Cellulomonadaceae	Oerskovia
1134142	Bacteria	Actinobacteria	Actinobacteria	Actinomycetales	Intrasporangiaceae	Tetrasphaera
499194	Bacteria	Armatimonadetes	OS-L
1270258	Bacteria	Armatimonadetes	SJA-176
91771	Bacteria	Armatimonadetes	Fimbriimonadia
351295	Bacteria	Bacteroidetes	Flavobacteriia	Flavobacteriales	Flavobacteriaceae	Polaribacter
326850	Bacteria	Bacteroidetes	Flavobacteriia	Flavobacteriales	Blattabacteriaceae
365794	Bacteria	Bacteroidetes	Saprospirae	Saprospirales	Chitinophagaceae	Filimonas	lacunae
379431	Bacteria	Bacteroidetes	Cytophagia	Cytophagales	Cytophagaceae	Rudanella
360503	Bacteria	Bacteroidetes	Flavobacteriia	Flavobacteriales	Cryomorphaceae	Cryomorpha
340625	Bacteria	Bacteroidetes	Cytophagia	Cytophagales	Flammeovirgaceae	Roseivirga
364065	Bacteria	Bacteroidetes	Bacteroidia	Bacteroidales	SB-1
385188	Bacteria	Bacteroidetes	Cytophagia	Cytophagales	Cyclobacteriaceae
349333	Bacteria	Bacteroidetes	Sphingobacteriia	Sphingobacteriales	Sphingobacteriaceae	Mucilaginibacter	daejeonensis
161217	Bacteria	Bacteroidetes	Flavobacteriia	Flavobacteriales	Weeksellaceae	Wautersiella
328017	Bacteria	Bacteroidetes	Flavobacteriia	Flavobacteriales	Blattabacteriaceae	Brownia	rhizoecola
392187	Bacteria	Bacteroidetes	Cytophagia	Cytophagales	Amoebophilaceae	Candidatus_Amoebophilus
378903	Bacteria	Bacteroidetes	Sphingobacteriia	Sphingobacteriales	Sphingobacteriaceae	Olivibacter
327239	Bacteria	Bacteroidetes	Cytophagia	Cytophagales	Amoebophilaceae	Candidatus_Cardinium
1460536	Bacteria	Bacteroidetes	Flavobacteriia	Flavobacteriales
390512	Bacteria	Bacteroidetes	Cytophagia	Cytophagales	Amoebophilaceae
590	Bacteria	BHI80-139
154841	Bacteria	Chlamydiae	Chlamydiia	Chlamydiales	Waddliaceae	Waddlia
1265146	Bacteria	Chlamydiae	Chlamydiia	Chlamydiales	Criblamydiaceae	Estrella	lausannensis
173939	Bacteria	Chlamydiae	Chlamydiia	Chlamydiales	Simkaniaceae
360352	Bacteria	Chlorobi	Ignavibacteria	Ignavibacteriales	Ignavibacteriaceae
496218	Bacteria	Chlorobi	BSV26	C20
134891	Bacteria	Chloroflexi	Anaerolineae	Anaerolineales	Anaerolinaceae	T78
442116	Bacteria	Chloroflexi	Anaerolineae	Caldilineales	Caldilineaceae	Litorilinea	aerophila
1442062	Bacteria	Chloroflexi	Anaerolineae	SBR1031	SHA-31
1581460	Bacteria	Chloroflexi	Chloroflexi	Chloroflexales	YCB18
1339084	Bacteria	Chloroflexi	Ktedonobacteria	Thermogemmatisporales	Thermogemmatisporaceae	Thermogemmatispora
1350207	Bacteria	Chloroflexi	Dehalococcoidetes	Dehalococcoidales	Dehalococcoidaceae
1638479	Bacteria	Chloroflexi	Anaerolineae	SB-34
1522994	Bacteria	Chloroflexi	Anaerolineae	DRC31
1315267	Bacteria	Cyanobacteria	Nostocophycideae	Nostocales	Nostocaceae	Toxopsis	calypsus
1310993	Bacteria	Cyanobacteria	Oscillatoriophycideae	Chroococcales
1315985	Bacteria	Cyanobacteria	Synechococcophycideae	Synechococcales	Chamaesiphonaceae
1351869	Bacteria	Cyanobacteria	Oscillatoriophycideae	Chroococcales	Cyanobacteriaceae
1634354	Bacteria	Cyanobacteria	Oscillatoriophycideae	Oscillatoriales	Phormidiaceae	Microcoleus
1270695	Bacteria	Cyanobacteria	Oscillatoriophycideae	Chroococcales	Xenococcaceae	Chroococcidiopsis
1337741	Bacteria	Cyanobacteria	Nostocophycideae	Nostocales	Nostocaceae	Tolypothrix	distorta
1491948	Bacteria	Cyanobacteria	Nostocophycideae	Nostocales	Nostocaceae	Stigonema	ocellatum
1315467	Bacteria	Cyanobacteria	Nostocophycideae	Nostocales	Scytonemataceae	Brasilonema	roberti-lammi
1787520	Bacteria	Cyanobacteria	4C0d-2	SM2F09
119974	Bacteria	Cyanobacteria	4C0d-2
2570186	Bacteria	Elusimicrobia
354018	Bacteria	Elusimicrobia	Endomicrobia
473521	Bacteria	Fibrobacteres	TG3	TG3-1	TSCOR003-O20
139250	Bacteria	Fibrobacteres	TG3	TG3-1	M1PL1-46
1313039	Bacteria	Firmicutes	Clostridia	Clostridiales	Caldicoprobacteraceae	Caldicoprobacter
29583	Bacteria	Firmicutes	Clostridia	Clostridiales	Veillonellaceae	Sporomusa
134114	Bacteria	Firmicutes	Bacilli	Lactobacillales	Leuconostocaceae	Leuconostoc
190623	Bacteria	Firmicutes	Bacilli	Bacillales	Sporolactobacillaceae
1313171	Bacteria	Firmicutes	Clostridia	Clostridiales	Tissierellaceae	Sedimentibacter
32950	Bacteria	Firmicutes	Bacilli	Bacillales	Thermoactinomycetaceae	Thermoflavimicrobium	dichotomicum
1449282	Bacteria	Firmicutes	Bacilli	Bacillales	Pasteuriaceae
1644910	Bacteria	Firmicutes	Bacilli	Bacillales	Alicyclobacillaceae
148496	Bacteria	Firmicutes	Bacilli	Bacillales	Bacillaceae	Oceanobacillus	chironomi
119599	Bacteria	Firmicutes	Bacilli	Bacillales	Planococcaceae	Planomicrobium
1268151	Bacteria	Firmicutes	Clostridia	Clostridiales	Acidaminobacteraceae	Fusibacter
1311465	Bacteria	Firmicutes	Clostridia	Clostridiales	Peptococcaceae	Sporotomaculum
29292	Bacteria	Firmicutes	Clostridia	Halanaerobiales
1576218	Bacteria	Firmicutes	Clostridia	Clostridiales	Tissierellaceae
1351389	Bacteria	Firmicutes	Clostridia	Natranaerobiales
118743	Bacteria	Firmicutes	Bacilli	Bacillales	Planococcaceae	Rummeliibacillus
171624	Bacteria	Firmicutes	Bacilli	Bacillales	Planococcaceae	Planococcus	maritimus
134294	Bacteria	Firmicutes	Bacilli	Bacillales	Bacillaceae	Marinibacillus
139952	Bacteria	Firmicutes	Bacilli	Lactobacillales	Leuconostocaceae	Weissella
122124	Bacteria	Firmicutes	Bacilli	Haloplasmatales	Haloplasmataceae
1308896	Bacteria	Firmicutes	Bacilli	Bacillales	Bacillaceae	Virgibacillus	halodenitrificans
519198	Bacteria	Firmicutes	Clostridia	Clostridiales	Ruminococcaceae	Oscillospira
102672	Bacteria	Firmicutes	Bacilli	Lactobacillales	Aerococcaceae	Aerococcus
25523	Bacteria	Firmicutes	Bacilli	Bacillales	Exiguobacteraceae
191811	Bacteria	Firmicutes	Bacilli	Bacillales	Bacillaceae	Geobacillus
55626	Bacteria	Firmicutes	Bacilli	Bacillales	Bacillaceae	Natronobacillus
244773	Bacteria	Firmicutes	Bacilli	Lactobacillales	Enterococcaceae	Vagococcus
1246950	Bacteria	Firmicutes	Bacilli	Bacillales	Bacillaceae	Anoxybacillus
1694595	Bacteria	Firmicutes	Clostridia	Clostridiales	Tissierellaceae	Tissierella_Soehngenia
1571239	Bacteria	Firmicutes	Clostridia	Clostridiales	Ruminococcaceae	Ruminococcus
78853	Bacteria	Firmicutes	Clostridia	Clostridiales	Veillonellaceae	G07
128114	Bacteria	Firmicutes	Bacilli	Bacillales	Paenibacillaceae	Thermobacillus	composti
1646971	Bacteria	Firmicutes	Clostridia	Clostridiales	Peptococcaceae	Desulfitobacter
2461	Bacteria	Firmicutes	Bacilli	Bacillales	Thermoactinomycetaceae
200544	Bacteria	Firmicutes	Bacilli	Bacillales	Planococcaceae	Viridibacillus
126664	Bacteria	Firmicutes	Clostridia	Clostridiales	Syntrophomonadaceae	Syntrophomonas
119215	Bacteria	Firmicutes	Clostridia	Clostridiales	Peptococcaceae	Dehalobacter_Syntrophobotulus
1159911	Bacteria	Firmicutes	Clostridia	Clostridiales	Mogibacteriaceae
1441929	Bacteria	Firmicutes	Clostridia	Clostridiales	Clostridiaceae	Geosporobacter_Thermotalea
1554279	Bacteria	Firmicutes	Clostridia	Clostridiales	Clostridiaceae	Alkaliphilus
1663621	Bacteria	Firmicutes	Bacilli	Bacillales	Bacillaceae	Anaerobacillus
1313223	Bacteria	Firmicutes	Clostridia	Clostridiales	Eubacteriaceae
86961	Bacteria	Firmicutes	Bacilli	Lactobacillales	Enterococcaceae	Enterococcus
1543397	Bacteria	Firmicutes	Clostridia	Natranaerobiales	Anaerobrancaceae	A55_D21
1429980	Bacteria	Firmicutes	Bacilli	Bacillales	Listeriaceae	Brochothrix	campestris
148606	Bacteria	Firmicutes	Bacilli	Lactobacillales	Lactobacillaceae
1137397	Bacteria	Firmicutes	Clostridia	Clostridiales	Veillonellaceae	BSV43
1579936	Bacteria	Firmicutes	Clostridia	Clostridiales	Clostridiaceae	Natronincola_Anaerovirgula
473143	Bacteria	Firmicutes	Erysipelotrichi	Erysipelotrichales	Erysipelotrichaceae	RFN20
1694259	Bacteria	Firmicutes	Clostridia	Clostridiales	Clostridiaceae	SMB53
1310125	Bacteria	GN02	SBYW_2184
14618	Bacteria	Lentisphaerae	Lentisphaeria	Victivallales	Victivallaceae
30913	Bacteria	Nitrospirae	Nitrospira	Nitrospirales
1435341	Bacteria	OP11	WCHB1-64	K2-4-19
1351023	Bacteria	OP11	OP11-2	WCHB1-07
25254	Bacteria	OP8	OP8_2
1339161	Bacteria	Planctomycetes	Planctomycetia	Gemmatales	Isosphaeraceae	Nostocoida	limicola_III
308675	Bacteria	Planctomycetes	C6	d113
326028	Bacteria	Planctomycetes	vadinHA49
1555268	Bacteria	Planctomycetes	Phycisphaerae	MBMPE71
514286	Bacteria	Planctomycetes	Planctomycetia	Gemmatales	Isosphaeraceae	Singulisphaera	rosea
509	Bacteria	Planctomycetes	C6	Ucm1571
307252	Bacteria	Planctomycetes	Phycisphaerae
73721	Bacteria	Planctomycetes	Pla3
1269646	Bacteria	Planctomycetes	ODP123
324368	Bacteria	Planctomycetes	Phycisphaerae	S-70
499777	Bacteria	Proteobacteria	Gammaproteobacteria	Oceanospirillales	Halomonadaceae	Kushneria	aurantia
131917	Bacteria	Proteobacteria	Gammaproteobacteria	Xanthomonadales	Xanthomonadaceae	Aquimonas
352201	Bacteria	Proteobacteria	Gammaproteobacteria	Vibrionales	Pseudoalteromonadaceae	Pseudoalteromonas
119475	Bacteria	Proteobacteria	Gammaproteobacteria	Methylococcales	Methylococcaceae	Methylococcus	capsulatus
1496214	Bacteria	Proteobacteria	Alphaproteobacteria	Rhodospirillales	Rhodospirillaceae	Telmatospirillum
73230	Bacteria	Proteobacteria	Betaproteobacteria	Rhodocyclales	Rhodocyclaceae	Azospira
189054	Bacteria	Proteobacteria	Betaproteobacteria	Neisseriales	Neisseriaceae	Aquitalea
160054	Bacteria	Proteobacteria	Betaproteobacteria	Burkholderiales	Comamonadaceae	Pelomonas
71190	Bacteria	Proteobacteria	Gammaproteobacteria	Xanthomonadales	Xanthomonadaceae	Pseudofulvimonas	gallinarii
17027	Bacteria	Proteobacteria	Betaproteobacteria	Tremblayales	Tremblayaceae	Candidatus_Tremblaya
70203	Bacteria	Proteobacteria	Betaproteobacteria	Hydrogenophilales	Hydrogenophilaceae	Thiobacillus
35229	Bacteria	Proteobacteria	Betaproteobacteria	Neisseriales	Neisseriaceae	Chromobacterium
28919	Bacteria	Proteobacteria	Gammaproteobacteria	Enterobacteriales	Enterobacteriaceae	Serratia	marcescens
152498	Bacteria	Proteobacteria	Betaproteobacteria	Methylophilales	Methylophilaceae	Methylovorus	glucosotrophus
123466	Bacteria	Proteobacteria	Betaproteobacteria	Rhodocyclales	Rhodocyclaceae	TS34
151433	Bacteria	Proteobacteria	Gammaproteobacteria	Enterobacteriales	Enterobacteriaceae	Proteus
1533600	Bacteria	Proteobacteria	Alphaproteobacteria	Rhodobacterales	Rhodobacteraceae	Albimonas	donghaensis
213958	Bacteria	Proteobacteria	Gammaproteobacteria	Oceanospirillales	Hahellaceae	Hahella	chejuensis
1263235	Bacteria	Proteobacteria	Alphaproteobacteria	Rhodobacterales	Rhodobacteraceae	Antarcticicola	litoralis
98381	Bacteria	Proteobacteria	Gammaproteobacteria	Pseudomonadales	Moraxellaceae	Psychrobacter	sanguinis
98165	Bacteria	Proteobacteria	Betaproteobacteria	Burkholderiales	Comamonadaceae	Simplicispira
1530769	Bacteria	Proteobacteria	Alphaproteobacteria	Rhodobacterales	Rhodobacteraceae	Thioclava	pacifica
1551747	Bacteria	Proteobacteria	Alphaproteobacteria	Rhizobiales	Bartonellaceae	Bartonella
1511160	Bacteria	Proteobacteria	Alphaproteobacteria	Rhizobiales	Brucellaceae	Pseudochrobactrum
123392	Bacteria	Proteobacteria	Betaproteobacteria	Gallionellales	Gallionellaceae	Gallionella
1551881	Bacteria	Proteobacteria	Alphaproteobacteria	Rhizobiales	Bradyrhizobiaceae	Afipia
220357	Bacteria	Proteobacteria	Betaproteobacteria	Burkholderiales	Burkholderiaceae	Salinispora
1508390	Bacteria	Proteobacteria	Alphaproteobacteria	Rhizobiales	Phyllobacteriaceae	Nitratireductor
106762	Bacteria	Proteobacteria	Gammaproteobacteria	Enterobacteriales	Enterobacteriaceae	Candidatus_Regiella	insecticola
2496867	Bacteria	Proteobacteria	Alphaproteobacteria	Rhodobacterales	Rhodobacteraceae	Loktanella
1509486	Bacteria	Proteobacteria	Alphaproteobacteria	Rhodospirillales	Rhodospirillaceae	Rhodospirillum	centenum
39310	Bacteria	Proteobacteria	Alphaproteobacteria	Rhodobacterales	Hyphomonadaceae	Hyphomonas
1525076	Bacteria	Proteobacteria	Alphaproteobacteria	Rhizobiales	Xanthobacteraceae	Xanthobacter
114527	Bacteria	Proteobacteria	Deltaproteobacteria	Bdellovibrionales	Bacteriovoracaceae	Bacteriovorax
174073	Bacteria	Proteobacteria	Gammaproteobacteria	Chromatiales	Chromatiaceae	Halochromatium
1554002	Bacteria	Proteobacteria	Alphaproteobacteria	Rhodobacterales	Rhodobacteraceae	Anaerospora
52891	Bacteria	Proteobacteria	Deltaproteobacteria	BPC076
154375	Bacteria	Proteobacteria	Betaproteobacteria	Burkholderiales	Comamonadaceae	Limnobacter
85574	Bacteria	Proteobacteria	Betaproteobacteria	Burkholderiales	Oxalobacteraceae	Oxalobacter
1655343	Bacteria	Proteobacteria	Alphaproteobacteria	Rhizobiales	Aurantimonadaceae	Fulvimarina
297103	Bacteria	Proteobacteria	Betaproteobacteria	Rhodocyclales	Rhodocyclaceae	Dok59
1531966	Bacteria	Proteobacteria	Alphaproteobacteria	Rhizobiales	Hyphomicrobiaceae	Rhodobium	orientis
29080	Bacteria	Proteobacteria	Deltaproteobacteria	Syntrophobacterales	Syntrophobacteraceae	Syntrophobacter
133606	Bacteria	Proteobacteria	Betaproteobacteria	Rhodocyclales	Rhodocyclaceae	Sterolibacterium
1633220	Bacteria	Proteobacteria	Alphaproteobacteria	Rickettsiales	Anaplasmataceae	Neorickettsia
148599	Bacteria	Proteobacteria	Gammaproteobacteria	Enterobacteriales	Enterobacteriaceae	Pantoea	ananatis
118791	Bacteria	Proteobacteria	Gammaproteobacteria	Methylococcales	Methylococcaceae	Methylocaldum
1260876	Bacteria	Proteobacteria	Betaproteobacteria	Rhodocyclales	Rhodocyclaceae	K82
1584889	Bacteria	Proteobacteria	Epsilonproteobacteria
1537536	Bacteria	Proteobacteria	Alphaproteobacteria	Rhizobiales	Rhizobiaceae	Blastobacter	capsulatus
255113	Bacteria	Proteobacteria	Gammaproteobacteria	Methylococcales	Methylococcaceae
37372	Bacteria	Proteobacteria	Betaproteobacteria	SBla14
17963	Bacteria	Proteobacteria	Gammaproteobacteria	HOC36
74154	Bacteria	Proteobacteria	Betaproteobacteria	MKC10
1630886	Bacteria	Proteobacteria	Alphaproteobacteria	Rhizobiales	Brucellaceae
75864	Bacteria	Proteobacteria	Gammaproteobacteria	Enterobacteriales	Enterobacteriaceae	Salmonella	enterica
938270	Bacteria	Proteobacteria	Alphaproteobacteria	Rhodobacterales	Rhodobacteraceae	Oceanicella	actignis
1645647	Bacteria	Proteobacteria	Alphaproteobacteria	Rhodospirillales	Acetobacteraceae	Acidisphaera	rubrifaciens
122232	Bacteria	Proteobacteria	Betaproteobacteria	Burkholderiales	Burkholderiaceae	Pandoraea
1537493	Bacteria	Proteobacteria	Alphaproteobacteria	Rhodobacterales	Rhodobacteraceae	Marivita
171262	Bacteria	Proteobacteria	Betaproteobacteria	Neisseriales	Neisseriaceae	Andreprevotia	chitinilytica
362472	Bacteria	Proteobacteria	Betaproteobacteria	Rhodocyclales	Rhodocyclaceae	Methyloversatilis
275256	Bacteria	Proteobacteria	Alphaproteobacteria	Rhodobacterales	Rhodobacteraceae	Rhodobaca
14541	Bacteria	Proteobacteria	Gammaproteobacteria	Enterobacteriales	Enterobacteriaceae	Escherichia	blattae
69042	Bacteria	Proteobacteria	Gammaproteobacteria	Enterobacteriales	Enterobacteriaceae	Trabulsiella
249940	Bacteria	Proteobacteria	Deltaproteobacteria	Desulfarculales	Desulfarculaceae
242016	Bacteria	Proteobacteria	Betaproteobacteria	Burkholderiales	Oxalobacteraceae	Telluria	mixta
691686	Bacteria	Proteobacteria	Deltaproteobacteria	Desulfuromonadales	Geobacteraceae
232047	Bacteria	Proteobacteria	Alphaproteobacteria	Rhizobiales	Aurantimonadaceae	Martelella
1447820	Bacteria	Proteobacteria	Alphaproteobacteria	Rhizobiales	Beijerinckiaceae	Beijerinckia
52923	Bacteria	Proteobacteria	Deltaproteobacteria	Desulfovibrionales	Desulfovibrionaceae	Desulfovibrio	putealis
150190	Bacteria	Proteobacteria	Betaproteobacteria	Nitrosomonadales
1635353	Bacteria	Proteobacteria	Gammaproteobacteria	Alteromonadales
1634166	Bacteria	Proteobacteria	Alphaproteobacteria	Rhodospirillales	Acetobacteraceae	Commensalibacter	intestini
97571	Bacteria	Proteobacteria	Betaproteobacteria	Burkholderiales	Comamonadaceae	RS62
182990	Bacteria	Proteobacteria	Gammaproteobacteria	Thiotrichales	Piscirickettsiaceae	Methylophaga
72843	Bacteria	Proteobacteria	Betaproteobacteria	Gallionellales	Gallionellaceae
58736	Bacteria	Proteobacteria	Deltaproteobacteria	Syntrophobacterales	Syntrophobacteraceae	Desulfovirga	adipica
88548	Bacteria	Proteobacteria	Gammaproteobacteria	Pseudomonadales	Pseudomonadaceae	Azomonas
1314291	Bacteria	Proteobacteria	Deltaproteobacteria	Desulfovibrionales	Desulfovibrionaceae
178678	Bacteria	Proteobacteria	Betaproteobacteria	Burkholderiales	Alcaligenaceae	Kerstersia	gyiorum
72216	Bacteria	Proteobacteria	Gammaproteobacteria	Oceanospirillales	Halomonadaceae
1637060	Bacteria	Proteobacteria	Alphaproteobacteria	Rhodospirillales	Acetobacteraceae	Acetobacter
1506995	Bacteria	Proteobacteria	Gammaproteobacteria	Enterobacteriales	Enterobacteriaceae	Xenorhabdus	bovienii
1679350	Bacteria	Proteobacteria	Alphaproteobacteria	Rhizobiales	Rhizobiaceae	Amorphomonas	oryzae
409845	Bacteria	Proteobacteria	Betaproteobacteria	Burkholderiales	Comamonadaceae	Tepidimonas
409970	Bacteria	Proteobacteria	Betaproteobacteria	Thiobacterales
96508	Bacteria	Proteobacteria	Betaproteobacteria	Burkholderiales	Comamonadaceae	Lampropedia
1546739	Bacteria	Proteobacteria	Alphaproteobacteria	Rhodospirillales	Acetobacteraceae	Acidisoma
1315640	Bacteria	Proteobacteria	Alphaproteobacteria	Rhodobacterales	Hyphomonadaceae	Maricaulis
193077	Bacteria	Proteobacteria	Gammaproteobacteria	Enterobacteriales	Enterobacteriaceae	Citrobacter
367008	Bacteria	Proteobacteria	Deltaproteobacteria	MBNT15
199465	Bacteria	Proteobacteria	Gammaproteobacteria	Aeromonadales
83169	Bacteria	Proteobacteria	Gammaproteobacteria	Marinicellales	Marinicellaceae
1347573	Bacteria	Proteobacteria	Epsilonproteobacteria	Campylobacterales	Campylobacteraceae	Arcobacter	cryaerophilus
182480	Bacteria	Proteobacteria	Betaproteobacteria	Thiobacterales	Thiobacteraceae
219879	Bacteria	Proteobacteria	Gammaproteobacteria	Alteromonadales	HTCC2188	HTCC
191658	Bacteria	Proteobacteria	Deltaproteobacteria	Sva0485
92085	Bacteria	Proteobacteria	Betaproteobacteria	Rhodocyclales	Rhodocyclaceae	Thauera
1635858	Bacteria	Proteobacteria	Deltaproteobacteria	AF420338
150477	Bacteria	Proteobacteria	Deltaproteobacteria	NB1-j	JTB38
690008	Bacteria	Proteobacteria	Betaproteobacteria	Rhodocyclales	Rhodocyclaceae	C39
157408	Bacteria	Proteobacteria	Betaproteobacteria	Burkholderiales	Comamonadaceae	Diaphorobacter
131859	Bacteria	Proteobacteria	Gammaproteobacteria	PYR10d3
1126783	Bacteria	Proteobacteria	Betaproteobacteria	Rhodocyclales	Rhodocyclaceae	Zoogloea
188925	Bacteria	Proteobacteria	Gammaproteobacteria	Alteromonadales	Shewanellaceae	Shewanella
106435	Bacteria	Proteobacteria	Gammaproteobacteria	Xanthomonadales	Sinobacteraceae	Hydrocarboniphaga	effusa
1672110	Bacteria	Proteobacteria	Alphaproteobacteria	Rhodospirillales	Acetobacteraceae	Gluconobacter
1448430	Bacteria	Proteobacteria	Alphaproteobacteria	Rhizobiales	Bradyrhizobiaceae	Pseudomonas	carboxydohydrogena
121247	Bacteria	Proteobacteria	Betaproteobacteria	Rhodocyclales	Rhodocyclaceae	Rhodocyclus
694557	Bacteria	Proteobacteria	Betaproteobacteria	Rhodocyclales	Rhodocyclaceae	Sulfuritalea
257754	Bacteria	Proteobacteria	Gammaproteobacteria	Methylococcales	Methylococcaceae	Methylobacter	luteus
256387	Bacteria	Proteobacteria	Gammaproteobacteria	Methylococcales	Methylococcaceae	Methylomicrobium	agile
486377	Bacteria	Proteobacteria	Betaproteobacteria	Methylophilales	Methylophilaceae	Methylobacillus
1530930	Bacteria	Proteobacteria	Alphaproteobacteria	Rhodospirillales	Rhodospirillaceae	Oleomonas
214200	Bacteria	Proteobacteria	Gammaproteobacteria	Oceanospirillales	Oceanospirillaceae	Oleibacter
69835	Bacteria	Proteobacteria	Gammaproteobacteria	Alteromonadales	Alteromonadaceae	Marinobacter
1650090	Bacteria	Proteobacteria	Alphaproteobacteria	Rhizobiales	Xanthobacteraceae	Azorhizobium
1595927	Bacteria	Proteobacteria	Alphaproteobacteria	Rhizobiales	Rhizobiaceae	Liberibacter	crescenBT-1
181750	Bacteria	Proteobacteria	Gammaproteobacteria	Oceanospirillales	SUP05
203218	Bacteria	Proteobacteria	Gammaproteobacteria	Oceanospirillales	Oceanospirillaceae
75677	Bacteria	Proteobacteria	Betaproteobacteria	Procabacteriales	Procabacteriaceae	Procabacter
396337	Bacteria	Proteobacteria	Alphaproteobacteria	Rhizobiales	Xanthobacteraceae	Ancylobacter
79602	Bacteria	Proteobacteria	Gammaproteobacteria	Xanthomonadales	Xanthomonadaceae	Silanimonas	mangrovi
190330	Bacteria	Proteobacteria	Gammaproteobacteria	Acidithiobacillales	Acidithiobacillaceae	Acidithiobacillus
149949	Bacteria	Proteobacteria	Gammaproteobacteria	Methylococcales
156737	Bacteria	Proteobacteria	Betaproteobacteria	Burkholderiales	Burkholderiaceae	Candidatus_Glomeribacter	gigasporarum
88739	Bacteria	Proteobacteria	Gammaproteobacteria	Aeromonadales	Aeromonadaceae
1692614	Bacteria	Proteobacteria	Gammaproteobacteria	Chromatiales	Ectothiorhodospiraceae	Halorhodospira
1683220	Bacteria	Proteobacteria	Alphaproteobacteria	Rhodospirillales	Rhodospirillaceae	Rhodovibrio
1578655	Bacteria	Proteobacteria	Alphaproteobacteria	Rhodospirillales	Rhodospirillaceae	Oceanibaculum	indicum
229540	Bacteria	Proteobacteria	Gammaproteobacteria	Salinisphaerales
118979	Bacteria	Proteobacteria	Betaproteobacteria	Neisseriales	Neisseriaceae
25389	Bacteria	Proteobacteria	Gammaproteobacteria	Enterobacteriales	Enterobacteriaceae	Buchnera
69608	Bacteria	Proteobacteria	Deltaproteobacteria	Desulfobacterales	Desulfobacteraceae
177389	Bacteria	Proteobacteria	Gammaproteobacteria	Enterobacteriales	Enterobacteriaceae	Sodalis
1667410	Bacteria	Proteobacteria	Alphaproteobacteria	Rhodospirillales	Rhodospirillaceae	Constrictibacter	antarcticus
935345	Bacteria	Proteobacteria	Gammaproteobacteria	Thiohalorhabdales
1516738	Bacteria	Proteobacteria	Alphaproteobacteria	Rhodospirillales	Rhodospirillaceae	Novispirillum
1566202	Bacteria	Proteobacteria	Alphaproteobacteria	Rhodospirillales	Acetobacteraceae	Acidiphilium
1549460	Bacteria	Proteobacteria	Alphaproteobacteria	Rhizobiales	Beijerinckiaceae	Methyloferula	stellata
1556602	Bacteria	Proteobacteria	Alphaproteobacteria	Rhodobacterales	Rhodobacteraceae	Jannaschia
1498606	Bacteria	Proteobacteria	Alphaproteobacteria	Kiloniellales	Kiloniellaceae
1549739	Bacteria	Proteobacteria	Betaproteobacteria	Burkholderiales	Comamonadaceae	Verminephrobacter
1660864	Bacteria	Proteobacteria	Alphaproteobacteria	Rhizobiales	Hyphomicrobiaceae	Filomicrobium	fusiforme
176841	Bacteria	Proteobacteria	Betaproteobacteria	Burkholderiales	Alcaligenaceae	Tetrathiobacter	kashmirensis
1495238	Bacteria	Proteobacteria	Alphaproteobacteria	Rhizobiales	Bradyrhizobiaceae	Nitrobacter
17499	Bacteria	Proteobacteria	Deltaproteobacteria	Desulfovibrionales	Desulfohalobiaceae	Desulfovermiculus
136918	Bacteria	Proteobacteria	Gammaproteobacteria	Enterobacteriales	Enterobacteriaceae	Samsonia	erythrinae
395225	Bacteria	Proteobacteria	Gammaproteobacteria	Enterobacteriales	Enterobacteriaceae	Klebsiella
1677125	Bacteria	Proteobacteria	Epsilonproteobacteria	Nautiliales	Nautiliaceae
1520440	Bacteria	Proteobacteria	Alphaproteobacteria	Rhodospirillales	Acetobacteraceae	Craurococcus	roseus
1433252	Bacteria	Proteobacteria	Alphaproteobacteria	Rhodobacterales	Rhodobacteraceae	Rhodovulum
68241	Bacteria	Proteobacteria	Betaproteobacteria	Rhodocyclales	Rhodocyclaceae	Z-35
108574	Bacteria	Proteobacteria	Betaproteobacteria	Burkholderiales	Comamonadaceae	Schlegelella
507542	Bacteria	Spirochaetes	Leptospirae	Leptospirales	Leptospiraceae	Leptospira
942568	Bacteria	Spirochaetes	Spirochaetes	Spirochaetales	Spirochaetaceae	Treponema
1505602	Bacteria	Spirochaetes	Leptospirae	Leptospirales	Leptospiraceae	Leptonema
1492013	Bacteria	Spirochaetes	MVP-15	PL-11B10
1161805	Bacteria	Tenericutes	Mollicutes
383638	Bacteria	Tenericutes	Mollicutes	Anaeroplasmatales	Anaeroplasmataceae
1270645	Bacteria	Thermotogae	Thermotogae	Thermotogales	Thermotogaceae	AUTHM297
70004	Bacteria	TM6	SJA-4	S1198
1314744	Bacteria	TM7	TM7-3	Blgi18
22466	Bacteria	Verrucomicrobia	Verruco-5	R76-B128
110167	Bacteria	Verrucomicrobia	Verrucomicrobiae	Verrucomicrobiales	Verrucomicrobiaceae	Haloferula	helveola
320964	Bacteria	Verrucomicrobia	Opitutae	Puniceicoccales	Puniceicoccaceae
14990	Bacteria	Verrucomicrobia	Verruco-5	WCHB1-41
66651	Bacteria	Verrucomicrobia	Verrucomicrobiae	Verrucomicrobiales	Verrucomicrobiaceae	Verrucomicrobium
53704	Bacteria	Verrucomicrobia	Methylacidiphilae	Methylacidiphilales	Methylacidiphilaceae	Candidatus_Methylacidiphilum	infernorum
68966	Bacteria	Verrucomicrobia	Verruco-5	LD1-PB3
3342	Bacteria	WS3	PRR-12	wb1_H11

## Sheet: Tomato unique
OTU ID	Kingdom	Phylum	Class	Order	Famiy	Genus	Species
730542	k_Bacteria	p_Acidobacteria	c_Holophagae	o_Holophagales	f_Holophagaceae	g_Geothrix	s_
2070680	k_Bacteria	p_Actinobacteria	c_OPB41	o_	f_	g_	s_
1382610	k_Bacteria	p_Bacteroidetes	c_Cytophagia	o_Cytophagales	f_Cytophagaceae	g_Flectobacillus	s_
1486085	k_Bacteria	p_Bacteroidetes	c_Rhodothermi	o_Rhodothermales	f_Balneolaceae	g_	s_
2077025	k_Bacteria	p_Cyanobacteria	c_Oscillatoriophycideae	o_Chroococcales	f_Gomphosphaeriaceae	g_Synechocystis	s_aquatilis
2075364	k_Bacteria	p_Cyanobacteria	c_Synechococcophycideae	o_Pseudanabaenales	f_Pseudanabaenaceae	g_Nodosilinea	s_nodulosa
2076052	k_Bacteria	p_Cyanobacteria	c_Nostocophycideae	o_Nostocales	f_Nostocaceae	g_Calothrix	s_brevissima
2105325	k_Bacteria	p_GN02	c_BB34	o_	f_	g_	s_
2563296	k_Bacteria	p_OP1	c_MSBL6	o_	f_	g_	s_
800837	k_Bacteria	p_Proteobacteria	c_Gammaproteobacteria	o_Alteromonadales	f_Chromatiaceae	g_Rheinheimera	s_
2105457	k_Bacteria	p_Synergistetes	c_Synergistia	o_Synergistales	f_Synergistaceae	g_Candidatus_Tammella	s_
2563148	k_Bacteria	p_Thermi	c_Deinococci	o_Thermales	f_Thermaceae	g_Meiothermus	s_
2318913	k_Bacteria	p_WS5	c_	o_	f_	g_	s_
2187739	k_Bacteria	p_WS6	c_SC72	o_	f_	g_	s_

## Sheet: Intersection Soil-tomato-ruderal plants
OTU ID	Kingdom	Phylum	Class	Order	Famiy	Genus	Species
1541364	Bacteria	Acidobacteria	BPC102	B110
76966	Bacteria	Acidobacteria	Chloracidobacteria	DS-100
1433544	Bacteria	Acidobacteria	Solibacteres	Solibacterales	Bryobacteraceae
306068	Bacteria	Acidobacteria	Chloracidobacteria	RB41
919	Bacteria	Acidobacteria	Acidobacteria-6	CCU21
1341548	Bacteria	Acidobacteria	Solibacteres	Solibacterales	Solibacteraceae	Candidatus_Solibacter
495862	Bacteria	Acidobacteria	DA052	Ellin6513
20947	Bacteria	Acidobacteria	iii1-8	DS-18
1527103	Bacteria	Acidobacteria	Solibacteres	Solibacterales	AKIW659
268424	Bacteria	Acidobacteria	Chloracidobacteria
528744	Bacteria	Acidobacteria	Acidobacteria-5
1267510	Bacteria	Acidobacteria	PAUC37f
1444650	Bacteria	Acidobacteria	Acidobacteriia	Acidobacteriales	Acidobacteriaceae	Terriglobus
266374	Bacteria	Acidobacteria	Chloracidobacteria	11-24
2017	Bacteria	Acidobacteria	S035
70429	Bacteria	Acidobacteria	RB25
2204745	Bacteria	Acidobacteria	Solibacteres	JH-WHS99
1343777	Bacteria	Acidobacteria	Chloracidobacteria	PK29
103345	Bacteria	Acidobacteria	Acidobacteria-6
840	Bacteria	Acidobacteria	Acidobacteria-6	iii1-15	RB40
21007	Bacteria	Acidobacteria	Acidobacteria-6	iii1-15
473196	Bacteria	Acidobacteria	BPC102	MVS-40
1495274	Bacteria	Acidobacteria	Acidobacteriia	Acidobacteriales	Acidobacteriaceae	Acidopila	rosea
386	Bacteria	Acidobacteria	Acidobacteria-6	iii1-15	mb2424
1440312	Bacteria	Acidobacteria	Solibacteres	Solibacterales	Solibacteraceae
1341999	Bacteria	Acidobacteria	Solibacteres	Solibacterales
2072	Bacteria	Acidobacteria	iii1-8	32-20
1347382	Bacteria	Acidobacteria	Chloracidobacteria	RB41	Ellin6075
1441427	Bacteria	Acidobacteria	Acidobacteriia	Acidobacteriales	Acidobacteriaceae
1522720	Bacteria	Acidobacteria	Solibacteres	Solibacterales	MVS-65
538345	Bacteria	Acidobacteria	EC1113
21909	Bacteria	Acidobacteria	Sva0725	Sva0725
1440157	Bacteria	Acidobacteria	Acidobacteriia	Acidobacteriales	Acidobacteriaceae	Edaphobacter	modestum
1445316	Bacteria	Acidobacteria	Acidobacteriia	Acidobacteriales	Koribacteraceae
1427841	Bacteria	Acidobacteria	Acidobacteriia	Acidobacteriales	Koribacteraceae	Candidatus_Koribacter
25113	Bacteria	Actinobacteria	Thermoleophilia	Solirubrobacterales	Conexibacteraceae
695921	Bacteria	Actinobacteria	Actinobacteria	Actinomycetales	Intrasporangiaceae	Terracoccus
1129241	Bacteria	Actinobacteria	Actinobacteria	Actinomycetales	Streptosporangiaceae	Streptosporangium
935932	Bacteria	Actinobacteria	Actinobacteria	Actinomycetales	Actinosynnemataceae	Kutzneria
409218	Bacteria	Actinobacteria	Actinobacteria	Actinomycetales	Thermomonosporaceae
692544	Bacteria	Actinobacteria	Actinobacteria	Actinomycetales	Micromonosporaceae	Phytohabitans	suffuscus
498788	Bacteria	Actinobacteria	Actinobacteria	Actinomycetales	Microbacteriaceae	Yonghaparkia
569135	Bacteria	Actinobacteria	Actinobacteria	Actinomycetales	Cryptosporangiaceae	Cryptosporangium
486403	Bacteria	Actinobacteria	Actinobacteria	Actinomycetales	Mycobacteriaceae	Mycobacterium
940157	Bacteria	Actinobacteria	Actinobacteria	Actinomycetales	Sporichthyaceae	Sporichthya
1311547	Bacteria	Actinobacteria	Acidimicrobiia	Acidimicrobiales
365116	Bacteria	Actinobacteria	Actinobacteria	Actinomycetales	Micromonosporaceae	Catellatospora
20108	Bacteria	Actinobacteria	Thermoleophilia	Solirubrobacterales	Solirubrobacteraceae	Solirubrobacter
1347496	Bacteria	Actinobacteria	Acidimicrobiia	Acidimicrobiales	EB1017
690894	Bacteria	Actinobacteria	MB-A2-108	0319-7L14
388822	Bacteria	Actinobacteria	Actinobacteria	Actinomycetales	Geodermatophilaceae	Geodermatophilus	obscurus
395828	Bacteria	Actinobacteria	Actinobacteria	Actinomycetales	Pseudonocardiaceae	Amycolatopsis
941998	Bacteria	Actinobacteria	Actinobacteria	Actinomycetales	Micrococcaceae	Kocuria	rhizophila
357018	Bacteria	Actinobacteria	Actinobacteria	Actinomycetales	Micromonosporaceae
690331	Bacteria	Actinobacteria	Actinobacteria	Actinomycetales	Micromonosporaceae	Dactylosporangium
391159	Bacteria	Actinobacteria	Actinobacteria	Actinomycetales	Actinosynnemataceae	Lentzea
1150213	Bacteria	Actinobacteria	Actinobacteria	Actinomycetales	Propionibacteriaceae
939791	Bacteria	Actinobacteria	Actinobacteria	Actinomycetales	Micrococcaceae	Microbispora	rosea
1130644	Bacteria	Actinobacteria	Actinobacteria	Actinomycetales	Nocardioidaceae	Actinopolymorpha
486418	Bacteria	Actinobacteria	Actinobacteria	Actinomycetales	Cellulomonadaceae	Cellulomonas
938379	Bacteria	Actinobacteria	Actinobacteria	Actinomycetales	Nocardioidaceae	Aeromicrobium
393387	Bacteria	Actinobacteria	Actinobacteria	Actinomycetales	Micromonosporaceae	Virgisporangium	ochraceum
413940	Bacteria	Actinobacteria	Actinobacteria	Actinomycetales	Kineosporiaceae
569847	Bacteria	Actinobacteria	Actinobacteria	Actinomycetales	Thermomonosporaceae	Actinoallomurus
391174	Bacteria	Actinobacteria	Actinobacteria	Actinomycetales	Glycomycetaceae	Glycomyces
939888	Bacteria	Actinobacteria	Actinobacteria	Actinomycetales	Nocardiaceae	Nocardia
1128036	Bacteria	Actinobacteria	Actinobacteria	Actinomycetales	Cellulomonadaceae	Demequina
939906	Bacteria	Actinobacteria	Actinobacteria	Actinomycetales	Nocardiaceae
385741	Bacteria	Actinobacteria	Actinobacteria	Actinomycetales	Microbacteriaceae
1147328	Bacteria	Actinobacteria	Actinobacteria	Actinomycetales	Streptosporangiaceae	Clavisporangium	rectum
415861	Bacteria	Actinobacteria	Actinobacteria	Actinomycetales	Microbacteriaceae	Salinibacterium
473682	Bacteria	Actinobacteria	MB-A2-108
388457	Bacteria	Actinobacteria	Actinobacteria	Actinomycetales	Kineosporiaceae	Kineococcus
355337	Bacteria	Actinobacteria	Actinobacteria	Actinomycetales	Micromonosporaceae	Actinoplanes
393479	Bacteria	Actinobacteria	Actinobacteria	Actinomycetales	Streptomycetaceae	Streptacidiphilus
392075	Bacteria	Actinobacteria	Actinobacteria	Actinomycetales	Streptomycetaceae	Streptomyces
486297	Bacteria	Actinobacteria	Actinobacteria	Actinomycetales	Nocardioidaceae
470737	Bacteria	Actinobacteria	Actinobacteria	Actinomycetales	Micrococcaceae	Arthrobacter
941593	Bacteria	Actinobacteria	Actinobacteria	Actinomycetales	Gordoniaceae	Gordonia
394524	Bacteria	Actinobacteria	Actinobacteria	Actinomycetales	Intrasporangiaceae	Knoellia	subterranea
1432578	Bacteria	Actinobacteria	Thermoleophilia	Gaiellales	AK1AB1_02E
569529	Bacteria	Actinobacteria	Actinobacteria	Actinomycetales	Geodermatophilaceae	Modestobacter
528891	Bacteria	Actinobacteria	Actinobacteria	Actinomycetales	Intrasporangiaceae	Phycicoccus
938564	Bacteria	Actinobacteria	Actinobacteria	Actinomycetales	Propionibacteriaceae	Microlunatus
386880	Bacteria	Actinobacteria	Actinobacteria	Actinomycetales	Streptomycetaceae
539055	Bacteria	Actinobacteria	Actinobacteria	Actinomycetales	Cryptosporangiaceae
26148	Bacteria	Actinobacteria	Thermoleophilia	Solirubrobacterales	Patulibacteraceae
360375	Bacteria	Actinobacteria	Actinobacteria	Actinomycetales	Micromonosporaceae	Couchioplanes
539951	Bacteria	Actinobacteria	Actinobacteria	Actinomycetales	Geodermatophilaceae	Blastococcus	aggregatus
942547	Bacteria	Actinobacteria	Actinobacteria	Actinomycetales	Intrasporangiaceae
367837	Bacteria	Actinobacteria	Actinobacteria
1351130	Bacteria	Actinobacteria	Actinobacteria	Actinomycetales	Actinosynnemataceae
396160	Bacteria	Actinobacteria	Actinobacteria	Actinomycetales	Promicromonosporaceae	Cellulosimicrobium
1127078	Bacteria	Actinobacteria	Actinobacteria	Actinomycetales	Williamsiaceae	Williamsia
520721	Bacteria	Actinobacteria	Actinobacteria	Actinomycetales	Bogoriellaceae	Georgenia
1342063	Bacteria	Actinobacteria	Actinobacteria	Actinomycetales	Streptosporangiaceae	Herbidospora	cretacea
692048	Bacteria	Actinobacteria	Actinobacteria	Actinomycetales	Promicromonosporaceae	Promicromonospora
349884	Bacteria	Actinobacteria	Actinobacteria	Actinomycetales	Pseudonocardiaceae	Pseudonocardia
690290	Bacteria	Actinobacteria	Actinobacteria	Actinomycetales	Micromonosporaceae	Micromonospora	carbonacea
14397	Bacteria	Actinobacteria	Thermoleophilia	Solirubrobacterales	Solirubrobacteraceae
106027	Bacteria	Actinobacteria	Thermoleophilia	Gaiellales	Gaiellaceae
1165052	Bacteria	Actinobacteria	Actinobacteria	Actinomycetales	Intrasporangiaceae	Oryzihumus	leptocrescens
473651	Bacteria	Actinobacteria	Actinobacteria	Actinomycetales	Nocardioidaceae	Pimelobacter
349603	Bacteria	Actinobacteria	Actinobacteria	Actinomycetales	Actinospicaceae
1432577	Bacteria	Actinobacteria	Acidimicrobiia	Acidimicrobiales	JdFBGBact
355377	Bacteria	Actinobacteria	Actinobacteria	Actinomycetales	Pseudonocardiaceae	Actinomycetospora
693849	Bacteria	Actinobacteria	Actinobacteria	Actinomycetales	Micromonosporaceae	Pilimelia
538700	Bacteria	Actinobacteria	Actinobacteria	Actinomycetales	Geodermatophilaceae
938367	Bacteria	Actinobacteria	Actinobacteria	Actinomycetales	Nocardioidaceae	Kribbella
938776	Bacteria	Actinobacteria	Actinobacteria	Actinomycetales	Frankiaceae
937782	Bacteria	Actinobacteria	Actinobacteria	Actinomycetales
1130373	Bacteria	Actinobacteria	Actinobacteria	Actinomycetales	Intrasporangiaceae	Kribbia	dieselivorans
939848	Bacteria	Actinobacteria	Actinobacteria	Actinomycetales	Cellulomonadaceae	Actinotalea
441939	Bacteria	Actinobacteria	Actinobacteria	Actinomycetales	Microbacteriaceae	Agromyces
324351	Bacteria	Actinobacteria	Actinobacteria	Actinomycetales	Nocardioidaceae	Nocardioides
1310284	Bacteria	Actinobacteria	Acidimicrobiia	Acidimicrobiales	Iamiaceae	Iamia
1128048	Bacteria	Actinobacteria	Actinobacteria	Actinomycetales	Frankiaceae	Frankia
690203	Bacteria	Actinobacteria	Actinobacteria	Actinomycetales	Streptosporangiaceae	Nonomuraea
692316	Bacteria	Actinobacteria	Actinobacteria	Actinomycetales	Microbacteriaceae	Microbacterium
23398	Bacteria	Actinobacteria	Thermoleophilia	Solirubrobacterales
519203	Bacteria	Actinobacteria	Actinobacteria	Actinomycetales	Micrococcaceae	Sinomonas
693738	Bacteria	Actinobacteria	Actinobacteria	Actinomycetales	Thermomonosporaceae	Actinomadura	vinacea
940284	Bacteria	Actinobacteria	Actinobacteria	Actinomycetales	Actinosynnemataceae	Kibdelosporangium
693115	Bacteria	Actinobacteria	Actinobacteria	Actinomycetales	Intrasporangiaceae	Intrasporangium	calvum
539736	Bacteria	Actinobacteria	Actinobacteria	Actinomycetales	Pseudonocardiaceae
1439820	Bacteria	Actinobacteria	Actinobacteria	Actinomycetales	Thermomonosporaceae	Actinocorallia
412737	Bacteria	Actinobacteria	Actinobacteria	Actinomycetales	Micrococcaceae
943571	Bacteria	Actinobacteria	Actinobacteria	Actinomycetales	Nakamurellaceae
78906	Bacteria	Actinobacteria	Rubrobacteria	Rubrobacterales	Rubrobacteraceae	Rubrobacter
695478	Bacteria	Actinobacteria	Actinobacteria	Actinomycetales	Kineosporiaceae	Kineosporia
935810	Bacteria	Actinobacteria	Actinobacteria	Actinomycetales	Streptosporangiaceae
940332	Bacteria	Actinobacteria	Actinobacteria	Micrococcales
569661	Bacteria	Actinobacteria	Acidimicrobiia	Acidimicrobiales	Microthrixaceae
942453	Bacteria	Actinobacteria	Actinobacteria	Actinomycetales	Microbacteriaceae	Cryocola
1125539	Bacteria	Actinobacteria	Actinobacteria	Actinomycetales	Actinosynnemataceae	Amycolatopsis	fastidiosa
1127103	Bacteria	Actinobacteria	Actinobacteria	Actinomycetales	Nocardiaceae	Rhodococcus	fascians
386666	Bacteria	Actinobacteria	Actinobacteria	Actinomycetales	Sporichthyaceae
1342123	Bacteria	Actinobacteria	Acidimicrobiia	Acidimicrobiales	C111
935035	Bacteria	Actinobacteria	Actinobacteria	Actinomycetales	Micromonosporaceae	Catenuloplanes	nepalensis
539877	Bacteria	Actinobacteria	Actinobacteria	Actinomycetales	Promicromonosporaceae	Xylanimicrobium
1248537	Bacteria	Actinobacteria	Actinobacteria	Actinomycetales	Streptosporangiaceae	Sphaerisporangium
24124	Bacteria	Actinobacteria	Thermoleophilia	Solirubrobacterales	Conexibacteraceae	Conexibacter
1313072	Bacteria	Actinobacteria	Acidimicrobiia	Acidimicrobiales	AKIW874
936016	Bacteria	Actinobacteria	Rubrobacteria	Rubrobacterales	Rubrobacteraceae
937523	Bacteria	Actinobacteria	Actinobacteria	Actinomycetales	Actinosynnemataceae	Saccharothrix
389648	Bacteria	Actinobacteria	Actinobacteria	Actinomycetales	Micromonosporaceae	Verrucosispora	gifhornensis
364852	Bacteria	Actinobacteria	Actinobacteria	Actinomycetales	Actinosynnemataceae	Actinokineospora	diospyrosa
940127	Bacteria	Actinobacteria	Nitriliruptoria	Euzebyales	Euzebyaceae	Euzebya
98020	Bacteria	Actinobacteria	Thermoleophilia	Gaiellales
1427923	Bacteria	AD3	JG37-AG-4
1313854	Bacteria	AD3	ABS-6
1349009	Bacteria	Armatimonadetes	0319-6E2
1311621	Bacteria	Armatimonadetes	Fimbriimonadia	Fimbriimonadales	Fimbriimonadaceae	Fimbriimonas
1310167	Bacteria	Armatimonadetes	SJA-176	RB046
1441789	Bacteria	Armatimonadetes	OPB50
1145767	Bacteria	Armatimonadetes	Armatimonadia	Armatimonadales	Armatimonadaceae
1311781	Bacteria	Armatimonadetes	Chthonomonadetes	Chthonomonadales
1312126	Bacteria	Armatimonadetes	Chthonomonadetes	Chthonomonadales	Chthonomonadaceae
1308255	Bacteria	Armatimonadetes	Armatimonadia	FW68
1346797	Bacteria	Armatimonadetes	SHA-37
1149791	Bacteria	Armatimonadetes	Chthonomonadetes	SJA-22
1341685	Bacteria	Armatimonadetes	Fimbriimonadia	Fimbriimonadales	Fimbriimonadaceae
339674	Bacteria	Bacteroidetes	Sphingobacteriia	Sphingobacteriales	Sphingobacteriaceae	Pedobacter
355553	Bacteria	Bacteroidetes	Cytophagia	Cytophagales	Cytophagaceae	Adhaeribacter
360281	Bacteria	Bacteroidetes	Flavobacteriia	Flavobacteriales	Flavobacteriaceae
339879	Bacteria	Bacteroidetes	Saprospirae	Saprospirales	Saprospiraceae
355890	Bacteria	Bacteroidetes	Cytophagia	Cytophagales
361586	Bacteria	Bacteroidetes	Flavobacteriia	Flavobacteriales	Weeksellaceae
341420	Bacteria	Bacteroidetes	Saprospirae	Saprospirales	Chitinophagaceae	Flavihumibacter
340565	Bacteria	Bacteroidetes	Saprospirae	Saprospirales	Chitinophagaceae	Flavisolibacter
340531	Bacteria	Bacteroidetes	Saprospirae	Saprospirales	Chitinophagaceae	Niastella
407619	Bacteria	Bacteroidetes	Rhodothermi	Rhodothermales	Rhodothermaceae	Rubricoccus
385713	Bacteria	Bacteroidetes	Cytophagia	Cytophagales	Cytophagaceae	Sporocytophaga
355062	Bacteria	Bacteroidetes	Flavobacteriia	Flavobacteriales	Weeksellaceae	Cloacibacterium
339719	Bacteria	Bacteroidetes	Cytophagia	Cytophagales	Cytophagaceae	Hymenobacter
351416	Bacteria	Bacteroidetes	VC2_1_Bac22
354693	Bacteria	Bacteroidetes	Saprospirae	Saprospirales	Chitinophagaceae	Lacibacter	cauensis
339560	Bacteria	Bacteroidetes	Flavobacteriia	Flavobacteriales	Cryomorphaceae
340527	Bacteria	Bacteroidetes	Saprospirae	Saprospirales	Chitinophagaceae	Chitinophaga
351332	Bacteria	Bacteroidetes	Cytophagia	Cytophagales	Cytophagaceae
339548	Bacteria	Bacteroidetes	Sphingobacteriia	Sphingobacteriales
323513	Bacteria	Bacteroidetes	Saprospirae	Saprospirales	Chitinophagaceae	Segetibacter
355410	Bacteria	Bacteroidetes	Cytophagia	Cytophagales	Cytophagaceae	Rhodocytophaga
342785	Bacteria	Bacteroidetes	Cytophagia	Cytophagales	Cytophagaceae	Spirosoma
340568	Bacteria	Bacteroidetes	Saprospirae	Saprospirales
341088	Bacteria	Bacteroidetes	Flavobacteriia	Flavobacteriales	Cryomorphaceae	Crocinitomix
350486	Bacteria	Bacteroidetes	Cytophagia	Cytophagales	Cytophagaceae	Larkinella
351602	Bacteria	Bacteroidetes	Saprospirae	Saprospirales	Chitinophagaceae	Sediminibacterium
340218	Bacteria	Bacteroidetes	Saprospirae	Saprospirales	Chitinophagaceae
340692	Bacteria	Bacteroidetes	Sphingobacteriia	Sphingobacteriales	Sphingobacteriaceae
341226	Bacteria	Bacteroidetes	Flavobacteriia	Flavobacteriales	Weeksellaceae	Chryseobacterium
359963	Bacteria	Bacteroidetes	Flavobacteriia	Flavobacteriales	Cryomorphaceae	Fluviicola
353713	Bacteria	Bacteroidetes	At12OctB3
1333076	Bacteria	Bacteroidetes	Bacteroidia	Bacteroidales
391464	Bacteria	Bacteroidetes	Cytophagia	Cytophagales	Cytophagaceae	Cytophaga
340569	Bacteria	Bacteroidetes	Cytophagia	Cytophagales	Cytophagaceae	Dyadobacter
351223	Bacteria	Bacteroidetes	Flavobacteriia	Flavobacteriales	Flavobacteriaceae	Flavobacterium	columnare
307471	Bacteria	BRC1	PRR-11
24964	Bacteria	Chlamydiae	Chlamydiia	Chlamydiales	Parachlamydiaceae	Candidatus_Protochlamydia
106295	Bacteria	Chlamydiae	Chlamydiia	Chlamydiales	Rhabdochlamydiaceae	Candidatus_Rhabdochlamydia
69829	Bacteria	Chlamydiae	Chlamydiia
69261	Bacteria	Chlamydiae	Chlamydiia	Chlamydiales
70993	Bacteria	Chlamydiae	Chlamydiia	Chlamydiales	Parachlamydiaceae
432558	Bacteria	Chlorobi	SJA-28
412417	Bacteria	Chlorobi
431459	Bacteria	Chlorobi	OPB56
1240983	Bacteria	Chloroflexi	Ktedonobacteria	Thermogemmatisporales
1312178	Bacteria	Chloroflexi
1338577	Bacteria	Chloroflexi	TK17	TK18
2167754	Bacteria	Chloroflexi	P2-11E
1313783	Bacteria	Chloroflexi	Ktedonobacteria	B12-WMSP1
1446220	Bacteria	Chloroflexi	Ktedonobacteria	Elev-1554
1526508	Bacteria	Chloroflexi	Chloroflexi	Roseiflexales	Roseiflexaceae
1496506	Bacteria	Chloroflexi	Ktedonobacteria
538205	Bacteria	Chloroflexi	Ktedonobacteria	JG30-KF-AS9
1547483	Bacteria	Chloroflexi	Anaerolineae	SJA-15
1432760	Bacteria	Chloroflexi	Anaerolineae	Ardenscatenales	Ardenscatenaceae	Ardenscatena
1435122	Bacteria	Chloroflexi	SAR202
1351270	Bacteria	Chloroflexi	Thermomicrobia	Ellin6537
1497061	Bacteria	Chloroflexi	Ktedonobacteria	Ktedonobacterales	Ktedonobacteraceae	FFCH10602
1432532	Bacteria	Chloroflexi	Anaerolineae	H39
1512732	Bacteria	Chloroflexi	Chloroflexi	Roseiflexales	Roseiflexaceae	Roseiflexus
1440401	Bacteria	Chloroflexi	TK10	B07_WMSP1	FFCH4570
1446036	Bacteria	Chloroflexi	TK10
1343359	Bacteria	Chloroflexi	S085
1435242	Bacteria	Chloroflexi	Anaerolineae	Anaerolineales	Anaerolinaceae	Anaerolinea
1348315	Bacteria	Chloroflexi	Anaerolineae	GCA004
1347138	Bacteria	Chloroflexi	Ellin6529
1439085	Bacteria	Chloroflexi	TK10	AKYG885
1342222	Bacteria	Chloroflexi	Anaerolineae	Caldilineales	Caldilineaceae	Caldilinea
1347474	Bacteria	Chloroflexi	Anaerolineae	A31	S47
1352681	Bacteria	Chloroflexi	Anaerolineae	SHA-20
1342916	Bacteria	Chloroflexi	Thermomicrobia	Sphaerobacterales
1344884	Bacteria	Chloroflexi	Anaerolineae	envOPS12
1311995	Bacteria	Chloroflexi	Thermomicrobia	JG30-KF-CM45
1554829	Bacteria	Chloroflexi	Chloroflexi	Chloroflexales	Chloroflexaceae	Chloroflexus
1448644	Bacteria	Chloroflexi	Chloroflexi	Chloroflexales	FFCH7168
1341672	Bacteria	Chloroflexi	Gitt-GS-136
1498589	Bacteria	Chloroflexi	Anaerolineae	Anaerolineales	Anaerolinaceae
1427662	Bacteria	Chloroflexi	SHA-26
1341486	Bacteria	Chloroflexi	Anaerolineae	SBR1031	A4b
1446586	Bacteria	Chloroflexi	Chloroflexi	Roseiflexales
1441451	Bacteria	Chloroflexi	TK10	AKYG885	Dol23
1433105	Bacteria	Chloroflexi	Chloroflexi	Chloroflexales	Chloroflexaceae	Chloronema
1509054	Bacteria	Chloroflexi	Anaerolineae	S0208
1510821	Bacteria	Chloroflexi	Thermomicrobia
1544156	Bacteria	Chloroflexi	Chloroflexi	Chloroflexales	Chlorothrixaceae
1351551	Bacteria	Chloroflexi	Anaerolineae	SBR1031	oc28
1438186	Bacteria	Chloroflexi	TK10	B07_WMSP1
1442636	Bacteria	Chloroflexi	Chloroflexi	Roseiflexales	Kouleothrixaceae	Kouleothrix
1341506	Bacteria	Chloroflexi	Anaerolineae	SBR1031	SJA-101
1566926	Bacteria	Chloroflexi	Ktedonobacteria	B10-SB3A
1428597	Bacteria	Chloroflexi	Ktedonobacteria	Thermogemmatisporales	Thermogemmatisporaceae
1503229	Bacteria	Chloroflexi	Chloroflexi	Herpetosiphonales
1342099	Bacteria	Chloroflexi	TK17	mle1-48
1438651	Bacteria	Chloroflexi	Chloroflexi	Chloroflexales	Chloroflexaceae
1437770	Bacteria	Chloroflexi	Chloroflexi	AKIW781
1313693	Bacteria	Chloroflexi	C0119
1432586	Bacteria	Chloroflexi	Anaerolineae	CFB-26
1432567	Bacteria	Chloroflexi	Chloroflexi	Roseiflexales	Kouleothrixaceae
1341118	Bacteria	Chloroflexi	TK17
1440026	Bacteria	Chloroflexi	Anaerolineae	WCHB1-50
1433370	Bacteria	Chloroflexi	Chloroflexi	Chloroflexales	SBY3720
939844	Bacteria	Chloroflexi	Thermomicrobia	AKYG1722
1437457	Bacteria	Chloroflexi	Chloroflexi	Chloroflexales	Oscillochloridaceae	Oscillochloris
1428196	Bacteria	Chloroflexi	TK10	AKYG885	5B-12
1427548	Bacteria	Chloroflexi	Anaerolineae	Caldilineales	Caldilineaceae
1338016	Bacteria	Chloroflexi	Ktedonobacteria	Ktedonobacterales	Ktedonobacteraceae
1350992	Bacteria	Chloroflexi	Anaerolineae
1310834	Bacteria	Cyanobacteria	Nostocophycideae	Nostocales	Nostocaceae	Nostoc	muscorum
1516247	Bacteria	Cyanobacteria	ML635J-21
1770034	Bacteria	Cyanobacteria	Synechococcophycideae	Pseudanabaenales	Pseudanabaenaceae
1178261	Bacteria	Cyanobacteria	Nostocophycideae	Nostocales	Nostocaceae
1270673	Bacteria	Cyanobacteria	Synechococcophycideae	Pseudanabaenales
1310251	Bacteria	Cyanobacteria	4C0d-2	MLE1-12
1270574	Bacteria	Cyanobacteria	Oscillatoriophycideae	Chroococcales	Xenococcaceae
1444359	Bacteria	Cyanobacteria	4C0d-2	SM1D11
1426319	Bacteria	Cyanobacteria	Nostocophycideae
487308	Bacteria	Cyanobacteria
1342550	Bacteria	Cyanobacteria	Synechococcophycideae	Pseudanabaenales	Pseudanabaenaceae	Leptolyngbya
486337	Bacteria	Cyanobacteria	Oscillatoriophycideae	Oscillatoriales	Phormidiaceae	Phormidium
519264	Bacteria	Elusimicrobia	Elusimicrobia	Elusimicrobiales
338520	Bacteria	Elusimicrobia	Elusimicrobia	IIb
339605	Bacteria	Elusimicrobia	Elusimicrobia	MVP-88
340916	Bacteria	Elusimicrobia	Elusimicrobia	FAC88
1149621	Bacteria	FBP
14222	Bacteria	FCPU426
385539	Bacteria	Fibrobacteres	Fibrobacteria	258ds10
440086	Bacteria	Firmicutes	Clostridia	Clostridiales	Lachnospiraceae
57778	Bacteria	Firmicutes	Bacilli	Bacillales
1348770	Bacteria	Firmicutes	Bacilli	Bacillales	Thermoactinomycetaceae	Shimazuella
943591	Bacteria	Firmicutes	Clostridia	Clostridiales
22067	Bacteria	Firmicutes	Bacilli	Bacillales	Paenibacillaceae
342827	Bacteria	Firmicutes	Bacilli	Bacillales	Paenibacillaceae	Ammoniphilus
75563	Bacteria	Firmicutes	Bacilli	Bacillales	Planococcaceae	Solibacillus
1124412	Bacteria	Firmicutes	Clostridia
1557281	Bacteria	Firmicutes	Clostridia	Clostridiales	Clostridiaceae	Caloramator
1507402	Bacteria	Firmicutes	Clostridia	Clostridiales	Clostridiaceae
1348457	Bacteria	Firmicutes	Clostridia	Clostridiales	Gracilibacteraceae
1446100	Bacteria	Firmicutes	Clostridia	OPB54
14216	Bacteria	Firmicutes	Bacilli	Turicibacterales	Turicibacteraceae	Turicibacter
12924	Bacteria	Firmicutes	Bacilli	Bacillales	Alicyclobacillaceae	Alicyclobacillus
119368	Bacteria	Firmicutes	Bacilli	Bacillales	Paenibacillaceae	Brevibacillus
1554423	Bacteria	Firmicutes	Clostridia	Clostridiales	Clostridiaceae	Oxobacter
25940	Bacteria	Firmicutes	Bacilli	Bacillales	Bacillaceae	Bacillus
1560469	Bacteria	Firmicutes	Clostridia	Clostridiales	Clostridiaceae	Clostridium
2069	Bacteria	Firmicutes	Bacilli	Bacillales	Paenibacillaceae	Paenibacillus	amylolyticus
97090	Bacteria	Firmicutes	Bacilli	Lactobacillales	Streptococcaceae	Streptococcus
1348522	Bacteria	Firmicutes	Clostridia	Clostridiales	Ruminococcaceae
1507520	Bacteria	Firmicutes	Clostridia	Clostridiales	Peptostreptococcaceae	Tepidibacter
54857	Bacteria	Firmicutes	Bacilli	Bacillales	Bacillaceae
78420	Bacteria	Firmicutes	Bacilli	Bacillales	Planococcaceae
1346475	Bacteria	Firmicutes	Clostridia	Clostridiales	Gracilibacteraceae	Gracilibacter
1561745	Bacteria	Firmicutes	Clostridia	Clostridiales	Peptostreptococcaceae
92790	Bacteria	Firmicutes	Bacilli	Bacillales	Planococcaceae	Paenisporosarcina
935303	Bacteria	GAL15
12978	Bacteria	Gemmatimonadetes	Gemm-2
472465	Bacteria	Gemmatimonadetes	Gemm-1
429320	Bacteria	Gemmatimonadetes	Gemmatimonadetes
16868	Bacteria	Gemmatimonadetes	Gemm-3
390374	Bacteria	Gemmatimonadetes	Gemmatimonadetes	Ellin5290
386712	Bacteria	Gemmatimonadetes	Gemmatimonadetes	N1423WL
411859	Bacteria	Gemmatimonadetes	Gemmatimonadetes	Gemmatimonadales
352312	Bacteria	Gemmatimonadetes	Gemmatimonadetes	Gemmatimonadales	Ellin5301
63548	Bacteria	Gemmatimonadetes
413813	Bacteria	Gemmatimonadetes	Gemmatimonadetes	KD8-87
412468	Bacteria	Gemmatimonadetes	Gemmatimonadetes	Gemmatimonadales	Gemmatimonadaceae	Gemmatimonas
446302	Bacteria	Gemmatimonadetes	Gemmatimonadetes	C114
1544	Bacteria	Gemmatimonadetes	Gemm-5
2289341	Bacteria	GN02	BD1-5
1505871	Bacteria	GN02	3BR-5F
2060584	Bacteria	GN02	GKS2-174
1437655	Bacteria	MVP-21
433978	Bacteria	Nitrospirae	Nitrospira	Nitrospirales	Nitrospiraceae
14237	Bacteria	Nitrospirae	Nitrospira	Nitrospirales	0319-6A21
412393	Bacteria	Nitrospirae	Nitrospira	Nitrospirales	Nitrospiraceae	Nitrospira
15864	Bacteria	NKB19
1265396	Bacteria	OD1	ZB2
690743	Bacteria	OD1	SM2F11
1268665	Bacteria	OD1	ABY1
1950208	Bacteria	OD1
1787523	Bacteria	OP11	OP11-3
1750957	Bacteria	OP11	WCHB1-64
1347438	Bacteria	OP11
210273	Bacteria	OP3	PBS-25
339565	Bacteria	Planctomycetes	Phycisphaerae	CPla-3
1432627	Bacteria	Planctomycetes	Pla4
339542	Bacteria	Planctomycetes	Phycisphaerae	Pla1
485999	Bacteria	Planctomycetes	Planctomycetia	Gemmatales	Gemmataceae	Gemmata
1312535	Bacteria	Planctomycetes	Planctomycetia	B97
485035	Bacteria	Planctomycetes	Planctomycetia	Gemmatales	Isosphaeraceae
1349005	Bacteria	Planctomycetes	Phycisphaerae	WD2101
74613	Bacteria	Planctomycetes	BD7-11
1142	Bacteria	Planctomycetes	vadinHA49	p04_C01
387695	Bacteria	Planctomycetes	Planctomycetia	Pirellulales	Pirellulaceae
321003	Bacteria	Planctomycetes	OM190	agg27
323100	Bacteria	Planctomycetes	Planctomycetia	Planctomycetales	Planctomycetaceae	Planctomyces
67101	Bacteria	Planctomycetes	OM190	CL500-15
485955	Bacteria	Planctomycetes	Planctomycetia	Gemmatales	Gemmataceae
308193	Bacteria	Planctomycetes	Planctomycetia	Pirellulales	Pirellulaceae	A17
390213	Bacteria	Planctomycetes
230122	Bacteria	Planctomycetes	C6	MVS-107
1506924	Bacteria	Planctomycetes	Phycisphaerae	Phycisphaerales	Phycisphaeraceae
1500814	Bacteria	Planctomycetes	Phycisphaerae	CCM11a
320871	Bacteria	Planctomycetes	Planctomycetia	Pirellulales	Pirellulaceae	Pirellula
1440166	Bacteria	Planctomycetes	Phycisphaerae	Phycisphaerales
31085	Bacteria	Proteobacteria	Gammaproteobacteria	Alteromonadales	Alteromonadaceae
38612	Bacteria	Proteobacteria	Gammaproteobacteria
14272	Bacteria	Proteobacteria	Deltaproteobacteria	Bdellovibrionales	Bacteriovoracaceae
1437573	Bacteria	Proteobacteria	Alphaproteobacteria	Sphingomonadales	Sphingomonadaceae
29565	Bacteria	Proteobacteria	Deltaproteobacteria	Myxococcales	Polyangiaceae
1429854	Bacteria	Proteobacteria	Alphaproteobacteria	Sphingomonadales	Erythrobacteraceae
32776	Bacteria	Proteobacteria	Gammaproteobacteria	Xanthomonadales	Xanthomonadaceae	Arenimonas
38194	Bacteria	Proteobacteria	Betaproteobacteria	Rhodocyclales	Rhodocyclaceae	Georgfuchsia	toluolica
87088	Bacteria	Proteobacteria	Deltaproteobacteria	Myxococcales
2345	Bacteria	Proteobacteria	Deltaproteobacteria	NB1-j	NB1-i
1692847	Bacteria	Proteobacteria	Deltaproteobacteria	Entotheonellales	Entotheonellaceae	Candidatus_Entotheonella
1439422	Bacteria	Proteobacteria	Alphaproteobacteria	Rhizobiales	Xanthobacteraceae
1444746	Bacteria	Proteobacteria	Alphaproteobacteria	Rhizobiales	Hyphomicrobiaceae	Pedomicrobium
12685	Bacteria	Proteobacteria	Deltaproteobacteria	Myxococcales	Myxococcaceae	Anaeromyxobacter
1533470	Bacteria	Proteobacteria	Alphaproteobacteria	Rhodospirillales	Acetobacteraceae	Roseococcus
1432312	Bacteria	Proteobacteria	Alphaproteobacteria	Rhodobacterales	Hyphomonadaceae
29892	Bacteria	Proteobacteria	Deltaproteobacteria	Myxococcales	Polyangiaceae	Sorangium	cellulosum
459510	Bacteria	Proteobacteria	Betaproteobacteria	Rhodocyclales	Rhodocyclaceae	Azoarcus
1433279	Bacteria	Proteobacteria	Alphaproteobacteria	Rhizobiales	Xanthobacteraceae	Labrys
2966	Bacteria	Proteobacteria	Deltaproteobacteria	Entotheonellales	Entotheonellaceae
1341651	Bacteria	Proteobacteria	Alphaproteobacteria	Rickettsiales	Rickettsiaceae	Rickettsia	Rickettsia_endosymbiont_oDeronecteplatynotus
13817	Bacteria	Proteobacteria	Deltaproteobacteria	MIZ46
74796	Bacteria	Proteobacteria	Gammaproteobacteria	Xanthomonadales	Xanthomonadaceae	Thermomonas
1825	Bacteria	Proteobacteria	Betaproteobacteria	Burkholderiales	Comamonadaceae
1432954	Bacteria	Proteobacteria	Alphaproteobacteria	Rhizobiales	Hyphomicrobiaceae
1440144	Bacteria	Proteobacteria	Alphaproteobacteria	Rhizobiales	Rhodobiaceae	Afifella
1574390	Bacteria	Proteobacteria	Alphaproteobacteria	Rhodospirillales	Acetobacteraceae	Paracraurococcus	ruber
422458	Bacteria	Proteobacteria	Betaproteobacteria	Neisseriales	Neisseriaceae	Vogesella
1351387	Bacteria	Proteobacteria	Alphaproteobacteria	Rhizobiales	Hyphomicrobiaceae	Rhodoplanes
519	Bacteria	Proteobacteria	Gammaproteobacteria	Xanthomonadales	Sinobacteraceae
228931	Bacteria	Proteobacteria	Deltaproteobacteria	Myxococcales	Polyangiaceae	Chondromyces
1548005	Bacteria	Proteobacteria	Alphaproteobacteria	Rhizobiales	Rhizobiaceae	Ensifer	adhaerens
53792	Bacteria	Proteobacteria	Betaproteobacteria	A21b	EB1003
1438661	Bacteria	Proteobacteria	Alphaproteobacteria	Rhodospirillales	Rhodospirillaceae	Phaeospirillum	fulvum
85959	Bacteria	Proteobacteria	Gammaproteobacteria	HTCC2188	HTCC2089
14668	Bacteria	Proteobacteria	Betaproteobacteria	IS-44
1342510	Bacteria	Proteobacteria	Alphaproteobacteria	Caulobacterales	Caulobacteraceae	Arthrospira
1432727	Bacteria	Proteobacteria	Alphaproteobacteria	Rhizobiales	Phyllobacteriaceae	Mesorhizobium
103823	Bacteria	Proteobacteria	Betaproteobacteria	Burkholderiales	Alcaligenaceae	Pigmentiphaga
17385	Bacteria	Proteobacteria	Gammaproteobacteria	Legionellales	Coxiellaceae	Rickettsiella
64050	Bacteria	Proteobacteria	Gammaproteobacteria	Legionellales	Coxiellaceae	Aquicella
2013	Bacteria	Proteobacteria	Betaproteobacteria	Burkholderiales	Burkholderiaceae	Burkholderia
1937	Bacteria	Proteobacteria	Betaproteobacteria	Burkholderiales	Comamonadaceae	Polaromonas
1438783	Bacteria	Proteobacteria	Alphaproteobacteria	Rhodospirillales	Rhodospirillaceae	Inquilinus	limosus
1432690	Bacteria	Proteobacteria	Alphaproteobacteria	Rhizobiales	Bradyrhizobiaceae
25778	Bacteria	Proteobacteria	Gammaproteobacteria	Xanthomonadales	Xanthomonadaceae	Dokdonella
228854	Bacteria	Proteobacteria
1438192	Bacteria	Proteobacteria	Alphaproteobacteria	Sphingomonadales	Sphingomonadaceae	Sphingobium
13781	Bacteria	Proteobacteria	Deltaproteobacteria	Myxococcales	0319-6G20
1448425	Bacteria	Proteobacteria	Alphaproteobacteria	Caulobacterales	Caulobacteraceae	Mycoplana
36734	Bacteria	Proteobacteria	Betaproteobacteria	Burkholderiales	Oxalobacteraceae	Cupriavidus
14437	Bacteria	Proteobacteria	Gammaproteobacteria	Enterobacteriales	Enterobacteriaceae
1565540	Bacteria	Proteobacteria	Alphaproteobacteria	Rhizobiales	Aurantimonadaceae
1347585	Bacteria	Proteobacteria	Alphaproteobacteria	Rhizobiales	Rhizobiaceae	Rhizobium
1589	Bacteria	Proteobacteria	Gammaproteobacteria	Pseudomonadales	Pseudomonadaceae	Pseudomonas	viridiflava
1341837	Bacteria	Proteobacteria	Alphaproteobacteria	Sphingomonadales	Sphingomonadaceae	Novosphingobium
1433962	Bacteria	Proteobacteria	Alphaproteobacteria	Caulobacterales	Caulobacteraceae	Phenylobacterium
70222	Bacteria	Proteobacteria	Gammaproteobacteria	Thiotrichales	Piscirickettsiaceae
28906	Bacteria	Proteobacteria	Gammaproteobacteria	Alteromonadales	Alteromonadaceae	Cellvibrio
30645	Bacteria	Proteobacteria	Gammaproteobacteria	Xanthomonadales	Xanthomonadaceae	Luteimonas
1432803	Bacteria	Proteobacteria	Alphaproteobacteria	Rhizobiales	Hyphomicrobiaceae	Hyphomicrobium
1442909	Bacteria	Proteobacteria	Alphaproteobacteria	Rhizobiales	Rhizobiaceae	Sinorhizobium
1438912	Bacteria	Proteobacteria	Alphaproteobacteria	Caulobacterales
22941	Bacteria	Proteobacteria	Betaproteobacteria	Burkholderiales	Alcaligenaceae	Achromobacter
15342	Bacteria	Proteobacteria	Gammaproteobacteria	Xanthomonadales	Xanthomonadaceae	Luteibacter	rhizovicinus
942409	Bacteria	Proteobacteria	Zetaproteobacteria	Mariprofundales	Mariprofundaceae	Mariprofundus
1432654	Bacteria	Proteobacteria	Alphaproteobacteria	Rhodospirillales	Rhodospirillaceae
26058	Bacteria	Proteobacteria	Betaproteobacteria	A21b	UD5
14554	Bacteria	Proteobacteria	Gammaproteobacteria	Xanthomonadales	Sinobacteraceae	Steroidobacter
26356	Bacteria	Proteobacteria	Betaproteobacteria	Burkholderiales	Comamonadaceae	Ramlibacter
1445081	Bacteria	Proteobacteria	Alphaproteobacteria	Rhizobiales	Bradyrhizobiaceae	Bradyrhizobium
1450951	Bacteria	Proteobacteria	Alphaproteobacteria	Rhizobiales	Phyllobacteriaceae	Thermovum	composti
70109	Bacteria	Proteobacteria	Betaproteobacteria	A21b
32735	Bacteria	Proteobacteria	Betaproteobacteria	SC-I-84
3127	Bacteria	Proteobacteria	Deltaproteobacteria	Syntrophobacterales	Syntrophobacteraceae
28987	Bacteria	Proteobacteria	Gammaproteobacteria	Xanthomonadales	Xanthomonadaceae	Pseudoxanthomonas
1311509	Bacteria	Proteobacteria	Alphaproteobacteria	Rhodospirillales	Rhodospirillaceae	Skermanella
391061	Bacteria	Proteobacteria	Betaproteobacteria	Rhodocyclales	Rhodocyclaceae
1438568	Bacteria	Proteobacteria	Alphaproteobacteria	Caulobacterales	Caulobacteraceae	Caulobacter	henricii
1503673	Bacteria	Proteobacteria	Alphaproteobacteria	Rhizobiales	Aurantimonadaceae	Aurantimonas	altamirensis
20874	Bacteria	Proteobacteria	Gammaproteobacteria	Xanthomonadales	Xanthomonadaceae	Lysobacter
31993	Bacteria	Proteobacteria	Betaproteobacteria	Burkholderiales	Burkholderiaceae
15320	Bacteria	Proteobacteria	Betaproteobacteria	Burkholderiales	Oxalobacteraceae	Janthinobacterium
1439895	Bacteria	Proteobacteria	Alphaproteobacteria	Rhizobiales	Beijerinckiaceae
30570	Bacteria	Proteobacteria	Gammaproteobacteria	Xanthomonadales	Xanthomonadaceae	Aspromonas	composti
64454	Bacteria	Proteobacteria	Gammaproteobacteria	Xanthomonadales	Xanthomonadaceae	Stenotrophomonas	panacihumi
1438765	Bacteria	Proteobacteria	Alphaproteobacteria	Rhizobiales	Methylocystaceae	Methylopila
3283	Bacteria	Proteobacteria	Deltaproteobacteria	FAC87
1433758	Bacteria	Proteobacteria	Alphaproteobacteria	Caulobacterales	Caulobacteraceae
1438264	Bacteria	Proteobacteria	Alphaproteobacteria	Sphingomonadales	Erythrobacteraceae	Lutibacterium
1437090	Bacteria	Proteobacteria	Alphaproteobacteria	Caulobacterales	Caulobacteraceae	Asticcacaulis	biprosthecium
15907	Bacteria	Proteobacteria	Betaproteobacteria	Ellin6067
31275	Bacteria	Proteobacteria	Betaproteobacteria	Burkholderiales	Comamonadaceae	Hydrogenophaga
56945	Bacteria	Proteobacteria	Gammaproteobacteria	Legionellales	Legionellaceae	Legionella
79072	Bacteria	Proteobacteria	Deltaproteobacteria	Myxococcales	Myxococcaceae	Myxococcus
1427276	Bacteria	Proteobacteria	Alphaproteobacteria	Sphingomonadales
24223	Bacteria	Proteobacteria	Betaproteobacteria	Burkholderiales	Comamonadaceae	Limnohabitans
23417	Bacteria	Proteobacteria	Gammaproteobacteria	Legionellales	Legionellaceae	Tatlockia
15892	Bacteria	Proteobacteria	Betaproteobacteria
1432596	Bacteria	Proteobacteria	Alphaproteobacteria	Rickettsiales	Rickettsiaceae
129013	Bacteria	Proteobacteria	Deltaproteobacteria	Myxococcales	Cystobacteraceae	Cystobacter
58479	Bacteria	Proteobacteria	Deltaproteobacteria	NB1-j
150652	Bacteria	Proteobacteria	Betaproteobacteria	Rhodocyclales	Rhodocyclaceae	Uliginosibacterium
1506590	Bacteria	Proteobacteria	Alphaproteobacteria	Rhodobacterales	Rhodobacteraceae
14306	Bacteria	Proteobacteria	Deltaproteobacteria	Spirobacillales
1558724	Bacteria	Proteobacteria	Alphaproteobacteria	BD7-3
1310256	Bacteria	Proteobacteria	Deltaproteobacteria	Myxococcales	OM27
15882	Bacteria	Proteobacteria	Deltaproteobacteria
1312156	Bacteria	Proteobacteria	Alphaproteobacteria	Sphingomonadales	Sphingomonadaceae	Sphingomonas
21941	Bacteria	Proteobacteria	Deltaproteobacteria	NB1-j	MND4
1341941	Bacteria	Proteobacteria	Alphaproteobacteria	Rhizobiales
1437001	Bacteria	Proteobacteria	Alphaproteobacteria	Rhodobacterales	Rhodobacteraceae	Paracoccus
21034	Bacteria	Proteobacteria	Betaproteobacteria	Burkholderiales	Oxalobacteraceae
1438565	Bacteria	Proteobacteria	Alphaproteobacteria	Rickettsiales
263055	Bacteria	Proteobacteria	Deltaproteobacteria	Myxococcales	Polyangiaceae	Aetherobacter	fasciculatus
247767	Bacteria	Proteobacteria	Deltaproteobacteria	Myxococcales	Polyangiaceae	Byssovorax	cruenta
1507638	Bacteria	Proteobacteria	Alphaproteobacteria	Rhizobiales	Methylocystaceae	Pleomorphomonas
16504	Bacteria	Proteobacteria	Betaproteobacteria	Burkholderiales	Comamonadaceae	Methylibium
1444874	Bacteria	Proteobacteria	Alphaproteobacteria	Rhizobiales	Bradyrhizobiaceae	Bosea	genosp.
14290	Bacteria	Proteobacteria	Betaproteobacteria	MND1
22381	Bacteria	Proteobacteria	Betaproteobacteria	Burkholderiales	Comamonadaceae	Azohydromonas
55219	Bacteria	Proteobacteria	Gammaproteobacteria	Enterobacteriales	Enterobacteriaceae	Enterobacter	turicensis
1530638	Bacteria	Proteobacteria	Alphaproteobacteria	Rhizobiales	Rhizobiaceae	Kaistia
325843	Bacteria	Proteobacteria	Deltaproteobacteria	Myxococcales	Nannocystaceae	Nannocystis
1433529	Bacteria	Proteobacteria	Alphaproteobacteria	Rhizobiales	Phyllobacteriaceae
1430874	Bacteria	Proteobacteria	Alphaproteobacteria	Rhizobiales	Rhizobiaceae	Agrobacterium
1568780	Bacteria	Proteobacteria	Alphaproteobacteria	Rhodospirillales	Acetobacteraceae	Rhodovastum	atsumiense
1310423	Bacteria	Proteobacteria	TA18	PHOS-HD29
1508192	Bacteria	Proteobacteria	Alphaproteobacteria	Kiloniellales
119282	Bacteria	Proteobacteria	Gammaproteobacteria	Chromatiales	Ectothiorhodospiraceae
97305	Bacteria	Proteobacteria	Gammaproteobacteria	Legionellales
22252	Bacteria	Proteobacteria	Betaproteobacteria	Methylophilales	Methylophilaceae	Methylotenera	mobilis
21913	Bacteria	Proteobacteria	Betaproteobacteria	Burkholderiales	Comamonadaceae	Hylemonella
1434502	Bacteria	Proteobacteria	Alphaproteobacteria	Rhodospirillales	Acetobacteraceae	Rhodopila	globiformis
1444160	Bacteria	Proteobacteria	Gammaproteobacteria	Oceanospirillales	Alcanivoracaceae	Alcanivorax
126883	Bacteria	Proteobacteria	Deltaproteobacteria	Myxococcales	Cystobacteraceae
1427122	Bacteria	Proteobacteria	Alphaproteobacteria
1426854	Bacteria	Proteobacteria	Alphaproteobacteria	Sphingomonadales	Sphingomonadaceae	Kaistobacter
1269716	Bacteria	Proteobacteria	Deltaproteobacteria	Bdellovibrionales	Bdellovibrionaceae	Bdellovibrio
1432926	Bacteria	Proteobacteria	Alphaproteobacteria	Rhizobiales	Bradyrhizobiaceae	Balneimonas
29492	Bacteria	Proteobacteria	Betaproteobacteria	Burkholderiales	Comamonadaceae	Comamonas
1558	Bacteria	Proteobacteria	Deltaproteobacteria	Myxococcales	Cystobacterineae
339881	Bacteria	Proteobacteria	Deltaproteobacteria	Myxococcales	Nannocystaceae	Plesiocystis
1441811	Bacteria	Proteobacteria	Alphaproteobacteria	Rhodospirillales
50584	Bacteria	Proteobacteria	Deltaproteobacteria	Myxococcales	Myxococcaceae
2454	Bacteria	Proteobacteria	Betaproteobacteria	Burkholderiales	Comamonadaceae	Roseateles	depolymerans
1346811	Bacteria	Proteobacteria	Alphaproteobacteria	Rhodobacterales	Rhodobacteraceae	Rubellimicrobium
1426764	Bacteria	Proteobacteria	Alphaproteobacteria	Rhizobiales	Methylocystaceae	Methylosinus
1312341	Bacteria	Proteobacteria	TA18	CV90
68895	Bacteria	Proteobacteria	Betaproteobacteria	Rhodocyclales	Rhodocyclaceae	Dechloromonas
21121	Bacteria	Proteobacteria	Betaproteobacteria	Burkholderiales	Comamonadaceae	Xenophilus	aerolatus
1507753	Bacteria	Proteobacteria	Gammaproteobacteria	Chromatiales
1509197	Bacteria	Proteobacteria	Alphaproteobacteria	Rhizobiales	Phyllobacteriaceae	Phyllobacterium
50235	Bacteria	Proteobacteria	Betaproteobacteria	Burkholderiales
1438995	Bacteria	Proteobacteria	Alphaproteobacteria	Rhodospirillales	Acetobacteraceae	Roseomonas	aerilata
1433271	Bacteria	Proteobacteria	Alphaproteobacteria	Ellin329
1450386	Bacteria	Proteobacteria	Alphaproteobacteria	Sphingomonadales	Sphingomonadaceae	Sphingopyxis
14700	Bacteria	Proteobacteria	Betaproteobacteria	Nitrosomonadales	Nitrosomonadaceae	Nitrosovibrio	tenuis
74676	Bacteria	Proteobacteria	Deltaproteobacteria	Myxococcales	Haliangiaceae
1440132	Bacteria	Proteobacteria	Alphaproteobacteria	Rhizobiales	Methylocystaceae
1351597	Bacteria	Proteobacteria	Alphaproteobacteria	Rhizobiales	Rhizobiaceae
85803	Bacteria	Proteobacteria	Betaproteobacteria	Methylophilales	Methylophilaceae
132108	Bacteria	Proteobacteria	Deltaproteobacteria	Myxococcales	Haliangiaceae	Haliangium
16601	Bacteria	Proteobacteria	Deltaproteobacteria	Desulfobacterales	Desulfobulbaceae
186572	Bacteria	Proteobacteria	Gammaproteobacteria	Legionellales	Coxiellaceae
52776	Bacteria	Proteobacteria	Deltaproteobacteria	Desulfuromonadales	Geobacteraceae	Geobacter
1490797	Bacteria	Proteobacteria	Alphaproteobacteria	Rhodospirillales	Rhodospirillaceae	Azospirillum
472917	Bacteria	Proteobacteria	Betaproteobacteria	Burkholderiales	Oxalobacteraceae	Massilia	aerolata
63649	Bacteria	Proteobacteria	Betaproteobacteria	Burkholderiales	Alcaligenaceae
1438772	Bacteria	Proteobacteria	Alphaproteobacteria	Rhodospirillales	Acetobacteraceae
3104	Bacteria	Proteobacteria	Gammaproteobacteria	Enterobacteriales	Enterobacteriaceae	Erwinia
1426767	Bacteria	Proteobacteria	Alphaproteobacteria	Rhizobiales	Hyphomicrobiaceae	Devosia
14438	Bacteria	Proteobacteria	Gammaproteobacteria	Alteromonadales	211ds20
105519	Bacteria	Proteobacteria	Deltaproteobacteria	Myxococcales	Polyangiaceae	Polyangium	fumosum
1507324	Bacteria	Proteobacteria	Alphaproteobacteria	Rhodobacterales	Rhodobacteraceae	Amaricoccus
1342993	Bacteria	Proteobacteria	Alphaproteobacteria	Rhizobiales	Methylobacteriaceae	Methylobacterium
30812	Bacteria	Proteobacteria	Gammaproteobacteria	Xanthomonadales	Xanthomonadaceae
1433915	Bacteria	Proteobacteria	Alphaproteobacteria	Rhizobiales	Methylobacteriaceae
1644321	Bacteria	Proteobacteria	Alphaproteobacteria	Rhodospirillales	Rhodospirillaceae	Magnetospirillum
57856	Bacteria	SBR1093
228508	Bacteria	Spirochaetes	Spirochaetes	Spirochaetales	Spirochaetaceae	Spirochaeta	aurantia
2206828	Bacteria	SR1
310826	Bacteria	Tenericutes	Mollicutes	Anaeroplasmatales	Anaeroplasmataceae	Asteroleplasma
486021	Bacteria	Thermi	Deinococci	Deinococcales	Deinococcaceae	Deinococcus
14701	Bacteria	TM6	SJA-4
1310610	Bacteria	TM7	TM7-3
1311751	Bacteria	TM7	TM7-3	I025
1313272	Bacteria	TM7	TM7-3	EW055
1440310	Bacteria	TM7	SC3
1344452	Bacteria	TM7
1341748	Bacteria	TM7	TM7-1
98799	Bacteria	Verrucomicrobia	Spartobacteria	Chthoniobacterales	Chthoniobacteraceae	Ellin506
17354	Bacteria	Verrucomicrobia	Verrucomicrobiae	Verrucomicrobiales	Verrucomicrobiaceae
78335	Bacteria	Verrucomicrobia	Pedosphaerae	Pedosphaerales	Pedosphaeraceae	Pedosphaera
25116	Bacteria	Verrucomicrobia	Verrucomicrobiae	Verrucomicrobiales	Verrucomicrobiaceae	Luteolibacter
2860	Bacteria	Verrucomicrobia	Spartobacteria	Chthoniobacterales	Chthoniobacteraceae	OR-59
70842	Bacteria	Verrucomicrobia	Opitutae	Opitutales	Opitutaceae	Opitutus
14525	Bacteria	Verrucomicrobia	Methylacidiphilae	Methylacidiphilales
98309	Bacteria	Verrucomicrobia	Pedosphaerae	Pedosphaerales	OPB35
246673	Bacteria	Verrucomicrobia	Spartobacteria	Chthoniobacterales	Chthoniobacteraceae	DA101
97497	Bacteria	Verrucomicrobia	Spartobacteria	Chthoniobacterales	Chthoniobacteraceae	Chthoniobacter
241321	Bacteria	Verrucomicrobia	Methylacidiphilae	S-BQ2-57
228980	Bacteria	Verrucomicrobia	Opitutae
69692	Bacteria	Verrucomicrobia	Pedosphaerae	Pedosphaerales	auto67_4W
23387	Bacteria	Verrucomicrobia	Verrucomicrobiae	Verrucomicrobiales	Verrucomicrobiaceae	Prosthecobacter	debontii
23829	Bacteria	Verrucomicrobia	Spartobacteria	Chthoniobacterales	Chthoniobacteraceae
485688	Bacteria	Verrucomicrobia	Spartobacteria	Chthoniobacterales	01D2Z36
122143	Bacteria	Verrucomicrobia	Pedosphaerae	Pedosphaerales
187701	Bacteria	Verrucomicrobia	Pedosphaerae	Pedosphaerales	Ellin515
230491	Bacteria	Verrucomicrobia
96735	Bacteria	Verrucomicrobia	Opitutae	Opitutales	Opitutaceae
1268999	Bacteria	Verrucomicrobia	Spartobacteria	Chthoniobacterales	Chthoniobacteraceae	Candidatus_Xiphinematobacter
31684	Bacteria	Verrucomicrobia	Pedosphaerae	Pedosphaerales	Ellin517
1433134	Bacteria	WPS-2
1432635	Bacteria	WS2	SHA-109
14578	Bacteria	WS3	PRR-12	Sediment-1	PRR-10
25079	Bacteria	WS3	PRR-12	LD1-PA13
12946	Bacteria	WS3	PRR-12	Sediment-1
2057690	Bacteria	WS6	B142
409937	Bacteria

## Sheet: Intersection Soil-Ruderal plants
OTU ID	Kingdom	Phylum	Class	Order	Famiy	Genus	Species
76326	Bacteria	Acidobacteria
1428465	Bacteria	Acidobacteria	Acidobacteriia	Acidobacteriales
1149739	Bacteria	Actinobacteria	Actinobacteria	Actinomycetales	Tsukamurellaceae	Tsukamurella
942949	Bacteria	Actinobacteria	Actinobacteria	Actinomycetales	Actinosynnemataceae	Actinoalloteichus
1428757	Bacteria	Actinobacteria	Actinobacteria	Actinomycetales	Streptosporangiaceae	Planomonospora	venezuelensis
1164015	Bacteria	Actinobacteria	Actinobacteria	Actinomycetales	Actinomycetaceae	Candidatus_Ancillula
691223	Bacteria	Actinobacteria	Actinobacteria	Actinomycetales	Dermatophilaceae	Kineosphaera	limosa
473739	Bacteria	Actinobacteria	Actinobacteria	Actinomycetales	Promicromonosporaceae
1241183	Bacteria	Actinobacteria	Actinobacteria	Actinomycetales	Brevibacteriaceae	Brevibacterium
692644	Bacteria	Actinobacteria	Actinobacteria	Actinomycetales	Nocardioidaceae	Friedmanniella
472638	Bacteria	Actinobacteria	Actinobacteria	Actinomycetales	Microbacteriaceae	Pseudoclavibacter	bifida
35332	Bacteria	Actinobacteria	Thermoleophilia	Solirubrobacterales	Patulibacteraceae	Patulibacter
694520	Bacteria	Actinobacteria	Actinobacteria	Actinomycetales	Micrococcaceae	Micrococcus
1125124	Bacteria	Actinobacteria	Actinobacteria	Actinomycetales	Dermabacteraceae
1131137	Bacteria	Actinobacteria	Actinobacteria	Actinomycetales	Beutenbergiaceae
1129403	Bacteria	Actinobacteria	Actinobacteria	Actinomycetales	Micromonosporaceae	Actinocatenispora
1133227	Bacteria	Actinobacteria	Actinobacteria	Actinomycetales	Microbacteriaceae	Leucobacter
1240959	Bacteria	Actinobacteria	Actinobacteria	Actinomycetales	Frankiaceae	Kaistibacter	ginsenosidimutans
1898673	Bacteria	Actinobacteria	Actinobacteria	Actinomycetales	Tsukamurellaceae
936227	Bacteria	Actinobacteria	Actinobacteria	Actinomycetales	Micromonosporaceae	Solwaraspora
1440480	Bacteria	Actinobacteria	Actinobacteria	Actinomycetales	Pseudonocardiaceae	Prauserella	rugosa
1366848	Bacteria	Bacteroidetes	Bacteroidia	Bacteroidales	Porphyromonadaceae	Dysgonomonas	gadei
381345	Bacteria	Bacteroidetes	Saprospirae	Saprospirales	Chitinophagaceae	Terrimonas
354780	Bacteria	Bacteroidetes	Flavobacteriia	Flavobacteriales	Weeksellaceae	Elizabethkingia	meningoseptica
341352	Bacteria	Bacteroidetes	Sphingobacteriia	Sphingobacteriales	Sphingobacteriaceae	Sphingobacterium	multivorum
387030	Bacteria	Bacteroidetes	Cytophagia	Cytophagales	Flammeovirgaceae	Fulvivirga
69235	Bacteria	Chlamydiae	Chlamydiia	Chlamydiales	Criblamydiaceae
1448451	Bacteria	Chloroflexi	Anaerolineae	A31
1342747	Bacteria	Chloroflexi	Thermobacula	Thermobaculales	Thermobaculaceae	Thermobaculum
1641870	Bacteria	Chloroflexi	Chloroflexi	Chloroflexales	01D2Z48
1340903	Bacteria	Cyanobacteria	Nostocophycideae	Nostocales	Nostocaceae	Anabaena
2172940	Bacteria	Firmicutes	Clostridia	Natranaerobiales	ML1228J-1
32280	Bacteria	Firmicutes	Bacilli	Bacillales	Planococcaceae	Sporosarcina
72737	Bacteria	Firmicutes	Bacilli	Bacillales	Planococcaceae	Lysinibacillus	boronitolerans
1523095	Bacteria	Firmicutes	Bacilli	Lactobacillales	Carnobacteriaceae	Trichococcus
190656	Bacteria	Firmicutes	Bacilli	Bacillales	Bacillaceae	Ornithinibacillus	scapharcae
24501	Bacteria	Firmicutes	Bacilli	Lactobacillales	Streptococcaceae	Lactococcus
231712	Bacteria	Firmicutes	Bacilli	Bacillales	Paenibacillaceae	Cohnella
407156	Bacteria	Firmicutes	Bacilli	Bacillales	Exiguobacteraceae	Exiguobacterium
342576	Bacteria	Firmicutes	Clostridia	Halanaerobiales	Halobacteroidaceae	Halanaerobacter
1310550	Bacteria	Firmicutes	Clostridia	Clostridiales	EtOH8
195881	Bacteria	Firmicutes	Clostridia	Clostridiales	Symbiobacteriaceae	Symbiobacterium
1560992	Bacteria	Nitrospirae	Nitrospira	Nitrospirales	Thermodesulfovibrionaceae
1269337	Bacteria	OD1	Mb-NB09
1694540	Bacteria	Planctomycetes	Phycisphaerae	AKAU3564
307766	Bacteria	Planctomycetes	Phycisphaerae	mle1-8
14954	Bacteria	Proteobacteria	Gammaproteobacteria	Alteromonadales	OM60
1495562	Bacteria	Proteobacteria	Alphaproteobacteria	Rhizobiales	Xanthobacteraceae	Blastochloris
324361	Bacteria	Proteobacteria	Deltaproteobacteria	Thermodesulfobacteriales	Thermodesulfobacteriaceae	Thermodesulfatator
1554082	Bacteria	Proteobacteria	Alphaproteobacteria	Rhizobiales	Brucellaceae	Ochrobactrum
171279	Bacteria	Proteobacteria	Deltaproteobacteria	Desulfovibrionales	Desulfomicrobiaceae
243692	Bacteria	Proteobacteria	Deltaproteobacteria	Myxococcales	Myxococcaceae	Corallococcus	exiguus
3105	Bacteria	Proteobacteria	Gammaproteobacteria	Pseudomonadales	Moraxellaceae	Acinetobacter
30459	Bacteria	Proteobacteria	Betaproteobacteria	Rhodocyclales	Rhodocyclaceae	KD1-23
1539381	Bacteria	Proteobacteria	Alphaproteobacteria	Rhizobiales	Phyllobacteriaceae	Chelativorans
108836	Bacteria	Proteobacteria	Betaproteobacteria	Rhodocyclales	Rhodocyclaceae	Candidatus_Accumulibacter
286355	Bacteria	Proteobacteria	Betaproteobacteria	Neisseriales	Neisseriaceae	Pseudogulbenkiania	subflava
1510794	Bacteria	Proteobacteria	Alphaproteobacteria	Rhodospirillales	Acetobacteraceae	Belnapia	moabensis
69091	Bacteria	Proteobacteria	Gammaproteobacteria	Aeromonadales	Aeromonadaceae	Aeromonas	hydrophila
1430979	Bacteria	Proteobacteria	Deltaproteobacteria	Syntrophobacterales	Syntrophaceae
74264	Bacteria	Proteobacteria	Gammaproteobacteria	34P16
86151	Bacteria	Proteobacteria	Gammaproteobacteria	Chromatiales	Chromatiaceae
187511	Bacteria	Proteobacteria	Betaproteobacteria	Burkholderiales	Comamonadaceae	Alicycliphilus
410942	Bacteria	Spirochaetes	GN05
69409	Bacteria	TM6	SBRH58
13945	Bacteria	Verrucomicrobia	Methylacidiphilae	Methylacidiphilales	LD19
231700	Bacteria	Verrucomicrobia	Pedosphaerae	Pedosphaerales	Pedosphaeraceae
360507	Bacteria	Verrucomicrobia	Opitutae	Cerasicoccales	Cerasicoccaceae

## Sheet: Intersection Soil-tomato
OTU ID	Kingdom	Phylum	Class	Order	Famiy	Genus	Species
782281	Bacteria	Proteobacteria	Gammaproteobacteria	Legionellales	Coxiellaceae	Coxiella
2058458	Bacteria	Cyanobacteria	Oscillatoriophycideae	Oscillatoriales	Phormidiaceae
2101812	Bacteria	Cyanobacteria	Nostocophycideae	Nostocales	Scytonemataceae
2160432	Bacteria	Firmicutes	Bacilli	Lactobacillales	Streptococcaceae

## Sheet: Intersection tomato-Ruderal plants
OTU ID	Kingdom	Phylum	Class	Order	Famiy	Genus	Species
184576	Bacteria	Acidobacteria	Holophagae	Holophagales	Holophagaceae
1565217	Bacteria	Acidobacteria	Solibacteres	Solibacterales	Bryobacteraceae	Bryobacter
1630163	Bacteria	Actinobacteria	Actinobacteria	Actinomycetales	Thermomonosporaceae	Spirillospora	rubra
1150928	Bacteria	Actinobacteria	Actinobacteria	Actinomycetales	Propionibacteriaceae	Propionibacterium	acnes
1145495	Bacteria	Actinobacteria	Actinobacteria	Actinomycetales	Sanguibacteraceae	Sanguibacter
1127888	Bacteria	Actinobacteria	Actinobacteria	Actinomycetales	Microbacteriaceae	Clavibacter
941397	Bacteria	Actinobacteria	Actinobacteria	Actinomycetales	Pseudonocardiaceae	Saccharomonospora
2286557	Bacteria	Actinobacteria	Acidimicrobiia	Acidimicrobiales	Acidimicrobiaceae
1437475	Bacteria	Actinobacteria	Acidimicrobiia	Acidimicrobiales	Iamiaceae
691584	Bacteria	Actinobacteria	Actinobacteria	Actinomycetales	Frankiaceae	Actinomycetales	Ellin122
2090145	Bacteria	Armatimonadetes	Armatimonadia	Armatimonadales	Armatimonadaceae	Armatimonas
1311616	Bacteria	Armatimonadetes	Chthonomonadetes	Chthonomonadales	Chthonomonadaceae	Chthonomonas
1346103	Bacteria	Armatimonadetes	Fimbriimonadia	Fimbriimonadales
1311457	Bacteria	Armatimonadetes
320978	Bacteria	Bacteroidetes	Cytophagia	Cytophagales	Cytophagaceae	Emticicia
411030	Bacteria	Bacteroidetes	Rhodothermi	Rhodothermales	Rhodothermaceae
395413	Bacteria	Bacteroidetes	Cytophagia	Cytophagales	Flammeovirgaceae
1438650	Bacteria	Bacteroidetes	Rhodothermi	Rhodothermales	Rhodothermaceae	Salinibacter
1360235	Bacteria	Bacteroidetes	Saprospirae	Saprospirales	Chitinophagaceae	Ferruginibacter	lapsinanis
395882	Bacteria	Bacteroidetes	Cytophagia	Cytophagales	Amoebophilaceae	SC3-56
360086	Bacteria	Bacteroidetes	Saprospirae	Saprospirales	Chitinophagaceae	Parasegitibacter	luojiensis
342960	Bacteria	Bacteroidetes	Cytophagia	Cytophagales	Cytophagaceae	Leadbetterella
351340	Bacteria	Bacteroidetes	Cytophagia	Cytophagales	Cytophagaceae	Runella
365807	Bacteria	Bacteroidetes	Saprospirae	Saprospirales	Saprospiraceae	Haliscomenobacter
387137	Bacteria	Bacteroidetes	Cytophagia	Cytophagales	Cytophagaceae	Pontibacter
351560	Bacteria	Bacteroidetes	BME43
354503	Bacteria	Bacteroidetes	Saprospirae	Saprospirales	Chitinophagaceae	Niabella
1323271	Bacteria	Bacteroidetes	Saprospirae	Saprospirales	Saprospiraceae	Saprospira
548538	Bacteria	Chlamydiae	Chlamydiia	Chlamydiales	Waddliaceae
2078	Bacteria	Chlamydiae	Chlamydiia	Chlamydiales	Chlamydiaceae
211802	Bacteria	Chlamydiae	Chlamydiia	Chlamydiales	Parachlamydiaceae	Parachlamydia
1507007	Bacteria	Chloroflexi	Chloroflexi	Chloroflexales	Chlorothrixaceae	Candidatus_Chlorothrix
1530668	Bacteria	Chloroflexi	Chloroflexi	Chloroflexales
1351529	Bacteria	Cyanobacteria	Synechococcophycideae	Pseudanabaenales	Pseudanabaenaceae	Arthronema
1337647	Bacteria	Cyanobacteria	Nostocophycideae	Nostocales	Scytonemataceae	Scytonema
2068237	Bacteria	Cyanobacteria	Nostocophycideae	Nostocales	Nostocaceae	Gloeotrichia
1439991	Bacteria	Cyanobacteria	Synechococcophycideae	Synechococcales	Acaryochloridaceae	Acaryochloris
1313435	Bacteria	Cyanobacteria	Oscillatoriophycideae	Oscillatoriales	Phormidiaceae	Oscillatoria
1594087	Bacteria	Cyanobacteria	4C0d-2	YS2
1270700	Bacteria	Cyanobacteria	Nostocophycideae	Nostocales	Nostocaceae	Dolichospermum	flos-aquae
1314855	Bacteria	Cyanobacteria	Nostocophycideae	Nostocales
1440062	Bacteria	Firmicutes	Bacilli	Bacillales	Pasteuriaceae	Pasteuria
2071249	Bacteria	Firmicutes	Clostridia	Clostridiales	Peptococcaceae	Desulfosporosinus
1242832	Bacteria	Firmicutes	Clostridia	Clostridiales	Peptococcaceae	Desulfotomaculum
341325	Bacteria	Firmicutes	Clostridia	Clostridiales	Peptococcaceae	Pelotomaculum
1530020	Bacteria	Firmicutes	Clostridia	Clostridiales	Christensenellaceae
2067335	Bacteria	Firmicutes	Clostridia	Clostridiales	Peptococcaceae
30799	Bacteria	Firmicutes	Clostridia	Clostridiales	Veillonellaceae
1348172	Bacteria	Firmicutes	Clostridia	Clostridiales	Lachnospiraceae	Epulopiscium
17921	Bacteria	Firmicutes	Clostridia	Clostridiales	Veillonellaceae	Pelosinus
360458	Bacteria	Firmicutes	Bacilli	Bacillales	Staphylococcaceae	Staphylococcus	sciuri
1747447	Bacteria	Firmicutes	Clostridia	Clostridiales	Tissierellaceae	Anaerococcus
1345218	Bacteria	Firmicutes	Clostridia	Clostridiales	Mogibacteriaceae	Anaerovorax
1442454	Bacteria	Firmicutes	Clostridia	Clostridiales	Lachnospiraceae	Coprococcus
1447228	Bacteria	Fusobacteria	Fusobacteriia	Fusobacteriales
1445626	Bacteria	GN02
1269447	Bacteria	GN02	IIB17
1591305	Bacteria	Kazan-3B-28
21900	Bacteria	Lentisphaerae	Lentisphaeria	Lentisphaerales
65063	Bacteria	NKB19	TSBW08
1802541	Bacteria	OP11	OP11-4
1347373	Bacteria	OP11	WCHB1-64	d153
229483	Bacteria	OP3	koll11
122097	Bacteria	Planctomycetes	vadinHA49	DH61
308817	Bacteria	Planctomycetes	028H05-P-BN-P5
240558	Bacteria	Planctomycetes	OM190
385439	Bacteria	Planctomycetes	Planctomycetia	Gemmatales	Isosphaeraceae	Isosphaera
1514808	Bacteria	Proteobacteria	Alphaproteobacteria	Rhizobiales	Beijerinckiaceae	Methylovirgula	ligni
114596	Bacteria	Proteobacteria	Betaproteobacteria	Burkholderiales	Comamonadaceae	Mitsuaria	chitosanitabida
69631	Bacteria	Proteobacteria	Gammaproteobacteria	Legionellales	Legionellaceae
97214	Bacteria	Proteobacteria	Betaproteobacteria	Procabacteriales	Procabacteriaceae
1843250	Bacteria	Proteobacteria	Deltaproteobacteria	Syntrophobacterales	Syntrophaceae	Desulfobacca
617470	Bacteria	Proteobacteria	Deltaproteobacteria	Desulfuromonadales	Pelobacteraceae
80736	Bacteria	Proteobacteria	Betaproteobacteria	Rhodocyclales	Rhodocyclaceae	Propionivibrio
64304	Bacteria	Proteobacteria	Betaproteobacteria	Burkholderiales	Comamonadaceae	Acidovorax
1449357	Bacteria	Proteobacteria	Alphaproteobacteria	Rhizobiales	Rhizobiaceae	Shinella
1583542	Bacteria	Proteobacteria	Alphaproteobacteria	Rickettsiales	Rickettsiaceae	Wolbachia
101412	Bacteria	Proteobacteria	Betaproteobacteria	Burkholderiales	Comamonadaceae	Rhodoferax
12512	Bacteria	Proteobacteria	Betaproteobacteria	Burkholderiales	Oxalobacteraceae	Herbaspirillum
1509292	Bacteria	Proteobacteria	Alphaproteobacteria	Rhodobacterales	Rhodobacteraceae	Rhodobacter
23345	Bacteria	Proteobacteria	Gammaproteobacteria	Pseudomonadales	Moraxellaceae	Enhydrobacter
241288	Bacteria	Proteobacteria	Deltaproteobacteria	Bdellovibrionales	Bdellovibrionaceae
87865	Bacteria	Proteobacteria	Deltaproteobacteria	Myxococcales	Polyangiaceae	Phaselicystis	flava
262921	Bacteria	Proteobacteria	Gammaproteobacteria	Xanthomonadales	Sinobacteraceae	Nevskia
1544425	Bacteria	Proteobacteria	Alphaproteobacteria	Rickettsiales	Rickettsiaceae	Cryptoprodotis	polytropus
222419	Bacteria	Proteobacteria	Betaproteobacteria	ASSO-13
693579	Bacteria	Proteobacteria	Betaproteobacteria	Burkholderiales	Comamonadaceae	Paucibacter
23872	Bacteria	Proteobacteria	Gammaproteobacteria	Xanthomonadales	Xanthomonadaceae	Xanthomonas
1571860	Bacteria	Proteobacteria	Deltaproteobacteria	Desulfovibrionales	Desulfomicrobiaceae	Desulfomicrobium
153651	Bacteria	Proteobacteria	Gammaproteobacteria	Oceanospirillales	Oleiphilaceae
1510382	Bacteria	Proteobacteria	Alphaproteobacteria	Caulobacterales	Caulobacteraceae	Brevundimonas	poindexterae
1531409	Bacteria	Proteobacteria	Alphaproteobacteria	Sphingomonadales	Erythrobacteraceae	Altererythrobacter	luteolus
62772	Bacteria	Proteobacteria	Betaproteobacteria	Burkholderiales	Comamonadaceae	Leptothrix
1442106	Bacteria	Proteobacteria	Gammaproteobacteria	Chromatiales	Chromatiaceae	Thiocapsa
50939	Bacteria	Proteobacteria	Gammaproteobacteria	Xanthomonadales	Xanthomonadaceae	Dyella
1644380	Bacteria	Proteobacteria	Alphaproteobacteria	Rhizobiales	Methylocystaceae	Rhodoblastus	acidophilus
934924	Bacteria	Proteobacteria	Gammaproteobacteria	Thiotrichales	Thiotrichaceae
64309	Bacteria	Proteobacteria	Gammaproteobacteria	Xanthomonadales	Xanthomonadaceae	Rhodanobacter	lindaniclasticus
1131320	Bacteria	Proteobacteria	Alphaproteobacteria	Rhizobiales	Bartonellaceae
1504267	Bacteria	Proteobacteria	Alphaproteobacteria	Rhizobiales	Rhodobiaceae
1510216	Bacteria	Proteobacteria	Alphaproteobacteria	Sphingomonadales	Erythrobacteraceae	Erythrobacter
1346588	Bacteria	Proteobacteria	Epsilonproteobacteria	Campylobacterales	Helicobacteraceae
68823	Bacteria	Proteobacteria	Gammaproteobacteria	Alteromonadales	125ds10
1437162	Bacteria	Proteobacteria	Gammaproteobacteria	Pseudomonadales	Pseudomonadaceae
53621	Bacteria	Proteobacteria	Betaproteobacteria	Burkholderiales	Oxalobacteraceae	Ralstonia
1630159	Bacteria	Proteobacteria	Alphaproteobacteria	Rhizobiales	Rhizobiaceae	Prosthecomicrobium	pneumaticum
1145501	Bacteria	Proteobacteria	Gammaproteobacteria	Acidithiobacillales
255749	Bacteria	Proteobacteria	Deltaproteobacteria	PB19
1512060	Bacteria	Proteobacteria	Alphaproteobacteria	Rhizobiales	Beijerinckiaceae	Chelatococcus	asaccharovorans
156057	Bacteria	Proteobacteria	Deltaproteobacteria	Desulfuromonadales	Desulfuromonadaceae
70774	Bacteria	Proteobacteria	Betaproteobacteria	Methylophilales
1662520	Bacteria	Proteobacteria	Alphaproteobacteria	Sphingomonadales	Sphingomonadaceae	Sphingosinicella	microcystinivorans
1162724	Bacteria	Proteobacteria	Alphaproteobacteria	Sphingomonadales	Sphingomonadaceae	Blastomonas	natatoria
53735	Bacteria	Proteobacteria	Gammaproteobacteria	Pseudomonadales	Moraxellaceae	Perlucidibaca
120025	Bacteria	Proteobacteria	Betaproteobacteria	Burkholderiales	Comamonadaceae	Delftia
23546	Bacteria	Proteobacteria	Betaproteobacteria	Burkholderiales	Comamonadaceae	Rubrivivax
1340168	Bacteria	Proteobacteria	Deltaproteobacteria	Syntrophobacterales	Syntrophorhabdaceae
89582	Bacteria	Proteobacteria	Deltaproteobacteria	Syntrophobacterales	Syntrophaceae	Desulfomonile
1128444	Bacteria	Proteobacteria	Alphaproteobacteria	Rhizobiales	Phyllobacteriaceae	Aminobacter
118884	Bacteria	Proteobacteria	Betaproteobacteria	Burkholderiales	Comamonadaceae	Aquincola	tertiaricarbonis
942546	Bacteria	Proteobacteria	Gammaproteobacteria	Xanthomonadales	Xanthomonadaceae	Fulvimonas	soli
1574087	Bacteria	Proteobacteria	Alphaproteobacteria	Rhizobiales	Hyphomicrobiaceae	Parvibaculum
68812	Bacteria	Proteobacteria	Betaproteobacteria	Nitrosomonadales	Nitrosomonadaceae	Nitrosomonas	cryotolerans
74215	Bacteria	Proteobacteria	Betaproteobacteria	Nitrosomonadales	Nitrosomonadaceae
130436	Bacteria	Proteobacteria	Gammaproteobacteria	Alteromonadales	Chromatiaceae
118580	Bacteria	Proteobacteria	Betaproteobacteria	Burkholderiales	Comamonadaceae	Variovorax
86322	Bacteria	Proteobacteria	Deltaproteobacteria	Bdellovibrionales	Bacteriovoracaceae	Peredibacter	starrii
72631	Bacteria	Proteobacteria	Betaproteobacteria	Burkholderiales	Oxalobacteraceae	Collimonas
70053	Bacteria	Proteobacteria	Gammaproteobacteria	Pseudomonadales	Moraxellaceae
305808	Bacteria	Spirochaetes	Leptospirae	Leptospirales	Leptospiraceae	Turneriella
486548	Bacteria	Thermi	Deinococci	Deinococcales	Deinococcaceae	CM44
1312488	Bacteria	Thermi	Deinococci	Deinococcales	Trueperaceae	B-42
1747280	Bacteria	Thermi	Deinococci	Deinococcales	Trueperaceae
1694356	Bacteria	Thermi	Deinococci	Deinococcales	Trueperaceae	Truepera
2186420	Bacteria	TM7	MJK10
249505	Bacteria	Verrucomicrobia	Pedosphaerae	Pedosphaerales	R4-41B
473122	Bacteria	Verrucomicrobia	Spartobacteria	Chthoniobacterales	Chthoniobacteraceae	heteroC45_4W
304462	Bacteria	Verrucomicrobia	Pedosphaerae
307026	Bacteria	WS2	Kazan-3B-09
3199	Bacteria	WS3	PRR-12
1579051	Bacteria	WS4
2074977	Bacteria	WS6	SC72	WCHB1-15
1505193	Bacteria	WS6
