# Supplementary material for: Testing the Two-Step Model of Plant Root Microbiome Acquisition Under Multiple Plant Species and Soil Sources
Source: Front Microbiol. 2020 Oct 9;11:542742. doi: 10.3389/fmicb.2020.542742 (PMC7581803; doi:10.3389/fmicb.2020.542742)
Supplement: Supplementary file 5 [file Table_4.XLSX]

## Sheet: cophenetic_weighted
	ZAC1SI	ZAC1RF	ZAC1US	ZAC1SF	ZAC1ECT	NAY3ECT	NAY3RF	NAY2ECT	JAL3ECT	NAY2RF	NAY2SI	NAY2SF	NAY2US	NAY3SI	NAY3SF	NAY3US	JAL3SI	JAL3RF	JAL3SF	JAL3US	JAL1SI	JAL4SI	JAL4ECT	JAL4RF	JAL4SF	JAL4US	SLP1SI	SLP1US	SLP1RF	SLP1ECT	JAL5SI	JAL5RF	JAL5ECT	JAL5SF	JAL5US	JAL1RF	JAL1SF	JAL1US	SLP1SF	AGS1SI	AGS1US	DGO1SI	DGO1RF	DGO1US	DGO1SF	SIN2RF	SIN2ECT	SIN2SI	SIN2US
ZAC1SI	0	0.690215	0.690215	0.690215	0.818739	0.818739	0.818739	0.818739	0.818739	0.882068	0.882068	0.882068	0.882068	0.882068	0.882068	0.882068	0.882068	0.882068	0.882068	0.882068	0.882068	0.882068	0.882068	0.882068	0.882068	0.882068	0.882068	0.882068	0.882068	0.882068	0.882068	0.882068	0.882068	0.882068	0.882068	0.882068	0.882068	0.882068	0.882068	0.882068	0.882068	0.882068	0.882068	0.882068	0.882068	0.882068	0.882068	0.882068	0.882068
ZAC1RF	0.690215	0	0.646575	0.646575	0.818739	0.818739	0.818739	0.818739	0.818739	0.882068	0.882068	0.882068	0.882068	0.882068	0.882068	0.882068	0.882068	0.882068	0.882068	0.882068	0.882068	0.882068	0.882068	0.882068	0.882068	0.882068	0.882068	0.882068	0.882068	0.882068	0.882068	0.882068	0.882068	0.882068	0.882068	0.882068	0.882068	0.882068	0.882068	0.882068	0.882068	0.882068	0.882068	0.882068	0.882068	0.882068	0.882068	0.882068	0.882068
ZAC1US	0.690215	0.646575	0	0.541704	0.818739	0.818739	0.818739	0.818739	0.818739	0.882068	0.882068	0.882068	0.882068	0.882068	0.882068	0.882068	0.882068	0.882068	0.882068	0.882068	0.882068	0.882068	0.882068	0.882068	0.882068	0.882068	0.882068	0.882068	0.882068	0.882068	0.882068	0.882068	0.882068	0.882068	0.882068	0.882068	0.882068	0.882068	0.882068	0.882068	0.882068	0.882068	0.882068	0.882068	0.882068	0.882068	0.882068	0.882068	0.882068
ZAC1SF	0.690215	0.646575	0.541704	0	0.818739	0.818739	0.818739	0.818739	0.818739	0.882068	0.882068	0.882068	0.882068	0.882068	0.882068	0.882068	0.882068	0.882068	0.882068	0.882068	0.882068	0.882068	0.882068	0.882068	0.882068	0.882068	0.882068	0.882068	0.882068	0.882068	0.882068	0.882068	0.882068	0.882068	0.882068	0.882068	0.882068	0.882068	0.882068	0.882068	0.882068	0.882068	0.882068	0.882068	0.882068	0.882068	0.882068	0.882068	0.882068
ZAC1ECT	0.818739	0.818739	0.818739	0.818739	0	0.674669	0.674669	0.730846	0.730846	0.882068	0.882068	0.882068	0.882068	0.882068	0.882068	0.882068	0.882068	0.882068	0.882068	0.882068	0.882068	0.882068	0.882068	0.882068	0.882068	0.882068	0.882068	0.882068	0.882068	0.882068	0.882068	0.882068	0.882068	0.882068	0.882068	0.882068	0.882068	0.882068	0.882068	0.882068	0.882068	0.882068	0.882068	0.882068	0.882068	0.882068	0.882068	0.882068	0.882068
NAY3ECT	0.818739	0.818739	0.818739	0.818739	0.674669	0	0.654916	0.730846	0.730846	0.882068	0.882068	0.882068	0.882068	0.882068	0.882068	0.882068	0.882068	0.882068	0.882068	0.882068	0.882068	0.882068	0.882068	0.882068	0.882068	0.882068	0.882068	0.882068	0.882068	0.882068	0.882068	0.882068	0.882068	0.882068	0.882068	0.882068	0.882068	0.882068	0.882068	0.882068	0.882068	0.882068	0.882068	0.882068	0.882068	0.882068	0.882068	0.882068	0.882068
NAY3RF	0.818739	0.818739	0.818739	0.818739	0.674669	0.654916	0	0.730846	0.730846	0.882068	0.882068	0.882068	0.882068	0.882068	0.882068	0.882068	0.882068	0.882068	0.882068	0.882068	0.882068	0.882068	0.882068	0.882068	0.882068	0.882068	0.882068	0.882068	0.882068	0.882068	0.882068	0.882068	0.882068	0.882068	0.882068	0.882068	0.882068	0.882068	0.882068	0.882068	0.882068	0.882068	0.882068	0.882068	0.882068	0.882068	0.882068	0.882068	0.882068
NAY2ECT	0.818739	0.818739	0.818739	0.818739	0.730846	0.730846	0.730846	0	0.696855	0.882068	0.882068	0.882068	0.882068	0.882068	0.882068	0.882068	0.882068	0.882068	0.882068	0.882068	0.882068	0.882068	0.882068	0.882068	0.882068	0.882068	0.882068	0.882068	0.882068	0.882068	0.882068	0.882068	0.882068	0.882068	0.882068	0.882068	0.882068	0.882068	0.882068	0.882068	0.882068	0.882068	0.882068	0.882068	0.882068	0.882068	0.882068	0.882068	0.882068
JAL3ECT	0.818739	0.818739	0.818739	0.818739	0.730846	0.730846	0.730846	0.696855	0	0.882068	0.882068	0.882068	0.882068	0.882068	0.882068	0.882068	0.882068	0.882068	0.882068	0.882068	0.882068	0.882068	0.882068	0.882068	0.882068	0.882068	0.882068	0.882068	0.882068	0.882068	0.882068	0.882068	0.882068	0.882068	0.882068	0.882068	0.882068	0.882068	0.882068	0.882068	0.882068	0.882068	0.882068	0.882068	0.882068	0.882068	0.882068	0.882068	0.882068
NAY2RF	0.882068	0.882068	0.882068	0.882068	0.882068	0.882068	0.882068	0.882068	0.882068	0	0.614717	0.614717	0.614717	0.685213	0.685213	0.685213	0.773007	0.773007	0.773007	0.773007	0.773007	0.773007	0.837008	0.837008	0.837008	0.837008	0.837008	0.837008	0.837008	0.837008	0.837008	0.837008	0.837008	0.837008	0.837008	0.837008	0.837008	0.837008	0.837008	0.837008	0.837008	0.837008	0.837008	0.837008	0.837008	0.837008	0.837008	0.837008	0.837008
NAY2SI	0.882068	0.882068	0.882068	0.882068	0.882068	0.882068	0.882068	0.882068	0.882068	0.614717	0	0.582668	0.582668	0.685213	0.685213	0.685213	0.773007	0.773007	0.773007	0.773007	0.773007	0.773007	0.837008	0.837008	0.837008	0.837008	0.837008	0.837008	0.837008	0.837008	0.837008	0.837008	0.837008	0.837008	0.837008	0.837008	0.837008	0.837008	0.837008	0.837008	0.837008	0.837008	0.837008	0.837008	0.837008	0.837008	0.837008	0.837008	0.837008
NAY2SF	0.882068	0.882068	0.882068	0.882068	0.882068	0.882068	0.882068	0.882068	0.882068	0.614717	0.582668	0	0.553059	0.685213	0.685213	0.685213	0.773007	0.773007	0.773007	0.773007	0.773007	0.773007	0.837008	0.837008	0.837008	0.837008	0.837008	0.837008	0.837008	0.837008	0.837008	0.837008	0.837008	0.837008	0.837008	0.837008	0.837008	0.837008	0.837008	0.837008	0.837008	0.837008	0.837008	0.837008	0.837008	0.837008	0.837008	0.837008	0.837008
NAY2US	0.882068	0.882068	0.882068	0.882068	0.882068	0.882068	0.882068	0.882068	0.882068	0.614717	0.582668	0.553059	0	0.685213	0.685213	0.685213	0.773007	0.773007	0.773007	0.773007	0.773007	0.773007	0.837008	0.837008	0.837008	0.837008	0.837008	0.837008	0.837008	0.837008	0.837008	0.837008	0.837008	0.837008	0.837008	0.837008	0.837008	0.837008	0.837008	0.837008	0.837008	0.837008	0.837008	0.837008	0.837008	0.837008	0.837008	0.837008	0.837008
NAY3SI	0.882068	0.882068	0.882068	0.882068	0.882068	0.882068	0.882068	0.882068	0.882068	0.685213	0.685213	0.685213	0.685213	0	0.641655	0.641655	0.773007	0.773007	0.773007	0.773007	0.773007	0.773007	0.837008	0.837008	0.837008	0.837008	0.837008	0.837008	0.837008	0.837008	0.837008	0.837008	0.837008	0.837008	0.837008	0.837008	0.837008	0.837008	0.837008	0.837008	0.837008	0.837008	0.837008	0.837008	0.837008	0.837008	0.837008	0.837008	0.837008
NAY3SF	0.882068	0.882068	0.882068	0.882068	0.882068	0.882068	0.882068	0.882068	0.882068	0.685213	0.685213	0.685213	0.685213	0.641655	0	0.571828	0.773007	0.773007	0.773007	0.773007	0.773007	0.773007	0.837008	0.837008	0.837008	0.837008	0.837008	0.837008	0.837008	0.837008	0.837008	0.837008	0.837008	0.837008	0.837008	0.837008	0.837008	0.837008	0.837008	0.837008	0.837008	0.837008	0.837008	0.837008	0.837008	0.837008	0.837008	0.837008	0.837008
NAY3US	0.882068	0.882068	0.882068	0.882068	0.882068	0.882068	0.882068	0.882068	0.882068	0.685213	0.685213	0.685213	0.685213	0.641655	0.571828	0	0.773007	0.773007	0.773007	0.773007	0.773007	0.773007	0.837008	0.837008	0.837008	0.837008	0.837008	0.837008	0.837008	0.837008	0.837008	0.837008	0.837008	0.837008	0.837008	0.837008	0.837008	0.837008	0.837008	0.837008	0.837008	0.837008	0.837008	0.837008	0.837008	0.837008	0.837008	0.837008	0.837008
JAL3SI	0.882068	0.882068	0.882068	0.882068	0.882068	0.882068	0.882068	0.882068	0.882068	0.773007	0.773007	0.773007	0.773007	0.773007	0.773007	0.773007	0	0.676666	0.676666	0.676666	0.730385	0.730385	0.837008	0.837008	0.837008	0.837008	0.837008	0.837008	0.837008	0.837008	0.837008	0.837008	0.837008	0.837008	0.837008	0.837008	0.837008	0.837008	0.837008	0.837008	0.837008	0.837008	0.837008	0.837008	0.837008	0.837008	0.837008	0.837008	0.837008
JAL3RF	0.882068	0.882068	0.882068	0.882068	0.882068	0.882068	0.882068	0.882068	0.882068	0.773007	0.773007	0.773007	0.773007	0.773007	0.773007	0.773007	0.676666	0	0.594134	0.594134	0.730385	0.730385	0.837008	0.837008	0.837008	0.837008	0.837008	0.837008	0.837008	0.837008	0.837008	0.837008	0.837008	0.837008	0.837008	0.837008	0.837008	0.837008	0.837008	0.837008	0.837008	0.837008	0.837008	0.837008	0.837008	0.837008	0.837008	0.837008	0.837008
JAL3SF	0.882068	0.882068	0.882068	0.882068	0.882068	0.882068	0.882068	0.882068	0.882068	0.773007	0.773007	0.773007	0.773007	0.773007	0.773007	0.773007	0.676666	0.594134	0	0.555677	0.730385	0.730385	0.837008	0.837008	0.837008	0.837008	0.837008	0.837008	0.837008	0.837008	0.837008	0.837008	0.837008	0.837008	0.837008	0.837008	0.837008	0.837008	0.837008	0.837008	0.837008	0.837008	0.837008	0.837008	0.837008	0.837008	0.837008	0.837008	0.837008
JAL3US	0.882068	0.882068	0.882068	0.882068	0.882068	0.882068	0.882068	0.882068	0.882068	0.773007	0.773007	0.773007	0.773007	0.773007	0.773007	0.773007	0.676666	0.594134	0.555677	0	0.730385	0.730385	0.837008	0.837008	0.837008	0.837008	0.837008	0.837008	0.837008	0.837008	0.837008	0.837008	0.837008	0.837008	0.837008	0.837008	0.837008	0.837008	0.837008	0.837008	0.837008	0.837008	0.837008	0.837008	0.837008	0.837008	0.837008	0.837008	0.837008
JAL1SI	0.882068	0.882068	0.882068	0.882068	0.882068	0.882068	0.882068	0.882068	0.882068	0.773007	0.773007	0.773007	0.773007	0.773007	0.773007	0.773007	0.730385	0.730385	0.730385	0.730385	0	0.690373	0.837008	0.837008	0.837008	0.837008	0.837008	0.837008	0.837008	0.837008	0.837008	0.837008	0.837008	0.837008	0.837008	0.837008	0.837008	0.837008	0.837008	0.837008	0.837008	0.837008	0.837008	0.837008	0.837008	0.837008	0.837008	0.837008	0.837008
JAL4SI	0.882068	0.882068	0.882068	0.882068	0.882068	0.882068	0.882068	0.882068	0.882068	0.773007	0.773007	0.773007	0.773007	0.773007	0.773007	0.773007	0.730385	0.730385	0.730385	0.730385	0.690373	0	0.837008	0.837008	0.837008	0.837008	0.837008	0.837008	0.837008	0.837008	0.837008	0.837008	0.837008	0.837008	0.837008	0.837008	0.837008	0.837008	0.837008	0.837008	0.837008	0.837008	0.837008	0.837008	0.837008	0.837008	0.837008	0.837008	0.837008
JAL4ECT	0.882068	0.882068	0.882068	0.882068	0.882068	0.882068	0.882068	0.882068	0.882068	0.837008	0.837008	0.837008	0.837008	0.837008	0.837008	0.837008	0.837008	0.837008	0.837008	0.837008	0.837008	0.837008	0	0.651496	0.651496	0.651496	0.769954	0.769954	0.769954	0.769954	0.769954	0.769954	0.769954	0.769954	0.769954	0.769954	0.769954	0.769954	0.769954	0.769954	0.769954	0.823196	0.823196	0.823196	0.823196	0.823196	0.823196	0.823196	0.823196
JAL4RF	0.882068	0.882068	0.882068	0.882068	0.882068	0.882068	0.882068	0.882068	0.882068	0.837008	0.837008	0.837008	0.837008	0.837008	0.837008	0.837008	0.837008	0.837008	0.837008	0.837008	0.837008	0.837008	0.651496	0	0.580746	0.580746	0.769954	0.769954	0.769954	0.769954	0.769954	0.769954	0.769954	0.769954	0.769954	0.769954	0.769954	0.769954	0.769954	0.769954	0.769954	0.823196	0.823196	0.823196	0.823196	0.823196	0.823196	0.823196	0.823196
JAL4SF	0.882068	0.882068	0.882068	0.882068	0.882068	0.882068	0.882068	0.882068	0.882068	0.837008	0.837008	0.837008	0.837008	0.837008	0.837008	0.837008	0.837008	0.837008	0.837008	0.837008	0.837008	0.837008	0.651496	0.580746	0	0.571322	0.769954	0.769954	0.769954	0.769954	0.769954	0.769954	0.769954	0.769954	0.769954	0.769954	0.769954	0.769954	0.769954	0.769954	0.769954	0.823196	0.823196	0.823196	0.823196	0.823196	0.823196	0.823196	0.823196
JAL4US	0.882068	0.882068	0.882068	0.882068	0.882068	0.882068	0.882068	0.882068	0.882068	0.837008	0.837008	0.837008	0.837008	0.837008	0.837008	0.837008	0.837008	0.837008	0.837008	0.837008	0.837008	0.837008	0.651496	0.580746	0.571322	0	0.769954	0.769954	0.769954	0.769954	0.769954	0.769954	0.769954	0.769954	0.769954	0.769954	0.769954	0.769954	0.769954	0.769954	0.769954	0.823196	0.823196	0.823196	0.823196	0.823196	0.823196	0.823196	0.823196
SLP1SI	0.882068	0.882068	0.882068	0.882068	0.882068	0.882068	0.882068	0.882068	0.882068	0.837008	0.837008	0.837008	0.837008	0.837008	0.837008	0.837008	0.837008	0.837008	0.837008	0.837008	0.837008	0.837008	0.769954	0.769954	0.769954	0.769954	0	0.672208	0.672208	0.672208	0.731241	0.731241	0.731241	0.731241	0.731241	0.731241	0.731241	0.731241	0.731241	0.731241	0.731241	0.823196	0.823196	0.823196	0.823196	0.823196	0.823196	0.823196	0.823196
SLP1US	0.882068	0.882068	0.882068	0.882068	0.882068	0.882068	0.882068	0.882068	0.882068	0.837008	0.837008	0.837008	0.837008	0.837008	0.837008	0.837008	0.837008	0.837008	0.837008	0.837008	0.837008	0.837008	0.769954	0.769954	0.769954	0.769954	0.672208	0	0.62876	0.62876	0.731241	0.731241	0.731241	0.731241	0.731241	0.731241	0.731241	0.731241	0.731241	0.731241	0.731241	0.823196	0.823196	0.823196	0.823196	0.823196	0.823196	0.823196	0.823196
SLP1RF	0.882068	0.882068	0.882068	0.882068	0.882068	0.882068	0.882068	0.882068	0.882068	0.837008	0.837008	0.837008	0.837008	0.837008	0.837008	0.837008	0.837008	0.837008	0.837008	0.837008	0.837008	0.837008	0.769954	0.769954	0.769954	0.769954	0.672208	0.62876	0	0.574795	0.731241	0.731241	0.731241	0.731241	0.731241	0.731241	0.731241	0.731241	0.731241	0.731241	0.731241	0.823196	0.823196	0.823196	0.823196	0.823196	0.823196	0.823196	0.823196
SLP1ECT	0.882068	0.882068	0.882068	0.882068	0.882068	0.882068	0.882068	0.882068	0.882068	0.837008	0.837008	0.837008	0.837008	0.837008	0.837008	0.837008	0.837008	0.837008	0.837008	0.837008	0.837008	0.837008	0.769954	0.769954	0.769954	0.769954	0.672208	0.62876	0.574795	0	0.731241	0.731241	0.731241	0.731241	0.731241	0.731241	0.731241	0.731241	0.731241	0.731241	0.731241	0.823196	0.823196	0.823196	0.823196	0.823196	0.823196	0.823196	0.823196
JAL5SI	0.882068	0.882068	0.882068	0.882068	0.882068	0.882068	0.882068	0.882068	0.882068	0.837008	0.837008	0.837008	0.837008	0.837008	0.837008	0.837008	0.837008	0.837008	0.837008	0.837008	0.837008	0.837008	0.769954	0.769954	0.769954	0.769954	0.731241	0.731241	0.731241	0.731241	0	0.684147	0.684147	0.684147	0.684147	0.719786	0.719786	0.719786	0.719786	0.719786	0.719786	0.823196	0.823196	0.823196	0.823196	0.823196	0.823196	0.823196	0.823196
JAL5RF	0.882068	0.882068	0.882068	0.882068	0.882068	0.882068	0.882068	0.882068	0.882068	0.837008	0.837008	0.837008	0.837008	0.837008	0.837008	0.837008	0.837008	0.837008	0.837008	0.837008	0.837008	0.837008	0.769954	0.769954	0.769954	0.769954	0.731241	0.731241	0.731241	0.731241	0.684147	0	0.54092	0.611301	0.611301	0.719786	0.719786	0.719786	0.719786	0.719786	0.719786	0.823196	0.823196	0.823196	0.823196	0.823196	0.823196	0.823196	0.823196
JAL5ECT	0.882068	0.882068	0.882068	0.882068	0.882068	0.882068	0.882068	0.882068	0.882068	0.837008	0.837008	0.837008	0.837008	0.837008	0.837008	0.837008	0.837008	0.837008	0.837008	0.837008	0.837008	0.837008	0.769954	0.769954	0.769954	0.769954	0.731241	0.731241	0.731241	0.731241	0.684147	0.54092	0	0.611301	0.611301	0.719786	0.719786	0.719786	0.719786	0.719786	0.719786	0.823196	0.823196	0.823196	0.823196	0.823196	0.823196	0.823196	0.823196
JAL5SF	0.882068	0.882068	0.882068	0.882068	0.882068	0.882068	0.882068	0.882068	0.882068	0.837008	0.837008	0.837008	0.837008	0.837008	0.837008	0.837008	0.837008	0.837008	0.837008	0.837008	0.837008	0.837008	0.769954	0.769954	0.769954	0.769954	0.731241	0.731241	0.731241	0.731241	0.684147	0.611301	0.611301	0	0.552492	0.719786	0.719786	0.719786	0.719786	0.719786	0.719786	0.823196	0.823196	0.823196	0.823196	0.823196	0.823196	0.823196	0.823196
JAL5US	0.882068	0.882068	0.882068	0.882068	0.882068	0.882068	0.882068	0.882068	0.882068	0.837008	0.837008	0.837008	0.837008	0.837008	0.837008	0.837008	0.837008	0.837008	0.837008	0.837008	0.837008	0.837008	0.769954	0.769954	0.769954	0.769954	0.731241	0.731241	0.731241	0.731241	0.684147	0.611301	0.611301	0.552492	0	0.719786	0.719786	0.719786	0.719786	0.719786	0.719786	0.823196	0.823196	0.823196	0.823196	0.823196	0.823196	0.823196	0.823196
JAL1RF	0.882068	0.882068	0.882068	0.882068	0.882068	0.882068	0.882068	0.882068	0.882068	0.837008	0.837008	0.837008	0.837008	0.837008	0.837008	0.837008	0.837008	0.837008	0.837008	0.837008	0.837008	0.837008	0.769954	0.769954	0.769954	0.769954	0.731241	0.731241	0.731241	0.731241	0.719786	0.719786	0.719786	0.719786	0.719786	0	0.592902	0.592902	0.694073	0.694073	0.694073	0.823196	0.823196	0.823196	0.823196	0.823196	0.823196	0.823196	0.823196
JAL1SF	0.882068	0.882068	0.882068	0.882068	0.882068	0.882068	0.882068	0.882068	0.882068	0.837008	0.837008	0.837008	0.837008	0.837008	0.837008	0.837008	0.837008	0.837008	0.837008	0.837008	0.837008	0.837008	0.769954	0.769954	0.769954	0.769954	0.731241	0.731241	0.731241	0.731241	0.719786	0.719786	0.719786	0.719786	0.719786	0.592902	0	0.579904	0.694073	0.694073	0.694073	0.823196	0.823196	0.823196	0.823196	0.823196	0.823196	0.823196	0.823196
JAL1US	0.882068	0.882068	0.882068	0.882068	0.882068	0.882068	0.882068	0.882068	0.882068	0.837008	0.837008	0.837008	0.837008	0.837008	0.837008	0.837008	0.837008	0.837008	0.837008	0.837008	0.837008	0.837008	0.769954	0.769954	0.769954	0.769954	0.731241	0.731241	0.731241	0.731241	0.719786	0.719786	0.719786	0.719786	0.719786	0.592902	0.579904	0	0.694073	0.694073	0.694073	0.823196	0.823196	0.823196	0.823196	0.823196	0.823196	0.823196	0.823196
SLP1SF	0.882068	0.882068	0.882068	0.882068	0.882068	0.882068	0.882068	0.882068	0.882068	0.837008	0.837008	0.837008	0.837008	0.837008	0.837008	0.837008	0.837008	0.837008	0.837008	0.837008	0.837008	0.837008	0.769954	0.769954	0.769954	0.769954	0.731241	0.731241	0.731241	0.731241	0.719786	0.719786	0.719786	0.719786	0.719786	0.694073	0.694073	0.694073	0	0.637358	0.637358	0.823196	0.823196	0.823196	0.823196	0.823196	0.823196	0.823196	0.823196
AGS1SI	0.882068	0.882068	0.882068	0.882068	0.882068	0.882068	0.882068	0.882068	0.882068	0.837008	0.837008	0.837008	0.837008	0.837008	0.837008	0.837008	0.837008	0.837008	0.837008	0.837008	0.837008	0.837008	0.769954	0.769954	0.769954	0.769954	0.731241	0.731241	0.731241	0.731241	0.719786	0.719786	0.719786	0.719786	0.719786	0.694073	0.694073	0.694073	0.637358	0	0.608929	0.823196	0.823196	0.823196	0.823196	0.823196	0.823196	0.823196	0.823196
AGS1US	0.882068	0.882068	0.882068	0.882068	0.882068	0.882068	0.882068	0.882068	0.882068	0.837008	0.837008	0.837008	0.837008	0.837008	0.837008	0.837008	0.837008	0.837008	0.837008	0.837008	0.837008	0.837008	0.769954	0.769954	0.769954	0.769954	0.731241	0.731241	0.731241	0.731241	0.719786	0.719786	0.719786	0.719786	0.719786	0.694073	0.694073	0.694073	0.637358	0.608929	0	0.823196	0.823196	0.823196	0.823196	0.823196	0.823196	0.823196	0.823196
DGO1SI	0.882068	0.882068	0.882068	0.882068	0.882068	0.882068	0.882068	0.882068	0.882068	0.837008	0.837008	0.837008	0.837008	0.837008	0.837008	0.837008	0.837008	0.837008	0.837008	0.837008	0.837008	0.837008	0.823196	0.823196	0.823196	0.823196	0.823196	0.823196	0.823196	0.823196	0.823196	0.823196	0.823196	0.823196	0.823196	0.823196	0.823196	0.823196	0.823196	0.823196	0.823196	0	0.690251	0.690251	0.690251	0.742225	0.742225	0.742225	0.742225
DGO1RF	0.882068	0.882068	0.882068	0.882068	0.882068	0.882068	0.882068	0.882068	0.882068	0.837008	0.837008	0.837008	0.837008	0.837008	0.837008	0.837008	0.837008	0.837008	0.837008	0.837008	0.837008	0.837008	0.823196	0.823196	0.823196	0.823196	0.823196	0.823196	0.823196	0.823196	0.823196	0.823196	0.823196	0.823196	0.823196	0.823196	0.823196	0.823196	0.823196	0.823196	0.823196	0.690251	0	0.635503	0.635503	0.742225	0.742225	0.742225	0.742225
DGO1US	0.882068	0.882068	0.882068	0.882068	0.882068	0.882068	0.882068	0.882068	0.882068	0.837008	0.837008	0.837008	0.837008	0.837008	0.837008	0.837008	0.837008	0.837008	0.837008	0.837008	0.837008	0.837008	0.823196	0.823196	0.823196	0.823196	0.823196	0.823196	0.823196	0.823196	0.823196	0.823196	0.823196	0.823196	0.823196	0.823196	0.823196	0.823196	0.823196	0.823196	0.823196	0.690251	0.635503	0	0.550367	0.742225	0.742225	0.742225	0.742225
DGO1SF	0.882068	0.882068	0.882068	0.882068	0.882068	0.882068	0.882068	0.882068	0.882068	0.837008	0.837008	0.837008	0.837008	0.837008	0.837008	0.837008	0.837008	0.837008	0.837008	0.837008	0.837008	0.837008	0.823196	0.823196	0.823196	0.823196	0.823196	0.823196	0.823196	0.823196	0.823196	0.823196	0.823196	0.823196	0.823196	0.823196	0.823196	0.823196	0.823196	0.823196	0.823196	0.690251	0.635503	0.550367	0	0.742225	0.742225	0.742225	0.742225
SIN2RF	0.882068	0.882068	0.882068	0.882068	0.882068	0.882068	0.882068	0.882068	0.882068	0.837008	0.837008	0.837008	0.837008	0.837008	0.837008	0.837008	0.837008	0.837008	0.837008	0.837008	0.837008	0.837008	0.823196	0.823196	0.823196	0.823196	0.823196	0.823196	0.823196	0.823196	0.823196	0.823196	0.823196	0.823196	0.823196	0.823196	0.823196	0.823196	0.823196	0.823196	0.823196	0.742225	0.742225	0.742225	0.742225	0	0.555993	0.681119	0.681119
SIN2ECT	0.882068	0.882068	0.882068	0.882068	0.882068	0.882068	0.882068	0.882068	0.882068	0.837008	0.837008	0.837008	0.837008	0.837008	0.837008	0.837008	0.837008	0.837008	0.837008	0.837008	0.837008	0.837008	0.823196	0.823196	0.823196	0.823196	0.823196	0.823196	0.823196	0.823196	0.823196	0.823196	0.823196	0.823196	0.823196	0.823196	0.823196	0.823196	0.823196	0.823196	0.823196	0.742225	0.742225	0.742225	0.742225	0.555993	0	0.681119	0.681119
SIN2SI	0.882068	0.882068	0.882068	0.882068	0.882068	0.882068	0.882068	0.882068	0.882068	0.837008	0.837008	0.837008	0.837008	0.837008	0.837008	0.837008	0.837008	0.837008	0.837008	0.837008	0.837008	0.837008	0.823196	0.823196	0.823196	0.823196	0.823196	0.823196	0.823196	0.823196	0.823196	0.823196	0.823196	0.823196	0.823196	0.823196	0.823196	0.823196	0.823196	0.823196	0.823196	0.742225	0.742225	0.742225	0.742225	0.681119	0.681119	0	0.621151
SIN2US	0.882068	0.882068	0.882068	0.882068	0.882068	0.882068	0.882068	0.882068	0.882068	0.837008	0.837008	0.837008	0.837008	0.837008	0.837008	0.837008	0.837008	0.837008	0.837008	0.837008	0.837008	0.837008	0.823196	0.823196	0.823196	0.823196	0.823196	0.823196	0.823196	0.823196	0.823196	0.823196	0.823196	0.823196	0.823196	0.823196	0.823196	0.823196	0.823196	0.823196	0.823196	0.742225	0.742225	0.742225	0.742225	0.681119	0.681119	0.621151	0
SIN2SF	0.882068	0.882068	0.882068	0.882068	0.882068	0.882068	0.882068	0.882068	0.882068	0.837008	0.837008	0.837008	0.837008	0.837008	0.837008	0.837008	0.837008	0.837008	0.837008	0.837008	0.837008	0.837008	0.823196	0.823196	0.823196	0.823196	0.823196	0.823196	0.823196	0.823196	0.823196	0.823196	0.823196	0.823196	0.823196	0.823196	0.823196	0.823196	0.823196	0.823196	0.823196	0.742225	0.742225	0.742225	0.742225	0.681119	0.681119	0.621151	0.559116
GTO3SF	0.882068	0.882068	0.882068	0.882068	0.882068	0.882068	0.882068	0.882068	0.882068	0.837008	0.837008	0.837008	0.837008	0.837008	0.837008	0.837008	0.837008	0.837008	0.837008	0.837008	0.837008	0.837008	0.823196	0.823196	0.823196	0.823196	0.823196	0.823196	0.823196	0.823196	0.823196	0.823196	0.823196	0.823196	0.823196	0.823196	0.823196	0.823196	0.823196	0.823196	0.823196	0.742225	0.742225	0.742225	0.742225	0.736067	0.736067	0.736067	0.736067
GTO3US	0.882068	0.882068	0.882068	0.882068	0.882068	0.882068	0.882068	0.882068	0.882068	0.837008	0.837008	0.837008	0.837008	0.837008	0.837008	0.837008	0.837008	0.837008	0.837008	0.837008	0.837008	0.837008	0.823196	0.823196	0.823196	0.823196	0.823196	0.823196	0.823196	0.823196	0.823196	0.823196	0.823196	0.823196	0.823196	0.823196	0.823196	0.823196	0.823196	0.823196	0.823196	0.742225	0.742225	0.742225	0.742225	0.736067	0.736067	0.736067	0.736067
GTO3SI	0.882068	0.882068	0.882068	0.882068	0.882068	0.882068	0.882068	0.882068	0.882068	0.837008	0.837008	0.837008	0.837008	0.837008	0.837008	0.837008	0.837008	0.837008	0.837008	0.837008	0.837008	0.837008	0.823196	0.823196	0.823196	0.823196	0.823196	0.823196	0.823196	0.823196	0.823196	0.823196	0.823196	0.823196	0.823196	0.823196	0.823196	0.823196	0.823196	0.823196	0.823196	0.742225	0.742225	0.742225	0.742225	0.736067	0.736067	0.736067	0.736067
GTO1SI	0.882068	0.882068	0.882068	0.882068	0.882068	0.882068	0.882068	0.882068	0.882068	0.837008	0.837008	0.837008	0.837008	0.837008	0.837008	0.837008	0.837008	0.837008	0.837008	0.837008	0.837008	0.837008	0.823196	0.823196	0.823196	0.823196	0.823196	0.823196	0.823196	0.823196	0.823196	0.823196	0.823196	0.823196	0.823196	0.823196	0.823196	0.823196	0.823196	0.823196	0.823196	0.742225	0.742225	0.742225	0.742225	0.736067	0.736067	0.736067	0.736067
GTO1SF	0.882068	0.882068	0.882068	0.882068	0.882068	0.882068	0.882068	0.882068	0.882068	0.837008	0.837008	0.837008	0.837008	0.837008	0.837008	0.837008	0.837008	0.837008	0.837008	0.837008	0.837008	0.837008	0.823196	0.823196	0.823196	0.823196	0.823196	0.823196	0.823196	0.823196	0.823196	0.823196	0.823196	0.823196	0.823196	0.823196	0.823196	0.823196	0.823196	0.823196	0.823196	0.742225	0.742225	0.742225	0.742225	0.736067	0.736067	0.736067	0.736067
GTO1US	0.882068	0.882068	0.882068	0.882068	0.882068	0.882068	0.882068	0.882068	0.882068	0.837008	0.837008	0.837008	0.837008	0.837008	0.837008	0.837008	0.837008	0.837008	0.837008	0.837008	0.837008	0.837008	0.823196	0.823196	0.823196	0.823196	0.823196	0.823196	0.823196	0.823196	0.823196	0.823196	0.823196	0.823196	0.823196	0.823196	0.823196	0.823196	0.823196	0.823196	0.823196	0.742225	0.742225	0.742225	0.742225	0.736067	0.736067	0.736067	0.736067
JAL2SI	0.882068	0.882068	0.882068	0.882068	0.882068	0.882068	0.882068	0.882068	0.882068	0.837008	0.837008	0.837008	0.837008	0.837008	0.837008	0.837008	0.837008	0.837008	0.837008	0.837008	0.837008	0.837008	0.823196	0.823196	0.823196	0.823196	0.823196	0.823196	0.823196	0.823196	0.823196	0.823196	0.823196	0.823196	0.823196	0.823196	0.823196	0.823196	0.823196	0.823196	0.823196	0.742225	0.742225	0.742225	0.742225	0.736067	0.736067	0.736067	0.736067
GTO2SI	0.882068	0.882068	0.882068	0.882068	0.882068	0.882068	0.882068	0.882068	0.882068	0.837008	0.837008	0.837008	0.837008	0.837008	0.837008	0.837008	0.837008	0.837008	0.837008	0.837008	0.837008	0.837008	0.823196	0.823196	0.823196	0.823196	0.823196	0.823196	0.823196	0.823196	0.823196	0.823196	0.823196	0.823196	0.823196	0.823196	0.823196	0.823196	0.823196	0.823196	0.823196	0.742225	0.742225	0.742225	0.742225	0.736067	0.736067	0.736067	0.736067
SIN1SI	0.882068	0.882068	0.882068	0.882068	0.882068	0.882068	0.882068	0.882068	0.882068	0.837008	0.837008	0.837008	0.837008	0.837008	0.837008	0.837008	0.837008	0.837008	0.837008	0.837008	0.837008	0.837008	0.823196	0.823196	0.823196	0.823196	0.823196	0.823196	0.823196	0.823196	0.823196	0.823196	0.823196	0.823196	0.823196	0.823196	0.823196	0.823196	0.823196	0.823196	0.823196	0.787938	0.787938	0.787938	0.787938	0.787938	0.787938	0.787938	0.787938
SIN1SF	0.882068	0.882068	0.882068	0.882068	0.882068	0.882068	0.882068	0.882068	0.882068	0.837008	0.837008	0.837008	0.837008	0.837008	0.837008	0.837008	0.837008	0.837008	0.837008	0.837008	0.837008	0.837008	0.823196	0.823196	0.823196	0.823196	0.823196	0.823196	0.823196	0.823196	0.823196	0.823196	0.823196	0.823196	0.823196	0.823196	0.823196	0.823196	0.823196	0.823196	0.823196	0.787938	0.787938	0.787938	0.787938	0.787938	0.787938	0.787938	0.787938
SIN1US	0.882068	0.882068	0.882068	0.882068	0.882068	0.882068	0.882068	0.882068	0.882068	0.837008	0.837008	0.837008	0.837008	0.837008	0.837008	0.837008	0.837008	0.837008	0.837008	0.837008	0.837008	0.837008	0.823196	0.823196	0.823196	0.823196	0.823196	0.823196	0.823196	0.823196	0.823196	0.823196	0.823196	0.823196	0.823196	0.823196	0.823196	0.823196	0.823196	0.823196	0.823196	0.787938	0.787938	0.787938	0.787938	0.787938	0.787938	0.787938	0.787938
GTO1RF	0.882068	0.882068	0.882068	0.882068	0.882068	0.882068	0.882068	0.882068	0.882068	0.837008	0.837008	0.837008	0.837008	0.837008	0.837008	0.837008	0.837008	0.837008	0.837008	0.837008	0.837008	0.837008	0.823196	0.823196	0.823196	0.823196	0.823196	0.823196	0.823196	0.823196	0.823196	0.823196	0.823196	0.823196	0.823196	0.823196	0.823196	0.823196	0.823196	0.823196	0.823196	0.787938	0.787938	0.787938	0.787938	0.787938	0.787938	0.787938	0.787938
GTO1ECT	0.882068	0.882068	0.882068	0.882068	0.882068	0.882068	0.882068	0.882068	0.882068	0.837008	0.837008	0.837008	0.837008	0.837008	0.837008	0.837008	0.837008	0.837008	0.837008	0.837008	0.837008	0.837008	0.823196	0.823196	0.823196	0.823196	0.823196	0.823196	0.823196	0.823196	0.823196	0.823196	0.823196	0.823196	0.823196	0.823196	0.823196	0.823196	0.823196	0.823196	0.823196	0.787938	0.787938	0.787938	0.787938	0.787938	0.787938	0.787938	0.787938
AGS1RF	0.882068	0.882068	0.882068	0.882068	0.882068	0.882068	0.882068	0.882068	0.882068	0.837008	0.837008	0.837008	0.837008	0.837008	0.837008	0.837008	0.837008	0.837008	0.837008	0.837008	0.837008	0.837008	0.823196	0.823196	0.823196	0.823196	0.823196	0.823196	0.823196	0.823196	0.823196	0.823196	0.823196	0.823196	0.823196	0.823196	0.823196	0.823196	0.823196	0.823196	0.823196	0.787938	0.787938	0.787938	0.787938	0.787938	0.787938	0.787938	0.787938
AGS1ECT	0.882068	0.882068	0.882068	0.882068	0.882068	0.882068	0.882068	0.882068	0.882068	0.837008	0.837008	0.837008	0.837008	0.837008	0.837008	0.837008	0.837008	0.837008	0.837008	0.837008	0.837008	0.837008	0.823196	0.823196	0.823196	0.823196	0.823196	0.823196	0.823196	0.823196	0.823196	0.823196	0.823196	0.823196	0.823196	0.823196	0.823196	0.823196	0.823196	0.823196	0.823196	0.787938	0.787938	0.787938	0.787938	0.787938	0.787938	0.787938	0.787938
JAL2SF	0.882068	0.882068	0.882068	0.882068	0.882068	0.882068	0.882068	0.882068	0.882068	0.837008	0.837008	0.837008	0.837008	0.837008	0.837008	0.837008	0.837008	0.837008	0.837008	0.837008	0.837008	0.837008	0.823196	0.823196	0.823196	0.823196	0.823196	0.823196	0.823196	0.823196	0.823196	0.823196	0.823196	0.823196	0.823196	0.823196	0.823196	0.823196	0.823196	0.823196	0.823196	0.787938	0.787938	0.787938	0.787938	0.787938	0.787938	0.787938	0.787938
JAL2US	0.882068	0.882068	0.882068	0.882068	0.882068	0.882068	0.882068	0.882068	0.882068	0.837008	0.837008	0.837008	0.837008	0.837008	0.837008	0.837008	0.837008	0.837008	0.837008	0.837008	0.837008	0.837008	0.823196	0.823196	0.823196	0.823196	0.823196	0.823196	0.823196	0.823196	0.823196	0.823196	0.823196	0.823196	0.823196	0.823196	0.823196	0.823196	0.823196	0.823196	0.823196	0.787938	0.787938	0.787938	0.787938	0.787938	0.787938	0.787938	0.787938
JAL2RF	0.882068	0.882068	0.882068	0.882068	0.882068	0.882068	0.882068	0.882068	0.882068	0.837008	0.837008	0.837008	0.837008	0.837008	0.837008	0.837008	0.837008	0.837008	0.837008	0.837008	0.837008	0.837008	0.823196	0.823196	0.823196	0.823196	0.823196	0.823196	0.823196	0.823196	0.823196	0.823196	0.823196	0.823196	0.823196	0.823196	0.823196	0.823196	0.823196	0.823196	0.823196	0.787938	0.787938	0.787938	0.787938	0.787938	0.787938	0.787938	0.787938
JAL2ECT	0.882068	0.882068	0.882068	0.882068	0.882068	0.882068	0.882068	0.882068	0.882068	0.837008	0.837008	0.837008	0.837008	0.837008	0.837008	0.837008	0.837008	0.837008	0.837008	0.837008	0.837008	0.837008	0.823196	0.823196	0.823196	0.823196	0.823196	0.823196	0.823196	0.823196	0.823196	0.823196	0.823196	0.823196	0.823196	0.823196	0.823196	0.823196	0.823196	0.823196	0.823196	0.787938	0.787938	0.787938	0.787938	0.787938	0.787938	0.787938	0.787938
GTO2ECT	0.882068	0.882068	0.882068	0.882068	0.882068	0.882068	0.882068	0.882068	0.882068	0.837008	0.837008	0.837008	0.837008	0.837008	0.837008	0.837008	0.837008	0.837008	0.837008	0.837008	0.837008	0.837008	0.823196	0.823196	0.823196	0.823196	0.823196	0.823196	0.823196	0.823196	0.823196	0.823196	0.823196	0.823196	0.823196	0.823196	0.823196	0.823196	0.823196	0.823196	0.823196	0.787938	0.787938	0.787938	0.787938	0.787938	0.787938	0.787938	0.787938
GTO2US	0.882068	0.882068	0.882068	0.882068	0.882068	0.882068	0.882068	0.882068	0.882068	0.837008	0.837008	0.837008	0.837008	0.837008	0.837008	0.837008	0.837008	0.837008	0.837008	0.837008	0.837008	0.837008	0.823196	0.823196	0.823196	0.823196	0.823196	0.823196	0.823196	0.823196	0.823196	0.823196	0.823196	0.823196	0.823196	0.823196	0.823196	0.823196	0.823196	0.823196	0.823196	0.787938	0.787938	0.787938	0.787938	0.787938	0.787938	0.787938	0.787938
GTO2SF	0.882068	0.882068	0.882068	0.882068	0.882068	0.882068	0.882068	0.882068	0.882068	0.837008	0.837008	0.837008	0.837008	0.837008	0.837008	0.837008	0.837008	0.837008	0.837008	0.837008	0.837008	0.837008	0.823196	0.823196	0.823196	0.823196	0.823196	0.823196	0.823196	0.823196	0.823196	0.823196	0.823196	0.823196	0.823196	0.823196	0.823196	0.823196	0.823196	0.823196	0.823196	0.787938	0.787938	0.787938	0.787938	0.787938	0.787938	0.787938	0.787938
GTO2RF	0.882068	0.882068	0.882068	0.882068	0.882068	0.882068	0.882068	0.882068	0.882068	0.837008	0.837008	0.837008	0.837008	0.837008	0.837008	0.837008	0.837008	0.837008	0.837008	0.837008	0.837008	0.837008	0.823196	0.823196	0.823196	0.823196	0.823196	0.823196	0.823196	0.823196	0.823196	0.823196	0.823196	0.823196	0.823196	0.823196	0.823196	0.823196	0.823196	0.823196	0.823196	0.787938	0.787938	0.787938	0.787938	0.787938	0.787938	0.787938	0.787938
DGO1ECT	0.882068	0.882068	0.882068	0.882068	0.882068	0.882068	0.882068	0.882068	0.882068	0.837008	0.837008	0.837008	0.837008	0.837008	0.837008	0.837008	0.837008	0.837008	0.837008	0.837008	0.837008	0.837008	0.823196	0.823196	0.823196	0.823196	0.823196	0.823196	0.823196	0.823196	0.823196	0.823196	0.823196	0.823196	0.823196	0.823196	0.823196	0.823196	0.823196	0.823196	0.823196	0.787938	0.787938	0.787938	0.787938	0.787938	0.787938	0.787938	0.787938
GTO3ECT	0.882068	0.882068	0.882068	0.882068	0.882068	0.882068	0.882068	0.882068	0.882068	0.837008	0.837008	0.837008	0.837008	0.837008	0.837008	0.837008	0.837008	0.837008	0.837008	0.837008	0.837008	0.837008	0.823196	0.823196	0.823196	0.823196	0.823196	0.823196	0.823196	0.823196	0.823196	0.823196	0.823196	0.823196	0.823196	0.823196	0.823196	0.823196	0.823196	0.823196	0.823196	0.787938	0.787938	0.787938	0.787938	0.787938	0.787938	0.787938	0.787938
GTO3RF	0.882068	0.882068	0.882068	0.882068	0.882068	0.882068	0.882068	0.882068	0.882068	0.837008	0.837008	0.837008	0.837008	0.837008	0.837008	0.837008	0.837008	0.837008	0.837008	0.837008	0.837008	0.837008	0.823196	0.823196	0.823196	0.823196	0.823196	0.823196	0.823196	0.823196	0.823196	0.823196	0.823196	0.823196	0.823196	0.823196	0.823196	0.823196	0.823196	0.823196	0.823196	0.787938	0.787938	0.787938	0.787938	0.787938	0.787938	0.787938	0.787938
JAL1ECT	0.882068	0.882068	0.882068	0.882068	0.882068	0.882068	0.882068	0.882068	0.882068	0.837008	0.837008	0.837008	0.837008	0.837008	0.837008	0.837008	0.837008	0.837008	0.837008	0.837008	0.837008	0.837008	0.823196	0.823196	0.823196	0.823196	0.823196	0.823196	0.823196	0.823196	0.823196	0.823196	0.823196	0.823196	0.823196	0.823196	0.823196	0.823196	0.823196	0.823196	0.823196	0.787938	0.787938	0.787938	0.787938	0.787938	0.787938	0.787938	0.787938
SIN1RF	0.882068	0.882068	0.882068	0.882068	0.882068	0.882068	0.882068	0.882068	0.882068	0.837008	0.837008	0.837008	0.837008	0.837008	0.837008	0.837008	0.837008	0.837008	0.837008	0.837008	0.837008	0.837008	0.823196	0.823196	0.823196	0.823196	0.823196	0.823196	0.823196	0.823196	0.823196	0.823196	0.823196	0.823196	0.823196	0.823196	0.823196	0.823196	0.823196	0.823196	0.823196	0.787938	0.787938	0.787938	0.787938	0.787938	0.787938	0.787938	0.787938
SIN1ECT	0.882068	0.882068	0.882068	0.882068	0.882068	0.882068	0.882068	0.882068	0.882068	0.837008	0.837008	0.837008	0.837008	0.837008	0.837008	0.837008	0.837008	0.837008	0.837008	0.837008	0.837008	0.837008	0.823196	0.823196	0.823196	0.823196	0.823196	0.823196	0.823196	0.823196	0.823196	0.823196	0.823196	0.823196	0.823196	0.823196	0.823196	0.823196	0.823196	0.823196	0.823196	0.787938	0.787938	0.787938	0.787938	0.787938	0.787938	0.787938	0.787938
DGORZ	0.969275	0.969275	0.969275	0.969275	0.969275	0.969275	0.969275	0.969275	0.969275	0.969275	0.969275	0.969275	0.969275	0.969275	0.969275	0.969275	0.969275	0.969275	0.969275	0.969275	0.969275	0.969275	0.969275	0.969275	0.969275	0.969275	0.969275	0.969275	0.969275	0.969275	0.969275	0.969275	0.969275	0.969275	0.969275	0.969275	0.969275	0.969275	0.969275	0.969275	0.969275	0.969275	0.969275	0.969275	0.969275	0.969275	0.969275	0.969275	0.969275
SIN1EC	0.969275	0.969275	0.969275	0.969275	0.969275	0.969275	0.969275	0.969275	0.969275	0.969275	0.969275	0.969275	0.969275	0.969275	0.969275	0.969275	0.969275	0.969275	0.969275	0.969275	0.969275	0.969275	0.969275	0.969275	0.969275	0.969275	0.969275	0.969275	0.969275	0.969275	0.969275	0.969275	0.969275	0.969275	0.969275	0.969275	0.969275	0.969275	0.969275	0.969275	0.969275	0.969275	0.969275	0.969275	0.969275	0.969275	0.969275	0.969275	0.969275
SIN2RZ	0.969275	0.969275	0.969275	0.969275	0.969275	0.969275	0.969275	0.969275	0.969275	0.969275	0.969275	0.969275	0.969275	0.969275	0.969275	0.969275	0.969275	0.969275	0.969275	0.969275	0.969275	0.969275	0.969275	0.969275	0.969275	0.969275	0.969275	0.969275	0.969275	0.969275	0.969275	0.969275	0.969275	0.969275	0.969275	0.969275	0.969275	0.969275	0.969275	0.969275	0.969275	0.969275	0.969275	0.969275	0.969275	0.969275	0.969275	0.969275	0.969275
SIN1RZ	0.969275	0.969275	0.969275	0.969275	0.969275	0.969275	0.969275	0.969275	0.969275	0.969275	0.969275	0.969275	0.969275	0.969275	0.969275	0.969275	0.969275	0.969275	0.969275	0.969275	0.969275	0.969275	0.969275	0.969275	0.969275	0.969275	0.969275	0.969275	0.969275	0.969275	0.969275	0.969275	0.969275	0.969275	0.969275	0.969275	0.969275	0.969275	0.969275	0.969275	0.969275	0.969275	0.969275	0.969275	0.969275	0.969275	0.969275	0.969275	0.969275
GTO1EC	0.969275	0.969275	0.969275	0.969275	0.969275	0.969275	0.969275	0.969275	0.969275	0.969275	0.969275	0.969275	0.969275	0.969275	0.969275	0.969275	0.969275	0.969275	0.969275	0.969275	0.969275	0.969275	0.969275	0.969275	0.969275	0.969275	0.969275	0.969275	0.969275	0.969275	0.969275	0.969275	0.969275	0.969275	0.969275	0.969275	0.969275	0.969275	0.969275	0.969275	0.969275	0.969275	0.969275	0.969275	0.969275	0.969275	0.969275	0.969275	0.969275
GTO1RZ	0.969275	0.969275	0.969275	0.969275	0.969275	0.969275	0.969275	0.969275	0.969275	0.969275	0.969275	0.969275	0.969275	0.969275	0.969275	0.969275	0.969275	0.969275	0.969275	0.969275	0.969275	0.969275	0.969275	0.969275	0.969275	0.969275	0.969275	0.969275	0.969275	0.969275	0.969275	0.969275	0.969275	0.969275	0.969275	0.969275	0.969275	0.969275	0.969275	0.969275	0.969275	0.969275	0.969275	0.969275	0.969275	0.969275	0.969275	0.969275	0.969275
SLPEC	0.969275	0.969275	0.969275	0.969275	0.969275	0.969275	0.969275	0.969275	0.969275	0.969275	0.969275	0.969275	0.969275	0.969275	0.969275	0.969275	0.969275	0.969275	0.969275	0.969275	0.969275	0.969275	0.969275	0.969275	0.969275	0.969275	0.969275	0.969275	0.969275	0.969275	0.969275	0.969275	0.969275	0.969275	0.969275	0.969275	0.969275	0.969275	0.969275	0.969275	0.969275	0.969275	0.969275	0.969275	0.969275	0.969275	0.969275	0.969275	0.969275
SLPRZ	0.969275	0.969275	0.969275	0.969275	0.969275	0.969275	0.969275	0.969275	0.969275	0.969275	0.969275	0.969275	0.969275	0.969275	0.969275	0.969275	0.969275	0.969275	0.969275	0.969275	0.969275	0.969275	0.969275	0.969275	0.969275	0.969275	0.969275	0.969275	0.969275	0.969275	0.969275	0.969275	0.969275	0.969275	0.969275	0.969275	0.969275	0.969275	0.969275	0.969275	0.969275	0.969275	0.969275	0.969275	0.969275	0.969275	0.969275	0.969275	0.969275
ZACRZ	0.969275	0.969275	0.969275	0.969275	0.969275	0.969275	0.969275	0.969275	0.969275	0.969275	0.969275	0.969275	0.969275	0.969275	0.969275	0.969275	0.969275	0.969275	0.969275	0.969275	0.969275	0.969275	0.969275	0.969275	0.969275	0.969275	0.969275	0.969275	0.969275	0.969275	0.969275	0.969275	0.969275	0.969275	0.969275	0.969275	0.969275	0.969275	0.969275	0.969275	0.969275	0.969275	0.969275	0.969275	0.969275	0.969275	0.969275	0.969275	0.969275
AGSEC	0.969275	0.969275	0.969275	0.969275	0.969275	0.969275	0.969275	0.969275	0.969275	0.969275	0.969275	0.969275	0.969275	0.969275	0.969275	0.969275	0.969275	0.969275	0.969275	0.969275	0.969275	0.969275	0.969275	0.969275	0.969275	0.969275	0.969275	0.969275	0.969275	0.969275	0.969275	0.969275	0.969275	0.969275	0.969275	0.969275	0.969275	0.969275	0.969275	0.969275	0.969275	0.969275	0.969275	0.969275	0.969275	0.969275	0.969275	0.969275	0.969275
GTO2EC	0.969275	0.969275	0.969275	0.969275	0.969275	0.969275	0.969275	0.969275	0.969275	0.969275	0.969275	0.969275	0.969275	0.969275	0.969275	0.969275	0.969275	0.969275	0.969275	0.969275	0.969275	0.969275	0.969275	0.969275	0.969275	0.969275	0.969275	0.969275	0.969275	0.969275	0.969275	0.969275	0.969275	0.969275	0.969275	0.969275	0.969275	0.969275	0.969275	0.969275	0.969275	0.969275	0.969275	0.969275	0.969275	0.969275	0.969275	0.969275	0.969275
GTO3EC	0.969275	0.969275	0.969275	0.969275	0.969275	0.969275	0.969275	0.969275	0.969275	0.969275	0.969275	0.969275	0.969275	0.969275	0.969275	0.969275	0.969275	0.969275	0.969275	0.969275	0.969275	0.969275	0.969275	0.969275	0.969275	0.969275	0.969275	0.969275	0.969275	0.969275	0.969275	0.969275	0.969275	0.969275	0.969275	0.969275	0.969275	0.969275	0.969275	0.969275	0.969275	0.969275	0.969275	0.969275	0.969275	0.969275	0.969275	0.969275	0.969275
GTO3RZ	0.969275	0.969275	0.969275	0.969275	0.969275	0.969275	0.969275	0.969275	0.969275	0.969275	0.969275	0.969275	0.969275	0.969275	0.969275	0.969275	0.969275	0.969275	0.969275	0.969275	0.969275	0.969275	0.969275	0.969275	0.969275	0.969275	0.969275	0.969275	0.969275	0.969275	0.969275	0.969275	0.969275	0.969275	0.969275	0.969275	0.969275	0.969275	0.969275	0.969275	0.969275	0.969275	0.969275	0.969275	0.969275	0.969275	0.969275	0.969275	0.969275
SIN2EC	0.969275	0.969275	0.969275	0.969275	0.969275	0.969275	0.969275	0.969275	0.969275	0.969275	0.969275	0.969275	0.969275	0.969275	0.969275	0.969275	0.969275	0.969275	0.969275	0.969275	0.969275	0.969275	0.969275	0.969275	0.969275	0.969275	0.969275	0.969275	0.969275	0.969275	0.969275	0.969275	0.969275	0.969275	0.969275	0.969275	0.969275	0.969275	0.969275	0.969275	0.969275	0.969275	0.969275	0.969275	0.969275	0.969275	0.969275	0.969275	0.969275
GTO2RZ	0.969275	0.969275	0.969275	0.969275	0.969275	0.969275	0.969275	0.969275	0.969275	0.969275	0.969275	0.969275	0.969275	0.969275	0.969275	0.969275	0.969275	0.969275	0.969275	0.969275	0.969275	0.969275	0.969275	0.969275	0.969275	0.969275	0.969275	0.969275	0.969275	0.969275	0.969275	0.969275	0.969275	0.969275	0.969275	0.969275	0.969275	0.969275	0.969275	0.969275	0.969275	0.969275	0.969275	0.969275	0.969275	0.969275	0.969275	0.969275	0.969275
JAL2EC	0.969275	0.969275	0.969275	0.969275	0.969275	0.969275	0.969275	0.969275	0.969275	0.969275	0.969275	0.969275	0.969275	0.969275	0.969275	0.969275	0.969275	0.969275	0.969275	0.969275	0.969275	0.969275	0.969275	0.969275	0.969275	0.969275	0.969275	0.969275	0.969275	0.969275	0.969275	0.969275	0.969275	0.969275	0.969275	0.969275	0.969275	0.969275	0.969275	0.969275	0.969275	0.969275	0.969275	0.969275	0.969275	0.969275	0.969275	0.969275	0.969275
JAL2RZ	0.969275	0.969275	0.969275	0.969275	0.969275	0.969275	0.969275	0.969275	0.969275	0.969275	0.969275	0.969275	0.969275	0.969275	0.969275	0.969275	0.969275	0.969275	0.969275	0.969275	0.969275	0.969275	0.969275	0.969275	0.969275	0.969275	0.969275	0.969275	0.969275	0.969275	0.969275	0.969275	0.969275	0.969275	0.969275	0.969275	0.969275	0.969275	0.969275	0.969275	0.969275	0.969275	0.969275	0.969275	0.969275	0.969275	0.969275	0.969275	0.969275
NAY3RZ	0.969275	0.969275	0.969275	0.969275	0.969275	0.969275	0.969275	0.969275	0.969275	0.969275	0.969275	0.969275	0.969275	0.969275	0.969275	0.969275	0.969275	0.969275	0.969275	0.969275	0.969275	0.969275	0.969275	0.969275	0.969275	0.969275	0.969275	0.969275	0.969275	0.969275	0.969275	0.969275	0.969275	0.969275	0.969275	0.969275	0.969275	0.969275	0.969275	0.969275	0.969275	0.969275	0.969275	0.969275	0.969275	0.969275	0.969275	0.969275	0.969275
NAY2EC	0.969275	0.969275	0.969275	0.969275	0.969275	0.969275	0.969275	0.969275	0.969275	0.969275	0.969275	0.969275	0.969275	0.969275	0.969275	0.969275	0.969275	0.969275	0.969275	0.969275	0.969275	0.969275	0.969275	0.969275	0.969275	0.969275	0.969275	0.969275	0.969275	0.969275	0.969275	0.969275	0.969275	0.969275	0.969275	0.969275	0.969275	0.969275	0.969275	0.969275	0.969275	0.969275	0.969275	0.969275	0.969275	0.969275	0.969275	0.969275	0.969275
NAY2RZ	0.969275	0.969275	0.969275	0.969275	0.969275	0.969275	0.969275	0.969275	0.969275	0.969275	0.969275	0.969275	0.969275	0.969275	0.969275	0.969275	0.969275	0.969275	0.969275	0.969275	0.969275	0.969275	0.969275	0.969275	0.969275	0.969275	0.969275	0.969275	0.969275	0.969275	0.969275	0.969275	0.969275	0.969275	0.969275	0.969275	0.969275	0.969275	0.969275	0.969275	0.969275	0.969275	0.969275	0.969275	0.969275	0.969275	0.969275	0.969275	0.969275
JAL5EC	0.969275	0.969275	0.969275	0.969275	0.969275	0.969275	0.969275	0.969275	0.969275	0.969275	0.969275	0.969275	0.969275	0.969275	0.969275	0.969275	0.969275	0.969275	0.969275	0.969275	0.969275	0.969275	0.969275	0.969275	0.969275	0.969275	0.969275	0.969275	0.969275	0.969275	0.969275	0.969275	0.969275	0.969275	0.969275	0.969275	0.969275	0.969275	0.969275	0.969275	0.969275	0.969275	0.969275	0.969275	0.969275	0.969275	0.969275	0.969275	0.969275
JAL5RZ	0.969275	0.969275	0.969275	0.969275	0.969275	0.969275	0.969275	0.969275	0.969275	0.969275	0.969275	0.969275	0.969275	0.969275	0.969275	0.969275	0.969275	0.969275	0.969275	0.969275	0.969275	0.969275	0.969275	0.969275	0.969275	0.969275	0.969275	0.969275	0.969275	0.969275	0.969275	0.969275	0.969275	0.969275	0.969275	0.969275	0.969275	0.969275	0.969275	0.969275	0.969275	0.969275	0.969275	0.969275	0.969275	0.969275	0.969275	0.969275	0.969275
JAL3EC	0.969275	0.969275	0.969275	0.969275	0.969275	0.969275	0.969275	0.969275	0.969275	0.969275	0.969275	0.969275	0.969275	0.969275	0.969275	0.969275	0.969275	0.969275	0.969275	0.969275	0.969275	0.969275	0.969275	0.969275	0.969275	0.969275	0.969275	0.969275	0.969275	0.969275	0.969275	0.969275	0.969275	0.969275	0.969275	0.969275	0.969275	0.969275	0.969275	0.969275	0.969275	0.969275	0.969275	0.969275	0.969275	0.969275	0.969275	0.969275	0.969275
JAL3RZ	0.969275	0.969275	0.969275	0.969275	0.969275	0.969275	0.969275	0.969275	0.969275	0.969275	0.969275	0.969275	0.969275	0.969275	0.969275	0.969275	0.969275	0.969275	0.969275	0.969275	0.969275	0.969275	0.969275	0.969275	0.969275	0.969275	0.969275	0.969275	0.969275	0.969275	0.969275	0.969275	0.969275	0.969275	0.969275	0.969275	0.969275	0.969275	0.969275	0.969275	0.969275	0.969275	0.969275	0.969275	0.969275	0.969275	0.969275	0.969275	0.969275
JAL4RZ	0.969275	0.969275	0.969275	0.969275	0.969275	0.969275	0.969275	0.969275	0.969275	0.969275	0.969275	0.969275	0.969275	0.969275	0.969275	0.969275	0.969275	0.969275	0.969275	0.969275	0.969275	0.969275	0.969275	0.969275	0.969275	0.969275	0.969275	0.969275	0.969275	0.969275	0.969275	0.969275	0.969275	0.969275	0.969275	0.969275	0.969275	0.969275	0.969275	0.969275	0.969275	0.969275	0.969275	0.969275	0.969275	0.969275	0.969275	0.969275	0.969275
JAL1RZ	0.969275	0.969275	0.969275	0.969275	0.969275	0.969275	0.969275	0.969275	0.969275	0.969275	0.969275	0.969275	0.969275	0.969275	0.969275	0.969275	0.969275	0.969275	0.969275	0.969275	0.969275	0.969275	0.969275	0.969275	0.969275	0.969275	0.969275	0.969275	0.969275	0.969275	0.969275	0.969275	0.969275	0.969275	0.969275	0.969275	0.969275	0.969275	0.969275	0.969275	0.969275	0.969275	0.969275	0.969275	0.969275	0.969275	0.969275	0.969275	0.969275
JAL1EC	0.969275	0.969275	0.969275	0.969275	0.969275	0.969275	0.969275	0.969275	0.969275	0.969275	0.969275	0.969275	0.969275	0.969275	0.969275	0.969275	0.969275	0.969275	0.969275	0.969275	0.969275	0.969275	0.969275	0.969275	0.969275	0.969275	0.969275	0.969275	0.969275	0.969275	0.969275	0.969275	0.969275	0.969275	0.969275	0.969275	0.969275	0.969275	0.969275	0.969275	0.969275	0.969275	0.969275	0.969275	0.969275	0.969275	0.969275	0.969275	0.969275
[truncated: 57 more columns]
