# Supplementary material for: Testing the Two-Step Model of Plant Root Microbiome Acquisition Under Multiple Plant Species and Soil Sources
Source: Front Microbiol. 2020 Oct 9;11:542742. doi: 10.3389/fmicb.2020.542742 (PMC7581803; doi:10.3389/fmicb.2020.542742)
Supplement: Supplementary file 6 [file Table_5.XLSX]

## Sheet: Phylum relative abundance
Phylum	JAL1SI	JAL2SI	JAL3SI	JAL4SI	JAL5SI	NAY2SI	NAY3SI	GTO1SI	GTO2SI	GTO3SI	SIN1SI	SIN2SI	SLP1SI	AGS1SI	DGO1SI	ZAC1SI	JAL1FS	JAL2FS	JAL3FS	JAL4FS	JAL5FS	NAY2FS	NAY3FS	GTO1FS	GTO2FS	GTO3FS	SIN1FS	SIN2FS	SLP1FS	DGO1FS	ZAC1FS	JAL1US	JAL2US	JAL3US	JAL4US	JAL5US	NAY2US	NAY3US	GTO1US	GTO2US	GTO3US	SIN1US	SIN2US	SLP1US	AGS1US	DGO1US	ZAC1US	JAL1RT	JAL2RT
Alphaproteobacteria	21.38	23.82	14.29	20.68	21.85	16.22	21.51	10.28	18.13	15.24	21.23	23.57	20.43	20.01	23.85	15.03	17.42	23.56	12.27	26.76	20.65	15.37	25.03	13.89	21.24	22.7	29.61	29.29	22.48	20.11	22.39	21.28	19.8	14.41	26.83	32.87	15.53	22.02	15.73	20.99	23.09	27.7	24.31	32.41	19.51	16.12	26.7	22.66	29.03
Betaproteobacteria	1.32	1.07	1.09	1.58	2.41	0.84	1.93	1.87	1.3	1.83	1.11	1.14	1.74	2.26	2.8	0.66	2.41	2.02	2.54	2.03	2.96	1.01	1.53	1.8	1.96	2.4	0.56	1.53	2.15	1.3	0.47	2.33	1.95	2.13	2.06	3.13	1.05	1.31	1.63	0.85	2.53	0.11	2.05	1.84	1.68	1.15	0.26	3.77	2.85
Deltaproteobacteria	2.4	2.08	0.66	1.74	3.61	2.55	2.83	4.31	3.3	2.33	2.22	2.31	2.48	3.39	1.07	0.78	3.52	3.55	3.79	4.91	4.29	4.35	3.29	5.5	2.06	2.45	2.82	2.69	3.28	3.05	3.25	4.09	4.17	2.5	5.03	4.39	1.89	1.86	4.69	2.47	3.41	1.74	1.39	3.9	3.88	2.69	2.24	2.9	2.85
Gammaproteobacteria	1.13	3.3	0.44	0.93	2.1	0.73	1.04	1.28	2.18	1.19	0.95	0.9	2.06	2.74	1.4	0.48	2.34	2.78	0.92	1.88	2.72	1.76	1.62	2	3.32	1.86	0.87	2.24	2.62	1.24	1.55	2.42	2.83	0.41	2.06	3.04	0.61	1.14	2.1	2.12	2.34	0.71	1.95	3.02	2.42	1.63	1.59	2.03	4.86
Actinobacteria	38.6	34.25	34.92	33.44	22.97	16.48	24.04	29.16	33.86	35.84	28.13	31.07	35.27	28.25	35.49	37.03	20.42	20.86	22.54	16.36	17.85	18.14	25	15.95	22.09	26.95	28.74	21.66	20.07	23.33	25.1	23.42	19.56	25.98	19.79	14.33	20.09	31.16	16.56	22.89	20.3	45.64	20.73	35.08	27.73	21.84	20.13	18.84	13.71
Acidobacteria	9.32	6.76	9.31	10.66	11.98	17.47	11.16	18.17	12	13.12	13.25	8.29	10.18	13.91	6.78	17.76	18.02	13.25	17.49	12.48	16.36	8.92	10.28	23.22	16.69	14.88	8.47	8.93	17.06	16.85	8.89	14.73	14.75	13.29	9.36	11.62	9.31	7.44	21.03	14.89	19.26	6.71	6.69	6.26	13.86	11.94	13.05	14.14	11.34
Planctomycetes	14.03	9.54	23.21	16.28	13.41	12.74	16.16	15.71	12.99	9.65	18.97	10.66	11.71	9.71	14.14	6.52	14.91	9.78	17.95	12.93	9.07	8.96	8.8	14.98	15.45	4.96	15.61	11.95	11.93	17.05	3.7	10.79	11.5	20.4	12.11	8.12	9.07	8.39	17.05	16.65	10.02	4.8	11.82	5.34	9.77	12.98	3.8	11.77	10.68
Bacteroidetes	2.06	5.2	1.7	1.27	2.29	0.97	1	1.72	2.11	1.88	1.51	1.2	2.81	5.04	3.66	1.42	4.49	4.64	2.86	5.26	4.31	2.87	3.04	4.26	4.76	4.12	2.22	3.41	6.13	3.36	2.64	4.94	4.03	2.18	6.27	3	1.83	1.88	3.53	3.42	2.35	0.82	4.57	2.82	5.56	3.41	2.18	6.67	7.21
Chloroflexi	4.61	7.61	6.25	6.56	7.29	24.25	13.97	10.23	9.38	11.29	6.19	8.14	3.8	6.24	4.93	9.59	3.64	7.92	4.67	3.67	7.99	26.17	13.28	7.94	4.99	8.48	4.85	6.77	4.58	5.53	3.77	3.58	8.16	5.29	4.38	5.24	31.06	19.52	7.38	6.53	7.47	7.14	7.73	3.19	7.82	5.39	3.39	5.75	6.14
Cyanobacteria	0.05	0.15	0.17	0.37	0.43	0.99	0.15	0.05	0	0.07	0.36	0.36	0.02	0.11	0.21	0.83	0.07	1.28	0.14	0.32	0.96	2.21	0.16	0.34	0.37	0.07	0.23	0.45	0.18	2.43	0.9	0.13	1.84	0.09	0.88	6.16	1.92	0.08	0.61	1.83	0.19	0.27	5.73	0.22	0.09	17.26	1.78	0.16	1.84
Firmicutes	0.05	1.47	0.44	0.65	2.02	0.7	1.06	0.56	0.65	0.33	0.56	5.88	2.25	0.66	1.36	0.85	0.74	2.71	0.81	2.22	1.33	1	1.85	0.33	0.68	1.55	0.56	2.45	0.76	0.17	0.4	0.76	1.88	0.97	2.33	0.92	1.42	1.49	0.33	0.6	0.31	0.71	3.5	0.25	0.67	0.31	0.22	0.72	0.81
Gemmatimonadetes	1.08	1.96	2.93	1.49	2.57	1.72	1.92	3.2	1.39	2.74	3.1	3.6	1.48	2.12	0.86	1.89	4.87	3.8	6.39	2.79	3.83	1.75	2.42	5.25	2.8	3.84	2.78	4.14	3.19	2.01	16.57	2.95	4.67	6.47	2	2.5	1.31	0.82	4.5	3.1	4.38	1.91	4.46	2.17	3.44	2.06	7.04	3.25	2.97
TM7	1.47	0.28	1.09	1.18	1.35	1.67	0.58	0.21	0.58	0.86	0.79	0.69	1.37	1.07	1.48	3.61	0.81	0.62	0.85	2.69	0.7	3.29	0.71	0.45	0.52	1.81	0.87	0.67	1	0.52	6.94	0.55	0.3	0.43	1.06	0.59	2.24	0.56	0.78	0.71	0.14	1.25	0.26	0.82	0.68	0.37	14.35	1.51	1.03
Verrucomicrobia	1.18	1.07	1.75	1.77	1.88	0.97	1.42	1.23	1.3	1.33	0.44	0.99	2.85	2.25	0.49	0.35	4	1.28	2.86	2.53	1.9	1.69	0.8	1.62	1.26	1.19	0.68	1.35	2.37	1.51	0.47	5.77	1.81	3.16	2.54	1.27	0.69	0.83	1.72	1.16	1.44	0.16	2.26	1.14	1.5	1.29	0.27	3.28	2.09
Others	1.32	1.44	1.75	1.4	3.84	1.7	1.23	2.02	0.83	2.3	1.19	1.2	1.5	2.24	1.48	3.2	2.34	1.95	3.92	3.17	5.08	2.51	2.19	2.47	1.81	2.74	1.13	2.47	2.2	1.53	2.96	2.26	2.75	2.29	3.3	2.82	1.98	1.5	2.36	1.79	2.77	0.33	2.55	1.54	1.39	1.56	3	2.55	2.59
[truncated: 56 more columns]
