# Supplementary material for: Testing the Two-Step Model of Plant Root Microbiome Acquisition Under Multiple Plant Species and Soil Sources
Source: Front Microbiol. 2020 Oct 9;11:542742. doi: 10.3389/fmicb.2020.542742 (PMC7581803; doi:10.3389/fmicb.2020.542742)
Supplement: Supplementary file 7 [file Table_6.XLSX]

## Sheet: soil vs tomato rhizosphere
OTU	baseMean	log2FoldChange	lfcSE	stat	pvalue	padj	Kingdom	Phylum	Class	Order	Family	Genus	Species
1438192	44.3364	6.02656	0.781825	7.70831	1.2749e-14	2.5985e-10	k_Bacteria	p_Proteobacteria	c_Alphaproteobacteria	o_Sphingomonadales	f_Sphingomonadaceae	g_Sphingobium	s_
690400	3.21305	-3.51169	0.742554	-4.72921	2.25392e-06	0.00656277	k_Bacteria	p_Actinobacteria	c_Actinobacteria	o_Actinomycetales	f_Geodermatophilaceae	g_Geodermatophilus	s_
1437090	4.33577	3.59458	0.620806	5.79019	7.03067e-09	4.77664e-05	k_Bacteria	p_Proteobacteria	c_Alphaproteobacteria	o_Caulobacterales	f_Caulobacteraceae	g_Asticcacaulis	s_biprosthecium
1438568	6.59649	3.30462	0.610713	5.41109	6.26423e-08	0.000255355	k_Bacteria	p_Proteobacteria	c_Alphaproteobacteria	o_Caulobacterales	f_Caulobacteraceae	g_Caulobacter	s_henricii
1342510	4.15997	3.62428	0.747176	4.85064	1.23066e-06	0.00418055	k_Bacteria	p_Proteobacteria	c_Alphaproteobacteria	o_Caulobacterales	f_Caulobacteraceae	g_Arthrospira	s_
1433553	11.1746	3.8698	0.596142	6.49139	8.50453e-11	8.66697e-07	k_Bacteria	p_Proteobacteria	c_Alphaproteobacteria	o_Sphingomonadales	f_Erythrobacteraceae	g_	s_
1426854	129.266	2.25155	0.413256	5.44832	5.0849e-08	0.000255355	k_Bacteria	p_Proteobacteria	c_Alphaproteobacteria	o_Sphingomonadales	f_Sphingomonadaceae	g_Kaistobacter	s_

## Sheet: soil vs tomtato endosphere
	baseMean	log2FoldChange	lfcSE	stat	pvalue	padj	Kingdom	Phylum	Class	Order	Family	Genus	Species
1438192	43.21	6.6074	0.794594	8.31544	9.14107e-17	1.50215e-12	k_Bacteria	p_Proteobacteria	c_Alphaproteobacteria	o_Sphingomonadales	f_Sphingomonadaceae	g_Sphingobium	s_
1437090	20.2244	5.75301	0.703556	8.17704	2.90901e-16	2.39018e-12	k_Bacteria	p_Proteobacteria	c_Alphaproteobacteria	o_Caulobacterales	f_Caulobacteraceae	g_Asticcacaulis	s_biprosthecium
1438568	10.6096	4.05976	0.631207	6.43175	1.26145e-10	6.90978e-07	k_Bacteria	p_Proteobacteria	c_Alphaproteobacteria	o_Caulobacterales	f_Caulobacteraceae	g_Caulobacter	s_henricii
1351597	13.8489	3.3746	0.528819	6.38139	1.75487e-10	7.20946e-07	k_Bacteria	p_Proteobacteria	c_Alphaproteobacteria	o_Rhizobiales	f_Rhizobiaceae	g_	s_
1433553	10.3963	3.79894	0.643253	5.90582	3.50888e-09	8.23734e-06	k_Bacteria	p_Proteobacteria	c_Alphaproteobacteria	o_Sphingomonadales	f_Erythrobacteraceae	g_	s_
1342510	6.40343	4.34899	0.802101	5.42201	5.8934e-08	0.000121058	k_Bacteria	p_Proteobacteria	c_Alphaproteobacteria	o_Caulobacterales	f_Caulobacteraceae	g_Arthrospira	s_
29704	3.57377	4.24888	0.807242	5.26345	1.41376e-07	0.000232323	k_Bacteria	p_Proteobacteria	c_Deltaproteobacteria	o_Myxococcales	f_	g_	s_
1430874	11.4012	3.37661	0.685473	4.92595	8.39505e-07	0.00103025	k_Bacteria	p_Proteobacteria	c_Alphaproteobacteria	o_Rhizobiales	f_Rhizobiaceae	g_Agrobacterium	s_
354693	9.41808	4.90824	0.99736	4.92124	8.59982e-07	0.00103025	k_Bacteria	p_Bacteroidetes	c_Saprospirae	o_Saprospirales	f_Chitinophagaceae	g_Lacibacter	s_cauensis
1433205	17.146	3.19785	0.659828	4.84649	1.25663e-06	0.00129064	k_Bacteria	p_Proteobacteria	c_Alphaproteobacteria	o_Rhizobiales	f_Rhizobiaceae	g_Agrobacterium	s_
14427	5.04044	3.82303	0.81946	4.66531	3.08153e-06	0.00281326	k_Bacteria	p_Proteobacteria	c_Betaproteobacteria	o_Burkholderiales	f_Comamonadaceae	g_	s_
21034	3.7461	3.3428	0.740075	4.51683	6.2771e-06	0.00491198	k_Bacteria	p_Proteobacteria	c_Betaproteobacteria	o_Burkholderiales	f_Oxalobacteraceae	g_	s_
1450463	3.95619	4.17836	0.938752	4.45097	8.54818e-06	0.00630228	k_Bacteria	p_Chloroflexi	c_Chloroflexi	o_Herpetosiphonales	f_	g_	s_
1426854	104.294	1.80594	0.409877	4.40605	1.05271e-05	0.00720799	k_Bacteria	p_Proteobacteria	c_Alphaproteobacteria	o_Sphingomonadales	f_Sphingomonadaceae	g_Kaistobacter	s_
939846	3.08183	-2.71722	0.622203	-4.36709	1.25912e-05	0.00766336	k_Bacteria	p_Actinobacteria	c_Actinobacteria	o_Actinomycetales	f_Mycobacteriaceae	g_Mycobacterium	s_
365061	3.26188	-2.98013	0.681876	-4.37049	1.23968e-05	0.00766336	k_Bacteria	p_Actinobacteria	c_Actinobacteria	o_Actinomycetales	f_Pseudonocardiaceae	g_Pseudonocardia	s_
128	2.09849	-3.65573	0.832332	-4.39215	1.12235e-05	0.0073774	k_Bacteria	p_Acidobacteria	c_Acidobacteria-6	o_iii1-15	f_	g_	s_
693723	4.60134	-3.71987	0.837011	-4.44423	8.82081e-06	0.00630228	k_Bacteria	p_Actinobacteria	c_Actinobacteria	o_Actinomycetales	f_Geodermatophilaceae	g_Blastococcus	s_aggregatus
1348959	4.3861	-3.63423	0.794538	-4.57402	4.78459e-06	0.00393126	k_Bacteria	p_Chloroflexi	c_Ellin6529	o_	f_	g_	s_
1347496	4.73349	-3.19863	0.689113	-4.64166	3.45626e-06	0.0029893	k_Bacteria	p_Actinobacteria	c_Acidimicrobiia	o_Acidimicrobiales	f_EB1017	g_	s_
1427123	5.38435	-2.65825	0.552135	-4.8145	1.47567e-06	0.00142645	k_Bacteria	p_Proteobacteria	c_Alphaproteobacteria	o_Rhizobiales	f_Hyphomicrobiaceae	g_Rhodoplanes	s_
472465	5.48659	-3.5569	0.727567	-4.88876	1.01475e-06	0.00111169	k_Bacteria	p_Gemmatimonadetes	c_Gemm-1	o_	f_	g_	s_
1439235	6.01164	-4.04932	0.823493	-4.91724	8.77719e-07	0.00103025	k_Bacteria	p_Planctomycetes	c_Phycisphaerae	o_WD2101	f_	g_	s_
690400	2.49902	-3.905	0.779148	-5.01189	5.38984e-07	0.000805193	k_Bacteria	p_Actinobacteria	c_Actinobacteria	o_Actinomycetales	f_Geodermatophilaceae	g_Geodermatophilus	s_
941555	3.85157	-3.82631	0.713575	-5.36217	8.223e-08	0.000150143	k_Bacteria	p_Actinobacteria	c_Actinobacteria	o_Actinomycetales	f_Micromonosporaceae	g_Virgisporangium	s_ochraceum
937782	7.49487	-3.25181	0.541641	-6.00361	1.92973e-09	5.2852e-06	k_Bacteria	p_Actinobacteria	c_Actinobacteria	o_Actinomycetales	f_	g_	s_
538700	18.9572	-3.79915	0.610764	-6.22033	4.96104e-10	1.6305e-06	k_Bacteria	p_Actinobacteria	c_Actinobacteria	o_Actinomycetales	f_Geodermatophilaceae	g_	s_

## Sheet: soil vs ruderal rhizosphere
	baseMean	log2FoldChange	lfcSE	stat	pvalue	padj	Kingdom	Phylum	Class	Order	Family	Genus	Species
387126	13.0801	4.91678	0.741916	6.62714	3.42255e-11	2.33538e-07	k_Bacteria	p_Actinobacteria	c_Actinobacteria	o_Actinomycetales	f_Micromonosporaceae	g_	s_
391159	15.595	4.7277	0.808682	5.84617	5.03005e-09	1.14409e-05	k_Bacteria	p_Actinobacteria	c_Actinobacteria	o_Actinomycetales	f_Actinosynnemataceae	g_Lentzea	s_
395828	15.7361	4.61855	0.922174	5.00833	5.49058e-07	0.00044006	k_Bacteria	p_Actinobacteria	c_Actinobacteria	o_Actinomycetales	f_Pseudonocardiaceae	g_Amycolatopsis	s_
360375	32.6158	4.59012	0.61419	7.47346	7.81154e-14	1.06604e-09	k_Bacteria	p_Actinobacteria	c_Actinobacteria	o_Actinomycetales	f_Micromonosporaceae	g_Couchioplanes	s_
387602	21.3204	4.45654	0.678831	6.56502	5.20248e-11	2.36661e-07	k_Bacteria	p_Actinobacteria	c_Actinobacteria	o_Actinomycetales	f_Micromonosporaceae	g_Actinoplanes	s_brasiliensis
306052	10.1451	4.12932	0.816781	5.0556	4.2904e-07	0.000365945	k_Bacteria	p_Acidobacteria	c_Chloracidobacteria	o_RB41	f_	g_	s_
569135	5.95811	3.81727	0.785236	4.86131	1.16614e-06	0.000730311	k_Bacteria	p_Actinobacteria	c_Actinobacteria	o_Actinomycetales	f_Cryptosporangiaceae	g_Cryptosporangium	s_
392581	7.341	3.80634	0.904763	4.20701	2.58775e-05	0.0060888	k_Bacteria	p_Actinobacteria	c_Actinobacteria	o_Actinomycetales	f_Pseudonocardiaceae	g_Amycolatopsis	s_
1825	6.97604	3.80522	0.827995	4.59571	4.31281e-06	0.00168162	k_Bacteria	p_Proteobacteria	c_Betaproteobacteria	o_Burkholderiales	f_Comamonadaceae	g_	s_
1434	7.57001	3.76298	0.786319	4.78557	1.70504e-06	0.000831023	k_Bacteria	p_Proteobacteria	c_Betaproteobacteria	o_Burkholderiales	f_Comamonadaceae	g_	s_
497828	8.94416	3.57095	0.797143	4.47969	7.47518e-06	0.00237241	k_Bacteria	p_Actinobacteria	c_Actinobacteria	o_Actinomycetales	f_Geodermatophilaceae	g_Geodermatophilus	s_obscurus
386237	7.01456	3.44936	0.767984	4.49144	7.07426e-06	0.00229863	k_Bacteria	p_Actinobacteria	c_Actinobacteria	o_Actinomycetales	f_Geodermatophilaceae	g_Modestobacter	s_
388289	4.44902	3.41918	0.780821	4.37895	1.19254e-05	0.00361658	k_Bacteria	p_Actinobacteria	c_Actinobacteria	o_Actinomycetales	f_Micromonosporaceae	g_Actinoplanes	s_toevensis
690331	12.2465	3.28199	0.613764	5.34731	8.92706e-08	0.000135364	k_Bacteria	p_Actinobacteria	c_Actinobacteria	o_Actinomycetales	f_Micromonosporaceae	g_Dactylosporangium	s_
16985	12.329	3.15448	0.663964	4.75098	2.02431e-06	0.000952614	k_Bacteria	p_Proteobacteria	c_Betaproteobacteria	o_Burkholderiales	f_Comamonadaceae	g_	s_
1430874	23.8984	3.12901	0.692869	4.51602	6.30137e-06	0.00214987	k_Bacteria	p_Proteobacteria	c_Alphaproteobacteria	o_Rhizobiales	f_Rhizobiaceae	g_Agrobacterium	s_
694998	5.18067	3.02971	0.698135	4.33972	1.42662e-05	0.00405605	k_Bacteria	p_Actinobacteria	c_Actinobacteria	o_Actinomycetales	f_	g_	s_
519195	3.64089	2.98458	0.724761	4.11802	3.82142e-05	0.00827793	k_Bacteria	p_Actinobacteria	c_Actinobacteria	o_Actinomycetales	f_	g_	s_
351679	12.7237	2.96667	0.690098	4.29891	1.71637e-05	0.00450448	k_Bacteria	p_Actinobacteria	c_Actinobacteria	o_Actinomycetales	f_Micromonosporaceae	g_	s_
386880	25.8237	2.4063	0.500322	4.80951	1.513e-06	0.00079415	k_Bacteria	p_Actinobacteria	c_Actinobacteria	o_Actinomycetales	f_Streptomycetaceae	g_	s_
355337	74.0148	2.30563	0.50607	4.55595	5.21492e-06	0.00192346	k_Bacteria	p_Actinobacteria	c_Actinobacteria	o_Actinomycetales	f_Micromonosporaceae	g_Actinoplanes	s_
1432690	120.877	-2.13108	0.444098	-4.79867	1.59721e-06	0.000807302	k_Bacteria	p_Proteobacteria	c_Alphaproteobacteria	o_Rhizobiales	f_Bradyrhizobiaceae	g_	s_
1432877	9.23791	-2.20355	0.53561	-4.1141	3.88693e-05	0.00828827	k_Bacteria	p_Proteobacteria	c_Alphaproteobacteria	o_Rhizobiales	f_Hyphomicrobiaceae	g_Rhodoplanes	s_
939846	9.08413	-2.3165	0.538459	-4.30209	1.69197e-05	0.00450448	k_Bacteria	p_Actinobacteria	c_Actinobacteria	o_Actinomycetales	f_Mycobacteriaceae	g_Mycobacterium	s_
1546555	6.72061	-2.36368	0.563358	-4.19571	2.72024e-05	0.00619796	k_Bacteria	p_Planctomycetes	c_Phycisphaerae	o_WD2101	f_	g_	s_
690290	12.6793	-2.52761	0.49366	-5.12013	3.0532e-07	0.000320516	k_Bacteria	p_Actinobacteria	c_Actinobacteria	o_Actinomycetales	f_Micromonosporaceae	g_Micromonospora	s_carbonacea
692802	3.37323	-2.85084	0.666624	-4.27654	1.89823e-05	0.00488777	k_Bacteria	p_Actinobacteria	c_Actinobacteria	o_Actinomycetales	f_Geodermatophilaceae	g_	s_
1350837	13.0697	-2.94176	0.581033	-5.06297	4.12765e-07	0.000365945	k_Bacteria	p_Chloroflexi	c_Ellin6529	o_	f_	g_	s_
1347494	4.81417	-3.01824	0.666018	-4.53177	5.84922e-06	0.00208807	k_Bacteria	p_Actinobacteria	c_Acidimicrobiia	o_Acidimicrobiales	f_	g_	s_
1346715	10.3344	-3.26324	0.65296	-4.99762	5.80427e-07	0.00044006	k_Bacteria	p_Actinobacteria	c_Acidimicrobiia	o_Acidimicrobiales	f_	g_	s_
1430706	2.31358	-3.33895	0.807209	-4.13642	3.52773e-05	0.007765	k_Bacteria	p_Actinobacteria	c_Acidimicrobiia	o_Acidimicrobiales	f_	g_	s_
944138	3.20584	-3.43201	0.730981	-4.69507	2.6651e-06	0.00113658	k_Bacteria	p_Actinobacteria	c_Actinobacteria	o_Actinomycetales	f_Nocardioidaceae	g_	s_
228879	3.7243	-3.47109	0.852752	-4.07046	4.69202e-05	0.00970181	k_Bacteria	p_Actinobacteria	c_Thermoleophilia	o_Gaiellales	f_Gaiellaceae	g_	s_
1500120	7.16731	-3.51016	0.833854	-4.20956	2.55863e-05	0.0060888	k_Bacteria	p_Proteobacteria	c_Alphaproteobacteria	o_Rhizobiales	f_	g_	s_
1310882	5.47691	-3.51543	0.711241	-4.94267	7.70609e-07	0.000525825	k_Bacteria	p_Actinobacteria	c_Acidimicrobiia	o_Acidimicrobiales	f_	g_	s_
691950	6.20324	-3.7021	0.79892	-4.63387	3.58884e-06	0.0014405	k_Bacteria	p_Actinobacteria	c_Actinobacteria	o_Actinomycetales	f_Micrococcaceae	g_	s_
73658	3.06442	-3.7106	0.798661	-4.64602	3.38395e-06	0.00139942	k_Bacteria	p_Proteobacteria	c_Gammaproteobacteria	o_Xanthomonadales	f_Sinobacteraceae	g_Steroidobacter	s_
1534196	1.57645	-3.85742	0.909455	-4.24147	2.22064e-05	0.00551001	k_Bacteria	p_Proteobacteria	c_Alphaproteobacteria	o_Rhizobiales	f_	g_	s_
1313127	2.81497	-3.8685	0.894781	-4.3234	1.53642e-05	0.00427909	k_Bacteria	p_Actinobacteria	c_Acidimicrobiia	o_Acidimicrobiales	f_AKIW874	g_	s_
1432638	8.22689	-3.90323	0.825746	-4.72691	2.27959e-06	0.00100825	k_Bacteria	p_Chloroflexi	c_Gitt-GS-136	o_	f_	g_	s_
1431011	2.2364	-3.92043	0.960776	-4.08048	4.49419e-05	0.00943572	k_Bacteria	p_Actinobacteria	c_Acidimicrobiia	o_Acidimicrobiales	f_EB1017	g_	s_
1507052	2.87886	-3.96134	0.895692	-4.42265	9.74958e-06	0.00302392	k_Bacteria	p_Planctomycetes	c_Phycisphaerae	o_WD2101	f_	g_	s_
71878	3.16802	-3.96542	0.921397	-4.30371	1.67963e-05	0.00450448	k_Bacteria	p_Actinobacteria	c_Thermoleophilia	o_Solirubrobacterales	f_Solirubrobacteraceae	g_	s_
941857	5.94148	-4.10622	0.791489	-5.18797	2.12598e-07	0.000241777	k_Bacteria	p_Actinobacteria	c_Actinobacteria	o_Actinomycetales	f_Micrococcaceae	g_	s_
1506998	2.37975	-4.23863	0.880382	-4.81453	1.47544e-06	0.00079415	k_Bacteria	p_Chloroflexi	c_Ellin6529	o_	f_	g_	s_
1150548	1.65601	-4.26078	1.00381	-4.24462	2.18961e-05	0.00551001	k_Bacteria	p_Actinobacteria	c_Actinobacteria	o_Actinomycetales	f_Geodermatophilaceae	g_Geodermatophilus	s_obscurus
229119	2.51628	-4.30997	1.03657	-4.15791	3.21175e-05	0.00718537	k_Bacteria	p_Actinobacteria	c_Thermoleophilia	o_Gaiellales	f_Gaiellaceae	g_	s_
1439235	13.4432	-4.42545	0.867271	-5.10273	3.34795e-07	0.000326353	k_Bacteria	p_Planctomycetes	c_Phycisphaerae	o_WD2101	f_	g_	s_
944147	1.89571	-4.42551	1.01596	-4.35601	1.32458e-05	0.00392967	k_Bacteria	p_Actinobacteria	c_Actinobacteria	o_Actinomycetales	f_Nocardioidaceae	g_	s_
1507196	3.35822	-4.44912	0.917229	-4.85061	1.23083e-06	0.000730311	k_Bacteria	p_Proteobacteria	c_Alphaproteobacteria	o_Rhodospirillales	f_Rhodospirillaceae	g_	s_
229423	3.66751	-4.56248	0.858653	-5.31353	1.07519e-07	0.000146732	k_Bacteria	p_Actinobacteria	c_Thermoleophilia	o_Gaiellales	f_Gaiellaceae	g_	s_
1439035	1.17054	-4.61183	1.09501	-4.21169	2.5347e-05	0.0060888	k_Bacteria	p_Actinobacteria	c_Acidimicrobiia	o_Acidimicrobiales	f_	g_	s_
1544144	1.49334	-4.70912	1.12247	-4.19531	2.72498e-05	0.00619796	k_Bacteria	p_Planctomycetes	c_Phycisphaerae	o_WD2101	f_	g_	s_
940028	1.99255	-4.87059	1.00364	-4.85294	1.21644e-06	0.000730311	k_Bacteria	p_Actinobacteria	c_Actinobacteria	o_Actinomycetales	f_Micrococcaceae	g_	s_
1495151	3.37134	-4.91901	0.808286	-6.08574	1.15957e-09	3.95617e-06	k_Bacteria	p_Chloroflexi	c_Ellin6529	o_	f_	g_	s_
1127227	1.2062	-4.92964	1.13384	-4.34774	1.37545e-05	0.00399378	k_Bacteria	p_Actinobacteria	c_Actinobacteria	o_Actinomycetales	f_Micrococcaceae	g_	s_
1838840	1.30422	-4.96318	1.05019	-4.72596	2.29029e-06	0.00100825	k_Bacteria	p_Actinobacteria	c_Actinobacteria	o_Actinomycetales	f_Micromonosporaceae	g_Verrucosispora	s_gifhornensis
1757905	1.51297	-5.07065	1.12566	-4.50462	6.64923e-06	0.00221322	k_Bacteria	p_Actinobacteria	c_Actinobacteria	o_Actinomycetales	f_Micromonosporaceae	g_Actinoplanes	s_
1867343	1.33112	-5.08145	1.11504	-4.55718	5.18455e-06	0.00192346	k_Bacteria	p_Actinobacteria	c_Actinobacteria	o_Actinomycetales	f_Cryptosporangiaceae	g_Cryptosporangium	s_
1518474	1.84837	-5.13454	1.0307	-4.98161	6.30581e-07	0.000452923	k_Bacteria	p_Chloroflexi	c_Ellin6529	o_	f_	g_	s_
1870356	1.87553	-5.3094	1.17269	-4.52755	5.96724e-06	0.00208807	k_Bacteria	p_Actinobacteria	c_Actinobacteria	o_Actinomycetales	f_Intrasporangiaceae	g_Knoellia	s_subterranea
1146927	1.76882	-5.37897	1.11275	-4.83392	1.33868e-06	0.000761207	k_Bacteria	p_Actinobacteria	c_Actinobacteria	o_Actinomycetales	f_Geodermatophilaceae	g_	s_
1139374	2.38574	-5.4321	0.941356	-5.77051	7.90341e-09	1.54083e-05	k_Bacteria	p_Actinobacteria	c_Actinobacteria	o_Actinomycetales	f_Micromonosporaceae	g_	s_
1756728	2.23468	-5.62776	1.063	-5.29422	1.19525e-07	0.000148286	k_Bacteria	p_Actinobacteria	c_Actinobacteria	o_Actinomycetales	f_Geodermatophilaceae	g_Geodermatophilus	s_obscurus
1555290	1.95622	-5.65721	1.00149	-5.64876	1.61608e-08	2.75683e-05	k_Bacteria	p_Planctomycetes	c_Phycisphaerae	o_WD2101	f_	g_	s_
1793525	2.1663	-5.84334	0.980002	-5.96258	2.48287e-09	6.77675e-06	k_Bacteria	p_Chloroflexi	c_Ellin6529	o_	f_	g_	s_

## Sheet: soil vs ruderal endosphere
OTU	baseMean	log2FoldChange	lfcSE	stat	pvalue	padj	Kingdom	Phylum	Class	Order	Family	Genus	Species
391159	50.1054	6.52354	0.911073	7.16029	8.05093e-13	5.47303e-09	k_Bacteria	p_Actinobacteria	c_Actinobacteria	o_Actinomycetales	f_Actinosynnemataceae	g_Lentzea	s_
1825	15.8555	5.17508	0.872264	5.93293	2.9758e-09	4.04589e-06	k_Bacteria	p_Proteobacteria	c_Betaproteobacteria	o_Burkholderiales	f_Comamonadaceae	g_	s_
387126	12.043	5.0604	0.764373	6.62034	3.58379e-11	1.62418e-07	k_Bacteria	p_Actinobacteria	c_Actinobacteria	o_Actinomycetales	f_Micromonosporaceae	g_	s_
1589	14.6266	4.8653	1.10037	4.4215	9.8019e-06	0.00214946	k_Bacteria	p_Proteobacteria	c_Gammaproteobacteria	o_Pseudomonadales	f_Pseudomonadaceae	g_Pseudomonas	s_viridiflava
360375	32.1426	4.80262	0.659897	7.27783	3.39223e-13	4.61207e-09	k_Bacteria	p_Actinobacteria	c_Actinobacteria	o_Actinomycetales	f_Micromonosporaceae	g_Couchioplanes	s_
388289	10.5215	4.78216	0.901608	5.30404	1.1327e-07	8.10536e-05	k_Bacteria	p_Actinobacteria	c_Actinobacteria	o_Actinomycetales	f_Micromonosporaceae	g_Actinoplanes	s_toevensis
1434	12.7997	4.74146	0.814245	5.82314	5.77527e-09	6.04005e-06	k_Bacteria	p_Proteobacteria	c_Betaproteobacteria	o_Burkholderiales	f_Comamonadaceae	g_	s_
395828	10.5697	4.45125	0.869147	5.1214	3.03273e-07	0.000161231	k_Bacteria	p_Actinobacteria	c_Actinobacteria	o_Actinomycetales	f_Pseudonocardiaceae	g_Amycolatopsis	s_
413940	14.6083	4.44527	0.870387	5.10723	3.2692e-07	0.000164622	k_Bacteria	p_Actinobacteria	c_Actinobacteria	o_Actinomycetales	f_Kineosporiaceae	g_	s_
387602	17.3649	4.4064	0.685365	6.42927	1.28217e-10	2.45281e-07	k_Bacteria	p_Actinobacteria	c_Actinobacteria	o_Actinomycetales	f_Micromonosporaceae	g_Actinoplanes	s_brasiliensis
886	6.43876	3.98768	0.790599	5.04388	4.56188e-07	0.000206745	k_Bacteria	p_Acidobacteria	c_Acidobacteria-6	o_iii1-15	f_	g_	s_
14450	6.21037	3.93071	0.80783	4.86576	1.14017e-06	0.000442907	k_Bacteria	p_Proteobacteria	c_Betaproteobacteria	o_Burkholderiales	f_Comamonadaceae	g_Methylibium	s_
470185	5.48537	3.86358	0.961497	4.01829	5.86219e-05	0.00781395	k_Bacteria	p_Actinobacteria	c_Actinobacteria	o_Actinomycetales	f_Actinosynnemataceae	g_Lentzea	s_
306052	6.86233	3.85471	0.826827	4.66205	3.1307e-06	0.000967386	k_Bacteria	p_Acidobacteria	c_Chloracidobacteria	o_RB41	f_	g_	s_
2454	6.71095	3.82248	0.86168	4.43608	9.16133e-06	0.00211114	k_Bacteria	p_Proteobacteria	c_Betaproteobacteria	o_Burkholderiales	f_Comamonadaceae	g_Roseateles	s_depolymerans
411268	5.26056	3.81081	0.950129	4.01084	6.05042e-05	0.00793329	k_Bacteria	p_Actinobacteria	c_Actinobacteria	o_Actinomycetales	f_Micrococcaceae	g_Arthrobacter	s_
1347585	9.9839	3.73828	0.764901	4.88728	1.02239e-06	0.000408835	k_Bacteria	p_Proteobacteria	c_Alphaproteobacteria	o_Rhizobiales	f_Rhizobiaceae	g_Rhizobium	s_
392581	5.31843	3.67171	0.904941	4.0574	4.96215e-05	0.00714251	k_Bacteria	p_Actinobacteria	c_Actinobacteria	o_Actinomycetales	f_Pseudonocardiaceae	g_Amycolatopsis	s_
470402	11.4696	3.64405	0.877549	4.15253	3.28822e-05	0.00532222	k_Bacteria	p_Actinobacteria	c_Actinobacteria	o_Actinomycetales	f_Streptomycetaceae	g_Streptomyces	s_
3252	5.60032	3.60569	0.7621	4.73126	2.23132e-06	0.000722311	k_Bacteria	p_Proteobacteria	c_Betaproteobacteria	o_Burkholderiales	f_Comamonadaceae	g_	s_
386880	46.7151	3.56589	0.553339	6.4443	1.16132e-10	2.45281e-07	k_Bacteria	p_Actinobacteria	c_Actinobacteria	o_Actinomycetales	f_Streptomycetaceae	g_	s_
569135	3.7871	3.45095	0.789963	4.3685	1.25104e-05	0.00250135	k_Bacteria	p_Actinobacteria	c_Actinobacteria	o_Actinomycetales	f_Cryptosporangiaceae	g_Cryptosporangium	s_
1430874	22.9978	3.22096	0.588456	5.47357	4.4106e-08	3.99776e-05	k_Bacteria	p_Proteobacteria	c_Alphaproteobacteria	o_Rhizobiales	f_Rhizobiaceae	g_Agrobacterium	s_
1342510	5.41034	3.17119	0.779243	4.06958	4.70974e-05	0.00688533	k_Bacteria	p_Proteobacteria	c_Alphaproteobacteria	o_Caulobacterales	f_Caulobacteraceae	g_Arthrospira	s_
16504	9.03868	2.9783	0.710756	4.19033	2.78545e-05	0.00467543	k_Bacteria	p_Proteobacteria	c_Betaproteobacteria	o_Burkholderiales	f_Comamonadaceae	g_Methylibium	s_
21121	9.60511	2.95609	0.724312	4.08123	4.47982e-05	0.00669315	k_Bacteria	p_Proteobacteria	c_Betaproteobacteria	o_Burkholderiales	f_Comamonadaceae	g_Xenophilus	s_aerolatus
16985	9.58152	2.94781	0.683812	4.31085	1.62626e-05	0.00307092	k_Bacteria	p_Proteobacteria	c_Betaproteobacteria	o_Burkholderiales	f_Comamonadaceae	g_	s_
392075	17.9366	2.78354	0.612719	4.54292	5.54797e-06	0.0015086	k_Bacteria	p_Actinobacteria	c_Actinobacteria	o_Actinomycetales	f_Streptomycetaceae	g_Streptomyces	s_
1351597	18.7732	2.38147	0.601197	3.96122	7.45693e-05	0.00921677	k_Bacteria	p_Proteobacteria	c_Alphaproteobacteria	o_Rhizobiales	f_Rhizobiaceae	g_	s_
355337	55.6262	2.11504	0.517592	4.08631	4.38294e-05	0.00662117	k_Bacteria	p_Actinobacteria	c_Actinobacteria	o_Actinomycetales	f_Micromonosporaceae	g_Actinoplanes	s_
1347353	28.654	1.98223	0.445223	4.45221	8.49911e-06	0.00202726	k_Bacteria	p_Proteobacteria	c_Alphaproteobacteria	o_Sphingomonadales	f_Sphingomonadaceae	g_Kaistobacter	s_
937782	25.5854	-1.60722	0.402054	-3.99753	6.40061e-05	0.00813297	k_Bacteria	p_Actinobacteria	c_Actinobacteria	o_Actinomycetales	f_	g_	s_
1432385	40.5806	-1.85237	0.394033	-4.70105	2.58831e-06	0.000818389	k_Bacteria	p_Planctomycetes	c_Phycisphaerae	o_WD2101	f_	g_	s_
1432690	132.492	-1.96321	0.467042	-4.20351	2.6281e-05	0.00446646	k_Bacteria	p_Proteobacteria	c_Alphaproteobacteria	o_Rhizobiales	f_Bradyrhizobiaceae	g_	s_
939846	10.373	-2.08311	0.524284	-3.97325	7.08997e-05	0.0088436	k_Bacteria	p_Actinobacteria	c_Actinobacteria	o_Actinomycetales	f_Mycobacteriaceae	g_Mycobacterium	s_
693793	6.97002	-2.11386	0.537823	-3.9304	8.4804e-05	0.00993962	k_Bacteria	p_Actinobacteria	c_Actinobacteria	o_Actinomycetales	f_Geodermatophilaceae	g_Modestobacter	s_
1435766	11.5622	-2.26958	0.545843	-4.15794	3.21135e-05	0.00526043	k_Bacteria	p_Proteobacteria	c_Alphaproteobacteria	o_Rhodospirillales	f_Rhodospirillaceae	g_	s_
1347496	16.6393	-2.42809	0.60366	-4.02229	5.76356e-05	0.00775855	k_Bacteria	p_Actinobacteria	c_Acidimicrobiia	o_Acidimicrobiales	f_EB1017	g_	s_
1441661	13.519	-2.46859	0.625281	-3.94796	7.88187e-05	0.00948335	k_Bacteria	p_Proteobacteria	c_Alphaproteobacteria	o_Rhizobiales	f_Methylobacteriaceae	g_Methylobacterium	s_
1350782	10.8318	-2.53602	0.593495	-4.27303	1.92836e-05	0.00349574	k_Bacteria	p_Actinobacteria	c_Acidimicrobiia	o_Acidimicrobiales	f_C111	g_	s_
1350837	14.4629	-2.77215	0.657495	-4.21624	2.48412e-05	0.0042752	k_Bacteria	p_Chloroflexi	c_Ellin6529	o_	f_	g_	s_
1427952	6.32934	-2.78307	0.650378	-4.27916	1.87604e-05	0.00344684	k_Bacteria	p_Proteobacteria	c_Alphaproteobacteria	o_Rhizobiales	f_Hyphomicrobiaceae	g_Rhodoplanes	s_
1546555	6.81693	-2.83947	0.588237	-4.82709	1.38545e-06	0.0004957	k_Bacteria	p_Planctomycetes	c_Phycisphaerae	o_WD2101	f_	g_	s_
690290	13.8024	-2.91868	0.537071	-5.43445	5.49658e-08	4.39597e-05	k_Bacteria	p_Actinobacteria	c_Actinobacteria	o_Actinomycetales	f_Micromonosporaceae	g_Micromonospora	s_carbonacea
1346715	10.8085	-3.00049	0.752162	-3.98916	6.63084e-05	0.00834749	k_Bacteria	p_Actinobacteria	c_Acidimicrobiia	o_Acidimicrobiales	f_	g_	s_
1347313	2.86933	-3.20595	0.766193	-4.18426	2.86091e-05	0.00474352	k_Bacteria	p_Actinobacteria	c_Acidimicrobiia	o_Acidimicrobiales	f_	g_	s_
1430706	2.59773	-3.26939	0.73628	-4.44042	8.97834e-06	0.00210465	k_Bacteria	p_Actinobacteria	c_Acidimicrobiia	o_Acidimicrobiales	f_	g_	s_
1500120	7.78922	-3.30001	0.817869	-4.03489	5.46285e-05	0.00760157	k_Bacteria	p_Proteobacteria	c_Alphaproteobacteria	o_Rhizobiales	f_	g_	s_
1503132	2.65547	-3.45793	0.806019	-4.29013	1.78568e-05	0.00332578	k_Bacteria	p_Proteobacteria	c_Alphaproteobacteria	o_Rhizobiales	f_Hyphomicrobiaceae	g_Rhodoplanes	s_
1839	3.8042	-3.5396	0.896374	-3.9488	7.85441e-05	0.00948335	k_Bacteria	p_Acidobacteria	c_Acidobacteria-6	o_iii1-15	f_	g_	s_
228879	4.09911	-3.58705	0.870303	-4.12161	3.76233e-05	0.00594798	k_Bacteria	p_Actinobacteria	c_Thermoleophilia	o_Gaiellales	f_Gaiellaceae	g_	s_
1507052	3.22047	-3.617	0.834418	-4.33476	1.45919e-05	0.00287524	k_Bacteria	p_Planctomycetes	c_Phycisphaerae	o_WD2101	f_	g_	s_
944138	3.0624	-3.64938	0.752811	-4.84768	1.24916e-06	0.000471765	k_Bacteria	p_Actinobacteria	c_Actinobacteria	o_Actinomycetales	f_Nocardioidaceae	g_	s_
1507196	3.719	-3.68518	0.852009	-4.32527	1.52342e-05	0.00295892	k_Bacteria	p_Proteobacteria	c_Alphaproteobacteria	o_Rhodospirillales	f_Rhodospirillaceae	g_	s_
940342	1.24579	-3.71173	0.942151	-3.93964	8.16038e-05	0.00973233	k_Bacteria	p_Actinobacteria	c_Actinobacteria	o_Actinomycetales	f_Cryptosporangiaceae	g_Cryptosporangium	s_
1310882	5.73175	-3.77094	0.842579	-4.47547	7.62443e-06	0.00187003	k_Bacteria	p_Actinobacteria	c_Acidimicrobiia	o_Acidimicrobiales	f_	g_	s_
251298	4.1523	-3.77482	0.856177	-4.40893	1.03884e-05	0.00224193	k_Bacteria	p_Acidobacteria	c_Chloracidobacteria	o_RB41	f_	g_	s_
1437199	1.96841	-3.77594	0.959727	-3.93439	8.34096e-05	0.00986119	k_Bacteria	p_Actinobacteria	c_Acidimicrobiia	o_Acidimicrobiales	f_	g_	s_
1432638	8.80738	-3.88934	0.807633	-4.81573	1.46662e-06	0.000498504	k_Bacteria	p_Chloroflexi	c_Gitt-GS-136	o_	f_	g_	s_
1534196	1.78207	-3.95003	0.934217	-4.22817	2.35602e-05	0.00410673	k_Bacteria	p_Proteobacteria	c_Alphaproteobacteria	o_Rhizobiales	f_	g_	s_
691950	6.50926	-3.95837	0.739916	-5.34975	8.80766e-08	6.65272e-05	k_Bacteria	p_Actinobacteria	c_Actinobacteria	o_Actinomycetales	f_Micrococcaceae	g_	s_
1506998	2.56468	-3.98029	0.906809	-4.38934	1.13694e-05	0.00237813	k_Bacteria	p_Chloroflexi	c_Ellin6529	o_	f_	g_	s_
941857	6.40833	-3.9932	0.784912	-5.08746	3.62896e-07	0.000176212	k_Bacteria	p_Actinobacteria	c_Actinobacteria	o_Actinomycetales	f_Micrococcaceae	g_	s_
1350957	1.94198	-4.02606	1.01819	-3.95412	7.68176e-05	0.00940912	k_Bacteria	p_Actinobacteria	c_Acidimicrobiia	o_Acidimicrobiales	f_	g_	s_
939912	3.86797	-4.06851	0.87679	-4.64024	3.48012e-06	0.00105146	k_Bacteria	p_Actinobacteria	c_Actinobacteria	o_Actinomycetales	f_Micromonosporaceae	g_Catellatospora	s_
1350979	2.53963	-4.11072	1.02508	-4.01013	6.06842e-05	0.00793329	k_Bacteria	p_Actinobacteria	c_Acidimicrobiia	o_Acidimicrobiales	f_	g_	s_
229423	4.25693	-4.22639	0.944806	-4.47329	7.70238e-06	0.00187003	k_Bacteria	p_Actinobacteria	c_Thermoleophilia	o_Gaiellales	f_Gaiellaceae	g_	s_
1518474	2.18893	-4.26652	0.951695	-4.48308	7.35748e-06	0.00185245	k_Bacteria	p_Chloroflexi	c_Ellin6529	o_	f_	g_	s_
1446393	2.17261	-4.35846	1.07456	-4.05606	4.99072e-05	0.00714251	k_Bacteria	p_Planctomycetes	c_Phycisphaerae	o_WD2101	f_	g_	s_
1439658	2.53891	-4.45414	0.846991	-5.25878	1.45014e-07	8.96189e-05	k_Bacteria	p_Proteobacteria	c_Alphaproteobacteria	o_Sphingomonadales	f_Sphingomonadaceae	g_	s_
1530364	1.77858	-4.4635	1.08743	-4.10463	4.04954e-05	0.00625654	k_Bacteria	p_Chloroflexi	c_Anaerolineae	o_S0208	f_	g_	s_
228923	3.32163	-4.51656	1.04669	-4.31507	1.5955e-05	0.00305527	k_Bacteria	p_Acidobacteria	c_Acidobacteria-6	o_iii1-15	f_	g_	s_
142482	1.35304	-4.54664	1.13644	-4.00078	6.31336e-05	0.00813297	k_Bacteria	p_Actinobacteria	c_Thermoleophilia	o_Gaiellales	f_Gaiellaceae	g_	s_
1493434	13.3507	-4.59857	0.952573	-4.82752	1.38243e-06	0.0004957	k_Bacteria	p_Planctomycetes	c_Phycisphaerae	o_WD2101	f_	g_	s_
73658	3.29418	-4.62235	0.84628	-5.46197	4.70891e-08	4.00139e-05	k_Bacteria	p_Proteobacteria	c_Gammaproteobacteria	o_Xanthomonadales	f_Sinobacteraceae	g_Steroidobacter	s_
71878	3.47001	-4.68545	1.01721	-4.60616	4.10174e-06	0.00118654	k_Bacteria	p_Actinobacteria	c_Thermoleophilia	o_Solirubrobacterales	f_Solirubrobacteraceae	g_	s_
1439035	1.32077	-4.69741	1.06147	-4.42537	9.62793e-06	0.00214592	k_Bacteria	p_Actinobacteria	c_Acidimicrobiia	o_Acidimicrobiales	f_	g_	s_
1344737	8.42451	-4.75955	1.08821	-4.37373	1.22142e-05	0.00247856	k_Bacteria	p_Acidobacteria	c_Chloracidobacteria	o_PK29	f_	g_	s_
1905	2.83652	-4.79864	1.03949	-4.61634	3.90574e-06	0.0011544	k_Bacteria	p_Acidobacteria	c_Acidobacteria-6	o_iii1-15	f_mb2424	g_	s_
1156289	1.49083	-4.85367	1.20014	-4.04424	5.24927e-05	0.00743428	k_Bacteria	p_Actinobacteria	c_Actinobacteria	o_Actinomycetales	f_Streptomycetaceae	g_Streptomyces	s_
1543951	1.19971	-4.90615	1.21758	-4.02944	5.59103e-05	0.00760157	k_Bacteria	p_Proteobacteria	c_Alphaproteobacteria	o_Rhizobiales	f_Hyphomicrobiaceae	g_Rhodoplanes	s_
944147	1.84728	-4.91846	0.980997	-5.01373	5.33845e-07	0.000233761	k_Bacteria	p_Actinobacteria	c_Actinobacteria	o_Actinomycetales	f_Nocardioidaceae	g_	s_
1144011	1.67242	-4.92731	1.18895	-4.14426	3.40915e-05	0.00545304	k_Bacteria	p_Armatimonadetes	c_Chthonomonadetes	o_SJA-22	f_	g_	s_
1124709	2.33602	-4.99649	1.10876	-4.50636	6.59481e-06	0.00172429	k_Bacteria	p_Actinobacteria	c_Actinobacteria	o_Actinomycetales	f_Micromonosporaceae	g_Dactylosporangium	s_
1346868	1.07998	-5.01171	1.23039	-4.07327	4.63572e-05	0.00685078	k_Bacteria	p_Actinobacteria	c_Acidimicrobiia	o_Acidimicrobiales	f_	g_	s_
1446534	3.36973	-5.11582	1.03047	-4.96456	6.88561e-07	0.000283687	k_Bacteria	p_Proteobacteria	c_Alphaproteobacteria	o_Sphingomonadales	f_Sphingomonadaceae	g_Kaistobacter	s_
2218313	1.05989	-5.11671	1.26917	-4.03154	5.54126e-05	0.00760157	k_Bacteria	p_Planctomycetes	c_Phycisphaerae	o_WD2101	f_	g_	s_
187436	3.62338	-5.12716	1.25428	-4.08773	4.35607e-05	0.00662117	k_Bacteria	p_Actinobacteria	c_Thermoleophilia	o_Gaiellales	f_Gaiellaceae	g_	s_
1342493	6.01118	-5.24039	1.02386	-5.11828	3.08327e-07	0.000161231	k_Bacteria	p_Actinobacteria	c_Acidimicrobiia	o_Acidimicrobiales	f_AKIW874	g_	s_
1785461	0.977621	-5.24809	1.27432	-4.11834	3.81607e-05	0.00596359	k_Bacteria	p_Actinobacteria	c_Actinobacteria	o_Actinomycetales	f_Nocardioidaceae	g_	s_
477398	1.08952	-5.26545	1.31693	-3.99828	6.38044e-05	0.00813297	k_Bacteria	p_Acidobacteria	c_Acidobacteria-6	o_iii1-15	f_	g_	s_
1544414	1.24154	-5.27723	1.20213	-4.38991	1.134e-05	0.00237813	k_Bacteria	p_Chloroflexi	c_TK10	o_B07_WMSP1	f_	g_	s_
2221567	0.948138	-5.28157	1.23766	-4.26737	1.97788e-05	0.00353833	k_Bacteria	p_Chloroflexi	c_Ellin6529	o_	f_	g_	s_
1350107	3.18982	-5.30536	1.31632	-4.03044	5.56715e-05	0.00760157	k_Bacteria	p_Planctomycetes	c_Planctomycetia	o_Gemmatales	f_Gemmataceae	g_Gemmata	s_
1758701	1.21603	-5.34731	1.25436	-4.26296	2.01734e-05	0.00356205	k_Bacteria	p_Actinobacteria	c_Actinobacteria	o_Actinomycetales	f_Micromonosporaceae	g_Virgisporangium	s_ochraceum
1150548	1.74488	-5.37526	1.06436	-5.05025	4.41238e-07	0.000206745	k_Bacteria	p_Actinobacteria	c_Actinobacteria	o_Actinomycetales	f_Geodermatophilaceae	g_Geodermatophilus	s_obscurus
2197957	1.05382	-5.39053	1.21714	-4.42884	9.47402e-06	0.00214592	k_Bacteria	p_Chloroflexi	c_Ellin6529	o_	f_	g_	s_
1452894	1.25807	-5.40269	1.19483	-4.52174	6.13348e-06	0.00163511	k_Bacteria	p_Actinobacteria	c_Actinobacteria	o_Actinomycetales	f_Geodermatophilaceae	g_Geodermatophilus	s_
939325	2.80625	-5.466	0.992535	-5.50711	3.64777e-08	3.54251e-05	k_Bacteria	p_Actinobacteria	c_Actinobacteria	o_Actinomycetales	f_Micromonosporaceae	g_Pilimelia	s_
1865045	1.17362	-5.47079	1.25063	-4.37441	1.21759e-05	0.00247856	k_Bacteria	p_Actinobacteria	c_Actinobacteria	o_Actinomycetales	f_Micrococcaceae	g_	s_
1127227	1.27155	-5.50348	1.14155	-4.82107	1.42788e-06	0.000497782	k_Bacteria	p_Actinobacteria	c_Actinobacteria	o_Actinomycetales	f_Micrococcaceae	g_	s_
1544144	1.7239	-5.55105	1.16936	-4.74708	2.06373e-06	0.000684354	k_Bacteria	p_Planctomycetes	c_Phycisphaerae	o_WD2101	f_	g_	s_
1499270	2.48001	-5.57744	1.22248	-4.56241	5.05689e-06	0.00140313	k_Bacteria	p_Chloroflexi	c_TK10	o_B07_WMSP1	f_	g_	s_
1846833	1.22672	-5.58588	1.24173	-4.49848	6.84416e-06	0.00175572	k_Bacteria	p_Actinobacteria	c_Actinobacteria	o_Actinomycetales	f_Micrococcaceae	g_Arthrobacter	s_
1838840	1.36114	-5.7761	1.09594	-5.27044	1.36096e-07	8.81127e-05	k_Bacteria	p_Actinobacteria	c_Actinobacteria	o_Actinomycetales	f_Micromonosporaceae	g_Verrucosispora	s_gifhornensis
1495151	3.85847	-5.85102	0.918989	-6.3668	1.93008e-10	2.9157e-07	k_Bacteria	p_Chloroflexi	c_Ellin6529	o_	f_	g_	s_
936016	3.36414	-5.87943	1.2796	-4.59475	4.33274e-06	0.00122725	k_Bacteria	p_Actinobacteria	c_Rubrobacteria	o_Rubrobacterales	f_Rubrobacteraceae	g_	s_
1757905	1.63982	-5.89332	1.1768	-5.00793	5.50188e-07	0.000233761	k_Bacteria	p_Actinobacteria	c_Actinobacteria	o_Actinomycetales	f_Micromonosporaceae	g_Actinoplanes	s_
1146927	1.64244	-5.92419	1.13	-5.24266	1.58282e-07	9.35655e-05	k_Bacteria	p_Actinobacteria	c_Actinobacteria	o_Actinomycetales	f_Geodermatophilaceae	g_	s_
1867343	1.52915	-5.96595	1.15674	-5.15754	2.50211e-07	0.000141745	k_Bacteria	p_Actinobacteria	c_Actinobacteria	o_Actinomycetales	f_Cryptosporangiaceae	g_Cryptosporangium	s_
1439235	14.4526	-5.97587	0.92825	-6.43778	1.21231e-10	2.45281e-07	k_Bacteria	p_Planctomycetes	c_Phycisphaerae	o_WD2101	f_	g_	s_
1555290	2.17888	-6.01904	1.01987	-5.90177	3.59629e-09	4.44501e-06	k_Bacteria	p_Planctomycetes	c_Phycisphaerae	o_WD2101	f_	g_	s_
1870356	1.93646	-6.20215	1.1731	-5.28695	1.2437e-07	8.45467e-05	k_Bacteria	p_Actinobacteria	c_Actinobacteria	o_Actinomycetales	f_Intrasporangiaceae	g_Knoellia	s_subterranea
1756728	2.54434	-6.5063	1.11607	-5.82966	5.5542e-09	6.04005e-06	k_Bacteria	p_Actinobacteria	c_Actinobacteria	o_Actinomycetales	f_Geodermatophilaceae	g_Geodermatophilus	s_obscurus
1139374	2.66463	-6.57246	1.02514	-6.41126	1.44325e-10	2.45281e-07	k_Bacteria	p_Actinobacteria	c_Actinobacteria	o_Actinomycetales	f_Micromonosporaceae	g_	s_
1793525	2.43926	-6.68762	1.02379	-6.53223	6.47982e-11	2.20249e-07	k_Bacteria	p_Chloroflexi	c_Ellin6529	o_	f_	g_	s_
