# Supplementary material for: Testing the Two-Step Model of Plant Root Microbiome Acquisition Under Multiple Plant Species and Soil Sources
Source: Front Microbiol. 2020 Oct 9;11:542742. doi: 10.3389/fmicb.2020.542742 (PMC7581803; doi:10.3389/fmicb.2020.542742)
Supplement: Supplementary file 8 [file Table_7.XLSX]

## Sheet: Sheet1
Sample	No. of base pairs	No. of PE raw sequences	No. of PE Raw sequences (host filtered)	No. of PE raw sequences (host &quality filtered)	No of base pairs in contigs	No. of Contigs	Largest contig	N50	No. Predicted proteins	M5NR hits	Observed proteins
AGS1RF	2900465682	28717482	26771264	25767884	92303845	355217	100935	269	371622	134750	47111
DGO1RF	3401471940	33677940	28921570	27837208	126536436	615929	29861	228	614186	184419	61108
JAL5RF	2783953900	27563900	24185832	23374844	139495982	711399	53892	228	705001	180528	58723
SIN2RF	3008027652	29782452	28124028	27113940	178485716	1020598	24369	167	979420	239533	71636
SLP1RF	2981480610	29519610	27275050	26217280	54959905	218383	57287	252	228475	89711	34039
AGS1SI	2690857958	26642158	26592710	25593294	117366031	866109	10520	130	807542	130780	37960
DGO1SI	2746199292	27190092	27176824	26151380	94474803	697117	31548	132	663872	139625	34051
JAL5SI	2950664298	29214498	29180904	28120794	47981924	325822	6350	148	308824	67597	21409
NAY2SI	2780005608	27524808	27513182	26553210	179597888	1226026	37733	139	1160431	192781	57795
SIN2SI	2509408024	24845624	24837196	23898608	157328651	1108428	87712	137	1055369	166554	48936
SLP1SI	2991236402	29616202	29605572	28455844	127916197	944710	18579	130	901592	165273	45741
AGS1RZ	2407375804	23835404	23790992	22890120	131470263	901510	9198	138	852266	157524	47995
DGO1RZ	3363906606	33306006	33214546	32038898	43485378	218901	10292	224	451678	68358	26215
JAL5RZ	3384602718	33510918	33482018	32347080	73996602	491832	10723	151	432016	112283	34074
NAY2RZ	3343719736	33106136	33087344	31920900	102780727	428707	237080	248	432016	157249	62281
SIN2RZ	2687528998	26609198	26487372	25684980	195636430	1294055	19737	146	1120343	227689	71795
SLP1RZ	3178069232	31466032	31450594	30406334	171192020	1252375	30143	133	1188318	240520	66282
