# Supplementary material for: Testing the Two-Step Model of Plant Root Microbiome Acquisition Under Multiple Plant Species and Soil Sources
Source: Front Microbiol. 2020 Oct 9;11:542742. doi: 10.3389/fmicb.2020.542742 (PMC7581803; doi:10.3389/fmicb.2020.542742)
Supplement: Supplementary file 9 [file Table_8.XLSX]

## Sheet: Intersection soil-ruderal-tomato
MD5sum ID	Refseq protein
00001aba8aee0c90a80969ea8da059f8	2-polyprenylphenol_6-hydroxylase
0001b00ffaca0b8b754e520833e71642	ROK
0001fc786f0a18786a2ae9309546733f	protein_of_unknown_function_DUF1549
000351ef2b99f1af4d90b5d6ab26fd78	imidazole_glycerol_phosphate_synthase_subunit_HisF
0003699b7626d5374159326bcb369f91	enoyl-acyl_carrier_protein_reductase
000689c212cd964e33a07def6084c19b	DNA_topoisomerase_ATP-hydrolyzing
00069c9b8f428de5e587aeb8b5185ddd	peptidase_U32_family_protein
0006c8e8fa2112c405c33f0e13c269ac	di-tripeptide_permease
0007400194ac6d2bb00711f17388b5eb	hypothetical_protein
0009b4fa8ecafd351d486fe6eb9a6810	protein_kinase
000a890d4d78dbdf3b0c37b76a9e8fac	excinuclease_ABC_subunit_B
000ad4d6d53177df9b3774dfc0316e17	efflux_transporter_RND_family_MFP_subunit
000be5ad0dd8f810b431b9a13e8cc620	hypothetical_protein
000bec58952168ef9e56929c0283a419	binding-protein-dependent_transport_systems_inner_membrane_component
000fd28c04d01100ce14e98a5cb9b392	diguanylate_cyclase-phosphodiesterase
0013ab3722d81ddb42c261d945cd9d97	hypothetical_protein
001456573f6aeab3fd69669f5031cf74	30S_ribosomal_protein_S12
001688c282881b2b36dfa6c034f107d4	two_component_transcriptional_regulator_LuxR_family
001714d6ac21a9013db760e91e167910	hypothetical_protein
00189776597b0737b9c465a7454df38f	two-component_system_regulatory_protein
001ac7e67605357822cec15f2c79a464	amidohydrolase_2
001be0983c4125750351a9f3c277c2d5	ATP-dependent_protease_ATP-binding_subunit_clpC1
001cee7074ad0beed367f03865eeec98	NADH_dehydrogenase_subunit_M
001ffe1070ab750838ccec9820c5db4f	sensory_box_histidine_kinase
0020d7e91bfce0276f0e7969db522922	methylmalonyl-CoA_mutase_large_subunit
0022151a61b7a57ddcb764529dd55986	DNA_topoisomerase_III
0022ce84f1d14cf30d234914a74db1a8	benzoate-CoA_ligase
00258010072142d42305358a00a6191a	3-hydroxyacyl-acyl-carrier-protein_dehydratase
00274558edcc42b1bd35db52fabffd19	transposase_IS116-IS110-IS902_family_protein
00276a22488386d869fed2b07f536bb3	DNA-binding_protein_HU_1
00287868d81eaa113cd5cfb2074d9e46	DNA_polymerase_III_subunit_alpha
00290454e575f1bcf05a3b37f8cef499	flavin_dependent_oxidoreductase
002ea9d26c4422922c5aff1bd3c91fc6	Diaminopimelate_decarboxylase_DAP_decarboxylase
002ebb0d5e94e50cbddc9f6b60698e98	ATP-dependent_DNA_helicase_PcrA
002ff5447af01bab8f5c9be2fcf9e742	Glutamate_synthase_ferredoxin
0032b563c55e5a960b19e913242f060c	permease
0033a3e67b24c4405d37682e34997d29	protein_of_unknown_function_DUF574
0033c6fbe37701952f6d727c2d0075db	RNA_polymerase_sigma-24_subunit_ECF_subfamily
003626d706e3c38ee5923f8c014deb11	acetyltransferase
0036874fefb9703d5864c15d802299e1	cysteine_synthase_K-Mcysteine_synthase_A
0038af7251d1b30e84396ad43d11ba35	multi-sensor_signal_transduction_multi-kinase
0038c18dc3e725800f2c4cfb3fb1c760	ethanolamine_ammonia_lyase_large_subunit
003b30530d0659808df6072fc2e06a87	peptidase_M28
003b50711e4bf9b878ade2aa8b1d308f	Electron_transfer_flavoprotein_subunit_alpha
003c8bd68808d90981e5d1a55f0e887d	enoyl-CoA_hydratase
003df5aacc7c0e3bed06b21df041dfdf	flagellar_motor_switch_protein_G
003e3bd2810f93887b3cf8f21503eb22	hypothetical_protein
003f1bb8429e91a96a282a81bdc66daa	dehydrogenase
003f40d0d0c5e3ae8db3ae48da151542	hypothetical_protein
00403ec0e5a0244661f63ec10b1ea612	F0F1_ATP_synthase_subunit_alpha
0040fe928f8f71634189d9206ef6e19e	binding-protein-dependent_transport_systems_inner_membrane_component
0041522cd060c9ef280418895a694549	putative_phosphate_transporter
0041c38f9b5462824bfbab86c88b4b8e	ABC_transporter_permease_protein
004317aa7b6ec9d660ccd611c5ce5e87	translation_initiation_factor_IF-2
0043c7ffd65170be3710dd0eaa67889b	RNA_polymerase_sigma-24_subunit_ecf_subfamily
0044448872c6a4c3debecf753e028f55	zinc-containing_alcohol_dehydrogenase
00453208bd4c959ae2015af001079a3e	NADH_dehydrogenase_subunit_B
00474c8bfa8411710b4a3facb7db38ae	succinate_dehydrogenase_flavoprotein_subunit
00479cd1635aa64f846dcfa597ed5d88	monooxygenase_FAD-binding
0048170ef09db483061f5e7a1ac78693	putative_signal_peptide
0049b79302dd90c25e7ff552651bbbb7	ABC_transporter_related
004ad9712f74d50406f9fa1ddb755a1d	ATP-dependent_DNA_helicase_Rep
004cd4ae236a93d3a67502907318eb1a	alpha-N-arabinofuranosidase_1
004f6f696c66081a21fe635d494c2dfc	formate_dehydrogenase_alpha_subunit
0051b4de6709da8ea5680176a3542c99	oxidoreductase
0051c1d3faa56cc5c085f302331f62e8	DNA-directed_RNA_polymerase_beta_subunit
005281764a3c747420fbf4872b711f92	AsnC_family_transcriptional_regulator
0052d0031e7db7a2f8dc27593e68dfd2	FAD_dependent_oxidoreductase
0055191251f27e113b4d2cea59e742b9	hypothetical_protein
00556f63c979ee18b4657920c11f1399	Phospholipid-glycerol_acyltransferase
0055800a3602097ef0af43d44d431eb7	cold-shock_DNA-binding_domain-containing_protein
00588b3ec7cdc6984f03a732462319ef	phosphoglycerate_mutase
005a5713a0e64f48904e0419ab20fec6	glucose-methanol-choline_oxidoreductase
005a6e84dfc6eccf3702f244b309dca2	nitrate_reductase_alpha_subunit
005d314488a047676647cfa62c49293d	DNA-directed_RNA_polymerase_beta_subunit
005dc5caac0589285bfff5513c185755	chaperonin_Cpn10
005e084ac7e25df4a32c7e7a9197db38	ferric_uptake_regulator_family_protein
005e7a52c1bd9a081902e5568aac613b	tagatose_16-diphosphate_aldolase
005e874d6caba1d47331fe207cc9d607	formate_dehydrogenase_alpha_subunit
005ef474d9d817f2ebfed19ed9a0ffeb	regulatory_protein_tetr
00611c45ea72fc57084ddae6e581cb33	hypothetical_protein
006135b3fa994e2bd334e944c20ec5b1	TonB-dependent_receptor
00615bea6834ac7b9df599c215857ba8	peptidase_M20
00623e00f8186b21b372b3e57fbff12b	L-serine_dehydratase
0064861753900cbd52885e9e5b803ea6	tryptophanyl-tRNA_synthetase
006678e30f3ace12ad0e51f273ec95f4	protein_kinase
00678755cfde6ba18ff28d605277f6e8	acetyl-CoA_acetyltransferase
006917fa92c2f6974bfd150160c8a746	LemA_family_protein
006abb4dd2e4f85c66a1d3020f5bd0d3	5-methyltetrahydropteroyltriglutamate--_homocysteine_methyltransferase
006c8bba14a3da83382411cc019a77e1	NAD-dependent_epimerase-dehydratase
006c96e1867f5682b8db2210e4dec0d6	chaperone_protein_DnaK
006cc63b019fe624a369a3d2a404e12f	oxidoreductase_FAD-NADP-binding_domain_protein
006d485fd39d238c9deaaa5d55decf72	ABC-2_type_transporter
006f22b5cc1f6b34cd6be6499c2fdb8f	glycogen_branching_enzyme
006f732337195d8cbe91b54fa36dc68d	transposase_IS66
006fd2df6e1ed6134968043bae68b8b9	putative_alpha-glucosidase
006ffaa978931e46700db92d5915219a	aconitate_hydratase
0071212c3e2d2ce874e3daecc40eb421	5-carboxymethyl-2-hydroxymuconate_semialdehyde_dehydrogenase
0074a06ba9e9602244c75785b64845b2	RNA_polymerase_sigma_70_subunit_RpoD
00763a09dda04a387e468ea90746a9db	AAA_ATPases
00773e4d2e2ed0a86dcd7b4234e36bd7	long-chain-fatty-acid--CoA_ligase
0077561bff45361d91feb8be388f3872	NAD-dependent_formate_dehydrogenase_alpha_subunit
007863261911ad8b3089cc3144c80ae0	acyl-CoA_dehydrogenase_domain_protein
00797438c0fabea737f1c10b09b24fbd	helicase_domain-containing_protein
007bdc5553d641369adf1b5ca33e73bc	adenylosuccinate_synthetase
007cbd63f6818e90698fabf617b6925b	alkane_1-monooxygenase
007ffe45107af6b58d9b4fa938c454b6	translation_elongation_factor_G
0082f5569dc10d8828443fb509e8cd54	ISSpo2_transposase
0083078b364f7b68a22eeb3ee6260a51	Polyphosphate_kinase
008469489b332c7af3eedba64ec52993	coenzyme_A_transferase
0085000476c73d43fc49ab3cd3ea0648	alcohol_dehydrogenase
008694d2953fce9584eacfd32e14ace8	tRNA_guanine-N7--methyltransferase
0086caccbabcb2ae041511c5ce310081	heavy_metal_translocating_P-type_ATPase
00879074892f1a307fab9f285fa43669	branched-chain_amino_acid_aminotransferase
0087be86d5f117f9f602c519090d3218	adenosylmethionine--8-amino-7-oxononanoate_aminotransferase
008abf65e0f86ba59fe965f2295e5488	aspartyl-tRNA_synthetase
008ca89d9fd4b09c79eac0fcf6146ee5	glutamate-1-semialdehyde_21-aminomutase
008d0e5c567cbc9144a09a837ecffac6	heavy_metal_translocating_P-type_ATPase
008f974d765d016efc00e0d9405751e6	integral_membrane_protein
0092d58c89458942d6f345b3244b46b2	cysteine_synthase_A
00932c45e5e60f0bb2d0343aa48d60f5	group_1_glycosyl_transferase
00964b00b708236d0e8cbe4b0ba3ba1d	short-chain_dehydrogenase-reductase_SDR
0096a8e77680ff0fbd0d0a729df53120	dolichyl-phosphate_beta-D-mannosyltransferase
0096ae8335eb4c3c2170421e6daa3a71	major_facilitator_superfamily_protein
00979c217b517929418f1358754fa4f9	peptidase_M24
00987c79792577bd3f7c5a78956544da	hypothetical_protein
009ad8b65ca420d4a957549f7a29ae69	hypothetical_protein
009c4a4103e70928f48a33f34eb2d425	multi-sensor_hybrid_histidine_kinase
009d1fe3dde28c26499e2ffb8aad8735	GAF_domain-containing_protein
009e095ac82a25498904226c26447286	pyruvateferredoxin_flavodoxin_oxidoreductase
009e0b2668df8bc4ac6d05e7f0ee02d5	urocanate_hydratase
009fcfd59fb93463cc5699e5d3c3dd38	RNA-metabolising_metallo-beta-lactamase
00a0c9d46bfeac76c4203acd81439364	hypothetical_protein
00a0f319f62e7aa6562c0329c8fae19c	hypothetical_protein
00a1abaebfe22c525f6cf25e09f06b24	transcriptional_regulator_paax_family
00a446a59c4a81e0a2a208f30fbf1cdd	transketolase
00a46cc0c7b59d60f22e52553b90e9a4	DNA-binding_protein
00a49bd491d81d8722e5860815529306	C4-dicarboxylate_transporter_DctA
00a53a9337ec9df9fcfda367b63539c5	hydantoinase-oxoprolinase_family_protein
00a755379ea76671c693cc98119fa9aa	DNA_polymerase_iii_delta_subunit
00a80f081f7585782419dfb88d0f5e01	Fis_family_transcriptional_regulator
00a87841ed3f55f469dd90846c113483	putative_acyl-CoA_synthetase
00a9a0d1984483908642e02517dc01f2	cytochrome_P450
00a9a453cec67345f0e022d3737f0c39	hypothetical_protein
00aa382e4db677d3467f102e2361198a	50S_ribosomal_protein_L23
00aa8f3e15c7abee6dca98b7f6ad5c21	4-hydroxy-2-ketovalerate_aldolase
00ab093428f690d1f1590780e9e19719	kynureninase
00ad7aae119b1b913b05bfa9ea6e67df	GTP-dependent_nucleic_acid-binding_protein_EngD
00ad7bce7c888e839b4f29afc3a68459	phosphoketolase
00add60eb04e8e34da01a3d2a4c16ade	glutamate--cysteine_ligase
00ae96b009417dbc59a0367f86f29982	histidine_kinase
00af18f7b79d1d4d7436acc18a498d6f	circadian_clock_protein_KaiC
00af498ead169193577332acf03e9abe	hypothetical_protein
00afa4e186ba3d35597a636227f96d43	formyl-CoA_transferase
00b194783c54aa200bd5cff97507e053	alpha_amylase_catalytic_region
00b2541d18e83659c43e56b7cf150c1d	acetate-CoA_ligase
00b36fa68c70e1e51b74baa787032abe	thymidylate_synthase_complementing_protein_ThyX
00b374ef23b1b02e28540ade82394feb	preprotein_translocase_subunit_SecA
00b4611b29c36bc52ec44ca0c4487e16	Methyltransferase_type_11
00b4f6d71a3362beb8001b09d52a85bd	hypothetical_protein
00b7a248dd9f9b9ebc1801cfdd666e8b	globin
00b9b7de707c728c886bdf68fa29df63	NADH_dehydrogenase_quinone
00ba8336ce885614dc13707fc486b27c	dihydroxy-acid_dehydratase
00baebb06a90feb1102da23478fb5664	ABC_transporter_related
00bb5abc5ab6cc37d0133447e4762883	putative_ABC_transporter_permease
00bb8d32e57c826f27d766e277039066	multi-sensor_signal_transduction_histidine_kinase
00c092b177e9524754f556fc298e9075	binding-protein-dependent_transport_systems_inner_membrane_component
00c170e3d13296d0e2cd7cbd5b50ce33	DNA_repair_protein_RadA
00c1b1402c2e3414f437aba24da8cdfd	ammonium_transporter
00c4ea6fcd31958f0c614597f99c8352	ABC_transporter_phosphate_binding_protein
00c6fb4733ba14e640f852814b8e0779	acetyl-coA_acetyltransferase
00c71ba7d6353de8675b4d073b100892	DNA_polymerase_III_alpha_subunit
00c806b5bec978ed963af23ea886d2fd	glycogen_branching_enzyme
00c8c4651e50f91c0f479c370e462c17	Phosphoglycerate_mutase
00ca0e95f6af777968fd6c7b6309e00f	hypothetical_protein
00cb4d7e53da99b8e1e36d17e1b37b96	multi-sensor_hybrid_histidine_kinase
00cfd32a397633af5422ffe043470dd9	glycosyltransferase
00d130d6e2106f1cf48750797d348e0c	ribosomal_protein_S7
00d190fce74ca516de33786637677854	TetR_family_transcriptional_regulator
00d1e7e62709f02f009935bd6c37221b	hypothetical_protein
00d2a16eb55280fbeb84a64bf8d820ba	SpoVR_family_protein
00d567b0fe9503393f8ca5c5609a2c01	F0F1_ATP_synthase_subunit_alpha
00d6344b50ec0b5ba8ef11db8c989191	Alpha-glucuronidase
00d780e9f98ae6ac699d2314c4127331	polyphosphate_kinase
00d8e7b48e74817275d21bc69ebe5bfa	homoserine_O-acetyltransferase
00d9ae14f8c955c2e809a04698dd92d5	glucose-6-phosphate_1-dehydrogenase
00daf4f3e47b18075bdb24ee197e1273	hypothetical_protein
00dd85c0911cef5e94beb5d0e1f15330	gamma-glutamyl_phosphate_reductase
00df4a56e1049db3b4dc1b703bde9bbe	B12-dependent_methionine_synthase
00dfa3b920d0aadeb26f521dafffa5e2	putative_circadian_clock_protein_KaiC
00e2ae2002aeb11b2948ea53d54d718c	extracellular_solute-binding_protein_family_5
00e49afdf67b310fc5cada77b99252d1	double-strand_break_repair_helicase_AddA
00e5881458768fd88504ed85a6b8ebd6	helicase-related_protein
00e5ebf36a41fcede8f76c1f1750a807	acetyl-CoA_carboxylase_biotin_carboxylase_subunit
00e85ea9e4507abe6d0eb52f4bcde147	enoyl-CoA_hydratase-isomerase
00ea351f68b36708cc35f995cc8052e7	GntR_family_transcriptional_regulator
00ea7c0eeae356b516002dfd483f2ff0	hypothetical_protein
00eb36cd6a9702a64d02e22708a553de	UDP-N-acetylmuramoylalanine-d-glutamate_ligase
00ecbd520c178b1965fab3ba7a4edf39	ABC_transporter_ATP-binding_protein
00edaa44ccca8aaba9a9208b18c15d16	cytochrome_oxidase_subunit_I
00ee08e9779761615fe2c9e3b1caf2d4	ribonucleotide-diphosphate_reductase_subunit_alpha
00ee94632e2c6e883ef3a47f2a05afe8	glutamyl-tRNAGln_amidotransferase_subunit_D
00ef11cce8184db447122bd2ce2a180f	NADH_dehydrogenase_i_d_subunit
00ef8f64acb924b35bd926efb13a9b2f	major_facilitator_superfamily_MFS_1
00f01a8538350ef90eba30d0427f509b	ATP-dependent_DNA_helicase_DinG
00f0dc0abe0f6b7360a247e833996859	sporulation_and_cell_division_protein_SsgA
00f0e011c617e79f8de111a0372662f0	polyR-hydroxyalkanoic_acid_synthase_class_III_PhaC_subunit
00f1b29ebc6d3a88a29b2dc9532b9a49	Inorganic_H_pyrophosphatase
00f1da6276210b0912825998b04f8411	K_potassium_transporter
00f32540b75e6e0a1a0bf7a5e7302a8c	protein_P-II_uridylyltransferase
00f419dadf3d4514b22083ef5899548a	dinucleoside_polyphosphate_hydrolase
00f4d6661a1635ab84fa79c88c040c12	periplasmic_sensor_hybrid_histidine_kinase
00f5f48b0e4cbd4203d4165a18cc5f2a	MMPL_domain-containing_protein
00f8947c5738621d4dd0eeec77ca130f	30S_ribosomal_protein_S2
00f9011e4e993101f8d46d167379944b	hydantoin_utilization_protein_A
00fc7784bbec580d9f5594eed68dadb9	LysR_family_transcriptional_regulator
00fc89684322d083c7743f1e43a6e8ff	Type_I_phosphodiesterase_-_nucleotide_pyrophosphatase_superfamily
00fd287950065aad79b84d87823ba02e	spermine_synthase
00fe46eb24d7b4afad88867dde878c99	hypothetical_protein
00fee9309568b52484238501e2ea9cca	inner-membrane_translocator
0101ac674125225110b92af0f737b607	two_component_transcriptional_regulator_winged_helix_family
0101e9f36d98309c4ebbb2d53273719a	ABC_transporter-like_protein
01020b6bc89e49af074a47b2cd28d244	Helix-turn-helix_type_11_domain_protein
0102d94fdd75248cfcef5fc090ab5627	AcrB-AcrD-AcrF_family_protein
010670ec481f5a9e01a0f083e7232f06	cell_division_protein_FtsZ
0109af08f919eee3c51c41b6d0e0ad0b	extracellular_solute-binding_protein
0109f42a65b09f24edd402d6e782b32e	aspartate_aminotransferase
010a4c4361ae4594250293c19db7c464	AMP-dependent_synthetase_and_ligase
010a959a624e3325be16a8d4eb6e7f05	sugar_transport_system_permease_protein
010d8a9f19e3865297efeaba85e3810e	DNA-directed_RNA_polymerase_subunit_beta
010d8c9934f440a6f5b5e128d32b4ecd	DNA-directed_RNA_polymerase_subunit_beta
010fd6d83ced7ec30dd826656d783b07	putative_phenazine_biosynthesis_protein
011021e31644293a974b90d71e34ba23	sensory_box-GGDEF_family_protein
0110bec0d5ffe97d4a994697fa716a86	dTDP-glucose_46-dehydratase
01118f97f185a5a5aa3d1ab7ca37449b	aromatic_amino_acid_beta-eliminating_lyase-threonine_aldolase
0111c55eac64ea20da8e986eeae54be2	glutathione-dependent_formaldehyde-activating_GFA
01127fd1d83c7720053e6f181d6213c6	NAD-glutamate_dehydrogenase
0113669a414479773159c5b42452f6a7	aminotransferase_class_V
0113842c590f3adfdb847469d954cada	homoserine_dehydrogenase
0114063e603fcc69a2767d0e9663e34b	ECF_family_RNA_polymerase_sigma_factor
01170d4eb68f6f33f8e0fd3b74b3b31a	nicotinate-nucleotide--dimethylbenzimidazole_phosphoribosyltransferase
011940426fe04d045b2e6f66ed4a26f0	dimethylallyladenosine_tRNA_methylthiotransferase
01196b1b741040ce5986dd008400ab83	hypothetical_protein
01196b2a2cc30130038d5f55012e1720	putative_large_multi-functional_protein
011b1ea1fa3a2061ce75b2520f6d90f6	dihydrolipoyllysine-residue_succinyltransferase
011bbead2e5a4cf0cadbb5a72e6b7697	regulatory_protein_MarR
011c3ea35ccd3684aaf28500b21fc671	ATPase_associated_with_various_cellular_activities_AAA_3
012005c4e2ebaf918c16931a9b0e3e83	glyceraldehyde-3-phosphate_dehydrogenase
0120edb002288ed888b7f9a0a6935695	HAD_family_hydrolase
01212e344d10401b4057757bd0cee7eb	tRNA-i6A37_thiotransferase_enzyme_MiaB
0124228000df43936f11c9305c20b15d	DinB_family_protein
012489f380b17ac351ccf6dded5b8567	hypothetical_protein
012648ff4af7cbb45901c72f16107fe3	acetolactate_synthase_1_catalytic_subunit
012668356714b3e035dc9c3d8e09cb12	aldehyde_oxidase_and_xanthine_dehydrogenase_molybdopterin_binding
0126a201311c0bcecf4ca63aa83078bb	agmatinase
0126e817be9cef273d8cf59b77b16459	protein_of_unknown_function_DUF1501
01276605f4c62e909db2f4dc7e3b30f8	S-adenosyl-L-homocysteine_hydrolase
012793e6f9818d4240d16bb993efbeb1	cobaltochelatase_subunit_CobN
0127aa44fef5a61fdeab5055e5d7f82c	acetolactate_synthase_large_subunit_protein_thiamine_pyrophosphate-dependent_enzyme
0129ba7a953113de9cae91a60a0c23b2	glycolate_oxidase_subunit_GlcD
012e679f9b05ae4d1cdf019682b062d8	hypothetical_protein
012f715edd22d74a5d56f645276fdea7	putative_esterase
013116e0db1ac742a11f1b5d252585e1	putative_exopolysaccharide_regulatory_protein_exoR
01314b3bfa1a17aecd762a7edb408bee	glucosamine-fructose-6-phosphate_aminotransferase_isomerizing
01329202b9b2fa560bca9eacc71b8547	glutamate_synthase_NADPH_large_chain
0132f55c23fe1c457b0f0a832654320c	tRNA_uridine_5-carboxymethylaminomethyl_modification_enzyme_GidA
01333a6ab58d573ef02d3078d80d9c73	lytic_transglycosylase_catalytic
0134af7527a85d2c4945161780f1f065	peptide_synthetase_protein
013530917ae53590bd09472ab6a1b29c	permease_YjgP-YjgQ_family_protein
0135fb0c4d6054c5b7297bed083f49dc	DNA_ligase_I_ATP-dependent_Dnl1
01365909941022f63db26e18e72e116d	aspartate-semialdehyde_dehydrogenase
0138d0ee037d547cbcf6a26abe001406	base_excision_DNA_repair_protein_hhh-gpd_family
01395793191b948e7209813683cfc78d	carnitinyl-CoA_dehydratase
013ab13f50c33215a674cc3d380646c0	tetratricopeptide_domain-containing_protein
013cd2c3777833eb07ac88ac212bada5	Na-Ca_exchanger-integrin-beta4
013d93f4af0216478492306d36743a01	trap_dicarboxylate_transporter-_dctp_subunit
01400f48db6a188297068219cd2cb74d	hypothetical_protein
0141a9ce5df7b978ae735d168d5eaaee	seryl-tRNA_synthetase
014299bf644f88e116105d445b3bca9e	tyrosyl-tRNA_synthetase
01434020fabb0496f7eb6606b95e24d6	arginine_deiminase
01447379e1c8eee1f690fb33ac391599	30S_ribosomal_protein_S5P
0146cca64188d97c4eb8b721ff5d9db2	aconitate_hydratase
01470d42868b8d36dcf5e5b50fc392dd	ATP_synthase_F1_subcomplex_subunit_alpha
0148cbf2708f4547e0d13ee7fc60f473	dehydrogenase
0148fef73d988708844660dd149429c6	DNA_topoisomerase_I
014902a60f22a310ccf111d26a2d6f72	putative_modulator_of_DNA_gyrase
0149649ba5f6e638d8ba83f6bbfaefea	fumarylacetoacetate_FAA_hydrolase
0149882a346fe012b2deb959e99b8ded	PadR_family_transcriptional_regulator
014b741a9312e34d350e747f968ead7a	DNA_polymerase_III_subunit_beta
014be5135846abf4ce458e00ccd146bd	translation_initiation_factor_IF-2
014c0878c9b540b35e861a15c357dfbd	aspartate_aminotransferase
014c2dbea9b3b5b806e373bd62f99960	Peptidyl-dipeptidase_A
014cc64bb6cc0c74e7f4c442f31d3ccf	30S_ribosomal_protein_S1
014d4c51b3a6f89e22d7cec26b127fe2	malate_dehydrogenase
015072e6f7cd197f66f498a238243884	NADH_dehydrogenase_quinone
0150dc070486f006ac1324c822e4377e	oxidoreductase_fad-nadp-binding_domain_protein
0150fdedc7d5b286b1323d3d5f97ba24	fumarylacetoacetate_hydrolase_family_protein
015526475ccf06f328bc1c352c5a43a7	NADH_dehydrogenase_gamma_subunit
0155862f3a5f562a0a284e26b2c47780	signal-transduction_protein
01562720b05476c16830292d33bcf6aa	putative_oxidoreductase
0156a107d5a222d3f11b32596df36733	hypothetical_protein
015950dc0c58739827900cfc76fa4252	cobalt_chelatase_pCobS_small_subunit
0159625935af6cd67db10a7f22a45239	long-chain-fatty-acid--CoA_ligase
015adc16478fb4a6dcfc551250d4c7b9	formate_dehydrogenase_alpha_subunit_fe4S4_domain
015b64baba45eb4d631ea7d4a81f5598	probable_sugar_ABC_transporter_permease_protein
015cfc1e9e59bb9c8ab9d701a6398860	DNA-apurinic_or_apyrimidinic_site_lyase
015dafdab22fd0a56e11fd87ad2ea77a	cell_division_protein_FtsK
01633e12876ac543cdb7f3d384a5cc60	cytochrome_bd_ubiquinol_oxidase_subunit_I
016376acac103913044dbf42d0a99c9e	serine-threonine_protein_kinase
01659bb9892dfb97757b85d48f0761e9	nitrate_reductase_large_subunit_protein
0165ef3794c54eb1d853e9c864ebf132	oligopeptidase_B
016642e030db896259de62e783ff29a3	two_component_transcriptional_regulator_LuxR_family
0166436caba8706f7c5503904b0588ee	endo-14-beta-glucanase
01670340b9633df10b8a6b08795a09d7	NADH-quinone_oxidoreductase_F_subunit
01697f280e20adfda747dbd9dd488957	fumarate_hydratase_class_II
016a708e73b3851597dba80c93871b6b	glycine_dehydrogenase
016ae388034a820ecdf4b4279a564cc3	ribonucleotide-diphosphate_reductase_alpha_subunit
016b0ffd757c02033f3f9c679a00627f	D-lactate_dehydrogenase_cytochrome
016b691042a663c1d9f82d7df2e8d094	basic_membrane_lipoprotein
016d663ae5d4c3f00ba95f6ab65c6a7b	LAO-AO_transport_system_ATPase
016e448819616d812678cd4bce9a565a	UvrD-REP_helicase
016e90cf06699e0b0c9f048b4e1aaf5b	exosome_complex_exonuclease_1
016f47a6a1bd78335f4d9666fe0f8911	hypothetical_protein
01706469f9cf7417f3ed1edd36efe063	DNA_uptake_lipoprotein
0171054bd8081a63531f4451e04a12ea	2-ketoglutarate_NADP_oxidoreductase_alpha_subunit
01741ee80808f00f17c384dffe113a60	putative_nucleotide_sugar_epimerase-dehydratase
0174e9e3e8d75968613d6900b19295d1	serine_O-acetyltransferase
0175f7127fc151c25816080d88c6e878	D-mannonate_dehydratase
01780ea0683c19549c679aef0e8e79fe	glutamate_synthase_ferredoxin
0178da42e968e2170bd25bce0fef9633	DNA_translocase_FtsK
01797d4592eaf201031aa7617e2ea0d9	glutamate_dehydrogenase_NAD
017ad6f4a85b6380ddbc922d42a116c9	hypothetical_protein
017d511ccd31177ef8f9c723f39edf00	haloacid_dehalogenase_I
017e20a9cfeb643abd6aeb92569cd8fe	succinate_dehydrogenase_subunit_A
017edac48bb8e1ef8649e12a66c2c67e	integral_membrane_phosphoesterase
017ef90caca3d4a944ab323e29fdb02a	beta-galactosidase
01807c2eade2806a34513cc66cbc5cfd	sulfate_transport_ATP-binding_protein_CysA
018155a9cfef6cdf9556007ece0be0d9	DNA_translocase_FtsK
01815dde7814db8e93da4abcbaea6a44	hi0933_family_protein
0181f46484841bf753cecf16e477db60	transcription_termination_factor_Rho
0182be358d69efcf40501ae8c62184ae	D-beta-hydroxybutyrate_dehydrogenase
0184fe1b4fde6b19ecf3021e7b3d3a26	ribosomal_subunit_interface_protein
0186c3112bb36851dc807cb93d7e5c5a	ABC_transporter_ATP-binding_protein
018812fa21f4585cebad8028f54a7cb6	hypothetical_protein
018858837fff1df9b6ffeda879a21204	thymidylate_synthase
01894ae174676772648827ca881e3b87	cardiolipin_synthetase
01899e55445f13eebf482692180231e2	hypothetical_protein
018b3fbbe921ad6dec0a45fc9d765154	hypothetical_protein
018b78c2a5810f072ec414ba050905e0	chaperonin_GroEL
018bcfbcc15312cebd8544acd47fbfac	chromosome_segregation_protein_SMC
018ca62ba7e8b5e4963afd33f2151702	serine-threonine_protein_kinase
018cc3fd19f762cd52b52999c0692327	3-isopropylmalate_dehydrogenase
018d6eeed985eca58229b82a24825765	mutator_family_transposase
018daccf179aac9c3fdf8ef0f938f810	outer_membrane_efflux_protein
018e93d5bcef5c01d2d64cd47d806d7d	dioxygenase
019093a82c61ecaa387be7aeb9f993ab	leucine--tRNA_ligase
0190b42c39e2f45355683c74ab905f95	hypothetical_protein
019143d5a0d26d9eb612fbe8d8051187	DNA_polymerase_III_epsilon_subunit
0191f5279f14d2c5b6fd6c3bd7acdcd5	putative_GntR_family_transcriptional_regulator
019371dc69f8838756b50104a5bacf80	Integrase_catalytic_region
0197975dd15f5ecbfdf18f496b53f2f6	dehydrogenase_catalytic_domain-containing_protein
01981384447513c4026c7cbec72675c8	ribonucleoside-diphosphate_reductase_adenosylcobalamin-dependent
01986a46b0379317dfe473ce6e25ba9a	sarcosine_oxidase_beta_subunit
0198eed9dcca23ca3b2a165a79210b96	beta-lactamase
019a76a6c737f5589bd91e0b54638147	citrate_synthase_I
019c4964d0f377029723d8ae2ade5eb7	hypothetical_protein
019e701ea1fbf29817950f355991f49c	major_facilitator_superfamily_protein
019faf7d460b9d34a643bd877068906d	FAD_linked_oxidase_domain_protein
01a02e349fbde6776a01c8c910b8e5af	ABC_transporter_related
01a0905a203fc04b0e3d6e65c88251f1	chromate_transporter_chromate_ion_transporter_CHR_family
01a524c65faf14d98986123cfc39b12c	transposase_IS4_family_protein
01a7171dccfe0cf7e9043a2dc85a33e3	arylsulfatase
01a73128c833e0b5eb3f0baef7dd949a	protein_kinase
01a7b822b17e05bd459e241ab6243256	hypothetical_protein
01a95aae9dc1b502529c1e2550b2416c	putative_translation_factor
01a973de8d92f3a64aa960987fef6b4c	valine--tRNA_ligase
01aa58593b4fb3550f6ee3d0b9e2eff8	protein-tyrosine_phosphatase_low_molecular_weight
01ab22693c9fbd3f11be9bb4d211402c	threonine_synthase
01abbbf47198a7ce37490f32834b7c39	putative_sodium-proton_antiporter
01adf9d7f118b895809b08846462d3c1	CTP_synthase
01aec63b9d4a05abeea18a52d8021910	aldehyde_dehydrogenase
01aedba1751c85a037e282a11ddbe5b4	protein_phosphatase_PrpC
01b1c7a91d177904b622e673f302c0f2	molybdopterin_oxidoreductase
01b45e4095bd2ff564b5b17d9a797faf	plant-inducible_protein
01b47d31c7a2fb174ca82a06d3a529b9	TonB-dependent_receptor_plug
01b4d6d956594876ddc4d88cafdd1233	Polysulphide_reductase_NrfD
01b51b90f7f6e952b24d087f951b57ee	transcription_factor_jumonji_jmjc_domain-containing_protein
01b57ac57172ed4315f7ea2debbf29a2	carbamoyl-phosphate_synthase_large_chain_carbamoyl-phosphate_synthetase_ammonia_chain
01b6236a9f5ca9158b90e8b1d40b9405	aldehyde_dehydrogenase
01b7074a30a22f8fa4320d7ffb03f7d2	butyryl-CoAacetate_CoA_transferase
01b78087369ab8eb34c033e1a502af58	Citrate_pro-3S-lyase
01bab433446cd0546a41c62735815dc4	carbamoyl-phosphate_synthase_small_subunit
01bc47003763fb135110786f003ee8ba	membrane-like_protein
01bdd86e25464a17b22a1ef75290869b	two_component_sigma54_specific_Fis_family_transcriptional_regulator
01be5025ed547baf93c998424a6dc866	extracellular_solute-binding_protein
01c14b606a4bea58ed7eaa93f578291e	dihydrolipoamide_S-acetyltransferase
01c34d92db6f44d171b6e528ab4dfefa	ribonuclease_Rne-Rng_family
01c435a86728d3d9980670a12b5eae25	acriflavin_resistance_protein
01c538bd1ebf22347c0ec5097731c61f	sugar_transferase_PEP-CTERM_system_associated
01c5e876e37a42ceb5a6f4ca738da1d3	hypothetical_protein
01c618d18973f460f5a6cc59950a254d	hypothetical_protein
01c7c77214a42a6e00d6835d2cc7d45b	aspartyl-tRNA_synthetase
01c9d0a38dc1236750edc621420f0422	manganese_containing_catalase
01c9fe6e7a65e2140645ccd9ca17de32	ABC_transporter-like_protein
01cbb183c217fbeae0ac0f1fb188d91b	molybdenum_cofactor_biosynthesis_protein_B
01cc9ed56aa446697116e565b4cb78ac	acyl-CoA_dehydrogenase
01d021f36b368e555c2692e3f719e2dc	heavy_metal_translocating_P-type_ATPase
01d0ee9eb00f6fce2c6b1b978dd6f66f	Amidohydrolase
01d1963a3f4060c603a8ddceb037f048	tetracycline_resistance_protein
01d1e7fd9559da8cb6753ade614c2193	pyridoxal-phosphate-dependent_aminotransferase_enzyme
01d2309cbb43ff97ad6c515de36c6303	modular_polyketide_synthase
01d2c764b5b19fac8e5c583fb809de5d	TonB-dependent_receptor_plug
01d349238ffd74cf437ff63b236c3068	Pre-mRNA_processing_ribonucleoprotein
01d4339e4e71031fc8b8a98ebbe7ea91	putative_gamma-glutamyltranspeptidase
01d61081a72abeb598b64096dd2cafbe	glycoside_hydrolase_family_3_protein
01d794a9d372ecd75c5cdbe7c8169c8b	extracellular_ligand-binding_receptor
01d7cc5908c0362897997d4e01442500	putative_transposase
01db36d50bb5aba164bf2014766dd019	aromatic-ring_hydroxylase
01ddcb3728442c2fd7177b71028a90de	Beta-ketoacyl_synthase
01de479f2edd801a2d2180e429667bbd	protease_do
01de7570d567dd9abc14cecdf011fd8d	DNA_repair_protein_RecN
01e11c7c2480d98becb600845b67b700	putative_ATP-dependent_Clp_protease
01e2189e96c341a86c8f55450e3edc73	peptidoglycan_glycosyltransferase
01e26ece86154de21c19833af883a9eb	deoxycytidine_triphosphate_deaminase
01e2d8977a932031b97d2fa4c27581f9	4-coumarate-CoA_ligase
01e40f6f847f3781d1fb91d1719dbc0a	HAD-superfamily_hydrolase
01e42a67759234638c6b4e862fd9fce8	helicase_domain-containing_protein
01e4e5238e56b7be1fece49e6097c4d9	MaoC_domain_protein_dehydratase
01e53efce36ef03a29f5ad8f2695265f	NmrA_family_protein
01e74723e128cf47ac225f0cc3342ebe	peptidase_S41
01e757970ef4d6ae0628cad868334ee3	two-component_system_response_regulator
01e75eb8c28c6bbdfacb6b94c4a58293	1-aminocyclopropane-1-carboxylate_deaminase
01e76f0b8d14baf9339509679a30d022	hypothetical_protein
01e91dad0ffd5427c04ea267572df245	transcriptional_regulator_lacI_family_protein
01ee105809f4f693b3889b9c57303229	RNA_polymerase_sigma_factor_RpoD
01eeb3efa8747f3e0c94c1d163a7fdef	hypothetical_protein
01f0af35ca7bb545593f0293afd8a09f	DNA-dependent_helicase_II
01f2893a2a2b9d78b233ab3fd6b7358f	gamma-butyrobetaine_dioxygenase
01f2b01f16536e0ad53c7b47c5c839c7	hydrophobe-amphiphile_efflux-1_HAE1
01f30e48e4804b8bd1294798c3b08c13	ABC_transporter_binding_protein
01f368f4cecdf70f2f00b3ced518be8f	saccharopine_dehydrogenase
01f4ae2799bed3897f6184fff1a8c65c	chaperonin_GroL
01f5e97c614d26a47b6c88539a4d22d2	ATP-dependent_RNA_helicase_DeaD
01f6b42da785cdb9cf0eb8fb700f6f4b	NADH-quinone_oxidoreductase_F_subunit
01f72dad569933faf6dcedf2f64e27be	galactose-1-phosphate_uridylyltransferase
01f7d9e4d6cc6ddc2b96e81d8594385b	AMP-dependent_synthetase_and_ligase
01f7e8ac9b77b84a4910dc58008aaaa4	iron-sulfur_cluster_binding_protein
01f91d5abed11b4c7dd195ffc2ea2330	LysR_family_transcriptional_regulator
01fc58f1c02233b2ffddde662bb14538	beta-lactamase
01fe15cfcb3549b839d8e3cb18589663	NUDIX_hydrolase
01fe2ab7d31b2067eec5b3be5875868a	citrate_synthase_I
01fef813d37ef79d7a196df54bf3a7df	fumarate_hydratase
01ff73b21e6a68e11e45d59261fe27d5	carbamoyl-phosphate_synthase_L_chain_ATP-binding_protein
01fff093c507d05b965182c8cfb606b6	30S_ribosomal_protein_S5
0200810edc3b98b15e2b867bae77c0d4	GroES-like_protein
02008cc6b132615a44144ad7708040ec	penicillin-binding_protein_1C_PBP-1C
02018c32fcf39626ce3840696ac51238	hypothetical_protein
020249eb1e15b0db795e32cffea3c5f4	S-adenosyl-L-homocysteine_hydrolase
020485c12cdbba24213c3531e1761265	DNA-directed_DNA_polymerase
0204b9b173c805f4708055fedc488c68	hypothetical_protein
0205af508c1e16e0777e714f28f13b42	nucleoside-diphosphate_kinase
0205cdcaa11a39266ee652f2f5220fcc	GntR_family_transcriptional_regulator
0205ef5149be5835215372e68135d446	NAD-dependent_epimerase-dehydratase
0206e0f436600c5310646377f1835cfc	serine_protein_kinase
02071e93df0cab3a24b283dde9244102	S-adenosylmethionine_synthetase
0207e374b247b8cdc8858407562b2678	mannitol_dehydrogenase_domain-containing_protein
0208455793a34a129d32bf9e9af5a6e2	multidrug_ABC_transporter_permease-ATPase
02095d861bce51cb35882a827dc9e2e4	phosphoribosylaminoimidazole_carboxylase_ATPase_subunit
020a9ff8c78e9acb1981b85636fd6d1f	formate_dehydrogenase_alpha_subunit
020bca481f2506315af63b562dee3e0d	Adh
020e6d198912dbc83fb7aaf044d390a8	binding-protein-dependent_transport_systems_inner_membrane_component
020f3f913f6b42f7b1abdd86e8dc6ffe	hypothetical_protein
020f87c3e14c7568c49bd0e0fffbc292	acyl-CoA_dehydrogenase_domain-containing_protein
021108065389d849e5df2a99b0b5454b	cysteinyl-tRNA_synthetase
021120ba1837c14a128ed485cbc22b4f	tonb-dependent_receptor
0212b558dba9d44fa7b8898e9e32b20c	hypothetical_protein
02130426831f254c4f98b6b6dd808188	hypothetical_protein
0213a8ef5953bc454c0a65db7fe5ea4d	hypothetical_protein
02164c40e63f94d75387c76c06b65ba5	membrane-flanked_domain-containing_protein
02179d7d253e0e7e418b1fa4e1cbe3aa	cytochrome_c-type_biogenesis_protein_CcmF
0218040eaae7c99c06cf21edfef38ec4	LysR_family_transcriptional_regulator
02182c1730cbe51da275067dd0c3103e	putative_nitrate_transporter_component_nrtA
0218bad2cf0a95e121eb44496b4ae695	SpoVR-family_protein
021991796f7f2235e2c14fd96dd882b7	PilT_protein_domain_protein
021b0d601eb5c9a0e193defe23742a07	B12-dependent_methionine_synthase
021b13d560c577fed5dd1a4de30deb1e	histidine_kinase
021b486cdf14feedaf20e9e4d0942f63	NUDIX_hydrolase
021d61f19a79a1474da1ad48765779e8	excinuclease_ABC_A_subunit
021d69c55429d97df7b8037f90169ce3	glycerophosphoryl_diester_phosphodiesterase
021fc28db13a3cc85fb7860ff13a665f	5-methyltetrahydrofolate--homocysteine_methyltransferase
02229fbeedaa79b40075fd5ead6ce7e3	peptidase_M16_family_protein
02236941ee9c7c33982f4d5a2d8fa175	propionyl-CoA_synthetase
022407ec107e87b33ee9521d187aea3a	hypothetical_protein
02255df696100ba814b6e16ab98f38b2	hypothetical_protein
022689cfe41d55a3e4511968eb0ef83b	glycosyl_transferase_family_2
02285947d64f34a752387a5b4b42ccfa	phosphate_transporter
0229011cb33603b3732e08fe4d22183c	short-chain_dehydrogenase-reductase_SDR
022bbfe34ba50893d2d1b0ba4a2394a1	butyryl-CoA_dehydrogenase
022c0630b601514cbc5e079fb0438787	DNA-directed_RNA_polymerase_beta_chain
022cd581248438de29626d65252ef60c	Formyl-CoA_transferase
022d6f433c046bef260c610bd79cbcf8	glycyl-tRNA_synthetase_subunit_alpha
022e8cd79f1b2034b13559f613146b25	redoxin_domain-containing_protein
022f5f32ca5f78d522b77fdcf500f042	potassium_uptake_protein
022fea2724a7b326dfeb91fd50688827	2-oxo-acid_dehydrogenase_E1_subunit_homodimeric_type
02311c101598d0ad0c3b6ffb8a9c7847	dTDP-glucose_46-dehydratase
02323f120f44cf17a9bd4528ef86087a	inosine-5-monophosphate_dehydrogenase
0236777832b0d102d45cb5e709d7806a	Ppx-GppA_phosphatase
0236ae70b34501095510575c21eb85c3	hypothetical_protein
02371c08afabb2a95a3bab7160c6403f	polynucleotide_phosphorylase-polyadenylase
02375bde471e7da875f81e3493a2c2df	transcription-repair_coupling_factor
0237cebd29207d17a93c49b8d0665cfc	major_facilitator_transporter
02394aa534eac409344286db4c536e12	isovaleryl-CoA_dehydrogenase
023972ec63bc75b9c8526a8dda628f26	recombination_protein_RecR
02399a766eeb1f5a0769dceaacf7b43c	60_kda_chaperonin_groel_protein
023a37478b2d04c72ec68c64fe3a8394	acyl-CoA_dehydrogenase_domain-containing_protein
023a3d7bdf7aafda6648a90b3d6d6526	Phosphomannomutase
023d3bab27888ce401f01ef0e39bab07	PAS-PAC_sensor_hybrid_histidine_kinase
023d46e00a84ce9b4b7f1bb9adbb8bf8	citrate_synthase_protein
023dabf2c554acdec8c59d57372a6e56	DNA_polymerase_III_catalytic_subunit_DnaE_type
023e758d42675a54332264a725073def	rhomboid_family_protein
023f18a3b70c4dc0b5d3dd920e302e3f	dehydrogenase_catalytic_domain-containing_protein
0240cd6c7158ca9237933faafeacef91	heavy_metal_efflux_pump_CzcA
0240e1db946eb10aea273f9a0f81aa5f	isovaleryl-CoA_dehydrogenase
0240ff27ce58dca0cd6e7256a5c30edc	haloacid_dehalogenase_type_II
0243334eedccea37796495c5faabb0ff	excinuclease_ABC_B_subunit
0245e320637ec9c89bab2323480fdca4	Carbamoyltransferase
0247619f56331a6a08220ddc3cf18f09	hypothetical_protein
02483d6a04718fd231af659578107c89	fad-linked_oxidoreductase
024aefa9fd0c29625cf9c883d5d77725	L-carnitine_dehydratase-bile_acid-inducible_protein_F
024b7b69ba9217228658b25339f21de5	Rhodanese_domain_protein
024be5f013ee10de18c8cf6ebf5dc1b9	protein_phosphatase_2C_domain-containing_protein
024c405909e5977e16797cbfed2d8668	putative_racemase_protein
024ced09fbb6e90ed7a610db77801325	acetylornithine_transaminase_protein
024d567d8548b899f9cb7584ef5fab62	hypothetical_protein
024f359fc27b2f6b27bab5bbd80203c3	hypothetical_protein
024fcd08a861ed0d8e89e2fb02d81791	amino_acid_adenylation_domain_protein
0251275176015655ed8e20393df14062	hypothetical_protein
025268674d9d16a69ee27a65eeca4aa0	calcium-transporting_ATPase
0256649c9a78ca28128230c0e35e52db	subtilisin_like_protease
025765c756841be0f123ae5a8d66a8c5	asparagine_synthetase
0257f8de3ecd74d2c9825f72ca127a52	ABC_transporter_permease_protein
02583a32ad36888b2ffc592b3691ee99	ABC_transporter_periplasmic_binding_protein_precursor
02586f3f6cd19c432ac8d02dc5b6f139	cytochrome_P450
025de54f2b56041e860698202df8df9a	protein_of_unknown_function_DUF989
025eb94c23e56ad81b62f628957e580a	K_potassium_transporter
026274bcbfcc7c6acb1d4bedc32fd016	integral_membrane_sensor_hybrid_histidine_kinase
0262f28cd475c9f955b455ad33033501	hypothetical_protein
02634d93e80ce6ff81f583a3b099f3c6	transcription_termination_factor_rho
02639a189233b50e44c14f318fe1da26	flagellar_M-ring_protein_FliF
02652065d4d48bc4a5a44d59a4b82173	homospermidine_synthase
0268005571e93816ec40af104c8d6592	oxidoreductase_domain_protein
0269873dee247b1076dcca2a9a117764	ATP-dependent_chaperone_ClpB
026bb8bc919b6433d3fe6a953fb9d07c	adenylosuccinate_synthetase
026d60b1a1d3abcf885cedd31de9e72d	histone_family_protein_DNA-binding_protein
026de6096b9debcc3743830b5abfd794	cytochrome_c-type_biogenesis_protein_CcmF
026e98abc7962f2218071f8f06400d7d	oxidoreductase_domain-containing_protein
02701923cf2980881d5fad509de7e4c5	AsnC_family_transcriptional_regulator
0270dfab0f9fffe066b43a5dff9a2f3d	ribonucleotide_reductase_large_subunit
0271fb40adf78ed021677e35fb47e347	phosphopyruvate_hydratase
0272168b37bc211af97621289210fac9	hypothetical_protein
02753f11cb238b9ef71bd62450283e8a	UDP-3-0-acyl_N-acetylglucosamine_deacetylase
027abc1ea65d06475c68cb1049419d7e	putative_inner_membrane_protein_translocase_component_YidC
027c86e8ccbeebcce5f33c6d944da1dc	VWA_containing_CoxE_family_protein
027cbf153adf421235105e5a6d3628a5	Ribonuclease_D_RNase_D
027e04c7d79aaf5fc0aa0c5ec43cb63a	dTDP-glucose_46-dehydratase
0281172068b727e45f7ba78726a8688c	phenylhydantoinase
02835e84c324f37ce7cc1d59db9490e0	NAD-dependent_epimerase-dehydratase
028446a4681b3816dd47ff89b728a046	von_Willebrand_factor_type_A_vWAdomain-containing_protein
028481f2e72f4bb00a22b313a6be35be	YCII-related_protein
0284b177ed42dfb1d001daee72c7fd39	sugar_kinase
028725075620a5a9ae61180ca65b5001	phosphotransferase_domain-containing_protein
028a5a453b36019d1bb3201fbceef7bf	ABC-2_type_transporter
028a7b44c2e3a0ee4ade8eece12f6d6b	multidrug_resistance_protein
028a81749dd79f492beed5fa3416399c	Heavy_metal_translocating_P-type_ATPase
028bc07916fdf5eefeda8a90f2274cc3	aldehyde_oxidase_and_xanthine_dehydrogenase_molybdopterin_binding
028cb7533d5ee3dcaa3bd2613522bece	acyl-CoA_synthetase
028d4da16756ada1b43a73b2626e37d0	putative_peptidase
028e65b7bce566fa2c9b586c96158f68	Homoserine_dehydrogenase
028f5d2857e65c60da64c85952bb65cb	oxygen-independent_coproporphyrinogen_III_oxidase
0290bbf80949d2cf27611339cdb2fef3	glucose_sorbosone_dehydrogenase
02914bc85d712d0bdea9ba4187e306cd	transcription_elongation_factor_NusA
02935940ddd93d685fc6f4960571abb9	isocitrate_dehydrogenase
0293abc9fd6d760f1ae7e423c4d8a5fb	Ankyrin
02947010ff19c30e4e3c1ca97551b6d2	pyruvate_flavodoxin-ferredoxin_oxidoreductase_domain_protein
0294ff83abe0c6e08083b394b3b57e0e	hypothetical_protein
029503d7690836e5b85757bf7eb285ad	mercuric_reductase
029854c042753cf589e5a99b332313a9	alkyl_hydroperoxide_reductase-_Thiol_specific_antioxidant-_Mal_allergen
02989dfc2c718c30e6888d5fff360b30	Aldehyde_Dehydrogenase
0298e5c319150568d6ffe04c03a54edf	flagellum-specific_ATP_synthase
029ac2fac335b6001a507dbf927398c2	L-arabinose_isomerase
029d51877f088a4af5ffe1502513e6a6	hydroxylase
029e33fe0911f3db31ba8d1fe8d9d2a0	membrane-bound_proton-translocating_pyrophosphatase
029edff081f80ed7de3e9bbe59007571	ketol-acid_reductoisomerase
02a0a95c5e9b18da4636c9d5583ea1d4	Homospermidine_synthase
02a2340948bb0efd1fea751c50b8532a	peptidyl-prolyl_cis-trans_isomerse
02a3fa4d7fcc8efaab97bfe8f611039a	N-acetylglucosamine-6-phosphate_deacetylase
02a41ce401eb6dca3bfba559c85496e8	flagellin-flagellar_hook_associated_protein
02a644cca00928be04136cb296fe917b	acyl-CoA_dehydrogenase_domain_protein
02a8e9c1fc3e91b7f8c9372a1100be8d	hypothetical_protein
02aaa19219879094df4ad0f3e9b329e9	putative_RNA_polymerase_sigma-24_subunit_ECF_subfamily
02b154c6a8e1a1ef890a3ac1287e6ee2	sulfatase
02b27a21269f1a1c8872472a457335ad	TraR-DksA_family_transcriptional_regulator
02b2a2173ad5f0f66206e869713b2bce	methylmalonyl-CoA_mutase
02b3ba7e4a0dbf795c19d2fde2eb3272	TPR_repeat-containing_protein
02b417990c115c3aec72fb28022141af	manganese_catalase
02b450b2846c154e7dd8709e53033fe8	chaperonin_GroEL
02b551e07e94fd5a894c611d92d769b4	ParA-like_protein
02b5c2feace8eefe69447caf092b24d9	putative_two_component_system_response_regulator
02b5d33610a4de6855b8c6b5fbd58fb9	glycosyl_transferase_family_protein
02b631f1a81e6ba70e2de897c5b7e03e	D-alanyl-D-alanine_dipeptidase
02b688842ac917947ef5d361c00e6505	gp55_protein
02b6b78dba7c9894b478fb90ef0622c8	iojap-like_protein
02b85252e4dbadab775b519dccab9100	hypothetical_protein
02b86324c9ecb3645ba88056e340d277	hypothetical_protein
02b90b08e8994ee7d0cc4527714d4cb4	catalase-peroxidase
02b9230e44bed4d088d5141807bfa41a	RNA_polymerase_sigma_32_subunit_RpoH
02b94317f3ac839c6856771b7fbbef9c	IclR_family_transcriptional_regulator
02baa0af58d0e3d84edc4626acd76007	glycosyl_transferase_family_protein
02bc6a17b3fac5522082ac43c2f83c5e	helix-turn-helix_domain-containing_protein
02bd0527d8e3c3133c2c296835ee37a9	ABC_transporter-like_protein
02bd58483f03a8b8afee02750c1f1106	cyclic-nucleotide-binding_protein
02bd67ee55e07173e01aefb303a67199	CarB2
02bd6c9521a60d3fde609a3f6b4e9177	ATP-independent_RNA_helicase
02bdeb8f0eccdfc33b6c47541786adff	glucosamine-galactosamine-6-phosphate_isomerase
02c1129b3e9058f85db220eb8ecf3692	ribosomal_protein_S21
02c1bdb27c1488cb3baff9b097128ba4	transposase_is66_family
02c1fb92b537d492ce0abd2930ad78f6	PAS-PAC_sensor_signal_transduction_histidine_kinase
02c1ff9f88515ec063e93318dba2da2a	PrkA_AAA_domain_protein
02c2367811f362db7aa89fd7c2d9ea2c	heat-inducible_transcription_repressor
02c2f15059bbe59b58cf70b32ff7a60f	integration_host_factor_beta_subunit
02c449b0e6ac33e72139110841b854c9	replicative_DNA_helicase
02c6a54558d2f0302a5a971050e358fb	ribose-xylose-arabinose-galactoside_ABC_transporter
02c7bdf796b8cc2e2e233425512c4cfd	p-hydroxybenzoate_3-monooxygenase
02c8ac398cd1f8af4ea611f294ed88cb	Polyribonucleotide_nucleotidyltransferase
02c8db51052265badaec64adf22acd2f	hypothetical_protein
02ca4c422de638165e08e6fba1facd78	binding-protein-dependent_transport_systems_inner_membrane_component
02ce5d32cba32caa241fcf14967ac9a2	adenylyl_cyclase_class-3-4-guanylyl_cyclase
02cf0287abb6f4993150cd1c457a57dd	3-oxoacyl-acyl-carrier-protein_synthase_2
02d0ce68c76ee99993e40f939557a237	putative_iron-sulfur_cluster_assembly_protein_SufD
02d1df4985229fcc6d42f3a46ff884ab	dihydroorotase
02d2e0d669b543e68ddedc30e920b3f2	phosphoenolpyruvate_carboxylase
02d42454a59793106a7f4d62309eb764	homoserine_kinase
02d51f2bcd3cb413fd73b898c0630da2	transketolase
02da46e03cb3ea2cc3f91cb02055dcb0	hypothetical_protein
02da72ad360ec89d8e0193061d7357af	ABC_transporter_related_protein
02daa0832de45401e20b3ee167462f9c	hypothetical_protein
02db73ddcfe0176efe0b7836ce97ff9d	ABC_transporter_periplasmic_substrate-binding_protein
02dd2415a6b19b073f812b70be178d74	50S_ribosomal_protein_L22P
02dd45e9dcaaba63ab40e6e0bf56dbd6	transcription_antitermination_protein_nusG
02e0e0d0ca9220bc2206c3c3591f95d5	ATPase_component_of_ABC-type_multidrug_transport_system
02e1b7013a0eeefd5022734038be607e	ribosomal_protein_S4
02e234d0841ef066d373288db53dc07c	ATP-dependent_DNA_helicase
02e4922ea7295e8f1d301aa4d5b024bc	phospholipid-glycerol_acyltransferase
02e802b9da48ea922fb6253d1b7f68a5	AMP-dependent_synthetase_and_ligase
02e84fdc90f847c5e07ff9b9d29d05f8	ABC_transporter_sugar_permease_protein
02e8e9cb6dcf0eb18081473df143cbc2	GDP-mannose_46-dehydratase
02e8fb3c62c0c8f4822125cf68a189fd	leucyl-tRNA_synthetase
02e9fe73394139b3f6fc9f89402eb71c	ornithine-acetylornithine_aminotransferase
02eb504fb7d1c03951812f0ccb8d5ea2	aldehyde_dehydrogenase
02ec5963c5f9befb25a63b496d1fb24d	DNA-binding_transcriptional_activator_GcvA
02edbeccc32305da3aeb2f6e0c78c5b8	putative_deoxyguanosinetriphosphate_triphosphohydrolase
02eed608b2cf42f39ceb8e39a4238e3e	RNA-binding_protein_Hfq
02efad6594e50625bdd7b9b2dac0807b	excinuclease_ABC_subunit_B
02f04fa0b9c1e6b788f77f5e27290017	beta-lactamase_domain-containing_protein
02f1c2b39f69c49137ff6e70b9f487c5	aspartyl-glutamyl-tRNA_amidotransferase_subunit_B
02f302e8b475a9c2baa49de7d4dd0423	SSS_sodium_solute_transporter_superfamily
02f34f116ec2b906a1cdb4f8a89f429c	putative_acyl-CoA_dehydrogenase
02f48082c6fe58955f5369bb6b76e47e	butyryl-CoAacetate_CoA_transferase
02f95f73693e0c099568821b91a8f5ac	glycoside_hydrolase_family_38
02fa8d6c85aa799f50a344f7c0c01c38	putative_quinoprotein_ethanol_dehydrogenase
02fb44949e1d52b7d30c2ca593e25552	succinate_dehydrogenase_flavoprotein_subunit
02fc415e9f65ec4ce7c4b199bfa7f30e	DNA_ligase
02fd0c217ac038ab7a42762daca9112e	Patatin
02fe7b2b2d347309ab734e4f57b25ab5	thioesterase_superfamily_protein
02fe8d00b9032374b4d48bafe4fbb496	2-isopropylmalate_synthase
02ff34af7f4c2d54def498f258168fc4	Kojibiose_phosphorylase
02ff64c206a9c2acaf26a5db6b02e8aa	putative_transposase
03007259594dd2d5c330a956a50996c2	methanol_dehydrogenase_regulator
03027b874af9a4e549913f2557ec3742	recombinase_A
0302b413316e32ef8f1f223fbdd20f84	hypothetical_protein
03035340eecb1cc39278735236016727	Amidohydrolase_family
03036048798f7d587858e4eebd742024	monooxygenase_flavin-binding_family_protein
03043894b261b915dcc1b4322ab65bb7	formate_dehydrogenase_beta_subunit
03043d6e42c337751e26cedd4bdd6557	hydroxyacyl-CoA_dehydrogenase
0304978f9253c8ac129f75022a1ed399	phosphoglycerate_mutase
0304b1e4434adfda6fef0d33381d12cc	LmbE_family_protein
03074bbe8d22467a09f7d4ff9d0370eb	phage_SPO1_DNA_polymerase-related_protein
03086bde3712470bc9f97aa73b0ad46b	UDP-N-acetylmuramate-alanine_ligase
0309784c048ff5378a1bf3c35d1db1f2	bifunctional_glutamine-synthetase_adenylyltransferase-deadenyltransferase
030b46baf139c771f4073195ab2d8279	bifunctional_deaminase-reductase_domain_protein
030cde8696a4ff06192773f1767fb932	aldehyde_oxidase_and_xanthine_dehydrogenase_molybdopterin_binding
030fd2d655aa3510b151c41fa122ac85	asparagine_synthase_glutamine-hydrolyzing
03109d5b1360dbaaa379891521d655af	putative_ATPase
031265c4a9a7fa2a7de5628bab9ab454	peptidase_U62
03161f854a4cbe87e23f1eca14040436	aldo-keto_reductase_family_oxidoreductase
031750c91afc44b449f6fb5593ddd619	3-hydroxyacyl-CoA_dehydrogenase
031752a88d31cece30b6cdaa234b0e8a	acriflavin_resistance_protein
03197064c376bf6641c0bd92775a8cf0	ABC_transporter_substrate-binding_protein
0319c88edeaf9952a66fff3e0371f803	M1_family_metalloprotease
031a1b58560803935333d02ebabd2adf	acetyl-CoA_acetyltransferase
031b26ac9803f7d46ba667bb37d12450	aminoglycoside_phosphotransferase
031c8f02a639048ede71cbf803c66a4f	protein_of_unknown_function_DUF1549
031f08c7815c078b2a90974277565c18	PAS-PAC_sensor_hybrid_histidine_kinase
031f22a58b3666c58a81032fce757392	ATP-dependent_Clp_protease_ATP-binding_subunit_ClpX
0322babd21985f5a74bf94f0aecc7532	hypothetical_protein
0323f4dc809180b4de364ff5a976b661	ribose-phosphate_pyrophosphokinase
03244a8f00b4c1760512b7493982cdb9	polysaccharide_export_protein
0324992801fdc40d6435110eb8ba3a5c	ABC_transporter
03267fbd0c9061692c8c4b3559d8412f	GMC_family_oxidoreductase
0327101cf8fdd35463bb5001c74b3452	Sua5-YciO-YrdC-YwlC_family_protein
032798e18af88c3afd129ccbe1570f99	recA_protein
0327ecdcd792b675ac21677bba3304ce	F0F1_ATP_synthase_subunit_beta
0329c45f0458f30796823646873f2ed2	hypothetical_protein
032a4642d4aae17c26a215f42dc40220	hypothetical_protein
032b6b6e76a917785b0a6d33773f9c72	beta-lactamase
032c1f5ac64ce3eb477798c838d882aa	two-component_hybrid_sensor_and_regulator
032df6143e00926d1fbccf6a4a2a6fe4	RNA_polymerase_sigma-70_factor_ECF_subfamily
032df81f27c371a3e84083672aaa04f1	hypothetical_protein
032e7e535909f89896dd2feefc81833b	putative_ferredoxin--NAD_reductase
032f602e2ef9d5536f803b2b01d7d7e7	peptide_chain_release_factor_RF-1
03306e6434a131b17b2bfeb6ebec88e1	Aminotransferase_class_IV
03326e1bd9cf245bec851c72189d4400	site-specific_DNA-methyltransferase_adenine-specific
03331014a8a949eb3c8d2b6f1f628898	hypothetical_protein
0333117b6ccaa9d189299a7ea1980235	transcriptional_regulator_ArsR_family
03346a4e5125935b2989d1cc26a46dce	aspartyl-glutamyl-tRNA_amidotransferase_subunit_B
033549082df1f5b425c3788784b85be2	DNA-directed_DNA_polymerase
033597b9cecc94f65053ace98a725f1b	hypothetical_protein
033753fddf5fc61d259dbdf55b1ff8ef	3-ketosteroid-delta-1-dehydrogenase
033963bead5cd99113776aa5a76f6927	Serine-type_D-Ala-D-Ala_carboxypeptidase
033a80d875e0c4b02989a54d299f84e0	hypothetical_protein
033d3290f1d9bf2737c3b0e179f8a1f8	Acyl-CoA_dehydrogenase-like
033da2e9f6c03bc6685596137afbda91	DNA_polymerase_I
033dcd444c4050907ddd63b4532b65ce	L-threonine_3-dehydrogenase
034050b05905a98f9c52f694484902ba	catalase-peroxidase
0342a1358fce9d8da6be0918a713ad81	ferredoxin_reductase
03459ade805ba9b30a3044f03e7b3ad2	pyruvate_carboxylase
034631462e3a87a923b46f86e913e0fd	putative_L-lysine_23-aminomutase
0347418bed1215bdf678be6355c90b8d	DEAD-DEAH_box_helicase_domain-containing_protein
03478437392f16c2075233cc29969806	peroxiredoxin
03488189728fdbf4a03fd4ebe0203355	hypothetical_protein
0349b964456c2cae67872a095d665605	formate_dehydrogenase_alpha_subunit
0349c0cd5aac03d1e58d92818292e720	hypothetical_protein
034a4f7f0187779ee7833de44be08cfa	hypothetical_protein
034ab2392c18d74204ceef46c526c3ed	30S_ribosomal_protein_S6
034ae3faacda9123f36fd7bf76f7f9bd	DNA_gyrase_subunit_A
034b0fcec19c4f7940592425b54a03bd	PAS-PAC_sensor_signal_transduction_histidine_kinase
034c7ad85a9f2da7684f4daa3853a703	protein_of_unknown_function_DUF894_DitE
034cd6acea92ec818303c527cbbc3aa6	ATPase_central_domain-containing_protein
034d34e553204e665c97e470011e48ea	uracil_phosphoribosyltransferase
034dbb98d27f63b2bb906e38fefa69a1	protein_of_unknown_function_DUF1211
034e4072e53dee8683923a6ed9690ea4	oxidoreductase_FAD-binding
03524b1c0635850711f7b884bd1ea9d9	phospho-N-acetylmuramoyl-pentapeptide-_transferase
035356264d376d18eb40490f6b2bdf04	ribosomal_protein_S1
03571e5d20d09059fd3d57d22690fe65	oxidoreductase_molybdopterin_binding_protein
0357d8ab924139036ef879d466da6e2c	transposase_IS116-IS110-IS902
035bc3ccd09625f10365d96407b94104	putative_outer_membrane_protein
035bca5ae9fdcdf390439d466ccdf0ac	PSP1_domain-containing_protein
035e13595194b179f7d0eaf548fb7945	phospholipase-Carboxylesterase
035e6a70c6396e955d4ced9f7b9dcab4	benzoyl-CoA-dihydrodiol_lyase
0360d8011208840d9e0efcba287485e0	putative_transport_protein
036190347961f388d5e308fe373406ff	GntR_family_transcriptional_regulator
0361dca997035f290c3519102c7a938f	type_II_secretion_system_protein_E
0362167e3d571f1bf1f5113d7fe31999	DNA-directed_RNA_polymerase_beta_subunit
03630ab806b5002296541c0a6e4c4961	transcriptional_regulator_winged_helix_family
03649ae3f7a7c71d88de1e7a42ed8219	molydopterin_dinucleotide-binding_region
0364b0966543e851168faa4f291f406c	acyl-CoA_dehydrogenase_domain-containing_protein
0364f56602c567c0177fe12fe3621de8	prolyl-tRNA_synthetase
036556bd9e38d365aebd57e4af363801	putative_ATP-binding_protein_of_sugar_ABC_transporter
0365af552116660904a09e90063cd56b	RNA_polymerase_sigma-24_subunit_ecf_subfamily
03665cd2ae10b29998772f4ee0d8ecea	GMP_synthase
036a8c9a6a7746b099fcd6a1615db50c	hydrogenlyase_component
036ef04360236d54c55a869f1f5149ff	hydratase-decarboxylase_family_protein
03702d69ea1febd9fdc8409b0814b1c9	NADH-quinone_oxidoreductase_D1_subunit
0370d9cb70e7c944c9eab8ea56b6fd7e	VWA_containing_CoxE_family_protein
0370dd1c3b5ab53ddc07d48f1af08b95	peptidase_U62_modulator_of_DNA_gyrase
0370f645c3ffd4aed28b82458e76f9a3	recombination_factor_protein_RarA
037387e28582a8aa983e9807f089a9bd	acyl_transferase
0373b9f583990e40909283d1897cfc58	RNA_polymerase_sigma_70_subunit_RpoD
03783373e1a730b10ead79d3f66797e6	GAF_sensor_hybrid_histidine_kinase
03792b90f50702810a1f9c0c92c86622	30S_ribosomal_protein_S16
0379501669466174b3fd80e9a8c9baab	UDP-N-acetylenolpyruvoylglucosamine_reductase
0379b8412e2cbc21b553026745647545	RNA_polymerase_ECF-subfamily_sigma_factor
0379de5b58aa142388887967ce440266	heat_shock_protein_90
037c8629c3d25880efd6095d08a172d5	enoyl-CoA_hydratase-isomerase
037e0aba2284d4a9408d0f36567f98e8	Peptidase_M1_membrane_alanine_aminopeptidase
037ebb9c04dd7c197da3a46054b84eae	negative_regulator_of_genetic_competence_ClpC-MecB
03809ec94ee1b985b57d2a94cbfb9057	RNA_polymerase_sigma_factor_WhiG
038256b3fe7b74e4be7ba6e0ac118655	NAD-dependent_epimerase-dehydratase
038408175e571db41157b18119241a78	integral_membrane_protein_MviN
03843685f79205d4a8c9a6e3daa16aca	hypothetical_protein
0385012478fcd7010a9b62949717898a	peptidase_U62_modulator_of_DNA_gyrase
0385eeaf80903f6878d28b3aa24b1b78	ABC-2_type_transport_system_permease_protein
0386b6cc07fed6727f689d0720ca4a97	beta-N-acetylhexosaminidase
0386e5da46f208e342a535144bb40d99	peptidase_M15B_and_M15C_DD-carboxypeptidase_VanY-endolysin
03884acad50b20ecd17382d3454ab30b	putative_ribonuclease_RNase_BN_RBN_transmembrane_protein
03893430e032e216b259291b443ecb3b	Carboxymethylenebutenolidase
038b268ff7b0ba8100ac957614bccbbe	NAD-dependent_epimerase-dehydratase
038d8fe7642d14a7f42dacba40988faa	catalytic_domain_of_components_of_various_dehydrogenase_complexes
038e42ae13e2947b27310bbc464b5fbb	peptidase_M50
038f61a514d55f2ff30674c6b8994dfe	aspartate_carbamoyltransferase
03927d4f5123da7b124729fada051140	thioredoxin_reductase_FAD-NADP-binding
03941ade092a46cd1ae676b0dae220cf	amidase
0394417a3e89f906a4660ace75d7cace	GTP-binding_protein
039485cec8d30eb7408df58057576586	benzoyl-CoA-dihydrodiol_lyase
039d2d0a1d9b9364351e8610ed14cd5f	putative_sugar_uptake_ABC_transporter_periplasmic_solute-binding_protein_precursor
039e2e76fb0c7749ff5838f52d1422c5	family_2_glycosyl_transferase
03a3915ca21978f88f4d46ba1231cd65	excinuclease_ABC_A_subunit
03a3a5a2d6a48c19e73602bb0398b8d8	putative_D-alanyl-D-alanine_carboxypeptidase
03a54192f58f19181bddf17fda247cc7	elongation_factor_G
03a69547f63dbf67d031cf36911b43b3	mandelate_racemase-muconate_lactonizing_protein
03a7a5cfc2f4683d634b3c3917d714dd	Na-H_antiporter
03a8b6aa5618c793dcafdf321d4e029c	acriflavin_resistance_protein
03a8cd4b2783d059cbbef22bd802acde	zinc_finger_SWIM_domain-containing_protein
03aaa00518bbc092163f0cad27326cbe	glycoside_hydrolase_family_43
03af2004acbdac00b08e522b7367e5b5	DNA_topoisomerase_IV_subunit_A
03b011a2403c0b49545cabf5325b318c	endopeptidase_Clp_ATP-binding_chain_A
03b0d448360c7a201c9ecff941a640b1	radical_SAM_family_Fe-S_protein
03b107eafb402232c8dfd1c416b2093d	S-2-hydroxy-acid_oxidase
03b16e875f29faaf2c36693786627761	integrase_catalytic_region
03b1a0f7dcfa1f9558a2be9a77559a44	diguanylate_cyclase_and_metal_dependent_phosphohydrolase
03b1b23e2e2d7a85c942179d01fe5104	aconitate_hydratase
03b29f6dfca999a89179d1097dcd7ab3	50S_ribosomal_protein_L23
03b37c5a62705f947f3b200c34d45942	chaperone_protein_DnaJ
03b4dd051ba2c4a078319121bf57fddd	preprotein_translocase_subunit_YajC
03b6c9f78d68b518c8408ce97b1923e3	CDP-diacylglycerol--glycerol-3-phosphate_3-phosphatidyltransferase
03b72ac6ede617fe145ff3060663e97b	enoyl-CoA_hydratase-isomerase
03b7d53c8d8f6f09bcf59d441654081b	DNA_polymerase_III_alpha_subunit
03b9c44c6058788a1a07b4340da212b6	RNA_polymerase_sigma-24_subunit_ECF_subfamily
03bb29ae3af2aed46e98ebfaf53c07e2	phosphomannomutase
03bbf23a8e69f81be17f8c3f1e04c851	hypothetical_protein
03bc60aad8dc1aafea1d2de63e4388f3	aldo-keto_reductase
03bd33dca9c20079a7b2403c9994c751	hypothetical_protein
03c0e2f50fa9368ec275acbe23a1a61a	transcriptional_regulator_LacI_family
03c2972d6453a66167694c56dfa6148a	RNA_methyltransferase
03c43c165d1c4477ac90f5bc66f27634	major_facilitator_superfamily_MFS_1
03c4c2b04b559baa58fb83138e196f27	uridylate_kinase
03c4dbb3f370c6a96cf8a9eb6cc310e9	GTPase
03c8dae91a3cddb2f0bb32612a8bd854	RNA_polymerase_sigma_factor_RpoD
03c914632172b5e5bed1de652b9a2d5e	DNA_topoisomerase_IV_subunit_A
03c930ee9178c21d152c720fe6e00e0e	protein_of_unknown_function_DUF21
03caa477219081cf61f55771c1d99ffd	aspartate_kinase
03ce478c7e6e61cfecec0de4ca4cf424	N-methylhydantoinase_ATP-hydrolyzing_A_2
03ce59c7a725cc410feea321eb9dc6fa	polyribonucleotide_nucleotidyltransferase
03cf80560a33dfda87d529c35390455f	DNA_repair_protein
03d10e57b7e1c89410e72b9d6a6c0948	proton-translocating_NADH-quinone_oxidoreductase_subunit_L
03d178a137bfcdf0b4fbfdd86ef10eba	urease_subunit_alpha
03d20c67527bd2a78ae47473ba3d6069	recombination_protein_F
03d329c71796fb358c252c14f07c02d6	CoA-binding_domain-containing_protein
03d4598b834ca7313674be3c4c6edeb1	rod_shape-determining_protein_MreB
03d45de2cfa6653132852f2d14842665	xanthine_dehydrogenase_family_protein_large_subunit
03d47b2cc358a88dab4f8eb795e53882	acetyl-CoA_C-acetyltransferase
03d52a0bb1d3129ccbd5d5a2762e4c74	fad_dependent_oxidoreductase
03d5aead7c485b1e35d8317efd3c3873	UDP-N-acetylglucosamine_1-carboxyvinyltransferase
03d9b6d53f84699a6e63012d8f81a9c7	Protein_of_unknown_function_DUF2126
03d9f7fae93cebe177f3bbbb4fcb7033	lipid_A_biosynthesis_acyltransferase
03db73bc7750a481ff1c6dae956e815b	glycosyl_transferase_family_2
03dce9d7dd5fd7941c3359ef79342efe	pyruvate_phosphate_dikinase
03dee07bcede832937fce496169a8792	ATP-dependent_protease_ATP-binding_subunit_ClpX
03e1ef058acda09fc1232523af78d309	glutamate_synthase_large_subunit
03e3124641b7896fefd084609a8a52ff	propionyl-CoA_carboxylase_alpha_chain
03e350e061ac23cf8b97332accc94518	EmrB-QacA_subfamily_drug_resistance_transporter
03e56a5bf819857b142e14610d6ecbed	formate_acetyltransferase
03e6bf18b62694d34609cf2380d2b4a5	ATP_phosphoribosyltransferase
03e6d5322ec505bbee2c9af60f9a73a0	acetyl-CoA_acetyltransferase
03e74329744433b8b823629e56301eb6	NADH_dehydrogenase_subunit_H
03e805f989282a73cb83bf6f2583c47d	hypothetical_protein
03e8b9928dd93c216d564a9837c12f01	ribosomal_protein_S2
03eaaf2a97db881585ca33c21147d87f	oxidoreductase_domain_protein
03eb8d34ccd3dd5328ae0e5053d30368	K_potassium_transporter
03ecbefef63a79299c4cb150a2f3553b	nucleotide_sugar_dehydrogenase
03ed33273a541e59d3e51249b1f9e97f	GTP-dependent_nucleic_acid-binding_protein_EngD
03edf07193625d7fadb377c681fd24f6	amino_acid_adenylation_domain_protein
03ee221e8b4a4ed4a44042f6b5f38d60	two_component_transcriptional_regulator_LuxR_family_protein
03ef2392f6fae372ca044974f6918b3c	unsaturated_glucuronyl_hydrolase
03efff1ac7fc0bb0f6d125b48546f5ea	band_7_protein
03f58267f86f4cc95eee7e0a5446c917	aldo-keto_reductase
03f7005babb319b0a55c7310b3b71484	putative_sugar_ABC_transporter_substrate-binding_protein
03f789dd099e2836602bc9c434598438	amidohydrolase_2
03f985bb97629391f988f151a142fcf2	Malate-L-lactate_dehydrogenase
03fd104ce998b59e56da0150ccaf839d	DNA_topoisomerase_IV_A_subunit
03fdc3a7a83f4082afd4edd133664469	oxidoreductase
03fdcefc25eb3c1ccde6ebd0ff30323b	putative_ATP-binding_protein_of_sugar_ABC_transporter
03febd4e728e4fb74b0f865bcc4dedf9	NADH_dehydrogenase_subunit_N
03ffc7c040e0d84e72e38858935529ef	cell_division_protein_FtsH
0400b0dd51238ce0510698f608d5f82f	secreted_protein
04021b92fc995f30f253ce03293acf0c	ABC_transporter_substrate-binding_protein
04035b3defd66badafb2799ce660e275	aldo-keto_reductase
0404f92703ea25eafdaf742ff67adce1	hypothetical_protein
04050adae8420f9ee25981a514bf5fc3	transposase
040593c919d31dff427f29e683b30ce0	nicotinate_phosphoribosyltransferase
0405ed042203a0b395c4246227d2b145	glycogen_debranching_enzyme
04064bab7c157937c0b42367d2040c4b	glycoside_hydrolase_family_43
04076b60b50f6e7e5a0db1455166f38e	oxidoreductase_molybdopterin_binding_protein
0409364b79f229891988abab9997d5cb	putative_sugar_ABC_transporter_permease_protein
040aa2244748a9d76c044cd4920e2dbd	aspartate_kinase
040b80c78522cc97a3930ca26b02e263	FAD-dependent_pyridine_nucleotide-disulfide_oxidoreductase
040c8bfe01f6c894195421956aadb877	gamma-glutamyl_phosphate_reductase
040d05bdb7574e0d5770b7e60d2aba38	aminotransferase_class-III
040dc7e5c605861b5fef7eb0e1aa92d0	prolyl-tRNA_synthetase
040f81bbd3b4c7d594d528d32584a2f6	riboflavin_biosynthesis_protein_RibD
040fd021e3c790f91d2f9c0c7465466e	3-oxoacid_CoA-transferase_subunit_B
041094f5d179b0f806d8d7abb61662f9	alanyl-tRNA_synthetase
04125dc35e2288807f6f3425aca63b36	GTP-binding_protein_LepA
0413afe64743e4c978c1c628aeafee0b	ABC_transporter-like_protein
041417a77c1e51bf8e1f83ebe161c12b	Linear_gramicidin_synthetase_subunit_D
0414e13a34361f483e9ef0368ccd4999	response_regulator_receiver
0416acad97c322feb95e87678824c389	ATP_synthase_F1_alpha_subunit
041a192baeae1a6bbeb6d05a160bb4df	cobyrinic_acid_ac-diamide_synthase
041b93658aad2ace78983108c5764c6d	glycerol_kinase
041d8060160eff54e291b3c755967602	peptidase_S8-S53_subtilisin_kexin_sedolisin
041e6c30e7a394880d84d259b4dc7197	cell_division_protein_FtsZ
041e8c80d2bfb8f32077a5cced10a0a6	3-oxoacyl-acyl-carrier-protein_synthase_II
041fcbe6c75aa23579fe8b00f0fff714	FAD_linked_oxidase-like_protein
04204f45404c2976c6e3ea62428d72f1	putative_multi-domain_non-ribosomal_peptide_synthetase
04224db00fb3f69358ff38d08e58de74	permease
0424d72319ac9ba0eb4363595d61879a	HPr_kinase-phosphorylase
0424fd24ac2b9a3fa9eb904d0ace540e	acetolactate_synthase
04282f02e3285885751c2e9716ef51f2	F0F1_ATP_synthase_subunit_beta
042a598a63a3ce1675308ace2d6d8497	hypothetical_protein
042bbdbc9f161c610f113387fd786041	hypothetical_protein
042dac9b791206eb6a4dce2812b38784	radical_SAM_enzyme_Cfr_family
042df12f9955397a3dd23781c531d38e	elongation_factor_Tu
042f3695aae7077c79a1750cc40e9b24	hypothetical_protein
042f4b09e30a02007a416d4c3288373c	gluconate_2-dehydrogenase_alpha_chain
042fbce5bf2c9a6fa16a2a10a581738c	DNA_gyrase_A_subunit
0431ae3edab9d62591f0c296f4331126	polyketide_synthase_type_I
0431b058c5534dd0e75436e00a3cb6bf	recombination_protein_RecR
0431ba03a1968828a0a26b0363026b4b	transcriptional_regulator_IclR
0431edd0cf1ea5d45bf77a0df1dd3ac0	SsrA-binding_protein
0431f339cbd20bf7997a378dc61882ad	aminotransferase_class-III_protein
0434049fab4bf763d371b06925b6a7c1	acyl-CoA_dehydrogenase
0434407c7a9c62c1cb39ae9a0346afc5	amino_acid_permease-associated_region
04357e2a1f2df73088cc04415a01d9d6	protein_translocase_subunit_seca
04378fcb3b6d1899ac021ac9c8d293d0	3-oxoacid_CoA-transferase_subunit_A
0437ae775f127a101f62100775e52b2f	inner-membrane_translocator
043c843e2962ff6137b9830f8ac6dab8	LuxR_family_ATP-dependent_transcriptional_regulator
043dfc883c00e63f351c6aca4e8220b9	hypothetical_protein
04419d9abf12ad949ad2090d5af6debe	antibiotic_biosynthesis_monooxygenase
04431439a9bfb777b077efc6180362c3	5-methyltetrahydrofolate--homocysteine_methyltransferase
044796f184e5f679dbeed3478919212a	TRAP-type_C4-dicarboxylate_transporter_small_and_large_permease
0447e39c02349f2e0c16061c71b12294	alpha_amylase_catalytic_region
044822824d26b38fa5c1adf5601973bd	hypothetical_protein
044a0f01e98641bfa2634f100630f2ec	cytochrome_c_oxidase_subunit_II
044ae64f4ea351dbace047a9eae39699	succinate_dehydrogenase_and_fumarate_reductase_iron-sulfur_protein
044bbc003b47a126454fc4e5416032e0	oxidoreductase
044bc17777cdde64bb34147008de1d0c	ABC_transporter_substrate-binding_protein
044c8222f156d7fff1d4aa4257a6c580	putative_beta-1-3-glucosyl_transferase
044e847afa37d2fa70503d74220ccc31	homoserine_kinase
0451f4ea882b177a3d93bd171db8ed5c	peptidase_M24
04520c80f66383561353f66986a8aee0	helix-turn-helix_domain-containing_protein
0452311c46fb0bfe0a40b4fede28a1bb	DNA-directed_RNA_polymerase_beta_subunit
045463db45cb59880664be15894f0f9c	ribosomal_protein_L20
04554d396fb0695e00cbf993a35c4f99	GTP-binding_protein_HSR1-related
0456507848c11303fc0938ebd0e2a15d	isocitrate_dehydrogenase
0456b310e9f3fc4e13757f368296fc1f	O-acetylhomoserine-O-acetylserine_sulfhydrylase
0458cb25e1ae55b9a2f9eac3d9167434	Short-chain_dehydrogenase-reductase_SDR
0459126bc1217fd956e35dee883f3bc4	acyl-CoA_dehydrogenase
045c674bca02b0e131448c68f4600476	hypothetical_protein
045c9ed60ef00e680a1720b74fe9aa8c	methanol_dehydrogenase_regulatory_protein
045dc5f7f6e22f3a57321e6f9780e830	alanine_racemase
04603ea766cb80090dd5e8eec93b7426	methionine_synthase
04609985ed2c01b95e305bf3a2548ee2	3-oxoadipate_CoA-transferase_subunit_A
0461009f0b2cfa3833ec8d74f831cfe0	glucose-1-phosphate_thymidylyltransferase
04612c817c06d6c8532aac0f0e19d187	UBA-THIF-type_NAD-FAD_binding_protein
046221f8edf654426771b24f42fc8965	two_component_sigma54_specific_Fis_family_transcriptional_regulator
0462ebaea65bf4a61eb83cec3fbf9080	hypothetical_protein
0464d5bb52fffae601db2d0d5fa2baf4	protein_of_unknown_function_DUF1680
0464db830d8931b58961b5a98d59548f	hypothetical_protein
046560de025a6d34fdd5132e615ec6ee	hypothetical_protein
0466722e267db59ae1bbadb3e4fc8e5e	thymidine_kinase
04672ac584179a95d3684fef0f6f55a9	two_component_transcriptional_regulator_winged_helix_family
04678174e7e75c02a592802820673647	two_component_transcriptional_regulator_winged_helix_family
0469aee9cca47a6a3f1b24b5932151b9	Undecaprenyl-phosphate_glucose_phosphotransferase
0469d7cbb66a771ec7251c3074e213cf	phosphate_ABC_transporter_ATP-binding_protein
046a2751c89359a6a6e8e1ea31cc0dfd	leucyl-tRNA_synthetase
046ac6549f920ba542b557c5e84f0116	putative_DNA-binding_protein
046bed54ad9a83175a05fd9d62ee76d1	ABC_transporter_ATPase_subunit
046e48c46a166c7f3a4991b9edb90411	enoyl-CoA_hydratase
04701f973b55b8c924a53d45a36e33be	elongation_factor_Tu
04709a1f60b7d9f7f81cebcdd42f5bb8	hypothetical_protein
0471c42cb6c048d987aeed2349d0eded	50S_ribosomal_protein_L2
04732895bc65a54d9f7c5dc9ba8398c7	aspartate_kinase
04738ee3a03d468cfdb8ddb0cd7d341f	DNA_gyrase_subunit_B
0475676a6d968d6358ef96ebb4759b2b	two_component_transcriptional_regulator
047619f052b62f03fee09f5b267a3c37	FAD_linked_oxidase_domain_protein
0477617db4ce5f5394e90a582d27d54a	histidine_kinase_internal_region
04777d766f663f0c03a02cfaf80d7ddc	DNA_polymerase_III_subunits_gamma_and_tau
0477dc8ea8c595703d7f6cf4406934d7	polyphosphate_kinase
04780814197075a38d964377eefefdb3	DNA_polymerase_III_beta_subunit
0478d472c5e2cfeb442f66845a58a689	HipA-like_protein
0479a2662cd1ccc5c6a1e7e76f3eb9f8	phenylacetate-CoA_oxygenase_PaaG_subunit
047ab0f15c1fb4a27daa94bb1dd6cf3d	diguanylate_cyclase
047bc4d5f0bfbd17c1d2f58cdfce3d4f	hypothetical_protein
047c774ab2beb9aeed6c78f81ec22441	formate_dehydrogenase_family_accessory_protein_fdhd
047d137cd411e33a9f114cff389df75e	beta-lactamase_domain_protein
0480ac5fd0748a97aa777c1eb5d56948	putative_TRAP_transporter_extracytoplasmic_binding_receptor_component_dctP
0482b4f430e27e9e1e279a75b6a6b3d9	transcriptional_regulator_gntr_family_with_aminotransferase_domain_protein
048327bc0787c2bf69d326b91a591e61	2-isopropylmalate_synthase
0484b9fd452896abde5ff8d37dbe0913	putative_flavin-containing_monooxygenase
048568b87bb7e4f8997c9c7124a46476	thiamine_pyrophosphate_protein_domain_protein_TPP-binding
0485dcdc7e9370fdc144c1e9c5bbb7be	hypothetical_protein
0486ca5561db3d8147a6eb6ca4c04c66	branched-chain_amino_acid_aminotransferase
0486e9c11de5d95a21f4e0fd1a12eb29	putative_oxidoreductase
048986845c36fa4d5108ddf68caf898b	chemotaxis_protein_CheA_C_terminus_homologous_to_cheY
048a4d6e0ae121cc4f1eb2e164902dd0	cysteine_synthase
048b8c431896ea943dce30a13a462b8a	probable_sugar_ABC_transporter_permease_protein
048d504eb5b7c72888415c6c3b272c61	UDP-glucose-GDP-mannose_dehydrogenase
048e385f3aa0a38d20698b0880f06c83	NADHflavin_oxidoreductase-NADH_oxidase
049143e71656e048c8965d4b9529e16f	HlyD_family_secretion_protein
0491cd135d74b94d15df9e354e91badb	binding-protein-dependent_transport_systems_inner_membrane_component
0492852137b1213b26ff86c30e91fff6	NMT1-THI5-like_domain-containing_protein
04929b39950fb2f314ea90430044390a	multidrug_resistance_protein_B
0494af88ce35db8ef4fb454c51ded648	hypothetical_protein
0495d2bfc6459a6f071bcf40debeb172	binding-protein-dependent_transport_systems_inner_membrane_component
04967476e087200381b224d7e60400b4	phytanoyl-CoA_dioxygenase
04973d751bf9b6ec3685497358c08d47	NADH_dehydrogenase_I_chain_F
04980c162cac5f840744882ff93c40fc	hypothetical_protein
0499f0de724393967ef2eccc029e24d0	acetyl-CoA_carboxylase_carboxyltransferase_subunit_alpha
049a99181eee60171a003594feaeed89	PHP_domain-containing_protein
049bfeaf6186827636560435d45de08c	GTP-binding_proten_HflX
049fb8dc1b13cb6f72016bb31ec40b38	amidohydrolase
04a0b5447c66fa34cb0526b713a84ee8	peptidase_S41A_protein
04a1ea0f105c8f1d64f987f6f0092d9c	metal_dependent_phosphohydrolase
04a350c7a5518a6a4025ef8a17991d72	Amidase
04a36531d4735067754de99c6eecb13f	branched-chain_amino_acid_ABC_transporter_ATP-binding_protein
04a3be64d3c5d39983d9339500a46c41	beta_lactamase
04a4246ccfaaeeb9eda5fe7315d50a5d	RpoD_subfamily_RNA_polymerase_sigma-70
04a50ae15544e7f1b834f2211b315bb5	TonB-dependent_outer_membrane_receptor
04a736f9795bc5172f8ed96495009ba8	hypothetical_protein
04a83ca6d03a0421bbc8eb77a45f9e9b	dihydroxy-acid_dehydratase
04a864f1db3d22b2b515d4ed4945a8b0	protein_of_unknown_function_DUF34
04aa35bbf745c99017e987e0eaf5e195	aldehyde_dehydrogenase
04ab01fa0eb51b3de53dc47abcaa01d6	protoheme_IX_farnesyltransferase
04af3b38dcf030d2a4ca32d0538a37be	3-isopropylmalate_dehydrogenase
04b0283b2289ae5b967d10b1bb91b802	elongation_factor_Tu
04b02c30d76865673c8c865ac6b9864e	major_facilitator_superfamily_MFS_1
04b350c63e6d538d245ef1e06a1d6c6d	NADP_transhydrogenase_AB-specific
04b51278b1e0f78eb0595a75306faa3d	acriflavin_resistance_protein
04b52f2cce1edd4db67de77023fae889	shikimate-5-dehydrogenase
04b541e4b782151f41d79af2e99306a2	beta-lactamase_domain_protein
04b779f2c014aa0ad73a6911b03e21d5	Transcriptional_regulatory_protein
04b7ad31476ce2182272f813c539b896	asparaginase_protein
04b83887230594b56e7b187f5e1bb368	DNA_polymerase_III_subunits_gamma_and_tau
04b864ce869c52ceaef608bf28ee7458	tRNA_pseudouridine_synthase_B
04b9130d92d65091d29a9dcd27002821	Starch_synthase
04b9c9717cf803b6c8bc51fd6776b00e	GTP-binding_protein_Obg-CgtA
04b9e6454d539f9f43f1006d655dcc9e	hypothetical_protein
04ba34bf830fbdc169e01203baf794c3	excinuclease_ABC_subunit_C
04baecff2ee3d5d0165f09a841c75f6c	transcription_termination_factor_Rho
04be4e0a2c334dada336a5f91fac9914	30S_ribosomal_protein_S1
04bf1a764a4b6e6f87319c4b3a2d0ce0	hypothetical_protein
04c144019af5e90f73b95b67ccfb5a04	Inositol_oxygenase
04c2aa00d6f9f678d1421653278fe125	hypothetical_protein
04c2e17e268e62ef1bfc62e333eb06c6	threonyl-tRNA_synthetase
04c3f1fa990bff0c219f279d7f716510	cytochrome_c1
04c67dd624c0443cae6e163f9de25b88	hypothetical_protein
04c7ef360724e06c934cde88e46510d5	4-hydroxy-3-methylbut-2-en-1-yl_diphosphate_synthase
04c92aca9a40e1f457ffbb22565c8f25	cyclase-dehydrase
04c9d9f89688191db42d169bee8c05a3	phosphoribosyltransferase
04c9e02fbb7498f2d1b372990a6039df	hypothetical_protein
04cb60bb42110e8384cb3033901b31c2	DNA_methylase_N-4-N-6
04cbf35f4115927a2258350bb62aed5a	DNA_gyrase_subunit_B
04cc5f28ec29dc4f734e451ac407d6b9	5-oxoprolinase_ATP-hydrolyzing
04ccda8ce983512bc0920bf2f93e6434	DNA_gyrase_A_subunit
04ce3bcbe8c53b148b85e16e2fb1b4ed	transcriptional_regulator_LysR_family
04cee212fadb325cc049352d0bb9cc6d	glyceraldehyde-3-phosphate_dehydrogenase
04cf4449ce5fa47a0ec963f5d057493a	putative_thioredoxin_reductase_FAD-NADP-binding
04d14d584e649d26635255f89a9c79a7	vitamin_B12-dependent_ribonucleotide_reductase
04d1aa35bf1191714eb4574cc9bc5455	homoserine_kinase
04d373adc64b3469a09274b96548024e	long-chain-fatty-acid--CoA_ligase
04d42c83c0598079b3e75d538419d198	putative_endopeptidase-peptidoglycan_hydrolase
04d4fae94c5504ad30832151c54ddf6c	ribosomal_protein_L17
04d55646d20b1477e065d40274894305	TRAP_transporter_4TM-12TM_fusion_protein
04d57fee5b7a49f07d7f4d734d798f19	ATP_synthase_F1_alpha_subunit
04d8031956e20a42f8626637fcbc2474	hypothetical_protein
04d8481658efd44293f61a8a5c6acab4	phospholipase_D-transphosphatidylase
04da8cee7cd679d7b1bebd54c23bff5a	ATP-dependent_protease_La
04db38e405dd7f4a007cfbb98f96ca91	enoyl-CoA_hydratase
04dcbef325a5a5fef1371afb38dd0d42	molybdopterin_oxidoreductase
04ddf4c7ebeee1873cd96f41b705a04c	ribonucleoside-diphosphate_reductase_adenosylcobalamin-dependent
04de8996b5bc1fdeb42f17980b9a9f54	transposase
04e010c4a1d23b9700dd58c46b260246	cell_division_protein_FtsK-SpoIIIE
04e15d0a5135aa5bcdb7842609e11d05	ribosomal_protein_L20
04e1902eab4aaed3df74ca8f1d936a3a	50S_ribosomal_protein_L11
04e317daec0efa82344dfa08beb285af	hypothetical_protein
04e49785b72f3dc1bbada8bd86330cd8	2-dehydropantoate_2-reductase
04e51498c1434bebc17bcb5e3ef84cd8	ABC_transporter_related
04e63232a98438fe9ae3153d1029b771	sulfonate-nitrate-taurine_transport_system_substrate-binding_protein
04e63a184af29ad99c0a7629c064cbed	NADH_dehydrogenase_I_subunit_F
04e6e9e616c6b9403e4689233784de90	AMP-dependent_synthetase_and_ligase
04e7aebfb0f620eed97dc691a80dfbd7	two-component_hybrid_sensor_and_regulator
04e82b544e6494330bf7ba409392e65b	3-hydroxyisobutyryl-CoA_hydrolase
04e919b1312095bb529468267c20be2b	ribonuclease
04ec2e70e321a3268585023a77ba4061	amp-dependent_synthetase_and_ligase
04ec3f92e8f84fa13bc3696e2310ae9a	hypothetical_protein
04eda607b0fbcb02e35e0faae542378a	phosphoribosyltransferase
04ee2411ca1daee5826db5cca47ee68f	RND_efflux_system_outer_membrane_lipoprotein_NodT
04f2323ac89d0aedff62f200e81eb8c4	FG-GAP_repeat_protein
04f2b51f79bd4e9d2847ebb98fa25a97	30S_ribosomal_protein_S12
04f2d2ff130fb91506e140fb7148880e	short_chain_dehydrogenase
04f3b3a004d24f393eda0f06776e498c	HAD_family_hydrolase
04f55464a92c144fc47a0288735496b0	alkane_1-monooxygenase
04f56b11f317fbec54ef38fcd6d3d989	gamma-glutamyltransferase
04f8a8a725f510683f6bb7dbb696a496	carbamoyl_phosphate_synthase_large_subunit
04f8acf60b637ec03b945b92b7dc47f8	6-phosphogluconate_dehydrogenase_NAD-binding
04f94a0ef7e67aa17c11e9e38a4481a2	ferrous_iron_transport_protein_B
04f9a70b4585149934a6816a64c646b0	putative_branched-chain_amino_acid_ABC_transporter_periplasmic_amino_acid-binding_protein
04fa7ce4b824910057c43686b252c1da	ammonium_transporter
04fba1d8c0b65deeac53f93dbdaec7c5	UDP-glucose_4-epimerase
04fd246ec878099b401be6b52c470e6b	superfamily_I_DNA_and_RNA_helicase
04fd4cc6c95b42a997168c352abf5446	excinuclease_ABC_A_subunit
04fdc193033934685ca63c72ae879f06	sporulation_regulatory_protein
04fe042b167133ad385727559177dce3	cyclohexanone_monooxygenase
04fe5575fd50920607be631afd10da08	methylmalonyl-CoA_mutase
04ff3bf0e761b58b869bcffe24f2aeb0	DNA_repair_protein_RadA
05006707dea9afa0a5746fc36cf4d125	Histidine_ammonia-lyase
050186c2c2809f4904ccfa7a3f572e10	heat-inducible_transcription_repressor
0502dbd1873e87c80398f2a759c6f772	molybdopterin_biosynthesis_protein
0504649cd1c5e347cc01bb9f54f19d72	DtxR_family_iron_dependent_repressor
050481b25e78fb0cf773eb28dc3b74f4	Glycerol-3-phosphate_dehydrogenase_NADP
05049d1711ad979edd65a7207b79fcc9	coproporphyrinogen_III_oxidase
0504ac571856a7b54e942da10b7d2613	dihydrodipicolinate_synthetase
05057216aff5caf116e8d01153064007	transcriptional_regulator_LuxR_family
050641444f5eabb75d2ea63aee4ecc26	kelch_domain_protein
0507ae26545f18f910ce2545c73f33d7	s-adenosylmethionine_synthetase
0508e89c8329446da7f6e399726675b6	vitamin_B12-dependent_ribonucleotide_reductase
050aceaef3631a41c142afe74625ddae	Carbamoyltransferase
050e696ccfbecce06f95330c80801961	GDP-mannose_46-dehydratase
0510b6f23548854ef5893f5f2f94928c	polysaccharide_deacetylase
051267d3c5338c854d91dd4cbd2e57cf	precorrin-3B_C17-methyltransferase
0513985bd6e1216845335d018006d8ab	cell_cycle_protein
0513e437c8ab3365b9f1a0098c6181b0	hypothetical_protein
05149b342a73807106f1bed89d968bfb	acyl-CoA_synthetase
0516e53beb25aef0e191aaae6a381db7	Na-H_antiporter_NhaA
0517b5db75d6c3940eeefde32356e11f	GGDEF_domain-containing_protein
05187a9693a949d5bcc4e7a3e89d7d89	branched-chain_amino_acid_ABC_transporter_ATP-binding_protein
05193e021a630cd847edd529f826071b	Xaa-Pro_aminopeptidase
051b450e90143fde0a4296f11ddd4a6b	hypothetical_protein
051c0401cf9f03bdafb448a54a5c9add	hypothetical_protein
051c5622c6deef66d1f6210cd1ce5389	peptide-nickel_transport_system_ATP-binding_protein
051ce083d247bbe9e0a6f9812232fbed	radical_SAM_domain_protein
051ce287fcca0a07526269d6b02dce71	hypothetical_protein
051fcd7a1434384ef36804358fafdd62	DNA_gyrase_subunit_A
05207aff39cb8a40fa479cbb306dc8f8	3-phosphoshikimate_1-carboxyvinyltransferase
0520a8cbd9b439142a8d1c27ad914bbc	N-acetylglucosaminyl_transferase
0521dca33959be84a92307a66ec3710b	oxidoreductase
0522626bb035b18173d94553ba433dbd	hypothetical_protein
0522d044099ea883c0ccaaa8858e4054	ECF_subfamily_RNA_polymerase_sigma-70_factor
05241ecca8e86d1feadc5b040d4b103f	ammonium_transporter
05256913c347b7e199b0c2851e140999	Indole-3-glycerol-phosphate_synthase
052594ef594a0d7a7cf42ce77e42d4eb	hypothetical_protein
05268fb91bf3ee7b0fc8f0476a85dc93	ABC_transporter_related
0526a2cb2de500c8d4896edf1ad75e1d	sorbitol_dehydrogenase
052723f490c311639c559128ce019125	periplasmic_binding_protein-LacI_transcriptional_regulator
052771c781838e49c22628ea68a49f62	membrane-bound_dehydrogenase_domain_protein
052773ab6ec3a931db02362c55e426cb	DNA-directed_RNA_polymerase_beta_subunit
0527a1e9ab01d456261f2976de92d86f	glutamate_synthase_ferredoxin_subunit
052bb5cefd2412b7ed838f32bc0d9a94	hypothetical_protein
052e3e0fdc9efc350eefd55df5cb2ef5	two_component_LuxR_family_transcriptional_regulator
052ea91676ba67cb3466e9e4753c948a	UTP-GlnB_uridylyltransferase_GlnD
052ee3e6e70e7c25c8a62c02271c5d13	4Fe-4S_ferredoxin_iron-sulfur_binding_domain_protein
052f5feb5775ec01795082550993ab4d	hypothetical_protein
052fa489ce8636f69de5d747b35228de	hypothetical_protein
052fe65e14eaf76c1e796a3a43f3b908	DNA_repair_protein_RecN_recombination_protein_N
0530ed8a526006a0a43f99d11d7ec152	30S_ribosomal_protein_S18
05311997aa96788e9169d153ad5f657e	purine_nucleoside_phosphorylase
0531c8b0559eb99d9d094f5413bde801	chromosome_segregation_protein_SMC
053401b166250ffd7be3f3f036adf05b	HlyD_family_secretion_protein
0534f5ae8eb68318a0bc224da7a2cfa8	glycosyl_transferase_family_51
0535505e2ab9f89d99d8d068adcb8ac2	putative_bifunctional_4-alpha-glucanotransferase-malto-oligosyltrehalose_synthase
0535fcd62630cfcb4cd31a5436ab5cfb	1-deoxy-D-xylulose_5-phosphate_reductoisomerase
05374d8a323455fede1417d889a19e2a	putative_IIa_component_of_sugar_transport_PTS_system
05387afee0c9494ca916a406c41b08c3	Carbamoyl-phosphate_synthase_L_chain_ATP-binding_protein
0538aa3f3370f0ca4f620a57e949747d	hypothetical_protein
053a3e016d92434a21aa663bee74c575	3-oxoacyl-acyl-carrier-protein_synthase_III
053b3d9d64fb4b096a3b683246db3945	hypothetical_protein
053bd26c1de081b5c9d3f6042bc8fbf9	hypothetical_protein
053e15779083f611bc4d6e4adb9e60a8	undecaprenyldiphospho-muramoylpentapeptide_beta-N-_acetylglucosaminyltransferase
053ef1d12815fa9ec3cbb7ae1350c3c1	GCN5-related_N-acetyltransferase
05403c1e395bbe51eacdd13503d350e0	30S_ribosomal_protein_S8
0541ea59e3ebfd14402a62207eac60c9	B12-dependent_methionine_synthase
0543409644d4acc9b084d9c959d459f2	urease_subunit_alpha
054363c6238fc6055b77c8f3616a457d	extracellular_solute-binding_protein
0544065e9e63375a518baf2d547c90bf	dihydroorotate_dehydrogenase
054412a98f67f12023edfb06baa1bdf7	ABC_transporter_related_protein
054430a400dc00b93a8485d354651ce2	2Fe-2S-binding_protein
0544a1b9f9dbd3bb254e1548f8b20699	alpha-L-glutamate_ligase-like_protein
0544c9010c031a29a2f601fbecc96d57	hypothetical_protein
0544fa67dba5e49025f83ad44567fd05	thiamine_pyrophosphate_binding_domain-containing_protein
054606ec73b090a6376b83c31a98c115	aldehyde_dehydrogenase
05467bf28f2fefc91c5bc8e5b5244ecf	non-ribosomal_peptide_synthetase
0546bef18246be949b4eb31d8a44db2f	OmpA-MotB_domain_protein
05477f1e684c62ccb9b30dace0c56874	peptidase_S10_serine_carboxypeptidase
05478a9f3a63451987d61a6772087f65	serine-threonine_protein_kinase
0547d2f8f0ba2c1a6ecf205718061bdd	acetyl-CoA_carboxylase_biotin_carboxylase
05492e0742bfb23f8973549c3f8d7728	bifunctional_phosphoribosylaminoimidazolecarboxamide_formyltransferase-IMP_cyclohydrolase
054a928b27ca899c6ff4725748054381	hypothetical_protein
054a92aa834f58b0981fa99f4251dd69	Mn2-Fe2_transporter_NRAMP_family
054b62584a9a92237529cce62f117c09	hypothetical_protein
054c3722caf27c2271e90bbae7fbf818	cytochrome_c_oxidase_subunit_I
0553eb1b67dfe965796fd6cb15a2bab8	putative_anti-sigma_regulatory_factor_serine-threonine_protein_kinase
0553ee5fa70e6150b5bdf9466e9b182b	histidine_kinase
055418908dd259c64e47a43857851bc7	hypothetical_protein
055556d38842916662a180c2247685c4	replicative_DNA_helicase
0556121af852534c960557759851733e	amidinotransferase_family_protein
055655746a2f17269f68260eda91256a	ribosomal_protein_L5
0556ce82fcbc938ee83926b593fc49af	GAF_sensor_hybrid_histidine_kinase
0557d7655fb553a0f3ba7e5827a182c7	molybdopterin_oxidoreductase
0558cc0c960d52f037a6477a129f139f	sulfate_ABC_transporter_ATP-binding_protein
055942b91b6a8f661adc43b5cd708b09	aminotransferase_class_III_family
0559e897a1efc693c2838041dcb29008	ATP-dependent_protease_La
055b6f23029ffee302c846767d29cb3a	aspartyl-tRNA_synthetase
055ca4bd5e2706185034c1584d7c655d	translation_initiation_factor_IF-2
055ddd5857b251e684d22c02f479dd6f	beta-lactamase
055ed98c53216a2f4e441f2a19ab4836	beta-ketoacyl_synthase
055edaf9580715bbf4d8398976d32466	hypothetical_protein
055f58f0c6f2575800bb1875cb3d44cb	tartrate_dehydrogenase
055f639e6991655ebb25db7c56f94301	tryptophanyl-tRNA_synthetase
055f98926ef1d184ee9106fadda0d4f9	Alcohol_dehydrogenase_zinc-binding_domain_protein
0562200e583d70044adcad96f3fa522f	transglycosylase
056281946cea3577c40f93957b37eccc	3-isopropylmalate_dehydratase_large_subunit
056374e5f6cc04a751eee30a97135068	1-deoxy-D-xylulose-5-phosphate_synthase
0566947b84fca9737370c956a93587a7	TonB-dependent_receptor
056ae0b79e2c3c5b69fc1be81d21d07e	NADP_transhydrogenase_subunit_beta
056b3cee5c389fe2228bb0726bfd6788	heat_shock_protein_Hsp20
056c04b60640d4e6ee62431a6e96f666	hypothetical_protein
056cd4c91184bdb2adf83659f39bef78	histidine_kinase
056d0a2f3fbb65a1c8b385c68a9d23fa	ABC_transporter-like_protein
056e6de495f58f47d5d6901c1f8b8150	1-pyrroline-5-carboxylate_dehydrogenase
056e884f677e1a07b96081908da7ea1e	DNA-directed_RNA_polymerase_subunit_beta
057012c379e65dde8e7e36a5e0984a43	aminoglycoside_resistance_protein
057052625f822f50ffa6325468a33a7e	chromosomal_replication_initiation_protein
05705b67c69563d3dbf01f066cfbc0cc	transcriptional_regulator_LacI_family
0578ab065eba1e5941a67d0f4471f446	valyl-tRNA_synthetase
05791d086602e4389cbfb8ed9b2f7d1b	ribonuclease_E
0579a73eaa482ba5fc6fd00262d29b16	putative_transcriptional_regulator_family
057ba0975955643b831ffc1c43afd196	hypothetical_protein
057c3d9272ba2dd7b702446e18bc2108	chaperone_protein_DnaJ
057dff68255d7c5a70c0cf42ec32c703	ABC_transporter_periplasmic-binding_protein
05808df02565668428bff9d3fc201733	ABC_transporter_permease
0581e9f979552ba9080ff35c45a422d2	excinuclease_ABC
0582ad28c9225c35154d5f92ceee0184	hypothetical_protein
05868ced6aa8ff6d6711b57c7c9a8d3f	adenosylhomocysteinase
05887e52af92782f90442d01c4f9f732	Glyceraldehyde-3-phosphate_dehydrogenase_type_I
058a1e2d3cbae336385d350c2ad8b50f	FeS_assembly_protein_SufB
058a9759f74bfc1df17c741a94d4c6fb	isochorismatase_hydrolase
058b4e4ea3743a5cf0498dadceb0d2a3	phosphoribosyl_isomerase_A
058b509c99125137ad5bfddda42b1fe4	acetoacetyl-CoA_synthase
058da544934c7275a334db7fada9da1d	Heme_peroxidase
058ea459fb1cc5fc293a787f881f55a5	cell_division_protein_FtsK-SpoIIIE
05907a5f8c876db9e80f959a889a856d	GTP-binding_protein_LepA
0590aeddf0aa3c46cb80330f0c5ff15b	hypothetical_protein
0594c099044fc0710c3e083c5ebcc0eb	alanine_racemase_domain_protein
05951e262768884b7d271c7eccd40a2c	peptidase_M16_domain_protein
059531969a965f7410d41bda2b593fa6	succinate--CoA_ligase_ADP-forming
0595740779280227a55bce197c9630fa	penicillin_amidase
05960e6744aee1bc3eedf46074ad1238	glycosyl_hydrolase_BNR_repeat-containing_protein
05980b9376043a82b0f14498fd6d5a32	dihydropyrimidinase
0598a5acb374d9eb80b67d421fba4944	signal_recognition_particle_srp_component_with_45s_rna_ffs_protein
0598d351a47c6d2c96374ae7fcd80b24	hypothetical_protein
059913b23de156f3338a27d52b1689d7	transcription-repair_coupling_factor
05993bd16a93fe9e26967ff2cfad4588	NAD-glutamate_dehydrogenase
05996099dd263e70a6eb69c325af7a77	peptidase_M50
0599e85f2d32b5c0e64e263c9d139bcc	DNA-directed_RNA_polymerase_subunit_beta
059b98d29f315f0e520185d590512068	50S_ribosomal_protein_L2
059d439cb79dc7e6ac79e4f62d258591	glycosyl_transferase_family_protein
059da0fd3d791b28ccef0be8cad7f188	NADH_dehydrogenase_subunit_L
059ecac2c285c9cc767abbb09e08a0f3	protein_of_unknown_function_DUF1501
059f3e258e60e72e2bc40f5f7ee9f8cc	NADH_dehydrogenase_subunit_L
05a2a863ca8d9769ce6ac54c436917ea	aldo-keto_reductase
05a2df257d7052c2acc461ada0045a93	putative_DNA_polymerase_III_alpha_subunit
05a2ea0ab6401ddc71257478304f13f2	N_utilization_substance_protein_A
05a3bbec68c53b3ac7ad8fc62d637d05	dinucleoside_polyphosphate_hydrolase
05a4c7d9e77788854a5ebde7168f53ea	hypothetical_protein
05a4cc4ba25d96acb3138c775f5b9a98	DNA-directed_RNA_polymerase_subunit_alpha
05a5067c51681f365c9f82a3089507b7	pppGpp_synthetase_I_SpoT-RelA
05a541a1534149a1b3452889a53c991d	ferredoxin-dependent_glutamate_synthase
05a55debc14b481df6b98fe49770ac1c	30S_ribosomal_protein_S10
05a63231ffea6f3067ec63539c307db8	Na-H_antiporter_NhaA
05a6c49c24a58f1b51126127d79cb898	UDP-galactopyranose_mutase
05a7050dfa858f088c42614e7937302e	two-component_hybrid_sensor_and_regulator
05a710fd56edf3b1992f04f15ff9b492	transcriptional_regulator
05a766cc7ca3b5c3e4b0816ad717b8e8	50S_ribosomal_protein_L18
05a7ac6a747c18d805cb8ef759e6fc74	carbon_monoxide_dehydrogenase_large_chain
05a7e349e5ce116fee95c8d5a40f61c5	pppGpp_synthetase_I_SpoT-RelA
05aad38ab1af316d73b37e68cc8f10e0	predicted_permease
05ab54f4bfc823cc5b4e0120c23c89d5	hypothetical_protein
05ad8cc8c2cbae70feb73dfbe6950bad	ATPase
05af01c44fa473c5b67b8d72310f859e	probable_carbon_monoxide_dehydrogenase_large_chain
05af2b865d6f3cf1c4dc679ea28f96c7	DNA_ligase_I_ATP-dependent_Dnl1
05b0b3a88ea8d728e032ce3b702dd888	hypothetical_protein
05b0c64c80da62e8cef54f60bc174d56	DNA-directed_RNA_polymerase_beta_chain
05b11615223b260f2bf8e80b39ebeaf1	fructose_16-bisphosphatase_II
05b22ea80ff9f54e62c4d40ae4f02e29	methionine_sulfoxide_reductase_A
05b2e6155a011d5eb76e92d6098a24bb	response_regulator_receiver_protein
05b438fd30bc04f2ffb05c083bf4d22f	hypothetical_protein
05b5f580a68d7261e8862e5355a5fd10	multi-sensor_hybrid_histidine_kinase
05b6285d4d7030f22e9ffc0fe2d11c5a	urea_ABC_transporter_permease_protein_UrtC
05b6a27ae43d9146ec337b48ccc5e05a	DNA-directed_RNA_polymerase_subunit_alpha
05b725f1ad49230c3666486f7f107aaa	pyruvate_flavodoxin-ferredoxin_oxidoreductase_domain_protein
05b7407a64a097b809d37aa5567dbbe6	DNA_primase_small_subunit
05b829311e35f3a32dffd171c2e1d4eb	acyl-CoA_ligase_AMP-forming_exosortase_system_type_1_associated
05b9643d0fb43cd79d1e5391518db1a9	LytR-AlgR_family_transcriptional_regulator
05b9be975b23227d1a8caedb7eee2e67	transketolase
05b9dda9c5173449a83bd1e69e7b88c9	ATP-dependent_protease_ATP-binding_subunit_ClpX
05bb5acb0131104af1762e1a666b79b9	VWA_containing_CoxE_family_protein
05bc95dfdc6ef1655ff264280101f0d1	glycine_cleavage_system_aminomethyltransferase_T
05bcbea98604634daa5a4f71ae02abbc	argininosuccinate_lyase
05bcd46b324d2a52bf7317f71efddb37	FAD_linked_oxidase_domain_protein
05be5ea81d76f975a0fbcd91e04f1887	hypothetical_protein
05be9f47d325de3be1eca3b014e45b87	RNA-binding_S1_domain-containing_protein
05bfaa7908ff739b489f9589b53a9284	ornithine_carbamoyltransferase
05c0a5046a088cbcc0965e0fae91b24a	nucleoside-diphosphate-sugar_epimerase
05c0af4870bece0e15e3d4e97697fcb8	putative_maleylacetoacetate_isomerase_MAAI_glutathione_S-_transferase
05c1dfdd5bef187d758b4408cd3a506a	cystathionine_gamma-lyase
05c8892e1dcafb885dc032f243964392	hypothetical_protein
05cb6304c827303789e45b9d459093b7	pectate_lyase_putative_pel3C
05ccf1c62cb2edc8f24e14455de16d21	phosphatidylinositol_alpha-mannosyltransferase
05cdf5bc8e175491b872420acbf62e0a	cell_division_protein_ftsH-like_protein
05d0fdb931855de18aba4a810fbb5fe2	propionyl-CoA_carboxylase
05d181a638abb2bacf94cb2c6025cc98	30S_ribosomal_protein_S1
05d31d34b5a68407e60a42851d69f4e1	hypothetical_protein
05d33f7793b35cb9377e20d448c50b63	glucokinase_ROK_family
05d3d1d9ae3643464935a1f90b3f6186	helicase_c2
05d4359a66325c6104b48ee5f614d880	signal_peptidase_I
05d4af098fea415ea109714566562273	dihydroxy-acid_dehydratase
05d605f7322a92094e31531bd06d96ba	Nitrilase-cyanide_hydratase_and_apolipoprotein_N-_acyltransferase
05d8f0631914f452e74b7a76e3c454fc	L-seryl-tRNAser_selenium_transferase_protein
05da01e13f87ccdf1430bcc209447bd2	CTP_synthase
05da0917d4b9b25aa0c2eee764fc27f7	NADH-Ubiquinone-plastoquinone_complex_I
05da53b540c07bf01f8a0336b89dc0b1	ABC_transporter_polyamine_transport_protein_ATP-binding_protein
05dae96948df8029a3d77d1dc3b67bfc	aldo-keto_reductase
05db595980f472702c2aac96019e5c93	QcrB
05dbe290c0f4ce9cda2b2f208773be20	putative_dual_serine-threonine-protein_kinase-phosphatase
05dee9bdd688b729f947c36bfae7aaa1	dihydroorotase
05e004530b21651deb440910a8957030	FAD-dependent_pyridine_nucleotide-disulphide_oxidoreductase
05e04c4775952aca9b3bd54b423e52ff	enamidase
05e0e241a6918c27147c59501c95d54d	type_I_secretion_system_ATPase_PrtD
05e17fe02c345302938956ef0f8af353	Cysteine_desulfurase
05e1d1dd2756409f9bf77ce1b1c8e9bd	band_7_protein
05e33678383e423359277226c0995166	FAD_dependent_oxidoreductase
05e51ccf19affc7c71c0666683a16b4a	thioredoxin_reductase
05e7abb1b25a3263e37f0f6557afcb26	glycosyltransferase_group_4_family
05e89ada05c8c145b208d085ad7c1b20	NUDIX_hydrolase
05e9ceb13eb5efca5239c30b519c52b5	ABC_transporter_ATP-binding_protein-permease
05ec096a1ce450fb6b426323ad56c7dc	phosphoesterase_PA-phosphatase_related
05ec17ad1f48b9a4c76e9f2d72fbe6f3	ribokinase_family_sugar_kinase
05ee98f1b4ef6c9f665423eb39f4d26d	peptidase_M50
05f12a63eefe3a7df0f4b3b2b9d50a4a	phosphopantetheine_adenylyltransferase
05f1774ba1ea7e7def207d1f32ea2895	excinuclease_ABC_subunit_C
05f2a9e7451661c2d4643ce277b4e189	L-arabinose_isomerase
05f5053119dc5b7cde25f934458f3985	metal_dependent_phosphohydrolase
05f6a4572765e62e72cc4171f0b7240c	luciferase-like_protein
05f714f88421cb10681063de772203ed	copper_resistance_protein_A_precursor
05f775a2c5430ad1367e1ff16c80e6a1	beta-lactamase
05f80901464deaf98c20485c310951f7	nitrate_reductase_catalytic_subunit
05f8663efd67d4de3acbce14b9da9150	HAD_superfamily_ATPase
05f870e7970968c154c81c33d37a0bfb	hypothetical_protein
05f880c466e6230666953811d65d6807	UDP-N-acetylglucosamine--N-acetylmuramyl-_pentapeptide_pyrophosphoryl-undecaprenol_N-_acetylglucosamine_transferase
05f9eecb938b817357a8322821ce3b7f	catalase_Mn-containing
05fb0719f5a46e2e62165236bbf3c392	non-ribosomal_peptide_synthase
05fb7017dd147e17440af266f43b7e64	Orn-DAP-Arg_decarboxylase_2
05fd2544f44bd28bbe0636e76a903908	hypothetical_protein
05fdc38cd46a386422fc574a17e128b8	efflux_transporter_RND_family_MFP_subunit
05fddd2e389cc053c968b9e115492d2d	anaerobic_dehydrogenase
05fde9e54708ad1172b0b4cf99caffdb	Helix-turn-helix_Fis-type_protein
05fe447d8a283786e883edd587051372	hypothetical_protein
06002296394428d00c3ae09c7effb14e	succinyl-CoA_synthetase_subunit_beta
06004704f89ac84a2fea7d9e88d429a4	endopeptidase_Clp
060079007a0fb87870cb0517e0c38ce8	putative_two-component_sensor_histidine_kinase
06022541a9c87c9d63d9deac007cf794	threonine_synthase
0605096fdf254f4768055d7c05aaaabe	ABC_transporter_related
06055da639487cb6d8ac59401f2a662e	4-hydroxyphenylpyruvate_dioxygenase
0606eb0f4ff7f606446c3ed57c722cea	cobalt_chelatase_pCobS_small_subunit
06075fe6af7c14717a97432373bc0a74	hypothetical_protein
06092be4e5d0805b69e4073f915182ed	hypothetical_protein
060956d1656750122de54f6e5a338a30	MarC-family_membrane_protein
060a82760c1c28e41b922a71368b0f40	3-hydroxybutyryl-CoA_dehydrogenase
060abc3604592069ef9580951dc8103c	ribosomal_protein_S1
060aef4b55b1f0004f39a7b9a33ea93d	hypothetical_protein
060b11ebbf6b6b2926a4870f7435f548	hypothetical_protein
060b2fc76cae818c2a5cd3e659460960	hypothetical_protein
060b728b7969a093ebce95febc73b597	hypothetical_protein
060d156792cbdcb596fa92bcf526761e	Abc1_protein
060d29c6eac2d8a7e88408d0c5f94413	argininosuccinate_synthase
06102bd849b1ccc9ca2f473719b93360	GCN5-related_N-acetyltransferase
0611b51aecda0bb1c8a0c89d059e7e6a	cytochrome_c_oxidase_subunit_I
06124345e11966d344e563f5a4207923	1-deoxy-D-xylulose-5-phosphate_synthase
0612cf8dd9acb583fbb5893557d261fa	transcription_termination_factor_Rho
0612da56ac9731ebfffb7174e8532c6d	threonine_dehydrogenase_and_related_Zn-dependent_dehydrogenase
061348c20262f57a34fb95d97d7113b2	pyruvate_dehydrogenase_subunit_E1
06160371a0486129ea313a083f37ac62	phospholipase_d_family_protein
06181fc8e2e21110c63c88fa3f9c722b	RNA_polymerase_sigma-24_subunit_ECF_subfamily
06188d42e537b2641d5a6117c11be256	globin
061a71ba001b7a6f250d46a93fff3751	Demethylmenaquinone_methyltransferase-like_protein
061c051bf865b5b359325f3c86753fbc	inner-membrane_translocator
061e5a00220f343dc8ae851b95d5a7d3	RelA-SpoT_family_protein
061ec6bddf727d04c125188cda4d1252	fumarate_reductase_or_succinate_dehydrogenase_flavoprotein_subunit
0620d29dc6d5c69241486825cba8e7f3	beta-galactosidase
0622279f4b5c8e7507036aaf8e037000	hypothetical_protein
06224eaf6441e5f39939dcee022ad651	glutamine--scyllo-inositol_transaminase
0622d5e81c2e706fcb058629eae9adb7	ECF_subfamily_RNA_polymerase_sigma_factor
062430d4f3b5ba46f4650e2a9e7535b5	2-oxoacid_ferredoxin_oxidoreductase
062451e23e45f82e2836bb9278ec7d1b	xanthine_dehydrogenase_molybdenum_binding_subunit_apoprotein
0624c17cafe481ccebb40014183964be	FAD_linked_oxidase-like_protein
0624e25e5b62c371abc5afe1e12c4343	DNA_polymerase_III_alpha_subunit
0625d0b9dac6495af26fa120ada0d7da	aldehyde_dehydrogenase
062713c86141587d422b6bb9adab0c50	glycogen_debranching_enzyme
06285d6a345951d30a6cecd68f6d1980	cell_envelope-related_transcriptional_attenuator
06288c42031e8db50d728aa2973e7544	dihydrolipoamide_dehydrogenase
062958af8bd13a95fd9834929102fdd6	mercuric_reductase
062bf65decd3cb4e79ea169e6354fc1c	xylulose_kinase
062c591536b9f1ff80f26f2d350f5690	hypothetical_protein
062ca89106703e80474183fc47c3bec8	AAA_ATPase
062dca69263af334130aa8cf3fab4141	phosphoserine_aminotransferase
062e7cf5b1a10714b5086ad1929fea09	non-ribosomal_peptide_synthetase
062eac38b6a737d62206c72f142c8e96	dihydrolipoyllysine-residue_succinyltransferase
063077b9967960b42680555d5e0fd8e5	nitrogen_regulatory_protein_P-II
0630a215f2f4e18e304cb58bdf5117c2	histidyl-tRNA_synthetase
0633d1b75193509ffa80a041c61b0889	hypothetical_protein
0634d63aa8c2af3e04e644cbe99bd5cf	diacylglycerol_kinase_catalytic_region
06358ea270891278b63a65f967ead5f7	HflC_protein
063628b258049fde97a50c46a1374b4f	FHA_domain_containing_protein
06382a6f8f613a6b6e4e23167265bdef	hypothetical_protein
0638fd222cd38deae9acf5b4c0bdae99	putative_4-hydroxybenzoate_decarboxylase
063938ef99450fa04fe73044ab9d518e	glycine_dehydrogenase
063a4ac2734424d4c2419db418c3a106	hypothetical_protein
063d07bd0a095069c3df3738b65bce44	hypothetical_protein
063d12a9778c3f3a54a2e9812e0a6872	gamma-glutamyltranspeptidase_precursor
063f241c15856c17fa6921ab94cef613	glucose-inhibited_division_protein_A
06405f96885916374383b48f6f6caec0	malate_synthase_G
06409828f953bfb05c2ee241be39c364	cell_division_control_protein_6
0642e7cb5b7948f957db301f95d8303c	NADP_oxidoreductase_coenzyme_F420-dependent
06432a505c86eae7f504bdc1d8c644fd	Cytochrome_b-b6_domain_protein
0643d2ab9715f9476c3685874f828cbb	pyrroloquinoline_quinone_biosynthesis_protein_PqqC
064885c2255fb0f67b1c445f698ac6f2	CTP_synthase
0648b5e8fa53aad657c09f61706262e6	ferredoxin
0648ead8f998250da13f408940193460	Histone_deacetylase
064b94f89294e87136aaeb843920e4ae	alpha_amylase_catalytic_region
064bb553ae5e1d827344889e53ab8abb	electron_transport_protein_SCO1-SenC
064cf74f114c3fcf59670730b0216389	glutamate_synthase_large_subunit
064e097b218e9a3d0cd1fe3a0c7bd7f5	RNA_polymerase_factor_sigma-70
064efd4ab46febb10cdaba163ce9dfef	hypothetical_protein
064efe9aba14690a1c0d035ee33ecf3a	carbamoyl-phosphate_synthase_large_subunit
0650020afe8f7b6531495c47a6fac2fa	putative_ABC_transporter_ATP-binding_protein
06507ef7a5003201db90aea9e8b552e2	Beta-glucosidase
06508e2593c10070bad38489c0496b98	1A_family_penicillin-binding_protein
065095ebcdcece87c62cc8d19fd76939	hypothetical_protein
06510ce4a246caa0fb1d19d13ab1d883	thiolase
0651122492b8a9bc1c284b5ccc4c7859	RNA_polymerase
06514afdc1cc3f514c5aae15f01bd5e8	hypothetical_protein
0651e1146282453e6eb014a851d7e946	integrase_catalytic_region
0653a10fd0f0d8fd04b73ee63624a92c	preprotein_translocase_subunit_SecY
065456c8d394ceb577d89502da48bd6d	tRNA-guanine_transglycosylase
0654a72ca5aa27f5a95cb2599795ef58	helicase_RecD-TraA_family
06556b3c1332d00ff84c4a1e329f8907	transcription-repair_coupling_factor
0657100d21811877425d49925f07558c	NADH_dehydrogenase_subunit_L
0657ae1db7bf4f61b77e03696ad8de96	putative_UDP-glucose_4-epimerase
0657c43e4b69dad6b41258e7531525e8	Phytanoyl-CoA_dioxygenase
065abcd8bf42017aea57d933e4986cbd	methylenetetrahydrofolate_dehydrogenase_NADP
065b4c0ce163b11cdd0fa2eb4baab796	ATP-dependent_DNA_helicase_Ku_domain
065e03ee50517383f12cb2a5bfb9952f	thiamine_biosynthesis_protein_ThiC
065e741dc21b2c72fa83c0f525c13be3	50S_ribosomal_protein_L11
0663709e6eb4a394a8ec04a23fcb412b	hypothetical_protein
0664176cb1afa7cf445d8c734e9746fd	cell_division_protein_ftsa
0665af2071117202db61e4860f2703a4	4-hydroxybenzoate_polyprenyl_transferase
066656157aa491dffcd462f74e8858b4	GTP-binding_protein_HSR1-like_protein
0666f6375c341164d78de8c03febb86f	glycosyl_transferase_family_2
0666f85e757d527c1fc8e155c9ffb7cf	electron_transfer_flavoprotein_subunit_alpha
06680669a2ce5917e5f3dfed6b6ec209	carbohydrate_kinase_YjeF_related_protein
06682beae47dbf8666c4f5ab9e4dbff4	Rieske_2Fe-2S_domain_protein
066876270fedbc20e3b90f3bbe2699ad	translation_elongation_factor_G
066884dbae144e0f6aeb5a76c6d3fa76	M38_family_peptidase
066d069360d0b744aab134d8495b4a54	hypothetical_protein
066edb24726a84e51d9fa5aca2af823c	putative_beta-lactamase
0671399b78394928f5423d17c7043c15	UvrA_family_protein
06746a837a565edafd614d2a4420e3aa	Saccharopine_dehydrogenase
067647c89898f24ec73ca7dc8236f7da	histidine_kinase-response_regulator_hybrid_protein
0677c6d3c498cd7d640059999496007a	hypothetical_protein
0679c0f89960ed9ab199a028f2e9367d	glycine_dehydrogenase
0679c1dc66c725fde4d28f0fbb1321b9	ABC_transporter_ATP-binding_protein
067a3f19b44c7e2c9a03b1198edaca83	polyphosphate_kinase
067b642f89bcc0ad891a8c21e9ba0f93	putative_chemotaxis_response_regulator_CheB_type
067cb1d24ba246d1931ef5d63ae94504	Anion-transporting_ATPase
067dd7e898e1bb764d6f3616b135dee9	inorganic_H_pyrophosphatase
067e2036dfb953e545717cf8c74f1e14	hypothetical_protein
067ef94a3c0d8175feb8ac221ed563e4	Inositol-3-phosphate_synthase
0680c2a1beb9a0dc28668912db2ba04d	glucose-methanol-choline_oxidoreductase
06820f679c469a85907bed67cd450f29	valyl-tRNA_synthetase
0682a3284b72d5f535c9e150ec7f24b4	adenosylhomocysteinase
0682ee9b2de703467991589945f831b9	feruloyl-CoA_synthase
06848e717141524cb423386732c6cc4d	putative_exported_protease
0685ceeabd054bcd7f2749a7426a6b7a	2-nitropropane_dioxygenase
068729bb24e51d700a3ba59907cb1b0c	S-2-hydroxy-acid_oxidase
06872c2b3b0bb04dddf49c0e97c763a9	2-octaprenyl-6-methoxyphenyl_hydroxylase
06881de9c22253052e63afe95e809979	dihydropyrimidine_dehydrogenase
06886a05e43abf8b2a10535096b00529	putative_deoxyribonucleotide_triphosphate_pyrophosphatase
068aef50bd879d38c0cc93b284473c5e	metallophosphoesterase
069095c3c09eea0a59462808ca2ce699	putative_ABC_transporter_permease_protein
06913a001dfc97ae72cd4fc8ef385f30	ATP-dependent_helicase_HrpA
06942cf746725873d0ecc00d24380659	5-formaminoimidazole-4-carboxamide-1-beta-D-_ribofuranosyl_5-monophosphate_synthetase
0694695036d01e7516c2ab9a011788fd	PQQ-dependent_dehydrogenase_methanol-ethanol_family
069574c73998455880085fde2afbf9b9	KaiB_domain_protein
0695dfaaf8d824a99d9d8037bde74ab9	DNA-directed_RNA_polymerase_subunit_beta
06963ffca1bbe2ac79ec6f595c339b1d	histidinol_dehydrogenase
0696730cf5bf4145ce6de2ccc4d35a4e	aminopeptidase_N
06979b4b283e367711ddbcebb705c727	WD-40_repeat_protein
0698eea6bef20774a9cb349f77260fb5	hydro-lyase_Fe-S_type_tartrate-fumarate_subfamily_alpha_subunit
06996ef2486f26c977e5a8fef53cb36e	hypothetical_protein
069a91cb627c985ae4296b36b99ef512	PEP-utilising_enzyme_mobile_region
069abeb2d6ae4633eeaff7757413fd9a	putative_formyl_transferase
069af078da14c6a5cec1e9774342e45e	amidophosphoribosyltransferase
069c2f2d2314dfa54a10ee3da1be8273	GTP-binding_protein
069da5be8467a40dab3f49e4f1350d1a	hypothetical_protein
069e4c6fc6489b936cc8862195cf8464	NiFe_hydrogenase_maturation_protein_HypF
069eb0aaf28318b64924189065ebae14	glycoside_hydrolase_family_43
069eba2128ded398350ca658079cc881	50S_ribosomal_protein_L6
06a3e1f3f2333ffb33ddaca9eccba10a	radical_SAM_domain_protein
06a4d9fc8489d659f12e1f1294afd92b	DNA_mismatch_repair_protein_MutS
06a4f0f228f525af73b973bc8e8c657d	heat_shock_protein_90
06a59d564367dafd0107f87d1502d716	beta-ketoacyl_synthase
06a6bbeca3fce0ab4c4978995a9b7ea7	acetyl-CoA_acetyltransferase
06a71b96e1924b163297c197ff0eeff5	phosphoenolpyruvate_carboxykinase_gtp
06a74b6d78ddb7b2516cb4c583d07056	DtxR_family_iron_dependent_repressor
06a826ceb9867987a1878121e6de7d3f	Beta-ketoacyl_synthase
06aa60f5d8e5901bc7e5694812e68f93	alcohol_dehydrogenase_GroES_domain-containing_protein
06aa7815eea5c828b1acb45d1288561f	ATP-dependent_DNA_ligase
06aa826d4cd5af2b5b49d6e77c347791	succinyl-CoA_synthetase_subunit_beta
06adeedc163b9b8ab84366b7062bc78b	hypothetical_protein
06ae68a769741ff1c54332862c9ff859	fructose-bisphosphate_aldolase
06aeb7bc06392e42afc0bf8bfd1f9912	group_1_glycosyl_transferase
06b0bbd7f605912ed53ab1a75f4865aa	short_chain_dehydrogenase
06b1744a6148665ee5b71c4e16c35147	sarcosine_oxidase_beta_subunit_family_protein
06b336c2f3b97537359de08ea73cb3a6	hypothetical_protein
06b356c2ef8f1effaa6033c89c7c5a72	putative_transposase
06b35899f25b9f8874e3fc84f75f363f	NAD_synthetase
06b458a2f5d49a716fc0876ca79ec810	acyl-CoA_synthetase-AMP-acid_ligase
06b547a744a29d627c267c753e5331c9	hypothetical_protein
06b8ad76539c49b46c7901ec153c9c53	phosphoesterase
06b95f04e09a493b0a8dc4c085639b5d	acetyl-CoA_acetyltransferase
06ba85939ffc016947aa41617b141fd4	ECF_subfamily_RNA_polymerase_sigma-24_subunit
06baf6b1b31e530ef5f2a5b806ae837f	methyltransferase
06bb8000475f96f1f5c8791b1525beec	hypothetical_protein
06bccac80b2079e18c994f32ad5f52ea	hypothetical_protein
06bd93eb31f9cbedc17a959047d08cb1	hypothetical_protein
06bdb53fb32639eee1470e9ac2e5fd2c	short-chain_dehydrogenase-reductase_SDR
06c12a9554fb5fc36651a9bed2f53c72	LuxR_response_regulator_receiver
06c250f93d9571d5180147cce891b582	thiamine_monophosphate_kinase
06c2e11611680dd8c73acfdd8ec62c34	TrkA-N_domain-containing_protein
06c32ca8fed23b9364d039a47d4c69a5	exopolyphosphatase-related_protein
06c3cd42b27c1438f39ffd182316916b	high-affinity_leucine-isoleucine-valine_transport_system_periplasmic_binding_protein
06c3fb991d0c548a3d609aef02d8f9ea	TIM-barrel_protein_nifR3_family
06c59bdc1070bf004f8b9273f7ec5742	Microsomal_epoxide_hydrolase
06cb2d8bbc0beec033234904c5b00dbe	putative_alpha-isopropylmalate-homocitrate_synthase_family_transferase
06cb3568d19bd15e65bf44d29f2dd133	superoxide_dismutase_iron-manganese_cofactor
06ccc1780b6ee79642206f8c404be2b9	major_facilitator_transporter
06ccd1600780ba391c46d3332129ef3d	BldD_regulator_of_morphogenesis_and_anitbiotic_production
06cdf42a549ad483f78a3e30d2db0669	K_potassium_transporter
06cec31d57c89fb4188a5d6938f46ff4	dehydrogenase_catalytic_domain-containing_protein
06cf0af0f231f8152423422bce5cb106	putative_two-component_system_sensor_kinase
06d18dc1db9932aeae79561ea782c9a2	homogentisate_12-dioxygenase
06d18fcb99c6728bc4fddffeabc8f7f1	ABC_transporter_related
06d2c2118fb998c7ef0e6774c84da4ac	S-hydroxymethylglutathione_dehydrogenase-class_III_alcohol_dehydrogenase
06d4a50c106344ced79475d0fe29d2d0	amino_acid-polyamine-organocation_superfamily_protein
06d5248abef9dc1ca3317469b0ef7fd4	transglycosylase
06d5564c4659f2791ba4edf626894533	membrane-bound_proton-translocating_pyrophosphatase
06d992f0beae095c4cafea0801aa7ab0	ABC-1_domain_protein
06db15a366d5c81cb758f73cd20ef972	cation_diffusion_facilitator_family_transporter
06db50f57729eb18c42d0a96b62b3d01	alpha-L-arabinofuranosidase_domain_protein
06dc74b7a1922b3687a5e2f471a36def	integral_membrane_sensor_signal_transduction_histidine_kinase
06dca6a803a6797d3599fbf8d568f2b1	hypothetical_protein
06dd392a3273badd4d9b2fc9c371cc10	fmu_domain-containing_protein
06ddcb001be4b9b2eb4513bc743d309c	DNA-directed_RNA_polymerase_beta_subunit
06df1a32195a44f30cfc9bb4e47af1c3	MCP_methyltransferase_CheR-type
06df454f8ca543753013fb73dd34bfd2	ATP-dependent_protease_ATP-binding_subunit_ClpX
06df986994454612c4a8987685171f06	DNA_primase
06dfb8ef75a4cd7ed49439fc00e1d8ff	extracellular_solute-binding_protein_family_1
06e00fe7bf3fc0ee163e619ea86b3994	putative_5-methyltetrahydrofolate--homocystein_methyltransferase
06e137896b154da0dd1a0d4926fbb37d	Dihydroorotase_homodimeric_type
06e202ced44e87ac6180c25c51c51bf0	RNA_polymerase_sigma_factor_RpoD
06e3cc3103e4f3e064b31cfb24801e49	two-component_system_response_regulator
06e414f541f4940b74f25d6a0b93406e	aconitate_hydratase
06e41f5dd08981ad513ec4231067f9f9	ISSpo3_transposase
06e880ec60fea10dacbe297a6a6c5dbb	prolyl_oligopeptidase
06e8ec79d825b73f5baed7e6f7f39bea	Enoyl-acyl-carrier-protein_reductase_NADH
06e903aebf87247eecc4fba67938de0f	excinuclease_ABC_subunit_B
06ea3545365a51c11dc9aece602cbade	TetR_family_transcriptional_regulator
06ea5ca4862ae2c4fd3658ba950ad36b	acetyl-CoA_carboxylase_biotin_carboxylase
06eaed15ce45863b4bbef8b5340e365a	hypothetical_protein
06eba175f2c57123c708c6860c868e77	Exoribonuclease_II
06ec1e301601e752d438a2218568c6a0	branched-chain_amino_acid_aminotransferase
06ec3aa27c08861afd3381ea988e814e	major_facilitator_superfamily_mfs_1
06edead4af065b8f0b54bef007219b55	23S_rRNA_methylase
06eec8646252517e14f95737af3f6191	ABC_transporter_ATP-binding_protein
06f1d764c4e65f388e2da0f9d8d24358	methionine_aminopeptidase_type_I
06f245972dfeca12d36d377174526717	D-alanine--D-alanine_ligase
06f2ea7a1e5570434be41b7581d8887c	acyl-CoA_dehydrogenase_domain-containing_protein
06f46b3ef518a9a337da270ed567a1b9	hypothetical_protein
06f5c6362606eb0a82626a84b70a8b2e	NAD-dependent_epimerase-dehydratase
06f6057b963b18d77abef58cf27c9519	two-component_response_regulator
06f723cf54a0422614f14b612af47c5f	oxidoreductase
06f76de2dd6b0848947edcd8885370c8	putative_long-chain-fatty-acid--CoA_ligase
06f9a56191151ee749bc081e36eba550	formate_dehydrogenase_iron-sulfur_subunit
06fa1670dfdd531294b0f385c4854586	hypothetical_protein
06fb4521d7f145feed25bd457838966c	naphthoate_synthase
06fcc25cd6ea78683b20d71202663b41	alanyl_dipeptidyl_peptidase
06fd0ea3fb80374e0c8317b71022857c	aspartyl-tRNA_synthetase
06fd455f0e4b02fe2dc512963d149e21	3-oxoacid_CoA-transferase_subunit_A
06ffaec1ba6877f339d0a2acd282b9de	Transketolase_central_region
0700653928ed7815220682fc76205ffb	phospholipid-glycerol_acyltransferase
070254af226ecc9a5536325840b34924	5-methyltetrahydrofolate--homocysteine_methyltransferase
070343ffc66f0e91faab46e41c91374b	nitroreductase
07041e053e37d3934da26a68cc35959b	NADH_dehydrogenase_quinone
0706b86769512dbba2e625eeffe143de	putative_nucleoside_transporter
0706c67477e8c75f438be3bc4a136c09	drug_resistance_transporter_EmrB-QacA_subfamily
07075fe837c8a2910ee19b0d66635609	potassium-transporting_ATPase_subunit_B
0707c1ac11303222f775b6e157e0826f	PII_uridylyl-transferase
07085366759ac69a6ac70e4725da80f3	Indole-3-glycerol-phosphate_synthase
0709e209d35ad60cf5aac197100a6d28	ATP_synthase_F1_alpha_subunit
070a8b364ac6f65a1127f6690d52da66	betaine-aldehyde_dehydrogenase
070b9fea24392d96453945a70f56b983	hypothetical_protein
070bdb44c9d6aab647559433792da19c	3-hydroxybutyrate_dehydrogenase
070bed4788d183d6d13a028a63bf8a8e	hypothetical_protein
070c9db23f0b3dc1fa0b1a196ec56531	hypothetical_protein
070ca54a7e10bb0b8f4089059f545c9c	mycothiol-dependent_formaldehyde_dehydrogenase
070d278fe1532e563f4f92ee8d17ed13	transketolase_central_region
070d99fe41547f347e8aad060676a42b	TonB-dependent_receptor
070f336e055dbcff69f950e945b86eb9	putative_DNA_topoisomerase_I
07108aad8ebc98d030c506caf600e684	hypothetical_protein
071095befdba1fe236ba77f7a86dcfba	hypothetical_protein
0710a290d7b9606526d9ad5502b11806	biopolymer_transport_protein_ExbD-TolR
0711215241839e171438b938890aa715	short-chain_dehydrogenase-reductase_SDR
07120a9e45e4d080d8a0c853392ab6db	putative_hydroxypyruvate_isomerase_protein
07120b77fc7bbafeaa88d3ad6c652de2	cytochrome_c_oxidase_assembly_protein_CtaG-Cox11
07121cb919f492694dfcb515e66f61cb	hypothetical_protein
071271b99250c6f92d3b025aa515ce66	xylulokinase
0713baddf5939a04f369fd6687af063a	ABC_transporter-related_protein
0715a72bad69c6268480b628938f0941	spfh_domain-band_7_family_protein
0715df40cbd2db8fb66b34f6a45c9155	iron-regulated_ABC_transporter_membrane_component_sufb
0718cd0fcae011ca8d4e1bd5cf290160	conserved_hypothetical_protein
071958c6ada42555efd9f256af5272ee	formate_dehydrogenase_alpha_subunit
071fb645b8e293d4d6755eb900c40374	NusA_antitermination_factor
07200b0fecf1270aa8e997d1f2ad8d5d	dipeptidyl_peptidase_iv_precursor_protein
0726f8bf2f6e4fe8b050df15acf48a7c	FAD-dependent_pyridine_nucleotide-disulfide_oxidoreductase
072734b39871bcd1974357a93eeec6d4	hypothetical_protein
0727461f6d83f49bd6e78940aa1bb2bf	beta-glucosidase_protein
072930a731a45705109ff31de5d53a84	putative_O-succinylbenzoate-CoA_ligase
07297089fe9d67e1473501cb489d770b	xanthine_dehydrogenase_molybdenum_binding_subunit_apoprotein
072b43f52eb3cd9dc9aa977e845740ce	chaperonin_GroEL
072b4e1d25096c186d0f9e7bd2149584	hypothetical_protein
072ba43583b8f6c1a46920970277aaf4	hypothetical_protein
072c1dc2fe784ded9807abc60be84d2c	polar_amino_acid_ABC_transporter_inner_membrane_subunit
072cd9cfc630054852896701018697bf	cyclase_SCIF309c
072d256f03b415e4a0e8678dbfe9e662	carbonate_dehydratase
072e885bec9b6a0c6eb6bb7486a60cfa	hypothetical_protein
073252eb53edb0cec6432d8f3e6af925	putative_CheW_protein
07341b8e4660da99149c5c79be655370	transcriptional_regulator_Cro-CI_family_protein
0737ff716030b9687adbc402d6923573	hypothetical_protein
07393839f1fd5c4d46b2abb7618cfa0f	5-oxoprolinase_ATP-hydrolyzing
073c0dcd3c8858fb806bd3173dab3a27	fumarylacetoacetase
073f3bfc2cd51e972fa09412c8c0df24	beta_alanine--pyruvate_transaminase
073fd7db75d0f4da5ce4439e7a5f85fd	oxidoreductase_domain_protein
0745456b9515dd37f1e6046edd12dcc4	antibiotic_biosynthesis_monooxygenase
07455b44a944a3ac3c2fb94b9300c2be	alpha-xylosidase_YicI
0745b1b6892cf3028e73e48a8bc5bb97	propionyl-CoA_carboxylase
0746e239cbb1bd174afc8953f56620ce	BNR_repeat-containing_glycosyl_hydrolase
07473270a0ec32f7d94a5e991a91b02e	carbamoyl-phosphate_synthase_large_subunit
0748a6652a100fbff7d9fde2154b4cac	bifunctional_aspartokinase-homoserine_dehydrogenaseIaki-hdi_protein
074c0e0293c98d494898282262a77250	nucleotide_sugar_dehydrogenase
07501108721b232f48b1f6bebc2b32e2	carboxyl-terminal_protease
0750870fa0994581aefd049e54ede364	phosphoribosylamine--glycine_ligase
075132bff1678e33cd07e30a669ed77d	5-aminolevulinate_synthase
0751e688a00e058a071b53187cf28a87	translation_elongation_factor_G
07538fdaf30e46c80b25bdad930b777b	fumarate_hydratase_class_II
07550ffbf1411bc11f316fb7d5020456	cyanophycin_synthetase
075545fbb547e2082b99bdb082919a44	adenylosuccinate_lyase
0756f121d559e1f5a1537c607e8bd41e	two-component_system_response_regulator
0757dd92e50250bee59a728432514d31	TRAP-Type_C4-dicarboxylate_transport_system_binding_periplasmic_protein_DctP_subunit
0758fb93d7a500401ca195ee08e64e40	nodulation_protein_N
075abeb6d17001a0c050366a46c30b54	aldehyde_oxidase_and_xanthine_dehydrogenase_molybdopterin_binding
075b6aec24512b3de95404ea5ada73e3	multi-sensor_hybrid_histidine_kinase
075c90b20c4c3b104d455a8057226515	succinate_dehydrogenase_iron-sulfur_subunit
075ca29ecdd51ef0094b9755f16d4166	UvrABC_system_protein_B
07618e62340391e873842faa27f920d3	putative_branched-chain_alpha_keto_acid_dehydrogenase_E1_beta_subunit
0761c748ee0b147b4aa34c78106844e5	spermidine-putrescine_ABC_transporter_ATP-binding_subunit
0762b5fa275412a2c5409cafee9cf9c1	beta-ketoacyl_synthase
0762f750927a07ac2f9badd35597d6f0	adenylosuccinate_synthetase
076368b95b0efa65f9826a8991a0d810	hypothetical_protein
0763c9649ef42983202231f03d8ecda0	dihydrolipoyl_dehydrogenase
07644715fb9c5e275a5ae91a2bfae99c	putative_penicillin-binding_protein_1A
07647208ce751df91bfe141a230d0cc3	hypothetical_protein
0765746a07046278efd7cad9e419d24a	transketolase
076623215d06e3a7aa9637cd13dd2714	prolyl-tRNA_synthetase
0766260a43e8d372d807bdfd5a0c8e0a	putative_hydrolase
07682eb2c1cba4809a5338ab82877774	urocanate_hydratase
076978093c8e8d4d138877b357e2bf70	LuxR_family_two_component_transcriptional_regulator
076ad1c74df5458b994f8bc4a6c55471	transposase_IS116-IS110-IS902
076d1408f78fe74cd32c7dbf224a4af0	ABC_transporter_related
076d8dee2728adc72b0ea75cdb634995	hypothetical_protein
076f69aec29e4f9a429534ba26b17d67	ABC-type_branched-chain_amino_acid_transport_system_permease_component
0771c146b45558c8b987acadb0572e9f	NADH_dehydrogenase
07722be279dedd5aa8a16b6c2176a635	amino_acid_transporter
0773a9428470d659cdd2ef38bd92c23a	N6-adenine-specific_DNA_methylase
0773ae39516514fc3f2f9e2b78b78701	2-oxoglutarate_dehydrogenase_E2_subunit_dihydrolipoamide_succinyltransferase
0773e5a3d871c6f1612a1fd037453c9c	transcriptional_regulator_LacI_family
0773f631f28e796e6c41412037111a2e	hydroxymethylpyrimidine_transporter_CytX
0776b9c837133a0a92974b980e958d9e	hypothetical_protein
07783ad776fed0a7ddb10687a2730269	radical_SAM_family_protein
077a3b09dcc91f76fce434750b12c272	FAD_linked_oxidase-like
077bb873c4116250957d7a28ec43e6c7	isocitrate_dehydrogenase
077c1f5133800ccb8988a117ecef6e00	ATP_dependent_DNA_ligase
077e495493fb5c89ead3809d19369f90	putative_ABC_transporter_ATP-binding_protein
0782af175bb225f1aaf2fbc061512740	preprotein_translocase_SecA_subunit
0784213f0edfdcf69581118a3d16961e	selenium-binding_protein
0789d9b33a8a3ff7f6cffc24e59f83d1	hypothetical_protein
0789f351e61557c2204ce62fa1e55af3	60_kDa_inner_membrane_insertion_protein
078a98144fd3a4c0edd0add01b986f5a	GCN5-related_N-acetyltransferase
078b03dfa7066667207bcb8a047716c1	hypothetical_protein
078b47f25f190cc2ec10e256ec571595	hypothetical_protein
078b7376986901a9e1a01cbea3755633	Glucuronate_isomerase
078bb29b8fb5380ab5dd75e46fcea8a3	AMP-dependent_synthetase_and_ligase
078c45f28d38475693d627dc62c62634	ribonuclease_Rne-Rng_family
078c842e9702ead475d0014f9c56f772	phosphogluconate_dehydrogenase_decarboxylating
078ca8c4b6dc9a6350127593e80f3ad7	phosphate_transporter
078e5650fcc21e8edda31bea49e055e8	hypothetical_protein
078ff6eb542771b280589be484f90f29	formate_dehydrogenase_subunit_alpha
07900451e58409a1dec23ca5dc95422a	methylmalonate-semialdehyde_dehydrogenase
0792725a556ced113504a73a6ab665ae	putative_anti-sigma_regulatory_factor_serine-threonine_protein_kinase
0792927dbc93c77d5856f71aacb2cf12	lipolytic_enzyme_G-D-S-L
0792fe9b62511f5a22ff977f5575c6d8	hypothetical_protein
07931ed0d90f171df83eb4e5984d9309	putative_trehalose_synthase_maltose_alpha-D-glucosyltransferasetreS-like
0795dd329273763c2e0747464c1c0af4	Sulfite_reductase_ferredoxin
0797ca4edaa01542736ddbf12fb51a0f	Nitrogen_regulation_protein_NtrY
0797efe363472fd6ffa9a6606f176e15	alkanal_monooxygenase-like_protein
07989960ac1df2dc44859d89111563d0	alpha_amylase_catalytic_region
079b843f2437bc244f7415c343f42058	signal_peptidase_I
079c8c48e0ef5021773b58bca135cde8	aspartate-semialdehyde_dehydrogenase
079ce860d49c8a9e489ef3738d495812	branched-chain_amino_acid_ABC_transporter_ATP-binding_protein
079df080a3aa3d1c1c220055739a8f47	Alcohol_dehydrogenase_GroES_domain_protein
079f61afde3e7c9f2e3dd2c8872a55be	butyryl-CoA_dehydrogenase
07a100ed3364e234cfd9e8e440dd956b	aconitate_hydratase_1
07a17936b3fbaa9035c7d96a5b858d7f	putative_short-chain_dehydrogenases-reductases_SDR_family_protein
07a23505fd0bc92daacefab81b99f83c	FeII_trafficking_protein_YggX
07a3a1e44c213fa3652d4993d1ebeea8	hypothetical_protein
07a415308985c769fd68560fdb274804	bifunctional_deaminase-reductase_domain_protein
07a4f12383a77530f7614d7fdcaeb501	molybdopterin_oxidoreductase
07a508bb2b58c1f03bc670213c1f3722	CBS_domain_containing_membrane_protein
07a5f99748dd21ffd6997b2db6af185a	integrase_family_protein
07a68df7d9d9ad640fcb3691ba800766	enoyl-CoA_hydratase
07a6f306c149421667637b4d8c54234f	protein-export_membrane_protein_SecD
07a71a09e6acbd0cddf46c9185c7bba1	phosphoenolpyruvate--protein_phosphotransferase
07a90c5cbe42b360172c2b15701feb5e	protein_of_unknown_function_DUF72
07ac1d85eadc7f7b7f6d5ea025a11947	NADP_transhydrogenase_subunit_alpha
07b07aa4abdbe2e4ff82101ef8c89d18	acetyl-CoA_carboxylase_carboxyl_transferase_beta_subunit
07b0fc42dbcb9f2610c73c688cfc3fa5	ABC_transporter_substrate-binding_protein
07b1288be52f12d3abe4aa0a1e4e3af5	amino_acid_permease-associated_region
07b3301c09242212c10f9a87e45f9df6	putative_substrate-binding_component_of_ABC_transporter
07b41427c8272d9b28c9391327fcc24b	thiamine_pyrophosphate_enzyme_domain_protein_TPP-binding
07b62506c9b03c741d817411586b3d80	ABC_transporter_related
07b75896f06ea930c35ed90043aea824	tryptophan_synthase_subunit_beta
07b8d93ef34009b4d222b1a946926a56	putative_sarcosine_oxidase_alpha_subunit_transmembrane_protein
07ba1c29cb2c80fcfd263a71c22e7fc3	glycoside_hydrolase_family_57
07bc4693eac5f7bb78c1c5c0e258bbc9	protein_of_unknown_function_DUF354
07bd4a0036aca73af3964cf8eaf12988	protein_of_unknown_function_DUF853_NPT_hydrolase_putative
07bd5895ab6b86efebb460fdfcd5c201	aldehyde_dehydrogenase
07be6b2e3f61c6677599983230230510	Flavin-containing_monooxygenase-like_protein
07bf090eb83e60b9b63cd5f52329a9f8	SpoVR_family_protein
07c1bc482c65bd0b7d8f4ead8d627886	hydroxymethylbutenyl_pyrophosphate_reductase
07c1cc406bbf339def3805b1750db7ff	host_factor_Hfq
07c43f729a1d10d77be8ae42d7dde4d3	ATP-dependent_protease_ATP-binding_subunit_HslU
07c554e20e9c65f00de4aada436e6988	ATP-dependent_DNA_helicase_RecQ
07c6b417c8b8a14333ce07e79b9fd5eb	OmpA-MotB_domain_protein
07c761eec8d11a8edfeb62906f33ef0e	chromosome_partitioning_ATPase
07c955824e54c789b69e5a7729a4c774	excinuclease_ABC_subunit_B
07c99f972a87d47318e19e237a81bbd2	putative_FAD-monooxygenase
07cc1cac8daf2ac9a4301af8545cd48c	ATP-dependent_metalloprotease_FtsH
07cd1416756a9a502cae87f448b18f66	cbb3-type_cytochrome_c_oxidase_subunit_I
07cda41185d364c6857997ea975b7c96	hypothetical_protein
07d00e7e99772a0d50001015075e50dd	putative_amino_acid_transporter
07d02a5b37386f3d3aa586c891235156	hypothetical_protein
07d0e7ca6d2400ec01a07787e555ab7e	ABC_transporter-like_protein
07d1f6d1758ec63354432bda56489363	UDP-N-acetylmuramoylalanine--D-glutamate_ligase
07d91c6dc72174ab570172013cdf0015	5-oxoprolinase_ATP-hydrolyzing
07d9f2e2a7248e4063d23b91223304ca	ribonucleotide-diphosphate_reductase_alpha_subunit
07d9f5e5a3701c0d64f351519127b40c	putative_two_component_regulator_sensor_histidine_kinase_transmembrane_transcriptional_regulator
07da1533d66e78792250a4fe1459256c	proline-specific_peptidase
07dad02805aa22bcf74ad6102105a320	ATP-dependent_protease_ATP-binding_subunit_ClpX
07dd346397e6c2183fce45a82d954135	Activator_of_Hsp90_ATPase_1_family_protein
07de0d97ec29fa46c3ea5918490ab4d7	AMP-dependent_synthetase_and_ligase
07de3c64bbca6654eb6ec5148c0b2d6d	Heat_shock_protein_Hsp90
07e087c203c53a36af5c0c62d89f27b3	ABC-type_transport_system
07e0ac554b9a7e9bc60f111b438ea249	putative_branched-chain_amino_acid_ABC_transporter_substrate-binding_protein
07e302f950d3be91574ce89dad7dd1bf	ABC_transporter-like_protein
07e3a8c88fc084b2c1752f387ef6bdb6	putative_acyl-CoA_dehydrogenase
07e3e2e40dcf3021e9ebd31f7db3a5d1	hypothetical_protein
07e595ca3f44da0465d8b9a484027215	phosphoribosylaminoimidazole-succinocarboxamide_synthase
07e6b93d5e79348ecf2944e614209bff	drug_resistance_transporter_emrb-qaca_subfamily
07e6e02b53c882d13532113374f8bf7e	MMPL_domain_protein
07e7dfe25a46ce4d6c2177a6364cdc52	excinuclease_ABC_A_subunit
07e8ac3c86228fb8ed84f5398909252a	peptidase_S45_penicillin_amidase
07e937242a7100ec9911280b0e1a1aee	hypothetical_protein
07e9bd254efc30a61d65b580618a854d	protein-glutamine-N5_methyltransferase_release_factor-specific
07eae50c571c4cf1ba51d7a5e059c402	hypothetical_protein
07eaeee42606e4a5a0482b863b8a3c4f	protein_serine-threonine_phosphatase
07eb2c268d735390c9929fc36a4f8adb	succinate_dehydrogenase_and_fumarate_reductase_iron-sulfur_protein
07ed6c87a45ef55bf2ae19884400ee14	major_facilitator_transporter
07ee238efd5b2d1b32fc50c12e7a57dd	Oligopeptidase_B
07eeae2b6ca6ecbc0861cb4b130b2339	prolyl_oligopeptidase
07efa928d3428002af3e14d4373c8718	UDP-N-acetylmuramate--L-alanine_ligase
07f01f3fbc05628af5cf229951b02006	transcription_elongation_factor_NusA
07f241a5fc2a6d2ececba73f06e86995	hypothetical_protein
07f34c1e2267417d088357a7af57dc67	ABC_transporter_related_protein
07f384851f512a92489c173e3d66d63f	type_II_secretion_system_protein_E
07f574afabf6fc3c4f176be170672ce7	alcohol_dehydrogenase_GroES_domain-containing_protein
07f66b07e44d615f825ca1d0dfc87df7	preprotein_translocase_subunit_SecY
07f708e761def30764b0444287b46058	quinolinate_synthetase
07f8d3a0211b0f5884315243537d62c7	arginase-agmatinase-formiminoglutamase
07fa9d9f504acb89afbf1e9e60f78179	hypothetical_protein
07fb611953e5a355dad1c04c1387d0b0	peptidase_M15D_vanX_D-ala-D-ala_dipeptidase
07fc89072d2657a764a9b6b0182da3b1	aconitate_hydratase
07fd949ad17c0a21bf2d212cfd560597	hypothetical_protein
07fe8514379b933629dc12af254b176f	malto-oligosyltrehalose_synthase
07ff7ff796058d5acde868c66845ef08	AMP-binding_domain_protein
0800ed804a0a8258848f522b8a81c34f	coproporphyrinogen_III_oxidase
0802c0a3998b7352cbb6edf399bef377	ATP_binding_protein
0802f1193146716dcaac2af95755af47	alpha-glucan_phosphorylase
08030a114e85164a2bde458ffe0acecc	endopeptidase_Clp_ATP-binding_chain_B_clpB
08037afa24d152a95fdd2dfc41e594a9	arsenite_S-adenosylmethyltransferase
0804d70200db4ba01490deb78dd8be52	protease-like_protein
080523cad61a7b88c1ca8b8cbddc2d57	hypothetical_protein
080585bda3dab6662a500d998ba3b164	peptide_ABC_transporter_permease
0806b9d836b3e5cf099a390080abca94	putative_membrane_associated_hydrolase
0807dd508b6485b96a5f76c5e86f66b9	amidohydrolase
080aef523cdff4316008089c2541c12b	glycyl-tRNA_synthetase_beta_subunit
080dd81596761673defb75af457c6363	FAD-dependent_pyridine_nucleotide-disulphide_oxidoreductase
080eb496a7baa0cd07654a9e5479b4c0	amino_acid_adenylation_domain-containing_protein
081235bacbbad22d5108d2ddf3b6f6f4	phosphate_acetyltransferase
081308f8e945e40924fae7ea5fc16a6c	iojap-like_protein
08133e1612684b82241784bab9ecef2d	putative_peroxidase
0817207077bad27e9c66137006470850	amino_acid_adenylation_domain-containing_protein
081851cc9e9c4175883c885fd8bbff25	peptide_methionine_sulfoxide_reductase
0818b52bac5bf0e8ac809ec5613986a1	Gp37Gp68_family_protein
081a51759f520e4abeae9f5110b1287c	gluconolactonase_precursor
081e52e6504f8eface020937591ca3b4	peptidase_S16_lon_domain_protein
081e8a2018acaff00718b0067bc31f7c	acyl-CoA_dehydrogenase_domain-containing_protein
081f02c948c9d6252e979c21cb4ae2e6	response_regulator_receiver_domain-containing_protein
081f39f65d2dd04440a954dfb502a185	putative_aminotransferase
081f649675d748f5188e1a6ecbde09eb	Chitinase
08201544fdf89f94814e12c0f0a917fd	transposase
08203b52a5008828528e7b08747990b3	cation_diffusion_facilitator_family_transporter
08204e04c329d0bebbf09126df035d02	2-oxoglutarate_dehydrogenase_E1_component
0820fd107ee1f7568cf97849122d3519	NADPH_quinone_oxidoreductase_PIG3_family
0821a3c85068bafc3add558305932b6b	putative_transposon_transposase
0821f4e756dd587e11148b8f0f9ff10a	putative_penicillin-binding_protein
082344bb3ee5984e95d9981d10220357	hypothetical_protein
082748b77180edb7f7feb141318f3718	hypothetical_protein
0828951e5707e2d9e1a5b87d6417f605	6-phosphofructokinase
082945db92fdeeb82df897c360c9ce43	putative_aldehyde_dehydrogenase
0829c3cf7774bb4be430f6d9029a2ea1	hypothetical_protein
082ac818f65d0af823f91bab305b6d46	integral_membrane_sensor_signal_transduction_histidine_kinase
082aefb7afe6452c3b91326c849fabf3	NusB_antitermination_factor
082b18ba6c91a702546d71843acd554b	isoquinoline_1-oxidoreductase_subunit_beta
082b258df63aa2841dc4bcd5930f8fed	oligopeptide_ABC_transporter_ATP-binding_protein
082d41f5f64dd04f2918357df51350d2	FeS_assembly_protein_SufB
08317a4a0fe6ab3cd312820d20069f5b	molybdopterin_oxidoreductase
08348f3a29a55eb5e5f28dc7c618aaa2	hypothetical_protein
08357f1c494f171546db60ff1e1a1e28	putative_hybrid_histidine_kinase
0835aa570e258c5bf3f4e64b5759de21	FeS_assembly_protein_SufB
0835af168ac60b8eba444a26e8ba6ae9	HAD_family_hydrolase
083655d5e89d11dcae6f3de394c22535	prolyl-tRNA_synthetase
08372dc6d3f0c5e2ec30be12a4f3f886	ribosome-associated_GTPase_EngA
083746b64ee15ef515cae1b98b0e4245	binding-protein-dependent_transport_systems_inner_membrane_component
08383275048473863c8b6298213d845d	ATP-dependent_DNA_helicase_RecG
0838f34b181ed77cc593e33d61c2760c	peptidyl-prolyl_cis-trans_isomerase_cyclophilin_type
08399b1c52d0813ab5caad317f4c0639	29_kDa_antigen_Cfp29
0839fd0b03c677e90db01bfc4e9e2b4f	fg-gap_repeat_protein
083c8b11c7bbde6e1719dd9f5cd65475	adenine_phosphoribosyltransferase
083d25b8ef89546aa4bbd6cb69223e18	aldehyde_dehydrogenase
083d68389db6429262d42d6500e9d9f0	HAD_superfamily_hydrolase
083e2248443565659a098a40215947c0	hypothetical_protein
0841036b324a620dafeeef9f0fd53cc7	hypothetical_protein
08417c141b6ec3b7095a8cba2e9b422d	elongation_factor_G
0841c42cbe17349935d3990bd3b8fedc	acetyl-CoA_acetyltransferase
084259bebb2759c93e0879c687d80827	hypothetical_protein
0846e64badd1820ede86cdc642978dd6	aminopeptidase_P
084ab7ef98d04421be2fa37baa8ca372	beta-lactamase_domain_protein
084be1e63742ba1056caf9f95e1facb7	phosphoribosylamine--glycine_ligase
084c35702582ed1a794ce40c1423e281	Glu-Leu-Phe-Val_dehydrogenase
084c7006d362ce489f892c5c01f59102	acriflavin_resistance_protein
084ed4e7b29e702ee71233028852348f	exosortase_1_system-associated_amidotransferase_1
0852998daa0e2b5ae4be60405a96b637	ABC_transporter_related_protein
0854438b6d530fffcd105f7c898c4ecc	Na-glucose_symporter
0854609a4cae74e1a1ca3ab4752bc36c	Na-solute_symporter
0854b1f9ff2d136fe7e623fb081eb2af	acyl-CoA_dehydrogenase_domain_protein
0855524d839564c0bdd7780186fa1f9d	hypothetical_protein
0859e874e7295d8de4c47fc9a2839f63	hypothetical_protein
085bcda1ea5c805e0f61962020f48900	phosphate_ABC_transporter_inner_membrane_subunit_PstC
085ceb5430e680fae354ea21741dbfcd	NADH_dehydrogenase_I_D_subunit
085fe9e2c16a28aebc8d6a84106cf4f8	galactokinase
0861c37602b59387670d1ef3baf4e2b4	Monosaccharide-transporting_ATPase
08624218d53f841940aee01627412aa5	aminoglycoside_phosphotransferase
086430f208e0d9bbb6f657cc0d690888	Luciferase-like_subgroup
0866b94978017a67d84e75fef03a3c08	DNA_polymerase_III_subunit_epsilon
0868e9e975af57ad715e2b7fc0934e3f	arginine_deiminase
086bc421e4a0b9310952c085a67ddb7c	bifunctional_homocysteine_S-methyltransferase-510-methylenetetrahydrofolate_reductase_protein
086caecf2af3c89e895221080507e1d3	GTP-binding_signal_recognition_particle
086f4022a9d1c5a4c164ba0dc556c0e8	hypothetical_protein
086fc7a662b9ae253cb3e6d789972743	alpha-galactosidase
087125fb3cab85e8b5428ef29702ee51	flagellar_P-ring_protein_FlgI
0871ce6634a2418c89428f25a39ee680	N-methylhydantoinase_ATP-hydrolyzing-5-oxoprolinase_protein
087292b96fbd923e3e11330536bf894f	protease_IV
087526b3a1f5957b93c285b6ad856261	ribosomal_protein_L11_methyltransferase
0875d87f696085fc3cdb7187461f4d89	chromosomal_replication_initiator_protein_dnaa
087622eed3a467e4f3e94ce1d75c4fab	lysyl-tRNA_synthetase
08789933cc2a42aa5b51bd04b09fb720	Response_regulator_receiverTranscriptional_regulatory_protein_C-terminal
087daccf58171630f8010c5475311884	ATP-dependent_DNA_helicase_RecQ
0880a8c886ce1ee4ed4d4a347ef9cbc9	phosphoglucosamine_mutase
088186d9147367f24af70a9d19faee97	signal_transduction_histidine_kinase
0882463436f7e21e201aa57158e86686	putative_asparagine_synthetase_protein
0882be125f23d6df6cde47190227b9d8	acyl-CoA_synthetase
088342f19fc6dc809b64b11237e6a587	two-component_system_response_regulator
0883baf68b82bcd7add73191ae300c6f	ATPase_component_of_ABC-type_sugar_transport_system
0888051a025715ce50a61bdfb9d076a1	Sel1_domain_protein_repeat-containing_protein
088a70eacc6eb04ee1c2b48df907aa33	putative_asparaginase
088a8da2188320a4b80d322ec3d5d5f7	small_heat_shock_protein
088abad0365863b2e8ad25d22ade023f	pyridoxal-dependent_decarboxylase
088b88b3df266778089c2d529b0f164d	inner-membrane_translocator
088c3adc1cbf57c1951c7b1858827454	ribonuclease_Rne-Rng_family
088d785de70f5eaddc0b017a5c2ffaeb	SsrA-binding_protein
088d9487bbc93d66a8dbcd93775a8d13	signal_transduction_protein_containing_a_membrane_domain_an_EAL_and_a_GGDEF_domain
08903ba86fb44484e3df61746b159dc1	phosphopyruvate_hydratase
0891400dbcb436e933c095f33ebe10cf	amine_oxidase
08914d384fdb903c9736dfef4dcf25b0	low_temperature_requirement_protein_A
0891550e8326c3e4169fce811284ecec	diacylglycerol_kinase_catalytic_region
08915c2c6a953d972f934400e680a784	hypothetical_protein
0891bd5fb58e174602e7c5cde7a30af6	PAS_fold_family_protein
089394e4438fd652424e1ca64432238a	3-dehydroquinate_synthase
089587c1146f88e480b5d61ee19b7156	Fe3_ABC_superfamily_ATP_binding_cassette_transporter_membrane_protein
089599deae455ac01bc8767218a3446b	putative_ribonucleoside-diphosphate_reductase
0895b111252b1317e8e7298b7889a4e8	ATP-dependent_helicase_HrpB
0896ee190e8bb4cbaa5a9d12e2073645	membrane-bound_dehydrogenase_domain_protein
0898758b55d01511e3e4164fc3ea7a6a	beta-lactamase_class_C
0898aaa9c037564d91a2b66e4dafc654	glucosamine-fructose-6-phosphate_aminotransferase_isomerizing
0899275b33dafe45b3a19c2bd3358893	short-chain_dehydrogenase-reductase_SDR
0899d5ecfece7a6814a11a04a180e897	type_IV_pilus_assembly_protein_PilC
089a71f6c750360df4b820263938bf06	glycogen_debranching_enzyme_GlgX
089ade19b0f36361bd65cd3fe8fbe20a	hypothetical_protein
089c32606a91bf9a9f62d5be97b7194a	2-oxoisovalerate_dehydrogenase_E2_component_dihydrolipamide_acetyltransferase
089ce03108634c5eea54ed61e24c6d15	flagellar_biosynthesis_pathway_component__flha_protein
089d6782d6f49ad2d6984c624175e185	UBA-THIF-type_NAD-FAD_binding_protein
089ec1d57081ae672655a5aca207d2e4	ribosome_small_subunit-dependent_GTPase_A
089ef8662e50e6bde50a5a5acfbf9c8b	major_facilitator_superfamily_MFS_1
08a0046dfdd4574a2e61659e381361d4	phosphoglucomutase_alpha-D-glucose_phosphate-_specific
08a10656f7b2631877efecef7b805577	hydrogenase_expression-formation_protein_HypD
08a2fb91aba2e2b7190ccdfdb459bdf5	glutamyl-tRNA_synthetase_class_Ic
08a4535710757f8029a90f421f3cc8cf	hypothetical_protein
08a4f9b53675b69413f4ab0e83d5ba56	phosphoenolpyruvate_synthase
08a605cb4ca3dbb5c8d37bb7c9a44f80	valyl-tRNA_synthetase
08a64115c0993a6dc1b8f7a9c11ce305	AMP-dependent_synthetase_and_ligase
08b04191d0b743dc8802727e3c9105c8	putative_methyltransferase
08b1157b293265311029d7b9ca1d7c7d	hydroxymethylbutenyl_pyrophosphate_reductase
08b277e2cc1adae88294d2521dcf4c70	periplasmic_binding_protein
08b2cb64fcad8c71ef9a2055a3816f7f	formate_dehydrogenase_alpha_subunit
08b48212fee68211b008811531c9a000	aspartyl-glutamyl-tRNA_amidotransferase_subunit_B
08b5b3ded395efc00507e10657c8ee4f	hypothetical_protein
08b66789a7d17defccbb9a844e824de1	ABC_transporter-like_protein
08b6a31aef35321f33f790fcef2c1104	putative_two-component_histidine_kinase
08b73ed4e09dd8d6809cd8209cb492a2	oxidoreductase
08b8243c616da2492cc6766ef3986432	putative_acyl-CoA_dehydrogenase
08b875f0f6068234dcc384d16023aa76	RNA_polymerase_ECF-type_sigma_factor
08ba550363ae9fae7e951fd25ca406a8	dehydrogenase
08bbc35b0a5d9511bb0574ab0b445535	TetR_family_transcriptional_regulator
08bc8c6179bf8338cb4845987f5e4482	NAD-dependent_epimerase-dehydratase
08bca7fb40f91e92bcc0525277278e26	glycine_cleavage_system_transcriptional_repressor
08bcbbece8716f3871e095e0759976e6	methionine_synthase_b12-dependent
08be3aa6509a7fb57b8ad48e3c7cb346	SSS_sodium_solute_transporter_superfamily
08bfef616c2fd06c911666029339d59d	microcystin_dependent_protein_MdpB
08c1426425dd2c8133a914c50af56ad4	Radical_SAM_domain_protein
08c187a22dd60deb79eb2cf43d8d8415	undecaprenyl_pyrophosphate_phosphatase
08c2d96ceb4bc91b64e5dd4fbf80e67c	putative_transmembrane_DNA_translocase
08c37f1060f1e0341e267e88c52dc16f	dihydroorotate_oxidase_B_electron_transfer_subunit
08c4238e11cd2282d8fcd930dc049bb9	Prephenate_dehydratase
08c479209204410f66723c7d86d8bd20	AMP-dependent_synthetase_and_ligase
08c5617440a0379502f965b20f6cbc8e	ornithine_aminotransferase
08c74325d3a8676ba4ab614bcbf037c3	DNA_polymerase_III_alpha_subunit
08c90c443792a824d81fc6554c8b37d8	small_GTP-binding_protein
08c90d92751256ce6c861ce263999928	carbamoyl_phosphate_synthase_large_subunit
08c954053415e313ad8cbb844f15a306	hypothetical_protein
08ca3b34935b12e1915db69269052d89	CoA-transferase_family_III_protein
08ca4d862fb37443ede8245e19ca362a	DNA-directed_RNA_polymerase_subunit_beta
08cb3d24b677dfd7662ae240bd0dc89b	ABC_transporter-like_protein
08cc1f8bf5a1118ab6b5b0b74283225b	glycogen_operon_protein_GlgX
08cc30679d0804ac1e8d0572f9d50f61	NADH_or_F420H2_dehydrogenase_subunit_C
08cfc5dfbf2b7315669365c38f371107	putative_ABC-type_multidrug_transport_system_ATPase_component
08d058fe793f04eba03b295a9f4f89a1	putative_PTS_IIA-like_nitrogen-regulatory_protein_PtsN
08d07e8b260f9504e65aace094fb8426	general_substrate_transporter
08d15f63fae2e6f5f5e4d8d160147699	DNA-formamidopyrimidine_glycosylase
08d25cd21cbddc3b6e59d24f9242b229	lipolytic_protein_G-D-S-L_family
08d380e401eaf500be1a00d2f8912023	carbamate_kinase
[truncated: 38,554 more rows]

## Sheet: Intersection soil- tomato
MD5sum ID	Refseq protein
0000873f3ca6ded9a6159989774b509a	thiamine_biosynthesis_protein_ThiC
0000f1248fa2af0022a2e1512220608b	cell_division_protein_FtsA
000366918e73bf1b2ca909b57d684318	polyphosphateamp_phosphotransferase
000a2ed963a7a153e1913e00c33f1695	short-chain_dehydrogenase-reductase_SDR
000fe4acc35e7c9cc243088a8520263e	alginate_biosynthesis_regulatory_protein_AlgR
0010f380167131f4e14f2a9d89ffc21a	Manganese_transport_protein_mntH
00122d9a22f7312df3700833c4847e3c	DNA_polymerase_III_alpha_subunit
00192c5d565e9ec55768cb6fa0a4d86f	amidohydrolase_3
001d331408e2ffa20465029f5a055430	hypothetical_protein
0023fde8c325b80183342d98d3a35c54	hypothetical_protein
00249e002f1f2691f93e0efd9bcae704	UDP-N-acetylenolpyruvoylglucosamine_reductase
0026225e5164eab1eee955ccd3c776dd	tryptophan_synthase_subunit_beta
002c02e0cf5b4ce2df65699688c1c08e	acyl-CoA_dehydrogenase_domain_protein
002d2034ad1918fa1b89d1863c56000d	phenylalanyl-tRNA_synthetase_alpha_subunit
002d3aa1cf297b5ea3d77ee7355e1573	superfamily_II_RNA_helicase
003032953c7e0fffcdc152e81c00adef	hypothetical_protein
003734629a169bd44f74a223130ccec2	ATPase_associated_with_various_cellular_activities_AAA_3
00374db308f08dd9faa08ac7f18176b4	Pas26
003a55528e3e51ee0cfc4de4cb321051	GTP-binding_protein_TypA
003d78eebe66c3bb7c07ba634d9e8479	abc_transporter_related_protein
003e305d217e45119a41e9a860926c35	alkyl_hydroperoxide_reductase-_Thiol_specific_antioxidant-_Mal_allergen
003e4eee046b78d98d2660fb3580209c	Competence_protein-like_protein
004035e12cb007249576d8e8ab4767f0	D-3-phosphoglycerate_dehydrogenase
0040d2adde76cb2c8db3e95f5d4738af	signal_transduction_histidine_kinase_with_CheB_and_CheR_activity
00417cbfc49fac6f8046ad5f8370d024	TldD_protein_putative
0042c77cef5fd68ec47a5e2685c3ec7d	ATPase
00448f0036685e0ee5aa100bad0213d5	6-phosphofructokinase
0045cceb1555a2e579a26239109c892e	Succinylglutamate_desuccinylase-aspartoacylase
0046f78e44d9d75e1f982c9b18fa244a	Seryl-tRNA_synthetase
004995736ad0b1a1c2492fdf672d99ef	DNA_topoisomerase_ATP-hydrolyzing_ParC
004d6f4e8737796cf0ebdf0de3481045	peptidase_M20
004f424ef0561c0f9be8203e95d9eb1a	asparaginyl-tRNA_synthetase
005149389ff1a1864b27105cdb055603	glutamate_synthase_subunit_beta
0056baed05309327ec87f301501d3b15	hypothetical_protein
00599c8a0b73ab850e1801b3841e031d	2-nitropropane_dioxygenase_NPD
005e705ae46e3740ca50c1d089949823	acyl-CoA_dehydrogenase_family_protein
005e7827dcda1e8f47c8f9a443e6753b	acyl-CoA_dehydrogenase_domain_protein
005fc486e5d7b768d0b3bc4fecf8d1ac	imidazolonepropionase
00670ea4f36826e3b12550f67fe52fb6	ATP_synthase_F1_alpha_subunit
00676d0d72a8bba3ecef33ca63f6a64a	hypothetical_protein
00677bdf3892450a6ee750cb247c258c	FAD_dependent_oxidoreductase
0068e0eca16366a59f98461b63425634	ribonucleotide-diphosphate_reductase_subunit_alpha
0069ca2ecb10a694898692e62ccbc22c	dehydrogenase_catalytic_domain-containing_protein
006b100a06390278494f4816fe5dfe2b	peptidase_M16_domain_protein
006c6ae1285ffbd2a4391c32d22a44e4	hypothetical_protein
0075e936a29f2d8a2219761d33ce0421	ferric_enterobactin_receptor
007755f2fd11e8c149bb3516d9ee533e	hypothetical_protein
00779ebc980cafaa2e30cb907d368004	threonine_dehydratase
0078d53eea791cc9b4e1ecb229db86b8	acyl-CoA_dehydrogenase_domain-containing_protein
007a53314b98399c0c7d2ed71ba417f8	elongation_factor_Tu
007bb49c9f165481a504d2800149a654	cytochrome_o_ubiquinol_oxidase_subunit_I
007bbbb3f7d08302f62364b1e7c67206	putative_hydrogenase_protein
007cb312ea9edc0f20050e1d6c124a04	Peptidase_M23
007ced64bd6e51fd56b300dcab9fdee5	hypothetical_protein
007dffdb8bd9a4fc82fbebd96a6be522	LL-diaminopimelate_aminotransferase
007e83adcca770f52d6559b5d27f7aca	4-alpha-glucanotransferase
008004e73074d33a7a668b7f1a07de41	beta-lactamase
0080a3bd47a33bab4f630550cb263d1a	binding-protein-dependent_transport_systems_inner_membrane_component
0082c55a286a319e9191cd57d3d63c62	transcriptional_regulator_DeoR_family
008379ab83dd061e9f82c697c8b33a62	putative_hydrolase_haloacid_dehalogenase-like_family
0083db2a2faed1578a587b7d7d9cc6ce	putative_ABC_transporter_ATP-binding_protein
008403d23ba2323479b5705acc31cd6f	peptidase_S8_and_S53_subtilisin_kexin_sedolisin
0086a2ac915213ce28f91e67116e7c1a	SAF_domain-containing_protein
00881017315c254c5ac443e1da94c252	hypothetical_protein
0088ea492b432ff7f879f50ed764d272	heptosyltransferase_family_protein
008bef2e6415412db5e9d9502ac5e7d5	flagellar_basal_body_L-ring_protein
008c3460b1ead4894c90eb6121bb4ef5	L-fucose_transporter
008f954d6d923385e619cf9adab72d37	esterase
008fd1c5269db727f873bda8fa431e40	major_facilitator_transporter
008fdd7775926c7af7d3581b275a815d	short_chain_dehydrogenase
0090733624e3f1e2bdfec84f19d5822b	hypothetical_protein
009131894c3061784a67acb6bdcaf5b1	TRAP_dicarboxylate_transporter-_DctM_subunit
00924abbac8eabf37a23a75466014688	BirA_bifunctional_protein
009255e4eeb8de94835f583e4ad5b982	glucose-6-phosphate_1-dehydrogenase
009269dddfbf75ac1d9c43d9b845e3e3	exodeoxyribonuclease_VII_large_subunit
0095d29b269a38c7c8b10fecf65bd3a6	glyoxalase-bleomycin_resistance_protein-dioxygenase
009916504558361d63b8bb7078948359	isoleucyl-tRNA_synthetase
009d05102dd652c796483e6578b0853d	glucosamine--fructose-6-phosphate_aminotransferase
009f4e9d54a06a7b5a0d2db2d9544736	isocitrate_dehydrogenase_nadp
009f8161ce847a5673fea3e79d366ae4	insertion_element_protein
00a23b5b11f13b842f2be6012d4c18f7	Pirin_domain_protein
00a4912e1fe639c72e54118995258fe6	ABC_transporter_periplasmic_substrate-binding_protein
00a75061ec88d4e5c0840de47401f5e7	Yop_virulence_translocation_R
00a77d12706429d05bb5c6320ced8bc1	Na-H_antiporter_NhaA
00ac14cc384e94e9d1d3e85d4e6a4304	translation_elongation_factor_G
00ac63c4420b7f3fa1d4287a55bc6738	ribonucleotide-diphosphate_reductase_subunit_beta
00ae845e34d4bc32e32119a7ad4125fa	pyridoxal-dependent_decarboxylase
00b1e9350c17e1720701e31612ab1ed6	formamidopyrimidine-DNA_glycosylase
00b506333f9b5abab8d20343be33f22e	putative_ABC_transporter_ATP-binding_protein
00b599fabf7450a7c8ce8c016b2ebfc8	nitrate_reductase
00b5a7b9211ef99a5664367de532c618	permease_component_of_ABC_type_branched_chain_amino_acid_transPORTER
00b5beadf3a791e5285406150e48442f	superoxide_dismutase
00b5cac76f8550c2e8dc26748f4b5b35	proton-translocating_NADH-quinone_oxidoreductase_chain_L
00b69f4ba17c1b7b995f6b24f1bd0be5	hypothetical_protein
00bcfeb33faca3466872da38ddb3c14d	30S_ribosomal_protein_S2
00c17c909eb97e079165ccef180687f2	putative_inositol_monophosphatase
00c2087dd138dacf7eecd39f48963e05	putative_secreted_protein
00c3701c52e0afca1cd88532b895fe72	sigma-70_region_4_type_2
00c99f3230ea9d0c1198991a4c9da342	methyl-accepting_chemotaxis_protein
00cbaeec9e8b08ed5022b73dedde6cd7	glutamate_synthase_NADPH
00cbeceee5feb5aebb862aebfe0b4f6f	hypothetical_protein
00d36f314cea8364cc7848ed607fd732	ABC-2_type_transporter
00d59a92ea35cb8cb3f8590c42d5a7d8	putative_carbohydrate-purine_kinase
00d79ffbdceb10e1d740aa54110c00c8	aconitate_hydratase
00d7f165d2cfa7d60543634607fbe175	monooxygenase
00d862fd7ed8625bac35427bbb1c9690	Uncharacterized_conserved_protein_UCP028498
00da7c92445dfe4e3e03d8e16d0d0701	type_II_citrate_synthase
00e23d90d52b87e80f57e7baeafca776	malate_dehydrogenase
00e5929f5c0d4fcb8f1aec28d0fb54a9	F0F1_ATP_synthase_subunit_alpha
00e7808e503f12de71c5c48e7595c343	beta-lactamase_domain-containing_protein
00eb00b345df6ad2ee14e3ad567ccaed	NADPH_quinone_oxidoreductase_PIG3_family
00eb05b0fc1a4d0b67cd0b9fdd907f66	hypothetical_protein
00efa3ddab351e01b8a74999963a1091	ABC_transporter_related_protein
00f10cb946214e3f84bc03cbc72dd612	allantoate_amidohydrolase
00f2e5b62ab4feb618b772e9d1bc3716	glutamate--putrescine_ligase
00f556939f91e7c19f36de1bee3bedf6	NADH_dehydrogenase_subunit_G
00f649ec21157ab2274f78cea27c2695	putative_tryptophan_23-dioxygenase
00f74b2c6bd169fdbbe8fe89db50053a	two_component_transcriptional_regulator_winged_helix_family
00f886503c3dcdac06a6fada71c4306d	thiamine_biosynthesis_protein_ThiC
00fe6790a8ae33c50e86e025d41b3e1b	pyridoxamine_5-phosphate_oxidase
0104e4cdf6178c41d590bb130660abe5	indole-3-glycerol-phosphate_synthase
0108541b14989182c364daeca2bb095f	NAD-dependent_epimerase-dehydratase
010eb884530f0a99bdab6e55bb1ae454	hypothetical_protein
0112d0c8284e1da89895a2b074ee9a16	phosphoribosylformylglycinamidine_synthase
01160ccd10e27c9aaf87c4bba39b1a01	malonyl_CoA-acyl_carrier_protein_transacylase
01176c9811c09f41368b19ff7483361a	glycoside_hydrolase_family_65_central_catalytic
0119453c436f2af75484fc1f5da166d5	nitrate_reductase_large_subunit
0119b52209ea3de7ac95b3796eafa75c	dihydrolipoamide_acyltransferase
0124c175c5c0a5a5e28bc96a2fc915c7	peptide_chain_release_factor_3
012a4f4b4c2eacecd85a710e3bcca321	sulfate_adenylyltransferase_small_subunit
0131dc0bf0c7eccc846e7bd354fca2e6	aldehyde_dehydrogenase_2b4
0133ca43f6c878b02d123ca124b4b831	conserved_exported_hypothetical_protein
0134827a33cf2abfaa2402000aafc198	hypothetical_protein
01354721e09777366366fe09f1eb959d	xanthine_dehydrogenase_molybdenum_binding_subunit_apoprotein
014a0971ba46e95b666f9028ed50cf29	phosphogluconate_dehydratase
014b6bd0fbcae2cbf916c82641617388	quaternary_ammonium_compound-resistance_protein
014ea15de17d34d955974b363322c444	FtsK-SpoIIIE_domain-containing_protein
014fd33713519c432c32ebba46f97304	50S_ribosomal_protein_L6
0152348ec6a9b2c312063f4f1c14a83c	hypothetical_protein
015928e4d513f2b4aed841ab60f65e62	dihydrolipoamide_succinyltransferase
015a6bc74baf1802874f77300216c9bd	rifampin_ADP-ribosyl_transferase
015ab4ef7a541b8442145ab5a6a59ac5	alpha_amylase_catalytic_region
015b83791e1f5c957d790e6609b0988f	Amidohydrolase_3
016020083850b2df0e8f669b90e1b1f9	3-oxoacyl-acyl_carrier_protein_synthase_II
0165bfd197783e92bf921695d35c6b33	ATPase_and_permease_components_of_ABC-type_dipeptide-oligopeptide-nickel_transport_system
016bfd7406f82ef98be666548c6cb752	putative_phage_integrase
016e2716bf82df06c1ddb196fe6507d4	transcriptional_regulator-like_protein
016ea94fae2515980d68195c513bf838	4-hydroxy-3-methylbut-2-enyl_diphosphate_reductase
016ebabd46b4e7aa5e4a670259f987af	hypothetical_protein
016fcfaf37a96550345d334c32f254a9	FadD13
0170a46f524a09b2a789eb560778f67c	Cytochrome_b-b6_domain_protein
0171eff75ce515a557f584555cac66a9	glycogen_debranching_enzyme_GlgX
0172c7ddfc819425bcec09cf438ca05d	Redoxin_superfamily
0172f0171764f9611e3a6cbabe13bf95	putative_transglutaminase-like_protein
01740e5916d602b4f8dda4d45f7caf56	RNA_polymerase_ECF-type_sigma_factor
0175a41e1b1fa66c694a33295339703b	short-chain_dehydrogenase-reductase_SDR
017a0f272bea92e97230c6f1e557c605	ATPase
017cc0f3e7f0fd064df26c401d1abdb7	F0F1_ATP_synthase_subunit_alpha
017e23608ad58895021083f5f2d59aee	hypothetical_protein
01803ec7507ebd6948f9d51bd91f3b03	beta-galactosidase
01815688fd19b90d55a185a4949c9de8	binding-protein-dependent_transport_systems_inner_membrane_component
0181a66a511188aed3f9cacb3781264e	zinc_carboxypeptidase
018270e23df24f5c95aef8250284a87f	sugar_phosphate_isomerase-epimerase
018339b0b5f0c8e7a229131cf423ffda	GTP-binding_protein_YchF
018389280110b8fcdd01ca5aebb4090a	heme_exporter_protein_CcmC
018a8e15646c8c5b484991047e1f3d2a	major_facilitator_superfamily_MFS_1
018c0fd5c89c592ed1ef3ec11b0e553c	DNA-directed_RNA_polymerase_beta_subunit
018c432f519cd2755776005180f69afc	OsmC_family_protein
018ed1fe3b417834f94b5340d296a8ab	type_I_restriction-modification_system_M_subunit
018fc1875b51df5fac29cf9ba0efcaf4	peptidyl-tRNA_hydrolase
01928b9fd48464b104892653be3d9dcb	fe-s-cluster_oxidoreductase
01957ca445b8c99454f9b15f8ec1426f	ADP-heptose--LPS_heptosyltransferase_II
019658d2913db2deea0ca75da89ecf6f	Predicted_Zn-dependent_hydrolase
0196c65e7a7e1cea6774e62d06546906	putative_mRNA_3-end_processing_factor
019997ebad6c8058c715c8f702d8af6b	ferredoxin
019ac5a44e88f4f76c0446398283d930	acetyl-CoA_carboxylase_biotin_carboxylase
019b88f2f563a610ab73c9a62ebf5619	RNA_polymerase_sigma-32_factor
019dbd8e6b9ddf6984b2a81ae4dae134	binding-protein-dependent_transport_systems_inner_membrane_component
01a48b6022e321db6fd258ef2016fa58	citrate_synthase_I
01a938845911be6af632d1f61ce098a2	dihydropyrimidinase_a_hyua
01aa259e85ea3506d67b7d983973630c	2-isopropylmalate_synthase
01aba54728f6e721fe1aec43a1cc5a3c	L-carnitine_dehydratase-bile_acid-inducible_protein_F
01abab0d347ac897ca3ea5a888bb3581	lipase
01abad87c9749f11b6256fb847fe3c04	hypothetical_protein
01b769bb0b1bfeed1d9b95281e4871cf	copper-silver-translocating_P-type_ATPase
01b83037887f2a58fb438e513951f848	glutamyl-tRNA_reductase
01b8d55084b6255d7a24d8654f8feaf4	glycoside_hydrolase_family_protein
01ba53159c5512d9294ca001e56f29c2	Htransporting_two-sector_ATPase_C_subunit
01bd9af4fa4ae3fca0028ac1466dc839	putative_NADH-dependent_flavin_oxidoreductase
01c2c2ca80fdd7ff1f7314a17469ffe6	isopropylmalate_isomerase_large_subunit
01d010c0d30debeaaee41f0b3b38010c	hypothetical_protein
01d024ac99f3a3aed895accb7299348e	transketolase_central_region
01d5e9e99ed432fea03497ec5eac9f1c	signal_recognition_particle-docking_protein_FtsY
01d6673e64acf5c3d0eef26f0fa2066d	peptidase_M42_family_protein
01d7a1d5ad3c59de01ea37c5cff158c6	translation_elongation_factor_G
01dabbe47710406c915113a3227e6864	TetR_family_transcriptional_regulator
01dbce471571a55f1dd0cc8c39b569d8	hypothetical_protein
01dea0dd4b88be8ae24490d89a9888f0	nodulation_protein_J
01df3451e37ce358e59586cb7f5e31c7	mandelate_racemase-muconate_lactonizing_protein
01e04c33138c013a0269363fcb11421e	oxidoreductase_short_chain_dehydrogenase-reductase_family
01e21e860c0b8759aa7993d1d60a9891	hypothetical_protein
01e2f4a813a5f1ca5199b349ea362789	putative_phosphate_transport_system_substrate-binding_exported_periplasmic_protein
01e448f11c264c1e9bb31db500b4b483	Putative_Chorismate_binding_domain_protein
01e46040428211494a925b8b5019bd93	xylulokinase
01e78478f44883d2dd41c249cf801846	hydrogenase_expression-formation_protein_HypD
01e7c4a64b7d5273d80f95f6bee06a06	RNA_binding_S1_domain_protein
01e9341c5f497eedc8c14f1e1b381a52	phenylalanyl-tRNA_synthetase_alpha_subunit
01eb6fcd5ea14226ed1a5f3713d85b32	protein_of_unknown_function_UPF0118
01ebcd952aa4d0ab88bc8a4de18fa8dd	cation_diffusion_facilitator_family_transporter
01f1292e0d592123427f5b934e04ea1e	carbamoyl-phosphate_synthase_large_subunit
01f962ea925b91514c937432869c3e0d	hypothetical_protein
020a54afb55dc5ac17dca8b75c8530b0	glucose-methanol-choline_oxidoreductase
020cb2810a9c46a36e92c01a144aa377	methionine_adenosyltransferase
020faeb1ff9c38635ccc85908b72c8e2	aspartate_ammonia-lyase
02134ec404b7aa63d6ee6ae3af44242f	excinuclease_ABC_C_subunit
0213654acaaa10cb483ef26d2d71293a	thiamine_pyrophosphate_binding_domain-containing_protein
0214559b3d7a89e290d1f0e50877ac53	ThiC_protein
02156c3b2f0cc9371d84d48d0bb7c711	transcriptional_regulator_PadR-like_family
021ced0225eedbb4038eb081c16e5df2	oxidoreductase_domain-containing_protein
021cf77f91993b1fe778ef759b7d1291	acetyltransferase_GNAT_family
021d204fb1e036dc06f991aec3d04845	transcription_termination_factor_Rho
021f96520aec30776e897e959e9ad9ed	putative_RNA_methylase
02210fa2a6ce460adb003180f6e70790	WD_repeat-containing_protein
022758d06cbcce95b554e687d2e20251	transposase
022b30cba9179d80dbd92c9ec4af9461	thiamine-phosphate_pyrophosphorylase
022bd6eb396646cb428a9457a0edd4f1	hypothetical_protein
022e42f80338f7f5f720426947d7fa25	FAD-dependent_pyridine_nucleotide-disulphide_oxidoreductase
022f0f1472993032e8f20510ccc128ff	luciferase_family_protein
02358a25d5ea3cce71247f41d49b22b9	Rieske_2Fe-2S_domain_protein
0235c74a7bd39f732044732f628b3924	peptidyl-prolyl_cis-trans_isomerase_cyclophilin_type
023c1a2cab3e11c555f97a1f62be1b18	short-chain_dehydrogenase-reductase_SDR
023c7c7d0f5dd0dc12c92b8bd8515d1a	putative_aldehyde_dehydrogenase
023ff62a5c6790175ab09a9f368ea806	putative_NADH-dependent_dehydrogenase
02461a8b8a17ad481404675968e875af	hypothetical_protein
0247b8ed38956e05fbb45dff6d2fb9ff	Opine_oxidase_subunit_A_pyridine_nucleotide-disulphide_oxidoreductase
024ae6fad6732feb509b1622ec27cef3	chromosomal_replication_initiation_protein
024db1228d3b600474e2d94495388ee6	binding-protein-dependent_transport_systems_inner_membrane_component
024f70e3c84c6bfcc5a8f502f0d73c7a	dihydrodipicolinate_synthase-N-acetylneuraminate_lyase
025194f95e5adae70b67934e64a14898	hypothetical_protein
0251c93e752504d560bd61ca1ab46db7	ABC_transporter_ATP-binding_protein
0255a4381ee66ab55e329b2e5192904f	ribosomal_protein_S12_methylthiotransferase
025626977d5bb1e1d6890f0acb3f23bb	PQQ-dependent_enzyme-like_protein
0256c4e92f3fc1b4226e9adc05de9854	3-oxoacyl-acyl_carrier_protein_synthase_II
0259cb209a241e367950d68f3cab47e4	NADH_dehydrogenase_I_D_subunit
025c9698849afdf1989d67a5fbc2bce8	hypothetical_protein
025d9a153af9cd840a2cd0ae2d580149	proline_iminopeptidase
025e51c50829f0ee0ac940bd945bb21d	WD-40_repeat-containing_protein
025fcb6195e99782b45bac778ea389cd	PhoH_family_protein
026367f6e43db24210756c5602c2f525	D-galactonate_transporter
0263d41bed51e5dde39d34ecbb06d584	bifunctional_isocitrate_dehydrogenase_kinase-phosphatase_protein
0264713ca82cdad21dd47dc5184f15af	activator_of_Hsp90_ATPase_1_family_protein
02653e90c526d028f3d1b4eadfb8fb94	ABC_transporter_related
02664a93a9cc25ebe4840f74332d3c01	D-aminoacylase_domain_protein
02689b0e430d70bcbce8de09fc33bf29	NADH_dehydrogenase_subunit_B
0268a6a406380fcaa4f5d5262e76fbc4	hypothetical_protein
0268dbfa495829eaa410bc388f54a2e2	hypothetical_protein
0269115944190032de71309ffe369174	2-hydroxyhepta-24-diene-17-dioate_isomerase_HpcE
02698d4a79026eace1f96adf4220ff4d	ABC_transporter_substrate-binding_protein
027422b67fd0d0b854bed765bc9153b9	secreted_FAD-binding_protein
0274bf8b999076bc62f697f26438b10a	extracellular_solute-binding_protein
027a12bd612fafee46ef53b22bb4e4bd	3-dehydroquinate_synthase
027b4e56fe5c7d4703d7f58803a5d096	DNA_polymerase_III_delta_subunit
027e0ffd8981e75331ac5e665a1d584b	pyruvate_phosphate_dikinase
0280373eb8d95167a3953f25b2f2d541	oxidoreductase-like
028239d00cee3e946be9b031591cfff8	NADH-quinone_oxidoreductase_H_subunit
0282db9b631cbc49beb8ab4dfbe694b3	ribosomal_protein_L2
02841ddcba3dccf4017cf3d7ed3988ed	exodeoxyribonuclease_III_Xth
028424829a24c883ad3f595e22afe0ed	prophage_LambdaMc01_DNA_methyltransferase
0288c3cf48120587065f940cf5d271f8	DNA_gyrase_subunit_A
0288c4ea17a859891fdb3212d065f89b	pilin_type_IV_putative
02896c8e98696922427f85cab33d502c	RND_family_efflux_transporter_MFP_subunit
028e1291d59db6a39b2b09739576c219	ArsR_family_transcriptional_regulator
028e704db716d6d7836372ce7e95a091	glycogen_phosphorylase
029059569b81cd8bb97665ea48816e22	monooxygenase
02941ee8de44b36a6517d3953dc2dfa1	Lysine_23-aminomutase
0295dfb710445c9666e5d9ddf15bc279	non-specific_serine-threonine_protein_kinase
02973e0e6f1f54bc7a30373ca21ce8b4	Acetoacetate_decarboxylase
0299f801cdfdb53a7110f9dfdc9d32ac	GDSL_family_lipase
029bc1f1a9cfb080c2dbe099fb479900	phosphoenolpyruvate_carboxykinase
029e12fa44a16832f1fa1f64e564fcf9	HrpA-like_helicase_ATP-dependent
02ae1a1a43657f865c9c1f0b2bd80f03	retron-type_reverse_transcriptase
02ae5ab6562ede85ec5df1bcc12a529c	anion-transporting_ATPase
02af1e3918b82044b0305fd0546bc73c	proton-translocating_NADH-quinone_oxidoreductase_chain_M_subfamily
02b5f5776e6392f9c78b943e7a6b7fbb	molecular_chaperone_DnaK
02bd0bc53190f900559135847657a3c3	conserved_hypothetical_protein_Metaxin-like_protein
02c0fa9f5b52418a3b97b7d33e8a4b95	mandelate_racemase-muconate_lactonizing_protein
02c1153c5770294f23750fc197615d5e	ribosome_biogenesis_GTP-binding_protein_YsxC
02c1879115baa6fbdba6941bc279e454	formylmethanofuran--tetrahydromethanopterin_N-formyltransferase
02c388942de69ee29e752e9b900fa76c	NAD_synthetase
02c60175cc970c70ec83e0520eb1835e	conserved_hypothetical_protein
02cd091ae568ff555b4616cd966c3f6f	acetamidase-formamidase
02d0db83e2a86646157ab7e60a679367	amino_acid_adenylation_domain_protein
02d1eb9561808991573181364f595bfc	KaiB_domain-containing_protein
02d5fcb287ac67490feca2dc3ad7ec2a	isoleucyl-tRNA_synthetase
02deb04e8677ec253d14d9e1c6a69089	short-chain_dehydrogenase-reductase_SDR
02df5c4c08857abb08d50ceeef671d06	phosphoesterase
02e031c09598aa7823fed8e13dd58c14	secreted_protein
02e7077f22dc9d3286058ba3cab2911e	ribosome_recycling_factor
02e8765eaa9b5adcebdbcf0790b08df3	phenylalanine_4-monooxygenase
02e8fc6508cd246b18847aa5aa2d2c93	multi-sensor_signal_transduction_histidine_kinase
02e9c5ad85a8f90de0555fb93e1593c8	porphobilinogen_deaminase
02eca8cff8959e4f27aa4b664ecdb824	cobalt_ABC_transporter_inner_membrane_subunit_CbiQ
02ef356afd7933f5045b39af38fb412e	hypothetical_protein
02ef93665e612e1ecb0e7775da21979e	aldehyde_dehydrogenase
02efc738f3eda3f78a0dc6140a3b6950	GTPase_EngC
02f4e02b3f4b1dbd09d0c321d679b628	aminotransferase
02f563c9b0d735725841cd50f37db466	alanyl-tRNA_synthetase
02f6c517b21cf0842d385acd1a66c53f	oligosaccharide_biosynthesis_protein_alg14_like_protein
02fc427816bbe7e5d1f978737c85da35	2-oxoglutarate_ferredoxin_oxidoreductase_subunit_beta
02fe10a4afaeb273818045d51aee3135	formate--tetrahydrofolate_ligase
0300a5e82b688656f67e01b064a4027f	extracellular_solute-binding_protein_family_1_protein
0302bfd878f665c4d1521ded1929beb1	single-stranded-DNA-specific_exonuclease_RecJ
0305b3dc22217d4fe7f517869325aa5c	citrate_synthase_I
030aac72afdf11e3198e7d1f8d229546	CDP-6-deoxy-delta-34-glucoseen_reductase
030fe067b2733e66c0a0a3a99b847c82	putative_oxidoreductase
03101388b0a7e7ca873d0d4babb51923	ethylmalonyl-CoA_mutase
0310928b8559484b8dc223c364b5fe2a	ABC-2_type_transporter
0312ceaa7aa34836ee361c2427646a4e	aspartyl-tRNA_synthetase
03142f43c5670ec11be1eddc6968f710	Pyruvate_kinase
03142fc6ede8b74508e94a996960a421	Cytochrome_c_oxidase_subunit_I
0315cad982ae12d710b550284684dd6d	pyruvate_kinase_II_glucose-stimulated
031c739074aae45d120bdf5d0a08f4a5	peptide_chain_release_factor_1
031d9a872ba3c1f271fe334cb0e3f794	two-component_response_regulator_CbrB
032114dea2df3f2ccea1e62fb426478f	citrate_transporter
03235d8dc3fa67b4aadab9dd1d5ac05c	5-oxoprolinase_ATP-hydrolyzing
032587e2b4d9a44ca5039a58d2200c11	protein_translocase_subunit_yidC
03264755a3c1f0702b3076037811906e	TonB-dependent_receptor_plug
0327ddb389e04e181bec9174dffa8b13	catalase-peroxidase_HPI
0329aba7414cadc440b52f766fa6de73	UspA_domain_protein
032ba520837ff576fa0c4a721f29b880	butyryl-CoA_dehydrogenase
032c22f09a626daf4831fe3da023f7fb	UDP-N-acetylmuramateL-alanyl-gamma-D-glutamyl-_meso-diaminopimelate_ligase
032d20245ca47f9b6e2cdfa3073de055	iron-sulfur_cluster_insertion_protein_ErpA
032d68670ee7971772753ac4fbac5ca2	GCN5-related_N-acetyltransferase
033174aed6bb4c0b6523d688546b20a5	50S_ribosomal_protein_L5
0333701805faf912162d593961eb96bf	RNA_polymerase_factor_sigma-70
0335bc6d6d033ca2a798f60b8f7cf143	1-deoxy-D-xylulose-5-phosphate_synthase
0336c923fabd068b1c20111f7a91552f	hypothetical_protein
0338a861e25e468af93089d6a9a8ff32	phosphate_ABC_transporter_permease
0339e8a8c03498d66bcfe5190c682c87	phenylalanyl-tRNA_synthetase_subunit_beta
033a05702d3c04dea6ec6108b86de4fd	beta-galactosidase
033a2bb13e29aed334d29b7c36c450c9	hypothetical_protein
033d6506bb999e09a2b2ae3ebfdeecaa	ornithine_carbamoyltransferase
033d65df11178c2a09610f009252bd26	regulatory_protein_LuxR
033dedf65a552a344f85250d3c913b01	transaldolase
033dfddc5727d0e1fe65f42adb2b32ae	XRE_family_transcriptional_regulator
03438757513cb0e8ff2aa6169778eff7	polyR-hydroxyalkanoic_acid_synthase_class_I
0348aefacdc0437455187b9a5c58d0e8	adenylylating_enzyme_for_glutamine_synthetase
034afb70775b8aaf28fa1414b18ae708	chemotaxis_sensory_transducer
034f3a4c631c246ba551971cd603ddec	UDP-N-acetylglucosamine_2-epimerase
0350cf2c3283fafc676a0e73df91d010	F0F1_ATP_synthase_subunit_alpha
0351d8a1f9bf8e5da18b645005f0d346	hypothetical_protein
035475c2863490143f22306f15ebca5b	30S_ribosomal_protein_S5
03564bd656c1f1c29c0a5fcaef9e7186	electron_transfer_flavoprotein_beta-subunitelectron_transfer_flavoprotein_alpha_subunit
035869f546e14a33c8a046b82a6cf64d	diguanylate_cyclase-phosphodiesterase
03591031e063de9e67334e2fbed15c9d	urease_subunit_beta
035a563f0da4cfb0d49ac78b28b5e470	dTDP-glucose_46-dehydratase
035ab148adbf7be885b345aaba1408f1	integral_membrane_sensor_hybrid_histidine_kinase
035e36f0825f894f6045a8c15117fcfe	hypothetical_protein
035ef008102d1f929fd56ece0adfc40a	hypothetical_protein
035f99375f706a50aaa1b1fe91103fb4	FadD9
03671b8a200dc1213dc4a1a64eff9b79	branched-chain_amino_acid_aminotransferase-4-amino-4-deoxychorismate_lyase_family_protein
036bedf302735390cae6dbd63ca93c76	FAD-dependent_pyridine_nucleotide-disulfide_oxidoreductase
036d71ffc8f05316f417095fda178531	HPr_kinase-phosphorylase
036dd071b6730d43059bd637646b879e	hypothetical_protein
03721c436732e6b34ac477866c19c8b6	LysR_family_transcriptional_regulator
03749bdebb07fc94e26102e148ffd153	aspartate_kinase
0375a1d354b56c1c1b3121035accc601	periplasmic_phosphate_binding_protein
0375d0ab67dbc2bfe5c6b8dcc133f1c8	hypothetical_protein
037692c56a475536a0c6db2836839df5	isocitrate_dehydrogenase
0376dd621431df11da79072c9503b277	bacterioferritin
037b1b043ba336bcde3e8584e06469c8	AraC_family_transcriptional_regulator
037d10c48a75099d41c5aa520f7e0ac0	hypothetical_protein
037db5f156fb16fe41ba642a7cadbb00	GMP_synthase
038127f2933a05e73eb00676c430405a	glutamate-cysteine_ligase
03832f44cc160489c957e0f751e4385c	asparaginyl-tRNA_synthetase
0384895a184e7491ba6860741cf837cf	amino_acid_ABC_transporter_permease
0385de524da7e9e24aec75de1de1a948	Thiosulfate_sulfurtransferase
03876a48215fadb9d8acdfe113788955	diguanylate_cyclase-phosphodiesterase_with_PAS-PAC_and_GAF_sensors
0390c531978304e18d8550bd89cd0534	flagellar_biosynthetic_protein_Flhb
0394d81882d26bddb141cb0cace98f6a	s-adenosyl-L-methionine-_dependentmethyltransferase
039a5e7b9ec4cd8f5f9edbdd1e7f6fa7	LuxR_family_transcriptional_regulator
03a175124030fe9246eb1f376baa0364	nucleotide_sugar_epimerase
03a3ae29a4c9e0b20117c1f46ae6c774	glycoside_hydrolase_family_protein
03a663d5b847b3b43f884ab549a73ef3	basic_membrane_lipoprotein
03a7a5a6e86f70ae7029da482ba27a1b	hypothetical_protein
03a86a01990824e0b138cc7762510b11	xanthine-uracil-vitamin_C_permease
03a93104be1cd3d4c09c021e9fc79f45	undecaprenyldiphospho-muramoylpentapeptide_beta-N-_acetylglucosaminyltransferase
03a9da39a4ab60ceab4620cf57b59f2a	phenylhydantoinase
03abccbe788f06211fc2e45558a5d484	beta-ketoacyl_synthase
03ad7e62267bf059ad105601eee424ef	30S_ribosomal_protein_S5
03aed56db7d4d21db1aa086cbfadd611	metallo-beta-lactamase_superfamily_protein
03b2005c47691d69437d23c8fb61ef15	Methylated-DNA-protein-cysteine_S-methyltransferase
03c74ee62c226215ef51821a6ec04663	phosphopyruvate_hydratase
03c795d0ff500cea596df44750edbfaf	transcription_termination_factor_NusA
03ca72fe922b21a834aaaa0d208d86b1	chlorinating_enzyme
03ca9fa429b13d1d18704e8c53162d3b	inner-membrane_translocator
03cf09d72d7f419ea1ed92adef9e56ee	LamB-YcsF_family_protein
03cf14b27b52dbe5620aaeaf611720ad	serine_hydroxymethyltransferase
03d0c2ba66982c08e6864cec98a8b4fa	hypothetical_protein
03d1f7f094edb4d598cd554a993a43dc	xylulokinase
03da5feb8dc2ddcd3a45bf0491b37b95	hypothetical_protein
03dc6ea881b5f803a684bd4ba1f0143b	protein_of_unknown_function_DUF162
03e191461024b16ddb53c68a0d9100fe	AMP-dependent_synthetase_and_ligase
03e2253e8b56c722355d08fc7bd5044f	deoxycytidine_triphosphate_deaminase
03e58a7804f7ada177100d6b18a04f52	Lipopolysaccharide_export_system_ATP-binding_protein_LptB
03eb4f79570ef76a40628e55a80130f5	MotA-TolQ-ExbB_proton_channel
03edbddacb7ff817abdd347b5a37b6b9	oxidoreductase_alpha_molybdopterin_subunit
03f06b29058e7b76daf1c294c0bd945b	asparaginyl-tRNA_synthetase
03f6d256d5e6d54e1eaedb2b62177915	2-oxoacid_dehydrogenase_subunit_E1
03fadef4cd92602f47edefae163e6aa3	penicillin-binding_protein
03fbb235657325509dd1d40cdf8dd28b	2Fe-2S-binding_domain_protein
03fbc5c97f28b8ed0709c7c72317ddf8	conserved_hypothetical_protein
03ff617350ed137312a357daadc8dd14	ABC-2_type_transporter
0405bd35a8ec92097f8545cd1f091cc8	Enoyl-CoA_hydratase-isomerase
040647ee2be523dce0a66845e6a0fbbe	cell_division_protein_FtsK-SpoIIIE
0407f5b09b16284320bfa5c12fdaa764	LysR_family_transcriptional_regulator
040aeecc1364fd801a907a2f2507077e	hypothetical_protein
040b3b070f2cefbebb32a49f07b24366	phytoene_dehydrogenase
040fe6fcf3ed793a5edd82df90c0bdca	ribose-phosphate_pyrophosphokinase
04112b3360d1252d29eaf3b3dbaeec65	NUDIX_hydrolase
0413564fd93b078f9a7731744ff53871	MarR_family_transcriptional_regulator
0416b500fedfe5e5667b276a71db7454	queuine_tRNA-ribosyltransferase
041a894f625b0d580b48ec78b149709d	winged_helix_family_two_component_transcriptional_regulator
041f579fa86cdf5cfbac4dd03f1d80f5	Rhodanese_domain-containing_protein
0422bd7abfb6aab2057cbb8a28c90089	protein_of_unknown_function_DUF214
0423bb69a7ffc20875cb31cb742fbe00	3-oxoacyl-acyl-carrier-protein_synthase
0425860a8c52179b5fd87e8de385e7ae	cobaltochelatase_CobT_subunit
0426dc99abc5964323b2e8caf97ad699	MMPL_domain_protein
042790b8781eba6f324ed140c805ae05	two_component_sigma54_specific_transcriptional_regulator_Fis_family
042b7f2eac4d29e25ff210fe240e1266	nucleotidyl_transferase
042b9c3214e5cd80bd5bbea34ec39a7a	ABC_transporter_related
042ccd4919283eeaa7085cc5fb5ab5e1	Extracellular_solute-binding_protein_family_7
042d7184584da6ba7e4871d0875aecc5	excinuclease_ABC_A_subunit
04352f8181dcb8cfc3e43441a544a290	alpha-beta_hydrolase_fold_protein
0437a9d101068966337c20316a4d94c3	putative_membrane_lipoprotein_DUF165
0440c2f75d1d714ec08d53951711b8b9	mandelate_racemase-muconate_lactonizing_enzyme
04459f231032f629978b42c1408728d0	phospholipase_D-transphosphatidylase
04488d21aef1bc051977e56df6f2bb6f	pyruvate_dehydrogenase_acetyl-transferring
044aaeebb99c14ef197f445ef004b436	TetR_family_transcriptional_regulator
044bb2a56d0710b461b8aa935bec2717	Mg_chelatase_subunit_ChlI
044e8865f3bab8f121dcb8e0a54098e2	ketol-acid_reductoisomerase
0451d79e9d45ffe1d30e8bba967abc55	hypothetical_protein
0454ff8c43b13604add44b59fb2e9c08	30S_ribosomal_protein_S4
045d85dc09ba870a108a66529c47577c	major_facilitator_transporter
045e73861272891a0a9e8372dde84934	conserved_repeat_domain_protein
045ee7d68c27a19a3129bb583b3bb644	Mg2_and_Co2_transporter_CorB_family_protein
0461bbb77b3c06fca429682ac05191fc	phosphomannomutase
0463cb07312e9e3b4c8c6f195347c117	pyruvate_phosphate_dikinase
04648b58860792c7afbac11e92a77643	ferrous_iron_transport_protein_B
046fb662d67d80807e22f1adeae47215	hypothetical_protein
047038a003616fe883e329980d8b6cf5	DEAD-DEAH_box_helicase_domain_protein
0472928dbcf404ed235a206e37b9b016	methionine_adenosyltransferase
04746b52e1aa08ae2c172d799a4ec2c4	sulfate-thiosulfate_ABC_transporter_ATP-binding_protein
0479721031d45aa0e76e1d012f2497d2	Malic_enzyme_NAD_binding_domain_protein
0479ba48fec077de6641fd62c93afd9f	NAD-dependent_DNA_ligase_LigA
047a70de9e5e9c25bc4de943bf6952e5	ATP-dependent_Clp_protease_ATP-binding_subunit_ClpA
047c71361462636edf64faa92fdb3737	24-D_-_a-ketoglutarate_dioxygenase
047cb6cab1fe5a98c067a41a21b6d212	acyl-CoA_dehydrogenase_putative
04807c21494d54bff36a2f3bde72eeae	polynucleotide_phosphorylase-polyadenylase
04819ba191df14ae9d1e40dae0d987cd	iron_repressor_protein
04827b1bb6f4a905c39de41db494b246	hydrogenase_expression-formation_protein_HypD
048302144a8b4ffb5f1f5e754f89d713	short-chain_dehydrogenase-reductase_SDR
04834f996681fd8c5cae0c3e4a06ee5c	GatB
048c5085c45980114603acefffa64967	putative_transposase
048eec3b837f359ca88d1d238d723ff7	two_component_transcriptional_regulator
04917b0f68ef0e35cfd2f289183ec290	deoxyribodipyrimidine_photolyase
04918fe2a9d074525f66705e614cd522	probable_4-hydroxyphenylacetic_hydroxylase
049303ea5165835f7d81b471d5a0b113	peptide_chain_release_factor_3
0497503aa62dde3e0dc9208c5f65c4e6	AraC_family_transcriptional_regulator
049a19d3b6c3862d7e7797be425e756b	Glu-Leu-Phe-Val_dehydrogenase
049c8f861d0075087d2bbfc493214be0	hypothetical_protein
049e314c2f8ad7b4201d872d52971eb9	6-phosphofructokinase
049e6f94c7f4cb3f0d39d049f100a537	phosphoribosyl-ATP_diphosphatase
049e907f0212369227f41e3ce4ea4ffc	putative_oxidoreductase_protein
049f2ff95677b915ec88db7bcbad8de6	sec-independent_translocation_protein_mttA-Hcf106
049f7980eb3caedba8c17529cd15fb6c	nicotinamide-nucleotide_adenylyltransferase
04a02cdc69b8cb98fc2adbaf9d12bdb8	dihydropyrimidinase
04a20ad1893123d92b15d760d457fd18	alanine_dehydrogenase
04a61b21bc2e5e5f6d1b1d4deab8eff8	putative_general_secretion_pathway_protein_D
04a66cf9b763ef5def2c61506239c32e	hypothetical_protein
04a89bed1098049fee5704ec79dd434b	hypothetical_protein
04aa809989cc98765932cfa0981c358d	TENA-THI-4_family
04ad5c8134de402a0f7bf198e316d6c1	serine-threonine_protein_kinase
04ad81ea6a9607cf923c6071fc932813	hypothetical_protein
04b03e3d9099f6927c77e3be138f37d8	polyketide_synthase_type_I_putative
04b1ca16dcdc2238d22167a815827cb8	isocitrate_dehydrogenase_NADP-dependent
04b3ced3afa69946fac2f19a5ea7a51d	RNA_polymerase_sigma-24_subunit_ECF_subfamily
04b4233a42427671a658c74b60a29540	protease_insulinase_family-protease_insulinase_family
04bab8c24f5d9bc2667894ad8f710dd4	60_kDa_chaperonin
04be5dc8e26e1272ba6aaffbfe29916c	replicative_DNA_helicase
04c0bce0ac58257ed5996aeecaa8c028	preprotein_translocase_subunit_SecY
04c0ded9a43168e2e8c0977003f7f192	major_facilitator_superfamily_protein
04c14e5609138dbec38e2c3827316acc	hypothetical_protein
04c495496f37bf926e3cae62341d1bc1	acyl-CoA_dehydrogenase_domain_protein
04c595277a89ac361f0992917a14927a	ADP-L-glycero-D-manno-heptose-6-epimerase
04c6901e33a9c5c58039f1ea4a49e078	glutamine--fructose-6-phosphate_transaminase
04c7cda386b781f4dfcf0ecf11619911	Glycosyltransferase
04ca43879518c2edaaa211620f15f889	glutamate_synthase_subunit_beta
04ca5d02c49cf7f5ca842197a8840313	DNA-directed_RNA_polymerase_subunit_beta
04cb2a0282d1c08946f4e9a71ab5a13b	protein_of_unknown_function_zinc_metallopeptidase_putative
04cb6a97b149bfe0112a3771299b2708	hypothetical_protein
04cf214821fab25edc58d1cb28eead46	hypothetical_protein
04d15cab84193ab6e9cc8cceef0815ba	2-hydroxyglutaryl-CoA_dehydratase_activator_protein
04d47471e55349f7fb2142e94e859460	acyl-CoA_carboxylase_complex_A_subunit
04d5808b49806a6983dfbef6bf6c0955	Short-chain_dehydrogenase-reductase_SDR
04d5f78f406cc1ec5e0f81cec93015e2	FolC_bifunctional_protein
04d6cfbe8d6786c140428646e88850a3	ligase
04dd4af403232ae700b5313b09b7c65b	NADH_dehydrogenase_quinone_G_subunit
04e7cf8ba165339e44dd65c670df007d	glycogen_branching_enzyme
04ea58ab63cc018f777f63924ae82f52	hypothetical_protein
04f0f0f21e3df9c02ca60cc4881ba63a	preprotein_translocase_subunit_SecD
04f2e0c165e8897e5d52fc23e59e2683	phosphoglycerate_kinase
04f3eba41b50e4d704ae6b440fd5512e	transposase_putative
04f5d7f431cebbe75468020a5cedb125	putative_signal_transduction_protein_with_CBS_domains
04f5ef06e1e05b3a7f0f5cdff413ee48	nitrate_reductase_catalytic_subunit
04fa156973d2690b37b63ff0241fa01c	two-component_response_regulator
04fb35277401180c2a3c9c2659216505	cysteine_synthase_A
04fbb327df5d4e3007cad8d459ee67f9	CTP_synthetase
04fd1eba94e05d23d3f7d01770a5a9ab	argininosuccinate_lyase
0500154ac08544e71066d32e8b974af2	ECF_subfamily_RNA_polymerase_sigma-24_factor
0504080e30a926a86daa2f1965cf3c84	acetyl-CoA_acetyltransferase
05070425b8546e01d3c3b467967223b7	acriflavin_resistance_protein
05073f664b7edf5666f56527c2e42229	DegT-DnrJ-EryC1-StrS_aminotransferase_family_protein
050b217eddba82b6f9b13c190addb6b3	ABC_transporter_permease
050b8d49f4d0a26845c300351d0ac0c3	major_facilitator_superfamily_protein
050cdbf5f4bde00a8963594829e24f68	PRC-barrel_domain-containing_protein_AvaK
050e5c5da3d6c74268fcf92f7bacb06e	putative_heavy_metal_efflux_system_outer_membrane_lipoprotein
050e892cf439cff95dd0833bc86a8a2e	putative_helicase_family_protein
050fec4579c9cd0bcb67dd698dc46158	Uroporphyrin-III_C-tetrapyrrole_Corrin-Porphyrin_methyltransferase
051008cc999586f8732c6fb6c6d96d3c	aldehyde_oxidase_and_xanthine_dehydrogenase_molybdopterin_binding_protein
051049db51913bbd1a54d4d75d88a26f	Tryptophan_synthase_beta_chain
0511122d560331e1aa86454ceed56987	tRNA_pseudouridine_synthase_A
05174406c84c18cbd7e6d9c2c624178f	periplasmic_binding_protein-LacI_transcriptional_regulator
051a2326ee0440128953bb2aaebd1201	glutamate--ammonia_ligase
05217d9e096dadb4e01aebd3aa8d7c50	hypothetical_protein
0521e04b5180f4897e8bd78436d875b0	hypothetical_protein
0524b7bb2728f982759b28fe67e5d979	ABC_transporter-like_protein
052a46ddd00d1f30bd9d850fba0fe55e	bifunctional_methylenetetrahydrofolate_dehydrogenase-methylenetetrahydrofolate_cyclohydrolase
052fee95a003442af81b0ce48b3ba474	hypothetical_protein
0534a55cdf90c65c20198c7f842e3435	lipid-A-disaccharide_synthase
053722ad4c100c96109ad3fc746a8f06	tyrosine_tRNA_synthetase
053769a04a8a43d268f5ab3462017c17	hypothetical_protein
05376ba0fbcaf1bdf246b64006ad6d66	drug_resistance_transporter_EmrB-QacA_family_protein
053c7031b6602245a1b82ba40cc682c4	putative_dehydrogenase
053d39db82a74811ff42baebe3376d37	nucleoid_occlusion_protein
053f433ae2aefe4c8fa21bd4ab4028da	asparagine_synthase
05423f37921a4912d9b5dc9b0f431796	dihydrolipoamide_dehydrogenase
0543f27e71a84e1d50aa373c9620cea8	ABC_transporter
0547a5ca6f53105d786e01bc32dfe102	thiamine_pyrophosphate_TPP-binding_domain-containing_protein
0548813ef3b08dd1c40fedc7243a2656	putative_agmatinase
054b66f0a1d88eee2bf80e866984ce0c	glycerol_kinase
054b96ee53537a6bd101aa6063515443	Na-solute_symporter
054c1a236fcf1006c19fca3bd0e1fc1f	alcohol_dehydrogenase
054d2a710e02f98080cf08a1fbcd707f	undecaprenyl-diphosphatase_bacitracin_resistance_protein
055193f3f7efc7f08f2054cdd7dba056	hypothetical_protein
0551d4c2520aba86ab51b5c63285e8ae	Ankyrin
05549e3e0343aec8fd240da24375fc32	hypothetical_protein
0556f47c5b23b65f7d0b6c1f1eb48c4b	arginase
05583e0049397369ba0f3c16239731e5	cation-multidrug_efflux_pump
055a55b828d573e62c91a5b4cbc4359e	outer_membrane_protein_assembly_complex_YaeT_protein
055ded27ca8bdab30d450c98f022a6f6	sulfur-carrier_protein
055f35880ac7ccf847096c7154b0812a	tartrate_dehydrogenase
055ff32ff9e84e96cc2f453b121b350f	23-cyclic-nucleotide_2-phosphodiesterase
056345664a6b44d2f64afc6e685b0dff	hydrogenquinone_oxidoreductase
056e5549c13d6652d948f8cc2d95f7cf	3-deoxy-7-phosphoheptulonate_synthase
057075c98e15cc99ef938beb11b328c6	formate_dehydrogenase_alpha_subunit
057789bcbdd6c8ac27620959a3c69ae1	hypothetical_protein
0577d3566cb35cf2a054989f6759ce3e	DNA-directed_RNA_polymerase_subunit_beta
0578fa827c6216cf0553bd551920254b	hypothetical_protein
057e92f19987d69ab7b8c301016e74f6	ornithine_decarboxylase
0583120253cda46333ebfad3f6ece819	homogentisate_12-dioxygenase
0583b949618262d0845a528e75e523d6	hypothetical_protein
0585f9a46a4e9e883ca7eadab8df0752	Amidase
05892a79ec53bafc01dfc2fb22d96496	cytochrome_C-type_biogenesis_protein
058ab5bf3cf2824bfbc8257737c00d1e	hypothetical_protein
058c9768341244baffd0535235b907f3	cystathionine_beta-synthase
058e7ed84ce6bcf13bc343876042469b	5-oxoprolinase_ATP-hydrolyzing
058eb221d6220c3b6563871096837f62	putative_protease
0592991c70255ed5142e38829589a9e0	periplasmic_oligopeptide-binding_protein_of_oligopeptide_ABC_transporter
05949aa2629523f785dba42815dff804	Inositol_oxygenase
0594f438501df3afe13ff738e10c7d1d	hypothetical_protein
059809b379f372f01953f2740717d19f	ABC_transporter_substrate_binding_protein_glycerol-3-phosphate
0598eecdbf6c47a09fe1afeb36565a4a	34-dihydroxy-2-butanone_4-phosphate_synthase
05a1023670fc45548f9ac505e2321729	hypothetical_protein
05a2ac86c44759959dfb2f3ee76f6d99	serine_hydroxymethyltransferase
05a53478a772241a945907e6953a34f1	cytidine_deaminase
05a6509ecae796d827bd613c6132515b	putative_metalloendopeptidase
05a913db653dac5bee2394fdc0e26256	cyclic_nucleotide-regulated_FAD-dependent_pyridine_nucleotide-disulphide_oxidoreductase
05a9383196a649df56b921e078bc114b	hypothetical_protein
05b477ed2b9c372cabcc7f919444baba	polysaccharide_deacetylase
05b66f20010cac1d1568a02f011051d0	ABC-3_protein
05b6c5f198efe10112e1220d2ec7e6d7	hypothetical_protein
05b860773efc0ce29765940dc0b44eee	Membrane_alanyl_aminopeptidase
05b8a17216ef235c294401d00641de86	CoaB_phosphopantothenoylcysteinedecarboxylase-phosphopantothena_te-_-cysteine_ligase
05b9f7056dbcae387a22f23b6ed7f014	short-chain_dehydrogenase-reductase_SDR
05ba572c2c1ce2c59420141dbfb1ca16	PvdJ2
05bb77f93460ba5aabcb28636e4a0693	Amylo-alpha-16-glucosidase
05bdbc7056b31d0eb302350d450cf1c6	oxidoreductase
05c2399662052fcc1ad47c04c25c90e8	3-methyl-2-oxobutanoate_dehydrogenase_2-methylpropanoyl-transferring
05c6b3d6aed6bada06ddc82280d1234e	acetyl-CoA_acyltransferase
05ca80a544149570071266f25ea73833	hypothetical_protein
05cce9a5b0235c431cef07e225f77747	phosphoglycerate_kinase
05cd0036010c292b465256c3c5e44311	molybdopterin_oxidoreductase
05cd350a97a1cd798d368c5b97f224b7	glycogen_debranching_enzyme_GlgX
05d2c5f770620cf20f52592a147fee0c	cobyrinic_acid_ac-diamide_synthase
05d6b2648332a3e4b710bd7eb55e74f6	ArsR_family_transcriptional_regulator
05dab138997cccaf1f88f326fc4cec64	2-oxo-acid_dehydrogenase_E1_subunit_homodimeric_type
05de71ce649b72a908639b09493c2b22	NADPHquinone_reductase
05dfea719ae41a47c91144a0cbdeecf5	hypothetical_protein
05e139b52e61419a6d3d1a07eb99a211	acyl-CoA_dehydrogenase_domain_protein
05e163dd10c4931b30143fda4487cf84	drug_resistance_ATPase-1
05e1bebbb70aa85d4bc7633d4bf6f72d	drug-metabolite_transporter_superfamily_protein
05e71906ff8d8740050b064db12cd45d	patatin
05e733d59b20712d7ed7928a7be9a124	amino_acid_carrier_protein
05eaed8fb1a1556b56afdcb2e29c4640	hypothetical_protein
05eeb9e57d7dd246c47262c27e2b42ba	type_II_secretion_system_protein_E
05f2806281420a419ffb6c2deec382aa	succinate_dehydrogenase_cytochrome_b556_subunit
05f674507d56f0007417afc89f94bed1	transcriptional_repressor_LexA_family
05f753b069e2b3f779069aa0d7b7e782	hypothetical_protein
05fd3630b38e38639da6835bccac3ff5	MCP_methyltransferase_CheR-type
0600f1ad24b54027084a698b62c627ed	enoyl-acyl-carrier-protein_reductase
06049e8d3f079745b6c958030217a1f9	hypothetical_protein
0604d4f8e313da0a1747f7dca545716c	imidazole_glycerol_phosphate_synthase_subunit_HisF
06089f2987e6f935c761dd04881cdcf7	cyclase_family_protein
0610d506d4aaea79cc53e1fa38fad41a	General_secretory_system_II_protein_E_domain_protein
0611a9f07b6fe386bed65e341badc1ab	PAS_fold_family
06129da8d8dd2f903dc42127e30f7264	L-carnitine_dehydratase
06175f4923eff278bd52147322f79f4d	nad_synthetase
06180e276159bb2e2803bbb0a4c4d3a0	hypothetical_protein
0619a51fce6011c28f6530adf4650eca	protein_of_unknown_function_UPF0261
061ca78f448d624aa528d2d550220d90	carbonate_dehydratase
061eece9775ed32d935414f09bd56c68	thioredoxin
06202fb86757a5f061bfdb54c8af1321	acetyl-CoA_C-acyltransferase
0621d3f4174674574c9d8f80f874ffe0	imidazole_glycerol_phosphate_synthase_subunit_HisF
06273c42950f46e82fbef6c353730eca	hypothetical_protein
06280149ab4ae5b920c289886c94f3d6	xanthine_dehydrogenase_subunit_A
0629ae16e6cb9bae0dc039f90003a123	glycosyl_transferase_family_2
062a2866ce34f4727c8de95deaad9698	translation_initiation_factor_IF-2
062d3edb539943742f5f61198943c8ea	acylaminoacyl-peptidase
062d6f3d2c23cb36f11303a346e484b3	cell_divisionFtsK-SpoIIIE
0632ab825af37be2d42d5df010a12e2d	sporulation_stage_III_transcriptional_regulator_SpoIIID
0632b0c6f0af2d637efde0756ab959f3	ABC_transporter_related_protein
06367b4ae09077355e9c73d616831e00	hypothetical_protein
06389dbd8d941cde21314f4ac7cb0502	CinA_domain-containing_protein
063900c887ca48fa544964ffd1c98eb8	molybdopterin_oxidoreductase
063b31cf35f1e9c696518e14dfd1082d	ATP-dependent_DNA_helicase_RecQ_family
063ee7f94dfa86f723e83f7bb31babca	Cellulase
064374294687f49f98347ff6461c0ecb	NMT1-THI5_like_domain_protein
06498b0644738489ac05c97b985f4112	NADH_dehydrogenase_subunit_H
064cfaea4fec9acc0acf46bb414d8564	RagB-SusD_domain_protein
064f593ea69c318621ea08877cba5da0	aldo-keto_reductase
0651bc597bc370a2af271f9690c5a0c9	hypothetical_protein
06541d06ffe8a2e661fbf98898b68c78	probable_n-acyl-d-glutamate_deacylase_protein
0658918eec108a5fa1abf667415a9ad1	DNA-cytosine_methyltransferase
065b808f03cb4d368869b0e055129555	ABC_transporter_related
06620b743e9f37225e3ff7f0589fb205	proton-translocating_NADH-quinone_oxidoreductase_chain_M
066cfd37ece487b45c0214d85cc8bc52	conserved_hypothetical_protein
0671d99676d532ad1791f69e691d56c7	two-component_system_response_regulator
0672bee25115e7e7f900aefb9e4be971	integral_membrane_protein_MviN
0675e0a88d93a9f9462e10417d283716	hypothetical_protein
0677122524029b173f3b2b11cc3afaf2	hypothetical_protein
0678190f778821e6ffa6480213b03c44	CDP-alcohol_phosphatidyltransferase
067b38918decb7a798c19f8aa62a7e4f	fumarate_hydratase_class_II
067cb22c8c13cd732fda8b48da606de2	5-oxoprolinase_ATP-hydrolyzing
067fe7e0d91ad22f110127b3f3e2a2e9	conserved_hypothetical_protein
0682a3b5d4fafb49b248dacebe18e340	LysR_family_transcriptional_regulator
06850d00f5e25ec1f16010331445ab95	Acyl-CoA_dehydrogenase-like
06865af48918e0b3531b876316b73015	multicopper_oxidase_type_2
068743b46f075ab9f30284459f683e04	2-isopropylmalate_synthase
0687c9ae015fc38ceb6982e21bbd7800	aspartate_kinase
068984e61fccadb50432c42ee15cf408	ribosomal_protein_L1
068cd99741b00af2b843f309f617e33f	transcriptional_regulator_LysR_family
06900235bd27a4c4fe0c088b254f8d4d	hypothetical_protein
069064be16671fca430dbe10d0372cc4	FtsH_peptidase
0691bed1abe24b0b833b891b8a38ed5f	DMTdrug-metabolite_transporter_superfamily_permease
0691d84d0317bfd4214537db45377e55	Nitrilase-cyanide_hydratase_and_apolipoprotein_N-acyltransferase
0693e8dd734b073940c096a7c4dc3778	DNA-directed_RNA_polymerase_beta_subunit
06964837acda2522faa61c115b2e06b8	hypothetical_protein
0696cc2c4695fadadea2ea6463ede570	hypothetical_protein
069d8336be32f324f4325d5e8a22da7c	adenosylhomocysteinase
069eb83478815f1204f47c29b4c4e744	enoyl-CoA_hydratase
06a59f7241dc0265ddd7b730a5ebdb88	ribosomal_protein_L7-L12
06a8cece29d793ad789f287e94567f87	short-chain_dehydrogenase-oxidoreductase
06b33eef02ac7e825d4d7e4c5db6ea97	beta-lactamase
06b6c9edd34252d7cbab34dea9535d78	DNA-directed_RNA_polymerase_subunit_beta
06b73e663adcb35cc6f2fa5921dac02f	Amylo-alpha-16-glucosidase
06bc3ce04309e62db1aadcd5041595b9	chitinase
06c0522b6edcbbc2b16693d4f6b9be1f	TonB-dependent_receptor_domain_protein
06cbced49ed4e15f36b91613cabdb4c7	succinyl-diaminopimelate_desuccinylase
06cbe22a8a302d18211c52082acef916	DNA_polymerase_IV
06cd3626152467b50c44f303901f00b1	polysaccharide_deacetylase
06cd954f2b8f574260a5a15d62de0eec	amidohydrolase_2
06ced76e99dfe9884fdf08bd0bfcd385	decarboxylase_family_protein
06cf6893472bec3bd16d676597c97de8	hypothetical_protein
06cf78ebdeecfdddfe59744d0e1cdd7e	multi-sensor_hybrid_histidine_kinase
06cfb8138ff45ef07d2c16f80c9cfd6c	ribulose-phosphate_3-epimerase
06d31e2bb0de7afc573964783fe49303	cytochrome_c_oxidase_subunit_I
06d409e21ca05247096fb8e11e6a01bc	preprotein_translocase_subunit_SecD
06d49f4714c5dae0d47cced854fb310e	Endoribonuclease_L-PSP
06d5d27ee4825fd2758736ccccff2f2a	ABC-transporter_integral_membrane_protein
06d79ed309591115120529324e3f0dfe	Pyridoxal-5-phosphate-dependent_protein_beta_subunit
06da28fdd70306fa15faf7edf574e3ae	xylose_isomerase
06dafc2cd2a3cc39df771b688bf8a950	Oligopeptidase_A
06dc5e2289d15ed484d40a7bb6e94561	4-hydroxy-3-methylbut-2-en-1-yl_diphosphate_synthase
06df5c6a84bde76676ec3ea47fc59ee3	leucyl-tRNA_synthetase
06e1d1ae262b2bec94e86d053c72a6bd	beta-ketoadipyl_CoA_thiolase
06e7d69d962696cd57da85a7abf0a422	hypothetical_protein
06e9d6dabaa970a498e47336fc407c35	D-alanyl-D-alanine_carboxypeptidase
06ef7633caddfac08c89a33832726aa8	TetR_family_transcriptional_regulator
06efccc8ffd4cf3b2052356a78aaf092	zinc-binding_alcohol_dehydrogenase
06f4003092ca26c1395091af4705cf50	hypothetical_protein
06fdafc3f505f9883b519230ccdfbf21	oxidoreductase_domain_protein
06fe568765b2216b973187ce3ee29872	ATPase_AAA-2_domain_protein
06feb612d4e9e2dbfd7015599f0f5aaf	aminopeptidase_N
07012ceb491da6a94938abd3b5a080ca	s-adenosyl-L-methionine-_dependentmethyltransferase
0701389ef2963fe95a865f3aeae31d7d	glutathione_reductase
0704d163d8331a9aa1d0a22e1d66c89a	glucose-1-phosphate_thymidyltransferase
07068fd5b28d901024643a8fb94da382	1A_family_penicillin-binding_protein
0707c991dfdf5e5c73b07483afbe5f48	peptidase_S8_and_S53_subtilisin_kexin_sedolisin
07096c519344bcc13b63244a8f6b7bc4	CBS_domain_pair_protein
070a75f69d1e45ff238b982d0a3b675c	oxidoreductase_salicylyl-CoA_5-hydroxylase_protein_abma
070dd060040fd25eb6c8a09c08d60281	metallopeptidase
070decb48d9f1618465503853c0bb967	negative_regulator_of_allantoin_and_glyoxylate_utilization_operons
07110f8ee8edc43e760939109c60efe8	AMP-dependent_synthetase_and_ligase
0711ed1c228b2415c1086cbd11ab2842	hypothetical_protein
071979ef59091c2e3caaf587ec1c3826	Rhodanese_domain_protein
071c176894b786505ee69fec644d7356	ABC_transporter_ATP-binding_protein
071e24cba9dfe8347fc7ee9f08d35bd9	aspartyl-tRNA_synthetase
071f4484fd972181d721851b9b343667	PfkB_domain_containing_protein
07215c4cb6742f806ce2b0218b24eb4d	acetate-CoA_ligase
072c60339ecce64920b527c415346ad5	Ars_family_transcriptional_regulator
072f63b7fc23a317dab7d1017d0cb232	type_IV-A_pilus_assembly_ATPase_PilB
073297ae19a76e7a701285b7979aaa80	hypothetical_protein
073cb8a9a3bbafbe0cddbf2c99f9c893	HsdR_family_type_I_site-specific_deoxyribonuclease
0740dfddd61e439ef8c40dcfe07754b1	acetoacetyl-CoA_synthase
07463922925f742ad8473c08165daea7	4-aminobutyrate_aminotransferase
0746ae8491af6bd1836b1dba2aa79926	major_facilitator_transporter
07470f9d5833c75a64c2d6f3274ed65f	conserved_hypothetical_protein
074a824a4f89794c511fa6172b85ab5b	cofactor-independent_phosphoglycerate_mutase
074aaf8dab247c97116541b2b78443dc	recA_protein
074cdc20193ae278e7ad59213d72740f	aspartokinase
0756b34f9e23f4116179292751264ca4	putative_two_component_DNA_binding_transcriptional_regulatory_protein_TCRA
0757e12e4e510849f5765d68b2cc14c6	L-aspartate_oxidase
0759012940e3da84404f46147375b848	chaperonin_groel
075d73023157bdcd9f8eb31f3ab53e70	molybdopterin_synthase_subunit_MoaE
075e962a63ad6f7f3ffb5b8bc0f6cc39	hypothetical_protein
076579934b7e54ee7249559fa9fa3a84	hypothetical_protein
0766a1ae07924cded7ab197223c7a732	50S_ribosomal_protein_L2
07673844510b3c165eec038c062b84c1	glutamine_synthetase_catalytic_region
0767be39c95a058edf0d7563f80e16ac	cobyric_acid_synthase
076b904548e00683d6b2a47ba038741d	ATP_synthase_F1_subcomplex_alpha_subunit
0777c3bccd0522c4e15e656d562bbd30	oxidoreductase_domain-containing_protein
077985212206e1e96ccbe47ffa9eb9f0	hypothetical_protein
077c8b62b6da8b63b7e4c11dc71b43a7	aldehyde_dehydrogenase
077d06e68eccd5b9afc69f43c1feaf31	peptidyl-prolyl_cis-trans_isomerase_B
077d17bd42bf5a85fc5764ee1cffa4cb	HflK
077e2e81f8f808e5634577044ba8fff9	GTP-dependent_nucleic_acid-binding_protein_EngD
0783f05e0edbf86e4e4698b51a90006b	TonB-dependent_outer_membrane_receptor
078760b80b63fc152039b160b5036db2	hypothetical_protein
0788061de8eb8a9a2b02429bce0d6acf	Phage_major_capsid_protein_HK97
078afb39fdc47b861a171882341d6af3	putative_hydrolase
0791c9ecabfe0aaaceb53a196f52e85b	manganese_ABC_transporter_ATP-binding_protein
0793bfcb4bca38cc3a49f1780900c146	cytidine-deoxycytidylate_deaminase_family_protein
079db24eae6700f9245842975cb0f1f3	aminotransferase
07a0c9fb0bbc6811e0899c816351316d	hypothetical_protein
07a53948f6b4b57ce1d3e05b1a1c3754	hypothetical_protein
07ab03c60c8d4a7383d08d5137bb75b5	ATPase_associated_with_various_cellular_activities_AAA_5
07aebf7d44007d88b24d0373b06f948c	potassium_efflux_system_protein
07aed8fa89d569e8e0f60b70a0ea6cd9	malate_oxidoreductase
07afe1b8ae1cfc077515004f5da3fc1b	cytochrome_c_oxidase_cbb3-type_subunit_I
07b06f1486eebf0cf392a29bda116f20	acetyl-CoA_carboxylase_biotin_carboxylase
07b16e281763f158fb1a5afc982130db	translation_elongation_factor_G
07b2cb157b12837719ed3d91400b3276	hypothetical_protein
07b3b3dbd65a2be3029df6c1551baf0d	altronate_dehydratase
07b4a537d5873d830bd8cc442b1094ff	aspartate-semialdehyde_dehydrogenase
07b874dd07ab51de21e061ab4d709a94	mercuric_reductase
07be74ce658c4012d3f2b468b71758a2	glutamyl-tRNAGln_amidotransferase_A_subunit
07c3749eb6cc5901865cfcec270d91af	hypothetical_protein
07c48f54f047b3da5dda4c4f9ffe721f	amidohydrolase
07c4f247f8e24e4f06990d40856e2cd0	acyl_CoA_dehydrogenase
07c89a71fd20899c09b1fd31a4918d8d	RND_superfamily_protein
07cf4ab8ed6ccfa5546e7157ba674034	PpiC-type_peptidyl-prolyl_cis-trans_isomerase
07d119c9289ba75690df7b1f187d7451	hypothetical_protein
07d1f2b3a913497a542e9bd5f9f88693	reverse_transcriptase
07d3412d34a84ac65f37bd6a8290910f	putative_short-chain_dehydrogenase
07d624339b04a43645007c8b0785d917	elongation_factor_P
07d6cb8cce196a1f7a705032c836986b	putative_agmatinase
07d8d2ebdf388a537b466cf16917774c	integral_membrane_protein
07dbbc1d11fcbc577681bd868a4817fd	CDP-alcohol_phosphatidyltransferase
07dcb4bf07e87c9c916ff3673394d5bb	MOSC_domain_containing_protein
07e12e183508f1ba90fc17dbc2749fc4	acetyl-CoA_acetyltransferase
07e4aeab2de3cd5dd8a7c82f9dbbef46	major_intrinsic_protein
07e7390a59c1b77b2cb0cd61904525cd	DNA_polymerase_III_gamma-tau_subunits
07e89697323a908f7a3902f55d446d66	sensor_histidine_kinase
07e95261d29a3cc40c93b2fa726a81cb	alanine_racemase_domain-containing_protein
07ea383278342f7a1f7a122d980a7f68	protein_of_unknown_function_DUF1801
07ec8bb7dbc67343ebec9a22da5e40ee	phosphoribosyltransferase
07efdaac478abc1727f12d3cc74dd0b9	signal_peptide_peptidase_SppA_36K_type
07f07559394872842b34920ca37d7b38	hypothetical_protein
07f32b81324ef81d6aaf5b81cd8bc42c	heavy_metal_efflux_pump_CzcA
07f61ed30b83cffedef54711981c9b20	alpha-L-arabinofuranosidase_domain_protein
07f9aacb2895e2d504a01f351aad7b8e	S-adenosyl-L-homocysteine_hydrolase
07fd821c8646793a96ecc11c75be7c0b	alkyl_hydroperoxide_reductase-_Thiol_specific_antioxidant-_Mal_allergen
07fee2f46b95f011382d5a19ba9f9ce0	protein_of_unknown_function_DUF1006
07fff3faefff6fe1a8c0774073d0552b	hypothetical_protein
07fff7c358898184f85767d9f877292b	oligoendopeptidase_pepF-M3_family
0801e6decf0c72f994edb9a9d895e314	hypothetical_protein
080521ccf2b12cb889f847fb0047eab7	LSU_ribosomal_protein_L2P
080d0bb152664f6cb5294b98537d14c1	OmpR_family_two-component_response_regulator
081330bc174e85d2ad39612f2766193e	tyrosyl-tRNA_synthetase
08140ad56ffcc28900594939025eb737	glutamyl-Q_tRNAAsp_synthetase
0814e707f8d9d0b84365601e8c3198d0	GTP-binding_protein_YchF
081815cf793a7bddd0624584921befbf	permease
081d3e4788992c90202662423bde3e75	peptide_ABC_superfamily_ATP_binding_cassette_transporter_binding_protein
081fe5ca778009dce73896ec372c4d62	molybdopterin_biosynthesis_protein_MoeB
0820e18bc5c6fda6ffe746a5e8c35307	NLP-P60_protein
0821419a89613de93f8674be5055c390	rhodanese_domain_protein
08220152e372d9355ba2f5f621f14773	threonine_synthase
0825976bd327e7059b690d5e9529c1d2	NCAIR_mutase_PurE-related_protein-like_protein
082696c147517443167e1cf47afdb866	homogentisate_12-dioxygenase
082ca80571556f56768ff9bdb2db9b83	FAD-binding_domain_protein
082d6cbb48b78ef7416be678e500f71b	polyketide_synthase
082f259854d2cbdb6ba7b642df0a49e5	ferric_reductase-like_transmembrane_subunit
082ff9a8640dd73ec6c797d4ccbf3380	protein_of_unknown_function_DUF853_NPT_hydrolase_putative
083003845782d5201069c30e59a29e11	protein_of_unknown_function_DUF894_DitE
08341172c31595dfba5cb20adb770829	phosphomannomutase
0835cc185f0923323fe5a29bd0f0bc89	prevent-host-death_family_protein
083b432e1fbd15f789a7a2b39e7b20c1	cytochrome_bd_ubiquinol_oxidase_subunit_I
083d1d9964eb2739de3cb9a748e6ae43	ferrous_iron_transport_protein_B
083d4fb784681d93f3a1926d50155a5f	heavy_metal_efflux_pump_CzcA_family
08405182be707e9bfd59575300997c06	hypothetical_protein
0841c834206cd9a3cec8280627cc2a84	glycoside_hydrolase_family_2_sugar_binding
08456599b80e250ef3e7a2a34a3e6ae4	TDP-desosamine-N-dimethyltransferase
0846257dbbf6023973f5db7541fc64f7	ribosome_recycling_factor_frr
0849248b4773cc412a8f6f94a7d92bb4	phytoene_dehydrogenase_putative
084a4506496dda85b7298a0fcf400637	hypothetical_protein
0852705247c87ac2080649a218dfb353	NADH_dehydrogenase_I_D_subunit
0854279ddec47541804c3154d83567a8	putative_PAS-PAC_sensor_protein
085428e59dc35452adad9177107cc7d1	glucose-1-phosphate_thymidylyltransferase
0855e9eaf5acce27d9a29de9f63e2aa6	acyltransferase_3
0858ba6e6ac1b8de316f3336176679be	hypothetical_protein
0859b113ef66ed0870a826b408869e61	putative_signal_recognition_particle_protein
085a03b09eba2fb1a222248bc06ede3f	hypothetical_protein
085d2fe9916b1f64b16dcef661cd6f81	ABC_transporter_inner_membrane_subunit
086201c079bcf927b44f9938d106ec36	chaperonin_GroEL
08641a1162cd70d066d9eb98a73959b7	hypothetical_protein
08661830e61a9a2b2278ad475cae09e3	two_component_LuxR_family_transcriptional_regulator
0866356ce1352a3c0bb53a6f4e4ff688	hypothetical_protein
08690430a049e0411199e69298f2ee3b	hypothetical_protein
08691bbeba91ef126be8e335b641ac4c	Adenylate_and_Guanylate_cyclase_catalytic_domain_protein
086bd2846315adb9e0f07ab52fa5ade4	putative_proline_dehydrogenase
086d701ad636bcde3bb85114e9ecb425	AMP-dependent_synthetase_and_ligase
0872654e36f4d45b1deb1cd25340a798	nucleotidyl_transferase
087549e07605f630ca2cfb9d4b3279e0	putative_dioxygenase
0875e51f637fb2b9bfdd190e494b4956	hypothetical_protein
087848b7959160779fac55f6b7a697d9	glycogen_debranching_enzyme
0879bc4f3c14b86e796af24469e329f6	signal_recognition_particle_protein
08800aab7b948c4d92375a072cd2d77f	methyltransferase
088038ec6378fb70707220d0629736b1	glycerol_kinase
0882b03b7674b2475eb5abf8b611a054	inner-membrane_translocator
08870ff5146d5347c2c3fe93a0b52a2e	UDP-N-acetylmuramyl-tripeptide_synthetase
0887f1e01a60792eb4ec22f1b8bf57f5	3-hydroxyacyl-CoA_dehydrogenase_NAD-binding
0889fd6743f5c4522bb27c0773fb40bd	acyl-CoA_dehydrogenase_domain-containing_protein
088e14a00438cf35319b49d8ac862179	predicted_oxidoreductase_aryl-alcohol_dehydrogenase_like_protein
088eb64cae0f604cf16862518a61f7ff	hydrogenobyrinic_acid_ac-diamide_cobaltochelatase
088f448856bd2f89ade943a63a3be44f	biotin_carboxylase_protein
0892a91dce918ca47704840bf6f07179	chromosomal_replication_initiation_protein
089bdc69d8010df10ce4f5fe31795c27	Fructosamine-Ketosamine-3-kinase
089e4e5886235a3638d339cf4837ad8b	ABC_transporter_related
08a3d213f759f78687e243ea8aa255c4	putative_lipoprotein
08a80a41fc782f398b8781be3e6c10d3	branched-chain_alpha-keto_acid_dehydrogenase_E1_component
08a8506a42221a3862552113a02e94e5	tail_sheath_protein
08a8a51fa5ad3fbaf2c06e6e3d3e8b9a	tRNA_modification_GTPase_TrmE
08aa35a0bace87f3634aa8c68b52d5bf	preprotein_translocase_SecA_subunit
08aac35bcc474a31f6f498d00dd1e1b2	UBA-THIF-type_NAD-FAD_binding_protein
08ab1b6438f84357ef351a5d6eb47bba	glycosyl_transferase_protein
08ae1c72779427d0f368a98a6eacf29b	hypothetical_protein
08affe64b1850689eb3edbd8346c1cbb	ketol-acid_reductoisomerase
08b4c05e626f9f864a03205d20a5db74	putative_lipid_metabolism-related_protein
08b7177dc13220c253d882d16e245b3a	ABC_transporter_related
08baf977e906c3999b87e13cfeb445af	two-component_sensor_protein
08bc3eab3aa302000ced444873986e9c	tRNA_5-methylaminomethyl-2-thiouridylate-methyltransferase
08be48f91b3b4204d7d9ea0afd723694	hypothetical_protein
08bff5b1dec3ca0d5fb9c1ef57e7151a	heat_shock_protein_Hsp20
08c08749a8dfa70cfe71f93a7ed65055	integral_membrane_protein
08c1f7bab11d50f578d0a146273bd8fe	CHAD_domain_containing_protein
08c91e7f0eabb6e52a4855bd9dfc33d3	50S_ribosomal_protein_L1
08c9e66a7f3a6e20af79c6c8e3027f5c	glucose-6-phosphate_1-dehydrogenase
08cd1622ccfadeb27b1498cf6c98254e	alkyl_hydroperoxide_reductase-_Thiol_specific_antioxidant-_Mal_allergen
08cfd5470e861a0afb0a0fef6784dff2	succinyl-CoA_synthetase_subunit_beta
08d16408662dd5ee16fed19f733c4e55	putative_ABC_transporter_permease_protein
08d2a552f300d29cf8adf850658047ab	LacI_family_transcription_regulator
08d538f240c894114ee086d3d3e29fdb	trehalose_synthase
08dabcab4f1116a327c4a5c2e31df8a3	34-dihydroxyphenylacetate_23-dioxygenase
08e165e3b82154ccb6612eadcf634008	putative_pseudouridine_synthase_RsuRNA-binding_S4pseudouridine_synthase
08eff5e65f4bfac7bdea9ae174a4cb9a	NADP_transhydrogenase_subunit_beta
08f09e906221022c86dc35321c399524	hypothetical_protein
08f3c7fa398719c793e746d11e52c1c4	acyl-CoA_dehydrogenase_domain-containing_protein
08f6a1b56b6afe0085cac0bc6114027c	aminoacylase-2-carboxypeptidase-Z_family_hydrolase
08f6e072981ecbf640cb4dfc11c0e2b8	O-acetylhomoserine_aminocarboxypropyltransferase
08f70cec04b92e48bd21e4c63cf393fa	deoxyhypusine_synthase
08f8df97811c6839bb057027585e98c7	30S_ribosomal_protein_S32
08f8f01699a7bbcd6d2b06d949dd4646	intracellular_septation_protein_A
08fad81558db35d6e30a8fdea5cb7192	peptidase_S9_prolyl_oligopeptidase
0900a6facae8bf414d738335f2ff4b83	folate-binding_protein_YgfZ
0900b7d72b695b937a5f97868f825976	proton-translocating_NADH-quinone_oxidoreductase_chain_M
09067d1098f91f5d65a253622fd5d374	multi-sensor_signal_transduction_histidine_kinase
090d30c1edbe87c981010948d5e4ff49	Disulfide_bond_formation_protein_DsbB
090dab01a9754203521c590addc5d904	MltA-interacting_MipA_family_protein
091210178a98521b6bbb87166a69355a	polysaccharide_biosynthesis
0914d4954e3817aa6243d8f1f7f42849	regulatory_protein_GntR_HTH
0915d5a7314cf5659c7c3e784f443ca9	group_II_intron-encoding_maturase
091a153b0bfd5d866899803322576073	hypothetical_protein
09241c3bf123bd2799d27e057f9a3dff	hypothetical_protein
092421c072d71df89920140d2f8519cd	acetoin_utilization_family_protein
092515f74eb41386b2f4158ef8d1dd67	phosphate_ABC_transporter_periplasmic_phosphate-binding_protein
09263ff57bede975d95c3ec9b1a601fd	Electron-transferring-flavoprotein_dehydrogenase
092640e6fa73b16b3c6f25afdbd9efe1	ferredoxin
092b31225155aca9761fbc853fcaac39	amidohydrolase
092e57885267bf91fb3b134d0fa715ee	Putative_N-acetyl-glucosamine_transferase
092fcb32c27efeee3c9b24ffd77ecd70	TonB-dependent_receptor_plug
09343e6fc55a0be038510a24332fb68d	protein_serine-threonine_phosphatase
0935a05e39c75077d01031b8527f716b	chorismate_synthase
0939e626a3777c5b45ab275b57806f74	oxidoreductase_domain-containing_protein
093bb70b165eac52c5822d504b6fd41a	Uncharacterized_protein_family_UPF0027
093cc0d71ca691ef3dc01df49d3eef9b	glycolate_reductase
093ff8c392fd1e8124dcabd770fb6a23	binding-protein-dependent_transport_systems_inner_membrane_component
0945052f117ddf28796b7cbcc8fac931	transcriptional_regulator
0947452fff0a06c1cd686ce9f65a730d	sodium-hydrogen_exchanger
094c82319f0a808609c53324890cc131	polysaccharide_lyase
094fe4f34acf7c934b2243e668ad23a0	glutamyl-tRNAgln_amidotransferase_subunit_A
0952d0d007d5e22157e50f5e6e4e4afa	membrane_protein_of_unknown_function
0955a3ccb4981e3571d0e39e9719f811	NADH-ubiquinone_oxidoreductase_NQO1_subunit
0957d6d64299e2da9db106d7b770245b	imidazole_glycerol_phosphate_synthase_subunit_HisF
095a1bea585dff1ce3bacad4e1322908	phenylacetate-CoA_oxygenase_subunit_PaaA
095c4f52329507544f56590d50998668	putative_phage_repressor
096644ece92c869c59222398d823eebf	HSP20_family_protein
096debd8e325d86860724fe31c4232ae	F0F1_ATP_synthase_subunit_alpha
096f314cf7a8e98e59a91d65d4747545	periplasmic_beta-glucosidase
096f736f4b3bf669acc1280d61728d05	peptide_chain_release_factor_2
0970fb6618cb0e2d2750638bad4717bd	serine-threonine_kinase_family_protein
09739dbd1212a4be9e19c70f14f6bbf6	50S_ribosomal_protein_L11
0973ab9c32476c68e786f6578b180c07	Serine_O-acetyltransferase
09766f9469b763bcea48f6f7b1175010	Shikimate_kinase_3-dehydroquinate_synthase
097879c92c4ce5d3d7f8ed9738559a03	acetolactate_synthase
097897e3ae1a388c00354ca8d062ba47	two_component_sigma54_specific_transcriptional_regulator_Fis_family
097c2667646aa879e8879a78b3ceffc5	L-rhamnose_isomerase
0980f08f53fc1c36cd531084298bc3d7	phytanoyl-CoA_dioxygenase
0985ff753960fe9f61c8d1114ec6677b	CoA-binding_protein
098f5fd612a660de225d8e5ffa5ee9bd	beta-glucosidase
0991fc343545b1078f6a4394b6d45902	hypothetical_protein
09946c24b732d0e55b5dbd664b62341d	hypothetical_protein
0999552f953d80d2ab1954969010b2bf	inner-membrane_translocator
099b382b75fff6c928677cfbfa30f20f	twitching_motility_protein
099ebd7f0f471a3db1228d7aff832157	nitrate_ABC_transporter_inner_membrane_subunit
099f4b567e0afe4716a47eff04a107d5	chorismate_synthase
099fbffca30ef83df840d1b78b32408d	ATPase_component_of_ABC-type_sulfonate-nitrate-taurine_transport_system
09a7ade535967e9da1aef74cce37ec39	hypothetical_protein
09a80f6a876f4169f18a41a38635501c	thioesterase_superfamily_protein
09a848b8081b1b05c020dec33fcbeef9	elongation_factor_EF-2
09a9ad115fb1f97f06923152d290a860	hypothetical_protein
09ab62a14fb4bb4fdc3ac42353d487b0	sigma-70_region_2_domain-containing_protein
09ac2e0a3e94738274280db92212855b	Serine-type_D-Ala-D-Ala_carboxypeptidase
09b20e651373138d3870e704146a4833	Fe-S_oxidoreductase_ferredoxin
09b2418b9e700f1dc3b50d192b5c679d	hypothetical_protein
09b6892a9b7450bde14e0103f292d2db	M6_family_metalloprotease_domain_protein
09c33b304281f2beee47391a9aec4f63	putative_Manganese_transport_protein_mntH
09c5fa772ca6069df2910d394ead5892	hemimethylated_DNA_binding_protein
09c9cf7c0a1e31eefcf634256c05aa8f	crossover_junction_endodeoxyribonuclease_RuvC
09ca166701d5a96788ada410561229a9	peptidase_T
09ce2c8a39c986557a632f7e981ad494	2-isopropylmalate_synthase
09d036d4ff1d0fa4e2adff97a7e88ee0	UDP-3-O-3-hydroxymyristoyl_N-acetylglucosamine_deacetylase
09da6f116a6bc359fa04abcf6ff40dd4	potassium-translocating_P-type_ATPase_B_subunit
09db734da5bbc81f80e6d0dcead7b75a	methyltransferase_type_11
09dd6a59b498f048fd7223cb16c4ead2	sugar_kinase
09e0ebab512172b23e7b70ac5acc90cb	AAA_ATPase_central_region
09e32195799e9dc490b71e6e97e15b48	virulence_factor
09e694087c20fae9156e7e671ceea442	aldehyde_oxidase_and_xanthine_dehydrogenase_molybdopterin_binding
09e91fe6224e8b7e24de4097c6b0c316	hypothetical_protein
09ebfaa90ede2a01693100ba71198483	cytochrome_b-b6_domain-containing_protein
09ec8e529e9488e5588a9fbe65abbb24	serine_hydroxymethyltransferase
09ed4e311308ada2f6222545b4a84b3e	ABC_transporter_permease_protein
09f324be09f460011ab0c8ac5a6dff3a	GCN5-related_N-acetyltransferase
09f3996a99c4115b836f2da01f534164	aldehyde_oxidase_and_xanthine_dehydrogenase_molybdopterin_binding
09f45aa6d2c6e872e52f12a4283491a9	hypothetical_protein
09fba1556e8b6b81f2c0654da62b13a8	DNA_gyrase_A_subunit
09fbd858e30b16b9031e851fd80416e3	FG-GAP_repeat-containing_protein
09fbf38278693d3c8834f6a9aac5f3c9	cell_division_protein_FtsI
09fdb64ef409bbe6ac3c74d4b8398cd8	GTP-binding_protein_LepA
0a0124636b2b813369f27acfd6272e37	DEAD-DEAH_box_helicase_domain_protein
0a04580152b999474c78ca0520b9ea53	hypothetical_protein
0a076341f38ffbe8f54eb9db8416ff7b	formate--tetrahydrofolate_ligase
0a0818489a42e5322c6648891de4f2b7	hydro-lyase_Fe-S_type_tartrate-fumarate_subfamily_beta_subunit
0a0b2db094e10c1785f3494781c1c208	ATPase_central_domain-containing_protein
0a0f697ed4fced53bd900d21f6390238	arginine_biosynthesis_bifunctional_protein_ArgJ
0a11e617e0b3f3c16fd30d421fc493b9	ribulose-5-phosphate_3-epimerase
0a1348fb34703fa6f350b41c38fb7e82	nitrogen_regulation_protein_NtrX
0a13d2976dfdbf9c1a74ab85816dacdb	hypothetical_protein
0a15663cd1bb4be5f3404f7b26cff03d	ABC-2_type_transporter
0a16a4be09199bcada59aaa20287c121	xylose_isomerase_domain-containing_protein
0a1b3055ca4c31e0d438609cf3ef2b51	Aminobutyraldehyde_dehydrogenase
0a1b9433c08b0f4efc2975d5ea64b9cb	AMP-dependent_synthetase_and_ligase
0a1ce05905da8e685ec7c5806542fc97	peptidase_M48_Ste24p
0a1d980c683886560add9768b05c8efe	putative_secreted_endoglucanase
0a1fc07efb47d7087ce9c686685adeb6	ATPase
0a220c8469a08fa92aa2647fff007d37	orotidine_5-phosphate_decarboxylase_putative
0a23b3da00d327b5631a22a959330ae2	urease_accessory_protein_UreG
0a24e6ad072b253c3a0efb7dfc9082c3	putative_Tfp_pilus_assembly_protein_tip-associated_adhesin_PilY1
0a283b052b27f53a4ea149bf4b55cbd6	D-amino-acid_dehydrogenase
0a2b2dc0e2172484eb6ff73632caca1c	AMP-dependent_synthetase_and_ligase
0a31afe1b21471bc5184f3b67fee4b3d	hypothetical_protein
0a32a9a0cbc332aad478da7126ea0b83	protein_of_unknown_function_UPF0182
0a32f042e5416ef1bbc7b929a5107148	hypothetical_protein
0a333aad234845ff439b30d2c2220b40	cell_division_protein_FtsI-penicillin-binding_protein_2-like_protein
0a35f4c0e2fcac52439dc4cd663417cf	cytochrome_c3
0a371a083f0a3f2234643924512050b7	nitroreductase
0a37224b2682a430deb378e2d793affc	Radical_SAM_domain_protein
0a397cd9bed7d5375150c2fcc81f497a	dihydropteroate_synthase
0a39a8bd501624c0453f0ba9ad93e028	ABC_transporter_related_protein
0a3c24a48145de6cbda7919cd2b60657	Excinuclease_ABC_A_subunit
0a3dacff9f02b85c86e0edf6c1a0a403	chaperonin_GroEL
0a3de21911a32ab9e93f16c0c6f9afb0	glycoside_hydrolase_family_16
0a3ed0f3ca8627366ec0c6e0a10cd63c	GntR_family_transcriptional_regulator
0a3ef50ca1a765edca209cfd7533d4b0	DNA_topoisomerase
0a41e47a29a966a431084fbd709dd563	polyphosphate_kinase
0a42406eed5f585a79dbbb662d017856	glutamine_synthetase
0a44a633d76fb844d9727a2af5dc2bbf	AraC_family_transcriptional_regulator
0a44c5b798a0feab17309aa04ce8a341	cation-transporting_ATPase_E1-E2_family
0a483ab68b9ea121550d26e0148a9c08	34-dihydroxy-2-butanone_4-phosphate_synthase
0a4b94c96893d4fcf46a9585e6abfb0f	alcohol_dehydrogenase
0a4dd0030c50d8de4e977f8bd5e52630	hypothetical_protein
0a5474997693c905440a67a4f9740814	hypothetical_protein
0a56dd1d4cd93f822404958c6fe7b92f	50S_ribosomal_subunit_protein_L5
0a58be3d108ba7748524d81209968189	transcriptional_regulator
0a5cb2221fbe4bb56127d3b1dd1b7749	Phosphoketolase
0a5f0bbfe9dcb512ec5199686c8fa459	ribonucleoprotein-like
0a65f6ba48aa6b5f2e0a201713e34a05	alcohol_dehydrogenase
0a6f32428e9e4c19ddb5efbedb2519d9	Electron-transferring-flavoprotein_dehydrogenase
0a72659b433acb10a789c489fb174175	hypothetical_protein
0a7a389d42de520c1b0baf329c55e81c	asparaginyl-tRNA_synthetase
0a7a6546ee6322c3096f286d1b6c5c03	S-adenosylmethionine_synthetase
0a7b62610d506f74e42aa6432147b165	leucyl-tRNA_synthetase
0a7c7282fa1bc18d151926808efd3f9b	anti-sigma-factor_antagonist
0a7d0c035400aaae75fee93600437af9	phosphomannomutase
0a7dfedcecd296a2de6f8f6aa13cafa0	peptidase_S45_penicillin_amidase
0a7f7f06e9d0b4ef3b96adca0321a531	RNA_helicase_dead
0a805bfc3afa1cb8b32448472f6aad93	putative_aminotransferase
0a8060551de6349b3a041832fb8d3525	hypothetical_protein
0a80c28ae342e373396d5ca7fdc7d81c	oxidoreductase
0a87bec3b0953abd836724686db84193	Precorrin-4_C11-methyltransferase
0a931d5442a70cbbbe8ec0c782061bb1	4-oxalomesaconate_hydratase
0a948d79a06e139aff94d7cc2b0b3ab4	dihydropteroate_synthase
0a9800fb5bc422c09589280468568414	glutamate_synthase_NADH_large_subunit
0a995ff1e4300a1976580eab75c67f89	phosphomannomutase
0a99c2b7ec9e2fa0ce7233e3035d51f3	ABC_transporter_ATP-binding_protein
0a9c39f09492563b9b2c281974b2eb6e	hypothetical_protein
0a9c8e6dc188350f892ca7b5bdeeb057	carbohydrate_kinase_PfkB
0aa0b0a0f17597647cdb1941cd877a7f	hypothetical_protein
0aa1a06d26ec1ebbd8d4e51eec602eae	extracellular_solute-binding_protein
0aa48de67b7790f42032d745e482776c	hypothetical_protein
0aa83f7c5e4a8ca636e517fbfec73be4	hypothetical_protein
0aa8b53361926b5a5770ce27331ab74a	enoyl-CoA_hydratase-isomerase
0aad7ba06105a2ca22ce8b7440250718	chaperone_protein_DnaK
0aadef5de324a66d394ceea08dfe7853	NADH-quinone_oxidoreductase_B_subunit
0aaede0c840511cb42142f7adf0ac622	Short-chain_dehydrogenase-reductase_SDR
0aafae91b987a81f75c32d36939c25d4	tRNA-hydroxylase
0ab0fcebb2c3c6a703f7f8b5f451ae24	lipid-A-disaccharide_synthase
0ab26d250961ca64240a5df0cbac726e	FeS_assembly_protein_SufB
0ab2adf907f19f99d90baa8ca90f5dbb	hypothetical_protein
0ab2da6fe4c3f73bc09bac05573a8c61	sulfate_transporter
0ab784ef170233299cd1fe72a9588f4a	pilus_MSHA_type_biogenesis_protein_MshL
0ab7d4f31cf11b62611e042216ef4d01	threonine_synthase
0ad5b71963577fb567266c0cc4ad6f7b	putative_sodiumalanine_symporter
0aed8c03f7ab2aae161e8930f966b7a5	ABC_transporter-like_protein
0aee32e715846480fd9e5a74818388a7	pilus_assembly_protein
0aeed5144856966d68e4a0c6138acfef	membrane_protein
0af36b7381cca2e0e213d1a1d11ef329	naphthoate_synthase
0af3e93dec3f2c8e3e87c8812bf05048	pucr_family_transcriptional_regulator
0af42d36549124498b6464caaf2f9732	multi-sensor_hybrid_histidine_kinase
0af5e2d317bb647719312f8b96484b1b	glycine_dehydrogenase_subunit_1
0af91877b99f299ee04c11fb11094c0b	WD_repeat-containing_protein
0af937ca059341d47c7c9107470980a8	Uracil_phosphoribosyltransferase
0afbe0a9e2dd97ca664f40d4cba400bf	Alcohol_dehydrogenase_zinc-binding_domain_protein
0afe63f81153f77d4cc0a0b965e19404	ISDet3_transposase_orfA
0affd200e97ea6b4e82deef05ed39d20	GCN5-related_N-acetyltransferase
0b0172084ebfa8a303473d6638582188	PAS-PAC_sensor_hybrid_histidine_kinase
0b04753b2f5bab3a1a132b851ed52b72	cobinamide_kinase_-_conamide_phosphate_guanylyltransferase
0b0639a360a4ef44f09cf85b966daab8	hypothetical_protein
0b06e58022e6c149afb3447b797219f1	drug-resistance_pump
0b08f1df307100a3cf30c5be4064b02c	CoA-transferase_family_III_family_protein_18
0b0a6646444866f973255d41967ad861	acyl-CoA_dehydrogenase
0b0a72f17a1c31baa92a1264300ecda1	hypothetical_protein
0b0c7c974e4c765adabdd5913ebc239d	tryptophan_23-dioxygenase
0b11be6f15067a0ed036b63f66c8f573	short-chain_dehydrogenase-reductase_SDR
0b13be56accad89b4d33167f1acd13a6	thioldisulfide_interchange_protein_dsbD_putative
0b19d01d6f12abc7b3e9099bbdf975af	histidine_kinase
0b1b5bb010b591991eb3485aadb64cb4	protein_of_unknown_function_DUF1801
0b1bfd8e0681c6f51e0cc211430f84ae	hypothetical_protein
0b1ca69f752a280175f0f42952da1bf0	NAD-dependent_epimerase-dehydratase
0b1cc19ff0dc74bde5387e15081d56af	DNA_gyrase_subunit_A
0b1dd2b65a8d7a3c1c7ea3996a9aa71d	pyruvate_dehydrogenase_acetyl-transferring
0b2026299eb3c0d68eeebdd531f1719c	ABC_transporter_ATPase_subunit
0b20ea65e21d97f947dfb271b15a35f7	FAD_dependent_oxidoreductase
0b2204029603b96b9b373af313ebc016	putative_signal_peptide
0b235bc1077273fb898a7148f728a9c9	S-adenosylmethionine_synthetase
0b23895c1cd19771fd41b41210094ec7	acriflavin_resistance_protein
0b2a932867208de793b213d6d271ea5f	sodium-hydrogen_exchanger_family_protein
0b2b02342a2b96a92f635a32814f2ecc	acetyl-coenzyme_A_synthetase
0b2dba08f4ba3dde199cbacabbbe2db3	phytanoyl-CoA_dioxygenase_family_protein
0b2f20b18465c6ffa32bbf7778b8917a	DNA-directed_RNA_polymerase_subunit_beta
0b372a8faf04365cb6d0852b91ec3f38	hypothetical_protein
0b3811e426d0504984fd41d4e6ba6a73	hypothetical_protein
0b38170195293de088462ce125f591b4	isocitrate_lyase
0b42a3cae31861c09f41b73d9669d8a5	carboxylase
0b443386fe9613beaa449d3fffa38a5a	protein_of_unknown_function_DUF344
0b470c8e74572a503a24aa25482b07b8	Cupin_2_conserved_barrel_domain_protein
0b4a374aa47f32780e8d8a8ca0e5f48c	glycosyl_transferase_group_1
0b4aa111cf01aa13ad1756588b15530d	Radical_SAM_domain_protein
0b4bc939b4c6996a4db0f8ff93397987	glycine_dehydrogenase_subunit_1
0b4cfa8fe084095ad41c18b89c3f3abb	acyl-CoA_dehydrogenase_domain-containing_protein
0b4fb26c27311bfe48fee675b7be6117	NADH-quinone_oxidoreductase_subunit_G
0b518bc2e413b80985068ad8464d9fd0	AMP-dependent_synthetase_and_ligase
0b534bfcc21b840c0511590315828128	hypothetical_protein
0b53df6147b31cfa3dadb90957b2dc13	two-component_system_response_regulator
0b540620142bbecf7c415f7f69dd96e7	glycosyl_transferase_group_1
0b567cbeb889d6acb57d2eaf0913a73c	putative_two-component_sensor_protein
0b59409276439e1f467d98d4417b0abd	hypothetical_protein
0b5c0487d54ed6311c343ff2771b314b	deoxyguanosinetriphosphate_triphosphohydrolase
0b5d8bc6746e0440c21c7a2cd12e98d7	argininosuccinate_lyase
0b6089cec19ecfd356cd4f73c9033afe	putative_glutathione_S-transferase-related_protein
0b608d2050dd922f6ff1465780bec02d	GTP-binding_protein_LepA
0b641a0360f1193d1f119561a2e49727	DNA_helicase_II
0b653c06a527b0143e752029d2dbafff	binding-protein-dependent_transport_systems_inner_membrane_component
0b682d85858b014ab646f6ba61d670af	acriflavin_resistance_protein
0b69e89e32327c552369520171b8ce12	peptidase_S9A-B-C_family_catalytic_domain_protein
0b6d92e9ce4443219632cd8761e277fc	hypothetical_protein
0b6ef010680df99f9b8e935b183c79a0	CTP_synthetase
0b71e33efdf1188aef7a81b6dccc3964	formyltetrahydrofolate_deformylase_puru
0b7220ba2a15edea31130baec2494f04	ATPase_AAA-2_domain_protein
0b737a22b0170e51e1c1e4e549df641b	DNA-directed_RNA_polymerase_subunit_beta
0b739c132a890e206f8a5ee12e9576d2	Multimeric_flavodoxin_WrbA
0b7a440ca5bdc341cbd961b9309174a7	methionine_synthase
0b7b05abbf520c9597770697211d19f0	rhs-related_protein
0b7d505e3dedba003e6d0e3506df3e91	ammonium_transporter
0b80382d6f8f580a13696f408966e043	cysteine_desulfurase
0b80d395fa979e93b0d7f28679ae01c0	hypothetical_protein
0b85e200e664354d39d16b1682cf1a88	hypothetical_protein
0b86b89dc1a825b1411b0782014d6200	O-acetylhomoserine-O-acetylserine_sulfhydrylase
0b87d905e1b364f13568a0a92f1ee41e	oligopeptidase_B
0b887c5ae7cb7ca5f84b84b2b9109035	PfkB_domain-containing_protein
0b8a1a1da515f0257deaad741504789d	adenosine_deaminase
0b93d419d1601947eab33f46fb1a1f67	AMP-dependent_synthetase_and_ligase
0b989aaef401e1dd3a9b70d852b485f3	Radical_SAM_domain_protein
0b99227d78d5d420b67cf4d458ee362f	hypothetical_protein
0b9c57522bd1f72b806e9e292699a60d	hypothetical_protein
0b9d501c60c57dba1f6dbced179594b2	lytic_murein_transglycosylase
0ba0954e46c2d72948a9fa5f8e8b6a66	PhoH_family_protein
0ba0c54791d912c512e054fbc85c2023	fructose-16-bisphosphate_aldolase
0ba130ca2d74a33c54457ffd72a63c13	putative_dehydrogenase
0ba1e2106fd7d64bff2e78d7e0d64cd4	30S_ribosomal_protein_S5
0ba20c766662a58ba31b0e5be850cf0c	MbtH_domain-containing_protein
0ba31a0d4ecd7eae3a647003937d67ba	acyl-CoA_dehydrogenase
0ba35fbc14369af36ac3ff21c7d752d5	amino_acid_permease-associated_region
0ba7ca5ad50263127795e4ac0c4a1801	putative_ABC_transporter_ATP-binding_protein
0bab794fbeaa856369fb1102b371fdca	hypothetical_protein
0bab9a73003cc03924b2b189bb52c72f	beta-lactamase_domain_protein
0bad9a6dc5176a5dc2fea857f0f86ae7	glutamate-cysteine_ligase
0bafb13c97d17f4a613eedc7cf89d2f7	pyruvate_carboxyltransferase
0bb0ad5a8b51147672b6befeaa94bde3	alpha-beta_hydrolase_fold
0bb38a32caaae2419e6c2a2e6262ace6	S-adenosyl-methyltransferase_MraW
0bb4545519eb8932d82b220cd439fae3	NAD-dependent_epimerase-dehydratase
0bba56593b945809717a039b97446872	twitching_motility_protein
0bc2f6c5294e7092a28f1577e921a2e7	hypothetical_protein
0bc4426d639e5f092e80d4f7bfb4aad6	flagellin_protein
0bc49ec0a0c074af056c02fac33a55ab	tRNAm5U-54_methyltransferase
0bc4ccf63669ed03c8085914eda8eead	transposase_IS116-IS110-IS902
0bcd979f3018a6db85e974a5172115fd	sensory_transduction_histidine_kinase
0bcdbcf7ae72c73d14383c71180dd0cc	pyruvate_dehydrogenase_E1_component_protein
0bcf5f87e169d6ba053f1a8a28d09236	preprotein_translocase_subunit_SecF
0bd02975b47dbdfb36165fc7c8794dbd	hypothetical_protein
0bd0428a20e37f21b42589371e9ae629	transposase_IS111A-IS1328-IS1533
0bd04a0d82fb01b4693515739804056e	putative_ABC_transporter_ATP-binding_protein
0bde0f0369bd67b3d9d25f1ef7710904	ribulose-phosphate_3-epimerase
0bdeb67aa331bdb75f51d4a1553be35c	molecular_chaperone_DnaK
0bdecacf9ba7f0eb62ef1835d22693eb	polyphosphate_kinase
0be1cd9a8732f3d62e54904fd4062586	pantetheine-phosphate_adenylyltransferase
0be36d6ab0476ad65cbb564941b39b37	3-dehydroquinate_synthase
0be690b31b8aa11c0d232380a82992fd	dTDP-glucose_4-6-dehydratase
0be7cfb09bdaa0a9dba773606d743471	hypothetical_protein
0be97564379d16bb9c6662b0530ed15e	ornithine_decarboxylase
0bee693bc183f67924a53448ca317d1b	phosphoglucomutase
0bf6f7a3ba4ce750494cd6413b7b537a	aldehyde_oxidase_and_xanthine_dehydrogenase_molybdopterin_binding_protein
0bf8af5fda7d252482934c9b98ada006	F0F1_ATP_synthase_subunit_alpha
0bfc07fdc7b2bb4abeb7045676ebd44d	tRNA_delta2-isopentenylpyrophosphate_transferase
0bfdf3e244594a3cb7c30e88ea6090f2	major_facilitator_transporter
0c00f3a479a0e619e4697642d373f95b	ribonuclease_PH
0c012727bf6b3a214a3e149913b6bc9a	putative_ATP-dependent_helicase
0c0164ec49374d2489c9dd7a06b6889b	transcriptional_regulator_NrdR
0c0575cb69cb4575db8f280ec5cd5d5d	excinuclease_ABC_A_subunit
0c064102e3a1cb09b56115bf49d5b304	ribonuclease_h
0c0ec18fd8eeba5b8ab9ff182644a193	isochorismatase_hydrolase
0c145a0efc21a6ac6a7b72c3401773ef	putative_hybrid_histidine_kinase_Domains_two_PAS_two_PAC_His_KinaseA_ATPase_and_two_REC_CheY-like
0c1588b4be73539124dd89a6f93009b5	Methenyltetrahydrofolate_cyclohydrolase
0c16a82e36db7292aea9f218c975ef55	alpha-glucosidase
0c17818627fa990c1ac76d259b6f110a	L-threonine_3-dehydrogenase
0c194df5fd130f37543e4f9043fc0e92	hypothetical_protein
0c1a63e93a37597ee31bcc2381222048	luciferase_family_protein
0c1de8acc856389b53df135ab2dbe231	hypothetical_protein
0c1e63bc8a5784aa27c86b956a786d4f	phosphoribosylformylglycinamidine_cyclo-ligase
0c2682e0daf8ed46a1c3de0690a80252	AMP-dependent_synthetase_and_ligase
0c2aff9507727ff822649c1ebe3d9b0c	sulfate-thiosulfate_abc_transporter_substrate_binding_lipoprotein_cysp1
0c2df86b00a4986d7c947702c10f25f3	hypothetical_protein
0c3209be8cc66ee30f003a2dbe9d04e7	DNA-pantothenate_metabolism_flavoprotein
0c3392ac6365a9edca58a731af9f9bc2	serine_protease
0c368309b3f8f4b409319653f6b7e6c1	glycine_dehydrogenase
0c39af3f79f8b34a2ac3689f5c345e31	DSBH_domain-containing_protein
0c3a4a0d842504e2004aeac59f63188b	hypothetical_protein
0c3eb5ece2b6a550d2be124e016dffb9	S-adenosyl-L-homocysteine_hydrolase
0c3fa63df75c0355b3dfb30a51f9d274	glycosyl_transferase_family_39
0c40378bca0c6689090b2040b07588be	glycosyl_hydrolase_family_32_protein
0c43a6f0167500e10548b23656480c7e	cyclic_nucleotide-binding_protein
0c4528744055c57e7b82ade0939928df	probable_acyl-CoA_dehydrogenase
0c4fa50b47dac0878854205646921b45	polynucleotide_phosphorylase-polyadenylase
0c504ffee96dbc9d1e09ad7a945c086e	transcriptional_regulator_NifA_subfamily_Fis_Family
0c532884d66cfc3787e1746006b7599f	HflC_protein
0c544e2e0d4c4b9dfa8a91eaf5ac6447	PhoH_family_protein
0c56a904f46bf095b2e4720ba783dbd0	glucose-1-phosphate_adenylyltransferase
0c59b290269cb24d1ad7665081e5135b	trehalose_synthase
0c5a815233cf85face866476a3ada1c0	acriflavin_resistance_protein
0c5c8d902369830a15720bc97133a67d	Aas_bifunctional_protein
0c5f6dba24981710cc359e64dea6b07b	rhodopirellula_transposase
0c605cab895f2f410dc2c34f950f8810	acetylglutamate_kinase
0c646740a3e2ca5f02afd1db2966b6ed	glycosyl_transferase_family_2
0c64eac4e3573718dda528f4b55545be	putative_transmembrane_protein
0c66a803d69831d66f0c86fdaee852f6	DNA-directed_RNA_polymerase_beta_subunit
0c67266842b741ac8dfe90e4ef5e9b95	N-acetylglucosaminyl-phosphatidylinositol_biosynthetic_protein_Spt14
0c6abb0c49feddde8fe02c8c21fae55c	binding-protein-dependent_transport_systems_inner_membrane_component
0c6f70f961a250a21f6175c06d233b24	glycogen-starch-alpha-glucan_phosphorylase
0c6f9a8769fd161334ccab78eab2b5fe	ATPase_with_chaperone_activity_ATP-binding_subunit
0c73fd4fa5f6834a130feb66cfd652cb	ABC_transporter_related-protein
0c762115ebdcaaff11c227e02a28ea70	ABC_transporter-like_protein
0c7b2fba413750137c78d8ca8dae24bf	nucleoside_diphosphate_kinase
0c804546854099edc36b89a8950a2595	cytochrome_bd-quinol_oxidase_subunit_I
0c839fd6ec2dc903e44ea993cc906989	ribonucleotide-diphosphate_reductase_subunit_beta
0c87c2ffe94591728a3da7233b35d86e	Prolyl_oligopeptidase
0c8800ddebc0d27d0617b38dafc852ff	Undecaprenyl-phosphate_galactose_phosphotransferase
0c88541311d6386cd3669157261c3033	acetyl-CoA_acetyltransferase
0c8c0ab8c3e7afdfd12e9c3768c95179	TRAP_transporter_4TM-12TM_fusion_family_protein_2
0c8d27d4668423543803e9dbedf7f97d	3-deoxy-D-arabinoheptulosonate-7-phosphate_synthase
0c91792d72ae32598fc9112168994c68	50S_ribosomal_protein_L11
0c91eb88d29c589c4648f54381885181	2-nitropropane_dioxygenase_NPD
0c95b8830dffb0332762f7aa2c9c0d34	PilT_domain-containing_protein
0c9676e87786d60b9cccee9a3bc42c82	hypothetical_protein
0c96bdb27901140f658b33f4d9ab8ded	GTP-binding_protein_YchF
0c9c7d79afe6c148c1df4054b7a42d3a	4-hydroxyphenylpyruvate_dioxygenase
0c9da528ae724c32ef82ccc8d9dea274	putative_Mitogen-activated_protein_kinase_kinase_kinase
0ca2c5d33a21ee0cafb63c29492dd994	hypothetical_protein
0ca335b1fd3391123e84e6d03090fb49	acetoin_dehydrogenase_E1_component_alpha_subunit
0ca387ad1b4e4eddf2c89e033c76f9e4	hypothetical_protein
0ca690c306761b6c3509beafe75740f4	Kup2
0caa02ce02b3c8bf178d6bdb44a1fb7c	gamma-glutamyl_phosphate_reductase
0cac387870a21c452c487b37c3529679	NADH_dehydrogenase_quinone
0cac59411ee40701b6bbf21df663923b	preprotein_translocase_SecA_subunit
0cae70cff670cc600d00156bc5a5cf09	proline_racemase
0cb10ee1ea5addbbdd95ae44378009d1	signal_recognition_particle_protein
0cb214585446f2259fe461d278f02bae	ornithine_decarboxylase
0cb25ce8e6f34b73dbafd393eeb0e440	hypothetical_protein
0cb582f6967e13a421f10373959029c2	short-chain_dehydrogenase-reductase_SDR
0cb59e71fd4872b6a383a27f73fb5ac0	phosphoribosylformylglycinamidine_synthase_II
0cb6022448732d1ac051d4ff913f7270	RNA_polymerase_sigma-24_subunit_ECF_subfamily
0cbc7626ca660cad4872460f298f815b	hypothetical_protein
0cbcefa07e6ddbfb31eb40c9d9c452d9	beta-lactamase_domain_protein
0cbd31f29f2d5c0647d2bc68a4cc93d7	replicative_DNA_helicase
0cbe5adf57f0ad96a1dfb08b09e42098	diguanylate_cyclase-phosphodiesterase
0cc65c33c71826b8b2ebdd45541d58e0	general_secretion_pathway_protein_F
0cc6c403e814a991eac5581e47d3c6f0	squalene_synthase_HpnD
0cc9494e35febde50c5af54b56e23fe8	amidase_hydantoinase-carbamoylase_family
0cc9c8bea241ce9a4df27fd649ddfd6a	pyridoxine_5-phosphate_synthase
0cc9d67c0c28c24a402c3d5d5bbd17c9	cytochrome-c_oxidase
0ccc5c5d997c01a6b94830a4c4ac66c5	Fis_family_transcriptional_regulator
0ccec5fd8a4bffb395a36cc8f8507da0	type_II_secretion_system_F_domain-containing_protein
0cdccb70f9e9d469299cc9774bf5193a	probable_serine-threonine_protein_kinase
0cdfa78ae46979cc9eda3d162b62239a	3-dehydroquinate_dehydratase
0ce23174584ae2a68c800906d4fc8c03	amino_acid-binding_ACT_domain-containing_protein
0ce9393870999c58fb1cd427f48de260	AMP-dependent_synthetase_and_ligase
0ced23f404d7d15378bc793a5d860985	two_component_sigma54_specific_transcriptional_regulator_Fis_family
0cedf1d76327ecbf7a41c100c282f789	GCN5-related_N-acetyltransferase
0ceeb01e6823fdd69484adf668450c4a	major_facilitator_superfamily_protein
0cf0d6b64509fb15d2f05bd8aebd3d67	histidyl-tRNA_synthetase
0cf1677f0192babdb402bbb96c98e6cf	multi-sensor_hybrid_histidine_kinase
0cfd6b63aee0aacbd5feffedfee020de	hypothetical_protein
0cff41ba9fd88149bf5c0e5b49e5985d	transcriptional_regulator_NifA_subfamily_Fis_Family
0d06f1aa4be49dd634dcb66b09326142	malic_enzyme
0d081b72ce0cc53557d07868468a9d52	hypothetical_protein
0d0cc986892232a3a232ba19a595b567	hypothetical_protein
0d0d795463a50dc4a7c82fd8270f65d3	squalene_synthase_HpnC
0d10c7514fd3ae66c6732a24718cd230	glycosyl_transferase_family_2
0d127a40c455a7b7b77110058d5eab05	glycine_oxidase_ThiO
0d14a4bcf1ac2a40b617227ae3fb3966	magnesium_chelatase_subunit_H
0d15c80954f72c910331dde7aaf02fb2	ribosomal_protein_S2
0d1837fc1d138128a3c2268f482d2bf2	hypothetical_protein
0d1be1926fd38e861ae34db51b29d3ae	carbohydrate_ABC_transporter_substrate-binding_protein_CUT1_family
0d1c278ff0a9926ba2f4c442d97cadd3	hypothetical_protein
0d1da3b3e66d4d65f8b6fd4ca90687ce	transposase
0d1f8b201139ec27c476b4e15e953c9e	putative_TonB-dependent_receptor
0d20e0da45664071a9e1ef0551f44819	hypothetical_protein
0d21c9d96e5c62160f19011be2a458f4	butyryl-CoAacetate_CoA_transferase
0d2461d8fcda52cbbe665d3b04909a73	phosphate_acetyltransferase
0d27c74b0d42beac39d95d7b4625e846	aconitate_hydratase
0d2b810004e9ad72e70fa8fdd444e779	aminotransferase_class_I_and_II
0d2db0fb32ef087991e72ad3c5f063f0	calcium-binding_protein_RTX_family
0d3102340c97214c0ab68b71b0dfd021	short_chain_dehydrogenase
0d37bf8aa877b74df8477078709b8eff	hypothetical_protein
0d3cb7ff8cd2e91e29568ef34cbb71e4	major_facilitator_transporter
0d3fa1ec1f0a7a920fd6095f1141307a	alpha-ketoglutarate_decarboxylase
0d43ff44a10e5f1eeb5725d393ae5e1d	SMP-30-gluconolaconase-LRE-like_region
0d45908040409cd0c74260b0a98528af	excinuclease_ABC_A_subunit
0d4f11a3c097ef718e6927cc4dbc8f28	Polyribonucleotide_nucleotidyltransferase
0d4f3f2d23dd6ddeec0e4431c3e13746	NADH_dehydrogenase_subunit_B
0d53398ec81392a2a5e2247d1dc8aae3	ribonuclease_R
0d569e0ee2857193a2c8f85d4276980b	glutamate--ammonia_ligase
0d56cb01d690d634f961ba6f5a461199	putative_acetyltransferase
0d577f3bf53645876aded250b37e3bb0	enoyl-acyl-carrier-protein-like_protein
0d57e8e5c1b56c19475b628eb0a81be4	DNA-binding_response_regulator_LuxR_family_protein
0d5971b46ecfa2a19a3802c0519810c0	adenylate_kinase
0d60bdaf26b3fa26968537522b326573	membrane_bound_O-acyl_transferase_MBOAT_family_protein
0d61f7a341d6514679cc39f5ba823d06	phosphate_ABC_transporter_ATPase_subunit
0d62600a56e3dd8f6280f28672c587d5	CDP-diacylglycerol-glycerol-3-phosphate_3-phosphatidyltransferase
0d63c10c4330371a9a0c52c9b9c6e9af	peptidase_S9_prolyl_oligopeptidase_active_site_domain_protein
0d6477cb90a951d90813b1106dbac9aa	NADH_dehydrogenase_delta_subunit
0d64f40ecb133333c4820c12350beace	beta-lactamase_domain-containing_protein
0d66c4cf4504031d64a930023d0af183	protein_of_unknown_function_DUF140
0d68169a70474932600a785d899eb6e5	galactarate_dehydratase
0d6d31c683eca1163d56ae489d4ad7ca	bifunctional_phosphopantothenoylcysteine_decarboxylase-phosphopantothenate_synthase
0d716031658a454cb29a588389502b77	glutamate_synthase_NADH-NADPH_small_subunit
0d73aac50a30a3bba6676608c346efe8	excinuclease_ABC_subunit_B
0d74281cddaf37fb66ded3d50692ca17	chromosome_partitioning_ATPase
0d75262c61cf436767f9bb45317057d6	periplasmic_sensor_signal_transduction_histidine_kinase
0d77aa6f5f201e2a0e1f8d3332439263	ribosomal_protein_S9
0d7a1b79053897a07649cae3b2262910	LemA_family_protein
0d7c29c592d3fc6f80db0d4c8b67bb8a	glycoside_hydrolase_15-related_protein
0d899090e3532841a83e96fe0e8aa1a4	periplasmic_binding_protein
0d89ad8f42d4d70a62c10fd7fe16f92d	glutamine_amidotransferase_class-II
0d89de1b90349c973f37dd25a6085b06	iron-sulfur_cluster-binding_protein
0d93ab2330ee9c1b8847d9b359d67761	excisionase_family_DNA-binding_domain-containing_protein
0d95637a09f9d0ab77c262b73c9abc33	catalase
0d9885a521a8f5cae797908684fd446b	SusD-RagB_family_protein
0d9c0c542d3fed459fbcf45a7446feba	Alcohol_dehydrogenase_GroES_domain_protein
0d9fbf2d523fefa4b7788c3bcf42aa21	aldo-keto_reductase
0da127960eed16e511f1e67ea5496c3a	hypothetical_protein
0da2b950e3698f6516b8a39b408c036a	two_component_LuxR_family_transcriptional_regulator
0da4fa792030832137db9dfe5c5ae4d4	putative_metallo-dependent_hydrolase_putative_TatD-related_deoxyribonuclease
0dabd2b0dedf35ab6a260890edc83e4e	dnak_protein_truncation
0dafa602077ed54a26d9e67d3384bc10	putative_oxidoreductase_Fe-S_subunit
0db48accd5e500e48d415f51fe6debae	integral_membrane_protein-like
0db4d7f2ba2e1201370cb9b704526c70	two-component_system_sensor_protein
0db8b982567a370b298faed9ffc2952c	phosphate_ABC_transporter_inner_membrane_subunit_PstA
0db9b260fd15d9798bb78d628dbaa2a4	prephenate_dehydratase
0db9bc37c8c663cf1a2544865206b92b	hypothetical_protein
0dbb8b2bb15d3fe32197406cf8128599	succinyl-CoA_synthetase_subunit_alpha
0dbd6e12883e6aa8819e439cb7378001	putative_alkaline_serine_protease_subtilase_family_protein
0dbf47bfb0cce8aa3d8aa5dadcaccef5	chea_signal_transduction_histidine_kinase
0dc1e13d1832507147f36ef5745a3674	Thiosulfate_sulfurtransferase
0dc5f54824b1addbed2fbbd703464b3d	hypothetical_protein
0dcf147c6132923f7e6835f8879099f9	heat_shock_protein_Hsp20
0dd0c5e327a41586bf8e84e6838fc8a2	NADH-quinone_oxidoreductase_chain_D1
0dd46025b5307fd5b7b4489fba2594da	short-chain_dehydrogenase-reductase_SDR
0dd9729b60d125791704a1dafe6f66b1	short-chain_dehydrogenase-reductase_SDR
0ddf94d7c97840fefda6b2a0bfaa8c28	signal_transduction_histidine_kinase
0ddfef7919b86a342047b4042a7070bd	isocitrate_dehydrogenase_NADP-dependent
0de61ae90fa7f8d47276eac2c4d0f5d9	cobalt_chelatase_pCobS_small_subunit
0de79e2367b836596f8f83c0498083bf	cysteine_desulfurase
0de7ea2da504db19fc456041b7966aa2	transcriptional_regulator_PadR_family_protein
0dec64b06b616aded998228a682e61ab	acyltransferase
0decc81e9710923dde358e8675aaa22f	enolase
0ded551a0d46413959d32b3bc6a99b1d	isoleucyl-tRNA_synthetase
0dee046a764f4118625000d2d2679b46	IS5_family_transposase
0def47bddf10b0436fdb0143f78209ae	metallo-beta-lactamase_family_protein
0df1147dd28bd879fe7768edbe352890	glucose-1-phosphate_adenylyltransferase
0df1509e617393b91d031c784af312eb	alpha-beta_hydrolase_fold_protein
0df3114eb16fc01ebf5de07e4293cc33	hypothetical_protein
0e0035aba133ec3f31ad5af5c91a761d	hypothetical_protein
0e023642da472db40fb52bf21262cbe8	DevC_protein
0e02dedf9bfda10a58be71884cbfcfe9	hypothetical_protein
0e05171ed5d3c56225f908cc886d5be3	cystathionine_gamma-lyase
0e0546d36cd6b90431b7d2cb4f8771d9	ectoine_utilization_protein_EutE
0e05494149fc46307d5ed5daaeb1deb6	acetolactate_synthase_isozyme_III_large_subunit
0e05a2b293c5671da8109767433e0d66	o-sialoglycoprotein_endopeptidase
0e08cc1a5dfd50bc50e6a34cabe19d43	nicotinate-nucleotide_pyrophosphorylase
0e0c6b8b29ffbf29338078d667806876	acyl-CoA_dehydrogenase
0e10667feab70e24701622b595162075	hypothetical_membrane_protein
0e168cc601d5e71d34d4e26f2aca7490	phosphate_regulon_transcriptional_regulatory_protein_PhoB
0e170bb20f1ba2877b40e41f980beb47	excinuclease_ABC_A_subunit
0e182e3c3a6605dfb60967e04e68d001	benzoate-CoA_ligase
0e1b36cdef3259cae05686395ad50526	arabinogalactan_endO-14-beta-galactosidase
0e1b5048a989fa1f74505773fc860342	ATPase_associated_with_various_cellular_activities_AAA_5
0e226f69c8528412a3439ba9156f1e1d	beta-lactamase
0e25e0f9723f1db8ea62b1fe870c9ea3	cobyrinic_acid_ac-diamide_synthase
0e2973047fdcb90d3a0d1eeb211ea49a	adenylate-guanylate_cyclase
0e2cdc8247327e316949fd330205b55d	DNA_polymerase_III_subunits_gamma_and_tau
0e2d3e44ecadf36dbe45d71123ea9a69	Chorismate_synthase
0e2deec3c079ca51ee0f0f777d232f93	carboxylesterase
0e2f18fc9ead369f8e6c94ed24383a04	stringent_starvation_B_protein
0e3158744cdc12912c200bde6681b94f	high-affinity_D-ribose_ABC_transporter_ATP-binding_protein
0e33726321ecde1f8b277fcc007ac834	hypothetical_protein
0e36967a34286e74fb4d7f19b2a2d9cd	hypothetical_protein
0e37337ba3e74c64514d2fdbe9f565ac	lipolytic_protein_G-D-S-L_family
0e3743089faf6ef4cf5ac4932bcc300f	ABC_transporter-related_protein
0e3cdf1d5b6863efbbbf818691808d3c	v-type_h-translocating_pyrophosphatase
0e424b6b4905fbfe6020ef54c05957c4	thiamine_biosynthesis_protein_ThiC
0e471c18722f1fe96ebeaddf8ff52b7b	hypothetical_protein
0e48d27d2a61ae361c5a3250b50ffa30	Histidinol_dehydrogenase
0e4d09743b7bce9fe4a8953fd7d56db0	hypothetical_protein
0e4eddc48307d3fc3dc669b75f14eb57	DNA-directed_RNA_polymerase_beta_subunit
0e4f521a058b05d4f4a8ea2f540903eb	short-chain_dehydrogenase-reductase_SDR
0e52a5f8957664f0d787fa44d0d2feea	putative_transcriptional_regulator
0e52e854dc4935994bed42349c5e031c	type_I_secretion_membrane_fusion_protein_HlyD_family
0e550831e6951da811c362c03e8cc12a	polar_amino_acid_ABC_transporter_inner_membrane_subunit
0e55f8debbb3d29293fdec87cf373fd4	glycogen_phosphorylase
0e57f85f241c733e6c340fc155d6c7cf	RNA_polymerase_sigma_factor_RpoD
0e585914b470f2e4c73bd833b102080f	FAD_dependent_oxidoreductase
0e5b88ad90a1671e25ee1b0e36425af1	glycosyl_transferase_family_2
0e5caf505861a744700c1058de103a43	ABC-3_protein
0e5cbe3d50a79e088382d123756ad9fd	precorrin_6A_synthase
0e5ff2b3407331f103f5f589ccf59d5d	maleylacetoacetate_isomerase
0e60bdbbfc9e1a929cdb3e13a3ea8781	valyl-tRNA_synthetase
0e6415c90292a472f3c77f9937333ca6	hypothetical_protein
0e65d3a6ea701355b19ad068e807fccf	K-transporting_ATPase_B_subunit
0e6955fd0a185ea89beedc4a9c97920b	acetoacetyl-CoA_synthase
0e6e502a87d445b0f7e5dfb5737a396b	stress-responsive_transcriptional_regulator
0e73674ce51420d9d4ac02e5cca64264	hypothetical_protein
0e7528cb866a3f817025e5ac9c791aa3	hypothetical_protein
0e7997325deeb4bf947910bf01416a62	phospho-N-acetylmuramoyl-pentapeptide-_transferase
0e7d83467e6132139dc112132c457c63	glycyl-tRNA_synthetase_subunit_beta
0e7f267b34e3c06b6966773cadc04504	oxidoreductase_domain_protein
0e865672d8da3d4cfaafe7a5fd603b31	ornithine_carbamoyltransferase
0e901e8b10b25bb2528655a3d1c29b14	translation_elongation_factor_1A_EF-1A-EF-Tu
0e9181a14bd60df72ed6c895a1dc8af0	ATP_synthase_F1_beta_subunit
0e98ac2eb9c6a556ca8eedd1a35da2c1	multidrug-efflux_system_acriflavin_resistance_protein
0e9d0d67180b71fe61a186b338250b31	putative_MFS_family_permease
0e9d483af55c10573f4ed0d9462f2aa4	bifunctional_protein_riboflavin_kinase_FAD_synthetase
0e9edfdbfdb9cd9821ef3919f0b2819f	putative_cyclopropane-fatty-acyl-phospholipid_synthase
0ea0bf91480f1b43160cafbc43b0da8c	3-demethylubiquinone-9_3-methyltransferase
0ea0cf15d1596eb7cb4831b73cc5172a	AMP-dependent_synthetase_and_ligase
0ea5ed2ba4519e5b1c3b569cd66162c4	hypothetical_protein
0ea787253b5796809af0c715e2b06405	Mo_transporter_inner_membrane_ATP-binding_component_ModC1
0eaaa2de590a95bc7236f125926fc7d8	gamma-glutamyltransferase
0ead5d4307a47eafdbf75719351b8d77	TPP-dependent_acetoin_dehydrogenase_alpha-subunit
0eb38795f4baebe9c03d6a47adf8a408	methionine_aminopeptidase
0ebb9dacd275983fbcb6d251c20f48ff	peptide_chain_release_factor_2
0ebe07f66533a4f2ee07b6da4626716e	threonine_aldolase_family_protein
0ec234060e89eeae3e3af3b1025c2036	fructose-16-bisphosphatase
0ec774597e2a99eb123cb3ffb26c5d6a	ABC-2_type_transporter
0eca1f9dfcdd9675a3f239505b9d5b14	ubiquinone_biosynthesis_hydroxylase_family_protein
0ecb13716575793c9ab5799cf5c7990b	Glucuronate_isomerase
0ecc0ecd1e2059df254a0aa740cf9438	amidohydrolase_3
0ece600d0084cebd4b38bfaa0ab12bf0	K-dependent_Na-Ca_exchanger_related-protein
0ed20cf0ec6bf451f9c9a904175fc30c	2-oxoisovalerate_dehydrogenase_beta_subunit_protein
0ed3267680fa805cffa1da7b5ff42acf	serine-threonine_protein_kinase-like_protein
0ed65d87cf48ffe3d2a7518d3ab7d243	Integrase_catalytic_region
0ed77ac1c25f6b1877f308a3b06e8ffa	conserved_hypothetical_protein
0ed96ee23367ed0e043716755061a977	transcriptional_regulator
0ed9a2e20f41da77c7358af171a86b1e	alpha_beta-propellor_repeat-containing_integrin
0ed9cc455be0aa404b67b4802f4e5b39	ATPase_associated_with_various_cellular_activities_AAA_5
0edb631af1c2d7001733e42af8f92bad	beta-ketoacyl_synthase_fragment
0edf86a619c42566b5732fb93f5012dc	Transketolase_central_region
0ee0b9ac82117454b92e4a50c47aa86e	ribonuclease_BN
0ee2825657b22b71267e8b72dc85fcce	chitinase
0ee3616cdd6aa6651e49dfe733731a00	succinate_dehydrogenase_flavoprotein_subunit
0ee37ff9a3d6509d0fa0927924ffa244	general_secretion_pathway_protein_D
0ee44c7e9ca5e676cf80b5de3f04d45d	propable_16S_pseudouridylate_synthase
0ee68fc3cc9e79673ffe0f0c0be3fc2f	cystathionine_beta-lyase
0eec695cd55577102b96fddc2c93d4d1	phosphomethylpyrimidine_kinase
0eed05d0927ff781b38b4654149f8f97	putative_phenylacetate-CoA_synthetase
0eed4e0854a78ad5f9b72fa31a010079	3-oxoacyl-acyl-carrier-protein_synthase_2
0eedfc12a0bb6c68a9295446ed39c6a3	Fe-S-cluster-containing_hydrogenase_components_1-like_protein
0eee82875aab53cbd0f80501008f21a5	transposase
0eee86199c6fc720838f90ac8deba790	short-chain_dehydrogenase-reductase_SDR
0eeed2547d3ce114ef7d182377125622	GntR_family_transcriptional_regulator
0ef13a3b3d1bbc7ff85a37d9f924abbb	tryptophan_synthase_subunit_alpha
0ef60e60f0f7dbb84948565ef08028ef	ATPase
0ef820a7ca22399473fec595a9bed150	multi-sensor_hybrid_histidine_kinase
0efb0776a19e0ad2ed511d81bd7ab315	FG-GAP_repeat_domain_protein
0effa91ca62fe83ad0908faeee5e8a11	hypothetical_protein
0f032369a50b70f6ee07ab8d797fb99c	threonyl-tRNA_synthetase
0f05afc9c7eab9d6ecbf4d3869d0831a	EmrB-QacA_family_drug_resistance_transporter
0f088e2a73abcf571ccc088c8b56c281	malonyl_CoA-acyl_carrier_protein_transacylase
0f0ab5e25a929d547d9f12c81a9d505d	3-hydroxyanthranilate_3_4-dioxygenase
0f0d7f6692ec96f3cd346a9fd16034df	allophanate_hydrolase_subunit_1
0f0e6c9537950ca5655d88b1859c80f1	tonb-dependent_receptor
0f0ed98c33340cd30b0f446e72b01826	phosphoribosylformylglycinamidine_synthase_II
0f115abecd42c58822fd8ac359214e75	flagellar_motor_switch_protein
0f120eda96f1c8a8ba487539c8694da6	Glycogen_debranching_enzyme_GlgX
0f137ccd5e96fe16bfedc559609f2f0f	proton-translocating_NADH-quinone_oxidoreductase_chain_M
0f142c534fc4aaffca800d1fc5a85e86	hypothetical_protein
0f1732484d62c2bf0b863651f8d4cc8b	50S_ribosomal_protein_L3
0f17bfd6090d403ed1d04f3f643f43eb	lactoylglutathione_lyase
0f1e80bc2e5312b669d329b154dbbcec	Type_I_secretion_system_ATPase_HlyB
0f1f45f743de4edc83c02b2302d22f20	asparaginyl-tRNA_synthetase
0f22cda9cf9b762ed74296790e5d99c0	binding-protein-dependent_transport_systems_inner_membrane_component
0f22f878cc58e622627106a5231ed8c9	4-coumarate_CoA_ligase
0f261bdf4dd89d15089b9a2aad347936	Phosphonate-binding_periplasmic_protein
0f27e2aca23da560bc1971caacd7999e	carboxyl_transferase
0f286cf1079f4d14d9d8979e9a5cb41f	heat-inducible_transcription_repressor
0f292991f535e6780ac684143b3ac72f	phosphopantetheine_adenylyltransferase
0f2cc09cadf69e153c75320caf813b68	dihydroxy-acid_dehydratase
0f2d6b5801f5678d848e2fc1eb4a6679	D-isomer_specific_2-hydroxyacid_dehydrogenase_NAD-binding
0f317c974dd8aafb798da8b310d0492c	RNA_polymerase_sigma_factor_RpoE
0f367666fa1fd6f1c303b17ffa6bc884	monofunctional_biosynthetic_peptidoglycan_transglycosylase
0f374608e476966983d42e4df121da3a	30S_ribosomal_protein_S10
0f3842226aaf74f1abe57accab70187f	hypothetical_protein
0f39954b68ad1d8b47e3fd50738e3e51	alpha-glucosidase
0f3996e3f507766df32c64e41f2f36bf	acetyl-CoA_acetyltransferase
0f3ca27e42f7b1e40a30d3d4379b6420	malate_synthase
0f40da61fd6990eaaa892881a57e3db8	molybdenum_ABC_transporter_periplasmic_molybdate-binding_protein
0f47dabbc61be5718de5f43014405899	L-lysine_aminotransferase
0f48a2fe34abaf0e29b6141295885774	hypothetical_protein
0f4df3f6710b06ecdce02e935f69a255	hypothetical_protein
0f549e5d56db3a3b77fd80719a0e8aa9	molybdopterin_dehydrogenase
0f56c64efe651986610c06f179fd63b1	hypothetical_protein
0f5760aacfcb70fc052a8961d7ce6067	DEAD-DEAH_box_helicase_domain_protein
0f5aeae9c65b89b37644da1bd7a7f97d	putatively_membrane-anchored_aldehyde_dehydrogenase_protein
0f5de9fc74ba18d2f578d6472e1f1aca	elongation_factor_TU
0f5f9dde50be64dcd1bc32803908ab79	HTH-type_transcriptional_regulator_DegA
0f665a1c939ac76f0e386c4cb026d0d1	ABC_transporter_ATP-binding_protein_putative
0f6bb762632cb44ba195c201fccca1f4	oxidoreductase_alpha_molybdopterin_subunit
0f6e6be59426b2db0b17d4c6d4b9fd2d	putative_5-nucleotidase_family_protein
0f6e8a2da224fc5b14c33979b21e9f13	nitrate_reductase_beta_subunit
0f778f2f09a4613508549ea01da6d8e7	phosphoribosylformylglycinamidine_synthase
0f78b8d1c28dbf020a8bea9b9fce2a2e	glutamate-ammonia_ligase
0f7a4f03fd9f60319710ea5cfb229bdc	DSBA_oxidoreductase
0f7f83d88d566aefc2165597d65e0e02	organic_radical_activating_enzyme-like_protein
0f84148504d8a17970f8de9cadfeca5d	polyketide_synthase
0f874263fd05384eaa9465761f1a1ac7	pirin_protein
0f87d4e9fe4d19eb5a91e3cd27851b6a	AhpC-TSA_family_protein
0f8bb989ab6a9321cb4051815597754a	ferrochelatase
0f8dafbc81eb9b69cd671cccf8293f32	NAD-dependent_epimerase-dehydratase
0f8ead8755b011509db5835f58cbeabc	2-dehydropantoate_2-reductase
0f939467257def5caa02e0683b677740	protein_of_unknown_function_DUF195
0f9af36a1c3449b99eaec875bea034d1	xylose_isomerase-like_TIM_barrel
0f9d8df195162d52f7336d5d4a0c80ef	MotA-TolQ-ExbB_proton_channel
0f9fe7e322400042d8d19b62d5ac4d50	hypothetical_protein
0fa4edf60ef6fdc6983133df7f06df45	cytochrome_c-type_biogenesis_transmembrane_protein
0fad7b09f14e6c70f109645a5fdd2734	D-3-phosphoglycerate_dehydrogenase_SerA4
0fb3465475e33953f6d45168b5f28a34	hypothetical_protein
0fb6f246257d39a5e93e0d5d99645b89	cytochrome_caa3_oxidase_subunit_I
0fb75d9265209f2206b9a10cf033b573	Prolyl-tRNA_synthetase
0fb8103cdc28ae9007457784c9e59ba0	major_facilitator_superfamily_MFS_1
0fb89d0e6c86160ef63c5ee404beff9c	tetratricopeptide_repeat-containing_protein
0fb900390c344ce08cdf83649aed0a9e	Non-specific_serine-threonine_protein_kinase
0fb926a7ae503bf053336fa102e0d8d7	excinuclease_ABC_subunit_A
0fbaa8077263b643e5aa4596d8b67863	hypothetical_protein
0fc175369b1870ff6f9e292adc0f457f	terpene_synthase_squalene_cyclase
0fc2bb442dca95ae7697ced6ea860d93	iron-hydroxamate_transporter_permease_subunit
0fc4c19909fbc1d7c5ba21272ab147d8	protein_of_unknown_function_DUF1501
0fcd2af02cfa478cd135fc479072c6e4	VWA_containing_CoxE_family_protein
0fcd577ad0e750cdc1e92ef2e9bc2ac1	von_Willebrand_factor_type_A
0fcde3bea6aaf12496f75174914346ae	binding-protein-dependent_transporter_inner_membrane_component
0fd0fab41d9744850533974ed4fcf2fe	cyclase_family_protein
0fdd49923cd6fef4c6a6783288696364	allantoicase
0fde26d78cedc7d28d68290cb4e813f8	DNA_gyrase_subunit_A
0fe3fbd67c7318e90af0bddeff1af8cc	N-succinyl-diaminopimelate_deacylase_dapE
0fe464385698caa983bab46e623ccfe0	phosphoglucosamine_mutase
0fe7922dae38f3ee0cd62ed64dfe7e42	FolC_bifunctional_protein
0fe9ba5a405d5fd64cb89a7cb38af8f1	GCN5-related_N-acetyltransferase
0fee29d6959a47a0d2a65ac2fa16e15d	5-nucleotidase
0ff09e817d2dc0915cfaec98a5cae40c	50S_ribosomal_protein_L5
0ff12000d2ab9bbf97d1ef4c2a405d48	transcriptional_regulator_winged_helix_family
0ff2c7973d83a5c633dd4e7666df516d	transglutaminase_domain_protein
0ff6b3072e1b0de15f457934136ebb64	hypothetical_protein
0ff8bc29494e9b5fd338b24a67ac1f2a	putative_acetyl-CoA_acetyltransferase
0ff903cb19577b022e47406355555520	Alcohol_dehydrogenase_zinc-binding_domain_protein
0ff99fc75bd5d4bdb49951b19f302ddb	Porphobilinogen_synthase
1002421b96adbd7dea169c6673143089	hypothetical_protein
100261782d3c8d94d37966ed331f615b	NusG_antitermination_factor
1008a9b84493d9afe2183b1cf8778755	glucose-1-phosphate_thymidylyltransferase
10096d73a34c03bc62b5bcf8d6dda427	acetate-CoA_ligase
100a27f3c353b8bfcb77af7e9872e22f	ABC-type_transport_system_permease_component
100dea736a7abff60558ccfb8baeae15	hypothetical_protein
101123b2f0820087506c607cfef238ad	alpha_amylase_domain-containing_protein
10168848479350b82e383cb5adb20d34	integral_membrane_sensor_signal_transduction_histidine_kinase
10184fd1ed8edf15ca2acce642da2f50	phosphoribosylaminoimidazole-succinocarboxamide_synthase
1018a94b5b9fc80ce02dfa4d4c552c77	putative_acetyl_xylan_esterase
101cd7f0abf7b22cbe71b39482208729	UDP-glucose_4-epimerase
101d45bede4a57a4b914952648ce5b60	transmembrane_regulator_prtr
101f09c3e13e1ba3a6f2a1aaf4a56752	peptidase_M20
10228cc74a4996cd1f2a9268fe19e74a	hypothetical_protein
10241d7ab499d2868a3ea8f753f6305e	recombination_factor_protein_RarA
102427ce48989a8329862fc3e39dd513	hypothetical_protein
102956c5c8a42a8821447609ddfe6ef8	FAD-binding_monooxygenase
10361c5264200a7e68ad4054ebabb351	5-aminolevulinate_synthase
1036762b895038d8b89e7c124f8d812e	Gp08
10377dc238911d3614f43397ecb3ee6c	phosphoglycerate_kinase
10412263766024ab41cf4c1b4f68430e	acetyltransferase_GNAT_family
10418e15af5f1996e665e01f7f53de20	phthalate_45-dioxygenase
10420f994e1f033b5d5448839fb2f4cf	ABC_efflux_pump_inner_membrane_subunit
10475cf37b2a6804a5b820cac43238c8	response_regulator_receiver_protein
1047934293aede51d98dfbf0f8aa016c	ubiquinol-cytochrome_C_chaperone
104b8c058064631a5bde868756accb80	helix-turn-helix_domain-containing_protein
105127d3fd8f4d2ab7af528f36db250b	FAD-dependent_pyridine_nucleotide-disulphide_oxidoreductase
1051a5fa590338c9c5418ed6a9a128cf	GTP-binding_protein_HSR1-related
10560c1f55da3cc2b8dcf29e630c42ae	Rhodanese_domain_protein
105828f6723771a902830ad92ecb94eb	hypothetical_protein
1058ae90c56b81280031afd8ba15e5dc	resolvase_domain-containing_protein
1058e2036fa092debccb299b40fc11b1	XRE_family_transcriptional_regulator
1059c525cd7c64f207a748dbe1a7d6a8	polyhydroxyalkonate_synthesis_repressor_PhaR
105ccb6b13632f85121aaaa333e65873	sigma_factor
1064147c4ea2262a09424ca044f27dd7	beta-lactamase
1066c8e6586ccd0bdbc8267c85c6b514	enolase
106b0c8b06bf0937e38dd6da059004e3	putative_DNA_ligase-like_protein
106b15185b1b67786cda4bccf626685a	acriflavin_resistance_protein
106eaeb84c99ea96841f20fa12100214	DNA_gyrase-topo_II_topoisomerase_IV_A_subunit
10708253c5a66c2592745da1fb27634e	trigger_factor
10774e89ef40a30b5f649476a9d1598a	amidohydrolase_2
10780791981749f1c3f5a0381ca00756	peptidase
1079556c5cd843108c5e5128c2ebfd05	putative_UV_damage_endonuclease
107e8c9813c163e852b78d8df1155334	AsnC_family_transcriptional_regulator
108052caf5ae65de69711016577981e0	hypothetical_protein
1085b2f9821d7a5ffc5fa7cbf4454946	excinuclease_ATPase_subunit
108610a06bbd9fe5a074ace873c02963	3-oxoacyl-acyl_carrier_protein_synthase_II
1086d570499f6eb11372ec6b08d3621e	hypothetical_protein
1087a88a4e72fd62280796d6fedd582b	hydroxyacylglutathione_hydrolase
108a14e91a5c1bc3c115b3776e4a3713	uroporphyrin-III_C-methyltransferase
108bbaa55051e9bd2d8a0bd931487349	short_chain_dehydrogenase-reductase_family_oxidoreductase
108cc95b98f52b266ebd69721cda180e	hypothetical_protein
108dd5983812c8668f9d18189e24c327	membrane_protein
108e57e64bb9e9729f97ff67c794eb4e	tRNA_uridine_5-carboxymethylaminomethyl_modification_enzyme_gid
10925305e0eef00c034dba4bcbeaa870	hypothetical_protein
10954c09c9619f459be792b03c3f516f	two-component_hybrid_sensor_and_regulator
1097694469e2d2f12e21e47c8db1d9ee	urocanate_hydratase
109c2bec055aeb4cbc5c163a6aa8a708	putative_esterase
109c5f16a80121a7b2693764bfb52f9d	hypothetical_protein
10a164003847e24f8a0d48c41ea0e6bc	excinuclease_ABC_B_subunit
10a1878f5680c600eb58c4e2b54a002f	amino_acid_permease
10ac5dbfe1167b8c1a18cb97775032b4	beta-lactamase_domain_protein
10b04aab6acf5e57dbf7d4b4cd814c68	SSS_family_solute-sodium_Na_symporter
10b1abcdd2bda33e9a3e00d90a7d7bad	GCN5-related_N-acetyltransferase
10b55c89402ca87ef45c1dca64f51bc5	theronine_dehydrogenase-like_Zn-dependent_dehydrogenase
10b777eff071493f8a80162deaffdfa0	putative_large_permease_of_TRAP-type_transporter
10b9cf47117e3df98a566f4c45645f01	SCO1-Sen_family_protein
10ba5830e125d89be7027c15aa8da728	hypothetical_protein
10bb9cfb3fa64b780cb904526d958eaf	Ku_protein
10bf233330d4951802c64428fade45c1	NADP_transhydrogenase_AB-specific
10c49bb9283c16e491cf652ed23548d4	glucose-methanol-choline_oxidoreductase
10c78660f3ff2f3bb72c83344ce578e9	major_facilitator_transporter
10c96da721fa1171312aa9c8be9166bc	aspartyl-glutamyl-tRNA_amidotransferase_subunit_A
10cab33c0ecd823365e60983f44e72f0	tryptophanyl-tRNA_synthetase
10cb80d15e2b463dffbba1569c0e5cb8	branched-chain_amino_acid_ABC_transporter_ATP-binding_protein
10cc25f878bfaff7bf32a31dd1486039	hypothetical_protein
10ccff4f972ec1cd2b6eeb05701d66e5	ABC_transporter-like_protein
10cd7d7e35c8deff2b14820eadd84b37	UDP-N-acetylmuramate--L-alanine_ligase
10cf76756aafe0bcf7af868ae61a68d4	deoxyxylulose-5-phosphate_synthase
10d103986f42147eb130f788b6d3061f	flavoprotein_disulfide_reductase
10d2ea122d851a6904a5724083e97417	aldo-keto_reductase
10e208a50e46bc66745a34cc709d2971	FkbH_like_protein
10e627f70e5df764b865d9e9cec37190	recA_protein
10e6f81ab985da0315c4256007853091	putative_sulfurtransferase
10e7178d036cd5b9e27594cbaa439f0b	DNA-binding_response_regulator
10e733e47766fdaf326ac3306447ebcf	Type_IV_secretory_pathway_VirB4_protein-like_protein
10e9ac1817302b94f66463bda00dc6e6	conserved_hypothetical_protein
10ecd0bfd8ed870bba4180c472d8c0c7	glycine_cleavage_system_T_protein
10ee948eb193f2c912701fca13df7947	ferric_uptake_regulator_family_protein
10efd691a9cc48ca14cf5d58d7ece8f2	threonine_aldolase
10f74fc3c42b4a8dc49173c9a5b703d3	GatB-Yqey_domain_protein
10fc29afff5c469fc3d4b07e64826647	putative_bifunctional_ribulose_5-phosphate_reductase-CDP-ribitol_pyrophosphorylase
110590b6d8bef8a0201ab18b0bcbbfed	uroporphyrin-III_C-tetrapyrrole_methyltransferase
110a78eb67282dd2d30b69c22823887b	6-phosphogluconate_dehydrogenase
110caf2db8ed808acfc0532dbc16da19	inner-membrane_translocator
110ce79195e5c4aef62c875524494eca	lysyl-tRNA_synthetase
110cee8b82f08c62acd2e228bf510c7c	excinuclease_ABC_C_subunit
1117c77f0de48950970b76f81887c931	benzoate-CoA_ligase_family
111bda1e2f3bfe1d3e25bbf40e547934	cadmium-translocating_P-type_ATPase
112c043282f0f4ca182a32ecde596c6f	ABC_transporter_related
1130f1d5c43e20c97751350adda9065a	preprotein_translocase_SecY_subunit
11315c23cf31ee126135933151ebe86b	fumarylacetoacetate_FAA_hydrolase
113a26dc1691190fc4922a28a3bb3c2f	beta-lactamase
113ae1ffef9567a29fd4d6d06be03237	hypothetical_protein
11427b64e6561064c6acfc0ba9aeee0b	glycosidase
1143b4737446cfbf5cff9e0645e19c5c	hypothetical_protein
114a5c14399f6a6b8c8becd1d00b81ef	phosphotransacetylase
114db025eff45d748da5356e068b1442	isocitrate_dehydrogenase
114fa0589b0dc4cf85e21672629f66e6	vitamin_B12-dependent_ribonucleotide_reductase
115157b543837457aff428d035ef081c	haloacid_dehalogenase_domain-containing_protein_hydrolase
11518c5ea1679bff893dce5e883785db	catalase-peroxidase
1152c7ab9362adbbcd76a4b88a9e00a4	NAD_dependent_epimerase-dehydratase_family_protein
11587064b629b0c18076ceb5af1a205a	hypothetical_protein
115aa4c5d6be304e196831cd367c574c	citrate_synthase_2
116051485b18db61cccd419be9498cef	2-oxoglutarate_ferredoxin_oxidoreductase_subunit_beta
1160b722cfd98d210559b495d5a52585	fumarate_reductase_iron-sulfur_subunit
1161ead8ef8253ed3cf2fe165fbf5044	CoA_transferase
116a9b0697f6d20ed1924ade1294f868	branched_chain_amino-acid_ABC_transporter_substrate-binding_protein
116dcfd0a58fe5703c0b77472e43412d	phosphoenolpyruvate_synthase
117888648d626bbc0670fb4d4cbcced9	TetR_family_transcriptional_regulator
11788ed4d82fbc22a1c4c9b32341cc82	Cytochrome_b-b6
1179342ff3549e8ea92fe0f1a0af9bc7	hypothetical_protein
117a286af203f5275f2b43ff57665239	hypothetical_protein
117a67eb8c8d87f0f275b146472f9bf0	nitrate_transport_ATP-binding_subunits_C_and_D
117a9a6dba77560f4d6e4d63dbf68d64	glycine_cleavage_system_T_protein
117ab69dc1eee4f6a7c62407e8d3c3a4	phosphoglycerate_kinase
117ac1edaef8795d39f13a1aaddca464	NorD_protein
1181da5ee2cbdda6eead5cd31becb0ec	putative_NADPH_quinone_oxidoreductase_zinc-_containing
11826416d01710026508bb040cce1244	S-adenosyl-L-homocysteine_hydrolase
1183360647647207a0919915821727d2	Catalase
11874ab75879bd91ecbb4921442a27cc	molecular_chaperone
118b109b5fd09db786f38a8eb70872fa	hypothetical_protein
1198ecd5adb3df1a08ce24296a7b4d2c	ferrochelatase
119c709a1a0a9eb11240b3a1cdac9fa7	cytochrome_c_oxidase_subunit_I
11a034f0780555579083be39bf310181	septum_formation_protein_Maf
11a1555eb0dcc7c342bd5eea9b455290	hypothetical_protein
11a70615bc64882616cb7b5b49797304	L-sorbosone_dehydrogenase
11a91bf3290fa44c488140cff0f772df	FeS_assembly_protein_SufB
11aa904be50537e066e3a14709dad5f0	ABC_transporter-like_protein
11ae298f21ac20f956891b13dbac8e8b	LamB-YcsF_family_protein
11aeab931fb29a487b4d2f9f2ff1b1bd	dTDP-4-dehydrorhamnose_35-epimerase
11b118f12d330edd2559bc601230a136	O-antigen_polymerase
11b27ef18ad24b37668efde72307a470	branched-chain_amino_acid_aminotransferase
11b3df16692ae4ab8f098ec23af2219f	putative_TIM-barrel_protein_nifR3_family
11b563afa5c4e203011258cbf59ec72a	hypothetical_protein
11ba0ade86519ff4017691722055cbcb	cytochrome_P450
11bf3ba6ae9db5e4d37a2475189136cd	ABC_transporter_ATP-binding_protein
11bfa36f1a7be8110842b0547d28a376	ribosomal_protein_S14
11bff38a687868bd053af923d9812c5b	DNA_polymerase_III_alpha_subunit
11c29da98ca392493c00198b358bda98	APHP_domain_protein
11c931dcf0d70871a8bee17f6edddf17	acetoacetyl-CoA_synthase
11ca4ef698fa7106d4aeae78b6ff1f3a	quinol_oxidase_subunit_I
11cfe0a7fd06aa1926cb71c261066155	possible_outer_membrane_protein
11d14f421e465d44aa65bb86ab665007	hypothetical_protein
11d2209447e845dc9e321f31ae8a770e	NADP_transhydrogenase_subunit_alpha
11d38b5bf438e426d2f72be951e673cc	binding-protein-dependent_transport_systems_inner_membrane_component
11d6b33ae698255e545923f4fb1abf4d	hypothetical_protein
11d780e1c40694e409ef01fecda92a48	insertion_sequence_transposase_protein
11d8bce4ee07e1ff57ab65121003d0f5	hypothetical_protein
11d989fc33e3053d5e641b07ae64ad3e	cytochrome_bd_ubiquinol_oxidase_subunit_I
11db7724ca330b497271cada00f04674	oligopeptide-dipeptide_ABC_transporter_ATP-binding_protein-like_protein
11db7d0cba7e372e0d6a5d0771619980	leucyl-tRNA_synthetase
11dd0edda01d7acc79aab8b133c927d1	SpoVR_family_protein
11e0d064817103b4ac05ad12e2717a63	Methyltransferase_type_11
11e5d7f7e59aa027157937b2c024ca2e	Mandelate_racemase-muconate_lactonizing_enzyme
11ea3003d152a7f7f5e9f9b95136a88f	hypothetical_protein
11eb85955543cd685c6e484011f2b196	salicylyl-CoA_5-hydroxylase
11edb1e35cbe22462fe5ca9915549b52	D-3-phosphoglycerate_dehydrogenase
11f20913e6a5dcd95f24a2dc602bbe14	ABC_transporter_related
11f2256d46e07ec26f08f8236aa6dd05	hypothetical_protein
11f2f848c4c75c95e027ec4a5928259d	peptide_deformylase
11f364757d7726a324a2f7902d7e0e99	hypothetical_protein
11f56435b8615174425844faa9c3d4bf	diguanylate_cyclase-phosphodiesterase_with_PAS-PAC_and_GAF_sensors
11fb2bb4a51019399ab1032d08fc942d	hypothetical_protein
11fc87037fa1517acdfb09ac79d83d84	ABC_transporter_ATP-binding_protein
11ffe10df5fb1e949702417954dd492c	bifunctional_sulfate_adenylyltransferase_subunit_1-adenylylsulfate_kinase_protein
1206f843221ab3e4aa6206aad696ba6a	hypothetical_protein
1207717ed3c0fc1f1853e720095b11ca	60_kDa_inner_membrane_insertion_protein
1209e65c5ab2de9092a2d7db8714d92d	lysyl-tRNA_synthetase
1211d421ecbd580bed0e661a0b956436	acyl-CoA_dehydrogenase_domain-containing_protein
12123e3be44f4f7be00db11e271145ea	heavy_metal_efflux_pump_CzcA_family
1214a653ee6795efe7625a375b1614b7	exodeoxyribonuclease_VII_large_subunit
1214e76e97eda5e42f76ef6de7b9e24d	phosphate_permease_component_of_ATP-dependent_phosphate_uptake_system
121fe773e80cfd3bd13b7dcf33d0f900	TrpA
122197df5f5315836cc47f52ad640fd8	fructose-16-bisphosphatase_II
122f34564d84fd38310c23d2ce9307bf	Catalytic_Domain_Of_MutyY
123098011bb552d2fb2337bbd9509046	type_II_secretion_system_protein_E
123367e116d539feb09978a46d5f0b7d	CDP-alcohol_phosphatidyltransferase
123d892802dbc1d6c99506ab1d211055	tryptophan_23-dioxygenase
12444ac11bd0865e7580864e7eb220f6	transcriptional_regulator_of_LysR_family
12444fe8d24c2d579c9d8d72ea42ea4a	Site-specific_DNA-methyltransferase
1246565a6733302fe6086dc08e7c7a29	conserved_hypothetical_protein
1248adf8754a8fb8c690ce447e4e37c4	short-chain_dehydrogenase-reductase_SDR
124c4a49b80670656a07c9716167dc4b	tryptophan_23-dioxygenase
1253c9b4bef9cbc16f7ba4ca5dbeb4eb	thymidine_phosphorylase
1253f3b1045f75b35623511f6596f1a6	purine_biosynthesis_protein_PurH
12547cff7015597b7e191534b7a8109e	UDP-N-acetylglucosamine_acyltransferase
125843230cbed68720f5be4acbe398d7	formate_dehydrogenase_beta_subunit
125a26d083224c94ca5dba727c939268	short-chain_dehydrogenase-reductase_SDR
125cb3f6ece8e4e72d20f2acc896c636	ATP-dependent_clp_protease_ATP-binding_subunit_clpx
125cf2312023054eb4730c1cf70062b9	GTPase_ObgE
125eec9f1da73dba1ff48a9572e0c3fc	ROK_family_protein
12649d63122545c5fae2bb8878b4c499	transcriptional_regulator_TetR_family
12682818e318750b0a1b8f6af1b6c9df	isoquinoline_1-oxidoreductase_beta_subunit
126a9d1d18cc2bcd610cec9f104daa12	adenylosuccinate_lyase
126e7002d3170760652bbbba111ba81a	haloacid_dehalogenase-like_hydrolase
127049cf43110b69e4bc7db5d8d92910	HflK_protein
1275a037830a8bfd3df64607f1c3d48e	PfkB_domain_protein
1276066d5d6f81c7b9b0998e39ea614c	acyl-CoA_dehydrogenase_domain_protein
127815df8dd856dcf61cf761a65dc00f	hydrolase
127817d1178a43afad9aa05044569167	ISRm2011-2_transposase_protein
12787164f9680f5c4dca31ff6e0dbc4a	cell_shape_determining_protein_MreB-Mrl_family
1278dbc81fdd4d5748e40ee6b49ea0a6	Integrase_catalytic_region
127c9f6681e6003af224d257bec1f3ea	hypothetical_protein
1282681c4a97d4a14cbdb5e5e1bfacd1	hypothetical_protein
12829a4f4fa7d1baa4f89eb434c89728	ECF_subfamily_RNA_polymerase_sigma-24_factor
1282e15c3d955cc957107d7c6fe0c7cb	binding-protein_dependent_transport_system_inner_membrane_protein
12856181ba6c2270c700e5a39efd85fa	extracellular_ligand-binding_receptor
12873b53c9a980a925684d62b258fd06	hypothetical_protein
12878ecd5185b40b523b3e36513af506	hypothetical_protein
128827a37b243d4d839a727aabb6afb0	aminotransferase_class_v
128e01263975422b1642ffe40e3ad4d7	binding-protein-dependent_transport_systems_inner_membrane_component
128fcfe70d5d097f06ceb4874597e07a	Carbohydrate_binding_family_6
1291830fa89f8464df7d72ca584c4283	transcriptional_regulator
12924514e9fb2536357ecb8aa46e74a2	histidine_kinase
1292d4eacf83ab58a612a965e3377ed2	methionine_synthase
12957dbade0dc70de10cdf01ae5f6523	thiamine-phosphate_pyrophosphorylase
129698fbfb8eb805ed43f9c542fa3fa5	aminotransferase_class_IV
129a0e91179b04377de1a5078432b296	TPR_repeat-containing_serine-threonin_protein_kinase
129bdb178ec081cfa69850178d7e1857	hypothetical_protein
129cc4029358b5190442bf318fdf60fe	polynucleotide_adenylyltransferase-metal_dependent_phosphohydrolase
129d6b652375169edef98aa8c5565673	ybaK-ebsC_protein
12a811d67aebcb09d3721816f23fd74d	propionyl-CoA_carboxylase_subunit_beta
12ac292d0bc4c98f9709405ddcd5a0b7	peptide_chain_release_factor_1
12b0907093ac1c94cfd421befe535fae	fumarate_reductase_subunit_D
12b0c5f205afc599bff41d01ea8ee485	glycosyl_transferase_group_2_family_protein
12b7365950421322e7fb483de2b4a3ff	hypothetical_protein
12b82a576ed5ef4e02b1a04e81a081b1	short_chain_fatty_acid_transporter
12ba2684a4186ac7a1524a1af791349e	DNA_topoisomerase_ATP-hydrolyzing
12bcb8493dd9201e1fb0067867d2d6f8	NAD-dependent_epimerase-dehydratase
12bf7c592b446966350a38bbb150aac3	long-chain_fatty_acyl_CoA_ligase
12c0decb87ab8fecb81922576b1e6a3a	ATP-dependent_Clp_protease_proteolytic_subunit_ClpP
12c296b62507cc7e60fc673ff94aa05d	YceI_family_protein
12c3c761b443e78ed1ecd26698a65fec	hypothetical_protein
12cb4dc55dc41f249ddf50f693860275	putative_hydrolase
12cb85a980a52348c17458da42ac462b	hypothetical_protein
12cd4c66591dcbd31dfda457bf1da44c	ABC_transporter-like_protein
12d0d59f2329d2296da2af471ffd98c5	DsbA_oxidoreductase
12d1cb753f65c79d8e234bbf308e31ce	Prephenate_dehydratase
12d435b4a55de99be51800bf91ddb22a	hypothetical_protein
12d509e645416eb3fe62af9a82f32520	abortive_infection_protein
12ddff5e1166f2cd35092f0b99fe7510	conserved_hypothetical_protein
12de87fd4e052d86bf9dc6a79e2105cd	Phosphoenolpyruvate_carboxylase
12debc475d50b234c226585000c0c4fa	cell_division_cycle_protein_48-related_protein
12e46347cef9fc0f20cd3ef04c4c2ae5	putative_MoxR_family_protein
12e486c2581e92831b0ced29d4c64be2	glycosyl_transferase_family_protein
12e6d12f83771e70f5819afde2d35142	peptide_chain_release_factor_2_protein
12e882e1b74f3f2572232d95549d81eb	allantoin_permease
12e8cbd306daaaa60a3fdcd81d8342c1	transglutaminase_domain-containing_protein
12e9f0ff37af460da6f9c89b8a5c6cf3	binding-protein-dependent_transport_systems_inner_membrane_component
12ecef98d5d7dea3b66db5bdae7de3b8	hypoxanthine_phosphoribosyltransferase
12ed85968bb44364bbb438441ead8d0d	protein_of_unknown_function_DUF1549
12ee0d57aac3de829dacc93a51310847	2-dehydropantoate_2-reductase
12ee0d5f97995647b1ae99b051b8ac31	dinucleoside_polyphosphate_hydrolase
12efea48aa9175b8d2cfe2ead5fd3879	proton-translocating_NADH-quinone_oxidoreductase_chain_M
12f01cca47f74bd5f7a182cc70162d8c	glutamine_synthetase_type_I
12f304e87438ca234789c39e6108876e	BNR-Asp-box_repeat-containing_protein
12f4169aeb62296486180107796d2a4d	membrane-bound_proton-translocating_pyrophosphatase
12f99ef9db7973f80fc9eab22af68a10	tyrocidine_synthetase_III
12fbbc6c68a7d670a58b03a1bd633c74	magnesium_and_cobalt_transport_protein_CorA
1301fe0ead59c68887d51919a3c8bd53	Na-glutamate_symporter
1305336cbeb506e248f6fad32551c040	hypothetical_protein
130b97f1ec2a695e0c433bece39b2efa	transcriptional_modulator_of_MazE-toxin_MazF
130ce79892435d8cc708a6fee51325b9	multi-sensor_signal_transduction_histidine_kinase
130cfe673f1d73d1f67425bad20feaa5	deoxyhypusine_synthase
130d319f28a5073f56c62012c3f4e609	30S_ribosomal_protein_S1
130df8641d09ecbf73d3e3f952e08689	CoA-binding_domain_protein
130f6e928464f87d0c36d88d66b1823b	RNA_polymerase_sigma_factor
131046d33e740ed52c5ce7e56bbeed63	acetolactate_synthase_large_subunit
1312c12d034b2fe93125f63b6891746e	methionyl-tRNA_synthetase
13169342a4857b81dbe8b84bb91db578	nitrogen_metabolism_transcriptional_regulator_NtrC_Fis_Family
1317579de4de372b8de078f564c97278	probable_acetyltransferase
1318ae69bf6c44fe76bdcf2c5c001b9f	putative_oxidoreductase
131c3d4a8f7c8ea6e1138b01eb1b2e16	ECF_subfamily_RNA_polymerase_sigma-24_subunit
131e5b9de65337efd8217f4e7d0f0d86	3-hydroxybutyryl-CoA_dehydratase
1320d8360e732c2b3f2b9ca28d7b7475	transglutaminase_domain_protein
13231d5a12e4ddf7aca2a0f0048ed943	regulatory_protein_MarR
13240bfd795114bb3b162105df25c0ce	methylmalonyl-CoA_mutase_large_subunit
1327bb24c0f2dc228b3d1572cc685782	Rhodanese_domain_protein
132ae11c90bb79a2b896cb033ea1e1d2	glycosyl_transferase_family_protein
132da2f2b6ca45756ea1cd7284a60b72	arginyl-tRNA_synthetase
13342b3601bc7b658b50d0eafd23cc03	glycogen_debranching_enzyme_GlgX
1337886476276f2226a0598eca04802d	glutathione_S-transferase_domain-containing_protein
1338849f63087f1e657d7cc8566d105a	secreted_protein
133a0be42a3fa101f45d827a21e85efb	binding-protein-dependent_transport_systems_inner_membrane_component
133ae8493b8229b8312b1045260728ba	serine_protease_precursor
133b478d954ee1e037267d536f00a9ed	glycoside_hydrolase_family_2_protein
133c72eaed49166ab13573bd41f38ac0	phosphotransferase
133d82c1ec0a9e68f9f12215f54d60b5	elongation_factor_Tu
133f3664b6719d52925ea95f870d3cc4	small_GTP-binding_protein
13410c30127dc9c11a1f67abe80f6c77	deoxycytidine_triphosphate_deaminase
134246a35b7d3820493663952f24c60e	putative_GAF_sensor_protein
13475827cc3188d06f96e5fed7d35e50	hypothetical_protein
134adc6ac63e9108b2be1000ee716e8f	serine-threonine_dehydratase_family_protein
135520df150525835447d71b000ea4fe	Mg2_transporter_protein_CorA_family_protein
1355b39a737e37e8f7119a084c0c3d2e	phage_shock_protein_C_PspC
135753fd57d5cfe4932cf235f0a10210	hypothetical_protein
135b1ed30ec2e054815982112224f3c4	FeS_assembly_ATPase_SufC
135d528e5942381d29254961d5267611	FAD_linked_oxidase_domain-containing_protein
135d98645eb63d9c5d5109ec2c4e4ec1	cupin_2_domain-containing_protein
135f3b1266ffc7621098f77b4c5f6775	drug_resistance_transporter_EmrB-QacA_subfamily
135f8ace6a362a05c0c90ae570f292fc	carbohydrate_kinase_FGGY
135ffd83938af424528a924e4b9855f1	deoxyguanosinetriphosphate_triphosphohydrolase-like_protein
1362fe9be251a45e795d73e198038d78	DNA-binding_protein
1368203b8022709b170f78da132566c9	hypothetical_protein
136d35719f232b908873da80e5c3e9e2	enoyl-CoA_hydratase
136d9e4e37dcad90b55318701b361d5b	adenylylsulfate_reductase_thioredoxin_dependent
137136bb9b5e1bd2e3d09371295e0c0d	IstB_domain_protein_ATP-binding_protein
1372b4240133bcf4cc7d67ee891fa0f2	bifunctional_ADP-heptose_synthase
1375a254e0f303226372b744e7c2b514	ABC_transporter_related
13787e760feb57f17c2fae572434aa55	TrkA-N_domain-containing_protein
1379ebb4a0318007d8a96510b77f9f83	transcription_termination-antitermination_factor_NusG
137b79e7e5b3da58437bb0b3869d5c6e	Endonuclease-exonuclease-phosphatase
137c541da1a6638a187c8c7541afe7ef	glycine_dehydrogenase_decarboxylating_gcvp
137d33bbd1eb42b1cab395318f35950f	type_I_phosphodiesterase-nucleotide_pyrophosphatase
137def210902e9c7d05ac8b7dc623e2f	peptidase_M16_domain_protein
138431eec7442066ed937e539bb50ac7	hypothetical_protein
1386239af2ec2b0ba32bacea317d75ec	phage_SPO1_DNA_polymerase-related_protein
138916989cb54df92ab0eb174c9292fc	phenylacetate-CoA_oxygenase_PaaJ_subunit
139039552f486b498a22ba168d8b2ba0	DNA_topoisomerase_TopA
13962898e105ec362f48ce980f05f4a4	ATP_synthase_F1_beta_subunit
139c6ec921870a6aa90cf426c3ff8e90	nonribosomal_polyketide_synthase_protein
139e6a78cbe71360de63943b481d6e7c	Carboxymethylenebutenolidase
13a378b3d2699ce0bc2b5c9687fa8e24	general_secretion_pathway_protein_E
13a39cd04499d0038f50a17c541d7979	preprotein_translocase_subunit_SecY
13a6e94353b0ae6e1b0aca3ac8fbfa72	Aldo-keto_reductase
13a7d06195f2aedd1ea647c6bf52a832	tryptophan_synthase_subunit_beta
13a924c4c0b42dd398c2398e0d7c3d20	ECF_subfamily_RNA_polymerase_sigma-24_subunit
13a9f7744640e0cb90225e6fe624d9b4	transposase_ISAs1_family_protein
13b45f2322f03e56fc008a96aa87c011	DNA_polymerase_III_subunit_alpha
13b5d6256615d8e7b324b294e1040932	hypothetical_protein
13b8aea82ea1f9232cccb39e8e9e2a33	cell_division_protein_FtsW
13bb5b64072d359bba066051025d0788	AMP-binding_domain_protein
13bb6666089cb9595f4ea95d52d0a1d1	short-chain_dehydrogenase-reductase_SDR
13bc93a61874cc6ed199dfcc7a71b669	alcohol_dehydrogenase_acceptor
13c5e0e571e3a070d5da315299a4ea86	fumarate_reductase_iron-sulfur_subunit
13c5eb61001053c6672aaf4de32da6b9	NADH_dehydrogenase_quinone
13c7b87d445b181dc18ecde49bd8fe87	HNH_endonuclease
13c911f5b3145ed83bdc59cdd5b547eb	NmrA-like_protein
13ce44843dd68c6c3e89777e6e1adccf	ATP_synthase_F1_alpha_subunit
13cf3992178fec0f0b1adc5254ae4307	putative_transposase
13cf9f27c1605f0a8dac7ace7b675770	thymidine_phosphorylase
13cfbcfd1fdd0f2f025f228ced0501c2	hypothetical_protein
13d6f29f5430066767efa7201396d937	indolepyruvate_ferredoxin_oxidoreductase
13da4aeb67c31d74539b12d7f5c3bddd	ABC-2_type_transporter
13de7a371b06480059a376e088577d94	hypothetical_protein
13df409be15887283268d59e451da35d	hypothetical_protein
13df732006e1ac20bf29928e54220f70	acyl-CoA_dehydrogenase_domain-containing_protein
13e17c1e39365a58e24ae35f18dda569	Cytochrome-c_oxidase
13e38822b2b3dd5a137ffcaa640ab2b0	UDP-N-acetylglucosamine_2-epimerase
13e5234b32e8752751e10c53cadd0e71	hypothetical_protein
13e6c786e601d608ebd36d6eda33944c	asparagine_synthase_glutamine-hydrolyzing
13eb85bc1d2a1b33aebadf44e237a396	metalloprotease_FtsH
13ee4b333adf364df5eb141f3f2747fa	peptidase_M20D_amidohydrolase
13ef65a371c09fe8f4f6871984f720a1	creatinase
13f18dabe85c8066c6ec8be02cd4c033	hypothetical_protein
13f87e6452764c3b656c9104e50df8b0	methionine_synthase
1400d8c6d32dbdb218b85bd052c879d1	polyphosphate_kinase
14019b124fd13ba9e85e064ba52b4824	Non-specific_protein-tyrosine_kinase
140dabf7776bea44bdb945a2ee6266eb	putative_glutathione_S-transferase_YghU
140ddfa3ba836fb19189222202d1f312	tetrahydrofolate_synthase
1411d7e2dac34e79d5875fede07d777e	membrane-bound_proton-translocating_pyrophosphatase
14122dc669dfb4ba9c949ad7f59290c2	sensor_histidine_kinase
141292fde15929746e05362d9fb563c4	response_regulator_receiver_protein
1412cded298392a937e631db3653f453	glucose-1-phosphate_adenylyltransferase
14148bf9cb2f5008e1d9a6e94b03f6ad	hypothetical_protein
1419b172abc5be05bc4715592f0a0e9d	malate_dehydrogenase
1419f9fbcc35522adc3a7c0853014165	thiamine_pyrophosphate_protein
141b919dc5577ea1035abbc26e0e7e29	peptidase_M20
14227b2fffeb1f301e44d920a3c80f67	sensory_box-GGDEF_family_protein
142763a11574be7511e9d76222434877	Activator_of_Hsp90_ATPase_1_family_protein
143bde5443702236fe77b0bf6f4cdaac	4-hydroxyphenylpyruvate_dioxygenase
143e2d78970b535f7abbaf7297c4a823	Bmp_family_lipoprotein
143e87f2eab9a7d3cd3a787dfc638942	delta-aminolevulinic_acid_dehydratase
143e8838889acdc48f1dd066a72eccc1	beta-lactamase_domain-containing_protein
144119c5ea6d34286d0a960750f63fc6	isocitrate_lyase_AceAb
1443419fc8a35110ebde6f87ebd3eb9a	carbohydrate_ABC_transporter_membrane_protein
1443dbdc49100048f8429aac6ab38b70	hypothetical_protein
14457797845a79b2a558ce10a1511eba	Short-chain_dehydrogenase-reductase_SDR
1445c2b863e9cf84897caf7ca09f41e5	CemA_protein
14469e00ce524f9ef8c37eb0217e30f6	50S_ribosomal_protein_L22
1446f816db2ea77158f14f3e806d15d2	2Fe-2S-binding_domain-containing_protein
144c347e8c415f60dc45fa936542a1c5	ATP-dependent_Clp_protease_proteolytic_subunit
144c529ee1028c56995027bf8e71dd0d	hypothetical_protein
144c726e815b4c287850e891c55b2bdb	50S_ribosomal_protein_L13
144cd65e4db0d424799898de041a4391	potassium-transporting_ATPase_subunit_A
144d30e9c89295edc69a33aa0f9b144b	hypothetical_protein
1451206e6e143062ad99ca1144ab20f8	L-carnitine_dehydratase-bile_acid-inducible_protein_F
14517a1f64b4431e0c201a3c8dd3a968	fumarylacetoacetate_hydrolase
14545c590dfd15e8dae13a8a1e1f4454	Undecaprenyl-phosphate_glucose_phosphotransferase
1455ff27a232ac2a1d03f6e322a11218	hypothetical_protein
145724e38e9583cfb9611a841cfc9e33	ABC-transporter_polyamine-binding_lipoprotein
1458419c7e17d29f8df6c7c7587547b5	ribonuclease_D
14586c26cf36b87138b6554322eb963c	hypothetical_protein
145a53aeb451fc0e7a6592a5c99db98b	DEAD-H_associated_domain_protein
145c36abc11ed1622e19f638d6452e9d	transcriptional_regulator_MarR_family
145e136ba8c8732a57fd45d1c928fe8d	lipoprotein_precursor
145e3f285f8fc138076f1a6d8df1d3ae	excinuclease_ABC_C_subunit
145f2c568379702c222935d0e3493bde	response_regulator_receiver_modulated_metal_dependent_phosphohydrolase
1465d7bfedb9c5a398917b49dcd0d270	transglutaminase_domain_protein
1468092fae1f0bf4c6fa02aa91b8a6c1	hypothetical_protein
1469496e63768b237aaa47396cf49d77	sensor_protein
14696b2be0bd0873408eeb2a5134b003	cytochrome_d_ubiquinol_oxidase_subunit_I
146bf9de8f02287c4539a818399bf7f5	hypothetical_membrane_protein
146f74c93e60a6c5abf0c6470d57076e	ferrous_iron_transport_protein_B
147e7f3a8e9a77b1cb16bf963ccd1186	FHA_domain-containing_protein
147fb0f45d4cf02433ad7c09b50906e5	hypothetical_protein
1483e0a6b68bc79951688b44e9fc3cbb	uridylate_kinase
148a543f1085149847172b2b6ae9f5b5	glutamyl-tRNA_synthetase
148bcee134549d604b2d3bbb612590e6	TRAP_dicarboxylate_transporter_DctM_subunit
148deba024e6b4e50f921ceac4053453	hypothetical_protein
1496ec455784754e56fe5e9dd9192505	peptidase_M20
14976f5f0dc7002ad380965bd5e8ef21	hypothetical_protein
149abf80fdf933744d39fe8a3f4290b0	DNA_topoisomerase_domain-containing_protein
149d63449ebc3f7920ece45a0c46bedc	gamma-glutamyl_phosphate_reductase
149d83c9feb64e613a6aa547c74a02c1	diguanylate_cyclase-phosphodiesterase
[truncated: 17,783 more rows]

## Sheet: Intersection soil-ruderal
MD5sum ID	Refseq protein
0001544ed073a2fc4fbaf0f5255f2b16	bifunctional_phosphopantothenoylcysteine_decarboxylase-phosphopantothenate_synthase
0001e05fd22fb2fee5c66d3bfc20f4d7	DEAD-DEAH_box_helicase_domain-containing_protein
000303b935540473ca31be2312765ad9	LacI_family_transcriptional_regulator
00091fd2162738cdc4da072187ec79aa	hypothetical_protein
000a274d1f281fe865b710278b5a7286	binding-protein-dependent_transport_systems_inner_membrane_component
000ab24f6dd4d56fc2aac03f8ecd353c	hypothetical_protein
000d9afd2dde083d470eb9c8ea33b080	L-lactate_dehydrogenase
000e02dbe015e29f06ef6b369887133f	TonB-dependent_receptor
000e50c30936cb0b7e77bf8dd87fbaf7	PAS-PAC_Sensor_Hybrid_Histidine_Kinase
000e89a93caebe089232fc935ddf2982	AsnC-Lrp_family_transcriptional_regulator
000fccfe7829cd02ef3c8bdcf8c0b17e	protein_TldD
00108c52ce72909a70948c5346717af8	UDP-N-acetylmuramoylalanyl-D-glutamyl-2_6-diaminopimelate--D-alanyl-D-alanine_ligase
0010ed7c1856e8930f1b0890bd3e53a8	transposase
001151bac0f8cea0691ebb348f16d5e0	SSU_ribosomal_protein_s6p
0011cc9d5e34869f13742c1938a6754e	short-chain_dehydrogenase-reductase_SDR
0012198bd40ae029ca8be451a9f59c08	GTP-binding_protein_LepA
0013b83a784bc8cecc930a4b4eb64b07	DNA_gyrase_A_subunit
00163734be6f43921bbd2a369df5a06b	Membrane_dipeptidase
00163c06e165ee0a2469bd71766a8321	deoxyhypusine_synthase
0016e2ff61dee8b4f2faf6b05350132e	hypothetical_protein
00170efd050072952710f6b899417f05	ResB_family_protein
001809a72a78eae86c1f055d7af88b07	ABC_transporter-like_protein
0018fe13d31a4a414d19d051d04c0fa4	recombinase_A
0019b95e8cfb0d846415e027f4c60a68	hypothetical_protein
001c64cde521f8cc4fcebfa5131a4ac4	IS4_family_transposase
001d1b24dc47376745ddb605433a255b	phosphoribosylaminoimidazole_carboxylase_ATPase_subunit
001ee6ebdba06d3349b5d11dfeaf09f1	RND_superfamily_protein
001fd205cfd3d5fc6b23922420b877f1	GTP-dependent_nucleic_acid-binding_protein_EngD
001ff9d42916d39a0258bd4d42578eb6	putative_glutamine_synthetase_glnA4-like
00206a93355dd62bd13c46260fd9bea1	NifA_subfamily_transcriptional_regulator
00220011fdf19f99fced1d7a237c3c41	phosphoribosylformylglycinamidine_synthase_I
00229c4c729064780572a49f65c65703	putative_ABC_transporter_ATP-binding_protein
002322090b4ce1d2090f18e9cd51c70b	small_GTP-binding_protein_domain-containing_protein
00244864b82ac97c0bcea8d244f60067	hypothetical_protein
002448918bfe6c4c8176c18152ad1dad	acyl-CoA_dehydrogenase_domain-containing_protein
0024aa3f1fd81871616cf1ec6e293a9c	histidine_kinase
00257da4829bc85434eaaf5095215734	FAD_dependent_oxidoreductase
002696cd88c1ff70575d25fc627729b2	ABC_transporter_related_protein
0026d4950376bb3a3853466bf8fc817b	glycosyl_hydrolase_family_3
0028af635574ad1cffd0bbcd7bcfc590	hypothetical_protein
0029451eac443d813bc91bacf18dbe74	hypothetical_protein
00296a28f4fb686a5d5ace95b44db87e	hexapaptide_repeat-containing_transferase
002c33a4da30841853c12f2a1d4d93a5	methyltransferase
002cffd2d0d9372268118452a161ceee	signal_transduction_histidine_kinase_nitrogen_specific_NtrB
002d6fdaee4b35d9e08e4e14665b3e1e	hypothetical_protein
002ed08e9afa67110f89d5359e766aa3	two_component_transcriptional_regulator
002f08675277a985eba1cf8622b95def	Alcohol_dehydrogenase_GroES_domain_protein
00306b3505f06d4bd1d6d959c5e88d9e	two_component_transcriptional_regulator_LuxR_family
0031d53c1021f4213e59950abeacc512	deoxyribonuclease
0031f4eb0a1d64844bf25a06308ed9d4	hypothetical_protein
00339e13a9ca7d946bc6cee880dbf8df	NUDIX_hydrolase
0033a083573a51d503b512dcc38e47c5	indigoidine_synthase_A_family_protein
0034456a46ba315177dedc9ad3ae49b4	Protein_of_unknown_function_DUF1974
0035b1a7581d5e580cc6285f58587f86	hypothetical_protein
003628002132053de9d946d828c2aa75	CtaC
003a6fde22f6cf8ec478a01b59308d78	oxidoreductase
003a747f53d405f03890da8ec345654b	phosphogluconate_dehydratase
003c2245f6dca81873fa19dc82b27eea	putative_ABC_transport_proteins_inner_membrane_component
003e6a165ef2414c5f01578d15d5a33c	NADPH-dependent_FMN_reductase
003f3527a371b50638f187949c2f37c4	dTDP-glucose_46-dehydratase
0040152b148e2cd2eaab76fa4a3f47b7	50S_ribosomal_protein_L5
00401df3f67b74d81ef4f19d1ce0c275	putative_ABC_transporter_ATP-binding_protein
0041323e65ebfedc863b3b9c98a1fbf2	thiocyanate_hydrolase
00413ec283af8cbb7f650c8df09869c1	phosphoenolpyruvate_carboxylase
0041a8ab9f91ed4bb7ec3710c9df876f	Chaperone_DnaK
004260f7c741051d918ba44cfb7808fb	non-ribosomal_peptide_synthase
004423dab064d2da13cea7098631b78b	hypothetical_protein
0044ece1ff777dd781aa129e973aa031	radical_SAM_domain-containing_protein
0046564b4498e176e0959a5feb11371b	CheW_positive_regulator_of_CheA_protein_activity
004b39bf974f59500beaa31aebbb5cfb	putative_transposase
004d0b82d91e00f35d85c4aa33a83766	1-hydroxy-2-methyl-2-E-butenyl_4-diphosphate_synthase
005091ae7998bc0751f3f14a41062f25	porin_precursor_domain-containing_protein
0051aaf7367608da6e888d18eb6e2f7a	short_chain_dehydrogenase
0055919346c001665398dad8102df4ff	peptidase_M48_Ste24p
0055e5503f2631441f36f0975cbefba3	citrate_synthase
0056aea83ed748121ebb8a4f3f18ea0a	hypothetical_protein
0056c413bac2bbbe2dfa0e8b0715b97f	elongation_factor_P
005803839a282f81488cec0b753a7aae	putative_maltose-binding_protein
00583a4001a49ec1d9110960570e5bd3	dehydrogenase_family_protein
0059a93739cdc718fc189f05b68017b3	recombination_protein_A
005a68ec8d7c846ff42e20f133a8cbd7	peptidase_M50
005a8b1c3a112f8dbbde3000fcd8ca10	ABC_superfamily_ATP_binding_cassette_transporter_membrane_protein
005b68dcfcd915ccc44ebc47cc3af47c	hypothetical_protein
005b6ed57fdac53c612d4c1b3be2c8eb	monooxygenase
005bd8ca526a65601c76fcf7c06bbc0d	50S_ribosomal_protein_L21
005c4b1fac3e4de7a4a683c7670dc59a	extracellular_alpha-helical_protein
005f0988ca890f54df7a00689a9015e8	ATP-dependent_helicase
006061a19a39b8ada0eba4893d6f4d50	tRNA_uridine_5-carboxymethylaminomethyl_modification_enzyme_GidA
00616d85799d00391eaa80ca73cb29b2	LOR-SDH_bifunctional_protein_conserved_domain_protein
0061b60db33c4662bd60d52a20968f3c	hypothetical_protein
0061fe27d3c99d66b78f21ad190385fd	OmpR_family_two_component_response_transcriptional_regulator
0062af11a3a9b7f3fc095062dadad1f2	two_component_regulator_propeller_domain_protein
00641f9fd97504ed57c477022e9aba75	cell_division_control_protein_48
00656c3d828425790c8ad92d91b6334a	serine-threonine_protein_kinase
0065e5a875ddfc5d47e11e27a2a4c676	hypothetical_protein
0067c695e21ca9ccdf90e008b5580791	peptidyl-tRNA_hydrolase
006843a673da30fae15301b4fec622ff	regulatory_protein
0069432d2d1fd722e3ad0d7d2b1f7fd7	hypothetical_protein
006b37c7a7d33001c50f400fbe355c70	DNA_topoisomerase_III
006c700970bf814db832b1324e45ccf0	seryl-tRNA_synthetase_1
006d0f48f4dcfc8d69345b5e3a3d7bd6	isovaleryl-CoA_dehydrogenase
006fd5c165556eac68d9dab13c099339	hypothetical_protein
006fdc3a92e1b7ad446e4ddddc81d6d6	glycoside_hydrolase_15-related_protein
007059600ba25cef7e79fe971d623180	NADH-ubiquinone_oxidoreductase_chain_L
0070a50a0bead99d07bc11814c4ff739	putative_glutathione_S-transferase-like_protein
00712c67cc9771e2b7cc11bdd79c5512	probable_exonuclease
0073a286588d66d8f26791d88cf5495e	Alkanesulfonate_monooxygenase
007478d82ff997dc7eb42f8638225eeb	2-nitropropane_dioxygenase_NPD
0074eea3e24deddc3458b8688ae93f77	cell_division_protein_FtsZ
00774d402b053b17cf7fa6e4348b49a2	5-oxoprolinase
0077d82ffc3f14dc939b3a24cafb3262	oxidoreductase_molybdopterin_binding
00782e30bcd2683159b004092c4444a4	4-carboxy-4-hydroxy-2-oxoadipate_aldolase-oxaloacetate_decarboxylase
0078a412eefc7df5208c1ffb40427821	ABC_transporter_substrate_binding_protein_dipeptide
0078fc802931b1bb2413496e2344a4e7	two-component_system_sensor_histidine_kinase-like_protein_Ntr_family_protein
007b4357ee5da1527c0232d4ae0b1ea9	ATP-dependent_protease_La
007cdff07f8d9afd836e610631ad881e	putative_oxidoreductase
007cefe880a62698bc37d59155a6f57d	NADH_dehydrogenase_subunit_D
007d15af895ca9efc3814d6bdff9f7cc	phosphodiesterase-nucleotide_pyrophosphatase
007de696a22fe462b0dc28b4c0f51356	chorismate_synthase
007f0315046e1929f337c428cdd29869	HI0933-like_protein
008236e0abf3cc6887cac6eece73d6b2	binding-protein-dependent_transport_systems_inner_membrane_component
0083a40755eb0710a0af8d06d7f93b4d	hypothetical_protein
00860a6ad4a60fbd56ec689709d67ef9	putative_2-5_RNA_ligase
00866fd66dff2c357062d5efabe2810e	hypothetical_protein
008b95505cd0c468a7e355d1e2c980a5	protein_of_unknown_function_DUF1479
008c88948ea3f7b463d46fc9dc0e8738	putative_atp-binding_abc_transporter_protein
008f6bc8f44001cd37d520b504c563c4	hypothetical_protein
009092a92cec1882b79db89494a7325d	monooxygenase
0090993bb1e83ace88f59db9ff4a9c39	phosphoadenylylsulfate_reductase_thioredoxin
0091f33324cb63efd973d8967a2ae853	DNA-directed_RNA_polymerase_beta_subunit
009614cca4e03ca2a620bf660b8d2a9c	homogentisate_12-dioxygenase
00964b4b99f5166d4a84eb73a0bb3640	ferredoxin-dependent_glutamate_synthase_1
00967118ef294cab899bd09d6e455c30	Nitrile_hydratase
0097a0018aea54d7ca4797228f1c9a83	GTP-binding_elongation_factor
00990c7201d23b55a83eb83e792a9fb1	molecular_chaperone_DnaK
009b92bc4af760ee891ac958f5412a2a	hypothetical_protein
009c91bec37422112ed5c6e787584a27	ATP-dependent_Clp_protease_ATP-binding_subunit_ClpX
009cd822b8e2c5d46885bb05648064ab	phosphoglucomutase_phosphomannomutase_protein
009d1bb5463465d83ba7cdc39f171a9b	endoribonuclease_L-PSP
009d817051c7028f76485bf7ad90877d	cysteine_desulfurase
009f42c1d96cbb4f3c342459f3257895	family_2_glycosyl_transferase
00a00991d2b8d3b3f7280173b687a61e	ATPase_AAA_family_protein
00a085fa89614115e5f466aadbdaddf8	Amidase
00a15508f281ba923cda7b43348f24b9	NADHflavin_oxidoreductase-NADH_oxidase
00a288a5b6046ef22916e2d55dd7c176	anthranilate_phosphoribosyltransferase
00a477bb8c6a6f5e3776c186c3dfe172	DNA_repair_ATPase
00a4ad4192492885c3904ddbf107a193	putative_ribonuclease
00a51d302beba9fccbf76e2c71b7b92e	hypothetical_protein
00a586f693711749870331819e96cf5d	ATP-dependent_chaperone_ClpB
00a63e4733849edff7f6c4dfd7e92f16	histidinol-phosphate_aminotransferase
00a6fb8804e08fc1eb8256f95d04ae67	hypothetical_protein
00a9372f96bf5cc4946ce02af38f84d4	DEAD-DEAH_box_helicase
00aa4188118e3d3512c23cc9648cd5cc	serine--tRNA_ligase
00aa7922ba9f71a8a4298d03a2acd5e3	Enoyl-CoA_hydratase-isomerase
00acd684906694fb9334cf9213009bc9	hypothetical_protein
00acfe2185e2ef8e32a6f148c429efb2	hypothetical_protein
00ad9ff3f8401fd09e2f21cd5b78b93f	transposase_and_inactivated_derivatives
00aeccd7a6c190eb679ee47636cdc9cd	alanyl-tRNA_synthetase
00af360b517c6150ee3ce462a04f123c	aldehyde_dehydrogenase
00b0c53ad9d3849108c7402e4fbefeca	hydroxymethylbutenyl_pyrophosphate_reductase
00b1e837d24721efb1de1729c36120ce	major_facilitator_superfamily_permease
00b3dc537cd9dce83dc1d467cfe3ba6b	Luciferase-like_monooxygenase
00b4cb13609691c537855a60488b24db	DNA_methylase_N-4-N-6_domain-containing_protein
00b4de596b4dd909aa53cc06de6bd7f2	hypothetical_protein
00b59cd91c3ebca0aa48a5747ca6c01e	histidine_ammonia-lyase
00b6723c9ca10f14eea67bba83bf8888	succinate_dehydrogenase_flavoprotein_subunit
00b78ddd95976cc91d1beb35e867b491	30S_ribosomal_protein_S6
00b887eb31468a25bcf0b553a172c363	large_subunit_of_NN-dimethylformamidase
00ba51755fb091e34dc442b8b87436b9	acyl-CoA_dehydrogenase
00bb66297b3194f299d76b82b9c62574	DNA_polymerase_III_subunits_gamma_and_tau
00bc6987af3b5ac22cf21f4382cb3213	putative_phosphoribosyl_transferase
00bcbac31c943780aae8e7102526a774	cytochrome_oxidase_assembly
00bd46c8a95d67e393c5b65ad943a64e	glutamyl-tRNA_reductase
00c2b8e25adc9646b02cf60d74b5c76d	OmpA-MotB
00c466e60130a026766f5a9aabf32701	methionine_biosynthesis_protein_MetW
00c49b7485541ab043435cfc74951170	invertase-recombinase-like_protein
00c6f4a95782e825b263c41720a57375	acetyl-propionyl-CoA_carboxylase_alpha_subunit
00c7ca5ba83de5aab8d457190d16e63b	major_facilitator_superfamily_protein
00cb1b2df10efcf11fdb367dfa71c26f	4-alpha-glucanotransferase
00cb7e4df84bbff0e80120f94a2e6ea9	hypothetical_protein
00cc1f9bb194bb6cb6a5cebd02fbb2a0	ABC_transporter_related
00cd598d53db7a8b0ce6cea3679561b8	multi-sensor_hybrid_histidine_kinase
00cdba1ad939a1b0c6a2f7b0876b4959	OmpA-MotB_domain-containing_protein
00cfbf7ed60986f72fb0cf330a8fc35d	hypothetical_protein
00d0c7a067b3034f6ca0a64a6dc42e6f	acyl-CoA_dehydrogenase_domain_protein
00d10566a418c7d5b28db0b15372b757	Polyketide_synthase
00d10b45cb6face66a5b6b94ce47d1ff	NAD-dependent_aldehyde_dehydrogenase
00d2d81ec4b2f89c8c11da765bf71ed3	F0F1_ATP_synthase_subunit_beta
00d365eacf8a39b9b92a82c66d05b886	preprotein_translocase_subunit_SecD
00d3a261a955daf99ee608806047143f	peptidoglycan_glycosyltransferase
00d44ff7e36fe58ec935c48e8e878e5a	hypothetical_protein
00d5f7eafb564e9f7075a9f1c6eabe86	hypothetical_protein
00d626db321c9224777a4a49a4a667c3	acetamidase-formamidase
00d64fac6c0d961ba3be403ba19f17b9	hypothetical_protein
00d7f85437e6d12dc17bbc87835e86a9	xylanase
00d801426e41fc8757b4027b51b0e37e	ABC_transporter_permease_protein
00d9e86f34937b014c913bfb0c660388	50S_ribosomal_protein_L2
00da2a2993094de250624a6ef8192dd4	excinuclease_ABC_A_subunit
00dac1d5138297537ca2a7780078022b	transposase
00db3a04a2e6b38ca784cf69292fa7a6	hypothetical_protein
00dbea744da64b0efff8c214a5f63025	hypothetical_protein
00dd6ca985c30bf285ded8a525dc64ff	phosphate_ABC_transporter_inner_membrane_subunit_PstC
00de1d4ac9185419f5904fa54cfd74d3	34-dihydroxy-2-butanone_4-phosphate_synthase
00dfdad42b719e26e5c8efee8b894442	aminopeptidase_N
00e15c886559d66d0f89c0437df40682	putative_cation-heavy_metal_efflux_system_protein
00e32214694ff005ab17342afafede06	hypothetical_protein
00e3c221490a0f11f1619f85e41b9aa1	cystathionine_beta-synthase
00e3d2335a366484288fa77e355ec202	putative_gamma-glutamyl_hydrolase_family_protein
00e490d37479e220034b339182776a1c	alpha-N-arabinofuranosidase
00e5ee1f4f11cf810eae420991353f37	ArgE-DapE-Acy1_family_protein
00e8b8691936d90c8db9113552e6df54	transcription_termination_factor_Rho
00eb407aa4e21650d307d8c25781d197	ABC_transporter_membrane_spanning_protein_xylose
00eb800101d838cb5451431550e989f8	30S_ribosomal_protein_S1
00ebf2dd9d8bb5708052e5128d044eff	aspartate_carbamoyltransferase
00ec06542524505db80da435e27e6b00	30S_ribosomal_protein_S11
00f01ea6b4f6f7135f197dca3c0307e3	hypothetical_protein
00f04d867948119c2576d5afee3b2f23	two_component_sigma54_specific_Fis_family_transcriptional_regulator
00f169666d3fb769836d91bb29a50aac	Phytanoyl-CoA_dioxygenase
00f1e157bb00dde3840dff28b9f05ec1	short-chain_dehydrogenase-reductase_SDR
00f65cab7e7b1277197dcb211cc3d2ca	IclR_family_transcriptional_regulator
00f6c8e5d281049ac09a84e2a6e3dbd6	enoyl-CoA_hydratase
00f8d02f83e126b759894498d50ceca0	NADH_dehydrogenase_subunit_C
00f93cb97fdd5251a21c55f7c1ed63a8	thioredoxin_reductase
00fbd517b5695a05961b1e0c5c1dd26e	drug_resistance_transporter_EmrB-QacA_subfamily
00fca35494aa802a2105ec5adf456e0d	putative_ABC_transporter_ATP-binding_protein
00fdddfc9f0348d65672d3112ebf7d57	anaerobic_benzoate_catabolism_transcriptional_regulator
01012267ae06d6e1fa5d2c1b97d5fb72	dipeptide_ABC_transporter
01012d8e009b7d687d35e03ecca575a2	trehalose-maltose-binding_protein
0101c65688d3da893e867215e227cb6d	acetyl-CoA_acetyltransferase
0101c717b07278f337ac30012c2fe479	spermidine-putrescine_ABC_transporter_ATPase_subunit
0102109165836a6f65c9a12824f1a432	hypothetical_protein
0102da3cad18c7e541643fcc635328f1	ATPase_component_of_ABC-type_branched-chain_amino_acid_transport_system
010374c7941458e3be7021accc17076f	dihydrolipoamide_dehydrogenase
010382418318f91b93ac82ddec79a7f7	integral_membrane_regulatory_protein
0103e2374c398aad31e67fe7a8f3c2ef	peptidase_S8_and_S53_subtilisin_kexin_sedolisin
01041b6316734e8868bbd19ed1ce4ed1	dead-deah_box_helicase
0105d83c471c84d40aba9dc71119f485	resolvase_domain-containing_protein
0105efc1930537c819a0a492d72d3b14	riboflavin_biosynthesis_protein_RibF
01080543922dd76a9cfe0d5d4fe2dc92	hypothetical_protein
010aea60cb21b2e422eb2e16c0afe50a	hypothetical_protein
010b7f7e5eb1b8454f36ea7edcdb7f2a	hypothetical_protein
010be3f5179be890548e9553a9812955	NAD-dependent_epimerase-dehydratase_family_protein
010de94caf91cdcbb791ab828fa41e63	snf2-helicase_domain_protein
010f47de3935e16f09a8357da91fadd6	Glutathione_S-transferase_domain_protein
010fa80e87e08b9dbcef9e1b90a456fc	cytochrome_oxidase_subunit_I
0110dedfccdc969f9cbaf331d9dafe08	hypothetical_protein
011170356372bbed54515271744dc130	hypothetical_protein
0111bcb03bc5273d0004e0c23f5e3801	50S_ribosomal_protein_L14
0111ca04383243efff61b1e577861f9e	hypothetical_protein
0113419338d2e6b08fe503a2b487cba6	diacylglycerol_kinase_catalytic_region
0113e5ff46387d86b531381042dde048	RNA_polymerase_ECF-subfamily_sigma_factor
0114476d874d5c178c8cfc3d5af3d59d	phosphomethylpyrimidine_kinase
01147a462130d38ec68936afcd607f85	hypothetical_protein
0116413ad99491425193fdf5665f6c10	ribosomal_protein_L2
0117164b2998b4ffd1a61a4a04adc029	hypothetical_protein
0118917371902062ae6d63fa9441b91e	beta-ketoadipyl_CoA_thiolase
0119243519b51eff6e50cc9f228aee44	NADH-quinone_oxidoreductase_subunit_G
0119f72f973f565481f9b833b346424b	acyl-CoA_dehydrogenase_domain-containing_protein
0119fb10882eedc4ca8b68b0b2250d1d	beta-lactamase-like_protein
011a27eac10b162340421405ea58a0a1	DNA-directed_RNA_polymerase_subunit_alpha
011a427b4e5b383ec43db2632293fb8d	50S_ribosomal_protein_L13
011c0fac532ae69842817a5cdf3e8219	DNA_gyrase_A_subunit
011c304eea2cac263288c5d2468a57cb	hypothetical_protein
011ccac3e5931e1661165910ef029816	Helix-turn-helix_type_11_domain-containing_protein
011d3df69858a2f64fbc272382f1c53c	putative_two-component_sensor_histidine_kinase
011eed6212db2599b0400b551f372c8c	sugar_ABC_transporter_permease
011f35195fe8470897e72514be85a95a	glycosyl_transferase_family_2
0120a4d91081b099fa4adc0918361c2d	Methyl-accepting_chemotaxis_receptor-sensory_transducer
012560fed9ec22bae397e684b08ee984	polyR-hydroxyalkanoic_acid_synthase_class_I
012649dc4bc9ce30495017daeca50683	predicted_secreted_periplasmic_protein
0128fc1639e6b3cee9fabd571605b78a	ATP-dependent_protease_La
01292870f9b790f13d8002da2af2c13d	ABC_transporter_related_protein
012abb26de872b12f589480806819494	ABC_transporter-like_protein
012b29611599d0308c9dc18ebeddb175	DEAD-DEAH_box_helicase_domain_protein
012bc885000d5077aa2da6c297f4cab3	two_component_sigma54_specific_Fis_family_transcriptional_regulator
012d54c311038e7b625187d7df9f5c29	DEAD-DEAH_box_helicase_domain-containing_protein
012e091f89c4a62ebc10aab698a17d2f	DNA_translocase_ftsK
012e3eb250b53d74e51f25c415685efd	enamidase
012e94d26ac4cf31778e1511979e8c92	ABC_transporter_permease_protein
012ed8924c72602f7f6a7fc68390b874	Alphaalpha-trehalose-phosphate_synthase_UDP-forming
01313565be1fe8f0c9d0af8cb62d6597	ATPase
01323d8ae610bb16415e48232cba311d	folate-binding_protein_YgfZ
0132faddd45862c7fd16063cf8974dd9	peptidase_S1C
01338f23b8bbd625e83fc1337110a3df	aconitate_hydratase_1
013440770be6807b96cbb9ead2f90a52	diphosphate_phosphohydrolase
013547ca860818799d077683e70ed03e	hypothetical_protein
0135d440eb75c9ad270ca765921c70d9	glutamyl-tRNAGln_amidotransferase_B_subunit
0136b52a5e02c11b52731564552386ab	cell_division_protein_FtsA
0137f6ecc201a94b6303af27667ddb73	cytochrome_c-type_biogenesis_protein
013964bd5418528cf7a204fc79dfc660	hypothetical_protein
013a645545a88e82d35a69b695ecb223	plant-type_carbonic_anhydrase
013a7360982ccc102d627db64055ebbf	hypothetical_protein
013a7377b445917e1429c57293db37b0	two-component_system_histidine_kinase
013ab8afa3d66d9c06acf691e8e46958	aldolase_II_superfamily_protein
013ac6107c345dc905fdf3bedba77d45	imidazoleglycerol-phosphate_dehydratase
013ee0d630be84f9bfdc940417a621a0	4-hydroxy-3-methylbut-2-en-1-yl_diphosphate_synthase
013f466ab7cd21bb1ccef20bc077653e	phenylacetate-CoA_oxygenase_subunit_PaaB
013fb5d5d1519615dddbfbc4420dba22	putative_NADP-dependent_alcohol_dehydrogenase_C
0141165e6a8c21a98292ce00a73c6389	mannose-1-phosphate_guanylyltransferase
0142554c9dfdc93246939b5e161ac0d2	Serine-type_D-Ala-D-Ala_carboxypeptidase
014284b1c662dd33b0584d252205ee01	asparagine_synthase_glutamine-hydrolyzing
0143afc4e496f1df6f5f3002c6efbc94	NADH_dehydrogenase_subunit_L
014591594f3d45048700080c385a9e59	glutamate-cysteine_ligase
0145c30427fb2aa8b44d5a53b9f8261d	L-aspartate_oxidase
0145d42947f2d8314064f62e4f17cff6	sporulation_related_protein
0146374a89a5827fe1cd3fd6ef4d40e7	conserved_hypothetical_protein
01464e8514e05f82d369073c3f1f2228	hypothetical_protein
01481b3d093a75de4f7f327e939c18eb	FG-GAP_repeat_protein
014840a678b823ec76326eed59247b72	glyoxalase-bleomycin_resistance_protein-dioxygenase
014abd45993d629e68ccac9583917241	ribonucleotide-diphosphate_reductase_small_chain
014aee7fcceed827f43af62343bc122c	putative_lipase
014bfbc7f800a4e6abcd2238e69ff6d3	pyridoxamine_5-phosphate_oxidase-related_FMN-binding_protein
014cd7cafa04b09ebfbc3ed5c880643c	FAD_dependent_oxidoreductase
014d3c4a15cf19c9405b2a102a985ff1	L-threonine_3-dehydrogenase
014db06b6a77fc583db8b82cc7cbf453	putative_fructose-16-bisphosphatase_II
014e3e94b9f55561924e2023103b2aa5	formate_dehydrogenase
015071ff373a679487172271927e82ce	endo-13-beta-glucanase
01507ad7619386a3e095a312def19b99	hypothetical_protein
01519c0ee6c1ae6fbc153ad1bb72adf1	Triose-phosphate_isomerase
0151b3bb4d8a93dfeca03ddd745a0e91	hypothetical_protein
01530dc15235fecf52d0c9516c499104	zinc-carboxypeptidase
01537722dbcfdfb4aaaa200aa97b9690	thiamine_biosynthesis_protein_ThiC
01579e939cd489a083d91e79d5202790	CoA-binding_domain-containing_protein
0157b12e582aa9753d131ad43936be46	ABC_transporter
0157c9a5b35aab87288e5462fd37b1ec	hypothetical_protein
015b2dd0f7a5bb5db85a37515d202cfa	uracil-DNA_glycosylase_superfamily_protein
015fbb1cf12786ab48317366859bd438	glucokinase
0162fb348462bc8a0fd5740875277845	hypothetical_protein
0164bb597639d609cffaf888c39a094a	protein_of_unknown_function_DUF1793
016591cc28ea9c3bbe770b73a661395b	hypothetical_protein
016bb8f63fca476650e8a209c98077e9	amidohydrolase
016efac8156bb9e0d74c7e476660aafb	Transglutaminase-like
016fa0c1df027b652b9a6b7e159980b6	Indole-3-glycerol-phosphate_synthase
017332e5ed91485e22c53c2a651f1014	putative_N-ethylmaleimide_reductase
0173cb96044289937f8c6e576f065d6b	Activator_of_Hsp90_ATPase_1_family_protein
01754c25971f6204f41d05615b90f5ac	protein_kinase
01755306dcf8a2a7b628052af9197cdf	Glyoxalase-bleomycin_resistance_protein-dioxygenase
01769659e35b4768793877d569bbfecf	hypothetical_protein
0177a76d4907d50f3a2b8560bfe47841	lytic_murein_transglycosylase
0179bd4df6be9da16f3240c52fe95283	hypothetical_protein
017a748e51f06c490e31156c2294c0f4	molybdopterin_oxidoreductase
017b31ec0ee10b9f507416225192c905	putative_serine_protease_do-like_precursor
017dd9be47e7caa00a711426ed32b9df	sugar_transporter
017ed31640f6cbcf29742b53d9dcf754	2-oxo-hepta-3-ene-17-dioate_hydratase
0180254f306236110732afd51bb41882	glyoxylate_carboligase
0180a1f1c0819188ae00edd8d8311756	fatty-acid-CoA_ligase_fadD16
0182471eea19d8f66a3c1b7241bd8174	amidophosphoribosyltransferase
0184636a66f631f3507e083b2fd623ee	pppGpp_synthetase_I_SpoT-RelA
01853fd3ba4111c5e1138f4eec897efb	NADP_transhydrogenase_alpha_subunit
018590c508196a0df4b2075e50bd0e43	transglycosylase-associated_protein
0186b6ca042c8bccb6d819f70e62abad	LysR_family_transcriptional_regulator
0188a45d39a47aa9e8e5c0ad38005cca	hypothetical_protein
01896ef9a02ad28e8df5911e36cfbd53	nitrite-sulfite_reductase_hemoprotein_beta-component_ferrodoxin-like
018a9274a8d17f1a012048b0e7bbfe1e	ABC_transporter-like_protein
018aa9987f66bcb2a05a61f97307057e	ATPase_P-type_transporting_HAD_superfamily_subfamily_IC
018b4c2472fdb9ac7db5afc7f8abdc8e	glyoxalase-bleomycin_resistance_protein-dioxygenase
018bf54d531fbacaed99bff3203f5513	hypothetical_protein
018d9c6c9d39564794f20d48cdf941fc	putative_two-component_system_sensor_kinase
018da4f9ea76527f92c69d3fa110b43f	chaperonin_GroEL
018e598dce926bf36d4e2a3090611761	two_component_transcriptional_regulator
019034280ea2a643e98676e5ae64b113	peptidase_M24
019173abf1639c51567bf7c9e54924c4	16S_rRNA_processing_protein_RimM
0191bb74f230ceecb47174fc4e2540f0	periplasmic_binding_protein
0193880104d610ea652cd0e52861ce55	acyl-CoA_synthase
0196234c2b3c4453ac98051fd5da0c63	sulfate_ABC_transporter_inner_membrane_subunit_CysW
0196eb50b27978ce0229e69e38a4ba87	Glutamate--ammonia_ligase
0197576ada434748ba6a7533c9a17964	RNA_polymerase_sigma_factor_SigE
0198b7392cbe0d57d2efc429a7ebf3c3	major_facilitator_superfamily_protein
0199ec4349dcdd6ab3f07123307da51f	precorrin-2_C20-methyltransferase
019aa708aeccd74fcb786c4d74f7fd27	ABC_transporter_integral_membrane_protein
019c2f8ab77bbbd49d9cd1f5008fccf7	glucose_sorbosone_dehydrogenase
01a10192925fde821b0167f4f3a756d8	ABC_transporter_related_protein
01a27123ee96dc5839dc1a1eefb7f1cc	inner-membrane_translocator
01a3d22049628e4c992548704c1f3476	integral_membrane_sensor_signal_transduction_histidine_kinase
01a40c24070e16ebbdcbadb91797dc00	preprotein_translocase_subunit_SecA
01a5991e9333c534fd404aaaf63e8b5c	methylmalonic_acid_semialdehyde_dehydrogenase
01a685babb6e97797ba18e1463c4e57b	adenylate_cyclase
01a6a16fa7f0b85be00c93a4bb82b408	GTP-binding_protein_TypA
01a6b333fa8cd7a921eb5e228d27a0fc	oxidoreductase
01a76c1f2450ec9c95abfb1c419cc788	elongation_factor_G
01a81c286841eb4492e99f63b5f776b2	hypothetical_protein
01a83cca06f6b4785b621614a1cda217	peptidase_M24
01a8a476118e53844e52820f5190d871	agmatinase
01aea8edee15443b020dab32683de87b	cysteinyl-tRNA_synthetase
01aec347122da590d5dacf104d3599c6	UvrD-REP_helicase
01af2f303d40a22ef8ab4e15c12ad984	alkaline_phosphatase
01b0e04035db8a8545d4f5661c78d012	hypothetical_protein
01b1a27d6a03097a4d033c363db31a50	thiosulfate-binding_protein
01b1ac7273bf833e682f5d251da9c680	monovalent_cation-proton_antiporter_MnhG-PhaG_subunit
01b28e8e414e45f4dab297d419464974	malate_synthase
01b482345c014e2f82015f4f5049f877	pyruvate_phosphate_dikinase
01b4f1076b3a354a927d906206de82c8	ECF_subfamily_RNA_polymerase_sigma-24_factor
01b542350673f4d70bc157cc3194077d	two-component_system_response_regulator
01b67c0b6f1769fa95c6e2bd91476267	alanyl-tRNA_synthetase
01b6aa681fc8a683550737f29aca1813	double-strand_break_repair_helicase_AddA
01b717e47adeec2609ae57ceab5325ad	transposase_for_IS2606
01b7bbdc6ca1232a7a4f0762b6617ffb	YidE-YbjL_duplication
01b87398b0829cd75ef828c40c3d5850	glycoside_hydrolase_family_2_sugar_binding
01b9b62867262f346cb0217eb3dcd214	iron_sulphur_protein
01b9ed785e98a4fce8eb5756c8c8cfa7	trypsin-like_serine_protease
01bddab92122b24e8a74963e40257aac	DNA_polymerase_III_subunits_gamma_and_tau
01be307782a231666c4623a687970a26	alkanesulfonate_monooxygenase
01c05bca0305879aea28b7c7f4727abb	DNA_polymerase_III_alpha_subunit
01c06d2168224e2159895136e61e8c38	excinuclease_ABC_A_subunit
01c2501dde141eec3f80e8317c8d7890	transcriptional_regulator_LysR_family
01c2f62595b70e65957959796b26a540	cobaltochelatase_CobN_subunit
01c3d747a19babbf1047906cac33fe76	short-chain_dehydrogenase-reductase_family_oxidoreductase
01c55a698450dc0c912af5fde68ec027	GTP-binding_protein_TypA
01c77a255711da87a778d124189d0cd5	hypothetical_protein
01c917609259d3ec840606fcdb5a30c6	DEAD-DEAH_box_helicase_domain_protein
01c9af94fbacc96bfc6f99a81de149d2	multimodular_transpeptidase-transglycosylase_PBP_1A
01cbd1ea3270b8bc1f6021ec0a54bb04	thiamine_biosynthesis_protein_ThiC
01cddde97e26ec731cc383c79384c440	amino_acid_permease-associated_region
01cef8f56369517680ba7590d642efb6	putative_efflux_protein
01cf2219dec12299753ea8d7602623ae	carbonic_anhydrase
01cfa4108df7aa8b31e9123c57672de3	gamma-glutamyltranspeptidase
01cff745ce3913decaea619ab52cb6c7	binding-protein-dependent_transport_systems_inner_membrane_component
01d157f70ef017a0dedacb58b16b714e	Phosphoglycerate_mutase
01d3168e152867d93bb258def81a074f	glucosamine--fructose-6-phosphate_aminotransferase
01d3e28c923815070b5db7807f2f659f	DNA-directed_RNA_polymerase_subunit_omega
01d3f8dffe04d35d4b7c092520d36031	hypothetical_protein
01d4888d79bd5e9013d92e51c403097a	hypothetical_protein
01d4ee7264a8978606868bc24023934f	amino_acid_ABC_transporter_ATP-binding_protein
01d6615ce6236a4dabb0817b8fc3c9b4	ABC_transporter_related_protein
01d994c3287adc89ad5167210b20b0e0	conserved_hypothetical_protein
01dc2a56fa9cf00d6b708c354a400a86	iduronate_sulfatase
01e1a9a12d72204b09feddab9db9ac56	malate_synthase_G
01e1ea722dedb657d2c53bf54f618959	Polysaccharide_deacetylase
01e2dd0aabcbc45e87d376c957ef7d5a	ATP-dependent_helicase_HrpA
01e2fc88122a41d07d1668b9ce31508a	hypothetical_protein
01e3642abdc12345e4f281b8600229d4	50S_ribosomal_protein_L24
01e371f0b0155245a2f2cc7978a7d5c4	bacteriocin_family_protein
01e463608d197a81310048618bf61feb	Prephenate_dehydratase
01e5a7f297f3a10ad45300633f067441	hypothetical_protein
01e5b2380ba90ff683871382b41dc3be	hypothetical_protein
01e70b9c7e44c8c3e4f360167fdf3c44	cell_division_protein
01e7242bad371627ae126acd9b5100d7	sulfatase
01e7fdc44f8069eb716102e375f6cd4a	methionine_sulfoxide_reductase_A
01e973772a6c97d31b6e016107f948e1	mycothiol_glycosyltransferase_msha
01ea48cb86d269adf2008dc604101735	50S_ribosomal_protein_L5
01eb5f295bbf648d21935525c9c09cb6	Aldehyde_dehydrogenase_mitochondrial_precursor
01ec28d6fa5ab401c7e5677234e1a4bc	dipeptidyl-peptidase_4
01ef7a31838703e97a9780210e1ff778	protocatechuate_45-dioxygenase_beta_subunit
01f2cd7d7b0b792cdc1a1e9ce161a61c	glucose-1-phosphate_thymidyltransferase
01f2edb8b142bd63577f5bac62d8ac86	lipid_A_biosynthesis_lauroyl_acyltransferase
01f2f8103e601ce9296bf73ec78c127a	small_subunit_ribosomal_protein_S2
01f41ccd370c82018484805b2ecb91a2	Ribulose-bisphosphate_carboxylase
01f5b35a7d38289e45d500dad9b84807	putative_carboxylase_like_RuBisCO_small_subunit
01f5c3e9392c0b117d46bb131ce77dc2	DNA-directed_RNA_polymerase_subunit_beta
01f7103d9b54aa9e3921a68d7d203381	Pyridoxal-5-phosphate-dependent_protein_beta_subunit
01f86a5524454c6723baf2114b60591d	chaperone_protein_DnaK
01f9c555180fba31f58d873862c10751	transcription_factor_WhiB
01f9d519598b1c9628fe2f4f1ef6c9b5	glutamate_synthase_small_subunit
01f9f178955e7905d2562746a580a6dc	3-methyl-2-oxobutanoate_hydroxymethyltransferase
01fc70b6d5ad3427956eb0c424d47564	glycoside_hydrolase_family_18
01fdc9b5c391a3778a25f8070d3fa673	hydroxymethylglutaryl-CoA_lyase
01ff51291f0a2ff9f9cc839d89be2514	NADP_oxidoreductase_coenzyme_F420-dependent_protein
0200bf744421970da1db446a996728bd	hypothetical_protein
02059edbc3abb9d8168ee2afe3ac9bb1	extracellular_solute-binding_protein
02070893d85a82c56ad4091574b51fd7	histidine_kinase
02073cc3c117be9fec0dd605b1831ebc	hypothetical_protein
0208dba91bad94db4fc6eab30dd5e9f7	tryptophan_23-dioxygenase
020adb83f69c9f73c2714419fe305675	virulence_factor_MVIN_family_protein
020dcd2ee31c26dba30853789d2f320d	glycyl-tRNA_synthetase_subunit_beta
020e6ac10d581b44b226312d60c6b8cc	Cytochrome_b-b6_domain_protein
020e6d1eff854956a168cf581726d6e8	WGR_domain_protein
021288d1def9eba4544ab193842062b1	alpha-beta_hydrolase_fold
02146e5d3d8b038249437666eee68b0b	monooxygenase
0214d1d9c4c6202531185218ca1f060f	Rieske_2Fe-2S_domain-containing_protein
0215028803d52bf502a5a81745f0a961	ammonium_transporter
0216687ab56807b4154c891fca9f501d	NAD-dependent_epimerase-dehydratase
02193a74f9eedb1f20e7aa4b7a50495c	isochorismate_synthase
0219b67082f488eceeade5d71f043468	TM1410_hypothetical-related_protein
021a1efd67bf6fa6ad6f095626f9b045	glutaminase_A
021a52c9d039c52c40fcda4f6a4e86d5	major_intrinsic_protein
021aec430508e53d48d7a5e1b385fd6f	DNA_topoisomerase_I
021c1b4a7fd2924a59543d39930d962a	isopropylmalate_isomerase_large_subunit
021c6da9be1e2ab0f8130aea31c87a2d	alkylhydroperoxidase_AhpD
021d7d1eee746a11a3554bb4644b7495	arabinase
021fedc36cfb9afb70da258a832ba5a8	alpha-beta_hydrolase_fold_protein
0220b39bb3748cca0cbae6347c104759	HpcH-HpaI_aldolase
0222820ca702ffa6dc35608cadccfd95	hydroxylating_alpha_subunit_of_a_dioxygenase_system
02251bf95534cc20c6f049c61632d251	hypothetical_protein
02262a56db5e550e081581b097cf9747	putative_Histidine_protein_kinase_of_the_HWE_family
0226f9dff9846eb8e7cd0d110e9079f3	oxppcycle_protein
02277073579c2073626a3b43233d3a7c	glycogen_operon_protein_GlgX_alpha_amylase
0227c7046ccf6e14b1919cbe6262129e	glycoside_hydrolase_family_3_domain_protein
022944de03466ca67576b6b6788eab6f	polyribonucleotide_nucleotidyltransferase
0229d1c638871adae6aae1b105ec3be4	hypothetical_protein
022a8b121f8ea7a4feb02042b254d198	glyoxalase-bleomycin_resistance_protein-dioxygenase
022d1afe2acbe579453cf7c7a69227ad	oxidoreductase
022dbcf5e08dc9464d37ede6d941f0e7	putative_integral_membrane_protein
022de67179afeb14380df2a21350a7ed	signal_recognition_particle_protein
022e04aed6f7cc0a53e942cea3a2e34d	aminotransferase_class_I_and_II
022ebcc8c2334bdf743d59cd56052835	putative_ABC_transporter_ATP-binding_protein
022f3b8a4b949c3b2f8e1ccd25b965a1	alpha-glucan_phosphorylase
02317c2f1b486829553b84d587c9f396	Trans-hexaprenyltranstransferase
02326865f4b95d86aff3beebc65d45ae	hypothetical_protein
02327c291783dae132a63ee566058e50	sulfate-thiosulfate_ABC_transporter_permease_protein_CysW
0235abe4223c0e365c505c1327fab62d	heavy_metal_efflux_pump_CzcA_family
023727fae3e3ff7c08ff194f667d26a0	DNA_repair_protein_RadA
0237c57c366b5fbaf26a0d3279daf6d5	ABC_transporter_ATP-binding-permease_protein
0238dad03aa2716e5497cc4cdd12bfd8	ATPase_component_of_ABC-type_multidrug_transport_system
0239019457ac3061b9e3ca40ad2ceaea	transcription_termination_factor_Rho
023b9c7d20e92e1c1f157f66d8cf907d	conserved_hypothetical_protein
023c27888c73a436d0a50f97db8c9498	hypothetical_protein
023c61b62c682818f6f43212c8845abc	forkhead-associated_protein
023c9a4312e6680e92b21d23b0015fe1	diaminopropionate_ammonia-lyase
023d4ddbe4d79f3063d069fa1673ae0c	catalase_KatA
023e93bb0cb3fe47c2efdba6d5b4876c	pirin-related_protein
0241dc746c60176f905684d7e93e5c93	3-isopropylmalate_dehydrogenase
0242b72fc89c79148646f403e61a957c	APHP_domain_protein
0243ce1b0417c415f6d7c437bd680d27	peptidase_S15
024416ebd0e502ad3245685f09c92612	hydrolase
02459fc065f3f28313179f790e4a91e2	ArgK_protein
02462317b821b1b559381b96491a227a	DNA_topoisomerase
0246e0dbfcfdf36ae54fb03a10331838	SGNH_hydrolase
0248427ad7f5a901529e32339fea8c9f	fused_aldehyde_dehydrogenase-enoyl-CoA_hydratase
0248786c9beaab5258faa502fa770f9a	alpha-beta_hydrolase_fold
024ee4474c5508620653edf2bd7a8d11	leucyl-tRNA_synthetase
02520da3746b58169884fb6af670a445	aldehyde_oxidase_and_xanthine_dehydrogenase_family_protein
025265a372b91eda78b47b16f0491192	Bacterial_extracellular_solute-binding_protein_putative
02566bda7bc11f129affa60ec385034a	TRAP_dicarboxylate_transporter-_DctM_subunit
025706af8a6d9794ad01f4edd9baf103	F0F1_ATP_synthase_subunit_beta
02599cdbcd54bc8e88d2725c2b7507ac	urea-short-chain_binding_protein_of_ABC_transporter
025b8eb7577b71bd1ecaa773040471f7	DNA_repair_protein_RecN
025be52019559fc285bb7969a2cb13f7	Catalase
025cff45a367ac39edbade696da6620f	lipase
025f63ee81b7ee55d55464063655bfe0	methyltransferase_type_11
026004399cbd24c44227adc19669bae6	DNA-directed_RNA_polymerase_subunit_beta
02601f26175da575e00b7b5714087ee3	PAS-PAC_sensor_hybrid_histidine_kinase
026190473ad23703bd7f0534302de650	Ser-Thr_protein_phosphatase_family_protein
02645fd85b26c940c538a5b53e56c1d0	hypothetical_protein
0266628b61edc09363ba34d26d1c1d48	Fe-S-cluster_redox_protein
0268dbec4e091d4c37dcb80d4eea6f1d	transcriptional_regulator_XRE_family
026a395d7f7e58bf226220019d8ab7d3	putative_cytochrome_c_oxidase_subunit_I
026aaca6fd8fe184d66345e7ac2a7344	peptide_chain_release_factor_1
026b678f5896dc75f638acc88264ae89	putative_methyltransferase
026c10014f7df022b13d3a2cbcb97432	DMSO_reductase_anchor_subunit_DmsC
026d597ecc5339de745cc4f1c357f712	protein_kinase
026da3e82a9d9f225017e2bd91409ddc	hypothetical_protein
026e70da86bf822f270051523b106008	chaperone_clpB
0271757963d72615d5c2e7bf2f24f7b9	glycosyltransferase_36
0271fb9290250d84ea6d0a9954bd2d0d	6-phosphofructokinase
0273b6672184fa807da6d18a86f95ceb	methylcrotonoyl-CoA_carboxylase
0273fd28cd42d2d8d5d79863f7593cfb	inner-membrane_translocator
02744a07a4674890ee6cd7e1c600ae17	P-loop_ATPase_protein
027551069d41e50f05b9abd563dae7c5	amino_acid_permease-associated_region
0275ee4ab2e0b5fe26a256b764b78d60	CheB_methylesterase
0276c36a5d6384fc99a597e1688edc5a	ABC_transporter_peptide-binding_protein
02796c200cab3d67419a357473ff29ec	excinuclease_ABC_B_subunit
027ab27dd060f8cf1b968e0d5be3d72c	PHB_depolymerase
027b3c8cb5953b490c21b251bf6aad2b	type_IV_pilus_assembly_protein_PilM
027c46ac5da5adddcb9f969118775630	metallo-beta-lactamase_domain_protein
027d72b48a648726119c1d75a0977c70	carbon-monoxide_dehydrogenase_acceptor
027dcd5cea0bb905f29ced0f45772874	ATP-dependent_protease_La
027eaad8a0c1bcddea1034f930705898	hypothetical_protein
02802d4f39b286d34cc66fe9b8594f7d	phosphopentomutase
02835345cb7375fa5a951e2be24fd5ce	large_subunit_ribosomal_protein_L14
02840a04e379b4e9efaa20aabd93f700	hypothetical_protein
02862436662ce2b0617d476908f0d77a	Alpha-2-macroglobulin-like_protein
02867f1bfb70a5e33e390fbf5b3f71d8	phosphoribosylaminoimidazole-succinocarboxamide_synthase
0287c863de7da25ab758becee5889fc3	2-succinyl-5-enolpyruvyl-6-hydroxy-3-_cyclohexene-1-carboxylate_synthase
0287cc630b7ea9f593b94169c92bd26d	transferase
028811e84a80ac95489e296536f04ed1	glutamate--ammonia-ligase_adenylyltransferase
028930185d3cbffe988741e9b5350207	SSU_ribosomal_protein_s14p
0289b2241df3a4491b26cdee216bdbfe	Phosphoketolase
028d014a87201ee4378ad58aa36da355	group_1_glycosyl_transferase
028da4139b3a3db01aa9574f9fb0a672	Electron-transferring-flavoprotein_dehydrogenase
028e5847838197c1cec81154172765e2	hypothetical_protein
028e7677a16eb1f450ed8971ff8d192d	hypothetical_protein
028f71750f3ef5fbf9b2a1cc1f925e7c	molecular_chaperone_DnaK
0292eb4278100d30bb31a64138fbc8ea	excinuclease_ABC_A_subunit
02941964b1dc7c21c174acd5e5815523	DNA_gyrase_B_subunit_putative
0294474b50ff75b5e056d80f829de887	binding-protein-dependent_transporter_inner_membrane_component
0294c7369faafd38a84696ff5cb55612	alcohol_dehydrogenase
0296276a26867f32ed51483eca8c81bc	putative_transposase
02999dea13dfe8f8d2395f106d737d75	DNA_topoisomerase_I
029e20d463d5f778b5bd2c2c1d2a94f9	putative_signal_transduction_histidine_kinase
02a01f4abe8a73f41895a2054d91ff4f	glutamate_synthase_subunit_beta
02a1a15587a43530fe5790a693cdbc3b	lysine_23-aminomutase_YodO_family_protein
02a2a12e0009684dbbe59d42142b845d	lysyl-tRNA_synthetase
02a34ee1762c6425355f046b072a1305	UDP-N-acetylenolpyruvoylglucosamine_reductase
02a47c78df2592f2ba32e53c778693ef	degV_family_protein
02a66d431a338cc8756dd91b8aee8140	50S_ribosomal_protein_L3
02a83ecfc8b8c2257e322a7b41c5551f	PpiC-type_peptidyl-prolyl_cis-trans_isomerase
02acdfd4cb6e4ad143f560ad3d9ba030	aspartate-semialdehyde_dehydrogenase
02ae2961eea9b259c390325480cd09d3	putative_cytochrome_oxidase_assembly_protein
02aeefda5be8e421036c0ea8ef9a849e	14-alpha-glucan_branching_enzyme_Glycogen_branching_enzyme
02af459b787eb14c511ab592f0da9a8f	alcohol_dehydrogenase
02afbcc52c71287b9cd191dd62c55edb	extracellular_solute-binding_protein
02b1a72ffa3135ebc68fff18426e9031	2-isopropylmalate_synthase
02b1e4f5c8ad5e93a94ec83e696ea641	sulfoacetaldehyde_acetyltransferase
02b26f825845d144b7175af97199446f	L-lactate_dehydrogenase
02b2daba113903d3e3cdb259884dac4f	acriflavin_resistance_protein
02b4197ff7dbc26909df68da0b39fb14	NADH_dehydrogenase_subunit_E
02b5f31f6242a8223a12256eb4dc8a41	acyl-CoA_dehydrogenase
02b61f60f8744a03ae94529d7bd7c7e4	DNA-directed_RNA_polymerase_alpha_subunit
02b8c85269a08328643e15f7979e0341	cardiolipin_synthase_protein
02b9a5fc2128ca92eded06eb90122ab1	anthranilate_synthase_component_I
02bc8ea5cf895bb2fc6a5d29150ef44b	hypothetical_protein
02bd412797eacc4dddbaaa9fb7d22242	signal_transduction_protein_containing_EAL_PAS_and_GGDEF_domain
02bd9923f3ad6bf1e384ddd6d8a215b2	hypothetical_protein
02be26dbcbb6d95b9205d944cc783de0	3-hydroxyacyl-CoA_dehydrogenase_NAD-binding
02be670e483821a7e8544d1b8b53bc56	Serine-type_D-Ala-D-Ala_carboxypeptidase
02beb4d6af196b293ff9edbb4e5b6d48	conserved_hypothetical_protein
02c10818c88795a030e59f6a3c5b7fb2	glutamine_synthetase
02c24146bfad884406f16de5aa256131	aminotransferase
02c253ae383e97a3180b046723efae9c	NADH_dehydrogenase_quinone
02c27f81cc0f1ab112e6e55dbe5f3c2e	hypothetical_protein
02c379881381ec849d465048b4677876	peptide_chain_release_factor_1
02c541b648ce8a02b2d4ab847fc5a665	histidine_kinase
02c6883ea97635c14c974ac835c445ea	putative_phage_associated_protein
02c6f72b696874b8e5c72f36203da69c	putative_DNA-binding_protein
02c70e4f5263a9802dea73414d45ad05	polysaccharide_deacetylase
02c8c4fb5d363d18551bad1f5538c57e	DNA_gyrase_A_subunit
02c93e414408ee0e229ec844ab7d7b6d	non-specific_serine-threonine_protein_kinase
02ce9a248fac9a1d86920e317706e271	oxidoreductase_domain-containing_protein
02cf6a83f34e9a66f7d6aa17aa979a32	beta-carbonic_anhydrase
02d1b3936909fae6504ffe63285daff8	Na-solute_symporter
02d8a4d0bdf5e7ab24c0ab049c9c655f	hypothetical_protein
02d929d8195400b8798f0d7005c2099b	putative_periplasmic_protein_precursor
02db28dafff473b667cf1fd95f5ab79e	major_facilitator_transporter
02dc3982a1db4f3a126e16f31f9b8825	fmnh2-utilizing_oxygenase
02e116af867f1d32113044612bf21e49	major_facilitator_superfamily_MFS_1
02e5448b4709ce4836ef508da7de02aa	ribokinase-like_domain-containing_protein
02e54aafc1e2265a584d1bc5aab5516b	glyceraldehyde_3-phosphate_dehydrogenase
02e7f21c3b3e29a13b91543fca041285	Galactarate_dehydratase
02e9f7296e884d3c6400adabd896bdcb	isocitrate_lyase
02ea0b2c1ff9b942ddaefbe2f02529b1	chromosome_condensation_protein
02ea266a95bd6ff0f0484dc87f05d511	sulfite_reductase_subunit_beta
02ea8aee5ebd9ea15b4dfc8a9cf19328	pyridoxal_phosphate_biosynthetic_protein_PdxA
02eb89ebe7787d061237168e53fd4ca0	amidohydrolase
02ec53978341faf4256870f8b5808c9f	putative_transposase
02ec72488b924299bb68132e20646f25	oligopeptide_ABC_transporter_ATP-binding_protein
02ecd92139fed1f041190f7bd0a63e37	glutathione_import_ATP-binding_protein_GsiA
02ef3cd1a7dfa5379f1b7cdf884d648d	hypothetical_protein
02eff1174dcee32eff15bbdd96d9619e	DNA_gyrase_subunit_B
02f11648a8bded77ed868bb27dee0414	protein_of_unknown_function_DUF112_transmembrane
02f263c1f971da3e5ea5f736e7a8ccc6	hypothetical_protein
02f63ed0f41572449c692e4943518e97	3-isopropylmalate_dehydrogenase
02f6e93b959ac410291f65d9b8ccb406	DNA-directed_RNA_polymerase_subunit_beta
02f6f1fe61837e9088318d8910484806	protein_kinase
02f80dc699b686e08eaf04f294ae1570	alpha_amylase
02f873e5cd386303982d385e13bcdfab	acyl-CoA_dehydrogenase_domain_protein
02f97b50421bb3d1af311da1bcd0935c	Undecaprenyldiphospho-muramoylpentapeptidebeta-N_-acetylglucosaminyltransferase
02fa2d69a1e46d4aec1e23ad0e4584c4	putative_cytosine_deaminase
02fa6e4dc08878acd025d5f16fa72021	condensin_subunit_scpa
02fcaeb3e05f36cd46f0d59c2991005c	hypothetical_protein
02fda7d1b9c88dcc0e4435cb2889a15b	acetyl-CoA_carboxylase_carboxyl_transferase_alpha_subunit
02ff358c3a3ddd4aee4d587e0ce9891e	hypothetical_protein
02ff842a21da89dedbceacad976e74b3	D-3-phosphoglycerate_dehydrogenase
0300359fea0b34a442c317db9d42b0e4	ATPase_involved_in_chromosome_partitioning
03008142fb207909fb8aaf097137394b	SpoIIIJ-associated_RNA-binding_protein
0300d6dbba634f37b5b0eedb86e35629	methenyltetrahydrofolate_cyclohydrolase
030207d919aa6061469ff57ed72063ba	transketolase
0305b5003451f1109a8fe3d4bc72b3ed	branched-chain_amino_acid_aminotransferase
03063f95f6150bee86b34351b28794f3	conserved_hypothetical_protein
0306e6664b238bf7a95dd6c9f63eb16a	ArsR_family_transcriptional_regulator
0307c65b5f4f82e365e53590b0183d7a	peptidase_S9_prolyl_oligopeptidase
03082fa10cb3608283a7d3a471b10c38	aldolase_II_superfamily_protein
03088a64242e3741c6c86de86785f83f	pyridoxamine_5-phosphate_oxidase
0309662c67d6dc3c05835ecf2c5e9daf	citrate_Si-synthase
0309a732217989cedb939072a302edd9	integral_membrane_protein_MviN
030a7f738a318530350ffb00c1bc2fec	molecular_chaperone_DnaK
030b71cebd61f7fa22435b36cba05ba6	hypothetical_protein
030baca3f0bc6f8368de2ea3c07e57cb	TPR_repeat-containing_protein
030d4104aec72d30699147953bcf206b	hypothetical_protein
030f61b7bee29d8b3b51c6287954e814	luciferase_family_protein
030f9d83ca85d6dafc00db4adafc3d4f	hypothetical_protein
030ffdb34225c9acbd99eceaf09eaf8d	binding-protein-dependent_transport_systems_inner_membrane_component
031046450b731f8d4091e7d168b3cafb	Serine-threonine_protein_kinase
03110c12183148ab5f83a4b267d71063	probable_cation_efflux_system_protein
03110f4bbdb8e69c5b8e01a762d206fa	RNA_methyltransferase_TrmH_group_3
0311d0004a3b8409ff4b91e31a7c9f69	chaperonin_GroEL_Hsp60_Cpn10
0313b1b83470236e2d0268a0ac1379b9	oxidoreductase_Gfo-Idh-MocA_family-transferase_hexapeptide_repeat_protein
0313cf7f3c4ec40043692b723a4ec07f	ABC_transporter_ATP-binding_protein
03148c33a1a7b40454c6e8a1477d351c	type_II_secretion_system_protein_E
03158ecbdb66fc03335e38ff4645cc8c	pyruvate_kinase
0316a80f7def228c257fe63a07c7c889	substrate-binding_region_and_inner_membrane_component_of_ABC-type_glycine_betaine_transport_system
031abb2c3ccddd0a2a9925dfbd9692af	flavin-containing_monooxygenase_FMO
031b85605f9ec7a88d6a7ea25e16f1d9	primary_replicative_DNA_helicase
031c5a7335f641c992f2ed9e000c2458	hypothetical_protein
031d4e04d6789c4c0b9d4ab38bed3d21	Aldehyde_Dehydrogenase
031e68b1df0c18f9c68bda567ca9ba13	HTH-type_transcriptional_regulator
031edf102f81669fc253b707ae9eb923	phosphoribosylformylglycinamidine_synthase
031ef3edc8289c56cb898b6d54ce96be	hypothetical_protein
032090abc5260c1ae357c2c651b98162	agmatinase
03214647e3d38852cfa6cb66533c1782	glyceraldehyde-3-phosphate_dehydrogenase
0323f5f729ea75f8ac5509d8b11e000e	hypothetical_protein
0325b4009ebbe58626c817776cb17b07	Lysine-ornithine_N-monooxygenase
03262b3436f4233d4e314c0c771eaa3a	InsL
032645e9d38c7e93ce9e5e269b31cbfe	pyruvate_flavodoxin-ferredoxin_oxidoreductase_domain_protein
0326dd5d2dfc7f986917d6882a1af263	birA_biotin-acetyl-CoA-carboxylase_ligase
0327a20c65a0dc05fa99f5f31190b32d	permease_of_the_major_facilitator_superfamily
0327a416e62a70fcfd7a38254df961da	caib-baif_family_protein
032852ce3ff9d88ce5fc6f1ff1378f17	RND_superfamily_exporter
032a040a3c09f1f5bbf1c9d8e96211b1	acyl-CoA_reductase
032a8de64cb283a92a4589c379c5798a	ribonuclease_BN
032d60e33f23581e7be2931173670b99	pyruvate_dehydrogenase_subunit_beta
032eb7550c82739927a5afdf8bb92b38	hypothetical_protein
032f29bc31d302f06c2e1b9be62ddc91	acyltransferase_family_protein
0330af16a9bebf2dffcb426861eaadf1	conjugative_relaxase_domain-containing_protein
0331e92c0362a753aa4fe9dadd004260	protein_of_unknown_function_DUF214
0333dd38750577b49e44aaccf17e73fc	hypothetical_protein
0333de7af43d28a74d83e14373fe0485	beta-lactamase_domain-containing_protein
0335898a2951317a17786b49e621249d	ribosome_small_subunit-dependent_GTPase_A
0336ee2868c36ff535932f5097772225	putative_lipoprotein
0336f9f164febd6f903e1737592f09d2	30S_ribosomal_protein_S1
0338287d3183d04e089b2c2a16f0072d	ATPase_associated_with_various_cellular_activities_AAA_5
033869a000c1b939a29919e087955757	SirA_family_protein
033a168bf7f9d6d428a32c52d64a6e6e	GCN5-related_N-acetyltransferase
033cb1233339ff5df6121377ffdd89a4	DegT-DnrJ-EryC1-StrS_aminotransferase
03407eef7fd7d72ff1587faeaf7a6f7a	ChrB_protein
034529ae5b920ce7c6d1a1542284fa98	hypothetical_protein
034595d2f30e7305197ced211df38d11	acriflavin_resistance_protein
03464a7442db1d4cd0bea547f8f6b623	putative_DNA-binding_protein
0347129f0f17bfb22b1886d2ce95994e	hypothetical_protein
0348e5ef5a5fd584db9dec33dc3b867d	ArcD2_arginine-ornithine_antiporter
034bfeeac0f510fbda03c505345d48f1	aldo-keto_reductase
034ebeb021299faa488c8666edd544eb	aminotransferase_class_I_and_II
034f1d62c29663bcbc90b8c7533d200e	FMNH2-utilizing_oxygenase
034f83053d525f963cf434b715e332d2	putative_secreted_protein
034fc758fcb3f77d5de525afa19b1fc5	putative_alcohol_dehydrogenase_cytochrome_c_subunit_precursor_protein
0350b3e022b6b3051ca86afe5afd2ee4	putative_dicarboxylate_carrier_protein
03534efb4528b48f60bee7ba9a34934b	glutathione_reductase
03548318439c350c805545514a7b468f	Rieske_2Fe-2S_domain_protein
0354bb69cd56d39319e3fac4a063f110	deoxyguanosinetriphosphate_triphosphohydrolase
0356c45c2c2acea4420293457db8e486	3-oxoacyl-acyl_carrier_protein_reductase
03571bf89ef259d2b6665774660995e6	pyrroloquinoline_quinone_biosynthesis_protein_PqqE
0357c0b86d638a24d9ba4ee2f1a73108	TetR_family_transcriptional_regulator
035c7697335eb8d98b22d6717bde6530	ATP-dependent_DNA_helicase_RecG
035d9cb85517dbe4393b33d50cb3a623	alcohol_dehydrogenase
036098af664afd2957d5b5b98af65e33	hypoxanthine_phosphoribosyltransferase
03617cf39377eefd0737f4790f68f3fc	hypothetical_protein
0362b1d479575b5f24f349d631235424	phenylalanyl-tRNA_synthetase_subunit_beta
03642b14d2d7f7641dfa1874ae479299	aminotransferase_class_I_and_II
0364620adecb671b7115c393e31d0328	ethanolamine_ammonia-lyase_small_subunit
0364d6fe1ee84e43927bb2e5774ae6ac	sugar_ABC_transporter_ATP-binding_protein
0365f9dbc0d6683f1ed84a76b55e4d18	hypothetical_protein
0366a7b2b64c7f0a5a3a6022002ddb14	ABC_transporter_ATP-binding_protein
036b047137975eefeb9c51caf3dd73fb	succinyl-CoA_synthetase_beta_subunit
036ba85b91233704b9dbda3479a49621	peptidoglycan-binding_domain_1_protein
036bb7787328bbb0452718b172dd8e39	putative_carbon-nitrogen_hydrolase
036ca0982d2f22d39104130a61c629d8	hypothetical_protein
036ef75775702cec1480a4b2176c84c3	phosphoribosylformylglycinamidine_synthase_I
036f37d8cb17a8b522e572ec85a40063	lyase_precursor
0370a777574d5452226969f3d0ac882c	3-hydroxybutyryl-CoA_dehydrogenase
03714efd51e56b11194879f9a69e5464	ABC_transporter_ATP-binding_protein
0373a805770a6411aa76105ed74f600a	hypothetical_protein
0374c22745c3b367cdfaa94e240dcd3d	molybdate_ABC_transporter_inner_membrane_subunit
03782eaea52f96ff0f8e9399814176d1	protein_of_unknown_function_DUF374
037861c5a5d1b8ae4b0ae336671d4324	3-deoxy-D-manno-octulosonate_cytidylyltransferase
03787fdea21288ccff68ff38cf81d64f	putative_AsnC_family_transcriptional_regulator
0378b0f670ce5eb332cc1d55ddcf4d63	formate_dehydrogenase_alpha_subunit
037c2a1a327aec7791d28dc3c1223b0f	lipid_A_biosynthesis_lauroyl_acyltransferase
037e9745ff69c1b779e38c84e319520d	glycoside_hydrolase_family_protein
037ff778538a5ff018d7d5851781f3bc	putative_aminobenzoyl-glutamate_transporter
03836b1708cc91da3e6507c917c7d154	peptide_ABC_transporter_ATP-binding_protein
0386e753d5a162829808d5f94549e55e	3-oxoadipyl-CoA_thiolase
03881a9ab082c9851ef963f976cede8e	cystathionine_beta-synthase
0389762b84d627518026404d8edc2455	succinoglycan_biosynthesis_protein
0389f52182b57ae27e0f5091d0deff1a	MMPL_domain-containing_protein
038b5363a4d1cff692fcd8b807ab6bc2	cell_wall_hydrolase-autolysin
038b5c99380cbcb437a152025a52b61b	branched-chain_amino_acid_aminotransferase
038d633783d1302a8fc16423b13d2b51	argininosuccinate_lyase
038d9f7de3fdd8c0dfea5c10f66d7072	transcriptional_regulator_AraC_family
038ddf297cd4edc674c6a4b3698693e8	putative_dehydrogenase_protein
038e227fe58f1eed03020de9b4ab1f28	cytidine_deaminase
038f6972e599b72ee1f5484921273eed	short-chain_dehydrogenase-reductase_SDR
038fe298eb113a01c7fa40c44cadf6f5	excinuclease_ABC_subunit_A
03924e8a2c3ee3b3185cbdcd54819bc4	putative_sarcosine_oxidase_subunit_alpha
039375d5a4900e31e474ae0179e2a90e	putative_ABC-type_branched-chain_amino_acid_transport_system_periplasmic_component
03947670a90738075410c3aef7426a94	hypothetical_protein
0399de81ffa78aec23b3b27a60c0eaf8	Ppx-GppA_phosphatase
0399fb9120acd28cba647d02f464d83a	ATPase
039b0d2db52881be9032f5e08825a2ff	aspartyl-tRNA_synthetase
039d9f825e373f593a0aa930940b775b	hypothetical_protein
039dbfde1274c38b2022b73ef22c67b4	type_II_secretion_system_protein
039e6a133eb95eace3046be2b0a45db8	4-oxalocrotonate_tautomerase
039f50ecea7f726b92f54f918d290439	glutamate_ABC_transporter_ATP-binding_protein_GluA
03a06341936a0615175bba42b7aa5b1a	GMC_type_oxidoreductase
03a2604b15d28e2855aaa1219b86d448	amidohydrolase
03a530220be48d36aed0d57f626795e3	acriflavin_resistance_protein
03a715b21350e7805175c61392c4c857	ATP-dependent_Clp_protease_ATP-binding_subunit_ClpX
03a83dabcbf64c13dc5ca709c835e950	UDP-N-acetylglucosamine_1-carboxyvinyltransferase
03a901a3888b0162266c45b5a7df2bb4	hypothetical_protein
03a98c435a210c28ad213b27c6566e31	aldehyde_dehydrogenase
03ac4471dfdcb415c80720c6bcbf0e60	putative_FAD-binding_dehydrogenase
03b0f8cc2ca4bb0826fc796ef6022941	glycogen_synthase
03b13ca116e0aac2dc80710075fcc428	sulfite_reductase_ferredoxin
03b1f3713c393ca7fc57651d1c6d00ba	regulator_of_chromosome_condensation_RCC1
03b1f80a97651b0c08c5eccd970c1c74	dihydroorotase_multifunctional_complex_type
03b3ac9e6bca6d51e68ee5b917dacfd6	oxidoreductase
03b3e6c81c2f765eb9903bcada2f6e49	ribosomal_large_subunit_pseudouridine_synthase_D
03b5c46d82aae8319a9ade886dee7e3c	acetyl-CoA_acetyltransferase
03b60f12fd0c9697c8cb612c558cf6ab	putative_methyltransferase
03b6154dbed8621e10f48e4bf5f33094	ABC_transporter_ATP-binding_protein
03b6dc67e6834cf2289b1295846b4c4f	glycoside_hydrolase_family_2_sugar_binding_protein
03bb7898454e5af020e4fc410b62df43	putative_bifunctional_trehalose-6-phosphate_synthase-HAD_hydrolase_subfamily_IIB
03be2c68ac23301a7dfa1cbddd61dac2	acylamide_amidohydrolase
03be5bb2e8b7de7925f162854a21e371	hypothetical_protein
03bec0b8a513e545f69b4f02bb2e4397	secretion_protein_HlyD
03bfc4e713402386e11403eb62dadae0	aminotransferase_class-III
03c02f2f9701ccf800dfe77c28f87900	hypothetical_protein
03c283eb01b91de3eca80c7d2f0f68cc	putative_sulfite_reductase
03c3f62a54d69e0d3b8ec59652fc00ba	glucose-1-phosphate_adenylyltransferase
03c5155bc6d21823584bdf65782c5c68	hypothetical_protein
03c78e212fc25d1406104afe000e9c3c	ribonuclease_III
03c9042ea51fa3637ffd1216baeb4fb0	excision_endonuclease_subunit_UvrA
03caaf376dba9fd071cee0a1ca71ece4	LuxR_family_two_component_transcriptional_regulator
03cb8d03091651ea7f9563399511d047	succinate_dehydrogenase_flavoprotein_subunit
03cc91e8cdcfe479a90917f0f36703e3	non-ribosomal_peptide_synthetase-like_protein
03ce0182e07d0559da57a458d0500090	alkyl_hydroperoxide_reductase_subunit_C
03cedbf4093823d36ea803055e305093	dihydrolipoamide_dehydrogenase
03cf2e0bdd72f234b476ad62b3c855dc	hypothetical_protein
03d152a2cc83d5ff835d1482acec48ff	putative_carbon_monoxide_dehydrogenase_small_chain
03d46bb97d11b99b646ce3884f91bedc	hypothetical_protein
03d504ec29252f9d52db0b9004151271	haloacetate_dehalogenase
03d689c677b17b34078ce829ee31f100	glutathione-disulfide_reductase
03d78613a6256340786292daca4729b6	ErfK-YbiS-YcfS-YnhG_family_protein
03d85bbc5a9bac89d4c4f84bc1d7a6bb	7-cyano-7-deazaguanine_reductase
03d9185db82529f5075c738e742a087d	Peptidoglycan_glycosyltransferase
03d9f538a900c430d9238b17a3bd9a37	replicative_DNA_helicase_dnaB
03da802abca5b373d26bf1b0ef1b014b	hypothetical_protein
03da985201dc62aa191a55fa813f95cd	NAD-dependent_epimerase-dehydratase
03dbac1e34ab691488dfe43fd8e8f8f6	methionine-S-sulfoxide_reductase
03dd6040a66a2562a159e7aae72fd567	hypothetical_protein
03df429914d6b095dcc47ba3175053db	cysteine_synthase
03e03ae5d83623fe05cb1d76bff092be	hypothetical_protein
03e4cc2a73a483f587da9ca22ec7b481	enoyl-CoA_hydratase-carnithine_racemase
03e5676295ad4013197efa6f075fb577	N-acyl-D-amino-acid_deacylase
03e6df439010e3117b722a30632b2cf7	propionyl-CoA_carboxylase
03e720af70597fdf870ce051997a71aa	beta-lactamase_domain-containing_protein
03e8ff9b7969bca348be7de31157905d	Amidohydrolase_3
03e916b333ee5eb0483221a0ad674ba4	response_regulator_receiver_protein
03eb97e07e12b9cfe1905efb5faed08e	hypothetical_protein
03ebbc968d43fe8bfcd45b67f2557608	polyprenyl_synthetase
03ec95e5ba8565a46d8708a1c287c603	succinate_dehydrogenase_flavoprotein_subunit
03ed21acbcd6a011fe23ab81a362db1c	outer_membrane_protein_assembly_complex_YaeT_protein
03ee6d9162d9467acf82da72ba719488	serine_or_cysteine_proteinase_inhibitor_clade_B_ovalbumin_member
03ee9aeded7b1e98ab679c08408dc694	conserved_hypothetical_protein
03eea977d60c199be17e5e5e7fe72212	bifunctional_glutamine-synthetase_adenylyltransferase-deadenyltransferase
03f2428e88468240e1e33dbecff4dbfc	LamB-YcsF_family_protein
03f3f0d96a84d45bac9cad55d4114458	diacylglycerol_O-acyltransferase
03f41dd3b14347646a17b0dfe8a827d8	Aspartate_carbamoyltransferase
03f42fd32c7c83b8148fda0bef02c1fd	succinyl-CoA_synthetase_subunit_beta
03f69341e4b2fabdfa3cbd6d3a53c26f	alphaalpha-trehalose-phosphate_synthase_UDP-forming
03f74edf7613500c311435803ded8f3e	partitioning_or_sporulation_protein
03fa4fe253fba669db3487b4e2cb455e	endonuclease_III
03faef76473dd4bd4f0475c35f62c184	GTP-binding_protein_Era
03fb9dbd5002d7ffdfdeaf99b9ca4183	alpha-L-arabinofuranosidase_domain-containing_protein
03fbe1fe621407937db5f264e08d060c	transcriptional_regulator
03fde7de391fa002e9b6e8368fc1ffe5	NAD-dependent_deacetylase
03ffa1afb1caa544444b44a7d8dbec18	stationary_phase_survival_protein_SurE
03ffba50eb5e07dea96f007e20784179	hypothetical_protein
040241ae3bc7600264e59818798dc7b1	hypothetical_protein
0402539f75174167ae61fb80f9bb8400	probable_secretion_system_protein_TadC
040360c473e8250706934e3ad1a107ff	electron_transfer_flavoprotein_beta_subunit
04043af0ff037377a54bf9fc943bf8b3	Xaa-Pro_aminopeptidase_family_enzyme
0404f95e69f58110b5d95e93db518f47	fumarase
0407575567f9b654285b21b0ac117e66	putative_phenylacetic_acid_degradation-related_protein
0408189b54d02766b998fffe25ccd3a9	hypothetical_protein
040bbfc352c4c6b41d237ff27e33e79d	hypothetical_protein
040e1405f35ea493094747e41f157be1	hypothetical_protein
040ed1720965381b5717d679830c76f3	glutamate_racemase
040fe1a3348465d763567b2ca245d68c	DNA_topoisomerase_IV_subunit_A
041077b517e7e0f1786e956ec9b36d0b	pyruvate_phosphate_dikinase
0410d30558aec005b842b34d69b11f6a	hypothetical_protein
0410e11882c04620c8c3e1fcce36c307	putative_secreted_protein
0410f7aebd0a921522a8c646f54a4bed	phosphoribosylaminoimidazolecarboxamide_formyltransferase-IMP_cyclohydrolase
0411596ca9e3d7355ab1f709d57a105a	trimethylamine-N-oxide_reductase_cytochrome_c
0411fe04d8509a0f1bcea54ff21ef349	General_substrate_transporter
04120bd9d60ceb974fbdb2fadfbeeeae	DNA_polymerase_III_subunit_alpha
0412a03d59adba12e7ebddef98373a52	acyl-CoA_dehydrogenase_domain_protein
0415f5915c4b5c5a599168dbdde4a2a8	methylaspartate_mutase_E_subunit
04163beffdc9ebef0716c8a5c0db0590	DegT-DnrJ-EryC1-StrS_aminotransferase
04164baa5e29da400588a742ac2460d7	ribosomal_protein_S3
0418ff377812f033cf77344c198efb0d	aldehyde_dehydrogenase
041923733ec8d6ef2bb3b0aa06be4f50	arginyl-tRNA_synthetase
041a1d1de93e334fa0bbdf4b16196c5e	GDSL_family_lipase
041a78bd22a218431ba66abd8950898e	major_facilitator_superfamily_protein
041add887d1b7f7c632ab9030c3d84a1	ABC_transporter_ATP-binding_protein
041b4c41e7911235eb45d821659fe212	Nitrilase-cyanide_hydratase_and_apolipoprotein_N-acyltransferase
041beaf44a0492bc67d61686e43eed94	bifunctional_sulfate_adenylyltransferase_subunit_1-adenylylsulfate_kinase_protein
041e016befdd7750bbdeec5a23c5b01e	NADHflavin_oxidoreductase-NADH_oxidase
041e3ecfa7475e7e0d8ba31cf1648e47	serine-threonine_protein_kinase
041e4af1db6f50b1d15d04aff1b41f7d	acyl-CoA_dehydrogenase_domain_protein
04220216a96dfe3db9a86a3805bfac51	ABC_transporter_ATP-binding_protein
04227caaf5e68154cf807a1853a1edea	phosphoribosylformylglycinamidine_synthase_subunit_II
042493cf25c20f84a95c5f720bc58a71	S-adenosylmethioninetRNA_ribosyltransferase-isomerase
0424ab2e8a671e1b05444c8458940b43	hypothetical_protein
0424c450841d8be709fd146299fcf2fc	amidase_hydantoinase-carbamoylase_family
042580b3b4757b3b077fc649f1c2abe7	cholesterol_oxidase
04263f5c9505a2c529906f1ba4c4084a	flagellar_motor_switch_protein
0427f9f3986500d75b809423b6c1ea5d	sarcosine_oxidase_subunit_beta
042873643746c378c742195efc68d765	ABC_transporter_related
042a25e561152c9f1aecd201bdf3c623	chaperonin_GroEL
042aa06277dd3452c9b89b74fc2d4f29	aconitate_hydratase
04315b74d7bef70fa04504478a2a09b0	putative_binding-protein-dependent_permease
04317074820c333dea84aed8391979df	catalase-peroxidase_HPI
043b25608fbc18557b96bb706c45d374	conserved_hypothetical_protein
043b77217dda57a7327f4afe1d359be2	putative_transposition_helper_protein
043d6857fd4a8de4d4052552b25c51c5	acyltransferase_family_protein
043d7837e2335b7ce39bef03a2ad86c5	histidine_kinase_dimerization-phosphoacceptor
04404a84ea6852d5320654706cd371b2	band_7_protein
044151c8480456e9df01386612915532	cold-shock_DNA-binding_protein_family
044164c3feface2bdde01b5dece59255	probable_acyl-CoA_dehydrogenase
0441daad7198c447a1da904b3edba220	PilT_domain-containing_protein
04423a422a83e11c6045390f878618c5	oxygen-independent_coproporphyrinogen-iii_oxidase_hemn
0443bdd5b8cba887eef835172ecad4d8	acyl-CoA_dehydrogenase_domain_protein
044850c88e8cd435bc9c7656d7f39a16	sugar_ABC_transporter
044c351fbf6dd4caccc6854144b7ca19	primosome_assembly_protein_PriA
044f592878538e367c358c9c1e106f92	conserved_hypothetical_protein
04512e7c38858334547c0e7fde79de68	glycine_cleavage_system_T_protein
045325bae1c04a642f41507434fa6082	putative_ATP_binding_protein
0454c4bb3e67bbaf7c6d9572fad84fb0	protocatechuate_34-dioxygenase_beta_subunit
0454e934fb4c031997864d9e5c2b1dad	TrkA-N_domain_protein
0456948a1e48484a9748997058356a42	ABC_transporter-like_protein
0456f73bf86af4b4dc96358597128825	2-octaprenyl-6-methoxyphenol_hydroxylase_oxidoreductase_protein
04570441adf0436896140ad75aaeb1e3	3-oxoacyl-acyl-carrier-protein_reductase
045864dc1dd5ede6a6bcedfc168a6dcd	dihydrolipoamide_succinyltransferase_E2_subunit
0458846e052d4fb35c18237b9b7dbe9d	medium-chain-fatty-acid--CoA_ligase
045939c401ea0467c8cfb701d0453640	D-3-phosphoglycerate_dehydrogenase
0459e71bbe23cdef20328f08dc2e81c3	glycoside_hydrolase_family_3_protein
045b5d3017137b68b793060055de158e	ribulokinase
045c62425b9fdf959e5e0357c3344a50	signal_transduction_histidine_kinase
045d0a2e763789bc03a05b8944147963	branched-chain_amino_acid_aminotransferase
045fd0d351046abb0e3496f135086065	beta-mannosidase
0461da9a69cca2d842abe11c4b991336	pyruvate_dehydrogenase_subunit_beta
046329a3a08e09150d3673238b95654a	polysaccharide_deacetylase
04638d63032e17fa2cfc34821db61952	band_7_protein
04666ff5d246177c75f3289d87576acb	lanthionine_synthetase
0466aa81651d2672c934ce345c217efe	metalloprotease_putative
046738d6fcd0fb7acc2f2c17c51e00e0	hypothetical_protein
0469971dc8bbf0ee52a515f01dbf390f	FHA_domain-containing_protein
046aadb79ce87254f69f316a4a6c86ef	hypothetical_protein
046acde54ed19a545b38a4cd27270aea	UvrD-REP_helicase
046baa9a4b94d6d3c0cc161b4dc793ad	AMP-dependent_synthetase_and_ligase
046bfba61a6590f60f667941e0562be4	alpha-ribazole-5-phosphate_phosphatase
046fa35f0a7a587399f1116d0d953fc4	helix-turn-helix_domain-containing_protein_Fis-type
0470f0431c0ddc74011872d4220e8baa	aconitate_hydratase
0472b619b9ebbfb622f8056b1ab0d5a9	lactate_dehydrogenase_or_related_dehydrogenase
047345957c31a30aa981aa0eeaee74be	thiamine_pyrophosphate_protein_domain_protein_TPP-binding
047382b79d95fa09e207484fec9440d7	transcriptional_regulator
04739897f134e8826f61be5dac18e449	peptidase_M28
0474620c9d2ab44c73f5119ea5357840	dihydrodipicolinate_reductase
04788b9f3bf3d792d6db77311da74b62	hypothetical_protein
047e321849a054a403aa5045b943c01f	ABC_transporter_ATPase
0480960edcb9a4cf1303e9900319104f	cyclic_nucleotide_phosphodiesterase
0480ce65e9842c0f08c5c81cc63df28c	hypothetical_protein
0480e20edeba8bc3cbec738148d5080a	transketolase_domain-containing_protein
04816829e3299a38aac84af4fd303343	ATPase
048465be0ef2a2911651b57601eb27fe	phospho-N-acetylmuramoyl-pentapeptide-transferas_e
0485f29ded4226bdcee8aed37bc37ae9	aminotransferase_class-III
0486a23ccdffbf7fa2ba0a28e0a03dec	glycine_cleavage_system_T_protein
04874e0e9c7a98b5414745c113f7bc28	possible_anthranilate_synthase
0488644f0a30482a989db2837e4a8b7f	DNA_gyrase_modulator_family_protein
0488881a5c0ec16b457afe8975855bc8	aspartate_carbamoyltransferase_catalytic_subunit
0488d0499759fc8b28fe2ab6d6aa9d98	glycoside_hydrolase_family_9
04893ba9e5075ea34023f21c90ca7b1f	sulfatase
0489ac12e7284e5b8bc5fc0b8bbd655c	glycine_hydroxymethyltransferase
048b422f1ecbb84f4ed2db37c63e1cae	phenylalanyl-tRNA_synthetase_subunit_beta
048e15783018a6391e2a01abb1264778	tRNA_uracil-5--methyltransferase_Gid
048e868eb4b1d572cfde7dd27185b144	alpha-beta_hydrolase_domain-containing_protein
048ebb1bbee67642b48ea9fb4f5ed262	putative_integral_membrane_protein
04903ff50c8a80660fe080dc781abf73	hypothetical_protein
049074c2ac4dd9c8f3b291566161bb4d	secreted_alpha-galactosidase
049413dd069dd865633bb5afdb1e5b09	peptidase_M28
04949dee728aa0ae39b86d9f77976075	polar_amino_acid_ABC_transporter_inner_membrane_subunit
0494d046ba970a941f4824492e901e39	FeS_assembly_protein_SufB
049640caf0be36f20a3a25a1d452c91e	adenylosuccinate_lyase
0498264a7cee8e2cbd81c543597292a0	enoyl-CoA_hydratase-isomerase_family_protein
049896ccd6556aa67abcd49486fb89aa	peptidase_M16_domain_protein
0498bf363fec8bba7b8ddf8d68708256	ABC_transporter-related_protein
0499569275bcc0d75355224656891501	hypothetical_protein
049a23f209c9c471abf0e99e29da2ab5	putative_amidohydrolase
049c528b6609784a0790432bd930cb8f	DNA-binding_two-component_response_regulator
049deb8fb784cb53ec0792aec85aadca	hypothetical_protein
049f96b74c457e591da3d6f8b9dc05b6	ATPase
04a08ce3276b06030046eb64d01da3eb	threonyl-tRNA_synthetase
04a1e095290c9d1df778612391c70626	DNA_topoisomerase_IV_A_subunit
04a2f52a24072c3d26c9627e8410c538	NAD-dependent_epimerase-dehydratase
04a3f04524747f7a205c098abb3b4a66	hypothetical_protein
04a5195b913eadb8b9cf1236d55991a3	two-component_system_response_regulator
04a78f06868685e4c4e0542ed1805481	glucose-6-phosphate_dehydrogenase
04a7dc06a5c0040679c32415ec55e767	putative_glycosyl_hydrolase
04a7fdc0c533afe331127feb11e93a4c	serine-threonine_protein_kinase
04a8c7a821c01a583de96bca1adb9a99	glycosyl_transferase_family_51
04aba822f2896b1e36970be2009301e8	peptidase_S9B_dipeptidylpeptidase_IV_domain-containing_protein
04abe48de6c8f942aeb4f166af691fa5	polyphosphateamp_phosphotransferase
04abfc938f16b84cd9286fda760b517d	putative_transmembrane_protein
04acd9f4be1b458e411c6b8b8eb238f2	aspartate_aminotransferase
04afae33d1a2e0c40053e1dbfc5d8cb0	methyltransferase_type_12
04b09c3ee4b40ce6cbdc38643c6b812b	PntB_NADP_transhydrogenase_beta_subunit
04b0ac3b1960d66df1abb97e21eacde3	DEAD-DEAH_box_helicase
04b1d66eaf6c1a9e499e2ae9ad5b8f38	DNA_binding_domain-containing_protein
04b33345e0eca9628c8ab9d8aa8060d4	major_facilitator_transporter
04b508bc77352bd0b31ac3f68a4fd801	catalase
04b69be5f75ca03d56dd95fe3ad79dd4	4-hydroxy-3-methylbut-2-en-1-yl_diphosphate_synthase
04b8b72431f167a457c0cc0b359b926e	excinuclease_ABC_subunit_A
04b93fd7c38a59159af103ca869f6f86	aspartate_carbamoyltransferase
04ba794272df866218e6cdb5f152cb65	UvrD-REP_helicase
04ba9bad0ebc6b0e4b71fcdc6c8f61d5	carbohydrate_kinase_FGGY
04bb78560ff564c1c853ba98228284cf	hypothetical_protein
04bcd8dea9f3be63e227f8d4cf47da68	phospholipid-glycerol_acyltransferase
04bd6475505e2ede5ab1764a14f9ac66	thiamine-phosphate_pyrophosphorylase
04bd9114134e09b03db07ae8a054cbb7	inner-membrane_translocator
04bea8e3fd0fc17416e42916d4c8cfb9	ECF_subfamily_RNA_polymerase_sigma_factor
04c10e52926f04b612889b66200d0df2	ATPase
04c80e9afeaf03e85776c953bbfec8e2	glycosyltransferase_protein
04c829a33480b9be119a18e3560a76ad	phosphoglucomutase-phosphomannomutase
04c9309502395cb7bd82e764f0672b93	MarR-family_transcriptional_regulator
04c9c90e0b43f2f19b2c212621776ad3	Ppx-GppA_phosphatase
04cbb1f2a80836d3dadf110cd5413932	hypothetical_protein
04cc5e8313d94b1d2bc4c8cff53c2bdc	6-phosphofructokinase
04cc718acfc197038478df7f240f7102	DNA-directed_RNA_polymerase_subunit_alpha
04cc8feb76262133981dd19ba62f8c69	ABC_transporter-like_protein
04ce7a066a8140747e94c606fce09e21	hypothetical_protein
04ce882caf463ed3e51eeb0913ab9ffd	Acyl-CoA_synthetase_AMP-forming-AMP-acid_ligase_II-like_protein
04cf67f50da182e8805a95d4544d001a	potassium_efflux_system_protein
04d03dea878bd9efe27f8017fb9cca48	putative_ornithine_cyclodeaminase
04d08ad88fa910b175efbd7715f08eac	Methyltransferase_type_12
04d115a12648a4ac320a87a1d4290544	ferrochelatase
04d1c38583b56f9525527fbd441984b0	ATP-dependent_metalloprotease_FtsH
04d2ab8f2ed85135c3057befb6751e5d	glucose-6-phosphate_1-dehydrogenase
04d306737b1699f52d5377500fc4d3bc	hypothetical_protein
04d3f2992320e7064fe06ad29a5a03d9	Signal_transduction_histidine_kinase
04d522b620695d8d2f8c0c9991f642ef	TROVE_domain-containing_protein
04d78ca51e0d253fd02342090bfe9acb	septum_site-determining_protein_minD_cell_division_inhibitor_minD
04db54003e2bc2d04b2fbb1a2be1b313	NAD-dependent_DNA_ligase_LigA
04dcbd75ac551d938d737cd316d054b3	protein_kinase
04df487c88fa7a12efe70018763ed558	phosphate_abc_transporter_periplasmic_phosphate-binding_protein
04e099ced88b2e3c3dab56f2c467b3e3	ribonucleoside-diphosphate_reductase_beta_subunit
04e4caf4a8f2083dfe7f468768a30c92	alcohol_dehydrogenase
04e86cba30bf70e713157b6e114fca99	adenylylsulfate_kinase
04e93bdfceee1aabc5666e9934d2f1dc	Oligopeptide_transporter_OPT_superfamilyOligopeptide_transporter_OPT
04ea20efb523c16c653ce747a00bd72e	hypothetical_protein
04ead881641fddcb79cb4be29e981284	oxidoreductase_FAD-NADP-binding_domain_protein
04eb5ebb1cd9b24ab68b1ca83d557a64	pathway_specific_regulatory_protein
04eda44af8f2a0f16c91b985c2dbee9a	glycoside_hydrolase_family_3_domain_protein
04ee85ceee1418fc2e8dfbc08baf3345	S-adenosyl-methyltransferase_MraW
04efc14bf8d0f11a481e8a974debafb8	IclR_family_transcriptional_regulator
04eff3a60cb092262b514674689ad409	muconate_cycloisomerase
04f303dcb6af200267969c68310c674b	Propanoyl-CoA_C-acyltransferase
04f4359b60245975822330eef67e1cbc	permease
04f48b013e67fdb3df1b00f322de9a53	acetate_kinase
04f9201a7c0216d2266a76c3f965dc05	DNA_polymerase_II
04f9d96d7803a4a797f37aef1000b084	OsmC_family_protein
04fac36ed5e6bb4e17c1244f46ad571b	dihydroorotase
04fd8eeba643c45c1b847fd566236d0e	cell_division_protease_FtsH
050055ee612ac05a937a8a0bc7a03335	major_facilitator_superfamily_permease
050096699f7523b92a7dd9126bdb4b2b	S-2-hydroxy-acid_oxidase
0502474131f8a80287f729f7d8c429ca	phytanoyl-CoA_dioxygenase
05044c709fe036f561e9e972012ebc04	erythronolide_synthase
0504def5954fe82e466a3d678aa312e3	cytochrome_d_ubiquinol_oxidase_subunit_II
05051f12415d47024bc4cfd71ac89ee0	ECF_subfamily_RNA_polymerase_sigma-24_factor
0506299fa83aec72013205674173ef6c	SARP_family_transcriptional_regulator
05074f96bf16b592f6e5ceabfa3d7775	glutamate-1-semialdehyde-21-aminomutase
050b3f862bc1d31c5fa222284b8bdb8b	UDP-3-O-3-hydroxymyristoyl_N-acetylglucosamine_deacetylase
050df7bd0eb3a29e83e8f2d49fc4c702	lysyl_endopeptidase_domain-containing_protein
050e631f210fa1250bcc80df7a98ded3	hypothetical_protein
050e719b1aa76c126cbd67c8555adf1e	FAD-dependent_pyridine_nucleotide-disulphide_oxidoreductase
050f75b76ce0021ae52b9f59b6ccac4e	30S_ribosomal_protein_S11
0510480c07955f2a18503d6e427ddc30	mandelate_racemase-muconate_lactonizing_enzyme_domain-containing_protein
051159d11b21c7fff86e51d0ce0d330d	2Fe-2S-binding_domain_protein
05119bf8811ea0cc1374a20f3e62e8a4	hypothetical_protein
051496ed70923ef187e68b43656cbd1f	dihydroorotate_dehydrogenase_2
0514e98d570913a9b000d36ae8927663	Deoxyribodipyrimidine_photo-lyase
051648983df0130baa27b916116fd8cf	arginase-agmatinase-formimionoglutamate_hydrolase
05167872bd74d7ec24b91b8c801c0733	hypothetical_protein
051810318710f6922236fbe0afa6d753	methionine_synthase
051dd335018b6c50c8d3d16737c472d3	manganese_containing_catalase
051e6bdc687075fd5b77ced00f7e07bc	deoxyguanosinetriphosphate_triphosphohydrolase-like_protein
052029b1063477aa85b43cb447148ef5	DNA_mismatch_repair_protein_MutS
0521c65d84ff2d71fa1167a1fee41f1a	3-oxoacyl-acyl_carrier_protein_synthase_II
0521cfa7d1115416e3d2a6ab3c27887c	serine-threonine_protein_kinase
052406808cfd68dfaf8c176434644858	hypothetical_protein
0524076aef4c3572e10ec656caf14b73	XRE_family_transcriptional_regulator
05250e0f8355e09742ec1146668e68ff	response_regulator_receiver_protein
0525539a17b4a34757657834d0c4cbf5	putative_dienelactone_hydrolase
0525d051e44d4f29454ddb40bd74bf58	aldehyde_dehydrogenase
052750396e527d982b3e2bfd6ff0f90e	inner-membrane_translocator
05287a9f66c2e3893693f91b7ffffe46	hydro-lyase_Fe-S_type_tartrate-fumarate_subfamily_alpha_subunit
052b3fb7af6ea843f98a96be4b00f29f	hypothetical_protein
052fc66e05c56c8aadbafe8920175675	ribulose-phosphate_3-epimerase
0533fec22318d145d42e23398d69a15a	hypothetical_protein
05364bfd801ac60a4e50ccecd93e6fca	aminopeptidase_P
053879b3fecca18e277e7fc90c17898f	dihydrofolate_reductase
0538be7f078619934c34a6f04adebcdc	Xanthine-uracil-vitamin_C_permease
05398b34be28959ac750fa1264754e66	cell_division_protein_FtsZ
053a7fab10060a21286dc759247fe67e	FAD-dependent_thymidylate_synthase
053b3c0b18d78f6b3a2a6cba28e98997	glutamine_synthetase
053f00eeaa7473c8644b043e68f7c837	alpha-beta_hydrolase_fold_protein
053fc313bbc43660e9f8010047271734	TRAP_transporter_solute_receptor_TAXI_family_protein
05428f571e3ba0cc9bced9ba4f21e8b3	electron_transport_protein_SCO1-SenC
0542f713f6ba326642d49d110e7ab9ee	histidyl-tRNA_synthetase
0543798b3d86709dde69061d23ae075a	bifunctional_aconitate_hydratase_2-2-methylisocitrate_dehydratase
05439ca3c35ec1d7f8d3c3668b76a072	hypothetical_protein
05463aa94a2e15f6e9bf12b1b1af9b99	GMP_synthase
05481dd66e1accc9d8f59be057c97cbd	purine_phosphorylase_family_1
054b0c8dd4fbc35a73a29f68f7bdaa60	gamma-glutamyltransferase
054d33f254457083dcdae6ba0a36aef4	EmrB-QacA_family_drug_resistance_transporter
054d60486a6eda91e2285af73ebb786b	6-phosphogluconolactonase
054d790bf4bfbb6c5f2b51701de1becf	primosomal_protein_N
055154343220e02b0b4dc39b6a673e8c	squalene_cyclase
055400d53bc649d73ffd3e557cc34640	argininosuccinate_lyase
0554179c75bde860664cb55b2c5d9c03	hypothetical_protein
0555425c76066c1f79dce99757b70d5b	MaoC_domain-containing_protein_dehydratase
05559f4e18d2e6570fb470cdcb020096	hypothetical_protein
0557793566e41a246d37e481c51817b6	MiaB-like_tRNA_modifying_enzyme_YliG
0558ff6de9715e3ef7a7f4d4db17e856	undecaprenyl_diphosphate_synthase
055a79207fb95ecb4ca98f761f8ee0f8	3-hydroxybutyryl-CoA_dehydrogenase
055c2f90e535800227b1d8ea60e89a2c	cell_division_protein_FtsA
055c6a86ee12aa4805fa60a87d15706c	ABC_transporter_permease
055c832df41e728f3664ffc7576198b0	pyruvate_phosphate_dikinase
055cef9bb8e9fd8cdd17fdb8bcd3a63a	protein_kinase
055f9af6434d3982453e13a5fa14e233	3-oxoacyl-acyl-carrier-protein_synthase
055ff0870d52c21622b018cb96a5d1ba	peptidase_M20
0561310cdea2d420f0174cf3650d1644	Aldehyde_Dehydrogenase
05614b8c348bfc2eff5fad15a164fecd	extracellular_solute-binding_protein_family_1_protein
0563af205c179dcda2ef19785ea7bc38	NADH_dehydrogenase_subunit_D
05651fa09a00e46de63bc26dd3d9be08	Fmu_Sun_domain_protein
0566b0c48f242f07306e1ad8f78e0e9c	peptidase_U62_modulator_of_DNA_gyrase
0567cb1f95020f31e388435e58b10ffd	binding-protein-dependent_transport_system_inner_membrane_component
0569267ecdbe9e86c60f2532849eabc8	DNA_gyrase_subunit_B
0569873fa0deb300960ed6859d83b443	endo-14-beta-glucanase
0569b31c2933a3e0f1c715e2342de651	peptidase_M24_family
056a171a3f7fcfef277c3e26024bebf0	elongation_factor_G
056c2931bc392d9d50cf8c9028ba6219	polynucleotide_phosphorylase-polyadenylase
056d6ac72a018c19aaa9d08e678edc75	hypothetical_protein
056f097caa5d64c76d3728ddbd21fa24	precorrin-4_C11-methyltransferase
0571f9639f384b5c3deef96320713533	alkyl_hydroperoxide_reductase_F52a_subunit
057527544e96c5492886752a3fdc6f09	carbamoyl-phosphate_synthase_large_subunit
057bf220602a142b251e0e5772deed72	anthranilate_synthase_component_I
057fc6c2fe918fefde1133b8ad9ac4af	malate_dehydrogenase
0580b2320f053c0b8f97cee08cd72222	peptidase_S8-S53_subtilisin_kexin_sedolisin
05820b986ae3d97375c88c5e97d70dec	ABC_transporter_related
05827561e754ebd1783646e2ca6ecec3	hypoxanthine_phosphoribosyltransferase
05891dfdbaed34ae66e43dc23558c927	type_II_secretion_system_protein_E
0589e48f61269f4de4fc8b9cc88cc9db	hypothetical_protein
058a95251a99b4e3909a5bded63ca56a	uracil-DNA_glycosylase
058b4559eb1854879badb0f98a1aec67	hypothetical_protein
058b4dbc520418b3a4397aecac6f0262	GGDEF_domain-containing_protein
058cd44b10e916d3a599f979a8b255b7	aldehyde_oxidase_and_xanthine_dehydrogenase_molybdopterin_binding
058dc302529636521454238727c76aa9	single-strand_binding_protein
058ee680d72e662b070b64fd2c631913	hypothetical_protein
058f14103cf7939ea349ae6805adea27	hypothetical_protein
058fc34615956a9d91d477d38a817363	acyltransferase_3
059022e5d354816bd9d2b9fd6598d27c	DNA_polymerase_III_subunit_gamma-tau
05914800748b3c9c3c92098036399b17	glutamyl-tRNA_synthetase
0593908ac8125e22225b6cea347b4fd1	NuoF_NADH_dehydrogenase_subunit
0594afcda4a57eb72d947ae9b8cca2a2	flagellar_biosynthesis_protein_FlhA
0594c8293e2368e22769de50e5ce5e84	integral_membrane_sensor_signal_transduction_histidine_kinase
059718eef49780c5f0fdf2866f963339	Cystathionine_gamma-lyase
05972f24e892505c0a42ba878e0a9b13	tetratricopeptide_TPR_2
0597ec10dc158035830ebcb6bd21360a	hypothetical_protein
059a952c78f54501a3657384ec81e3fa	phosphate_transporter_protein
059b045e06b83898df8398671570d806	hydrolase_CocE-NonD_family_protein
059b2ff41a2d2104cb0d254b5045218c	glycogen-starch_synthase_ADP-glucose_type
059b6d1ccedd478460f64d2b08a6a101	recombinase_A
059b7c57bf52b7cb51e124605d7edb9b	porphobilinogen_synthase
059bffb81397845241518eecef595df1	ATP-dependent_Clp_protease_ATP-binding_subunit
059ff26fedb72f29316ab8e065798d83	serine-threonine_protein_kinase
05a01b68aa619e75430ee1df2de643dd	AsmA_family_protein
05a0a953d354a2c3ae87515c8278b0c5	non-hemolytic_phospholipase_C
05a0c2bfd5e770df4a834dbfd689d874	TonB-dependent_receptor
05a0d9e14754a6c7de7b6d4e82295f30	polyphosphate_kinase
05a0ef8844c0830f013a62a3723661a6	cytochrome-c_oxidase
05a4a08ada9978fd6f0e791815c38c32	fumarate_hydratase
05a591c3c9c1995d3406a71d82c957b2	PAS-PAC_sensor_signal_transduction_histidine_kinase
05a8c377707f8ba1b974bb8b9e19cac7	transcription-repair_coupling_factor
05a8fcf5bd8a1fc580bf291720086aeb	peptidyl-tRNA_hydrolase
05a9b6622d41c2c85dc9b6273340695f	heme_exporter_protein_CcmC
05aacfd6adcec47f78de94bc96f0a620	ABC_transporter_related
05ac0788a2cd96656c3fd2c0bd46a5c5	fatty-acid-CoA_ligase
05ac2e26bff52fe078a44e41fd9c5347	NADH-quinone_oxidoreductase_H_subunit
05ac64e6d8be40c6ff027ec62606c7de	NAD-dependent_epimerase-dehydratase
05ae59cf2ff9221ff43a6b3ba8033cd5	hypothetical_protein
05b02b021f8ab16100360530d1ebf2bf	hypothetical_protein
05b0a539ddbfd468bf82803e21843773	50S_ribosomal_protein_L1
05b18ac004183eb4ebb6f31acedb7135	hypothetical_protein
05b3d81fc1c58cb9248691b05594593b	2-isopropylmalate_synthase
05b49432d4c1b5333e661774dcfc94fc	putative_ABC_branched-chain_amino_transporter_periplasmic_binding_protein
05b6216ca454ed163fa4973304c78d7e	haloacid_dehalogenase-like_hydrolase
05b9213b611224fc9b163881122f27b4	2-hydroxy-3-oxopropionate_reductase
05ba808aab8eab22253b423d17846ae5	N-6_DNA_methylase
05bc2add5a6d3187d3b636cb6441a535	amidohydrolase
05bc76f83be4fc49dfedbd5ae6dc6819	potassium-transporting_ATPase_A_subunit
05bde44159cf524b9c44d5d4a9f997d6	nitrate-sulfonate-bicarbonate_ABC_transporter_ATPase
05be14a8d7c08876d804a3048a470814	glucose-1-phosphate_adenylyltransferase
05bf869c1d8ed1fbf47389ff6b81cdfd	HAD-superfamily_hydrolase
05c02f380d2dbf71f14b15108e9cff03	delta-aminolevulinic_acid_dehydratase
05c0bce6f6590949d7da6c17e2ce139c	putative_ATP-dependent_Clp_protease_proteolytic_subunit
05c32d13f50e406b93076997ebd7d42e	short-chain_dehydrogenase-reductase_SDR
05c3cc2a7c00a048b2106ff8e076b25b	DNA-directed_RNA_polymerase_subunit_beta
05c3d9079bf31c3baf610c3d68d35b81	transposase
05c8e650f4d2da85aef8727c0d28fece	dihydropteroate_synthase_DHPS
05ca67d773cf1ad60c0e0aeb10e3d096	AMP-dependent_synthetase_and_ligase
05cd0ff956c1452b4e098f5734a631f5	DSBA_oxidoreductase
05d141c8811086f666fbd1f0bd1990c8	A-G-specific_DNA_glycosylase
05d1e4f7a8ba7f8edb504008eeb28ced	aconitate_hydratase_1
05d268e5f51221f1b6f8a2856916fea5	hypothetical_protein
05d37840e1d8a19c1edabd1d1b4850b7	PTSINtr_with_GAF_domain_PtsP
05d4409c3938743d4707fca84c990e69	hypothetical_protein
05d664cb99da0e1b46c50d1090536242	ATPase_associated_with_various_cellular_activities
05d692830dc3f86d3c04af602c29186c	hypothetical_protein
05d855b5a93010c046dd245f4c855388	hypothetical_protein
05d9a76289887a38692a1c9c020565bc	iron-sulfur_protein
05dae981ef8da50f390acb03ae3afb15	farnesyl-diphosphate_farnesyltransferase
05dd7317017a7d49315dc78e28ed6c8b	FHA_domain-containing_protein
05dde39377f8f6be9855b0210a6f5aa5	lytic_murein_transglycosylase
05e01c1a117df7bc13eb5da28e72127b	phosphoglycerate_mutase
05e2e4516e78a06101c65fe567301a17	HpcH-HpaI_aldolase
05e55fac850446c68eaca741efed9623	4Fe-4S_ferredoxin_iron-sulfur_binding_domain-containing_protein
05e7c948242ce8a0d1f1b27d4f3047c0	oxidoreductase
05e8160cf3ba86e15226ed41d8c70177	hypothetical_protein
05e81ec1269e016995715b89f9c57a99	hypothetical_protein
05e945cd7a217efb771bee91ec5a602f	secreted_alpha-galactosidase
05e9d4304aef0482fad05818512a817c	secreted_protein
05eafdaca442af008ba6b61d7351301e	hypothetical_protein
05ec176783251a4e2f5c73b24643aa2f	ATP-dependent_protease_La
05ecf02242213a8410bbc2eb22547631	C4-dicarboxylate_transport_protein
05ed6c457e7490e0ce7a3438bc94405a	methyl-accepting_chemotaxis_sensory_transducer
05ed93de180661735ff519316039c911	two_component_transcriptional_regulator_winged_helix_family
05edda6d3c59f3cd26497f2ad272ca53	HD_domain_protein
05ef5cd77ca2e09fc2add75f7846ca0a	hypothetical_protein
05efbee7b61ccf550da811d180617923	GTP-binding_protein_LepA
05f0591909587e51248f42cd9b77d7e5	Glucose-6-phosphate_isomerase
05f0cc095426b1a38cc8fa4c89957d6b	hypothetical_protein
05f1c2768849b2a2dd73013a76379d10	conserved_hypothetical_protein
05f1d792f5bd994034744671442bf3e6	ErfK-YbiS-YcfS-YnhG_family_protein
05f252c71ed08f791ab10292904b7cd4	hypothetical_protein
05f322c38aeb861a9608a19ea7a1eff0	Activator_of_Hsp90_ATPase_1_family_protein
05f383984f14be13c511be1aba4d6aca	probable_acylaminoacyl-peptidase
05f9fb38650eb2923219f6e60318db33	Acyl-carrier-protein_S-malonyltransferase
05fb904966e3625930ef2d94eb8037ce	alpha-ketoglutarate_decarboxylase
05fbc61d6effaac84b13a3f650e177eb	flagellar_MS-ring_protein
05fd243ac347a0e558f40605f8928a92	fatty_acid_desaturase
05fddc993af7909cf8a605949f10deda	acyl-CoA_dehydrogenase
06025334dc31db83c6807655ce814917	cytochrome_c-type_biogenesis_protein_CcsB
06027554eb25caef34f302ed7c1c8b50	fructose_16-bisphosphatase_II
0606ba3088ef56aee100250828c62618	deoxyguanosinetriphosphate_triphosphohydrolase
060b0ad38254dbb7bba2dae57b395adb	fatty_acid_synthase
060b11c7e2d3bb69c6c9fd29b1b4b2cf	adenylate-guanylate_cyclase
060d89fe7de642a9bf150b0b19f0e0d0	DNA_gyrase_subunit_B
060da786898636e6ceefd91d3c7b216b	2-oxoglutarate_dehydrogenase_E1_subunit
060fb350da003e80289c32f82c68ba43	methyltransferase
061011d0d26b17526aa82902d576a2c7	hypothetical_protein
06103d146e5f7600e1e2e5197a791709	alanyl-tRNA_synthetase
06125a48e7789a1005648cfa2c641146	putative_tolC_outer_membrane_protein
0612bf310cb6865a35c7867c157f8d0b	30S_ribosomal_protein_S11
061390e79156980d19bb1ff6989589c3	FtsH_peptidase
061441ab5c110ac486e8405f28f1a534	hypothetical_protein
0614b22520996c91875d556ceda48217	NAD-glutamate_dehydrogenase
0614dee8d2e8585730fd8f6e2185ae9d	putative_two-component_system_sensor_kinase
0614e888d0b66170b5ac849a259f60db	alcohol_dehydrogenase_zinc-binding_domain-containing_protein
0615f5dcfe205c57979073acb16af0ed	alpha-beta_hydrolase_fold-domain_containing_protein
06160efc5441f62dc1b1368f0e9c0c9b	hypothetical_protein
061614e79393ebe9852387bcfc022edd	hypothetical_protein
061651a3feb0fa46116bcea58b28ee13	putative_trehalose-phosphate_synthase
0617ef3804a9a2555e4e00ea3c050783	argininosuccinate_synthase
0619c1e879c42b21a8a51229826b4bae	F0F1_ATP_synthase_subunit_beta
061a4715ba02605947ed4393c196cab5	DNA_mismatch_repair_protein
061a5f54d2f444799845fdd97080981b	nitrate-sulfonate-bicarbonate_ABC_transporter_permease
061aa6f0eed182b38a9e497cfcc32671	hypothetical_protein
061d301ca9b8f085c8ebcba1972e4c92	Mandelate_racemase-muconate_lactonizing_protein
061e21c914f98c6800417e1bfd9a259e	sensor_histidine_kinase-response_regulator
06210475ca53cdfe4e39b5d1c4148892	putative_ABC_transporter_ATP-binding_protein
0623a8b7fb219da6245caabe9966cc65	putative_ECF_subfamily_RNA_polymerase_sigma-24_subunit
0627126aed5ba92e6a0000d1fd67f723	dihydroorotase_multifunctional_complex_type
0628f2c1e7f380d40612f8067cdbda2b	acetyl-coenzyme_A_synthetase
0629899485a4081d8364b46e744473fd	undecaprenyldiphospho-muramoylpentapeptide_beta-N-acetylglucosaminyltransferase
062aa8f99c83b74e29a525b3435805b9	binding-protein_dependent_transport_protein
062ad79c2e8a6f8fe8ef674ef3a2a8e2	hypothetical_protein
062cd558bff38d14c7e4240b92a70ada	alanine_dehydrogenase
062fd1a323e4e2abc8f5aaf941cbc1fd	phosphoribosylaminoimidazole-succinocarboxamide_synthase
063066132134313ae848e71fc2954de6	phosphopyruvate_hydratase
0630c467d0ae57356d97312731d5285b	isocitrate_dehydrogenase
0630e3afe9cb7fe23ecee3579c961c87	GreA-GreB_family_elongation_factor
0632358a056261b4c4266ef087f6ace7	acyl-CoA_dehydrogenase_domain_protein
06329e93214ad18287e6d25a388d4e65	transposase
0633d1bde04cc13dfb6b5378345bbf61	GMP_synthase
063624306c86a3e5ea9fb636f9890fd3	peptidase_M16_domain_protein
063c5238da5e03007e0675becb032015	transaldolase
063d11b53763bd14e32c442b05cd85b5	hypothetical_protein
063ed7f9995fb1208a9a7c16183f36ff	putative_secreted_protein
0640e8d5092d2b0af191dc1e8806cda1	DNA_integrity_scanning_protein_DisA
06437d20517adeb41b68373059603bff	hypothetical_protein
06441d8cc6b335f3be2fb16946459f70	metal_dependent_phosphohydrolase
0644423b7c0b5c375bf14d7e41ef1e77	phosphate_ABC_transporter_permease_protein_PstA
0644e128bce09d27ba126010aa17b2a3	translation_elongation_factor_G
06456a8ce49e757877a7df66ba4c78df	glycerol_kinase
0646a4bd0487c60b80e813dd56e0992a	DNA_gyrase_subunit_B
064703dd9f48d96b77830918852837e2	D-lactate_dehydrogenase
06471ee41849c7a5e7d8136991a79f46	hypothetical_protein
064a7636763b296415c17182327e0e40	NADH_dehydrogenase_I_L_subunit
064a7d78ba2c569986acd981c9030252	helicase_domain_protein
064a8014a8643f41aaa4d8dd33a851e7	putative_dihydrolipoyl_dehydrogenase
064ac77a305ab24ff760430dcbb50caa	fatty_acid_oxidation_protein_fadB
064b14d92008d871cbb722bd8779546e	RNA_polymerase_sigma_factor
065065e910f8c2000a8ea7e92dd47723	aldehyde_dehydrogenase_protein
0651dd53756cb4d81d23338ca0301768	hypothetical_protein
06524e5571617ee72471f9db8deee3f4	aldehyde_dehydrogenase
065332f0d7ced5bb3584c01ebcb4dc99	flagellar_motor_switch_protein_FliG
065342a58c3c3fb3e2958c8133bdf75d	conserved_hypothetical_protein
065524236dd3aa10cc71f0aa89ebeb3a	nickel_ABC_transporter_permease_subunit_NikC
065615489fa11579e51aee95f4fbd702	mandelate_racemase-muconate_lactonizing_enzyme_family_protein
065697fa9a81562ba10ddbd8fb78c6a3	peptidase_M61
0656a60748deffc4574826618df2a24e	phosphate_ABC_transporter_periplasmic_phosphate-binding_protein
06579e665a98980e39884e1d8bbbf332	lytic_transglycosylase_catalytic
06583e3a1a87bc2633e522d1bc553929	DNA-directed_RNA_polymerase_beta_subunit
06590f07904c9aeecdf34d40a18bd489	hypothetical_protein
065a49dad866e46f5d0c3588f2268d3f	major_facilitator_transporter
065b6016b3c3542adca1c8540cd883d1	putative_NUDIX_hydrolase
065cbc4e607c87261526c24d6fb398cc	ECF_subfamily_RNA_polymerase_sigma-24
065e3612cbbe4b2930d6b0230d2e1458	NADH_dehydrogenase_I_chain_F
065f731d06f2505cf3522bf316b08676	acetyl-CoA_acetyltransferase
0663da732bdeb0d8a2d0819321bda472	7-cyano-7-deazaguanine_reductase
0664c3e3e48a28839b9732c0ee292a6b	translation_initiation_factor_IF-3
0666c5b5da15dd42b20c1f5c31be2e5e	NADPH-dependent_glycerol-3-phosphate_dehydrogenase
0669fdf19e515bede20d3041a00aa5dd	allophanate_hydrolase
066a8333e46a47987e6bbb9bca49b22f	oligopeptide_ABC_transporter_ATP-binding_protein
066bc0d2ce7f9b0592b7c1a3cd36693a	thiazole_synthase
0670be3b99a9ec9cd85150509f9d5eab	putative_methyl-accepting_chemotaxis_protein
0671993d89f30ba4ad8e8386afa91796	Enoyl-CoA_hydratase-isomerase
0671cd3411cd8e2f3ddfb444b3500e6d	hypothetical_protein
0676a5004d2b06b6239997752e85efc3	chorismate_synthase
0677c248bcb1a53a710a360845a8ba8e	FG-GAP_repeat_protein
0679f4525656ac30a55e15653e34a9e7	isocitrate_dehydrogenase
067acd4a8f39bc0b628783dc7538f85c	protein_of_unknown_function_DUF899_thioredoxin_family_protein
067ae088ecba22efecc65efa7c00467f	cold_shock_protein_B
067bb84a9815a1e77d1ba2302813b704	sugar_transport_protein
067c1dc8fd9a4b95a7b0f896ab72a4ec	NADH_dehydrogenase_FAD-containing_subunit
067d69b4d98ef4bf4de4e83b67631f62	probable_sugar_ABC_transporter_permease_protein
067defe8f1b99bd87933fb46da6a1769	L-idonate_5-dehydrogenase_protein
067e0f41d652e3e2eb2e2b4b9517bc0a	DNA_polymerase_subunits_gamma_and_tau
06801af032283dfa4f5bcd27a32d7a81	Phosphopyruvate_hydratase
06813930a8ab09993db24c879f55c7b9	proton-translocating_NADH-quinone_oxidoreductase_chain_N
068248fee8b138719787d586975aaa39	long-chain-fatty-acid-CoA_ligase
0683bf1bd1a8d1844d1eb1b1ae5d8021	virulence_factor_Mce_family_protein
06847905d6429049c195b899d9522bac	cholesterol_oxidase
0685fee4e0a664f988d2aa5ed6539c9b	histidyl-tRNA_synthetase
06870d8efb954d24fba3a5a2be76a093	major_facilitator_superfamily_MFS_1
0687206866b3fe9a54dac5651fba3c39	hypothetical_protein
0687520bc4116976cb305fc86cc408cd	gentisate_12-dioxygenase
0687c52b27e7e103e51ba658597ca6c5	glutamine_synthetase_type_III
068a4c407c2a6742207a627fb8070dbd	macrocin-O-methyltransferase
068a6eb613b7b04767445f78ad2c9ea4	bordetella_uptake_protein
068a747e8503c39d7b4f5d65b67fab08	ABC_transporter_substrate-binding_protein
068ac0af50d2d033e30864edb9f283ae	carbohydrate_kinase_FGGY
068b3467d37d43cb443eee20e946a828	molecular_chaperone_DnaK
068c39d9cfc4d3539e5dbcc970aced01	hypothetical_protein
068cdda705ef3a1924f0601fdd9cb340	hypothetical_protein
068eaa39941fa7a112ea4bfc0e2e1108	GTP-binding_protein_EngA
0690662e609f7a4b1a62bd33710c52ca	threonine_dehydratase
06907c2eda211aa4ed0a2c3a4bb3c2be	protein_kinase
069107844c91e8d9ec8b75ffc4670759	oligopeptide-dipeptide_ABC_transporter_permease_protein
0691adad371e5fde1ee3a6c67126b5bc	beta-lactamase_domain-containing_protein
0693ebb113dacf9e79bedf40e80d2c46	queuine_tRNA-ribosyltransferase
0694f74549ee15d97dd332d1e14af74a	small_GTP-binding_protein
0695abd1ee590512c28014a8544d5a4e	precorrin-3B_C17-methyltransferase
0696c03ace22019e6523a58cf14ecbb1	phosphoserine_aminotransferase
06982164110e72207618728a41708188	radical_SAM_enzyme_Cfr_family
06988b0e21fba30ce6255be2bcc7d079	serine_protease
069af7081c8c998c50e412244002211b	30S_ribosomal_protein_S17
069b33240e569401685aac6cca74ca14	Lactate-malate_dehydrogenase
069c8e7816b367e4744764e0999b1598	O-methyl_transferase
069c96eef290fff9c0879a1ee357dc9e	Rieske_2Fe-2S_domain-containing_protein
069ca209b5ea4842bcfb4ee820b82e8a	hypothetical_protein
06a04009ac5a2f93cc295e4ced7ba40e	conserved_hypothetical_protein
06a1391ee60ab2d4f2145ee7b54700ba	ubiquinol-cytochrome_c_reductase
06a26de503d7746584220c18d3a69b1f	bifunctional_glutamine-synthetase_adenylyltransferase-deadenyltransferase
06a292909ab6ab220fe4dc966e1c5215	ATP_dependent_DNA_ligase
06a39ceaf0085a4875192bb943b3e06b	hypothetical_protein
06a424855f037641e5068fb421063dac	cysteine_desulfurase_SufS_subfamily
06a468d989d624f3455c5904cce243a4	phenylalanyl-tRNA_synthetase_class_IIc
06a5d21a94f0369d4c3f0177029dbc94	putative_penicillin-binding_protein
06a75c6b8cc4b71a2ea3f69c2a8aadf8	cobalamin_vitamin_B12_biosynthesis_CbiG_protein
06a7a6aa25674a20ec838d7dfede0207	transcriptional_regulator_TetR_family
06a8c43d22aa2cbf99d59763679660ab	2Fe-2S_iron-sulfur_cluster_binding_domain-containing_protein
06a8d1abf09506e3c616ada742cd3852	IS66_family_element_orf2
06a9033fc80c6c1d873703c0d40f86d3	Aldehyde_Dehydrogenase
06aabd45dbefb1637c9765bc47c86291	enoyl-CoA_hydratase_-_3-hydroxyacyl-CoA_dehydrogenase
06ab907d4b0ad508fbf2e0c0ae8509e4	peptidylprolyl_isomerase
06ac83274c9c933719d3c38aeeaebadf	ABC_transporter_related
06add9f61ddfd7498d9235eaa281863e	putative_lipoprotein
06afdd3af3453086bcbe75382642b4e2	peptidase_S1_and_S6_chymotrypsin-Hap
06b2cdb160fc1b46bef417cc4459bd3c	cytochrome_P450
06b6aa261180a47c7ccdce486071c56b	CTP_synthetase
06b73256e7e53e260ac01971a2ec7a2a	hypothetical_protein
06b878d13bd212579487909a38a98d05	thiamine_pyrophosphate_TPP-binding_domain-containing_protein
06b91a52ed0d126bce2d951e215f9996	selenophosphate_synthetase
06b93130f46f47de9866c263def3fd43	NADH_dehydrogenase
06ba71f46620e1255aef046a23521e2e	hypothetical_protein
06bafda5a1a99b3104a396bd80a6bd21	Histone_deacetylase
06bb1038bcea993ee2d71375fa2d6eba	periplasmic_solute-binding_protein
06bc9b906e547a21c022e8c4360f8479	hypothetical_protein
06bcb3d51ea867615eeb3f87738041d1	tartrate_dehydrogenase
06bd562f4f09cf8612bde3f9e566067b	peroxidase-like_protein
06be107562ef8753c500444517c3cc27	ATPase_domain-containing_protein
06bf006e3b692bee2be49bd79668bb6a	Integral_membrane_protein_TerC
06c043a466444de13f939d419f3ccc9d	N-acetylmuramoyl-L-alanine_amidase
06c0cd5577f50a2adfe76c959ed2b715	NADPH_quinone_oxidoreductase_PIG3_family
06c0fb95c65887b363fb942109021b89	5-Nucleotidase_domain_protein
06c11c98be93a515a559003f1875ae64	GntR_family_transcriptional_regulator
06c162f4724eb1501915395a2090e8ed	hypothetical_protein
06c2d132cb95a9420962c64d2c9affbb	putative_monooxygenase
06c307fc1f95c5a6c61de1757e1a39c9	dehydrogenase
06c34cb451702e1b2860c2904bd13c39	putative_NAD-glutamate_dehydrogenase
06c53fc21942fe6a82c77261e0fa6e06	hypothetical_protein
06c67a5610d2ddb65ecfeeea8f154046	short-chain_dehydrogenase-reductase_SDR
06c6c76122f4d07472c48d6745645299	beta-galactosidase
06c7798ec74867e0f4d14a8aa6bd7dfa	molybdenum_cofactor_biosynthesis_protein_A
06c7c21069bfa316bcefcb043e6d7563	ribonuclease_Rne-Rng_family
06c904df08c3c75c3d1c565a177230d6	iron_permease_FTR1
06c928531987bf6a9a9d305191e97824	ABC_transporter_membrane_spanning_protein_oligopeptide
06cbc6027129e1c28d8d7caf0b0fff1d	putative_sodiumdicarboxylate_symporter
06cc458fb412d829642396ab11e21573	UvrD-REP_helicase
06cc459daa4e08092272f078fdbb1ae8	LSU_ribosomal_protein_L2P
06cd247222f05838b5ce7f21560e6f82	Dipeptide_transport_system_permease_protein_dppB
06cf8c7e33cf0cb7c40839e92b58b8e6	hypothetical_protein
06d0c2a046db86b93a4f2f0907122d4d	ornithine_carbamoyltransferase
06d1279eb4aef89b2a1981e626cb4f8f	NAD-dependent_DNA_ligase_LigA
06d20b60e64e782b070dd6a7d0a6581d	ribosomal_protein_S19
06d2de284359dfe0dbd5cc8c970a1f94	acyl-CoA_dehydrogenase
06d3cb8f96b28e0db8c22bf34b232f57	oxidoreductase_aldo-keto_reductase_family_protein
06d5de23e02570e0b30c956b189974e6	50s_ribosomal_protein_l7-l12
06d7efd834fc69225947eaebebafe016	von_Willebrand_factor_type_Acobalt_chelatase_pCobT_subunit
06d9cdd540c7302fa6703b54ce03bfb2	major_facilitator_transporter
06db39d7233b470648cd65baa47fce9e	transaldolase
06dbf6334630dae2dd2e8b6f5adb9165	Naringenin-chalcone_synthase
06dc140be3d2b6f14b71b29057531ebe	D-cysteine_desulfhydrase
06dc54987451f77af090d6b92c17fd97	oxidoreductase_fad-dependent
06ddd818cee1dc57735a56f73b3528cc	Proline_racemase
06e103d50742008d540a7a6780221b0a	putative_sugar_ABC_transporter_ATP-binding_protein
06e187e7bd987d802231c1c1dcbe892f	ABC_transporter
06e189d7b53769e9b3911c205bbbc465	putative_potassium_transporter
06e25afe90eb20495010306d7b17da60	secreted_protein
06e33163f490d06d2942ca6a3380552e	glycoside_hydrolase_family_76
06e5a46195130657c8fbee5d4b86c80c	hypothetical_protein
06e66eb6b599a85dc3787570384808b3	hypothetical_protein
06e6a83c09f6b667ed3e582e59b94e3a	tyrosyl-tRNA_synthetase
06e70fe3cbdd05ab6da8249d39917612	arginyl-tRNA_synthetase
06e7d6728f04a1cd46bfc36ce7b4a793	ABC-type_drug_export_system_membrane_protein
06e95351fc1eea761426ebd2b8908814	cellulase
06ea3c6271731e3ae53a30a8672e8323	dihydroxy-acid_dehydratase
06ea433888d90fa28e463c21ce14e548	hypothetical_protein
06eb0ecf31eab6260f736f29fdcb68ce	UDP-N-acetylglucosamine_diphosphorylase
06ebd0470d38b18681a72e901b3eeb87	L-24-diaminobutyrate_decarboxylase
06ec50253d2bcfbdef21632d9bfbcb89	probable_NADH-dependent_dehydrogenase
06eca32657d37afc72929f7995d8bcf4	ATP-dependent_helicase_HrpA
06ee312bbab04fbe048ea7715142f377	protein_of_unknown_function_DUF1501
06f0092dc3250f34eb26656c79dfe342	PhoH_family_protein
06f12fb72cf80f39255ac37b4d2b7358	decarboxylase_family_protein
06f26f83dc73d227c95ca388b1341d80	ABC_transporter_related_protein
06f29791b6dd4528ed9eb3bda3954376	polyphosphate_kinase_1
06f2f0f8b1e69eeeeffc3468eb5d719f	NADH_dehydrogenase_I_D_subunit
06f30e5658ffef3fe533d457021da490	hypothetical_protein
06f333f73b421ddc324677735940ab93	dihydrolipoamide_dehydrogenase
06f346e5210782497ab9de6e1443ae6d	hypothetical_protein
06f37d795e98d29ffabd5019a3d491ce	putative_transposase
06f441b29fc725c275b4cd8e49e2f271	DNA_gyrase_B_subunit
06f5a799689f9901a2848626773fed0f	putative_ubiquinone_biosynthesis_protein_UbiB
06f6249d3b181d5d1e5098660bc2a0f9	probable_nitrate-sulfonate-bicarbonate_ABC_transporter_substrate-binding_protein
06fa26a374278d6f3a4c39b49b4d8790	Shikimate_kinase_I_protein
06faadddd1feaf587a0be7b283d3859c	Integrase_catalytic_region
06fcb6dcbbfa54ff54a48e2384caf709	phosphatidylinositol_alpha-mannosyltransferase
06fcd491a659775f8b885df99efadc18	protein_of_unknown_function_DUF75
06fddc8faef5dd77ace1438ef767eb59	acyl-CoA_dehydrogenase_domain-containing_protein
06fef539ff497805e701435575f3d23d	oxidoreductase
06ff5e139a0f76b8ede7df81196fbae4	Na-H_antiporter
07011a1eeb7950017927b2900e3a1e30	hypothetical_protein
0702a18a165238b8df0a418846348676	succinyl-CoA_synthetase_alpha_chain
0707d45133e17ea567ba84d95440b418	acriflavin_resistance_protein
070c7fee56486b0d5168bd6e465d3032	hypothetical_protein
070d63109ce946a0bd04818326bb2dca	5-carboxymethyl-2-hydroxymuconate_Delta-isomerase
070e2c4e996dd998a253e5b1761b0e0a	hypothetical_protein
070f8ff2d7cc71e91a999504fb71a240	conserved_hypothetical_protein
07143cef4c34b1ec88ba887176ca07d5	phosphoribosylamine-glycine_ligase
0715644eb521f8df2c2d0fb8fd0193aa	hypothetical_protein
0716643b44c74a9fa19100c5983cffad	tyrosyl-tRNA_synthetase
071722f59c48291930129b9be5658b16	3-oxoacyl-acyl-carrier-protein_synthase
07189d751f0f3c2a1f43dcde0b3b3fb6	polynucleotide_phosphorylase-polyadenylase
07198bcfd8133df15c99fb4944d1dd4c	hypothetical_protein
071a5439b979e53b871dddcf8d4e1192	hypothetical_protein
071c189d42b1338da23667fb2a3eaed5	protoporphyrinogen_oxidase
071c3eeb8b4c0d68835958184152d164	enoyl-CoA_hydratase
071de32d2a25534c40ef8275aca405a0	putative_thioredoxin
0722ee45680d4a29df96adb32c484e9d	amino_acid_transpoprter_cationic_amino_acid_transporter_CAT_family
0722fa61cc57d2841d06ba260027af6f	amidase
07236429e9433feebac2d12cf3c7d7c5	inorganic_pyrophosphatase
07248f2b40875591a41c8613b3a1579d	transcriptional_regulator
0727114aa4e107b4620bb5bee473c62f	Pyridoxal-5-phosphate-dependent_enzyme_beta_subunit
07273db338271bcd610ae3ee705b4a1b	dihydrolipoamide_dehydrogenase
0728ae5cb3391604d9c4e4435c6a462a	excinuclease_ABC_A_subunit
072907bfcbcf864289ac841c2d9266f0	Phosphoglycerate_mutase
0729ffb4ae8a614b6c52021ed92663de	sesquiterpene_synthase_2
072ca9d4fa1f73c8bd6fee2f0ea52128	p-hydroxycinnamoyl_CoA_hydratase-lyase
072eeb5d1b702b55654316308efda922	3-phosphoshikimate_1-carboxyvinyltransferase
072ef3a94eb4d7cdaf291ab6b59590ba	hypothetical_protein
073120df6cad4d1e069a76d34ce9a612	3-phosphoshikimate_1-carboxyvinyltransferase
07322bfa1726e9bb88277cb13d12289b	signal_recognition_particle_subunit_FFH-SRP54_srp54
0732643eebe7eac1db56806720d91f0f	metallo-beta-lactamase_superfamily_protein
0733b920d4de2418ac75dedb5a6c09d1	protease
0734e8a195b8aa8f12dcc30f91704cf2	hypothetical_protein
0737b533d465593f31fb210fef152f52	glutamyl-tRNA_synthetase
0737e52e15bc285179ca70f8296c86b4	DNA_topoisomerase_IV_subunit_A
0737ebeed49537ceee7df6bf87189fff	sulphate_transport_system_permease_protein_1
0738b0fa806afd92d77edfe15bc2422e	translation_elongation_factor_Tu
0739e473b645142c1f4b47d8ff655401	glutamate_synthase_NADH-NADPH_small_subunit
073c369d01117ea18349c81bb061e7e7	hypothetical_protein
073ee16fc4b73cd1b18a7da9a3e6cba7	Hemerythrin_HHE_cation_binding_domain-containing_protein
073f0a1e64da65d39ddbc7f974e9c426	maleylacetate_reductase
073f49d9f0945bb17b0978e8e3c549b8	ABC_transporter_related-protein
073f9813c15a428be552c1f14eb662d1	molybdopterin_oxidoreductase
07425b89d9a5af1776b4e73a8e61abfd	fatty_acid_desaturase_type_2
0742900e0de83aa837a4ec2bcfe84eb6	putative_outer_membrane_cobalt-zinc-cadmium_resistance_protein_czcC_precursor
0745bc4656abd6852d17d353c67f5c49	protein_of_unknown_function_DUF839
07479f074be80d734cc5e4cdb3dfefd9	Redoxin_domain-containing_protein
0747c588d66ed17970bd25aa5caeb695	ABC_transporter_related-protein
07484ad5ef1f1fd7155fb71f98af9e73	oxidoreductase
074bdd76bfea1ac79b51ecb8b56a98cf	endoribonuclease_L-PSP
074d09e5c862b246b3faf3fedb665635	isopentenyl_pyrophosphate_isomerase
074da04f4571f2681deb795111c47c7e	BadM-Rrf2_family_transcriptional_regulator
074e724b3881a74a77afaf0b3b48d93a	diaminopimelate_decarboxylase
0751347514c2a19cff32f48af5ca97e9	hypothetical_protein
07520a055fd619fc0a57425b32a010cc	transposase_IS4_family_protein
07528a1f404e1ddd1cb09333ad2c9bf0	PAS-PAC_sensor_signal_transduction_histidine_kinase
0752d56a30324bc717345a875449f0d7	glyceraldehyde-3-phosphate_dehydrogenase
075328ee1483e596670112787b4aca71	hypothetical_protein
0753ec3834d31d27ffab7a8f0b55b178	carveol_dehydrogenase
0754431206ef6b37a56f59519072ee6d	TonB-like_protein
07548a2cbdcebb1441d5842feaf2907d	FAD_dependent_oxidoreductase
075829099f1c09a27124982f1066b365	L-carnitine_dehydratase-bile_acid-inducible_protein_F
07599e9d45bb1d8435198a628673052b	oxidoreductase_domain-containing_protein
075a467d6a5a294e2b0f100478fa503f	Extracellular_ligand-binding_receptor
075b304cefb65453a2c3907ca3f3a325	regulator_of_polyketide_synthase_expression
075bcdbc574d50856ba11b9903e3e681	putative_glycosyltransferase
075c1d5c088a79244f5508735bd84864	hypothetical_protein
075c2fef6e853fefd1682f032b82c544	mandelate_racemase-muconate_lactonizing_protein
0760fc3fadcf7f5543d0e3100c2480c5	maltooligosyl_trehalose_synthase
07643ef87a43b915a45241e154c47de6	dihydrodipicolinate_reductase
0765c7105136ee86164afde0d3ee512a	type_I_phosphodiesterase-nucleotide_pyrophosphatase
0768c66ff42e9a763950cc68898e5b74	thiamine_pyrophosphate_protein_TPP_binding_domain_protein
0768cb8d0be40fc01a1f7a726c2c12a3	hypothetical_protein
076912164e36232a25561300b6cc0035	hypothetical_protein
07699bc492780c2c85010cb531b097dd	NikQ_protein
076aed73d05b63df42de167da3cc79b2	CDP-diacylglycerol--serine_O-phosphatidyltransferase
076b56ab384aaffda9d2153c23ef3614	proton-translocating_NADH-quinone_oxidoreductase_chain_L
076c2b7499f0acf8e69725a62ac03fdf	6-phosphogluconate_dehydrogenase_NAD-binding
076e5a3249a03261ac4aa28960a411da	alpha-beta_superfamily_hydrolase
0770248ca327eb3897fd06fa03fc1186	putative_aldehyde_dehydrogenase
07729e7d2c75508e284c5b2731bba01f	valyl-tRNA_synthetase
07757f08d69434cfe34ca50c9d7b5a2e	DNA_topoisomerase_IV_subunit_B
07760cdc6d731622622670abae096bf8	putative_lipoprotein_transmembrane
07764f715699fd0fca0bd47d9a874be5	MraZ_protein
077b4f140881af32de49666ea301a35d	hypothetical_protein
07801ebcf98e87144d2ca3225c63a226	N-acetylmuramyl-L-alanine_amidase_negative_regulator_of_AmpC_AmpD
0780ca4bbf08f95c15ebf6eeffc64512	fumarate_hydratase_class_I
0780d8509b53d45dab605eb4133cd72e	hypothetical_protein
07819300739b5a37b7cf19eef8931ee6	heme-binding_protein
07819c89739f7b1d8344ffddb1dcb1f5	hypothetical_protein
078459884f0a3afcb22b648fa127c3e2	hypothetical_protein
0785494cdcdec6e4fac90ff52bf4cf4b	methylmalonic_acid_semialdehyde_dehydrogenase
078550866c1cb89f59e4cc869f9e5961	ASPIC-UnbV_domain-containing_protein
07864a301dc621ebdadaed793d30ed31	putative_type_II-IV_secretion_system_protein
0786be402cc51449edd2c7fae18c0812	acyl-CoA_synthetase
078708b01be94d22cef04da082ee12ac	ABC_transporter_related
07871e3fdee1ff217a9cc17c22fd6557	multidrug_resistance_protein_A
07876a13618615176c31675343f35ff5	hypothetical_protein
0789e19d4d457687cd229d002985c57a	hypothetical_protein
078a9a1cb9d79c3be7e4de569b2eae79	S-adenosylmethionine-dependent_methyltransferase_YraL_family
078dcd24d65d23aaa3efc9e9f28c4988	Lrp-AsnC_family_transcriptional_regulator
0791c22d3e657e999006e14211402631	hypothetical_protein
079241da9d591740c21c28d8f7b1e758	Bacterial_Peptidase_A24_N-terminal_domain_family
0792dd665e69b6cb5f45d949ab684f23	aldo-keto_reductase
0795b21649f5611a4056305ccaa7c2c4	Aldehyde_Dehydrogenase
07971f402a093fd5fc70276893ffe460	lactoylglutathione_lyase
07972ad15e1e7b36913da05523eb2208	mycocerosate_synthase_6-deoxyerythronolide-b_synthase
079732478b32451e89ddfe70ed950f68	enoyl-CoA_hydratase
0797fcf392c6e97d795042c93036952c	anion-transporting_ATPase
079833b8c43cdfbd67cb3f03d2d9cd51	DNA_polymerase_III_subunit_alpha
079a70808d699b3c10d25f1bab76c918	putative_transcriptional_regulator_AraC_family_protein
079a788535942b51ed6da55b0b49476a	heavy_metal_translocating_P-type_ATPase
079caef4218427aae15a57ea8205d0b2	hypothetical_protein
079ce67c95b7d7e1d9c369895a62ea69	NADH_dehydrogenase_subunit_NuoM
079e1ead829ff75244345dc22e42bac1	methylmalonyl-CoA_mutase
079f5be06948f7e968c61de6363db120	molybdenum_cofactor_synthesis_domain-containing_protein
07a34a66540a4f1b4e4f8188d767e03c	aminomethyltransferase
07a614131fe50dd9e06daca109d821c2	CoA-binding_domain-containing_protein
07a780694470ed0cdd21311e40919d08	aminoglycoside_phosphotransferase
07a7e90976f75dfc8474053796eab5fe	oxidoreductase_domain_protein
07aa0779759f5531eab82201f0b34a6f	NADP_transhydrogenase_AB-specific
07ac4b1fe1b4d63eba7d791bfc0293ac	DegT-DnrJ-EryC1-StrS_aminotransferase
07ac62ee8d303ec8d79802022b09735c	putative_hydrolase
07acbcdd7ed93f5344913d9d6b623310	dihydrodipicolinate_synthase
07ad321b31ff73661b41f1051307bd2c	dehydrogenases_with_different_specificities_related_to_short-chain
07aec0951297724cad84d835c4eee28f	Methylmalonyl-CoA_mutase
07aee12a7af0a11f2c79a1ec75b6af2d	putative_amidohydrolase
07af69bb85d6fa9b506222a9b26e0646	fatty_acid_desaturase
07b054a954ca99d249cbb4c8dacec394	ABC_transporter_substrate_binding_protein_sugar
07b10a65296fcc7cadb0e54ac7797cf5	hypothetical_protein
07b406d2ad753232cbc33d1e6ab48771	bacterioferritin
07b4f4eb9d16aeb587c3698aeabda757	cobalamin_synthesis_protein
07b51c0d8be4ebb8ac84a84c584ec9f7	phosphoesterase_DHHA1
07bb05a08656b4bb074f36eec90fae75	transcriptional_regulator_TetR_family_protein
07bb1465724331cf35cdd48ac7178728	restriction_endonuclease
07bb7eb6f091b7bf4348a00d269d70a0	phosphoribosylformylglycinamidine_cyclo-ligase
07bb95845e69270874fb0aec91cabd28	histidine_kinase
07bdf15c0162bc487c9f065f5ac54041	RNA_methyltransferase_TrmH_family_group_3
07befd5e0d9982e3d1cf55a526d3c021	NUDIX_hydrolase
07bf3a3ffd8595d079f884f84f2bb397	protein_of_unknown_function_DUF21
07c2241e0eec38d2695b0a1935ca8566	regulatory_protein
07c4ab46328e68c5dcb1720a84353774	crotonyl-CoA_reductase
07c5b11ba967509c7f5c66ec1ffbd234	hypothetical_protein
07c616eae431e53205a80ad945020214	cysteinyl-tRNA_synthetase
07c7d67e239947164ccdb5275d862382	putative_CDP-tyvelose-2-epimerase_protein
07c8872e76d8826d0c60ab08fa906fce	carbomycin_resistance_ATPase
07c92f5689a890e4ae5c8221b202bc20	Short-chain_dehydrogenase-reductase_SDR
07ca58fa62c1da582f384633e6107f2d	hypothetical_protein
07cac1c3f88665068f49f481ceff735a	ISSfl3_orfC
07cb571a3c10d5a9a5022b0454fbd014	ATP-binding_protein
07cda47cbf74dab35b579e6e5f419267	4-hydroxyphenylpyruvate_dioxygenase
07cf28542f13c2c2f7112251df276b03	putative_mandelate_racemase-muconate_lactonizing_family_protein
07d02e3c66044b1d043fdffa7a850767	glucose-6-phosphate_1-dehydrogenase
07d45cd9fc14a91b2bdf1c330fb0a1d6	cobalamin_B12-bindingRadical_SAM
07d4a76243816abee06b0957a2e1390d	penicillin-binding_protein
07d51dc2d6ea91371498951d38ab8d6c	flavoprotein_reductase
07d533a749f85b42703b3c0e291a28d7	ABC_transporter-like_protein
07d561f239ec66feed7471637cc75f02	RND_superfamily_protein
07d6e69bbfd8cde0dba2632d50cffee7	dioxygenase
07d889ef109ebdc0e61bce4fd8a682d9	trigger_factor
07d906434219deb476f669b7fece68e6	fatty_acid_synthase
07dca93ac3b528d8a1766caabf275597	Hsp33-like_chaperonin
07dd5cd25a5ceeec7e536c238369f724	putative_sodiumdicarboxylate_symporter
07df08fee7e755959e11e259208d14df	ATP-dependent_Clp_protease_proteolytic_subunit_ClpP
07e145d02660d3957022713c8d0f279e	putative_RNA_polymerase_sigma-24_subunit_ECF_subfamily
07e209d35b938ccff35f6d891c8b25f0	phenazine_biosynthesis_protein_PhzF_family
07e4c722be9b8282062d9a9df8a92bb0	glyoxalase-bleomycin_resistance_protein-dioxygenase
07e6794777a5cbca00d8513456b7125d	PadR-like_family_transcriptional_regulator
07e7564683363c09e45ff5dd1b4cf0d6	GTP-binding_protein
07e796d5bea13674c25b487ccde2161a	Holliday_junction_DNA_helicase_RuvB
07e862a48f0285258a49bfc7ffb6ce84	hypothetical_protein
07ea0058a8a886bab4b1523f67bd54bb	asparaginase-glutaminase
07ea1acf1157a89eae32de27a84b1167	hypothetical_protein
07ea94a9088f01b95dcc4bde02aa0862	5-methyltetrahydropteroyltriglutamate-homocystei_neS-methyltransferase
07eb096e0594dd813d5e9d0ac221ccf7	WD-40_repeat
07eb0dae8346e64e826f3ff1d5fc3c62	lipoate-protein_ligase_B
07ed25dea95099cec5d16014e19879d3	hypothetical_protein
07ed31334375059fc0bcec6b64ec93e3	hypothetical_protein
07edea845bce8d75f42f67cd7895abf4	ATP-dependent_DNA_helicase_PcrA
07ee18a4c14723d9189a75cd989e7050	hypothetical_protein
07f11ecc207116e7422c5b5ccc306f04	proton-translocating_NADH-quinone_oxidoreductase_chain_L
07f462c8c2f7311cddda44fda60eea48	L-asparagine_permease_AnsP
07f5adcfcd1c0fe2cb763fb53f6ed008	hypothetical_protein
07f65948f47385573f1e3006b2991881	ABC_transporter_nucleotide_binding-ATPase_protein
07f6dafb99a1d22a90b8f1b23fd57415	hypothetical_protein
07f6f74291a94040a85780b5d5f23515	hypothetical_protein
07f739b5d4d550ccc6ddc5fb06701f9b	ABC_efflux_pump_inner_membrane_subunit
07f81322fca579eb3f8c12211a184a63	amidohydrolase
07f856201bb45778e55db499f294cd09	DNA_topoisomerase_IV_subunit_B
07f919586661649af4764c1cdf9ca72b	putative_aminopeptidase
07f9297eabbfe7378fe85579aea2f7c8	N-acetyl-mannosamine_transferase
07fc3ee8fe5b4cb3f9ec934deebbe348	oxidoreductase
07fd66fd000499c8d9a9b1135f51d8ee	glycerol_kinase
07fe61b0194b9138cdd252580f1677e3	putative_periplasmic_binding_abc_transporter_protein
08003516138869b49a51f43fb8f0f14a	formate--tetrahydrofolate_ligase
0804c98bc40d55b3f74c50a9f488f234	Mandelate_racemase-muconate_lactonizing_protein
080797cca81a05a759f9b39df4ce6177	NADP_transhydrogenase_subunit_BETA
0809b64eafe35de74d9e743b2ce9557d	homospermidine_synthase
080ae75860c59435f7874f3ba444344c	sugar_ABC_transporter_permease_protein_putative
080b0264cb3cc089faf1dfb711247b3d	Ku_protein
080d22e10f8dbb463f3b73fe58794fb9	single-stranded_DNA-binding_protein
080dc58743efbb2ca09f6d9797d1c015	alpha-beta_hydrolase
080f4d7de6618f96d8c78c541de12165	bifunctional_phosphoribosylaminoimidazolecarboxamide_formyltransferase-IMP_cyclohydrolase
0810f30c130455d164a433858cf9e1a9	MmgE-PrpD_family_protein
0811e1969333a2b6131889a3973770fb	beta_alanine--pyruvate_transaminase
081239dccb248d5fa5192383b6fc5f83	hypothetical_protein
081239f8aeca128e544d4877f86dcda7	l-sorbosone_dehydrogenase
081323936ee8762ae0cfd23d947aa4e3	ABC_transporter_substrate_binding_protei
0818d5f89c754ce04ca6fdc742fcd63b	histidine_kinase
0819775c8160c80197f59365bcdd9ce3	sporulation_transcription_factor
081b5d083e0b83536a6efd167592ee62	aspartate_aminotransferase
081d36159544fbae48ca7a8a40d95436	acyltransferase_domain_protein
081de7100ff26483259a42fa8d1d59a8	phosphotransferase_system_enzyme_I
0820f7eb9626fe157e58a363a359f77e	lipoate-protein_ligase_B
08213da4f34310301e55a634d1c5a508	secreted_arabinosidase
0821ab95bb70f04aba88c37305912313	thiamine-pyrophosphate-binding_oxidoreductase_subunit_alpha
082585e243936ea35c2038dea05feee5	MATE_efflux_family_protein
0826c79833575bdd4750cf3b3ee96b38	D-alanine--D-alanine_ligase
08270b2045fb2c62723774542d325599	GMP_synthase_large_subunit
08296401ff0180e7bd2dc1285784b435	oligopeptide_ABC_transporter_ATP-binding_protein
082ad1df7bbcfcf1979599bf984ab85a	ketol-acid_reductoisomerase
082c3ccb0e170e0806ac4e4f61aa87bf	Inorganic_diphosphatase
082c8850120ff2e214310f12063c8fe1	Predicted_CDP-4-keto-6-deoxy-D-glucose-3-dehydrase
082e5e89347a31c0f25103d3a0b9d65f	sensor_histidine_kinase
082f62506ac989e5697d35b27ee419af	DNA-directed_DNA_polymerase
08302a546e06b0db9b7ff90defff1657	AraC_family_transcriptional_regulator
0830ca5c830b84b2e716d5818e8aadc8	glycoside_hydrolase_family_43
0831327bed1f412158ccd0f7f76ee0e6	ribonuclease_HII
08315b2e00e93171bc154ef7ad9e0504	hypothetical_protein
0832cceb663088c3c79673ef1973aa70	YCII-related_protein
0833b4e4044f6549d17bb4717694005e	MaoC_domain-containing_protein_dehydratase
0833d7fff0053454447893aa42a4306f	undecaprenyl_pyrophosphate_synthetase
0835757a3134df829e8ba0200063e197	F0F1_ATP_synthase_subunit_beta
083795e25a691a5b32dd1f3b4a434d34	transcriptional_regulator_DeoR_family
08399f8c6c28667bbcd18af79ec06742	alpha-amylase
083b97e8b74ad4e4109df5dcdc89fc1e	carbonate_dehydratase
083c0bf312ef52e4b1c358a4970b54d5	peptidase_M50
083e6c3bf82239855f81fdd3021e6a58	heme_exporter_protein_CcmC
083eddb5e701a781d127cc311434d1d1	hypothetical_protein
083fcec2cc5c97b598e2c512c9a34bc9	Beta-ketoacyl_synthase
083ffcccea4d51a72e8ed713ef41dfc0	peptide_chain_release_factor_1
0841b134a842521fa773a6e565ad0a64	hypothetical_protein
084390c5e3f92b457cad13b0a5fc7d39	amidophosphoribosyltransferase
084499cc6c80f80802abe47b8395abe0	AMP-dependent_synthetase_and_ligase
084720463766baa59e0a8410ccdf3499	hypothetical_protein
08499ea3c24f6c0d961338115508d404	periplasmic_beta-glucosidase
084ac96f36faf8f455ccec89cb56f166	efflux_ABC_transporter_macrolide_exporter_MacB_family_permease_protein
084ba01189834dbd8ccb77f2d64b04df	methyltransferase
084c75e828c385850f37e5f6dda29493	alkaline_phosphatase
084d44c8d116d76fbf97cee3a90963ea	50S_ribosomal_protein_L24
084ddbf0dac245bfe117c3418d9bcb59	histidine_triad_HIT_protein
084dde173597071c5ffa91843b4c8526	extracellular_ligand-binding_receptor
084e9e83573bc2fe8f2a053a96609bb8	cyclic_beta-12-glucan_ABC_transporter
084f1ab600c9528426735e79eeddbc31	lipoprotein_transporter_ATP-binding_subunit
0851147354a30ed44981e49ce64987b6	chaperone_protein_DnaK
08515ea2e7c1fbd8371bd2ab76a36838	acetyl-CoA_acetyltransferase
08518bb59167c80fc9ab750a7db08d4c	DegT-DnrJ-EryC1-StrS_aminotransferase
08533193f45209a4c39a8dc156360e73	anthranilate_dioxygenase_reductase
0855c44201b667c7995bf29eb8b6e2d6	carbohydrate_kinase_YjeF_related_protein
0857093eac89caafa7ff90bfe9267659	acyl-CoA_synthetase
085719b09a1d2cbc2fb7b6e6689c9c0c	Xylose_isomerase_domain_protein_TIM_barrel
0859ab07798ef0ef07791d5597161b5f	hypothetical_protein
0859dfe53b3d374c8a556ed4b228b0ce	band_7_protein
085b056532086efa1e6e1b2f44f7d3df	recA_protein
085c1192cb2141223cfb6f1d724f284a	possible_thiol_oxidoreductase
085c495223c9fc9212be39c91ad353eb	queuine_tRNA-ribosyltransferase
085f052f73053c859e0c05555b2669fb	copper-resistance_protein_CopA_family_protein
08613d984c80fab0ebf20603808df00f	alanine_dehydrogenase_protein
08644371e78bc6bbcc9ac78dc5f46486	putative_suppressor
0864c1af1ffaebf660afec3fd796e0b8	putative_ABC_transporter_periplasmic_binding_protein
086506b2d735000ea382dd0e335d5ef5	acetate-CoA_ligase
08653ffc470acfc6272727f364d77d8d	2-dehydropantoate_2-reductase
0865f7adca5e657a0526208aa90523e2	arsenic-transport_integral_membrane_protein_ArsB1
08664aa20be105598708045e4b013483	seryl-tRNA_synthetase
086747dd23757a6703a522cfa3add16c	heat_shock_protein_HtpX
08685ef5859c0e5d28c7b8038754acd5	endoribonuclease_L-PSP
08692f12a065d46efb91f90e7a4862f5	transmembrane_efflux_protein
0869312f8476cdbbe4981d80a9e653fd	binding-protein-dependent_transport_systems_inner_membrane_component
086a642aee132946932666910312fd27	sulfatase
086da887cf634a9841a151a64aada7c0	conserved_hypothetical_protein
086fa4de948c945602c4aad75a707b22	hypothetical_protein
086fccf57d9820eac879917cfb05cd45	transcription_factor_WhiB
087047d3b0dde0e46a3bbb8b0817892d	serine-threonine_protein_kinase
087091d6fd2bd980e29ad70c2f01a229	aldo-keto_reductase
0870f52a27d686815f26a4e543988d04	ABC_transporter-like_protein
087203ae9a903f80f349fd29b53f7822	lysyl-tRNA_synthetase
0872bf821627ace9ffbd441201f386d6	beta-lactamase_family_protein
08763feb90f2d7fdb2a320b9488060e3	lipase
08767992ab293a726c0c6db2d400ba1e	luciferase-like_protein
0877415c17e4b8f2e6a165b33fb9fb7b	glycogen_debranching_enzyme
08776d37f7ad419e446fd517ecf62b0f	oxidoreductase_domain_protein
0878bdfd0168df78a125b12e2a3024f3	DNA_repair_protein_RadC
0879a9925e4cc46bc6e2fd20424d0ae1	phytanoyl-CoA_dioxygenase
087b10a48d62b5a5ed2f30a901e7e580	alpha_amylase_catalytic_region
087ee7e79d056cbe27c925fb3aa35102	Rieske_2Fe-2S_domain_protein
088066867a582d2a270761071caeba52	virulence_factor_Mce_family_protein
088192735b7be02e02a9759b4f9a9765	succinyl-CoA_synthetase_alpha_subunit
0881fa83aaeab8c5c6c810f47f0a6157	glucose-6-phosphate_isomerase
088207517ccb115e5ee78fc5ca1420e6	sigma-54_dependent_trancsriptional_regulator
0882a2dcb3d5148608d53a8570198823	NADH-quinone_oxidoreductase_F_subunit
0883ff2ca531541ea252859383d308be	proline_iminopeptidase
088467ae1358031e75fb8ab41dcfdc5a	glutamine_amidotransferase_of_anthranilate_synthase
0884e943ffbdaf53ed4f461ea93f0eff	diacylglycerol_kinase_catalytic_subunit
08879fa30c166eeb4343051aac0e353d	putative_zinc_binding_dehydrogenase
0887da69ba9e39612bdd8f9dd5e2360b	hypothetical_protein
08887969c00dda3090bed37ef51dfd55	hypothetical_protein
088962d2b9d6015c47792e975c022dd6	type_IV_pilus_assembly_PilZ
088e1fb18ab81357081369c57035b7b5	oligopeptide-dipeptide_ABC_transporter_ATPase_subunit
088ec15dbd00c575854c2e2afa80242a	fused_ATPase_and_permease_components_of_ABC-type_multidrug_transport_system
0891c08f06ba1a29042249003fc6cba2	hydrogenase_assembly_chaperone_hypC-hupF
089222f556b120043e15d2a882fcdd1f	3-keto-5-aminohexanoate_cleavage_enzyme
0893d462f2647bab6df012c2c059e854	hypothetical_protein
0895911f95d7b6b8a4bdf63816a45098	NB-ARC_domain_protein
0895b35bb07c4659dfbdce5b9dd8d68d	DL-methionine_transporter_ATP-binding_subunit
089967d4e07126bc4592cfa7b7ab7604	translation_initiation_factor_IF-2
089a146a4e37d7d31908bcbfdea631d6	protoheme_IX_farnesyltransferase
089aa5a4f4672ebc80bf4d7e9805340d	SCP-like_extracellular
089b881bfda5e694874eccfff491ce06	sulfate_adenylyltransferase_subunit_2
089bf76cbbdce4bb5a078c7076841160	SEC-C_motif_domain_protein
089c8ab869a03b85adb1c7a24f1c17bd	dihydrolipoamide_acetyltransferase
089cb7ee94fb8364a511ec7cf4f5fc52	ABC_transport_system_permease_protein
089d0d5ed7925b04af887418b7ad20ae	transporter_hydrophobe-amphiphile_efflux-1_HAE1_family
089db59375f6420c6fb6362764527c54	Glutathione_import_ATP-binding_protein_gsiA
08a0a5cb915df329ab951bde51ecc812	hypothetical_protein
08a0db5ac8e5760728449f36e63d31a1	DNA_polymerase_III_subunits_gamma_and_tau
08a15fb1d1efd516c65dfb38c45e14d5	binding-protein-dependent_transport_systems_inner_membrane_component
08a21fc48f503367460033f825e80b06	urocanate_hydratase
08a46f4cfd761a4366e864d6e2eca52c	hypothetical_protein
08a5e95af43a8ec34eaeb0259bfce3c3	beta-lactamase
08a67e8a92e4f7d50703a57ffc8e1b3a	hypothetical_protein
08a6dab7b5d4dac5c7510d33f2345d76	integral_membrane_export_protein
08a712d468d79f8ff30ee7ecd3e2c144	sigma-70_family_RNA_polymerase
08aa21585f6db50845b031e5df5fb3b6	ABC-1_domain_protein
08aa4b32756467d59374688866b82697	conserved_hypothetical_protein
08aaa90e551c52431fca88afaa4f08a7	acyl-CoA_dehydrogenase_domain_protein
08aabf20e2bbc8286227de1a7907a19e	cytochrome_bd_ubiquinol_oxidase_subunit_I
08acb06997b4e8d550a0d6a542ec0791	Holliday_junction_DNA_helicase_RuvA
08ad04ce1d15d788d6aa335012b8832a	binding-protein-dependent_transport_system_inner_membrane_component_family_protein_40
08b040eecc4b1c700fc18d9b1f77759a	putative_signal_peptide
08b14b0067e946da23f0f6409d5e774c	hypothetical_protein
08b2464015a7ee123eedbc99d7c39c8e	carbon_storage_regulator
08b3a7c1934099f74450e630eb1e318b	fumarate_hydratase_class_I_anaerobic_Fumarase
08b7c84eeba77130660436c2f7447c7c	transketolase
08b8b6a9f139b06b74d605864d7a9a84	putative_glucosyl-3-phosphoglycerate_synthase
08b9bef563ddf39737dbe7efaa08bcbe	phenylalanyl-tRNA_synthetase_subunit_beta
08ba702e4a8647daf6b6650ae638ec53	DNA_gyrase_subunit_A
08bd968035d943bf04a56515d0b96455	6-phosphogluconate_dehydrogenase
08c1819b6b5b2492c4116673e41dee48	hypothetical_protein
08c235c71bcfa0d15e0038107b4824ee	3-oxoacyl-acyl_carrier_protein_synthase_II
08c34807ac82f44d2e9905b2643bee48	membrane-flanked_domain_protein
08c34896f371b73fa7fd1f29053b37e1	cysteine_synthase
08c393928b3f627a21cfeb0f5cb11d5f	ionic_transporter_integral_membrane_protein
08c606288a3b9deb233e263cea157463	aldo-keto_reductase
08c773d534b1b48d6453528c33d5c44a	glutathione-dependent_aldehyde_dehydrogenase
08c99d257b86753477d379e038c4c415	hypothetical_protein
08ca353986ff42cd324ed4c6fc68f487	DNA-directed_RNA_polymerase_subunit_beta
08cada53c4a8951e44a2939cd15d5ca0	peptidase_U62_modulator_of_DNA_gyrase
08cdbce94755a9cd06783397ed17faee	nitrogen_metabolism_transcriptional_regulator_NtrC_Fis_Family
08ce98d7c472c226b9f6163d63718549	DAACS_family_dicarboxylate-amino_acidcation_symporter
08cea7d04bf0446d16a54ec1a67446ef	ATP_phosphoribosyltransferase
08cf462393a3cdfc63b9c116e5bc8253	tRNA-specific_2-thiouridylase_MnmA
08d01e4ede8af2b8c9223c4a30d6e2e5	alpha-12-mannosidase
08d0800e7287f9e98d30bc10d140ec6e	GDP-mannose_46-dehydratase
08d0aa8398bfd12af7d2d765388c2e27	acyl-CoA_dehydrogenase_domain-containing_protein
08d0ee0d0dd895443a4b2b07622815bd	TPR_repeat-containing_protein
08dacb1909650ba16f85aa3301b31b8e	hypothetical_protein
08dbba3b3e65722b7ccd0bcf3d98f45a	acyl-CoA_dehydrogenase_domain-containing_protein
08de295a5a47f5c8ad271805d5037e56	AbgT_putative_transporter
08df96717aa1b5b1286211bdd8d81ee6	putative_ABC_transporter_ATP-binding_protein
08dfab3202dd4ecbfdad5df21362d8c0	L-allo-threonine_aldolase
08e09eab97b5e93eddd38980425dfaf8	2Fe-2S-binding_domain-containing_protein
08e14792748697e3ed788372239d2a61	stationary_phase_survival_protein_SurE
08e19866418cbfa155edbe85c3ac3d11	MFS_transporter_multidrug_efflux_transporter
08e2f142b5efbd70cf2d6c806badb794	3-hydroxybutyrate_dehydrogenase
08e49f6deeb32a2310317a645291ca42	octaprenyl-diphosphate_synthase
08e5f6c4ca1583b23054a7f2596ca127	transcriptional_regulator
08e7f3a941d528eb2c9d9046687a2182	putative_dioxygenase
08e87ca09d8d9c74ec70457f31d17ceb	UDP-glucose_4-epimerase_GalE5
08e8c57389bec7369e6ba265db92ee83	pyridoxamine_5-phosphate_oxidase
08e8f41723d7022fed991fc9ad74acca	transferase
08ee915eee981020a54b8b6492a1d9ee	Spermidine-putrescine_ABC_transporter_ATPase_subunit
08efd13304df689ca35f9888cc425402	phosphotransferase_enzyme_family_protein
08f0d4d99c56c43bb6aff39158d032f3	putative_alpha-isopropylmalate-homocitrate_synthase_family_transferase
08f1d8e2e23fa43217d142fbceb19d8b	ABC_transporter_related_protein
08f217748307b7812a27d9258366958c	mandelate_racemase-muconate_lactonizing_enzyme
08f2c9c154ccfbd2ce70235dda54b620	acetyl-CoA_acetyltransferase
08f3f0a00e44fcec6cc9338627c4b4de	polyamine_ABC_transporter_permease_protein
08f6437e60e8d144938efe42fe8c5d84	hypothetical_protein
08f64ab5109ee88214530ecd6b064eb0	putative_signal_peptide
08f728f6efd8d0dc9c2c9d1cdf6ff382	hypothetical_protein
08f95fd0a3dc716eb0126154e94dc663	FG-GAP_repeat_protein
08f9c4510a2aa1666ce27b69c1fcc82c	cytochrome_c_oxidase_subunit_I
08fa98de751b32b01a956cc2e6c38480	methyltransferase_type_11
08fb01b1656edd5fe2dd66803be6a44c	aminopeptidase_N
08fd3abb4e327a348c96c8e511ad0434	putative_acetyl-propionyl-CoA_carboxylase_beta_chain
08fe89ba1de66ef6d2572b3f37360d80	KHG-KDPG_aldolase
08ff7988848246f455f9dba139bd67c9	glutamine_synthetase_type_I
0900381f01038be0d83b7dedd5e66de5	hypothetical_protein
0900e9db5cbdb59c664021af0316c73e	hypothetical_protein
090185696b9ddc8a9f3fb64e4f7c7bce	molecular_chaperone-like_protein
0905123e22a1581f369e974df5109eac	putative_integral_membrane_efflux_protein
090540fbdb51394062983e331974f354	ATP-dependent_metalloprotease_FtsH
090a39226963195dda582b5b046f31dc	binding-protein-dependent_transport_systems_inner_membrane_component
090b3d22e96ebdd05d3e1c7fdb8ca16e	UDP-glucose-GDP-mannose_dehydrogenase
090d1dbcb99b33c1028ae6718c01148f	imidazolonepropionase
090e6823bf4cc1ef25f86a883ab582a5	dihydrodipicolinate_synthase_subfamily_protein
091003eff2f060945e772583b69239a7	FAD-dependent_pyridine_nucleotide-disulphide_oxidoreductase
0911cc39910949144f7810f1dbaaf4fa	multidrug_transport_protein_acriflavin_resistance_protein_F_RND_family
091355813beaf9aa5474193bb32599f5	ubiquinone-menaquinone_biosynthesis_methyltransferase
0913a0c8b3638545c6e4bfdec1c87483	ATP-dependent_Clp_protease_adaptor_protein_ClpS_modulator_of_ClpA_substrate_specificity
09144b7ed4e042c7d4e28fd760c37aa2	Methyltransferase_type_12
09189078519eb70c8ebb59c2e31bc7c6	isonitrile_hydratase_ThiJ-PfpI_family_protein
0918ffcad31de81ec23868448ce73784	alpha-2-macroglobulin-like_protein
09191f7c6212008c7c6f7ef0c7a4051e	response_regulator_receiver_modulated_serine_phosphatase
091b9d8327dd405ce76542c6397ac547	putative_short-chain_dehydrogenase
091cb20801a50b7b5e135880be25b19b	TetR_family_transcriptional_regulator
091f6dbe7055d8c4037e878e1618b432	putative_ferrodoxin_oxidoreductase_alpha_subunit
09203b9147d15885db17bd87dc088ecf	PDZ-DHR-GLGF_domain-containing_protein
0920c50333e429c82d239cd0795b2819	N-acetylglucosamine-6-phosphate_deacetylase
0922302d12dd12b163c8963cdbe80f6d	peptide-methionine-S-oxide_reductase
09230f7efc35ae58981208f5c213e026	DNA-directed_RNA_polymerase_beta_subunit
092457be503ae1ebc9070bdbf6688a6d	phosphoserine_aminotransferase
0925fd808f27e0e58826fe2e1e831947	oxoglutarate_dehydrogenase_succinyl-transferring_E1_component
0927808bbab07d9e4ebd11d2ac65aa35	hypothetical_protein
0929c5957c3af89ba1573b23ccbadd52	30S_ribosomal_protein_S11
092bacb9722b26a0f8aa18017c90d164	recombination_protein_recR
092cf8078686adf1591959fffc523bf5	Ppx-GppA_phosphatase
093031f907f46f55d660d366f59d2404	NUDIX_hydrolase
093204b3bd5d0b33b4d9b3d4b6f6f263	DMT_family_permease
093277a56a16fcc6664b4ca28380aa30	alpha-2-macroglobulin-like
0932b39b8b0db7a6d90495d4b6823051	acyl-CoA_dehydrogenase
093319cdca10aba4623c685a28e3e771	hypothetical_protein
093441a11f6d187513d6ff4279a95175	glycosyl_transferase_group_1
0936f0d037959bdfc8e645ba799a74f7	thiamine_biosynthesis_protein_ThiC
0937cb219ae0e2a3856483e2ce4e803c	DNA_gyrase_subunit_B
093b4b10aeef41682617da1eddf856ca	glycoside_hydrolase_15-related
093b9a4f1a490e6948fa7576b94128f4	acetyl-CoA_acetyltransferase
093bdd94e8a6040736a4c2cf94caa3c3	two_component_transcriptional_regulator_winged_helix_family
093cc2d00e58464af34d90fc1c146de2	dihydrolipoamide_succinyltransferase
093df5d89d07cb14de01bccb07659e8a	OsmC_family_protein
093e899812faf885e52100fc1c70b666	hypothetical_protein
093ed7af121ffd7cbd15a24d645cf861	Endonuclease-exonuclease-phosphatase
093fbd5044a6654b542062d3fb9dc35b	urea-short-chain_amide_ABC_transporter_periplasmic_urea-short-chain_amide-binding_protein
093fda87dab814436b52f1c0829e4efc	Peptidase_M1_membrane_alanine_aminopeptidase
093ff045142a8b160c045af86e73b233	putative_signal_peptide
094127724a10ac099527bf69decf38b5	aspartate_carbamoyltransferase
094401de0e94ff22bcce71eac3e69f15	sensor_histidine_kinase
09490170f819c7a982e547640abb64e6	ECF_subfamily_RNA_polymerase_sigma_factor
09491177bad43bfea5678978c4c2673c	RNA_polymerase_sigma_factor_RpoD
09495c4614e142fb5f9315b5401e042e	ribosomal_protein_S2
0949cef5d6886d152f79bb7a97eb5761	30S_ribosomal_protein_S7
094ad6ac8b2ea6456c5e2b37ff8cd7f7	GTP-binding_protein_LepA
094afc74bf6e05ca8df4581981b52668	oxidoreductase
094b59b081b7af6cdc2cfa93966dedb4	L-threonine_3-dehydrogenase
094c18e62d8e664bb0ad48ec9c321241	peptidase_M48_Ste24p
094d335583f37e3660c263db5ee9000c	hypothetical_protein
09510ef5c1d94abc591470e86a94903a	hypothetical_protein
0953e1051197d63b7157223e8ace2a20	phosphoribosyl_pyrophosphate_synthetase
0956201ea775c87676d330073e6871c2	hypothetical_protein
0956387e4d665ad492347494f15e37e5	Amidase
095674057cc0060b0c4319201d3586bd	hydrophobe-amphiphile_efflux-1_HAE1_family_transporter
0956ba9dcf83cbab0eaa688d70336b2e	ErfK-YbiS-YcfS-YnhG_family_protein
0957a80c648cab702ea9a53e1f62036d	response_regulator_receiver_protein
09586d0b6a64036323ad998462d86687	pyruvate_dehydrogenase_subunit_E1
095989598f5fd0b976a2c5c5fa863562	putative_ABC_transporter_ATP-binding_protein
095a2ec139e8500c2fcd7fb0c563a93d	nitrate_ABC_transporter_inner_membrane_subunit
095b7d74ad1ea2c047d6bcfb9254dd0a	hypothetical_protein
095bc2bcbcbe53c4d74f971def7f010c	luciferase_family_oxidoreductase_group_1
095d4b784e9dbb8068bcbbf2bc5e451e	polyamine_ABC_transporter_ATP-binding_protein
095ebe36c2c746d6e17ab513abb3ef0d	hypothetical_protein
095f0a3fded2099c06f95d42fe63125d	D-alanine-D-alanine_ligase
095f4d44e353031549dd79338441e2d9	cysteine_desulfurase
09605eff224d13f6caacbfdb3c67cdea	undecaprenyl_pyrophosphate_synthase
09610f899e48fad060d1d58b63d4ac1f	enoyl-CoA_hydratase
0961389e609b1cf24ca86f9e85688dde	AsnC_family_transcriptional_regulator
096359210baab686e6e2a03f05010d4b	alpha-beta_hydrolase_fold
09642a2c86049ded748b765817447c1d	transposase_IS3-IS911_family_protein
096457a262155e21b04c73c8e845933a	argininosuccinate_lyase
096472183fd2e70cffc07b680d0b23bb	drug_resistance_efflux_protein
09650db778e89d05ee2efd521e2ecec9	LysR_family_transcriptional_regulator
09667cc9b44105410a9933bc6acae34c	ribonucleotide-diphosphate_reductase_subunit_alpha
096857a6e0551c0aeeb86f2ba59fd614	formyl-coenzyme_A_transferase_NADP-binding
0968dc86a569bca72732953523d541b4	cytochrome_P450
0969a9f5106be9e284bd29262856d8e4	phosphate_regulon_sensor_kinase_PhoR
0969e01663f7b8727b239da696d82e7d	translation_elongation_factor_Tu
096a8aaa61739ddcbabbc68d4d0db9af	esterase
096ba132a5f7ec64d18f311fac0eae98	2-oxoglutarate_dehydrogenase_E1_component
096e6e55d07a95c594a5973c2c3e58a9	hypothetical_protein
0971c70a096dd8a136d6a689d4a2ab07	activator_of_hsp90_atpase_1_family_protein
0971e5a46485e0fe0010ff02a02fe1b4	GMP_synthase_glutamine-hydrolyzing
0972026b52f0912a47df09a2f40eafe3	serine-threonine_protein_kinase
0972729b2b822360440e63d4b019a40b	type_II_secretion_system_protein
09753fd82294007b5aef0616de46e391	thiamine-phosphate_pyrophosphorylase
09754582abe88d393fb6bdf0c0ffb1a2	type_I_phosphodiesterase-nucleotide_pyrophosphatase
097705b5edb39d328fcd4dd25681c088	biotin-acetyl-CoA-carboxylase_ligase
097751b183c0f67b15864f42b6b31ebf	maltose_ABC_transporter_permease-like_protein
097770d879a4752610d4e478eab569e7	ssDNA-binding_protein_controls_activity_of_RecBCD_nuclease
0977f09e27f1a8ff44361ebf19c32295	putative_oxidoreductase_protein
0979113ed1db0581f7591ede519c3f42	histone-like_DNA-binding_protein
097939e6864d66318e935dde23c113d6	phosphoribosylaminoimidazole-succinocarboxamide_synthase
09796670671f8f56ceb243908cc8e8b6	preprotein_translocase_secY_subunit
097a9bbe54b80fe8e035f2ce2cac21ae	DNA_gyrase_subunit_A
097b6f02494bac114af7aabab2227584	ATP-dependent_AMP-binding_family_protein
097ced5c70d10f9c569039de9e854b07	L-serine_dehydratase
097f29c12b6c1d19efbb7fb2a688fad1	DEAD-DEAH_box_helicase-like
098118b5b85284719521eb77681a1982	Fmu_Sun_domain-containing_protein
0985d8d89f1e869a202258b507422025	long-chain-acyl-CoA_dehydrogenase
09892d314468f81d93a08b6cf0f566e1	N-carbamoylputrescine_amidase
0989ff5b5bf3270ab7e4d4990e3de31b	F5-8_type_C_domain-containing_protein
098a5afccf2e2fec2479b7d1b77dc8cf	pyridoxamine_5-phosphate_oxidase-like_FMN-_binding_protein
098aacdb6f4775a1d9a5e1c40c05873f	phosphotransferase_enzyme_family_protein_putative
098c172e4a80ffe0b901dfc503214229	transcriptional_regulator
098d197c51bc35d03d780dc7866b7f8d	acyl-CoA_dehydrogenase_type_2
098d80fcd2d92ef342b90222481495f6	phage_integrase_family_protein
098dbe0f9d801c03140f43de602960c6	chorismate_synthase
098dd25de27154b31580c9d5221a5fd0	beta-hexosaminidase
098e6637963b2a632e127a068085eede	aldehyde_dehydrogenase
098f468cd0d98a3b1b7468fd75cc9e1d	IclR_family_transcriptional_regulator
098fe4a04c4099d600a7304d4b99b0ee	ABC_transporter_related_protein
099039d6917ed4dbe06240e116536f15	hypothetical_protein
0991495168d63b072348d1d2717f36a7	hypothetical_protein
0991d33613ee166cf65feb93f4ea6d76	hypothetical_protein
09931e295b7e6b04fbe7369b5f87c806	hypothetical_protein
09932f93bc890da422e9bdad31d72b92	phosphoribosyl-ATP_diphosphatase_hise
0993adb0d18e12f25a9a34baea8f56f5	radical_activating_enzyme
0994e7112608128d51209d910ebfaaae	hypothetical_protein
[truncated: 38,092 more rows]

## Sheet: Intersection tomato-ruderal
MD5sum ID	Refseq protein
0000679ceb3fc9c950779468e06329a7	hyalin_repeat_protein
0004131267fc2dfc3165df48d4ed1d1f	tRNAIle-lysidine_synthetase
0004f6344ef0fcdc8c3d8bf6533bf1bc	transcriptional_regulator_AraC_family
0005a160e8a9cbbeae69c48ce94bba1b	NAD-dependent_epimerase-dehydratase
00067cb2d132cffb578537995d49887d	MJ0042_family_finger-like_protein
0009915555b46241f3220a9f1be9582f	transcription-repair_coupling_factor
000a9e84cd6c8a170e55c6f1d495bcc6	thymidine_phosphorylase
000b38631b35f15f1e529a436ad8d826	conserved_hypothetical_protein
000b966c81f1694195b7993fa7a47f9d	iron_dependent_repressor
000d9be902ab8a07c0ac0bb1456f6260	ABC_transporter_ATP-binding_protein
000e52687bb5051fff06e49c3ea70f4e	hypothetical_protein
000e9c3eaeab01ae5b5dc4288dc91f2c	hypothetical_protein
000f0cf29060d2a2c8e9e88e07103700	Pyrrolo-quinoline_quinone
00106943c7edda59859194e4e5eb72ca	urea_amidolyase
001244a2394678835bc1b3edd9112ee0	Leu1
00128a6e21760e4be9230e7a3b38dd44	putative_RNA_polymerase_sigma-e_factor_sigma-24
00188f219237016443eb67bcd855d7a5	hypothetical_protein
001a403190c80e44faf2be76650fd15c	putative_bifunctional_OHCU_decarboxylase-allantoate_amidohydrolase
001ba14e7c6f67b842ec0b0a982a4dc8	hypothetical_protein
001c8addf231789b8971cef2a6bd7ca3	hypothetical_protein
001dfca5c5e8647d03ae5c18ee7439ae	SNF2-related_protein
001f33e59574eab84be899fa212f25b4	ThiJ-PfpI_domain_protein
002007ec9f85208e6d9fc7299ec01f05	putative_dinucleoside_polyphosphate_hydrolase
0020a49fabc643a5748591afa53b56e7	ATPase_central_domain-containing_protein
0020b180be1c61da1660938f55923f33	VGR-related_protein
00210eddd7ecc3d93a892ba683ac4d8b	cation_diffusion_facilitator_family_transporter
00219475a60d308bba4799084b5a929b	RDD_domain_containing_protein
0021b6fe4a3731148d6dc0fdd53cac41	acyl-CoA_dehydrogenase_domain_protein
00229101044b36dd8a08be84da3a2e33	succinate_dehydrogenase-fumarate_reductase_iron-sulfur_subunit
0022eb6b5651bf99a078a8ec2abbdb04	anaerobic_ribonucleoside_triphosphate_reductase
002340da4ae60384ea388c6fa6c5e730	ubiquinone-menaquinone_biosynthesis_methyltransferase
00266894d148e5c46f25667499b65fc4	iduronate-2-sulfatase
00288f43caf5e1e32479da670d25ab33	chaperonin_GroEL
002913c25546b2b8128859ef2c659129	D-hydantoinase
0029431d77e9cb8982bb2230e072ed0c	wall-associated_protein
002ad401fff6476bb1454ca3687b1e6e	2-oxoacid_ferredoxin_oxidoreductase
002d20f84b8c8aa8511077b14db420f2	pirin
002d9df2095a4fa95321609e89d2c773	isocitrate_dehydrogenase
002e08fdb120b400fcb1086a26d256fa	hypothetical_protein
0030131536be7164363dce88a0e4ff28	RecA-superfamily_ATPase_implicated_in_signal_transduction
00305ee5e5d9d4810c80d37039fdb868	ClpB
0031a73494fc501d73548978395674ae	hypothetical_protein
003269687dc825dfddff947c41adad77	helix-turn-helix_domain-containing_protein
0034c230526073f9edcfe761fbf3b82f	hypothetical_protein
00354b9a4c9dc76a4b8aaee0aeb6153a	Integrase_catalytic_region
0035968a26a4b684e4f79be36a87ea4d	cAMP-regulatory_protein
003697302f5a2355750654ab5992fbe9	acyltransferase
0037dd87526d96cf45da019404c2637b	integral_membrane_sensor_signal_transduction_histidine_kinase
0037e87eed66acf94be3fe3e20d719af	histidine_kinase
003825da225009535b3daebe0259583f	TPR_repeat-containing_protein
003c0f4d512c8ef8fc2eaebac36a9079	glycosyl_transferase_group_1
003df6a6c44ef35aa87ae9916476d290	50S_ribosomal_protein_L25-general_stress_protein_Ctc
003eea3464e9bf00033a61d63b508525	twitching_mobility_protein
00401755002074e44e6a1bafb4163a3d	methyltransferase_domain_protein
0040279ee63610b0d3afd1d1543eadb2	D-alanyl-alanine_synthetase_A
004051ab636f341278747fb65e37240f	Conserved_hypothetical_protein_CHP02001
0042e2666c580f90893aa599f6cf2bc2	mannose-1-phosphate_guanyltransferase
0043fe3c4a41c25be26484aa660bbbbb	FKBP-type_peptidyl-prolyl_cis-trans_isomerase
004455ca059b1ab3b3ee98730474de15	preprotein_translocase_SecY_subunit
0047ee0852b32cdc52d65fb08c757778	nitrate_reductase_catalytic_subunit
004c34839eccf41a2ababdef454d562b	D-lactate_dehydrogenase
004ce35ac8a205a6586a68ef9cf061ff	hypothetical_protein
004ddc113630e22d35f86b3d027a8fb5	leucyl-tRNA_synthetase
[truncated: 34,907 more rows]

## Sheet: Unique tomato
MD5sum ID	Refseq protein
[truncated: 94,561 more rows]

## Sheet: Unique soils
MD5sum ID	Refseq protein
[truncated: 75,205 more rows]

[truncated: 1 more sheets: Unique Ruderals]
