# Supplementary material for: Testing the Two-Step Model of Plant Root Microbiome Acquisition Under Multiple Plant Species and Soil Sources
Source: Front Microbiol. 2020 Oct 9;11:542742. doi: 10.3389/fmicb.2020.542742 (PMC7581803; doi:10.3389/fmicb.2020.542742)
Supplement: Supplementary file 10 [file Table_9.XLSX]

## Sheet: alpha diversity annotated and non annotated proteins
Sample	Observed	Chao1	se.chao1	ACE	se.ACE	Shannon	Simpson	InvSimpson	Fisher
AGS1RF	159203	200773	477.766	206473	227.729	11.0635	0.999961	25784.7	54699
AGS1RZ	236463	431403	NA	505749	483.258	11.5294	0.999955	22055.6	138695
AGS1SI	208320	429263	NA	512746	468.867	11.7787	0.999951	20482.1	187791
DGO1RF	219757	309585	NA	321917	313.36	11.3494	0.999966	29754.1	83816.8
DGO1RZ	87041	124312	490.997	131953	214.576	10.5028	0.999762	4207.99	46405.3
DGO1SI	163027	358181	NA	419478	391.056	11.6724	0.999974	38480.5	183034
JAL5RF	220615	354866	NA	383847	385.885	11.4163	0.999963	27068.2	101844
JAL5RZ	131978	242689	NA	274938	341.496	11.066	0.999858	7039.38	97551.6
JAL5SI	88722	177847	1018.34	206428	286.906	10.9465	0.999901	10054.3	85692.7
NAY2RZ	196866	239972	NA	245477	234.744	11.0583	0.999919	12330.3	70915.6
NAY2SI	339205	599139	NA	698908	566.112	11.8912	0.999976	42062.3	192777
SIN2RF	297930	474429	NA	521921	453.582	11.5903	0.999976	41637.1	120344
SIN2RZ	330495	560971	NA	632418	522.503	11.8927	0.999912	11311.4	185013
SIN2SI	304438	544646	NA	625932	527.443	11.7571	0.999959	24642	188651
SLP1RF	99321	127493	394.503	132628	188.117	10.5468	0.999921	12651.5	36191.6
SLP1RZ	330992	637143	NA	747974	559.385	12.3301	0.999987	76581.7	311297
SLP1SI	234408	463313	NA	540663	484.105	12.0037	0.999978	44893.9	212287

## Sheet: alpha diversity annotated proteins
Sample	Observed	Chao1	se.chao1	ACE	se.ACE	Shannon	Simpson	InvSimpson	Fisher
AGS1RF	47111	50857.2	116.585	51221.4	106.398	9.96834	0.999913	11558.7	12182.7
AGS1RZ	47995	66886	357.762	70952.1	151.037	9.77483	0.999841	6284.88	17279.6
AGS1SI	37960	56331.2	363.554	60877.4	148.741	10.05	0.999917	12054.5	21176.6
DGO1RF	61108	69512.9	194.596	69553.6	121.712	10.1315	0.999911	11229.8	17083.2
DGO1RZ	26215	31540.4	151.514	32741.1	85.1058	9.69731	0.999656	2904.72	13083.6
DGO1SI	34051	52249.5	368.586	56890.1	149.622	9.93767	0.999866	7477.95	21414.9
JAL5RF	58723	72249.9	271.523	73296.2	131.019	10.1151	0.999907	10744.2	18788.7
JAL5RZ	34074	47978.5	294.376	50890.7	131.102	10.0164	0.99989	9130.77	21025.8
JAL5SI	21409	31994.9	268.923	34616	115.745	9.69037	0.999908	10925.8	15958
NAY2RZ	62281	66525.6	116.198	67051.4	108.657	9.90714	0.9998	5007.45	17195.1
NAY2SI	57795	74055.3	303.026	76728.3	141.976	9.97887	0.999884	8602.24	19698
SIN2RF	71636	85714.1	279.246	85931.2	143.886	10.3201	0.999941	16844.1	19188.5
SIN2RZ	71795	89434.2	310.673	90615.6	143.445	10.573	0.999947	19029.9	27216.4
SIN2SI	48936	64043.5	296.853	66741.2	134.857	9.59025	0.999773	4395.98	16856.4
SLP1RF	34039	37642.3	115.529	38359.8	88.871	9.52763	0.999838	6182.42	9657.45
SLP1RZ	66282	95763.9	442.457	102860	191.566	10.5812	0.999933	14947.1	38012.6
SLP1SI	45741	67969.7	398.737	73564.3	163.887	10.2827	0.999936	15658	26818.8
