# Supplementary material for: Testing the Two-Step Model of Plant Root Microbiome Acquisition Under Multiple Plant Species and Soil Sources
Source: Front Microbiol. 2020 Oct 9;11:542742. doi: 10.3389/fmicb.2020.542742 (PMC7581803; doi:10.3389/fmicb.2020.542742)
Supplement: Supplementary file 11 [file Table_10.XLSX]

## Sheet: all
type	percent	reads	taxon_id	domain	phylum	class	order	family	genus	species
soil	50.3444	6928600	NA	unclassified
tomato	49.6286	8356937	NA	unclassified
tomato	48.7042	6712394	NA	unclassified
soil	48.1246	6410719	NA	unclassified
soil	47.5766	6949633	NA	unclassified
ruderals	46.7554	5572172	NA	unclassified
tomato	46.1886	6632107	NA	unclassified
soil	45.7791	5687047	NA	unclassified
tomato	45.4465	6707810	NA	unclassified
ruderals	45.1622	7567137	NA	unclassified
tomato	44.9194	6689051	NA	unclassified
ruderals	44.717	7446719	NA	unclassified
soil	44.3615	6569097	NA	unclassified
ruderals	44.0473	7291175	NA	unclassified
soil	42.6061	5792317	NA	unclassified
ruderals	41.9878	6605941	NA	unclassified
ruderals	18.4164	2897457	NA	cannot be assigned to a (non-viral) species
tomato	17.8311	2655271	NA	cannot be assigned to a (non-viral) species
ruderals	17.6755	2925845	NA	cannot be assigned to a (non-viral) species
ruderals	17.5623	2942641	NA	cannot be assigned to a (non-viral) species
ruderals	17.3124	2883029	NA	cannot be assigned to a (non-viral) species
soil	17.2883	2350348	NA	cannot be assigned to a (non-viral) species
tomato	17.1836	2536265	NA	cannot be assigned to a (non-viral) species
soil	16.8005	2487832	NA	cannot be assigned to a (non-viral) species
ruderals	16.305	1943179	NA	cannot be assigned to a (non-viral) species
soil	16.2448	2372912	NA	cannot be assigned to a (non-viral) species
soil	16.1889	2011120	NA	cannot be assigned to a (non-viral) species
tomato	16.1753	2229273	NA	cannot be assigned to a (non-viral) species
tomato	16.1059	2312604	NA	cannot be assigned to a (non-viral) species
tomato	15.7501	2652151	NA	cannot be assigned to a (non-viral) species
soil	15.4717	2061002	NA	cannot be assigned to a (non-viral) species
soil	14.7155	2025208	NA	cannot be assigned to a (non-viral) species
ruderals	0.560108	92715	1380389	Bacteria	Proteobacteria	Alphaproteobacteria	Sphingomonadales	Sphingomonadaceae	Sphingomonas	Sphingomonas sp. URHD0057
tomato	0.525745	88530	1617423	Bacteria	Acidobacteria	NA	NA	NA	NA	Acidobacteria bacterium OLB17
soil	0.555993	82332	363832	Bacteria	Actinobacteria	Thermoleophilia	Solirubrobacterales	Solirubrobacteraceae	Solirubrobacter	Solirubrobacter soli
soil	0.563775	77589	332163	Bacteria	Acidobacteria	Solibacteres	Solibacterales	Solibacteraceae	Candidatus Solibacter	Candidatus Solibacter usitatus
soil	0.552922	75170	363832	Bacteria	Actinobacteria	Thermoleophilia	Solirubrobacterales	Solirubrobacteraceae	Solirubrobacter	Solirubrobacter soli
tomato	0.516828	74210	1803431	Bacteria	Acidobacteria	NA	NA	NA	NA	Acidobacteria bacterium 13_1_20CM_3_53_8
ruderals	0.42635	71000	363832	Bacteria	Actinobacteria	Thermoleophilia	Solirubrobacterales	Solirubrobacteraceae	Solirubrobacter	Solirubrobacter soli
soil	0.565049	70195	363832	Bacteria	Actinobacteria	Thermoleophilia	Solirubrobacterales	Solirubrobacteraceae	Solirubrobacter	Solirubrobacter soli
tomato	0.446988	66562	363832	Bacteria	Actinobacteria	Thermoleophilia	Solirubrobacterales	Solirubrobacteraceae	Solirubrobacter	Solirubrobacter soli
tomato	0.388628	65441	1380389	Bacteria	Proteobacteria	Alphaproteobacteria	Sphingomonadales	Sphingomonadaceae	Sphingomonas	Sphingomonas sp. URHD0057
soil	0.515785	64075	1298857	Bacteria	Actinobacteria	Thermoleophilia	Solirubrobacterales	Solirubrobacteraceae	Solirubrobacter	Solirubrobacter sp. URHD0082
ruderals	0.388521	61126	363832	Bacteria	Actinobacteria	Thermoleophilia	Solirubrobacterales	Solirubrobacteraceae	Solirubrobacter	Solirubrobacter soli
tomato	0.41405	61113	363832	Bacteria	Actinobacteria	Thermoleophilia	Solirubrobacterales	Solirubrobacteraceae	Solirubrobacter	Solirubrobacter soli
soil	0.394041	58350	1298857	Bacteria	Actinobacteria	Thermoleophilia	Solirubrobacterales	Solirubrobacteraceae	Solirubrobacter	Solirubrobacter sp. URHD0082
soil	0.418027	56831	1298857	Bacteria	Actinobacteria	Thermoleophilia	Solirubrobacterales	Solirubrobacteraceae	Solirubrobacter	Solirubrobacter sp. URHD0082
tomato	0.380184	56614	1298857	Bacteria	Actinobacteria	Thermoleophilia	Solirubrobacterales	Solirubrobacteraceae	Solirubrobacter	Solirubrobacter sp. URHD0082
soil	0.38613	56403	674703	Bacteria	Proteobacteria	Alphaproteobacteria	Rhizobiales	Hyphomicrobiaceae	Rhodoplanes	Rhodoplanes sp. Z2-YC6860
tomato	0.389226	55888	1617423	Bacteria	Acidobacteria	NA	NA	NA	NA	Acidobacteria bacterium OLB17
ruderals	0.334621	55390	674703	Bacteria	Proteobacteria	Alphaproteobacteria	Rhizobiales	Hyphomicrobiaceae	Rhodoplanes	Rhodoplanes sp. Z2-YC6860
soil	0.368413	54555	674703	Bacteria	Proteobacteria	Alphaproteobacteria	Rhizobiales	Hyphomicrobiaceae	Rhodoplanes	Rhodoplanes sp. Z2-YC6860
soil	0.403819	53793	363832	Bacteria	Actinobacteria	Thermoleophilia	Solirubrobacterales	Solirubrobacteraceae	Solirubrobacter	Solirubrobacter soli
soil	0.374126	46477	497727	Archaea	Thaumarchaeota	Nitrososphaeria	Nitrososphaerales	Nitrososphaeraceae	Nitrososphaera	Candidatus Nitrososphaera gargensis
ruderals	0.324097	53648	332163	Bacteria	Acidobacteria	Solibacteres	Solibacterales	Solibacteraceae	Candidatus Solibacter	Candidatus Solibacter usitatus
ruderals	0.319878	53597	1380389	Bacteria	Proteobacteria	Alphaproteobacteria	Sphingomonadales	Sphingomonadaceae	Sphingomonas	Sphingomonas sp. URHD0057
soil	0.410841	51038	191495	Bacteria	Actinobacteria	Thermoleophilia	Solirubrobacterales	Conexibacteraceae	Conexibacter	Conexibacter woesei
tomato	0.36875	50821	1881035	Bacteria	Proteobacteria	Betaproteobacteria	Burkholderiales	NA	Mitsuaria	Mitsuaria sp. PDC51
soil	0.369686	50259	191495	Bacteria	Actinobacteria	Thermoleophilia	Solirubrobacterales	Conexibacteraceae	Conexibacter	Conexibacter woesei
soil	0.36264	49908	1032527	Bacteria	Verrucomicrobia	Verrucomicrobiae	Verrucomicrobiales	Verrucomicrobia subdivision 3	Pedosphaera	Pedosphaera parvula
tomato	0.337654	49837	1380389	Bacteria	Proteobacteria	Alphaproteobacteria	Sphingomonadales	Sphingomonadaceae	Sphingomonas	Sphingomonas sp. URHD0057
ruderals	0.294824	49097	1298857	Bacteria	Actinobacteria	Thermoleophilia	Solirubrobacterales	Solirubrobacteraceae	Solirubrobacter	Solirubrobacter sp. URHD0082
soil	0.35504	48862	658062	Bacteria	Acidobacteria	Acidobacteriia	Acidobacteriales	Acidobacteriaceae	Candidatus Koribacter	Candidatus Koribacter versatilis
tomato	0.289495	48748	861299	Bacteria	Gemmatimonadetes	Gemmatimonadetes	Gemmatimonadales	Gemmatimonadaceae	Gemmatirosa	Gemmatirosa kalamazoonesis
ruderals	0.294278	48712	1380391	Bacteria	Proteobacteria	Alphaproteobacteria	Rhodospirillales	Rhodospirillaceae	Dongia	Dongia sp. URHE0060
tomato	0.339111	48692	861299	Bacteria	Gemmatimonadetes	Gemmatimonadetes	Gemmatimonadales	Gemmatimonadaceae	Gemmatirosa	Gemmatirosa kalamazoonesis
ruderals	0.292296	48384	543632	Bacteria	Actinobacteria	Actinobacteria	Micromonosporales	Micromonosporaceae	Actinoplanes	Actinoplanes subtropicus
soil	0.352886	47975	1803431	Bacteria	Acidobacteria	NA	NA	NA	NA	Acidobacteria bacterium 13_1_20CM_3_53_8
ruderals	0.288992	47837	1803431	Bacteria	Acidobacteria	NA	NA	NA	NA	Acidobacteria bacterium 13_1_20CM_3_53_8
soil	0.380928	47322	56	Bacteria	Proteobacteria	Deltaproteobacteria	Myxococcales	Polyangiaceae	Sorangium	Sorangium cellulosum
soil	0.31632	46841	1380391	Bacteria	Proteobacteria	Alphaproteobacteria	Rhodospirillales	Rhodospirillaceae	Dongia	Dongia sp. URHE0060
soil	0.311486	42868	588596	Eukaryota	Mucoromycota	Glomeromycetes	Glomerales	Glomeraceae	Rhizophagus	Rhizophagus irregularis
ruderals	0.275594	46177	363832	Bacteria	Actinobacteria	Thermoleophilia	Solirubrobacterales	Solirubrobacteraceae	Solirubrobacter	Solirubrobacter soli
soil	0.312057	45583	56	Bacteria	Proteobacteria	Deltaproteobacteria	Myxococcales	Polyangiaceae	Sorangium	Sorangium cellulosum
ruderals	0.285374	44898	1380391	Bacteria	Proteobacteria	Alphaproteobacteria	Rhodospirillales	Rhodospirillaceae	Dongia	Dongia sp. URHE0060
tomato	0.312193	44827	1736464	Bacteria	Proteobacteria	Betaproteobacteria	Burkholderiales	Comamonadaceae	Pelomonas	Pelomonas sp. Root1444
soil	0.305821	44672	861299	Bacteria	Gemmatimonadetes	Gemmatimonadetes	Gemmatimonadales	Gemmatimonadaceae	Gemmatirosa	Gemmatirosa kalamazoonesis
soil	0.318086	43244	861299	Bacteria	Gemmatimonadetes	Gemmatimonadetes	Gemmatimonadales	Gemmatimonadaceae	Gemmatirosa	Gemmatirosa kalamazoonesis
soil	0.323968	43156	1298857	Bacteria	Actinobacteria	Thermoleophilia	Solirubrobacterales	Solirubrobacteraceae	Solirubrobacter	Solirubrobacter sp. URHD0082
tomato	0.289177	42682	688867	Bacteria	Bacteroidetes	Cytophagia	Cytophagales	Cytophagaceae	Ohtaekwangia	Ohtaekwangia koreensis
tomato	0.288215	42540	861299	Bacteria	Gemmatimonadetes	Gemmatimonadetes	Gemmatimonadales	Gemmatimonadaceae	Gemmatirosa	Gemmatirosa kalamazoonesis
tomato	0.252498	42518	1803431	Bacteria	Acidobacteria	NA	NA	NA	NA	Acidobacteria bacterium 13_1_20CM_3_53_8
tomato	0.294302	42258	56	Bacteria	Proteobacteria	Deltaproteobacteria	Myxococcales	Polyangiaceae	Sorangium	Sorangium cellulosum
soil	0.305637	42063	861299	Bacteria	Gemmatimonadetes	Gemmatimonadetes	Gemmatimonadales	Gemmatimonadaceae	Gemmatirosa	Gemmatirosa kalamazoonesis
soil	0.28375	41448	363832	Bacteria	Actinobacteria	Thermoleophilia	Solirubrobacterales	Solirubrobacteraceae	Solirubrobacter	Solirubrobacter soli
ruderals	0.250002	41383	1267535	Bacteria	Acidobacteria	Acidobacteriia	Acidobacteriales	Acidobacteriaceae	NA	Acidobacteriaceae bacterium KBS 96
tomato	0.27766	41347	415425	Bacteria	Bacteroidetes	Flavobacteriia	Flavobacteriales	Flavobacteriaceae	Flavobacterium	Flavobacterium terrae
ruderals	0.24652	41053	56	Bacteria	Proteobacteria	Deltaproteobacteria	Myxococcales	Polyangiaceae	Sorangium	Sorangium cellulosum
soil	0.284493	38677	588596	Eukaryota	Mucoromycota	Glomeromycetes	Glomerales	Glomeraceae	Rhizophagus	Rhizophagus irregularis
ruderals	0.246094	40982	1380389	Bacteria	Proteobacteria	Alphaproteobacteria	Sphingomonadales	Sphingomonadaceae	Sphingomonas	Sphingomonas sp. URHD0057
tomato	0.242634	40857	392409	Bacteria	Proteobacteria	Alphaproteobacteria	Sphingomonadales	Sphingomonadaceae	Sphingomonas	Sphingomonas jaspsi
soil	0.274931	40712	191495	Bacteria	Actinobacteria	Thermoleophilia	Solirubrobacterales	Conexibacteraceae	Conexibacter	Conexibacter woesei
ruderals	0.242438	40131	861299	Bacteria	Gemmatimonadetes	Gemmatimonadetes	Gemmatimonadales	Gemmatimonadaceae	Gemmatirosa	Gemmatirosa kalamazoonesis
soil	0.291468	40113	1803434	Bacteria	Acidobacteria	NA	NA	NA	NA	Acidobacteria bacterium 13_1_20CM_4_56_7
ruderals	0.252291	39693	56	Bacteria	Proteobacteria	Deltaproteobacteria	Myxococcales	Polyangiaceae	Sorangium	Sorangium cellulosum
tomato	0.265123	39480	861299	Bacteria	Gemmatimonadetes	Gemmatimonadetes	Gemmatimonadales	Gemmatimonadaceae	Gemmatirosa	Gemmatirosa kalamazoonesis
ruderals	0.238391	39461	1437360	Bacteria	Proteobacteria	Alphaproteobacteria	Rhizobiales	Bradyrhizobiaceae	Bradyrhizobium	Bradyrhizobium erythrophlei
ruderals	0.236348	39359	191495	Bacteria	Actinobacteria	Thermoleophilia	Solirubrobacterales	Conexibacteraceae	Conexibacter	Conexibacter woesei
soil	0.285539	39297	674703	Bacteria	Proteobacteria	Alphaproteobacteria	Rhizobiales	Hyphomicrobiaceae	Rhodoplanes	Rhodoplanes sp. Z2-YC6860
tomato	0.273116	39216	1703345	Bacteria	Bacteroidetes	Chitinophagia	Chitinophagales	Chitinophagaceae	Niastella	Niastella vici
soil	0.2912	38791	56	Bacteria	Proteobacteria	Deltaproteobacteria	Myxococcales	Polyangiaceae	Sorangium	Sorangium cellulosum
tomato	0.278995	38451	1380389	Bacteria	Proteobacteria	Alphaproteobacteria	Sphingomonadales	Sphingomonadaceae	Sphingomonas	Sphingomonas sp. URHD0057
ruderals	0.24284	38206	861299	Bacteria	Gemmatimonadetes	Gemmatimonadetes	Gemmatimonadales	Gemmatimonadaceae	Gemmatirosa	Gemmatirosa kalamazoonesis
soil	0.276333	38030	56	Bacteria	Proteobacteria	Deltaproteobacteria	Myxococcales	Polyangiaceae	Sorangium	Sorangium cellulosum
soil	0.284579	37909	1803431	Bacteria	Acidobacteria	NA	NA	NA	NA	Acidobacteria bacterium 13_1_20CM_3_53_8
ruderals	0.226731	37531	363832	Bacteria	Actinobacteria	Thermoleophilia	Solirubrobacterales	Solirubrobacteraceae	Solirubrobacter	Solirubrobacter soli
tomato	0.253669	37441	1797193	Bacteria	Acidobacteria	NA	NA	NA	NA	Acidobacteria bacterium RIFCSPLOWO2_12_FULL_67_14b
ruderals	0.312216	37209	363832	Bacteria	Actinobacteria	Thermoleophilia	Solirubrobacterales	Solirubrobacteraceae	Solirubrobacter	Solirubrobacter soli
tomato	0.258734	37151	454194	Bacteria	Acidobacteria	Blastocatellia	NA	NA	Pyrinomonas	Pyrinomonas methylaliphatogenes
ruderals	0.309816	36923	465721	Bacteria	Proteobacteria	Gammaproteobacteria	Nevskiales	Sinobacteraceae	Steroidobacter	Steroidobacter denitrificans
tomato	0.257049	36909	947013	Bacteria	Bacteroidetes	Cytophagia	Cytophagales	NA	Chryseolinea	Chryseolinea serpens
tomato	0.212531	35788	1797193	Bacteria	Acidobacteria	NA	NA	NA	NA	Acidobacteria bacterium RIFCSPLOWO2_12_FULL_67_14b
ruderals	0.22693	35703	674703	Bacteria	Proteobacteria	Alphaproteobacteria	Rhizobiales	Hyphomicrobiaceae	Rhodoplanes	Rhodoplanes sp. Z2-YC6860
tomato	0.240125	35442	1298857	Bacteria	Actinobacteria	Thermoleophilia	Solirubrobacterales	Solirubrobacteraceae	Solirubrobacter	Solirubrobacter sp. URHD0082
ruderals	0.211495	35437	1617423	Bacteria	Acidobacteria	NA	NA	NA	NA	Acidobacteria bacterium OLB17
soil	0.258925	35201	1380353	Bacteria	Actinobacteria	Actinobacteria	Geodermatophilales	Geodermatophilaceae	NA	Geodermatophilaceae bacterium URHB0062
tomato	0.235944	35135	191495	Bacteria	Actinobacteria	Thermoleophilia	Solirubrobacterales	Conexibacteraceae	Conexibacter	Conexibacter woesei
soil	0.282223	35060	861299	Bacteria	Gemmatimonadetes	Gemmatimonadetes	Gemmatimonadales	Gemmatimonadaceae	Gemmatirosa	Gemmatirosa kalamazoonesis
tomato	0.242814	34865	77133	Bacteria	NA	NA	NA	NA	NA	uncultured bacterium
tomato	0.235992	34832	674703	Bacteria	Proteobacteria	Alphaproteobacteria	Rhizobiales	Hyphomicrobiaceae	Rhodoplanes	Rhodoplanes sp. Z2-YC6860
tomato	0.206402	34756	1813736	Bacteria	Acidobacteria	NA	NA	NA	NA	Acidobacteria bacterium DSM 100886
tomato	0.235254	34723	1617423	Bacteria	Acidobacteria	NA	NA	NA	NA	Acidobacteria bacterium OLB17
soil	0.234365	34705	332163	Bacteria	Acidobacteria	Solibacteres	Solibacterales	Solibacteraceae	Candidatus Solibacter	Candidatus Solibacter usitatus
soil	0.248707	34228	363277	Bacteria	Chloroflexi	Ktedonobacteria	Ktedonobacterales	Ktedonobacteraceae	Ktedonobacter	Ktedonobacter racemifer
soil	0.233432	34098	1380391	Bacteria	Proteobacteria	Alphaproteobacteria	Rhodospirillales	Rhodospirillaceae	Dongia	Dongia sp. URHE0060
tomato	0.199763	33638	77133	Bacteria	NA	NA	NA	NA	NA	uncultured bacterium
tomato	0.227283	32635	1985174	Bacteria	Bacteroidetes	Chitinophagia	Chitinophagales	Chitinophagaceae	NA	Chitinophagaceae bacterium IBVUCB2
tomato	0.226642	32543	688867	Bacteria	Bacteroidetes	Cytophagia	Cytophagales	Cytophagaceae	Ohtaekwangia	Ohtaekwangia koreensis
tomato	0.235068	32397	1617423	Bacteria	Acidobacteria	NA	NA	NA	NA	Acidobacteria bacterium OLB17
ruderals	0.271453	32351	56	Bacteria	Proteobacteria	Deltaproteobacteria	Myxococcales	Polyangiaceae	Sorangium	Sorangium cellulosum
tomato	0.217	32314	1396141	Bacteria	Verrucomicrobia	Verrucomicrobiae	Verrucomicrobiales	Verrucomicrobiaceae	Haloferula	Haloferula sp. BvORR071		0.156361	0.0328913
soil	0.237182	32245	196914	Bacteria	Actinobacteria	Actinobacteria	Micromonosporales	Micromonosporaceae	Actinoplanes	Actinoplanes friuliensis
soil	0.241062	32112	191495	Bacteria	Actinobacteria	Thermoleophilia	Solirubrobacterales	Conexibacteraceae	Conexibacter	Conexibacter woesei
ruderals	0.192662	32084	1803431	Bacteria	Acidobacteria	NA	NA	NA	NA	Acidobacteria bacterium 13_1_20CM_3_53_8
ruderals	0.203152	31962	947013	Bacteria	Bacteroidetes	Cytophagia	Cytophagales	NA	Chryseolinea	Chryseolinea serpens
ruderals	0.191479	31887	1797193	Bacteria	Acidobacteria	NA	NA	NA	NA	Acidobacteria bacterium RIFCSPLOWO2_12_FULL_67_14b
tomato	0.188248	31699	56	Bacteria	Proteobacteria	Deltaproteobacteria	Myxococcales	Polyangiaceae	Sorangium	Sorangium cellulosum
soil	0.216961	31692	888845	Bacteria	Proteobacteria	Deltaproteobacteria	Myxococcales	NA	Minicystis	Minicystis rosea
soil	0.213525	31619	1380357	Bacteria	Proteobacteria	Alphaproteobacteria	Rhodospirillales	NA	NA	Rhodospirillales bacterium URHD0017
tomato	0.21144	31486	35752	Bacteria	Actinobacteria	Actinobacteria	Micromonosporales	Micromonosporaceae	Actinoplanes	Actinoplanes philippinensis
soil	0.252962	31425	1803431	Bacteria	Acidobacteria	NA	NA	NA	NA	Acidobacteria bacterium 13_1_20CM_3_53_8
soil	0.235094	31317	1797193	Bacteria	Acidobacteria	NA	NA	NA	NA	Acidobacteria bacterium RIFCSPLOWO2_12_FULL_67_14b
soil	0.211134	31265	1803431	Bacteria	Acidobacteria	NA	NA	NA	NA	Acidobacteria bacterium 13_1_20CM_3_53_8
soil	0.209743	31059	1895833	Bacteria	Actinobacteria	Thermoleophilia	Solirubrobacterales	NA	NA	Solirubrobacterales bacterium 70-9
ruderals	0.187307	31005	113565	Bacteria	Actinobacteria	Actinobacteria	Micromonosporales	Micromonosporaceae	Actinoplanes	Actinoplanes globisporus
tomato	0.210064	31005	1813736	Bacteria	Acidobacteria	NA	NA	NA	NA	Acidobacteria bacterium DSM 100886
soil	0.209372	31004	861299	Bacteria	Gemmatimonadetes	Gemmatimonadetes	Gemmatimonadales	Gemmatimonadaceae	Gemmatirosa	Gemmatirosa kalamazoonesis
tomato	0.209224	30881	1380391	Bacteria	Proteobacteria	Alphaproteobacteria	Rhodospirillales	Rhodospirillaceae	Dongia	Dongia sp. URHE0060
ruderals	0.185796	30755	1895841	Bacteria	Bacteroidetes	Sphingobacteriia	Sphingobacteriales	NA	NA	Sphingobacteriales bacterium 50-39
soil	0.226112	30740	1798228	Bacteria	Actinobacteria	Actinobacteria	Geodermatophilales	Geodermatophilaceae	Blastococcus	Blastococcus sp. DSM 46838
tomato	0.208024	30704	77133	Bacteria	NA	NA	NA	NA	NA	uncultured bacterium
tomato	0.205524	30605	1617423	Bacteria	Acidobacteria	NA	NA	NA	NA	Acidobacteria bacterium OLB17
tomato	0.209991	30152	1797193	Bacteria	Acidobacteria	NA	NA	NA	NA	Acidobacteria bacterium RIFCSPLOWO2_12_FULL_67_14b
ruderals	0.182039	30133	1298857	Bacteria	Actinobacteria	Thermoleophilia	Solirubrobacterales	Solirubrobacteraceae	Solirubrobacter	Solirubrobacter sp. URHD0082
soil	0.218101	30016	1380348	Bacteria	Acidobacteria	Acidobacteriia	Acidobacteriales	Acidobacteriaceae	NA	Acidobacteriaceae bacterium URHE0068
ruderals	0.179926	29963	861299	Bacteria	Gemmatimonadetes	Gemmatimonadetes	Gemmatimonadales	Gemmatimonadaceae	Gemmatirosa	Gemmatirosa kalamazoonesis
ruderals	0.179523	29896	1813736	Bacteria	Acidobacteria	NA	NA	NA	NA	Acidobacteria bacterium DSM 100886
soil	0.24038	29862	1797501	Bacteria	Proteobacteria	Betaproteobacteria	NA	NA	NA	Betaproteobacteria bacterium RIFCSPLOWO2_12_FULL_65_14
tomato	0.216457	29832	861299	Bacteria	Gemmatimonadetes	Gemmatimonadetes	Gemmatimonadales	Gemmatimonadaceae	Gemmatirosa	Gemmatirosa kalamazoonesis
soil	0.217984	29635	56	Bacteria	Proteobacteria	Deltaproteobacteria	Myxococcales	Polyangiaceae	Sorangium	Sorangium cellulosum
ruderals	0.188228	29614	688867	Bacteria	Bacteroidetes	Cytophagia	Cytophagales	Cytophagaceae	Ohtaekwangia	Ohtaekwangia koreensis
soil	0.201824	29481	1437360	Bacteria	Proteobacteria	Alphaproteobacteria	Rhizobiales	Bradyrhizobiaceae	Bradyrhizobium	Bradyrhizobium erythrophlei
soil	0.200277	29255	1380389	Bacteria	Proteobacteria	Alphaproteobacteria	Sphingomonadales	Sphingomonadaceae	Sphingomonas	Sphingomonas sp. URHD0057
tomato	0.197984	29222	1803431	Bacteria	Acidobacteria	NA	NA	NA	NA	Acidobacteria bacterium 13_1_20CM_3_53_8
tomato	0.201466	28928	1736584	Bacteria	Proteobacteria	Alphaproteobacteria	Sphingomonadales	Erythrobacteraceae	Altererythrobacter	Altererythrobacter sp. Root672
ruderals	0.174536	28891	191495	Bacteria	Actinobacteria	Thermoleophilia	Solirubrobacterales	Conexibacteraceae	Conexibacter	Conexibacter woesei
ruderals	0.172368	28881	196914	Bacteria	Actinobacteria	Actinobacteria	Micromonosporales	Micromonosporaceae	Actinoplanes	Actinoplanes friuliensis
ruderals	0.172213	28855	186479	Bacteria	Chloroflexi	NA	NA	NA	Kouleothrix	Kouleothrix aurantiaca
tomato	0.209143	28824	363832	Bacteria	Actinobacteria	Thermoleophilia	Solirubrobacterales	Solirubrobacteraceae	Solirubrobacter	Solirubrobacter soli
soil	0.19361	28670	77133	Bacteria	NA	NA	NA	NA	NA	uncultured bacterium
tomato	0.192006	28592	1803431	Bacteria	Acidobacteria	NA	NA	NA	NA	Acidobacteria bacterium 13_1_20CM_3_53_8
soil	0.195636	28577	77133	Bacteria	NA	NA	NA	NA	NA	uncultured bacterium
ruderals	0.17047	28563	674703	Bacteria	Proteobacteria	Alphaproteobacteria	Rhizobiales	Hyphomicrobiaceae	Rhodoplanes	Rhodoplanes sp. Z2-YC6860
soil	0.192435	28496	1032527	Bacteria	Verrucomicrobia	Verrucomicrobiae	Verrucomicrobiales	Verrucomicrobia subdivision 3	Pedosphaera	Pedosphaera parvula
ruderals	0.180601	28414	465721	Bacteria	Proteobacteria	Gammaproteobacteria	Nevskiales	Sinobacteraceae	Steroidobacter	Steroidobacter denitrificans
ruderals	0.170342	28367	171674	Bacteria	Proteobacteria	Alphaproteobacteria	Rhodospirillales	Rhodospirillaceae	Inquilinus	Inquilinus limosus
ruderals	0.171213	28341	35754	Bacteria	Actinobacteria	Actinobacteria	Micromonosporales	Micromonosporaceae	Dactylosporangium	Dactylosporangium aurantiacum
ruderals	0.169789	28275	77133	Bacteria	NA	NA	NA	NA	NA	uncultured bacterium
ruderals	0.170585	28237	1805166	Bacteria	Proteobacteria	Gammaproteobacteria	NA	NA	NA	Gammaproteobacteria bacterium 13_2_20CM_66_19
soil	0.207671	28233	1380390	Bacteria	Actinobacteria	Thermoleophilia	Solirubrobacterales	NA	NA	Solirubrobacterales bacterium URHD0059
tomato	0.189461	28213	1134474	Bacteria	Proteobacteria	Gammaproteobacteria	Cellvibrionales	Cellvibrionaceae	Cellvibrio	Cellvibrio sp. BR
tomato	0.166821	28091	363832	Bacteria	Actinobacteria	Thermoleophilia	Solirubrobacterales	Solirubrobacteraceae	Solirubrobacter	Solirubrobacter soli
soil	0.210689	28066	77133	Bacteria	NA	NA	NA	NA	NA	uncultured bacterium
ruderals	0.167354	28041	861299	Bacteria	Gemmatimonadetes	Gemmatimonadetes	Gemmatimonadales	Gemmatimonadaceae	Gemmatirosa	Gemmatirosa kalamazoonesis
ruderals	0.169141	27998	77133	Bacteria	NA	NA	NA	NA	NA	uncultured bacterium
ruderals	0.165194	27679	1298857	Bacteria	Actinobacteria	Thermoleophilia	Solirubrobacterales	Solirubrobacteraceae	Solirubrobacter	Solirubrobacter sp. URHD0082
ruderals	0.175326	27584	1298857	Bacteria	Actinobacteria	Thermoleophilia	Solirubrobacterales	Solirubrobacteraceae	Solirubrobacter	Solirubrobacter sp. URHD0082
ruderals	0.163594	27411	77133	Bacteria	NA	NA	NA	NA	NA	uncultured bacterium
soil	0.185061	27404	1797193	Bacteria	Acidobacteria	NA	NA	NA	NA	Acidobacteria bacterium RIFCSPLOWO2_12_FULL_67_14b
soil	0.187249	27352	191495	Bacteria	Actinobacteria	Thermoleophilia	Solirubrobacterales	Conexibacteraceae	Conexibacter	Conexibacter woesei
soil	0.200352	27238	1380347	Bacteria	Actinobacteria	Actinobacteria	Geodermatophilales	Geodermatophilaceae	NA	Geodermatophilaceae bacterium URHB0048
ruderals	0.228316	27210	947013	Bacteria	Bacteroidetes	Cytophagia	Cytophagales	NA	Chryseolinea	Chryseolinea serpens
soil	0.18263	27044	56	Bacteria	Proteobacteria	Deltaproteobacteria	Myxococcales	Polyangiaceae	Sorangium	Sorangium cellulosum
tomato	0.160544	27034	407019	Bacteria	Proteobacteria	Alphaproteobacteria	Sphingomonadales	Sphingomonadaceae	Sphingomonas	Sphingomonas astaxanthinifaciens
tomato	0.18815	27016	1813736	Bacteria	Acidobacteria	NA	NA	NA	NA	Acidobacteria bacterium DSM 100886
soil	0.195271	26874	1437360	Bacteria	Proteobacteria	Alphaproteobacteria	Rhizobiales	Bradyrhizobiaceae	Bradyrhizobium	Bradyrhizobium erythrophlei
soil	0.18397	26873	1797193	Bacteria	Acidobacteria	NA	NA	NA	NA	Acidobacteria bacterium RIFCSPLOWO2_12_FULL_67_14b
ruderals	0.160097	26825	35752	Bacteria	Actinobacteria	Actinobacteria	Micromonosporales	Micromonosporaceae	Actinoplanes	Actinoplanes philippinensis
ruderals	0.160659	26594	570835	Bacteria	Acidobacteria	Acidobacteriia	Acidobacteriales	Acidobacteriaceae	Edaphobacter	Edaphobacter aggregans
tomato	0.183909	26407	1803447	Bacteria	Acidobacteria	NA	NA	NA	NA	Acidobacteria bacterium 13_1_40CM_3_55_6
ruderals	0.159457	26395	56	Bacteria	Proteobacteria	Deltaproteobacteria	Myxococcales	Polyangiaceae	Sorangium	Sorangium cellulosum
soil	0.179945	26285	1803431	Bacteria	Acidobacteria	NA	NA	NA	NA	Acidobacteria bacterium 13_1_20CM_3_53_8
soil	0.192475	26167	454194	Bacteria	Acidobacteria	Blastocatellia	NA	NA	Pyrinomonas	Pyrinomonas methylaliphatogenes
soil	0.210435	26142	1797193	Bacteria	Acidobacteria	NA	NA	NA	NA	Acidobacteria bacterium RIFCSPLOWO2_12_FULL_67_14b
tomato	0.181987	26131	1380389	Bacteria	Proteobacteria	Alphaproteobacteria	Sphingomonadales	Sphingomonadaceae	Sphingomonas	Sphingomonas sp. URHD0057
soil	0.210242	26118	1380390	Bacteria	Actinobacteria	Thermoleophilia	Solirubrobacterales	NA	NA	Solirubrobacterales bacterium URHD0059
ruderals	0.15571	26090	56	Bacteria	Proteobacteria	Deltaproteobacteria	Myxococcales	Polyangiaceae	Sorangium	Sorangium cellulosum
tomato	0.181304	26033	550983	Bacteria	Bacteroidetes	Chitinophagia	Chitinophagales	Chitinophagaceae	Niastella	Niastella populi
soil	0.209139	25981	29539	Bacteria	Actinobacteria	Thermoleophilia	Thermoleophilales	Thermoleophilaceae	Thermoleophilum	Thermoleophilum album
tomato	0.154208	25967	454194	Bacteria	Acidobacteria	Blastocatellia	NA	NA	Pyrinomonas	Pyrinomonas methylaliphatogenes
ruderals	0.155606	25913	196914	Bacteria	Actinobacteria	Actinobacteria	Micromonosporales	Micromonosporaceae	Actinoplanes	Actinoplanes friuliensis
tomato	0.187738	25874	56	Bacteria	Proteobacteria	Deltaproteobacteria	Myxococcales	Polyangiaceae	Sorangium	Sorangium cellulosum
tomato	0.17488	25812	191495	Bacteria	Actinobacteria	Thermoleophilia	Solirubrobacterales	Conexibacteraceae	Conexibacter	Conexibacter woesei
tomato	0.174196	25711	1736464	Bacteria	Proteobacteria	Betaproteobacteria	Burkholderiales	Comamonadaceae	Pelomonas	Pelomonas sp. Root1444
soil	0.185593	25542	80816	Bacteria	Proteobacteria	Deltaproteobacteria	Myxococcales	Kofleriaceae	Haliangium	Haliangium ochraceum
soil	0.190885	25428	947013	Bacteria	Bacteroidetes	Cytophagia	Cytophagales	NA	Chryseolinea	Chryseolinea serpens
tomato	0.176541	25349	393310	Bacteria	Proteobacteria	Alphaproteobacteria	Rhodospirillales	Rhodospirillaceae	Skermanella	Skermanella aerolata
ruderals	0.16051	25253	191495	Bacteria	Actinobacteria	Thermoleophilia	Solirubrobacterales	Conexibacteraceae	Conexibacter	Conexibacter woesei
soil	0.189159	25198	688867	Bacteria	Bacteroidetes	Cytophagia	Cytophagales	Cytophagaceae	Ohtaekwangia	Ohtaekwangia koreensis
tomato	0.16871	25123	77133	Bacteria	NA	NA	NA	NA	NA	uncultured bacterium
soil	0.184604	25097	1797193	Bacteria	Acidobacteria	NA	NA	NA	NA	Acidobacteria bacterium RIFCSPLOWO2_12_FULL_67_14b
soil	0.182337	25094	888845	Bacteria	Proteobacteria	Deltaproteobacteria	Myxococcales	NA	Minicystis	Minicystis rosea
ruderals	0.159429	25083	77133	Bacteria	NA	NA	NA	NA	NA	uncultured bacterium
soil	0.170997	24978	1797182	Bacteria	Acidobacteria	NA	NA	NA	NA	Acidobacteria bacterium RIFCSPLOWO2_02_FULL_65_29
soil	0.1706	24920	1298857	Bacteria	Actinobacteria	Thermoleophilia	Solirubrobacterales	Solirubrobacteraceae	Solirubrobacter	Solirubrobacter sp. URHD0082
soil	0.168273	24918	1437360	Bacteria	Proteobacteria	Alphaproteobacteria	Rhizobiales	Bradyrhizobiaceae	Bradyrhizobium	Bradyrhizobium erythrophlei
soil	0.200188	24869	1803475	Bacteria	Actinobacteria	NA	NA	NA	NA	Actinobacteria bacterium 13_1_20CM_3_68_9
soil	0.170011	24834	1032527	Bacteria	Verrucomicrobia	Verrucomicrobiae	Verrucomicrobiales	Verrucomicrobia subdivision 3	Pedosphaera	Pedosphaera parvula
ruderals	0.14879	24778	674703	Bacteria	Proteobacteria	Alphaproteobacteria	Rhizobiales	Hyphomicrobiaceae	Rhodoplanes	Rhodoplanes sp. Z2-YC6860
soil	0.18443	24568	1813736	Bacteria	Acidobacteria	NA	NA	NA	NA	Acidobacteria bacterium DSM 100886
ruderals	0.204427	24363	688867	Bacteria	Bacteroidetes	Cytophagia	Cytophagales	Cytophagaceae	Ohtaekwangia	Ohtaekwangia koreensis
tomato	0.1692	24295	392409	Bacteria	Proteobacteria	Alphaproteobacteria	Sphingomonadales	Sphingomonadaceae	Sphingomonas	Sphingomonas jaspsi
ruderals	0.145673	24259	1380357	Bacteria	Proteobacteria	Alphaproteobacteria	Rhodospirillales	NA	NA	Rhodospirillales bacterium URHD0017
tomato	0.168692	24222	363832	Bacteria	Actinobacteria	Thermoleophilia	Solirubrobacterales	Solirubrobacteraceae	Solirubrobacter	Solirubrobacter soli
tomato	0.163844	24183	947013	Bacteria	Bacteroidetes	Cytophagia	Cytophagales	NA	Chryseolinea	Chryseolinea serpens
ruderals	0.145043	24154	1380353	Bacteria	Actinobacteria	Actinobacteria	Geodermatophilales	Geodermatophilaceae	NA	Geodermatophilaceae bacterium URHB0062
tomato	0.175236	24151	1736464	Bacteria	Proteobacteria	Betaproteobacteria	Burkholderiales	Comamonadaceae	Pelomonas	Pelomonas sp. Root1444
soil	0.164103	23971	332163	Bacteria	Acidobacteria	Solibacteres	Solibacterales	Solibacteraceae	Candidatus Solibacter	Candidatus Solibacter usitatus
soil	0.173858	23927	1267535	Bacteria	Acidobacteria	Acidobacteriia	Acidobacteriales	Acidobacteriaceae	NA	Acidobacteriaceae bacterium KBS 96
ruderals	0.151872	23894	1813736	Bacteria	Acidobacteria	NA	NA	NA	NA	Acidobacteria bacterium DSM 100886
soil	0.179077	23855	674703	Bacteria	Proteobacteria	Alphaproteobacteria	Rhizobiales	Hyphomicrobiaceae	Rhodoplanes	Rhodoplanes sp. Z2-YC6860
tomato	0.172951	23836	113565	Bacteria	Actinobacteria	Actinobacteria	Micromonosporales	Micromonosporaceae	Actinoplanes	Actinoplanes globisporus
tomato	0.14084	23716	1985174	Bacteria	Bacteroidetes	Chitinophagia	Chitinophagales	Chitinophagaceae	NA	Chitinophagaceae bacterium IBVUCB2
ruderals	0.150137	23621	1895833	Bacteria	Actinobacteria	Thermoleophilia	Solirubrobacterales	NA	NA	Solirubrobacterales bacterium 70-9
tomato	0.171311	23610	1797193	Bacteria	Acidobacteria	NA	NA	NA	NA	Acidobacteria bacterium RIFCSPLOWO2_12_FULL_67_14b
tomato	0.159941	23607	1985174	Bacteria	Bacteroidetes	Chitinophagia	Chitinophagales	Chitinophagaceae	NA	Chitinophagaceae bacterium IBVUCB2
tomato	0.163197	23433	1660163	Bacteria	Gemmatimonadetes	NA	NA	NA	NA	Gemmatimonadetes bacterium SCN 70-22
soil	0.175654	23399	1797501	Bacteria	Proteobacteria	Betaproteobacteria	NA	NA	NA	Betaproteobacteria bacterium RIFCSPLOWO2_12_FULL_65_14
tomato	0.169613	23376	77133	Bacteria	NA	NA	NA	NA	NA	uncultured bacterium
soil	0.171857	23364	77133	Bacteria	NA	NA	NA	NA	NA	uncultured bacterium
tomato	0.158152	23343	113565	Bacteria	Actinobacteria	Actinobacteria	Micromonosporales	Micromonosporaceae	Actinoplanes	Actinoplanes globisporus
ruderals	0.194887	23226	77133	Bacteria	NA	NA	NA	NA	NA	uncultured bacterium
soil	0.186632	23185	77133	Bacteria	NA	NA	NA	NA	NA	uncultured bacterium
ruderals	0.137825	22952	1617423	Bacteria	Acidobacteria	NA	NA	NA	NA	Acidobacteria bacterium OLB17
soil	0.168039	22845	113565	Bacteria	Actinobacteria	Actinobacteria	Micromonosporales	Micromonosporaceae	Actinoplanes	Actinoplanes globisporus
ruderals	0.13629	22836	1803431	Bacteria	Acidobacteria	NA	NA	NA	NA	Acidobacteria bacterium 13_1_20CM_3_53_8
ruderals	0.136021	22791	392409	Bacteria	Proteobacteria	Alphaproteobacteria	Sphingomonadales	Sphingomonadaceae	Sphingomonas	Sphingomonas jaspsi
tomato	0.152996	22783	1797193	Bacteria	Acidobacteria	NA	NA	NA	NA	Acidobacteria bacterium RIFCSPLOWO2_12_FULL_67_14b
tomato	0.134937	22722	1736584	Bacteria	Proteobacteria	Alphaproteobacteria	Sphingomonadales	Erythrobacteraceae	Altererythrobacter	Altererythrobacter sp. Root672
ruderals	0.155149	25682	588596	Eukaryota	Mucoromycota	Glomeromycetes	Glomerales	Glomeraceae	Rhizophagus	Rhizophagus irregularis
soil	0.164797	22680	77133	Bacteria	NA	NA	NA	NA	NA	uncultured bacterium
soil	0.152869	22637	1380390	Bacteria	Actinobacteria	Thermoleophilia	Solirubrobacterales	NA	NA	Solirubrobacterales bacterium URHD0059
ruderals	0.143329	22550	1797193	Bacteria	Acidobacteria	NA	NA	NA	NA	Acidobacteria bacterium RIFCSPLOWO2_12_FULL_67_14b
ruderals	0.136204	22546	1380390	Bacteria	Actinobacteria	Thermoleophilia	Solirubrobacterales	NA	NA	Solirubrobacterales bacterium URHD0059
soil	0.163591	22514	1391654	Bacteria	Proteobacteria	Deltaproteobacteria	Myxococcales	Labilitrichaceae	Labilithrix	Labilithrix luteola
soil	0.181102	22498	1813736	Bacteria	Acidobacteria	NA	NA	NA	NA	Acidobacteria bacterium DSM 100886
ruderals	0.135069	22493	68170	Bacteria	Actinobacteria	Actinobacteria	Pseudonocardiales	Pseudonocardiaceae	Lechevalieria	Lechevalieria aerocolonigenes
tomato	0.150988	22484	56	Bacteria	Proteobacteria	Deltaproteobacteria	Myxococcales	Polyangiaceae	Sorangium	Sorangium cellulosum
tomato	0.151181	22314	1660163	Bacteria	Gemmatimonadetes	NA	NA	NA	NA	Gemmatimonadetes bacterium SCN 70-22
soil	0.164038	22301	56438	Bacteria	Actinobacteria	Actinobacteria	Micromonosporales	Micromonosporaceae	Couchioplanes	Couchioplanes caeruleus
ruderals	0.133037	22291	113562	Bacteria	Actinobacteria	Actinobacteria	Micromonosporales	Micromonosporaceae	Actinoplanes	Actinoplanes derwentensis
tomato	0.132021	22231	947013	Bacteria	Bacteroidetes	Cytophagia	Cytophagales	NA	Chryseolinea	Chryseolinea serpens
ruderals	0.133764	22142	454194	Bacteria	Acidobacteria	Blastocatellia	NA	NA	Pyrinomonas	Pyrinomonas methylaliphatogenes
soil	0.151521	22133	1797501	Bacteria	Proteobacteria	Betaproteobacteria	NA	NA	NA	Betaproteobacteria bacterium RIFCSPLOWO2_12_FULL_65_14
ruderals	0.132409	22050	1380390	Bacteria	Actinobacteria	Thermoleophilia	Solirubrobacterales	NA	NA	Solirubrobacterales bacterium URHD0059
ruderals	0.183836	21909	674703	Bacteria	Proteobacteria	Alphaproteobacteria	Rhizobiales	Hyphomicrobiaceae	Rhodoplanes	Rhodoplanes sp. Z2-YC6860
tomato	0.147013	21892	1736464	Bacteria	Proteobacteria	Betaproteobacteria	Burkholderiales	Comamonadaceae	Pelomonas	Pelomonas sp. Root1444
soil	0.175331	21781	1803481	Bacteria	Actinobacteria	NA	NA	NA	NA	Actinobacteria bacterium 13_1_20CM_4_69_9
tomato	0.129212	21758	462367	Bacteria	Bacteroidetes	Chitinophagia	Chitinophagales	Chitinophagaceae	Flavisolibacter	Flavisolibacter ginsengisoli
soil	0.162104	21594	1797182	Bacteria	Acidobacteria	NA	NA	NA	NA	Acidobacteria bacterium RIFCSPLOWO2_02_FULL_65_29
ruderals	0.128746	21572	191495	Bacteria	Actinobacteria	Thermoleophilia	Solirubrobacterales	Conexibacteraceae	Conexibacter	Conexibacter woesei
tomato	0.145104	21417	137265	Bacteria	Actinobacteria	Actinobacteria	Micromonosporales	Micromonosporaceae	Asanoa	Asanoa ishikariensis
soil	0.16064	21399	1380357	Bacteria	Proteobacteria	Alphaproteobacteria	Rhodospirillales	NA	NA	Rhodospirillales bacterium URHD0017
soil	0.155423	21390	1380389	Bacteria	Proteobacteria	Alphaproteobacteria	Sphingomonadales	Sphingomonadaceae	Sphingomonas	Sphingomonas sp. URHD0057
tomato	0.144412	21315	56	Bacteria	Proteobacteria	Deltaproteobacteria	Myxococcales	Polyangiaceae	Sorangium	Sorangium cellulosum
ruderals	0.127141	21303	1904640	Bacteria	Proteobacteria	Betaproteobacteria	NA	NA	NA	Betaproteobacteria bacterium GR16-43
soil	0.154631	21281	1803507	Bacteria	Proteobacteria	Alphaproteobacteria	NA	NA	NA	Alphaproteobacteria bacterium 13_2_20CM_2_64_7
soil	0.15413	21212	1895795	Bacteria	Proteobacteria	Deltaproteobacteria	Myxococcales	NA	NA	Myxococcales bacterium 68-20
ruderals	0.134736	21198	573321	Bacteria	Bacteroidetes	Chitinophagia	Chitinophagales	Chitinophagaceae	Chitinophaga	Chitinophaga rupis
tomato	0.147569	21189	1396141	Bacteria	Verrucomicrobia	Verrucomicrobiae	Verrucomicrobiales	Verrucomicrobiaceae	Haloferula	Haloferula sp. BvORR071
ruderals	0.127202	21183	688867	Bacteria	Bacteroidetes	Cytophagia	Cytophagales	Cytophagaceae	Ohtaekwangia	Ohtaekwangia koreensis
ruderals	0.127928	21176	1895833	Bacteria	Actinobacteria	Thermoleophilia	Solirubrobacterales	NA	NA	Solirubrobacterales bacterium 70-9
tomato	0.125138	21072	1396141	Bacteria	Verrucomicrobia	Verrucomicrobiae	Verrucomicrobiales	Verrucomicrobiaceae	Haloferula	Haloferula sp. BvORR071
tomato	0.146399	21021	888845	Bacteria	Proteobacteria	Deltaproteobacteria	Myxococcales	NA	Minicystis	Minicystis rosea
soil	0.157652	21001	861299	Bacteria	Gemmatimonadetes	Gemmatimonadetes	Gemmatimonadales	Gemmatimonadaceae	Gemmatirosa	Gemmatirosa kalamazoonesis
ruderals	0.125791	20948	1549810	Bacteria	Proteobacteria	Alphaproteobacteria	Rhizobiales	Methylobacteriaceae	Microvirga	Microvirga sp. BSC39
ruderals	0.125551	20908	1798228	Bacteria	Actinobacteria	Actinobacteria	Geodermatophilales	Geodermatophilaceae	Blastococcus	Blastococcus sp. DSM 46838
ruderals	0.175193	20879	1298857	Bacteria	Actinobacteria	Thermoleophilia	Solirubrobacterales	Solirubrobacteraceae	Solirubrobacter	Solirubrobacter sp. URHD0082
tomato	0.141343	20862	1797182	Bacteria	Acidobacteria	NA	NA	NA	NA	Acidobacteria bacterium RIFCSPLOWO2_02_FULL_65_29
ruderals	0.125868	20835	1895709	Bacteria	Proteobacteria	Alphaproteobacteria	NA	NA	NA	Alphaproteobacteria bacterium 64-11
ruderals	0.1253	20741	1703345	Bacteria	Bacteroidetes	Chitinophagia	Chitinophagales	Chitinophagaceae	Niastella	Niastella vici
ruderals	0.123751	20735	543632	Bacteria	Actinobacteria	Actinobacteria	Micromonosporales	Micromonosporaceae	Actinoplanes	Actinoplanes subtropicus
ruderals	0.123422	20680	1985174	Bacteria	Bacteroidetes	Chitinophagia	Chitinophagales	Chitinophagaceae	NA	Chitinophagaceae bacterium IBVUCB2
tomato	0.149848	20652	543632	Bacteria	Actinobacteria	Actinobacteria	Micromonosporales	Micromonosporaceae	Actinoplanes	Actinoplanes subtropicus
soil	0.154905	20635	1380390	Bacteria	Actinobacteria	Thermoleophilia	Solirubrobacterales	NA	NA	Solirubrobacterales bacterium URHD0059
soil	0.141108	20612	1380357	Bacteria	Proteobacteria	Alphaproteobacteria	Rhodospirillales	NA	NA	Rhodospirillales bacterium URHD0017
ruderals	0.122509	20527	1813736	Bacteria	Acidobacteria	NA	NA	NA	NA	Acidobacteria bacterium DSM 100886
tomato	0.138362	20422	35752	Bacteria	Actinobacteria	Actinobacteria	Micromonosporales	Micromonosporaceae	Actinoplanes	Actinoplanes philippinensis
soil	0.136952	20280	191863	Bacteria	Verrucomicrobia	Spartobacteria	Chthoniobacterales	Chthoniobacteraceae	Chthoniobacter	Chthoniobacter flavus
soil	0.136621	20231	433660	Bacteria	Actinobacteria	Actinobacteria	Propionibacteriales	Nocardioidaceae	Nocardioides	Nocardioides halotolerans
ruderals	0.121287	20198	947013	Bacteria	Bacteroidetes	Cytophagia	Cytophagales	NA	Chryseolinea	Chryseolinea serpens
ruderals	0.135117	21258	588596	Eukaryota	Mucoromycota	Glomeromycetes	Glomerales	Glomeraceae	Rhizophagus	Rhizophagus irregularis
soil	0.137233	20046	1813736	Bacteria	Acidobacteria	NA	NA	NA	NA	Acidobacteria bacterium DSM 100886
tomato	0.145335	20030	674703	Bacteria	Proteobacteria	Alphaproteobacteria	Rhizobiales	Hyphomicrobiaceae	Rhodoplanes	Rhodoplanes sp. Z2-YC6860
soil	0.146664	19939	1861	Bacteria	Actinobacteria	Actinobacteria	Geodermatophilales	Geodermatophilaceae	Geodermatophilus	Geodermatophilus obscurus
tomato	0.117964	19864	1660163	Bacteria	Gemmatimonadetes	NA	NA	NA	NA	Gemmatimonadetes bacterium SCN 70-22
soil	0.134123	19861	1803507	Bacteria	Proteobacteria	Alphaproteobacteria	NA	NA	NA	Alphaproteobacteria bacterium 13_2_20CM_2_64_7
soil	0.133744	19805	1797182	Bacteria	Acidobacteria	NA	NA	NA	NA	Acidobacteria bacterium RIFCSPLOWO2_02_FULL_65_29
ruderals	0.118194	19804	113565	Bacteria	Actinobacteria	Actinobacteria	Micromonosporales	Micromonosporaceae	Actinoplanes	Actinoplanes globisporus
ruderals	0.11944	19771	1380357	Bacteria	Proteobacteria	Alphaproteobacteria	Rhodospirillales	NA	NA	Rhodospirillales bacterium URHD0017
tomato	0.133938	19769	1396141	Bacteria	Verrucomicrobia	Verrucomicrobiae	Verrucomicrobiales	Verrucomicrobiaceae	Haloferula	Haloferula sp. BvORR071
soil	0.133413	19756	1813736	Bacteria	Acidobacteria	NA	NA	NA	NA	Acidobacteria bacterium DSM 100886
tomato	0.117181	19732	1298857	Bacteria	Actinobacteria	Thermoleophilia	Solirubrobacterales	Solirubrobacteraceae	Solirubrobacter	Solirubrobacter sp. URHD0082
soil	0.13317	19720	1267535	Bacteria	Acidobacteria	Acidobacteriia	Acidobacteriales	Acidobacteriaceae	NA	Acidobacteriaceae bacterium KBS 96
tomato	0.116646	19642	550983	Bacteria	Bacteroidetes	Chitinophagia	Chitinophagales	Chitinophagaceae	Niastella	Niastella populi
ruderals	0.117084	19618	1630693	Bacteria	Planctomycetes	Planctomycetia	Planctomycetales	Gemmataceae	Gemmata	Gemmata sp. SH-PL17
soil	0.133886	19557	1895795	Bacteria	Proteobacteria	Deltaproteobacteria	Myxococcales	NA	NA	Myxococcales bacterium 68-20
tomato	0.136084	19540	1032527	Bacteria	Verrucomicrobia	Verrucomicrobiae	Verrucomicrobiales	Verrucomicrobia subdivision 3	Pedosphaera	Pedosphaera parvula
tomato	0.132346	19708	497727	Archaea	Thaumarchaeota	Nitrososphaeria	Nitrososphaerales	Nitrososphaeraceae	Nitrososphaera	Candidatus Nitrososphaera gargensis
tomato	0.132292	19526	392409	Bacteria	Proteobacteria	Alphaproteobacteria	Sphingomonadales	Sphingomonadaceae	Sphingomonas	Sphingomonas jaspsi
soil	0.14649	19514	196914	Bacteria	Actinobacteria	Actinobacteria	Micromonosporales	Micromonosporaceae	Actinoplanes	Actinoplanes friuliensis
tomato	0.115874	19512	1660160	Bacteria	Acidobacteria	NA	NA	NA	NA	Acidobacteria bacterium SCN 69-37
ruderals	0.123708	19463	1380357	Bacteria	Proteobacteria	Alphaproteobacteria	Rhodospirillales	NA	NA	Rhodospirillales bacterium URHD0017
ruderals	0.117447	19441	363277	Bacteria	Chloroflexi	Ktedonobacteria	Ktedonobacterales	Ktedonobacteraceae	Ktedonobacter	Ktedonobacter racemifer
ruderals	0.117386	19431	658062	Bacteria	Acidobacteria	Acidobacteriia	Acidobacteriales	Acidobacteriaceae	Candidatus Koribacter	Candidatus Koribacter versatilis
tomato	0.130224	19392	1380390	Bacteria	Actinobacteria	Thermoleophilia	Solirubrobacterales	NA	NA	Solirubrobacterales bacterium URHD0059
tomato	0.130876	19317	183795	Bacteria	Proteobacteria	Gammaproteobacteria	Pseudomonadales	Pseudomonadaceae	Pseudomonas	Pseudomonas mediterranea
tomato	0.134162	19264	462367	Bacteria	Bacteroidetes	Chitinophagia	Chitinophagales	Chitinophagaceae	Flavisolibacter	Flavisolibacter ginsengisoli
tomato	0.114366	19258	688867	Bacteria	Bacteroidetes	Cytophagia	Cytophagales	Cytophagaceae	Ohtaekwangia	Ohtaekwangia koreensis
ruderals	0.121979	19191	113565	Bacteria	Actinobacteria	Actinobacteria	Micromonosporales	Micromonosporaceae	Actinoplanes	Actinoplanes globisporus
soil	0.140934	19160	1813736	Bacteria	Acidobacteria	NA	NA	NA	NA	Acidobacteria bacterium DSM 100886
ruderals	0.114333	19157	391953	Bacteria	Proteobacteria	Betaproteobacteria	Burkholderiales	NA	Aquincola	Aquincola tertiaricarbonis
ruderals	0.121312	19086	1805166	Bacteria	Proteobacteria	Gammaproteobacteria	NA	NA	NA	Gammaproteobacteria bacterium 13_2_20CM_66_19
ruderals	0.114202	19018	1630693	Bacteria	Planctomycetes	Planctomycetia	Planctomycetales	Gemmataceae	Gemmata	Gemmata sp. SH-PL17
soil	0.139823	19009	29539	Bacteria	Actinobacteria	Thermoleophilia	Thermoleophilales	Thermoleophilaceae	Thermoleophilum	Thermoleophilum album
ruderals	0.113318	18987	1797193	Bacteria	Acidobacteria	NA	NA	NA	NA	Acidobacteria bacterium RIFCSPLOWO2_12_FULL_67_14b
tomato	0.128579	18978	543632	Bacteria	Actinobacteria	Actinobacteria	Micromonosporales	Micromonosporaceae	Actinoplanes	Actinoplanes subtropicus
tomato	0.13747	18946	1985174	Bacteria	Bacteroidetes	Chitinophagia	Chitinophagales	Chitinophagaceae	NA	Chitinophagaceae bacterium IBVUCB2
tomato	0.112151	18885	186479	Bacteria	Chloroflexi	NA	NA	NA	Kouleothrix	Kouleothrix aurantiaca
soil	0.138734	18861	543632	Bacteria	Actinobacteria	Actinobacteria	Micromonosporales	Micromonosporaceae	Actinoplanes	Actinoplanes subtropicus
ruderals	0.113755	18830	1803507	Bacteria	Proteobacteria	Alphaproteobacteria	NA	NA	NA	Alphaproteobacteria bacterium 13_2_20CM_2_64_7
ruderals	0.119354	18778	550983	Bacteria	Bacteroidetes	Chitinophagia	Chitinophagales	Chitinophagaceae	Niastella	Niastella populi
ruderals	0.112514	18737	1882682	Bacteria	Proteobacteria	Alphaproteobacteria	Rhizobiales	Methylobacteriaceae	Microvirga	Microvirga ossetica
ruderals	0.15675	18681	1797193	Bacteria	Acidobacteria	NA	NA	NA	NA	Acidobacteria bacterium RIFCSPLOWO2_12_FULL_67_14b
tomato	0.12654	18677	1380357	Bacteria	Proteobacteria	Alphaproteobacteria	Rhodospirillales	NA	NA	Rhodospirillales bacterium URHD0017
soil	0.126889	18535	588596	Eukaryota	Mucoromycota	Glomeromycetes	Glomerales	Glomeraceae	Rhizophagus	Rhizophagus irregularis
soil	0.150336	18676	454194	Bacteria	Acidobacteria	Blastocatellia	NA	NA	Pyrinomonas	Pyrinomonas methylaliphatogenes
ruderals	0.118521	18647	1895795	Bacteria	Proteobacteria	Deltaproteobacteria	Myxococcales	NA	NA	Myxococcales bacterium 68-20
soil	0.137138	18644	1866	Bacteria	Actinobacteria	Actinobacteria	Micromonosporales	Micromonosporaceae	Actinoplanes	Actinoplanes missouriensis
ruderals	0.118324	18616	888845	Bacteria	Proteobacteria	Deltaproteobacteria	Myxococcales	NA	Minicystis	Minicystis rosea
tomato	0.134923	18595	1736528	Bacteria	Proteobacteria	Betaproteobacteria	Burkholderiales	NA	Rhizobacter	Rhizobacter sp. Root404
tomato	0.110399	18590	113565	Bacteria	Actinobacteria	Actinobacteria	Micromonosporales	Micromonosporaceae	Actinoplanes	Actinoplanes globisporus
soil	0.12717	18576	1805166	Bacteria	Proteobacteria	Gammaproteobacteria	NA	NA	NA	Gammaproteobacteria bacterium 13_2_20CM_66_19
ruderals	0.111247	18526	1380347	Bacteria	Actinobacteria	Actinobacteria	Geodermatophilales	Geodermatophilaceae	NA	Geodermatophilaceae bacterium URHB0048
soil	0.125026	18514	80816	Bacteria	Proteobacteria	Deltaproteobacteria	Myxococcales	Kofleriaceae	Haliangium	Haliangium ochraceum
ruderals	0.111448	18448	551947	Bacteria	Proteobacteria	Alphaproteobacteria	Rhizobiales	Bradyrhizobiaceae	Bradyrhizobium	Bradyrhizobium sp. STM 3843
ruderals	0.11699	18406	433660	Bacteria	Actinobacteria	Actinobacteria	Propionibacteriales	Nocardioidaceae	Nocardioides	Nocardioides halotolerans
ruderals	0.110473	18397	392409	Bacteria	Proteobacteria	Alphaproteobacteria	Sphingomonadales	Sphingomonadaceae	Sphingomonas	Sphingomonas jaspsi
tomato	0.123522	18394	1813736	Bacteria	Acidobacteria	NA	NA	NA	NA	Acidobacteria bacterium DSM 100886
ruderals	0.11031	18370	454194	Bacteria	Acidobacteria	Blastocatellia	NA	NA	Pyrinomonas	Pyrinomonas methylaliphatogenes
tomato	0.108849	18329	1736464	Bacteria	Proteobacteria	Betaproteobacteria	Burkholderiales	Comamonadaceae	Pelomonas	Pelomonas sp. Root1444
soil	0.146794	18236	1797182	Bacteria	Acidobacteria	NA	NA	NA	NA	Acidobacteria bacterium RIFCSPLOWO2_02_FULL_65_29
ruderals	0.108711	18215	407019	Bacteria	Proteobacteria	Alphaproteobacteria	Sphingomonadales	Sphingomonadaceae	Sphingomonas	Sphingomonas astaxanthinifaciens
soil	0.132208	18195	1803453	Bacteria	Acidobacteria	NA	NA	NA	NA	Acidobacteria bacterium 13_1_40CM_4_58_4
ruderals	0.11528	18137	75922	Bacteria	Actinobacteria	Actinobacteria	Corynebacteriales	Mycobacteriaceae	Mycobacterium	Mycobacterium tusciae
ruderals	0.109454	18118	1803447	Bacteria	Acidobacteria	NA	NA	NA	NA	Acidobacteria bacterium 13_1_40CM_3_55_6
tomato	0.122691	18109	332163	Bacteria	Acidobacteria	Solibacteres	Solibacterales	Solibacteraceae	Candidatus Solibacter	Candidatus Solibacter usitatus
soil	0.123863	18093	1380390	Bacteria	Actinobacteria	Thermoleophilia	Solirubrobacterales	NA	NA	Solirubrobacterales bacterium URHD0059
ruderals	0.108563	18079	1235591	Bacteria	Proteobacteria	Alphaproteobacteria	Rhizobiales	NA	Pseudorhodoplanes	Pseudorhodoplanes sinuspersici
soil	0.130995	18028	1803470	Bacteria	Acidobacteria	Acidobacteriia	Acidobacteriales	NA	NA	Acidobacteriales bacterium 13_2_20CM_55_8
tomato	0.122027	18011	1660160	Bacteria	Acidobacteria	NA	NA	NA	NA	Acidobacteria bacterium SCN 69-37
soil	0.144887	17999	1797203	Bacteria	Actinobacteria	NA	NA	NA	NA	Actinobacteria bacterium RBG_16_68_12
ruderals	0.107957	17978	420324	Bacteria	Proteobacteria	Alphaproteobacteria	Rhizobiales	Methylobacteriaceae	Microvirga	Microvirga lupini
ruderals	0.114155	17960	1437360	Bacteria	Proteobacteria	Alphaproteobacteria	Rhizobiales	Bradyrhizobiaceae	Bradyrhizobium	Bradyrhizobium erythrophlei
ruderals	0.150683	17958	191495	Bacteria	Actinobacteria	Thermoleophilia	Solirubrobacterales	Conexibacteraceae	Conexibacter	Conexibacter woesei
soil	0.134554	17924	454194	Bacteria	Acidobacteria	Blastocatellia	NA	NA	Pyrinomonas	Pyrinomonas methylaliphatogenes
soil	0.129883	17875	1797238	Bacteria	Proteobacteria	Deltaproteobacteria	Myxococcales	Anaeromyxobacteraceae	Anaeromyxobacter	Anaeromyxobacter sp. RBG_16_69_14
soil	0.13132	17853	1881103	Bacteria	Actinobacteria	Actinobacteria	Geodermatophilales	Geodermatophilaceae	Geodermatophilus	Geodermatophilus sp. DSM 45219
soil	0.122015	17823	465721	Bacteria	Proteobacteria	Gammaproteobacteria	Nevskiales	Sinobacteraceae	Steroidobacter	Steroidobacter denitrificans
ruderals	0.107424	17782	540746	Bacteria	Proteobacteria	Gammaproteobacteria	Xanthomonadales	Rhodanobacteraceae	Rudaea	Rudaea cellulosilytica
tomato	0.119379	17777	29539	Bacteria	Actinobacteria	Thermoleophilia	Thermoleophilales	Thermoleophilaceae	Thermoleophilum	Thermoleophilum album
soil	0.130754	17776	1904967	Bacteria	Actinobacteria	Actinobacteria	Pseudonocardiales	Pseudonocardiaceae	Pseudonocardia	Pseudonocardia sp. CNS-004
soil	0.121686	17775	1803507	Bacteria	Proteobacteria	Alphaproteobacteria	NA	NA	NA	Alphaproteobacteria bacterium 13_2_20CM_2_64_7
soil	0.130327	17718	1550231	Bacteria	Actinobacteria	Actinobacteria	Geodermatophilales	Geodermatophilaceae	Blastococcus	Blastococcus sp. DSM 44268
tomato	0.128538	17715	1803431	Bacteria	Acidobacteria	NA	NA	NA	NA	Acidobacteria bacterium 13_1_20CM_3_53_8
tomato	0.105036	17687	1492898	Bacteria	Bacteroidetes	Chitinophagia	Chitinophagales	Chitinophagaceae	Flavisolibacter	Flavisolibacter sp. LCS9
tomato	0.104953	17673	1895753	Bacteria	Proteobacteria	Alphaproteobacteria	Rhizobiales	Hyphomicrobiaceae	Devosia	Devosia sp. 66-22
tomato	0.128182	17666	1298857	Bacteria	Actinobacteria	Thermoleophilia	Solirubrobacterales	Solirubrobacteraceae	Solirubrobacter	Solirubrobacter sp. URHD0082
soil	0.120817	17648	1630693	Bacteria	Planctomycetes	Planctomycetia	Planctomycetales	Gemmataceae	Gemmata	Gemmata sp. SH-PL17
tomato	0.122824	17636	1895838	Bacteria	Bacteroidetes	Sphingobacteriia	Sphingobacteriales	NA	NA	Sphingobacteriales bacterium 44-61
tomato	0.127413	17560	1869	Bacteria	Actinobacteria	Actinobacteria	Micromonosporales	Micromonosporaceae	Actinoplanes	Actinoplanes utahensis
soil	0.11855	17555	1617423	Bacteria	Acidobacteria	NA	NA	NA	NA	Acidobacteria bacterium OLB17
soil	0.128893	17523	1549810	Bacteria	Proteobacteria	Alphaproteobacteria	Rhizobiales	Methylobacteriaceae	Microvirga	Microvirga sp. BSC39
tomato	0.126912	17491	332163	Bacteria	Acidobacteria	Solibacteres	Solibacterales	Solibacteraceae	Candidatus Solibacter	Candidatus Solibacter usitatus
soil	0.12862	17486	674703	Bacteria	Proteobacteria	Alphaproteobacteria	Rhizobiales	Hyphomicrobiaceae	Rhodoplanes	Rhodoplanes sp. Z2-YC6860
soil	0.13104	17456	1803507	Bacteria	Proteobacteria	Alphaproteobacteria	NA	NA	NA	Alphaproteobacteria bacterium 13_2_20CM_2_64_7
tomato	0.121271	17413	113565	Bacteria	Actinobacteria	Actinobacteria	Micromonosporales	Micromonosporaceae	Actinoplanes	Actinoplanes globisporus
ruderals	0.103686	17373	1703345	Bacteria	Bacteroidetes	Chitinophagia	Chitinophagales	Chitinophagaceae	Niastella	Niastella vici
tomato	0.116538	17354	550983	Bacteria	Bacteroidetes	Chitinophagia	Chitinophagales	Chitinophagaceae	Niastella	Niastella populi
soil	0.139099	17280	1660163	Bacteria	Gemmatimonadetes	NA	NA	NA	NA	Gemmatimonadetes bacterium SCN 70-22
tomato	0.117061	17278	465721	Bacteria	Proteobacteria	Gammaproteobacteria	Nevskiales	Sinobacteraceae	Steroidobacter	Steroidobacter denitrificans
ruderals	0.144952	17275	1380357	Bacteria	Proteobacteria	Alphaproteobacteria	Rhodospirillales	NA	NA	Rhodospirillales bacterium URHD0017
ruderals	0.1446	17233	1805166	Bacteria	Proteobacteria	Gammaproteobacteria	NA	NA	NA	Gammaproteobacteria bacterium 13_2_20CM_66_19
tomato	0.119627	17177	1492898	Bacteria	Bacteroidetes	Chitinophagia	Chitinophagales	Chitinophagaceae	Flavisolibacter	Flavisolibacter sp. LCS9
ruderals	0.103745	17173	171674	Bacteria	Proteobacteria	Alphaproteobacteria	Rhodospirillales	Rhodospirillaceae	Inquilinus	Inquilinus limosus
ruderals	0.109019	17152	1617423	Bacteria	Acidobacteria	NA	NA	NA	NA	Acidobacteria bacterium OLB17
ruderals	0.102355	17150	550983	Bacteria	Bacteroidetes	Chitinophagia	Chitinophagales	Chitinophagaceae	Niastella	Niastella populi
soil	0.124506	17135	1803466	Bacteria	Acidobacteria	NA	NA	NA	NA	Acidobacteria bacterium 13_2_20CM_58_27
soil	0.115626	17122	1895795	Bacteria	Proteobacteria	Deltaproteobacteria	Myxococcales	NA	NA	Myxococcales bacterium 68-20
tomato	0.12422	17120	392409	Bacteria	Proteobacteria	Alphaproteobacteria	Sphingomonadales	Sphingomonadaceae	Sphingomonas	Sphingomonas jaspsi
ruderals	0.14356	17109	196914	Bacteria	Actinobacteria	Actinobacteria	Micromonosporales	Micromonosporaceae	Actinoplanes	Actinoplanes friuliensis
ruderals	0.102612	17088	1492898	Bacteria	Bacteroidetes	Chitinophagia	Chitinophagales	Chitinophagaceae	Flavisolibacter	Flavisolibacter sp. LCS9
soil	0.125678	17086	1803475	Bacteria	Actinobacteria	NA	NA	NA	NA	Actinobacteria bacterium 13_1_20CM_3_68_9
ruderals	0.143249	17072	1813736	Bacteria	Acidobacteria	NA	NA	NA	NA	Acidobacteria bacterium DSM 100886
ruderals	0.103129	17071	639030	Bacteria	Acidobacteria	Acidobacteriia	Acidobacteriales	Acidobacteriaceae	NA	Acidobacteria bacterium KBS 146
tomato	0.114584	17063	191579	Bacteria	Bacteroidetes	Flavobacteriia	Flavobacteriales	Crocinitomicaceae	Fluviicola	Fluviicola taffensis
soil	0.114789	16998	1380389	Bacteria	Proteobacteria	Alphaproteobacteria	Sphingomonadales	Sphingomonadaceae	Sphingomonas	Sphingomonas sp. URHD0057
tomato	0.11406	16985	1660163	Bacteria	Gemmatimonadetes	NA	NA	NA	NA	Gemmatimonadetes bacterium SCN 70-22
tomato	0.117865	16924	1736528	Bacteria	Proteobacteria	Betaproteobacteria	Burkholderiales	NA	Rhizobacter	Rhizobacter sp. Root404
tomato	0.100362	16900	543632	Bacteria	Actinobacteria	Actinobacteria	Micromonosporales	Micromonosporaceae	Actinoplanes	Actinoplanes subtropicus
ruderals	0.101435	16892	1895833	Bacteria	Actinobacteria	Thermoleophilia	Solirubrobacterales	NA	NA	Solirubrobacterales bacterium 70-9
soil	0.124126	16875	1797501	Bacteria	Proteobacteria	Betaproteobacteria	NA	NA	NA	Betaproteobacteria bacterium RIFCSPLOWO2_12_FULL_65_14
tomato	0.100048	16847	119532	Bacteria	Cyanobacteria	NA	Oscillatoriales	Microcoleaceae	Microcoleus	Microcoleus vaginatus
tomato	0.117294	16842	196914	Bacteria	Actinobacteria	Actinobacteria	Micromonosporales	Micromonosporaceae	Actinoplanes	Actinoplanes friuliensis
tomato	0.113053	16835	1703345	Bacteria	Bacteroidetes	Chitinophagia	Chitinophagales	Chitinophagaceae	Niastella	Niastella vici
soil	0.11484	16775	68170	Bacteria	Actinobacteria	Actinobacteria	Pseudonocardiales	Pseudonocardiaceae	Lechevalieria	Lechevalieria aerocolonigenes
ruderals	0.10122	16755	1630693	Bacteria	Planctomycetes	Planctomycetia	Planctomycetales	Gemmataceae	Gemmata	Gemmata sp. SH-PL17
tomato	0.121558	16753	1895795	Bacteria	Proteobacteria	Deltaproteobacteria	Myxococcales	NA	NA	Myxococcales bacterium 68-20
ruderals	0.106191	16707	80816	Bacteria	Proteobacteria	Deltaproteobacteria	Myxococcales	Kofleriaceae	Haliangium	Haliangium ochraceum
ruderals	0.105956	16670	191863	Bacteria	Verrucomicrobia	Spartobacteria	Chthoniobacterales	Chthoniobacteraceae	Chthoniobacter	Chthoniobacter flavus
tomato	0.111938	16669	454194	Bacteria	Acidobacteria	Blastocatellia	NA	NA	Pyrinomonas	Pyrinomonas methylaliphatogenes
tomato	0.111932	16668	688867	Bacteria	Bacteroidetes	Cytophagia	Cytophagales	Cytophagaceae	Ohtaekwangia	Ohtaekwangia koreensis
soil	0.120778	16622	1904640	Bacteria	Proteobacteria	Betaproteobacteria	NA	NA	NA	Betaproteobacteria bacterium GR16-43
ruderals	0.098875	16567	462367	Bacteria	Bacteroidetes	Chitinophagia	Chitinophagales	Chitinophagaceae	Flavisolibacter	Flavisolibacter ginsengisoli
tomato	0.115268	16551	332163	Bacteria	Acidobacteria	Solibacteres	Solibacterales	Solibacteraceae	Candidatus Solibacter	Candidatus Solibacter usitatus
ruderals	0.099951	16545	1803434	Bacteria	Acidobacteria	NA	NA	NA	NA	Acidobacteria bacterium 13_1_20CM_4_56_7
ruderals	0.099273	16532	1895753	Bacteria	Proteobacteria	Alphaproteobacteria	Rhizobiales	Hyphomicrobiaceae	Devosia	Devosia sp. 66-22
soil	0.113067	16516	1799662	Bacteria	Proteobacteria	Betaproteobacteria	NA	NA	NA	Betaproteobacteria bacterium SCGC AG-212-J23
ruderals	0.098553	16513	191863	Bacteria	Verrucomicrobia	Spartobacteria	Chthoniobacterales	Chthoniobacteraceae	Chthoniobacter	Chthoniobacter flavus
ruderals	0.098481	16501	1437360	Bacteria	Proteobacteria	Alphaproteobacteria	Rhizobiales	Bradyrhizobiaceae	Bradyrhizobium	Bradyrhizobium erythrophlei
ruderals	0.098757	16446	113565	Bacteria	Actinobacteria	Actinobacteria	Micromonosporales	Micromonosporaceae	Actinoplanes	Actinoplanes globisporus
tomato	0.097441	16408	1895838	Bacteria	Bacteroidetes	Sphingobacteriia	Sphingobacteriales	NA	NA	Sphingobacteriales bacterium 44-61
soil	0.122483	16316	465721	Bacteria	Proteobacteria	Gammaproteobacteria	Nevskiales	Sinobacteraceae	Steroidobacter	Steroidobacter denitrificans
tomato	0.110469	16305	550983	Bacteria	Bacteroidetes	Chitinophagia	Chitinophagales	Chitinophagaceae	Niastella	Niastella populi
ruderals	0.103578	16296	1895838	Bacteria	Bacteroidetes	Sphingobacteriia	Sphingobacteriales	NA	NA	Sphingobacteriales bacterium 44-61
soil	0.119801	16287	138336	Bacteria	Actinobacteria	Actinobacteria	Geodermatophilales	Geodermatophilaceae	Blastococcus	Blastococcus saxobsidens
soil	0.11975	16280	1660163	Bacteria	Gemmatimonadetes	NA	NA	NA	NA	Gemmatimonadetes bacterium SCN 70-22
soil	0.11825	16274	363832	Bacteria	Actinobacteria	Thermoleophilia	Solirubrobacterales	Solirubrobacteraceae	Solirubrobacter	Solirubrobacter soli
soil	0.118046	16246	191495	Bacteria	Actinobacteria	Thermoleophilia	Solirubrobacterales	Conexibacteraceae	Conexibacter	Conexibacter woesei
soil	0.117857	16220	1298857	Bacteria	Actinobacteria	Thermoleophilia	Solirubrobacterales	Solirubrobacteraceae	Solirubrobacter	Solirubrobacter sp. URHD0082
soil	0.109535	16220	225324	Bacteria	Proteobacteria	Alphaproteobacteria	Rhodospirillales	NA	Enhydrobacter	Enhydrobacter aerosaccus
soil	0.117821	16215	1630693	Bacteria	Planctomycetes	Planctomycetia	Planctomycetales	Gemmataceae	Gemmata	Gemmata sp. SH-PL17
soil	0.117719	16201	1805166	Bacteria	Proteobacteria	Gammaproteobacteria	NA	NA	NA	Gammaproteobacteria bacterium 13_2_20CM_66_19
tomato	0.117436	16185	888845	Bacteria	Proteobacteria	Deltaproteobacteria	Myxococcales	NA	Minicystis	Minicystis rosea
soil	0.119021	16181	1895833	Bacteria	Actinobacteria	Thermoleophilia	Solirubrobacterales	NA	NA	Solirubrobacterales bacterium 70-9
tomato	0.108594	16171	1855519	Bacteria	Proteobacteria	Alphaproteobacteria	Sphingomonadales	Sphingomonadaceae	Sphingobium	Sphingobium sp. EP60837
ruderals	0.135278	16122	1032527	Bacteria	Verrucomicrobia	Verrucomicrobiae	Verrucomicrobiales	Verrucomicrobia subdivision 3	Pedosphaera	Pedosphaera parvula
soil	0.120951	16112	1032527	Bacteria	Verrucomicrobia	Verrucomicrobiae	Verrucomicrobiales	Verrucomicrobia subdivision 3	Pedosphaera	Pedosphaera parvula
soil	0.108724	16100	888845	Bacteria	Proteobacteria	Deltaproteobacteria	Myxococcales	NA	Minicystis	Minicystis rosea
soil	0.10865	16089	1895709	Bacteria	Proteobacteria	Alphaproteobacteria	NA	NA	NA	Alphaproteobacteria bacterium 64-11
ruderals	0.134783	16063	1803431	Bacteria	Acidobacteria	NA	NA	NA	NA	Acidobacteria bacterium 13_1_20CM_3_53_8
soil	0.118043	16048	1798227	Bacteria	Actinobacteria	Actinobacteria	Geodermatophilales	Geodermatophilaceae	Blastococcus	Blastococcus sp. DSM 46786
soil	0.117896	16028	394096	Bacteria	Proteobacteria	Deltaproteobacteria	Myxococcales	Archangiaceae	Hyalangium	Hyalangium minutum
tomato	0.107526	16012	1736528	Bacteria	Proteobacteria	Betaproteobacteria	Burkholderiales	NA	Rhizobacter	Rhizobacter sp. Root404
ruderals	0.096079	16000	462367	Bacteria	Bacteroidetes	Chitinophagia	Chitinophagales	Chitinophagaceae	Flavisolibacter	Flavisolibacter ginsengisoli
soil	0.109507	15996	80816	Bacteria	Proteobacteria	Deltaproteobacteria	Myxococcales	Kofleriaceae	Haliangium	Haliangium ochraceum
soil	0.10937	15976	1660163	Bacteria	Gemmatimonadetes	NA	NA	NA	NA	Gemmatimonadetes bacterium SCN 70-22
ruderals	0.094894	15900	360055	Bacteria	Planctomycetes	Planctomycetia	Planctomycetales	Gemmataceae	Zavarzinella	Zavarzinella formosa
ruderals	0.096024	15895	113395	Bacteria	Proteobacteria	Alphaproteobacteria	Rhizobiales	Bradyrhizobiaceae	Bradyrhizobium	Bradyrhizobium sp. Tv2a-2
soil	0.118639	15804	113565	Bacteria	Actinobacteria	Actinobacteria	Micromonosporales	Micromonosporaceae	Actinoplanes	Actinoplanes globisporus
tomato	0.109599	15737	1895795	Bacteria	Proteobacteria	Deltaproteobacteria	Myxococcales	NA	NA	Myxococcales bacterium 68-20
soil	0.117933	15710	1803481	Bacteria	Actinobacteria	NA	NA	NA	NA	Actinobacteria bacterium 13_1_20CM_4_69_9
ruderals	0.094325	15708	888845	Bacteria	Proteobacteria	Deltaproteobacteria	Myxococcales	NA	Minicystis	Minicystis rosea
soil	0.114079	15700	404589	Bacteria	Proteobacteria	Deltaproteobacteria	Myxococcales	Anaeromyxobacteraceae	Anaeromyxobacter	Anaeromyxobacter sp. Fw109-5
soil	0.107474	15699	1904640	Bacteria	Proteobacteria	Betaproteobacteria	NA	NA	NA	Betaproteobacteria bacterium GR16-43
ruderals	0.099301	15623	1855303	Bacteria	Proteobacteria	Gammaproteobacteria	Xanthomonadales	Xanthomonadaceae	Pseudoxanthomonas	Pseudoxanthomonas sp. CF125
ruderals	0.093092	15598	1380391	Bacteria	Proteobacteria	Alphaproteobacteria	Rhodospirillales	Rhodospirillaceae	Dongia	Dongia sp. URHE0060
tomato	0.113155	15595	947013	Bacteria	Bacteroidetes	Cytophagia	Cytophagales	NA	Chryseolinea	Chryseolinea serpens
tomato	0.09225	15534	191495	Bacteria	Actinobacteria	Thermoleophilia	Solirubrobacterales	Conexibacteraceae	Conexibacter	Conexibacter woesei
tomato	0.108108	15523	292222	Bacteria	Proteobacteria	Alphaproteobacteria	Sphingomonadales	Erythrobacteraceae	Altererythrobacter	Altererythrobacter troitsensis
soil	0.114181	15523	137265	Bacteria	Actinobacteria	Actinobacteria	Micromonosporales	Micromonosporaceae	Asanoa	Asanoa ishikariensis
soil	0.1141	15512	504800	Bacteria	Actinobacteria	Actinobacteria	Geodermatophilales	Geodermatophilaceae	Geodermatophilus	Geodermatophilus ruber
ruderals	0.130067	15501	1235591	Bacteria	Proteobacteria	Alphaproteobacteria	Rhizobiales	NA	Pseudorhodoplanes	Pseudorhodoplanes sinuspersici
ruderals	0.093572	15489	1380348	Bacteria	Acidobacteria	Acidobacteriia	Acidobacteriales	Acidobacteriaceae	NA	Acidobacteriaceae bacterium URHE0068
tomato	0.104927	15487	1895838	Bacteria	Bacteroidetes	Sphingobacteriia	Sphingobacteriales	NA	NA	Sphingobacteriales bacterium 44-61
soil	0.112509	15484	1660163	Bacteria	Gemmatimonadetes	NA	NA	NA	NA	Gemmatimonadetes bacterium SCN 70-22
ruderals	0.098347	15473	196914	Bacteria	Actinobacteria	Actinobacteria	Micromonosporales	Micromonosporaceae	Actinoplanes	Actinoplanes friuliensis
soil	0.113799	15471	35754	Bacteria	Actinobacteria	Actinobacteria	Micromonosporales	Micromonosporaceae	Dactylosporangium	Dactylosporangium aurantiacum
soil	0.124368	15450	1429438	Bacteria	Candidatus Tectomicrobia	NA	NA	NA	Candidatus Entotheonella	Candidatus Entotheonella sp. TSY1
soil	0.106103	13181	1353260	Archaea	Thaumarchaeota	Nitrososphaeria	Nitrososphaerales	Nitrososphaeraceae	Candidatus Nitrosocosmicus	Candidatus Nitrocosmicus oleophilus
soil	0.115846	15432	888845	Bacteria	Proteobacteria	Deltaproteobacteria	Myxococcales	NA	Minicystis	Minicystis rosea
ruderals	0.129354	15416	80871	Bacteria	Actinobacteria	Actinobacteria	Frankiales	Cryptosporangiaceae	Cryptosporangium	Cryptosporangium arvum
tomato	0.111617	15383	364039	Bacteria	Proteobacteria	Betaproteobacteria	Burkholderiales	Alcaligenaceae	Azohydromonas	Azohydromonas australica
tomato	0.103242	15374	947013	Bacteria	Bacteroidetes	Cytophagia	Cytophagales	NA	Chryseolinea	Chryseolinea serpens
ruderals	0.092865	15372	80816	Bacteria	Proteobacteria	Deltaproteobacteria	Myxococcales	Kofleriaceae	Haliangium	Haliangium ochraceum
soil	0.111579	15356	360055	Bacteria	Planctomycetes	Planctomycetia	Planctomycetales	Gemmataceae	Zavarzinella	Zavarzinella formosa
ruderals	0.092702	15345	191863	Bacteria	Verrucomicrobia	Spartobacteria	Chthoniobacterales	Chthoniobacteraceae	Chthoniobacter	Chthoniobacter flavus
tomato	0.111102	15312	1032527	Bacteria	Verrucomicrobia	Verrucomicrobiae	Verrucomicrobiales	Verrucomicrobia subdivision 3	Pedosphaera	Pedosphaera parvula
soil	0.112306	15268	1882682	Bacteria	Proteobacteria	Alphaproteobacteria	Rhizobiales	Methylobacteriaceae	Microvirga	Microvirga ossetica
ruderals	0.092225	15266	888845	Bacteria	Proteobacteria	Deltaproteobacteria	Myxococcales	NA	Minicystis	Minicystis rosea
ruderals	0.091021	15251	114	Bacteria	Planctomycetes	Planctomycetia	Planctomycetales	Gemmataceae	Gemmata	Gemmata obscuriglobus
soil	0.110598	15221	1797501	Bacteria	Proteobacteria	Betaproteobacteria	NA	NA	NA	Betaproteobacteria bacterium RIFCSPLOWO2_12_FULL_65_14
soil	0.111916	15215	649831	Bacteria	Actinobacteria	Actinobacteria	Micromonosporales	Micromonosporaceae	Actinoplanes	Actinoplanes sp. N902-109
ruderals	0.0908	15214	398037	Bacteria	Bacteroidetes	Chitinophagia	Chitinophagales	Chitinophagaceae	Segetibacter	Segetibacter koreensis
soil	0.11185	15206	1550233	Bacteria	Actinobacteria	Actinobacteria	Geodermatophilales	Geodermatophilaceae	Blastococcus	Blastococcus sp. DSM 44205
ruderals	0.096498	15182	1895709	Bacteria	Proteobacteria	Alphaproteobacteria	NA	NA	NA	Alphaproteobacteria bacterium 64-11
soil	0.111577	15169	1033741	Bacteria	Proteobacteria	Alphaproteobacteria	Rhizobiales	Methylobacteriaceae	Microvirga	Microvirga massiliensis
soil	0.103825	15166	1391654	Bacteria	Proteobacteria	Deltaproteobacteria	Myxococcales	Labilitrichaceae	Labilithrix	Labilithrix luteola
soil	0.121993	15155	1429439	Bacteria	Candidatus Tectomicrobia	NA	NA	NA	Candidatus Entotheonella	Candidatus Entotheonella sp. TSY2
ruderals	0.096326	15155	482630	Bacteria	Cyanobacteria	NA	Nostocales	Tolypothrichaceae	Hassallia	Hassallia byssoidea
soil	0.103235	13752	588596	Eukaryota	Mucoromycota	Glomeromycetes	Glomerales	Glomeraceae	Rhizophagus	Rhizophagus irregularis
ruderals	0.091337	15119	1803466	Bacteria	Acidobacteria	NA	NA	NA	NA	Acidobacteria bacterium 13_2_20CM_58_27
tomato	0.08975	15113	482564	Bacteria	Cyanobacteria	NA	Oscillatoriales	Oscillatoriaceae	Oscillatoria	Oscillatoria nigro-viridis
tomato	0.105051	15084	1895714	Bacteria	Proteobacteria	Alphaproteobacteria	Sphingomonadales	Erythrobacteraceae	Altererythrobacter	Altererythrobacter sp. 66-12
ruderals	0.089989	15078	113571	Bacteria	Actinobacteria	Actinobacteria	Micromonosporales	Micromonosporaceae	Actinoplanes	Actinoplanes rectilineatus
ruderals	0.089965	15074	1895838	Bacteria	Bacteroidetes	Sphingobacteriia	Sphingobacteriales	NA	NA	Sphingobacteriales bacterium 44-61
ruderals	0.126467	15072	888845	Bacteria	Proteobacteria	Deltaproteobacteria	Myxococcales	NA	Minicystis	Minicystis rosea
soil	0.109465	15065	51	Bacteria	Proteobacteria	Deltaproteobacteria	Myxococcales	Polyangiaceae	Chondromyces	Chondromyces apiculatus
tomato	0.10471	15035	543632	Bacteria	Actinobacteria	Actinobacteria	Micromonosporales	Micromonosporaceae	Actinoplanes	Actinoplanes subtropicus
soil	0.120987	15030	465721	Bacteria	Proteobacteria	Gammaproteobacteria	Nevskiales	Sinobacteraceae	Steroidobacter	Steroidobacter denitrificans
soil	0.110503	15023	35752	Bacteria	Actinobacteria	Actinobacteria	Micromonosporales	Micromonosporaceae	Actinoplanes	Actinoplanes philippinensis
tomato	0.101756	15019	454194	Bacteria	Acidobacteria	Blastocatellia	NA	NA	Pyrinomonas	Pyrinomonas methylaliphatogenes
tomato	0.100845	15017	312279	Bacteria	Bacteroidetes	Cytophagia	Cytophagales	Cytophagaceae	Emticicia	Emticicia oligotrophica
ruderals	0.089595	15012	1866	Bacteria	Actinobacteria	Actinobacteria	Micromonosporales	Micromonosporaceae	Actinoplanes	Actinoplanes missouriensis
ruderals	0.090068	14999	1803475	Bacteria	Actinobacteria	NA	NA	NA	NA	Actinobacteria bacterium 13_1_20CM_3_68_9
tomato	0.101404	14967	1904640	Bacteria	Proteobacteria	Betaproteobacteria	NA	NA	NA	Betaproteobacteria bacterium GR16-43
tomato	0.108591	14966	191495	Bacteria	Actinobacteria	Thermoleophilia	Solirubrobacterales	Conexibacteraceae	Conexibacter	Conexibacter woesei
ruderals	0.094782	14912	1904967	Bacteria	Actinobacteria	Actinobacteria	Pseudonocardiales	Pseudonocardiaceae	Pseudonocardia	Pseudonocardia sp. CNS-004
ruderals	0.088992	14911	1380390	Bacteria	Actinobacteria	Thermoleophilia	Solirubrobacterales	NA	NA	Solirubrobacterales bacterium URHD0059
soil	0.108317	14907	543632	Bacteria	Actinobacteria	Actinobacteria	Micromonosporales	Micromonosporaceae	Actinoplanes	Actinoplanes subtropicus
soil	0.109518	14889	1630693	Bacteria	Planctomycetes	Planctomycetia	Planctomycetales	Gemmataceae	Gemmata	Gemmata sp. SH-PL17
soil	0.101929	14889	360055	Bacteria	Planctomycetes	Planctomycetia	Planctomycetales	Gemmataceae	Zavarzinella	Zavarzinella formosa
tomato	0.107822	14860	94132	Bacteria	Proteobacteria	Betaproteobacteria	Burkholderiales	Comamonadaceae	Ramlibacter	Ramlibacter tataouinensis
ruderals	0.094299	14836	1380390	Bacteria	Actinobacteria	Thermoleophilia	Solirubrobacterales	NA	NA	Solirubrobacterales bacterium URHD0059
ruderals	0.09419	14819	332163	Bacteria	Acidobacteria	Solibacteres	Solibacterales	Solibacteraceae	Candidatus Solibacter	Candidatus Solibacter usitatus
tomato	0.087963	14812	196914	Bacteria	Actinobacteria	Actinobacteria	Micromonosporales	Micromonosporaceae	Actinoplanes	Actinoplanes friuliensis
tomato	0.099394	14801	1380389	Bacteria	Proteobacteria	Alphaproteobacteria	Sphingomonadales	Sphingomonadaceae	Sphingomonas	Sphingomonas sp. URHD0057
ruderals	0.088837	14794	56438	Bacteria	Actinobacteria	Actinobacteria	Micromonosporales	Micromonosporaceae	Couchioplanes	Couchioplanes caeruleus
soil	0.111042	14792	1630693	Bacteria	Planctomycetes	Planctomycetia	Planctomycetales	Gemmataceae	Gemmata	Gemmata sp. SH-PL17
soil	0.111042	14792	1895795	Bacteria	Proteobacteria	Deltaproteobacteria	Myxococcales	NA	NA	Myxococcales bacterium 68-20
ruderals	0.089355	14791	1032527	Bacteria	Verrucomicrobia	Verrucomicrobiae	Verrucomicrobiales	Verrucomicrobia subdivision 3	Pedosphaera	Pedosphaera parvula
ruderals	0.088156	14771	332163	Bacteria	Acidobacteria	Solibacteres	Solibacterales	Solibacteraceae	Candidatus Solibacter	Candidatus Solibacter usitatus
soil	0.107053	14733	1803477	Bacteria	Actinobacteria	NA	NA	NA	NA	Actinobacteria bacterium 13_1_20CM_3_71_11
soil	0.118411	14710	1895833	Bacteria	Actinobacteria	Thermoleophilia	Solirubrobacterales	NA	NA	Solirubrobacterales bacterium 70-9
tomato	0.087286	14698	1797182	Bacteria	Acidobacteria	NA	NA	NA	NA	Acidobacteria bacterium RIFCSPLOWO2_02_FULL_65_29
soil	0.110291	14692	80871	Bacteria	Actinobacteria	Actinobacteria	Frankiales	Cryptosporangiaceae	Cryptosporangium	Cryptosporangium arvum
soil	0.098851	14638	454194	Bacteria	Acidobacteria	Blastocatellia	NA	NA	Pyrinomonas	Pyrinomonas methylaliphatogenes
ruderals	0.088425	14637	1040989	Bacteria	Proteobacteria	Alphaproteobacteria	Rhizobiales	Bradyrhizobiaceae	Bradyrhizobium	Bradyrhizobium sp. ARR65
ruderals	0.088292	14615	1465490	Bacteria	Bacteroidetes	Chitinophagia	Chitinophagales	Chitinophagaceae	Parafilimonas	Parafilimonas terrae
ruderals	0.087522	14575	114	Bacteria	Planctomycetes	Planctomycetia	Planctomycetales	Gemmataceae	Gemmata	Gemmata obscuriglobus
tomato	0.086537	14572	1302690	Bacteria	Bacteroidetes	Chitinophagia	Chitinophagales	Chitinophagaceae	Cnuella	Cnuella takakiae
ruderals	0.087504	14572	864069	Bacteria	Proteobacteria	Alphaproteobacteria	Rhizobiales	Methylobacteriaceae	Microvirga	Microvirga lotononidis
soil	0.098379	14568	1797501	Bacteria	Proteobacteria	Betaproteobacteria	NA	NA	NA	Betaproteobacteria bacterium RIFCSPLOWO2_12_FULL_65_14
ruderals	0.087438	14561	1904967	Bacteria	Actinobacteria	Actinobacteria	Pseudonocardiales	Pseudonocardiaceae	Pseudonocardia	Pseudonocardia sp. CNS-004
soil	0.098244	14548	113565	Bacteria	Actinobacteria	Actinobacteria	Micromonosporales	Micromonosporaceae	Actinoplanes	Actinoplanes globisporus
tomato	0.10545	14533	1813736	Bacteria	Acidobacteria	NA	NA	NA	NA	Acidobacteria bacterium DSM 100886
tomato	0.105435	14531	1904640	Bacteria	Proteobacteria	Betaproteobacteria	NA	NA	NA	Betaproteobacteria bacterium GR16-43
ruderals	0.087252	14530	1033741	Bacteria	Proteobacteria	Alphaproteobacteria	Rhizobiales	Methylobacteriaceae	Microvirga	Microvirga massiliensis
ruderals	0.092277	14518	927083	Bacteria	Proteobacteria	Deltaproteobacteria	Myxococcales	Sandaracinaceae	Sandaracinus	Sandaracinus amylolyticus
ruderals	0.087664	14511	1660163	Bacteria	Gemmatimonadetes	NA	NA	NA	NA	Gemmatimonadetes bacterium SCN 70-22
ruderals	0.087531	14489	722472	Bacteria	Proteobacteria	Alphaproteobacteria	Rhizobiales	Bradyrhizobiaceae	Bradyrhizobium	Bradyrhizobium lablabi
ruderals	0.086969	14483	1861	Bacteria	Actinobacteria	Actinobacteria	Geodermatophilales	Geodermatophilaceae	Geodermatophilus	Geodermatophilus obscurus
ruderals	0.092004	14475	1985174	Bacteria	Bacteroidetes	Chitinophagia	Chitinophagales	Chitinophagaceae	NA	Chitinophagaceae bacterium IBVUCB2
soil	0.098855	14440	186479	Bacteria	Chloroflexi	NA	NA	NA	Kouleothrix	Kouleothrix aurantiaca
ruderals	0.087235	14440	360054	Bacteria	Acidobacteria	Solibacteres	Solibacterales	Bryobacteraceae	Bryobacter	Bryobacter aggregatus
tomato	0.085623	14418	470	Bacteria	Proteobacteria	Gammaproteobacteria	Pseudomonadales	Moraxellaceae	Acinetobacter	Acinetobacter baumannii
tomato	0.100315	14404	1798290	Bacteria	Proteobacteria	Gammaproteobacteria	NA	NA	NA	Gammaproteobacteria bacterium RIFCSPHIGHO2_12_FULL_63_22
tomato	0.097454	14384	1895833	Bacteria	Actinobacteria	Thermoleophilia	Solirubrobacterales	NA	NA	Solirubrobacterales bacterium 70-9
soil	0.097035	14369	460086	Bacteria	Actinobacteria	Actinobacteria	Propionibacteriales	Nocardioidaceae	Kribbella	Kribbella catacumbae
tomato	0.099563	14296	1895839	Bacteria	Bacteroidetes	Sphingobacteriia	Sphingobacteriales	NA	NA	Sphingobacteriales bacterium 46-32
soil	0.096542	14296	1803481	Bacteria	Actinobacteria	NA	NA	NA	NA	Actinobacteria bacterium 13_1_20CM_4_69_9
ruderals	0.090834	14291	1391654	Bacteria	Proteobacteria	Deltaproteobacteria	Myxococcales	Labilitrichaceae	Labilithrix	Labilithrix luteola
soil	0.097787	14284	1803462	Bacteria	Acidobacteria	NA	NA	NA	NA	Acidobacteria bacterium 13_2_20CM_2_66_4
ruderals	0.085053	14251	1380357	Bacteria	Proteobacteria	Alphaproteobacteria	Rhodospirillales	NA	NA	Rhodospirillales bacterium URHD0017
ruderals	0.08602	14239	1076	Bacteria	Proteobacteria	Alphaproteobacteria	Rhizobiales	Bradyrhizobiaceae	Rhodopseudomonas	Rhodopseudomonas palustris
ruderals	0.085408	14223	407019	Bacteria	Proteobacteria	Alphaproteobacteria	Sphingomonadales	Sphingomonadaceae	Sphingomonas	Sphingomonas astaxanthinifaciens
ruderals	0.084844	14216	888845	Bacteria	Proteobacteria	Deltaproteobacteria	Myxococcales	NA	Minicystis	Minicystis rosea
ruderals	0.08509	14170	433660	Bacteria	Actinobacteria	Actinobacteria	Propionibacteriales	Nocardioidaceae	Nocardioides	Nocardioides halotolerans
ruderals	0.085042	14162	35752	Bacteria	Actinobacteria	Actinobacteria	Micromonosporales	Micromonosporaceae	Actinoplanes	Actinoplanes philippinensis
soil	0.106208	14148	1803447	Bacteria	Acidobacteria	NA	NA	NA	NA	Acidobacteria bacterium 13_1_40CM_3_55_6
ruderals	0.089894	14143	1298863	Bacteria	Actinobacteria	Actinobacteria	Propionibacteriales	Nocardioidaceae	Marmoricola	Marmoricola sp. URHB0036
ruderals	0.084367	14136	1869	Bacteria	Actinobacteria	Actinobacteria	Micromonosporales	Micromonosporaceae	Actinoplanes	Actinoplanes utahensis
soil	0.103942	14131	1380393	Bacteria	Actinobacteria	Actinobacteria	Geodermatophilales	Geodermatophilaceae	NA	Geodermatophilaceae bacterium URHA0031
soil	0.103942	14131	1411123	Bacteria	Proteobacteria	Alphaproteobacteria	Rhizobiales	NA	NA	Rhizobiales bacterium YIM 77505
ruderals	0.084826	14126	360055	Bacteria	Planctomycetes	Planctomycetia	Planctomycetales	Gemmataceae	Zavarzinella	Zavarzinella formosa
tomato	0.098344	14121	354356	Bacteria	Bacteroidetes	Chitinophagia	Chitinophagales	Chitinophagaceae	Niastella	Niastella koreensis
soil	0.10367	14094	1470358	Bacteria	Actinobacteria	Actinobacteria	Geodermatophilales	Geodermatophilaceae	Blastococcus	Candidatus Blastococcus massiliensis
soil	0.096473	14092	543632	Bacteria	Actinobacteria	Actinobacteria	Micromonosporales	Micromonosporaceae	Actinoplanes	Actinoplanes subtropicus
soil	0.095822	13997	113565	Bacteria	Actinobacteria	Actinobacteria	Micromonosporales	Micromonosporaceae	Actinoplanes	Actinoplanes globisporus
tomato	0.094825	13996	1437360	Bacteria	Proteobacteria	Alphaproteobacteria	Rhizobiales	Bradyrhizobiaceae	Bradyrhizobium	Bradyrhizobium erythrophlei
soil	0.102795	13975	420324	Bacteria	Proteobacteria	Alphaproteobacteria	Rhizobiales	Methylobacteriaceae	Microvirga	Microvirga lupini
soil	0.094347	13971	1803447	Bacteria	Acidobacteria	NA	NA	NA	NA	Acidobacteria bacterium 13_1_40CM_3_55_6
ruderals	0.083316	13960	1736528	Bacteria	Proteobacteria	Betaproteobacteria	Burkholderiales	NA	Rhizobacter	Rhizobacter sp. Root404
tomato	0.09716	13951	1736433	Bacteria	Proteobacteria	Betaproteobacteria	Burkholderiales	NA	Rhizobacter	Rhizobacter sp. Root1221
ruderals	0.083661	13932	543632	Bacteria	Actinobacteria	Actinobacteria	Micromonosporales	Micromonosporaceae	Actinoplanes	Actinoplanes subtropicus
tomato	0.082695	13925	674703	Bacteria	Proteobacteria	Alphaproteobacteria	Rhizobiales	Hyphomicrobiaceae	Rhodoplanes	Rhodoplanes sp. Z2-YC6860
soil	0.093989	13918	465721	Bacteria	Proteobacteria	Gammaproteobacteria	Nevskiales	Sinobacteraceae	Steroidobacter	Steroidobacter denitrificans
ruderals	0.08354	13912	1437360	Bacteria	Proteobacteria	Alphaproteobacteria	Rhizobiales	Bradyrhizobiaceae	Bradyrhizobium	Bradyrhizobium erythrophlei
tomato	0.082576	13905	94132	Bacteria	Proteobacteria	Betaproteobacteria	Burkholderiales	Comamonadaceae	Ramlibacter	Ramlibacter tataouinensis
soil	0.095117	13894	1803481	Bacteria	Actinobacteria	NA	NA	NA	NA	Actinobacteria bacterium 13_1_20CM_4_69_9
soil	0.104263	13889	1803475	Bacteria	Actinobacteria	NA	NA	NA	NA	Actinobacteria bacterium 13_1_20CM_3_68_9
soil	0.093557	13854	1904967	Bacteria	Actinobacteria	Actinobacteria	Pseudonocardiales	Pseudonocardiaceae	Pseudonocardia	Pseudonocardia sp. CNS-004
ruderals	0.087936	13835	1895841	Bacteria	Bacteroidetes	Sphingobacteriia	Sphingobacteriales	NA	NA	Sphingobacteriales bacterium 50-39
ruderals	0.082964	13816	29539	Bacteria	Actinobacteria	Thermoleophilia	Thermoleophilales	Thermoleophilaceae	Thermoleophilum	Thermoleophilum album
ruderals	0.083368	13800	186479	Bacteria	Chloroflexi	NA	NA	NA	Kouleothrix	Kouleothrix aurantiaca
tomato	0.092524	13778	1985174	Bacteria	Bacteroidetes	Chitinophagia	Chitinophagales	Chitinophagaceae	NA	Chitinophagaceae bacterium IBVUCB2
tomato	0.081495	13723	332163	Bacteria	Acidobacteria	Solibacteres	Solibacterales	Solibacteraceae	Candidatus Solibacter	Candidatus Solibacter usitatus
soil	0.093871	13712	947013	Bacteria	Bacteroidetes	Cytophagia	Cytophagales	NA	Chryseolinea	Chryseolinea serpens
soil	0.093693	13686	1961108	Bacteria	Proteobacteria	Deltaproteobacteria	Myxococcales	Polyangiaceae	NA	Polyangiaceae bacterium UTPRO1
ruderals	0.081675	13685	947013	Bacteria	Bacteroidetes	Cytophagia	Cytophagales	NA	Chryseolinea	Chryseolinea serpens
ruderals	0.082613	13675	1803477	Bacteria	Actinobacteria	NA	NA	NA	NA	Actinobacteria bacterium 13_1_20CM_3_71_11
soil	0.102612	13669	332163	Bacteria	Acidobacteria	Solibacteres	Solibacterales	Solibacteraceae	Candidatus Solibacter	Candidatus Solibacter usitatus
tomato	0.091577	13637	125	Bacteria	Planctomycetes	Planctomycetia	Planctomycetales	Planctomycetaceae	Pirellula	Pirellula staleyi
tomato	0.09496	13635	1465490	Bacteria	Bacteroidetes	Chitinophagia	Chitinophagales	Chitinophagaceae	Parafilimonas	Parafilimonas terrae
tomato	0.094897	13626	1797182	Bacteria	Acidobacteria	NA	NA	NA	NA	Acidobacteria bacterium RIFCSPLOWO2_02_FULL_65_29
soil	0.091578	13561	1904640	Bacteria	Proteobacteria	Betaproteobacteria	NA	NA	NA	Betaproteobacteria bacterium GR16-43
soil	0.098508	13557	35754	Bacteria	Actinobacteria	Actinobacteria	Micromonosporales	Micromonosporaceae	Dactylosporangium	Dactylosporangium aurantiacum
ruderals	0.086106	13547	543632	Bacteria	Actinobacteria	Actinobacteria	Micromonosporales	Micromonosporaceae	Actinoplanes	Actinoplanes subtropicus
soil	0.099485	13525	477641	Bacteria	Actinobacteria	Actinobacteria	Geodermatophilales	Geodermatophilaceae	Modestobacter	Modestobacter marinus
tomato	0.090772	13517	1803475	Bacteria	Actinobacteria	NA	NA	NA	NA	Actinobacteria bacterium 13_1_20CM_3_68_9
soil	0.091227	13509	1660163	Bacteria	Gemmatimonadetes	NA	NA	NA	NA	Gemmatimonadetes bacterium SCN 70-22
ruderals	0.081532	13496	360055	Bacteria	Planctomycetes	Planctomycetia	Planctomycetales	Gemmataceae	Zavarzinella	Zavarzinella formosa
ruderals	0.080922	13476	1736584	Bacteria	Proteobacteria	Alphaproteobacteria	Sphingomonadales	Erythrobacteraceae	Altererythrobacter	Altererythrobacter sp. Root672
soil	0.098484	13389	1380357	Bacteria	Proteobacteria	Alphaproteobacteria	Rhodospirillales	NA	NA	Rhodospirillales bacterium URHD0017
ruderals	0.080807	13376	29448	Bacteria	Proteobacteria	Alphaproteobacteria	Rhizobiales	Bradyrhizobiaceae	Bradyrhizobium	Bradyrhizobium elkanii
soil	0.097156	13371	1577687	Bacteria	Acidobacteria	Acidobacteriia	Acidobacteriales	Acidobacteriaceae	Terracidiphilus	Terracidiphilus gabretensis
tomato	0.096982	13366	1797182	Bacteria	Acidobacteria	NA	NA	NA	NA	Acidobacteria bacterium RIFCSPLOWO2_02_FULL_65_29
ruderals	0.084942	13364	1933817	Bacteria	Actinobacteria	Actinobacteria	Propionibacteriales	Nocardioidaceae	Kribbella	Kribbella sp. ALI-6-A
ruderals	0.08493	13362	1912961	Bacteria	Actinobacteria	Actinobacteria	Pseudonocardiales	Pseudonocardiaceae	Actinophytocola	Actinophytocola xanthii
ruderals	0.080662	13352	1391654	Bacteria	Proteobacteria	Deltaproteobacteria	Myxococcales	Labilitrichaceae	Labilithrix	Labilithrix luteola
ruderals	0.08486	13351	460086	Bacteria	Actinobacteria	Actinobacteria	Propionibacteriales	Nocardioidaceae	Kribbella	Kribbella catacumbae
ruderals	0.080638	13348	1895795	Bacteria	Proteobacteria	Deltaproteobacteria	Myxococcales	NA	NA	Myxococcales bacterium 68-20
tomato	0.089637	13348	1630693	Bacteria	Planctomycetes	Planctomycetia	Planctomycetales	Gemmataceae	Gemmata	Gemmata sp. SH-PL17
tomato	0.09032	13331	1380390	Bacteria	Actinobacteria	Thermoleophilia	Solirubrobacterales	NA	NA	Solirubrobacterales bacterium URHD0059
soil	0.089991	13326	1391654	Bacteria	Proteobacteria	Deltaproteobacteria	Myxococcales	Labilitrichaceae	Labilithrix	Labilithrix luteola
tomato	0.096677	13324	1500261	Bacteria	Proteobacteria	Betaproteobacteria	Burkholderiales	NA	Methylibium	Methylibium sp. CF059
ruderals	0.079962	13316	1803507	Bacteria	Proteobacteria	Alphaproteobacteria	NA	NA	NA	Alphaproteobacteria bacterium 13_2_20CM_2_64_7
tomato	0.092731	13315	1961110	Bacteria	Bacteroidetes	Sphingobacteriia	Sphingobacteriales	NA	NA	Sphingobacteriales bacterium UTBCD1
soil	0.096669	13304	191863	Bacteria	Verrucomicrobia	Spartobacteria	Chthoniobacterales	Chthoniobacteraceae	Chthoniobacter	Chthoniobacter flavus
ruderals	0.079817	13292	573321	Bacteria	Bacteroidetes	Chitinophagia	Chitinophagales	Chitinophagaceae	Chitinophaga	Chitinophaga rupis
tomato	0.08912	13271	74313	Bacteria	Proteobacteria	Alphaproteobacteria	Caulobacterales	Caulobacteraceae	Brevundimonas	Brevundimonas subvibrioides
tomato	0.078793	13268	191863	Bacteria	Verrucomicrobia	Spartobacteria	Chthoniobacterales	Chthoniobacteraceae	Chthoniobacter	Chthoniobacter flavus
tomato	0.089893	13268	1803507	Bacteria	Proteobacteria	Alphaproteobacteria	NA	NA	NA	Alphaproteobacteria bacterium 13_2_20CM_2_64_7
tomato	0.096206	13259	1703345	Bacteria	Bacteroidetes	Chitinophagia	Chitinophagales	Chitinophagaceae	Niastella	Niastella vici
soil	0.090756	13257	454194	Bacteria	Acidobacteria	Blastocatellia	NA	NA	Pyrinomonas	Pyrinomonas methylaliphatogenes
soil	0.089498	13253	1805166	Bacteria	Proteobacteria	Gammaproteobacteria	NA	NA	NA	Gammaproteobacteria bacterium 13_2_20CM_66_19
soil	0.106643	13248	43	Bacteria	Proteobacteria	Deltaproteobacteria	Myxococcales	Archangiaceae	Cystobacter	Cystobacter fuscus
ruderals	0.079937	13232	1895825	Bacteria	Proteobacteria	Alphaproteobacteria	Rhodospirillales	NA	NA	Rhodospirillales bacterium 69-11
ruderals	0.084053	13224	137265	Bacteria	Actinobacteria	Actinobacteria	Micromonosporales	Micromonosporaceae	Asanoa	Asanoa ishikariensis
tomato	0.08875	13216	392409	Bacteria	Proteobacteria	Alphaproteobacteria	Sphingomonadales	Sphingomonadaceae	Sphingomonas	Sphingomonas jaspsi
soil	0.090435	13210	114	Bacteria	Planctomycetes	Planctomycetia	Planctomycetales	Gemmataceae	Gemmata	Gemmata obscuriglobus
soil	0.095913	13200	1380357	Bacteria	Proteobacteria	Alphaproteobacteria	Rhodospirillales	NA	NA	Rhodospirillales bacterium URHD0017
ruderals	0.078673	13182	1492898	Bacteria	Bacteroidetes	Chitinophagia	Chitinophagales	Chitinophagaceae	Flavisolibacter	Flavisolibacter sp. LCS9
tomato	0.091749	13174	407019	Bacteria	Proteobacteria	Alphaproteobacteria	Sphingomonadales	Sphingomonadaceae	Sphingomonas	Sphingomonas astaxanthinifaciens
tomato	0.091707	13168	1298857	Bacteria	Actinobacteria	Thermoleophilia	Solirubrobacterales	Solirubrobacteraceae	Solirubrobacter	Solirubrobacter sp. URHD0082
ruderals	0.078524	13157	1235591	Bacteria	Proteobacteria	Alphaproteobacteria	Rhizobiales	NA	Pseudorhodoplanes	Pseudorhodoplanes sinuspersici
ruderals	0.079303	13127	375	Bacteria	Proteobacteria	Alphaproteobacteria	Rhizobiales	Bradyrhizobiaceae	Bradyrhizobium	Bradyrhizobium japonicum
soil	0.088634	13125	1803475	Bacteria	Actinobacteria	NA	NA	NA	NA	Actinobacteria bacterium 13_1_20CM_3_68_9
soil	0.089675	13099	191863	Bacteria	Verrucomicrobia	Spartobacteria	Chthoniobacterales	Chthoniobacteraceae	Chthoniobacter	Chthoniobacter flavus
soil	0.095172	13098	551947	Bacteria	Proteobacteria	Alphaproteobacteria	Rhizobiales	Bradyrhizobiaceae	Bradyrhizobium	Bradyrhizobium sp. STM 3843
tomato	0.091164	13090	1691979	Bacteria	Bacteroidetes	Chitinophagia	Chitinophagales	Chitinophagaceae	NA	Chitinophagaceae bacterium PMP191F
ruderals	0.078022	13073	1895795	Bacteria	Proteobacteria	Deltaproteobacteria	Myxococcales	NA	NA	Myxococcales bacterium 68-20
ruderals	0.078004	13070	454194	Bacteria	Acidobacteria	Blastocatellia	NA	NA	Pyrinomonas	Pyrinomonas methylaliphatogenes
soil	0.088195	13060	1630693	Bacteria	Planctomycetes	Planctomycetia	Planctomycetales	Gemmataceae	Gemmata	Gemmata sp. SH-PL17
tomato	0.094754	13059	1380391	Bacteria	Proteobacteria	Alphaproteobacteria	Rhodospirillales	Rhodospirillaceae	Dongia	Dongia sp. URHE0060
soil	0.105065	13052	1630693	Bacteria	Planctomycetes	Planctomycetia	Planctomycetales	Gemmataceae	Gemmata	Gemmata sp. SH-PL17
ruderals	0.078741	13034	550983	Bacteria	Bacteroidetes	Chitinophagia	Chitinophagales	Chitinophagaceae	Niastella	Niastella populi
tomato	0.088165	13013	1032527	Bacteria	Verrucomicrobia	Verrucomicrobiae	Verrucomicrobiales	Verrucomicrobia subdivision 3	Pedosphaera	Pedosphaera parvula
ruderals	0.077622	13006	1797182	Bacteria	Acidobacteria	NA	NA	NA	NA	Acidobacteria bacterium RIFCSPLOWO2_02_FULL_65_29
tomato	0.090516	12997	94132	Bacteria	Proteobacteria	Betaproteobacteria	Burkholderiales	Comamonadaceae	Ramlibacter	Ramlibacter tataouinensis
ruderals	0.108998	12990	191863	Bacteria	Verrucomicrobia	Spartobacteria	Chthoniobacterales	Chthoniobacteraceae	Chthoniobacter	Chthoniobacter flavus
ruderals	0.108939	12983	1985174	Bacteria	Bacteroidetes	Chitinophagia	Chitinophagales	Chitinophagaceae	NA	Chitinophagaceae bacterium IBVUCB2
ruderals	0.077854	12965	1411123	Bacteria	Proteobacteria	Alphaproteobacteria	Rhizobiales	NA	NA	Rhizobiales bacterium YIM 77505
ruderals	0.108779	12964	1895795	Bacteria	Proteobacteria	Deltaproteobacteria	Myxococcales	NA	NA	Myxococcales bacterium 68-20
tomato	0.07684	12939	1895839	Bacteria	Bacteroidetes	Sphingobacteriia	Sphingobacteriales	NA	NA	Sphingobacteriales bacterium 46-32
ruderals	0.077692	12938	550983	Bacteria	Bacteroidetes	Chitinophagia	Chitinophagales	Chitinophagaceae	Niastella	Niastella populi
ruderals	0.108528	12934	550983	Bacteria	Bacteroidetes	Chitinophagia	Chitinophagales	Chitinophagaceae	Niastella	Niastella populi
soil	0.104075	12929	1549810	Bacteria	Proteobacteria	Alphaproteobacteria	Rhizobiales	Methylobacteriaceae	Microvirga	Microvirga sp. BSC39
ruderals	0.077792	12877	354356	Bacteria	Bacteroidetes	Chitinophagia	Chitinophagales	Chitinophagaceae	Niastella	Niastella koreensis
soil	0.096621	12871	1799662	Bacteria	Proteobacteria	Betaproteobacteria	NA	NA	NA	Betaproteobacteria bacterium SCGC AG-212-J23
ruderals	0.081783	12867	1895753	Bacteria	Proteobacteria	Alphaproteobacteria	Rhizobiales	Hyphomicrobiaceae	Devosia	Devosia sp. 66-22
soil	0.086804	12854	1736466	Bacteria	Proteobacteria	Alphaproteobacteria	Rhizobiales	Xanthobacteraceae	Pseudolabrys	Pseudolabrys sp. Root1462
soil	0.103447	12851	1033741	Bacteria	Proteobacteria	Alphaproteobacteria	Rhizobiales	Methylobacteriaceae	Microvirga	Microvirga massiliensis
ruderals	0.077502	12829	114	Bacteria	Planctomycetes	Planctomycetia	Planctomycetales	Gemmataceae	Gemmata	Gemmata obscuriglobus
soil	0.086601	12824	1465490	Bacteria	Bacteroidetes	Chitinophagia	Chitinophagales	Chitinophagaceae	Parafilimonas	Parafilimonas terrae
ruderals	0.076196	12767	212354	Bacteria	Cyanobacteria	NA	Nostocales	Nostocaceae	Nostoc	Nostoc calcicola
soil	0.086898	12868	588596	Eukaryota	Mucoromycota	Glomeromycetes	Glomerales	Glomeraceae	Rhizophagus	Rhizophagus irregularis
ruderals	0.076617	12759	1302690	Bacteria	Bacteroidetes	Chitinophagia	Chitinophagales	Chitinophagaceae	Cnuella	Cnuella takakiae
ruderals	0.076965	12740	1797182	Bacteria	Acidobacteria	NA	NA	NA	NA	Acidobacteria bacterium RIFCSPLOWO2_02_FULL_65_29
tomato	0.075503	12714	1630693	Bacteria	Planctomycetes	Planctomycetia	Planctomycetales	Gemmataceae	Gemmata	Gemmata sp. SH-PL17
soil	0.086936	12699	35754	Bacteria	Actinobacteria	Actinobacteria	Micromonosporales	Micromonosporaceae	Dactylosporangium	Dactylosporangium aurantiacum
ruderals	0.076663	12690	1803494	Bacteria	Actinobacteria	NA	NA	NA	NA	Actinobacteria bacterium 13_2_20CM_2_71_6
tomato	0.085144	12679	1869	Bacteria	Actinobacteria	Actinobacteria	Micromonosporales	Micromonosporaceae	Actinoplanes	Actinoplanes utahensis
soil	0.095165	12677	80816	Bacteria	Proteobacteria	Deltaproteobacteria	Myxococcales	Kofleriaceae	Haliangium	Haliangium ochraceum
tomato	0.085131	12677	364039	Bacteria	Proteobacteria	Betaproteobacteria	Burkholderiales	Alcaligenaceae	Azohydromonas	Azohydromonas australica
ruderals	0.076548	12671	392409	Bacteria	Proteobacteria	Alphaproteobacteria	Sphingomonadales	Sphingomonadaceae	Sphingomonas	Sphingomonas jaspsi
tomato	0.088183	12662	1838286	Bacteria	Verrucomicrobia	Opitutae	Opitutales	Opitutaceae	Lacunisphaera	Lacunisphaera limnophila
soil	0.086457	12629	1895833	Bacteria	Actinobacteria	Thermoleophilia	Solirubrobacterales	NA	NA	Solirubrobacterales bacterium 70-9
soil	0.091663	12615	1797182	Bacteria	Acidobacteria	NA	NA	NA	NA	Acidobacteria bacterium RIFCSPLOWO2_02_FULL_65_29
tomato	0.084466	12578	462367	Bacteria	Bacteroidetes	Chitinophagia	Chitinophagales	Chitinophagaceae	Flavisolibacter	Flavisolibacter ginsengisoli
ruderals	0.079947	12578	1703345	Bacteria	Bacteroidetes	Chitinophagia	Chitinophagales	Chitinophagaceae	Niastella	Niastella vici
ruderals	0.079864	12565	135946	Bacteria	Actinobacteria	Actinobacteria	Micromonosporales	Micromonosporaceae	Actinoplanes	Actinoplanes awajinensis
soil	0.092313	12550	465721	Bacteria	Proteobacteria	Gammaproteobacteria	Nevskiales	Sinobacteraceae	Steroidobacter	Steroidobacter denitrificans
tomato	0.087159	12515	1797561	Bacteria	Proteobacteria	Betaproteobacteria	Burkholderiales	NA	NA	Burkholderiales bacterium RIFCSPHIGHO2_12_FULL_69_20
ruderals	0.079546	12515	1797182	Bacteria	Acidobacteria	NA	NA	NA	NA	Acidobacteria bacterium RIFCSPLOWO2_02_FULL_65_29
ruderals	0.07511	12508	393310	Bacteria	Proteobacteria	Alphaproteobacteria	Rhodospirillales	Rhodospirillaceae	Skermanella	Skermanella aerolata
tomato	0.084588	12485	407019	Bacteria	Proteobacteria	Alphaproteobacteria	Sphingomonadales	Sphingomonadaceae	Sphingomonas	Sphingomonas astaxanthinifaciens
ruderals	0.074863	12467	1797182	Bacteria	Acidobacteria	NA	NA	NA	NA	Acidobacteria bacterium RIFCSPLOWO2_02_FULL_65_29
tomato	0.086783	12461	1302690	Bacteria	Bacteroidetes	Chitinophagia	Chitinophagales	Chitinophagaceae	Cnuella	Cnuella takakiae
soil	0.084096	12453	1895832	Bacteria	Actinobacteria	Thermoleophilia	Solirubrobacterales	NA	NA	Solirubrobacterales bacterium 67-14
soil	0.099993	12422	332163	Bacteria	Acidobacteria	Solibacteres	Solibacterales	Solibacteraceae	Candidatus Solibacter	Candidatus Solibacter usitatus
tomato	0.090096	12417	196914	Bacteria	Actinobacteria	Actinobacteria	Micromonosporales	Micromonosporaceae	Actinoplanes	Actinoplanes friuliensis
ruderals	0.078834	12403	1895839	Bacteria	Bacteroidetes	Sphingobacteriia	Sphingobacteriales	NA	NA	Sphingobacteriales bacterium 46-32
ruderals	0.07397	12394	94132	Bacteria	Proteobacteria	Betaproteobacteria	Burkholderiales	Comamonadaceae	Ramlibacter	Ramlibacter tataouinensis
tomato	0.08323	12394	1904967	Bacteria	Actinobacteria	Actinobacteria	Pseudonocardiales	Pseudonocardiaceae	Pseudonocardia	Pseudonocardia sp. CNS-004
tomato	0.086101	12363	1391654	Bacteria	Proteobacteria	Deltaproteobacteria	Myxococcales	Labilitrichaceae	Labilithrix	Labilithrix luteola
tomato	0.083558	12333	1805166	Bacteria	Proteobacteria	Gammaproteobacteria	NA	NA	NA	Gammaproteobacteria bacterium 13_2_20CM_66_19
soil	0.092538	12327	1660160	Bacteria	Acidobacteria	NA	NA	NA	NA	Acidobacteria bacterium SCN 69-37
soil	0.090621	12320	1137991	Bacteria	Actinobacteria	Actinobacteria	Geodermatophilales	Geodermatophilaceae	Geodermatophilus	Geodermatophilus siccatus
tomato	0.083423	12313	1736584	Bacteria	Proteobacteria	Alphaproteobacteria	Sphingomonadales	Erythrobacteraceae	Altererythrobacter	Altererythrobacter sp. Root672
soil	0.090555	12311	2030	Bacteria	Actinobacteria	Actinobacteria	Pseudonocardiales	Pseudonocardiaceae	Kibdelosporangium	Kibdelosporangium aridum
ruderals	0.073819	12293	1895838	Bacteria	Bacteroidetes	Sphingobacteriia	Sphingobacteriales	NA	NA	Sphingobacteriales bacterium 44-61
soil	0.089294	12289	113565	Bacteria	Actinobacteria	Actinobacteria	Micromonosporales	Micromonosporaceae	Actinoplanes	Actinoplanes globisporus
ruderals	0.074174	12278	1813736	Bacteria	Acidobacteria	NA	NA	NA	NA	Acidobacteria bacterium DSM 100886
tomato	0.082357	12264	1380391	Bacteria	Proteobacteria	Alphaproteobacteria	Rhodospirillales	Rhodospirillaceae	Dongia	Dongia sp. URHE0060
soil	0.08282	12264	1912961	Bacteria	Actinobacteria	Actinobacteria	Pseudonocardiales	Pseudonocardiaceae	Actinophytocola	Actinophytocola xanthii
ruderals	0.073632	12262	465721	Bacteria	Proteobacteria	Gammaproteobacteria	Nevskiales	Sinobacteraceae	Steroidobacter	Steroidobacter denitrificans
ruderals	0.07362	12260	191863	Bacteria	Verrucomicrobia	Spartobacteria	Chthoniobacterales	Chthoniobacteraceae	Chthoniobacter	Chthoniobacter flavus
soil	0.082766	12256	947013	Bacteria	Bacteroidetes	Cytophagia	Cytophagales	NA	Chryseolinea	Chryseolinea serpens
tomato	0.072754	12251	941907	Bacteria	Proteobacteria	Alphaproteobacteria	Sphingomonadales	Sphingomonadaceae	Sphingomonas	Sphingomonas indica
tomato	0.082996	12250	414050	Bacteria	Proteobacteria	Gammaproteobacteria	Xanthomonadales	Xanthomonadaceae	Lysobacter	Lysobacter dokdonensis
ruderals	0.073488	12238	1866	Bacteria	Actinobacteria	Actinobacteria	Micromonosporales	Micromonosporaceae	Actinoplanes	Actinoplanes missouriensis
tomato	0.085223	12237	191863	Bacteria	Verrucomicrobia	Spartobacteria	Chthoniobacterales	Chthoniobacteraceae	Chthoniobacter	Chthoniobacter flavus
ruderals	0.072991	12230	1895839	Bacteria	Bacteroidetes	Sphingobacteriia	Sphingobacteriales	NA	NA	Sphingobacteriales bacterium 46-32
soil	0.088865	12230	114	Bacteria	Planctomycetes	Planctomycetia	Planctomycetales	Gemmataceae	Gemmata	Gemmata obscuriglobus
soil	0.098255	12206	1895832	Bacteria	Actinobacteria	Thermoleophilia	Solirubrobacterales	NA	NA	Solirubrobacterales bacterium 67-14
ruderals	0.077576	12205	1235591	Bacteria	Proteobacteria	Alphaproteobacteria	Rhizobiales	NA	Pseudorhodoplanes	Pseudorhodoplanes sinuspersici
soil	0.089768	12204	393310	Bacteria	Proteobacteria	Alphaproteobacteria	Rhodospirillales	Rhodospirillaceae	Skermanella	Skermanella aerolata
ruderals	0.072782	12195	1895841	Bacteria	Bacteroidetes	Sphingobacteriia	Sphingobacteriales	NA	NA	Sphingobacteriales bacterium 50-39
ruderals	0.077321	12165	54	Bacteria	Proteobacteria	Deltaproteobacteria	Myxococcales	Nannocystaceae	Nannocystis	Nannocystis exedens
ruderals	0.072894	12139	1550231	Bacteria	Actinobacteria	Actinobacteria	Geodermatophilales	Geodermatophilaceae	Blastococcus	Blastococcus sp. DSM 44268
ruderals	0.073225	12121	1904640	Bacteria	Proteobacteria	Betaproteobacteria	NA	NA	NA	Betaproteobacteria bacterium GR16-43
tomato	0.071899	12107	1703345	Bacteria	Bacteroidetes	Chitinophagia	Chitinophagales	Chitinophagaceae	Niastella	Niastella vici
tomato	0.084311	12106	1855519	Bacteria	Proteobacteria	Alphaproteobacteria	Sphingomonadales	Sphingomonadaceae	Sphingobium	Sphingobium sp. EP60837
tomato	0.084241	12096	1379270	Bacteria	Gemmatimonadetes	Gemmatimonadetes	Gemmatimonadales	Gemmatimonadaceae	Gemmatimonas	Gemmatimonas phototrophica
soil	0.090578	12066	543632	Bacteria	Actinobacteria	Actinobacteria	Micromonosporales	Micromonosporaceae	Actinoplanes	Actinoplanes subtropicus
tomato	0.081715	12061	196914	Bacteria	Actinobacteria	Actinobacteria	Micromonosporales	Micromonosporaceae	Actinoplanes	Actinoplanes friuliensis
tomato	0.087506	12060	1396141	Bacteria	Verrucomicrobia	Verrucomicrobiae	Verrucomicrobiales	Verrucomicrobiaceae	Haloferula	Haloferula sp. BvORR071
ruderals	0.072832	12056	225324	Bacteria	Proteobacteria	Alphaproteobacteria	Rhodospirillales	NA	Enhydrobacter	Enhydrobacter aerosaccus
soil	0.088635	12050	433660	Bacteria	Actinobacteria	Actinobacteria	Propionibacteriales	Nocardioidaceae	Nocardioides	Nocardioides halotolerans
ruderals	0.072335	12046	186479	Bacteria	Chloroflexi	NA	NA	NA	Kouleothrix	Kouleothrix aurantiaca
soil	0.087528	12046	1267533	Bacteria	Acidobacteria	Acidobacteriia	Acidobacteriales	Acidobacteriaceae	NA	Acidobacteriaceae bacterium KBS 83
ruderals	0.072754	12043	95606	Bacteria	Proteobacteria	Alphaproteobacteria	Sphingomonadales	Sphingomonadaceae	NA	Sphingomonas-like bacterium B12
soil	0.090391	12041	1805166	Bacteria	Proteobacteria	Gammaproteobacteria	NA	NA	NA	Gammaproteobacteria bacterium 13_2_20CM_66_19
ruderals	0.100984	12035	1630693	Bacteria	Planctomycetes	Planctomycetia	Planctomycetales	Gemmataceae	Gemmata	Gemmata sp. SH-PL17
ruderals	0.07175	12022	688867	Bacteria	Bacteroidetes	Cytophagia	Cytophagales	Cytophagaceae	Ohtaekwangia	Ohtaekwangia koreensis
soil	0.088415	12020	1895832	Bacteria	Actinobacteria	Thermoleophilia	Solirubrobacterales	NA	NA	Solirubrobacterales bacterium 67-14
ruderals	0.072173	12019	1380393	Bacteria	Actinobacteria	Actinobacteria	Geodermatophilales	Geodermatophilaceae	NA	Geodermatophilaceae bacterium URHA0031
soil	0.096749	12019	125	Bacteria	Planctomycetes	Planctomycetia	Planctomycetales	Planctomycetaceae	Pirellula	Pirellula staleyi
tomato	0.087187	12016	1855519	Bacteria	Proteobacteria	Alphaproteobacteria	Sphingomonadales	Sphingomonadaceae	Sphingobium	Sphingobium sp. EP60837
tomato	0.080645	12009	1492898	Bacteria	Bacteroidetes	Chitinophagia	Chitinophagales	Chitinophagaceae	Flavisolibacter	Flavisolibacter sp. LCS9
ruderals	0.100724	12004	393310	Bacteria	Proteobacteria	Alphaproteobacteria	Rhodospirillales	Rhodospirillaceae	Skermanella	Skermanella aerolata
ruderals	0.100691	12000	482630	Bacteria	Cyanobacteria	NA	Nostocales	Tolypothrichaceae	Hassallia	Hassallia byssoidea
soil	0.087158	11995	1803494	Bacteria	Actinobacteria	NA	NA	NA	NA	Actinobacteria bacterium 13_2_20CM_2_71_6
soil	0.09646	11983	360055	Bacteria	Planctomycetes	Planctomycetia	Planctomycetales	Gemmataceae	Zavarzinella	Zavarzinella formosa
soil	0.088076	11974	1869	Bacteria	Actinobacteria	Actinobacteria	Micromonosporales	Micromonosporaceae	Actinoplanes	Actinoplanes utahensis
tomato	0.083364	11970	354355	Bacteria	Bacteroidetes	Chitinophagia	Chitinophagales	Chitinophagaceae	Niastella	Niastella yeongjuensis
ruderals	0.071867	11968	332163	Bacteria	Acidobacteria	Solibacteres	Solibacterales	Solibacteraceae	Candidatus Solibacter	Candidatus Solibacter usitatus
tomato	0.086744	11955	2350	Bacteria	Bacteroidetes	Saprospiria	Saprospirales	Haliscomenobacteraceae	Haliscomenobacter	Haliscomenobacter hydrossis
soil	0.087878	11947	1710355	Bacteria	Actinobacteria	Actinobacteria	Micromonosporales	Micromonosporaceae	Actinoplanes	Actinoplanes sp. TFC3
tomato	0.086664	11944	1895838	Bacteria	Bacteroidetes	Sphingobacteriia	Sphingobacteriales	NA	NA	Sphingobacteriales bacterium 44-61
ruderals	0.075853	11934	171674	Bacteria	Proteobacteria	Alphaproteobacteria	Rhodospirillales	Rhodospirillaceae	Inquilinus	Inquilinus limosus
ruderals	0.071633	11929	35754	Bacteria	Actinobacteria	Actinobacteria	Micromonosporales	Micromonosporaceae	Dactylosporangium	Dactylosporangium aurantiacum
tomato	0.08303	11922	191495	Bacteria	Actinobacteria	Thermoleophilia	Solirubrobacterales	Conexibacteraceae	Conexibacter	Conexibacter woesei
tomato	0.080767	11921	1895839	Bacteria	Bacteroidetes	Sphingobacteriia	Sphingobacteriales	NA	NA	Sphingobacteriales bacterium 46-32
soil	0.086576	11915	360054	Bacteria	Acidobacteria	Solibacteres	Solibacterales	Bryobacteraceae	Bryobacter	Bryobacter aggregatus
soil	0.087628	11913	135946	Bacteria	Actinobacteria	Actinobacteria	Micromonosporales	Micromonosporaceae	Actinoplanes	Actinoplanes awajinensis
tomato	0.07996	11907	393310	Bacteria	Proteobacteria	Alphaproteobacteria	Rhodospirillales	Rhodospirillaceae	Skermanella	Skermanella aerolata
soil	0.089084	11867	1895833	Bacteria	Actinobacteria	Thermoleophilia	Solirubrobacterales	NA	NA	Solirubrobacterales bacterium 70-9
soil	0.087282	11866	1617423	Bacteria	Acidobacteria	NA	NA	NA	NA	Acidobacteria bacterium OLB17
ruderals	0.075377	11859	1380389	Bacteria	Proteobacteria	Alphaproteobacteria	Sphingomonadales	Sphingomonadaceae	Sphingomonas	Sphingomonas sp. URHD0057
soil	0.081008	11833	1660160	Bacteria	Acidobacteria	NA	NA	NA	NA	Acidobacteria bacterium SCN 69-37
soil	0.085864	11817	1803431	Bacteria	Acidobacteria	NA	NA	NA	NA	Acidobacteria bacterium 13_1_20CM_3_53_8
soil	0.086892	11813	864069	Bacteria	Proteobacteria	Alphaproteobacteria	Rhizobiales	Methylobacteriaceae	Microvirga	Microvirga lotononidis
ruderals	0.070395	11795	402650	Bacteria	Actinobacteria	Actinobacteria	Pseudonocardiales	Pseudonocardiaceae	Actinomycetospora	Actinomycetospora chiangmaiensis
ruderals	0.071238	11792	392734	Bacteria	Acidobacteria	Acidobacteriia	Acidobacteriales	Acidobacteriaceae	Terriglobus	Terriglobus roseus
tomato	0.081818	11748	186479	Bacteria	Chloroflexi	NA	NA	NA	Kouleothrix	Kouleothrix aurantiaca
tomato	0.085024	11718	1660163	Bacteria	Gemmatimonadetes	NA	NA	NA	NA	Gemmatimonadetes bacterium SCN 70-22
tomato	0.085024	11718	1391654	Bacteria	Proteobacteria	Deltaproteobacteria	Myxococcales	Labilitrichaceae	Labilithrix	Labilithrix luteola
soil	0.087913	11711	35754	Bacteria	Actinobacteria	Actinobacteria	Micromonosporales	Micromonosporaceae	Dactylosporangium	Dactylosporangium aurantiacum
soil	0.079072	11709	1895841	Bacteria	Bacteroidetes	Sphingobacteriia	Sphingobacteriales	NA	NA	Sphingobacteriales bacterium 50-39
tomato	0.079242	11696	191863	Bacteria	Verrucomicrobia	Spartobacteria	Chthoniobacterales	Chthoniobacteraceae	Chthoniobacter	Chthoniobacter flavus
soil	0.079988	11684	722472	Bacteria	Proteobacteria	Alphaproteobacteria	Rhizobiales	Bradyrhizobiaceae	Bradyrhizobium	Bradyrhizobium lablabi
ruderals	0.069673	11674	80871	Bacteria	Actinobacteria	Actinobacteria	Frankiales	Cryptosporangiaceae	Cryptosporangium	Cryptosporangium arvum
tomato	0.069274	11665	56438	Bacteria	Actinobacteria	Actinobacteria	Micromonosporales	Micromonosporaceae	Couchioplanes	Couchioplanes caeruleus
tomato	0.08464	11665	688867	Bacteria	Bacteroidetes	Cytophagia	Cytophagales	Cytophagaceae	Ohtaekwangia	Ohtaekwangia koreensis
tomato	0.069179	11649	888845	Bacteria	Proteobacteria	Deltaproteobacteria	Myxococcales	NA	Minicystis	Minicystis rosea
tomato	0.078836	11636	1235591	Bacteria	Proteobacteria	Alphaproteobacteria	Rhizobiales	NA	Pseudorhodoplanes	Pseudorhodoplanes sinuspersici
ruderals	0.09751	11621	68170	Bacteria	Actinobacteria	Actinobacteria	Pseudonocardiales	Pseudonocardiaceae	Lechevalieria	Lechevalieria aerocolonigenes
soil	0.084309	11603	1895841	Bacteria	Bacteroidetes	Sphingobacteriia	Sphingobacteriales	NA	NA	Sphingobacteriales bacterium 50-39
ruderals	0.073699	11595	35754	Bacteria	Actinobacteria	Actinobacteria	Micromonosporales	Micromonosporaceae	Dactylosporangium	Dactylosporangium aurantiacum
ruderals	0.07354	11570	485602	Bacteria	Actinobacteria	Actinobacteria	Pseudonocardiales	Pseudonocardiaceae	Actinophytocola	Actinophytocola xinjiangensis
ruderals	0.069034	11567	1803507	Bacteria	Proteobacteria	Alphaproteobacteria	NA	NA	NA	Alphaproteobacteria bacterium 13_2_20CM_2_64_7
soil	0.079098	11554	927083	Bacteria	Proteobacteria	Deltaproteobacteria	Myxococcales	Sandaracinaceae	Sandaracinus	Sandaracinus amylolyticus
soil	0.084877	11539	1137993	Bacteria	Actinobacteria	Actinobacteria	Geodermatophilales	Geodermatophilaceae	Geodermatophilus	Geodermatophilus africanus
soil	0.07791	11537	543632	Bacteria	Actinobacteria	Actinobacteria	Micromonosporales	Micromonosporaceae	Actinoplanes	Actinoplanes subtropicus
ruderals	0.069255	11533	398037	Bacteria	Bacteroidetes	Chitinophagia	Chitinophagales	Chitinophagaceae	Segetibacter	Segetibacter koreensis
soil	0.083699	11519	1803481	Bacteria	Actinobacteria	NA	NA	NA	NA	Actinobacteria bacterium 13_1_20CM_4_69_9
soil	0.086202	11483	29539	Bacteria	Actinobacteria	Thermoleophilia	Thermoleophilales	Thermoleophilaceae	Thermoleophilum	Thermoleophilum album
soil	0.084317	11463	114	Bacteria	Planctomycetes	Planctomycetia	Planctomycetales	Gemmataceae	Gemmata	Gemmata obscuriglobus
soil	0.084288	11459	1912961	Bacteria	Actinobacteria	Actinobacteria	Pseudonocardiales	Pseudonocardiaceae	Actinophytocola	Actinophytocola xanthii
tomato	0.083145	11459	1437360	Bacteria	Proteobacteria	Alphaproteobacteria	Rhizobiales	Bradyrhizobiaceae	Bradyrhizobium	Bradyrhizobium erythrophlei
tomato	0.07977	11454	107709	Bacteria	Verrucomicrobia	Opitutae	Opitutales	Opitutaceae	Opitutus	Opitutus terrae
ruderals	0.06878	11454	1985174	Bacteria	Bacteroidetes	Chitinophagia	Chitinophagales	Chitinophagaceae	NA	Chitinophagaceae bacterium IBVUCB2
ruderals	0.068342	11451	1500261	Bacteria	Proteobacteria	Betaproteobacteria	Burkholderiales	NA	Methylibium	Methylibium sp. CF059
ruderals	0.096042	11446	1380391	Bacteria	Proteobacteria	Alphaproteobacteria	Rhodospirillales	Rhodospirillaceae	Dongia	Dongia sp. URHE0060
soil	0.079064	9822	1459637	Archaea	Thaumarchaeota	Nitrososphaeria	Nitrososphaerales	Nitrososphaeraceae	Nitrososphaera	Candidatus Nitrososphaera evergladensis
tomato	0.077542	11445	1736466	Bacteria	Proteobacteria	Alphaproteobacteria	Rhizobiales	Xanthobacteraceae	Pseudolabrys	Pseudolabrys sp. Root1462
tomato	0.083007	11440	1798290	Bacteria	Proteobacteria	Gammaproteobacteria	NA	NA	NA	Gammaproteobacteria bacterium RIFCSPHIGHO2_12_FULL_63_22
soil	0.07829	11436	1617423	Bacteria	Acidobacteria	NA	NA	NA	NA	Acidobacteria bacterium OLB17
ruderals	0.072675	11434	1691979	Bacteria	Bacteroidetes	Chitinophagia	Chitinophagales	Chitinophagaceae	NA	Chitinophagaceae bacterium PMP191F
ruderals	0.068169	11422	1691979	Bacteria	Bacteroidetes	Chitinophagia	Chitinophagales	Chitinophagaceae	NA	Chitinophagaceae bacterium PMP191F
soil	0.0837	11379	360055	Bacteria	Planctomycetes	Planctomycetia	Planctomycetales	Gemmataceae	Zavarzinella	Zavarzinella formosa
ruderals	0.068312	11376	477641	Bacteria	Actinobacteria	Actinobacteria	Geodermatophilales	Geodermatophilaceae	Modestobacter	Modestobacter marinus
ruderals	0.068724	11376	1803453	Bacteria	Acidobacteria	NA	NA	NA	NA	Acidobacteria bacterium 13_1_40CM_4_58_4
soil	0.083655	11373	49319	Bacteria	Actinobacteria	Rubrobacteria	Rubrobacterales	Rubrobacteraceae	Rubrobacter	Rubrobacter xylanophilus
ruderals	0.068276	11370	1225564	Bacteria	Proteobacteria	Alphaproteobacteria	Rhizobiales	Methylobacteriaceae	Microvirga	Microvirga vignae
soil	0.082595	11367	186479	Bacteria	Chloroflexi	NA	NA	NA	Kouleothrix	Kouleothrix aurantiaca
soil	0.082558	11362	1380394	Bacteria	Proteobacteria	Alphaproteobacteria	Rhodospirillales	NA	NA	Rhodospirillales bacterium URHD0088
soil	0.083501	11352	1803507	Bacteria	Proteobacteria	Alphaproteobacteria	NA	NA	NA	Alphaproteobacteria bacterium 13_2_20CM_2_64_7
soil	0.077715	11352	125	Bacteria	Planctomycetes	Planctomycetia	Planctomycetales	Planctomycetaceae	Pirellula	Pirellula staleyi
tomato	0.078948	11336	1660160	Bacteria	Acidobacteria	NA	NA	NA	NA	Acidobacteria bacterium SCN 69-37
soil	0.091042	11310	420324	Bacteria	Proteobacteria	Alphaproteobacteria	Rhizobiales	Methylobacteriaceae	Microvirga	Microvirga lupini
tomato	0.078642	11292	1895841	Bacteria	Bacteroidetes	Sphingobacteriia	Sphingobacteriales	NA	NA	Sphingobacteriales bacterium 50-39
ruderals	0.071703	11281	1866	Bacteria	Actinobacteria	Actinobacteria	Micromonosporales	Micromonosporaceae	Actinoplanes	Actinoplanes missouriensis
soil	0.076168	11279	75922	Bacteria	Actinobacteria	Actinobacteria	Corynebacteriales	Mycobacteriaceae	Mycobacterium	Mycobacterium tusciae
soil	0.084603	11270	1391654	Bacteria	Proteobacteria	Deltaproteobacteria	Myxococcales	Labilitrichaceae	Labilithrix	Labilithrix luteola
soil	0.08452	11259	360055	Bacteria	Planctomycetes	Planctomycetia	Planctomycetales	Gemmataceae	Zavarzinella	Zavarzinella formosa
soil	0.07701	11249	354356	Bacteria	Bacteroidetes	Chitinophagia	Chitinophagales	Chitinophagaceae	Niastella	Niastella koreensis
tomato	0.0754	11228	465721	Bacteria	Proteobacteria	Gammaproteobacteria	Nevskiales	Sinobacteraceae	Steroidobacter	Steroidobacter denitrificans
tomato	0.075997	11217	155892	Bacteria	Proteobacteria	Alphaproteobacteria	Caulobacterales	Caulobacteraceae	Caulobacter	Caulobacter vibrioides
ruderals	0.071194	11201	536979	Bacteria	Bacteroidetes	Chitinophagia	Chitinophagales	Chitinophagaceae	Chitinophaga	Chitinophaga niabensis
ruderals	0.071188	11200	107709	Bacteria	Verrucomicrobia	Opitutae	Opitutales	Opitutaceae	Opitutus	Opitutus terrae
soil	0.081359	11197	1799662	Bacteria	Proteobacteria	Betaproteobacteria	NA	NA	NA	Betaproteobacteria bacterium SCGC AG-212-J23
tomato	0.08107	11173	186479	Bacteria	Chloroflexi	NA	NA	NA	Kouleothrix	Kouleothrix aurantiaca
tomato	0.075645	11165	888845	Bacteria	Proteobacteria	Deltaproteobacteria	Myxococcales	NA	Minicystis	Minicystis rosea
ruderals	0.066575	11155	135946	Bacteria	Actinobacteria	Actinobacteria	Micromonosporales	Micromonosporaceae	Actinoplanes	Actinoplanes awajinensis
soil	0.081964	11143	113571	Bacteria	Actinobacteria	Actinobacteria	Micromonosporales	Micromonosporaceae	Actinoplanes	Actinoplanes rectilineatus
soil	0.075229	11140	137265	Bacteria	Actinobacteria	Actinobacteria	Micromonosporales	Micromonosporaceae	Asanoa	Asanoa ishikariensis
soil	0.083604	11137	1660163	Bacteria	Gemmatimonadetes	NA	NA	NA	NA	Gemmatimonadetes bacterium SCN 70-22
tomato	0.066109	11132	393310	Bacteria	Proteobacteria	Alphaproteobacteria	Rhodospirillales	Rhodospirillaceae	Skermanella	Skermanella aerolata
ruderals	0.070711	11125	2074	Bacteria	Actinobacteria	Actinobacteria	Pseudonocardiales	Pseudonocardiaceae	Pseudonocardia	Pseudonocardia autotrophica
ruderals	0.067202	11124	1267534	Bacteria	Acidobacteria	Acidobacteriia	Acidobacteriales	Acidobacteriaceae	NA	Acidobacteriaceae bacterium KBS 89
ruderals	0.06636	11119	56438	Bacteria	Actinobacteria	Actinobacteria	Micromonosporales	Micromonosporaceae	Couchioplanes	Couchioplanes caeruleus
soil	0.0894	11106	674703	Bacteria	Proteobacteria	Alphaproteobacteria	Rhizobiales	Hyphomicrobiaceae	Rhodoplanes	Rhodoplanes sp. Z2-YC6860
soil	0.074986	11104	1235591	Bacteria	Proteobacteria	Alphaproteobacteria	Rhizobiales	NA	Pseudorhodoplanes	Pseudorhodoplanes sinuspersici
tomato	0.065895	11096	1895714	Bacteria	Proteobacteria	Alphaproteobacteria	Sphingomonadales	Erythrobacteraceae	Altererythrobacter	Altererythrobacter sp. 66-12
ruderals	0.066613	11093	1895832	Bacteria	Actinobacteria	Thermoleophilia	Solirubrobacterales	NA	NA	Solirubrobacterales bacterium 67-14
soil	0.074858	11085	125	Bacteria	Planctomycetes	Planctomycetia	Planctomycetales	Planctomycetaceae	Pirellula	Pirellula staleyi
tomato	0.065782	11077	35752	Bacteria	Actinobacteria	Actinobacteria	Micromonosporales	Micromonosporaceae	Actinoplanes	Actinoplanes philippinensis
ruderals	0.076252	12622	39966	Eukaryota	Basidiomycota	Agaricomycetes	Agaricales	Lyophyllaceae	Hypsizygus	Hypsizygus marmoreus
soil	0.081478	11077	1797182	Bacteria	Acidobacteria	NA	NA	NA	NA	Acidobacteria bacterium RIFCSPLOWO2_02_FULL_65_29
soil	0.080451	11072	1380391	Bacteria	Proteobacteria	Alphaproteobacteria	Rhodospirillales	Rhodospirillaceae	Dongia	Dongia sp. URHE0060
tomato	0.074292	11063	1803481	Bacteria	Actinobacteria	NA	NA	NA	NA	Actinobacteria bacterium 13_1_20CM_4_69_9
soil	0.083034	11061	1904640	Bacteria	Proteobacteria	Betaproteobacteria	NA	NA	NA	Betaproteobacteria bacterium GR16-43
ruderals	0.066402	11058	1660160	Bacteria	Acidobacteria	NA	NA	NA	NA	Acidobacteria bacterium SCN 69-37
soil	0.075688	11056	1703345	Bacteria	Bacteroidetes	Chitinophagia	Chitinophagales	Chitinophagaceae	Niastella	Niastella vici
ruderals	0.070241	11051	1465490	Bacteria	Bacteroidetes	Chitinophagia	Chitinophagales	Chitinophagaceae	Parafilimonas	Parafilimonas terrae
ruderals	0.066342	11048	504800	Bacteria	Actinobacteria	Actinobacteria	Geodermatophilales	Geodermatophilaceae	Geodermatophilus	Geodermatophilus ruber
tomato	0.076929	11046	173480	Bacteria	Gemmatimonadetes	Gemmatimonadetes	Gemmatimonadales	Gemmatimonadaceae	Gemmatimonas	Gemmatimonas aurantiaca
soil	0.080219	11040	1803468	Bacteria	Acidobacteria	Acidobacteriia	Acidobacteriales	NA	NA	Acidobacteriales bacterium 13_1_40CM_3_55_5
ruderals	0.092619	11038	80816	Bacteria	Proteobacteria	Deltaproteobacteria	Myxococcales	Kofleriaceae	Haliangium	Haliangium ochraceum
ruderals	0.065829	11030	134849	Bacteria	Actinobacteria	Actinobacteria	Frankiales	Cryptosporangiaceae	Cryptosporangium	Cryptosporangium aurantiacum
tomato	0.079902	11012	1895753	Bacteria	Proteobacteria	Alphaproteobacteria	Rhizobiales	Hyphomicrobiaceae	Devosia	Devosia sp. 66-22
soil	0.074351	11010	1803462	Bacteria	Acidobacteria	NA	NA	NA	NA	Acidobacteria bacterium 13_2_20CM_2_66_4
ruderals	0.066084	11005	94132	Bacteria	Proteobacteria	Betaproteobacteria	Burkholderiales	Comamonadaceae	Ramlibacter	Ramlibacter tataouinensis
tomato	0.074547	11003	1703345	Bacteria	Bacteroidetes	Chitinophagia	Chitinophagales	Chitinophagaceae	Niastella	Niastella vici
soil	0.08845	10988	1805166	Bacteria	Proteobacteria	Gammaproteobacteria	NA	NA	NA	Gammaproteobacteria bacterium 13_2_20CM_66_19
ruderals	0.069802	10982	125	Bacteria	Planctomycetes	Planctomycetia	Planctomycetales	Planctomycetaceae	Pirellula	Pirellula staleyi
tomato	0.065188	10977	364039	Bacteria	Proteobacteria	Betaproteobacteria	Burkholderiales	Alcaligenaceae	Azohydromonas	Azohydromonas australica
soil	0.088321	10972	1904967	Bacteria	Actinobacteria	Actinobacteria	Pseudonocardiales	Pseudonocardiaceae	Pseudonocardia	Pseudonocardia sp. CNS-004
soil	0.073993	10957	927083	Bacteria	Proteobacteria	Deltaproteobacteria	Myxococcales	Sandaracinaceae	Sandaracinus	Sandaracinus amylolyticus
soil	0.080588	10956	332163	Bacteria	Acidobacteria	Solibacteres	Solibacterales	Solibacteraceae	Candidatus Solibacter	Candidatus Solibacter usitatus
soil	0.088152	10951	1803447	Bacteria	Acidobacteria	NA	NA	NA	NA	Acidobacteria bacterium 13_1_40CM_3_55_6
soil	0.082156	10944	1703345	Bacteria	Bacteroidetes	Chitinophagia	Chitinophagales	Chitinophagaceae	Niastella	Niastella vici
tomato	0.064873	10924	1803447	Bacteria	Acidobacteria	NA	NA	NA	NA	Acidobacteria bacterium 13_1_40CM_3_55_6
tomato	0.079227	10919	1797662	Bacteria	Chloroflexi	NA	NA	NA	NA	Chloroflexi bacterium RBG_16_70_13
soil	0.087855	10914	1617423	Bacteria	Acidobacteria	NA	NA	NA	NA	Acidobacteria bacterium OLB17
soil	0.079267	10909	1577686	Bacteria	Acidobacteria	Acidobacteriia	Acidobacteriales	Acidobacteriaceae	Silvibacterium	Silvibacterium bohemicum
tomato	0.079132	10906	462367	Bacteria	Bacteroidetes	Chitinophagia	Chitinophagales	Chitinophagaceae	Flavisolibacter	Flavisolibacter ginsengisoli
tomato	0.064755	10904	1032527	Bacteria	Verrucomicrobia	Verrucomicrobiae	Verrucomicrobiales	Verrucomicrobia subdivision 3	Pedosphaera	Pedosphaera parvula
tomato	0.075926	10902	398037	Bacteria	Bacteroidetes	Chitinophagia	Chitinophagales	Chitinophagaceae	Segetibacter	Segetibacter koreensis
soil	0.087718	10897	1660160	Bacteria	Acidobacteria	NA	NA	NA	NA	Acidobacteria bacterium SCN 69-37
soil	0.073575	10895	1803434	Bacteria	Acidobacteria	NA	NA	NA	NA	Acidobacteria bacterium 13_1_20CM_4_56_7
soil	0.079934	10867	1522368	Bacteria	Actinobacteria	Actinobacteria	Geodermatophilales	Geodermatophilaceae	Modestobacter	Modestobacter caceresii
soil	0.074306	10854	1235591	Bacteria	Proteobacteria	Alphaproteobacteria	Rhizobiales	NA	Pseudorhodoplanes	Pseudorhodoplanes sinuspersici
tomato	0.07351	10850	1379270	Bacteria	Gemmatimonadetes	Gemmatimonadetes	Gemmatimonadales	Gemmatimonadaceae	Gemmatimonas	Gemmatimonas phototrophica
ruderals	0.065135	10847	125	Bacteria	Planctomycetes	Planctomycetia	Planctomycetales	Planctomycetaceae	Pirellula	Pirellula staleyi
ruderals	0.090949	10839	1895753	Bacteria	Proteobacteria	Alphaproteobacteria	Rhizobiales	Hyphomicrobiaceae	Devosia	Devosia sp. 66-22
ruderals	0.090932	10837	332163	Bacteria	Acidobacteria	Solibacteres	Solibacterales	Solibacteraceae	Candidatus Solibacter	Candidatus Solibacter usitatus
ruderals	0.068779	10821	1032527	Bacteria	Verrucomicrobia	Verrucomicrobiae	Verrucomicrobiales	Verrucomicrobia subdivision 3	Pedosphaera	Pedosphaera parvula
ruderals	0.090781	10819	861299	Bacteria	Gemmatimonadetes	Gemmatimonadetes	Gemmatimonadales	Gemmatimonadaceae	Gemmatirosa	Gemmatirosa kalamazoonesis
soil	0.073061	10819	29539	Bacteria	Actinobacteria	Thermoleophilia	Thermoleophilales	Thermoleophilaceae	Thermoleophilum	Thermoleophilum album
soil	0.081142	10809	393310	Bacteria	Proteobacteria	Alphaproteobacteria	Rhodospirillales	Rhodospirillaceae	Skermanella	Skermanella aerolata
tomato	0.073172	10800	173480	Bacteria	Gemmatimonadetes	Gemmatimonadetes	Gemmatimonadales	Gemmatimonadaceae	Gemmatimonas	Gemmatimonas aurantiaca
soil	0.079419	10797	1380356	Bacteria	Actinobacteria	Actinobacteria	Geodermatophilales	Geodermatophilaceae	Blastococcus	Blastococcus sp. URHD0036
ruderals	0.090504	10786	1703345	Bacteria	Bacteroidetes	Chitinophagia	Chitinophagales	Chitinophagaceae	Niastella	Niastella vici
soil	0.078286	10774	1805056	Bacteria	Chloroflexi	NA	NA	NA	NA	Chloroflexi bacterium 13_1_20CM_2_59_7
ruderals	0.068474	10773	1803507	Bacteria	Proteobacteria	Alphaproteobacteria	NA	NA	NA	Alphaproteobacteria bacterium 13_2_20CM_2_64_7
ruderals	0.064955	10752	278963	Bacteria	Acidobacteria	Acidobacteriia	Acidobacteriales	Acidobacteriaceae	NA	Acidobacteriaceae bacterium TAA166
tomato	0.074812	10742	1630693	Bacteria	Planctomycetes	Planctomycetia	Planctomycetales	Gemmataceae	Gemmata	Gemmata sp. SH-PL17
soil	0.078882	10724	1803447	Bacteria	Acidobacteria	NA	NA	NA	NA	Acidobacteria bacterium 13_1_40CM_3_55_6
soil	0.086317	10723	1799662	Bacteria	Proteobacteria	Betaproteobacteria	NA	NA	NA	Betaproteobacteria bacterium SCGC AG-212-J23
tomato	0.074672	10722	1500261	Bacteria	Proteobacteria	Betaproteobacteria	Burkholderiales	NA	Methylibium	Methylibium sp. CF059
tomato	0.074422	10686	482630	Bacteria	Cyanobacteria	NA	Nostocales	Tolypothrichaceae	Hassallia	Hassallia byssoidea
tomato	0.071747	10684	1033741	Bacteria	Proteobacteria	Alphaproteobacteria	Rhizobiales	Methylobacteriaceae	Microvirga	Microvirga massiliensis
soil	0.072096	10676	485602	Bacteria	Actinobacteria	Actinobacteria	Pseudonocardiales	Pseudonocardiaceae	Actinophytocola	Actinophytocola xinjiangensis
tomato	0.071646	10669	1797501	Bacteria	Proteobacteria	Betaproteobacteria	NA	NA	NA	Betaproteobacteria bacterium RIFCSPLOWO2_12_FULL_65_14
ruderals	0.064399	10660	44255	Bacteria	Proteobacteria	Alphaproteobacteria	Rhizobiales	Bradyrhizobiaceae	Bradyrhizobium	Bradyrhizobium oligotrophicum
ruderals	0.089396	10654	113565	Bacteria	Actinobacteria	Actinobacteria	Micromonosporales	Micromonosporaceae	Actinoplanes	Actinoplanes globisporus
soil	0.079941	10649	114	Bacteria	Planctomycetes	Planctomycetia	Planctomycetales	Gemmataceae	Gemmata	Gemmata obscuriglobus
tomato	0.063193	10641	1500261	Bacteria	Proteobacteria	Betaproteobacteria	Burkholderiales	NA	Methylibium	Methylibium sp. CF059
ruderals	0.063862	10635	1660163	Bacteria	Gemmatimonadetes	NA	NA	NA	NA	Gemmatimonadetes bacterium SCN 70-22
tomato	0.077137	10631	1797501	Bacteria	Proteobacteria	Betaproteobacteria	NA	NA	NA	Betaproteobacteria bacterium RIFCSPLOWO2_12_FULL_65_14
soil	0.07167	10613	360055	Bacteria	Planctomycetes	Planctomycetia	Planctomycetales	Gemmataceae	Zavarzinella	Zavarzinella formosa
tomato	0.071143	10594	1119528	Bacteria	Proteobacteria	Betaproteobacteria	Rhodocyclales	Rhodocyclaceae	Methyloversatilis	Methyloversatilis discipulorum
ruderals	0.067311	10590	1848	Bacteria	Actinobacteria	Actinobacteria	Pseudonocardiales	Pseudonocardiaceae	Pseudonocardia	Pseudonocardia thermophila
ruderals	0.067298	10588	1660163	Bacteria	Gemmatimonadetes	NA	NA	NA	NA	Gemmatimonadetes bacterium SCN 70-22
tomato	0.071062	10582	1032527	Bacteria	Verrucomicrobia	Verrucomicrobiae	Verrucomicrobiales	Verrucomicrobia subdivision 3	Pedosphaera	Pedosphaera parvula
ruderals	0.063873	10573	255045	Bacteria	Proteobacteria	Alphaproteobacteria	Rhizobiales	Bradyrhizobiaceae	Bradyrhizobium	Bradyrhizobium canariense
ruderals	0.063424	10562	649831	Bacteria	Actinobacteria	Actinobacteria	Micromonosporales	Micromonosporaceae	Actinoplanes	Actinoplanes sp. N902-109
ruderals	0.062959	10549	35754	Bacteria	Actinobacteria	Actinobacteria	Micromonosporales	Micromonosporaceae	Dactylosporangium	Dactylosporangium aurantiacum
soil	0.07916	10545	125	Bacteria	Planctomycetes	Planctomycetia	Planctomycetales	Planctomycetaceae	Pirellula	Pirellula staleyi
tomato	0.076477	10540	407019	Bacteria	Proteobacteria	Alphaproteobacteria	Sphingomonadales	Sphingomonadaceae	Sphingomonas	Sphingomonas astaxanthinifaciens
ruderals	0.062893	10538	1302690	Bacteria	Bacteroidetes	Chitinophagia	Chitinophagales	Chitinophagaceae	Cnuella	Cnuella takakiae
ruderals	0.063644	10535	1380394	Bacteria	Proteobacteria	Alphaproteobacteria	Rhodospirillales	NA	NA	Rhodospirillales bacterium URHD0088
soil	0.076542	10534	1803462	Bacteria	Acidobacteria	NA	NA	NA	NA	Acidobacteria bacterium 13_2_20CM_2_66_4
soil	0.076469	10524	927083	Bacteria	Proteobacteria	Deltaproteobacteria	Myxococcales	Sandaracinaceae	Sandaracinus	Sandaracinus amylolyticus
ruderals	0.063541	10518	1617423	Bacteria	Acidobacteria	NA	NA	NA	NA	Acidobacteria bacterium OLB17
ruderals	0.066853	10518	35752	Bacteria	Actinobacteria	Actinobacteria	Micromonosporales	Micromonosporaceae	Actinoplanes	Actinoplanes philippinensis
ruderals	0.063517	10514	407019	Bacteria	Proteobacteria	Alphaproteobacteria	Sphingomonadales	Sphingomonadaceae	Sphingomonas	Sphingomonas astaxanthinifaciens
tomato	0.073147	10503	864051	Bacteria	Proteobacteria	Betaproteobacteria	Burkholderiales	NA	NA	Burkholderiales bacterium JOSHI_001
ruderals	0.062896	10474	1380391	Bacteria	Proteobacteria	Alphaproteobacteria	Rhodospirillales	Rhodospirillaceae	Dongia	Dongia sp. URHE0060
ruderals	0.062896	10474	1736365	Bacteria	Proteobacteria	Betaproteobacteria	Burkholderiales	Comamonadaceae	Ramlibacter	Ramlibacter sp. Leaf400
soil	0.070678	10466	1660160	Bacteria	Acidobacteria	NA	NA	NA	NA	Acidobacteria bacterium SCN 69-37
ruderals	0.063215	10464	2074	Bacteria	Actinobacteria	Actinobacteria	Pseudonocardiales	Pseudonocardiaceae	Pseudonocardia	Pseudonocardia autotrophica
soil	0.084224	10463	68170	Bacteria	Actinobacteria	Actinobacteria	Pseudonocardiales	Pseudonocardiaceae	Lechevalieria	Lechevalieria aerocolonigenes
soil	0.070603	10455	1933817	Bacteria	Actinobacteria	Actinobacteria	Propionibacteriales	Nocardioidaceae	Kribbella	Kribbella sp. ALI-6-A
tomato	0.070162	10448	332163	Bacteria	Acidobacteria	Solibacteres	Solibacterales	Solibacteraceae	Candidatus Solibacter	Candidatus Solibacter usitatus
tomato	0.0757	10433	191863	Bacteria	Verrucomicrobia	Spartobacteria	Chthoniobacterales	Chthoniobacteraceae	Chthoniobacter	Chthoniobacter flavus
tomato	0.075657	10427	454194	Bacteria	Acidobacteria	Blastocatellia	NA	NA	Pyrinomonas	Pyrinomonas methylaliphatogenes
tomato	0.06982	10397	510946	Bacteria	Bacteroidetes	Flavobacteriia	Flavobacteriales	Flavobacteriaceae	Flavobacterium	Flavobacterium cauense
tomato	0.061732	10395	1904640	Bacteria	Proteobacteria	Betaproteobacteria	NA	NA	NA	Betaproteobacteria bacterium GR16-43
soil	0.078004	10391	482630	Bacteria	Cyanobacteria	NA	Nostocales	Tolypothrichaceae	Hassallia	Hassallia byssoidea
ruderals	0.087055	10375	1617415	Bacteria	Chloroflexi	NA	NA	NA	NA	Chloroflexi bacterium OLB14
ruderals	0.061914	10374	1032527	Bacteria	Verrucomicrobia	Verrucomicrobiae	Verrucomicrobiales	Verrucomicrobia subdivision 3	Pedosphaera	Pedosphaera parvula
soil	0.083492	10372	1803507	Bacteria	Proteobacteria	Alphaproteobacteria	NA	NA	NA	Alphaproteobacteria bacterium 13_2_20CM_2_64_7
soil	0.075132	10340	1736466	Bacteria	Proteobacteria	Alphaproteobacteria	Rhizobiales	Xanthobacteraceae	Pseudolabrys	Pseudolabrys sp. Root1462
ruderals	0.065671	10332	1736466	Bacteria	Proteobacteria	Alphaproteobacteria	Rhizobiales	Xanthobacteraceae	Pseudolabrys	Pseudolabrys sp. Root1462
tomato	0.069303	10320	1123067	Bacteria	Proteobacteria	Alphaproteobacteria	Rhodobacterales	Rhodobacteraceae	Rubellimicrobium	Rubellimicrobium mesophilum
ruderals	0.061953	10317	2074	Bacteria	Actinobacteria	Actinobacteria	Pseudonocardiales	Pseudonocardiaceae	Pseudonocardia	Pseudonocardia autotrophica
soil	0.070581	10310	1803447	Bacteria	Acidobacteria	NA	NA	NA	NA	Acidobacteria bacterium 13_1_40CM_3_55_6
soil	0.077389	10309	191863	Bacteria	Verrucomicrobia	Spartobacteria	Chthoniobacterales	Chthoniobacteraceae	Chthoniobacter	Chthoniobacter flavus
tomato	0.061221	10309	1380357	Bacteria	Proteobacteria	Alphaproteobacteria	Rhodospirillales	NA	NA	Rhodospirillales bacterium URHD0017
ruderals	0.061761	10285	1848	Bacteria	Actinobacteria	Actinobacteria	Pseudonocardiales	Pseudonocardiaceae	Pseudonocardia	Pseudonocardia thermophila
tomato	0.069649	10280	1803447	Bacteria	Acidobacteria	NA	NA	NA	NA	Acidobacteria bacterium 13_1_40CM_3_55_6
tomato	0.074583	10279	1736434	Bacteria	Proteobacteria	Betaproteobacteria	Burkholderiales	Comamonadaceae	Pelomonas	Pelomonas sp. Root1237
soil	0.077126	10274	56438	Bacteria	Actinobacteria	Actinobacteria	Micromonosporales	Micromonosporaceae	Couchioplanes	Couchioplanes caeruleus
ruderals	0.065232	10263	1799655	Bacteria	Proteobacteria	Alphaproteobacteria	Micropepsales	Micropepsaceae	Rhizomicrobium	Rhizomicrobium sp. SCGC AG-212-E05
soil	0.082582	10259	1805354	Bacteria	Candidatus Rokubacteria	NA	NA	NA	NA	Candidatus Rokubacteria bacterium 13_1_40CM_2_68_8
soil	0.069965	10220	1076	Bacteria	Proteobacteria	Alphaproteobacteria	Rhizobiales	Bradyrhizobiaceae	Rhodopseudomonas	Rhodopseudomonas palustris
soil	0.0741	10198	1382359	Bacteria	Acidobacteria	Acidobacteriia	Acidobacteriales	Acidobacteriaceae	Acidobacterium	Acidobacterium ailaaui
tomato	0.060526	10192	241425	Bacteria	Cyanobacteria	NA	Oscillatoriales	Gomontiellaceae	Crinalium	Crinalium epipsammum
ruderals	0.064628	10168	1803431	Bacteria	Acidobacteria	NA	NA	NA	NA	Acidobacteria bacterium 13_1_20CM_3_53_8
tomato	0.060271	10149	927083	Bacteria	Proteobacteria	Deltaproteobacteria	Myxococcales	Sandaracinaceae	Sandaracinus	Sandaracinus amylolyticus
soil	0.074645	10148	1550230	Bacteria	Actinobacteria	Actinobacteria	Geodermatophilales	Geodermatophilaceae	Modestobacter	Modestobacter sp. DSM 44400
soil	0.068483	10141	107709	Bacteria	Verrucomicrobia	Opitutae	Opitutales	Opitutaceae	Opitutus	Opitutus terrae
ruderals	0.064368	10127	1076	Bacteria	Proteobacteria	Alphaproteobacteria	Rhizobiales	Bradyrhizobiaceae	Rhodopseudomonas	Rhodopseudomonas palustris
tomato	0.073458	10124	1380390	Bacteria	Actinobacteria	Thermoleophilia	Solirubrobacterales	NA	NA	Solirubrobacterales bacterium URHD0059
ruderals	0.060368	10115	125	Bacteria	Planctomycetes	Planctomycetia	Planctomycetales	Planctomycetaceae	Pirellula	Pirellula staleyi
soil	0.081407	10113	1097667	Bacteria	Actinobacteria	Thermoleophilia	Solirubrobacterales	Patulibacteraceae	Patulibacter	Patulibacter medicamentivorans
tomato	0.070382	10106	80816	Bacteria	Proteobacteria	Deltaproteobacteria	Myxococcales	Kofleriaceae	Haliangium	Haliangium ochraceum
soil	0.074255	10095	1097667	Bacteria	Actinobacteria	Thermoleophilia	Solirubrobacterales	Patulibacteraceae	Patulibacter	Patulibacter medicamentivorans
tomato	0.059938	10093	1691979	Bacteria	Bacteroidetes	Chitinophagia	Chitinophagales	Chitinophagaceae	NA	Chitinophagaceae bacterium PMP191F
tomato	0.068334	10086	433660	Bacteria	Actinobacteria	Actinobacteria	Propionibacteriales	Nocardioidaceae	Nocardioides	Nocardioides halotolerans
ruderals	0.060177	10083	354356	Bacteria	Bacteroidetes	Chitinophagia	Chitinophagales	Chitinophagaceae	Niastella	Niastella koreensis
tomato	0.070194	10079	1349421	Bacteria	Bacteroidetes	Chitinophagia	Chitinophagales	Chitinophagaceae	Flavihumibacter	Flavihumibacter solisilvae
soil	0.081093	10074	114	Bacteria	Planctomycetes	Planctomycetia	Planctomycetales	Gemmataceae	Gemmata	Gemmata obscuriglobus
soil	0.068938	10070	94132	Bacteria	Proteobacteria	Betaproteobacteria	Burkholderiales	Comamonadaceae	Ramlibacter	Ramlibacter tataouinensis
tomato	0.07303	10065	1736430	Bacteria	Proteobacteria	Betaproteobacteria	Burkholderiales	Comamonadaceae	Pelomonas	Pelomonas sp. Root1217
ruderals	0.060792	10063	354355	Bacteria	Bacteroidetes	Chitinophagia	Chitinophagales	Chitinophagaceae	Niastella	Niastella yeongjuensis
soil	0.073098	10060	1076	Bacteria	Proteobacteria	Alphaproteobacteria	Rhizobiales	Bradyrhizobiaceae	Rhodopseudomonas	Rhodopseudomonas palustris
ruderals	0.063853	10046	83615	Bacteria	Proteobacteria	Gammaproteobacteria	Xanthomonadales	Xanthomonadaceae	Luteimonas	Luteimonas mephitis
ruderals	0.084161	10030	35752	Bacteria	Actinobacteria	Actinobacteria	Micromonosporales	Micromonosporaceae	Actinoplanes	Actinoplanes philippinensis
tomato	0.067935	10027	1895795	Bacteria	Proteobacteria	Deltaproteobacteria	Myxococcales	NA	NA	Myxococcales bacterium 68-20
ruderals	0.059778	10016	1797663	Bacteria	Chloroflexi	NA	NA	NA	NA	Chloroflexi bacterium RBG_16_72_14
ruderals	0.084018	10013	1660160	Bacteria	Acidobacteria	NA	NA	NA	NA	Acidobacteria bacterium SCN 69-37
ruderals	0.059712	10005	1961110	Bacteria	Bacteroidetes	Sphingobacteriia	Sphingobacteriales	NA	NA	Sphingobacteriales bacterium UTBCD1
soil	0.080497	10000	1380391	Bacteria	Proteobacteria	Alphaproteobacteria	Rhodospirillales	Rhodospirillaceae	Dongia	Dongia sp. URHE0060
ruderals	0.0839	9999	1895833	Bacteria	Actinobacteria	Thermoleophilia	Solirubrobacterales	NA	NA	Solirubrobacterales bacterium 70-9
tomato	0.067073	9988	137265	Bacteria	Actinobacteria	Actinobacteria	Micromonosporales	Micromonosporaceae	Asanoa	Asanoa ishikariensis
tomato	0.06954	9985	1961100	Bacteria	Chloroflexi	Anaerolineae	NA	NA	NA	Anaerolineae bacterium UTCFX1
ruderals	0.060321	9985	1267533	Bacteria	Acidobacteria	Acidobacteriia	Acidobacteriales	Acidobacteriaceae	NA	Acidobacteriaceae bacterium KBS 83
tomato	0.059238	9975	1173027	Bacteria	Cyanobacteria	NA	Oscillatoriales	Microcoleaceae	Microcoleus	Microcoleus sp. PCC 7113
soil	0.073313	9967	1895795	Bacteria	Proteobacteria	Deltaproteobacteria	Myxococcales	NA	NA	Myxococcales bacterium 68-20
tomato	0.059166	9963	1379270	Bacteria	Gemmatimonadetes	Gemmatimonadetes	Gemmatimonadales	Gemmatimonadaceae	Gemmatimonas	Gemmatimonas phototrophica
ruderals	0.060164	9959	284016	Bacteria	Proteobacteria	Alphaproteobacteria	Caulobacterales	Caulobacteraceae	Phenylobacterium	Phenylobacterium zucineum
ruderals	0.083439	9944	1391654	Bacteria	Proteobacteria	Deltaproteobacteria	Myxococcales	Labilitrichaceae	Labilithrix	Labilithrix luteola
tomato	0.069184	9934	1660129	Bacteria	Proteobacteria	Alphaproteobacteria	Caulobacterales	Caulobacteraceae	Phenylobacterium	Phenylobacterium sp. SCN 70-31
soil	0.067011	9923	1799662	Bacteria	Proteobacteria	Betaproteobacteria	NA	NA	NA	Betaproteobacteria bacterium SCGC AG-212-J23
tomato	0.071862	9904	1797561	Bacteria	Proteobacteria	Betaproteobacteria	Burkholderiales	NA	NA	Burkholderiales bacterium RIFCSPHIGHO2_12_FULL_69_20
ruderals	0.083019	9894	125	Bacteria	Planctomycetes	Planctomycetia	Planctomycetales	Planctomycetaceae	Pirellula	Pirellula staleyi
tomato	0.068899	9893	394096	Bacteria	Proteobacteria	Deltaproteobacteria	Myxococcales	Archangiaceae	Hyalangium	Hyalangium minutum
soil	0.068221	8475	1034015	Archaea	Thaumarchaeota	Nitrososphaeria	Nitrososphaerales	Nitrososphaeraceae	Nitrososphaera	Nitrososphaera viennensis
tomato	0.071637	9873	1173027	Bacteria	Cyanobacteria	NA	Oscillatoriales	Microcoleaceae	Microcoleus	Microcoleus sp. PCC 7113
ruderals	0.062703	9865	1895832	Bacteria	Actinobacteria	Thermoleophilia	Solirubrobacterales	NA	NA	Solirubrobacterales bacterium 67-14
ruderals	0.058829	9857	722472	Bacteria	Proteobacteria	Alphaproteobacteria	Rhizobiales	Bradyrhizobiaceae	Bradyrhizobium	Bradyrhizobium lablabi
soil	0.072497	9856	688867	Bacteria	Bacteroidetes	Cytophagia	Cytophagales	Cytophagaceae	Ohtaekwangia	Ohtaekwangia koreensis
tomato	0.058525	9855	1235591	Bacteria	Proteobacteria	Alphaproteobacteria	Rhizobiales	NA	Pseudorhodoplanes	Pseudorhodoplanes sinuspersici
ruderals	0.059154	9851	1298863	Bacteria	Actinobacteria	Actinobacteria	Propionibacteriales	Nocardioidaceae	Marmoricola	Marmoricola sp. URHB0036
ruderals	0.082633	9848	35754	Bacteria	Actinobacteria	Actinobacteria	Micromonosporales	Micromonosporaceae	Dactylosporangium	Dactylosporangium aurantiacum
ruderals	0.058691	9834	1803481	Bacteria	Actinobacteria	NA	NA	NA	NA	Actinobacteria bacterium 13_1_20CM_4_69_9
tomato	0.071347	9833	1895839	Bacteria	Bacteroidetes	Sphingobacteriia	Sphingobacteriales	NA	NA	Sphingobacteriales bacterium 46-32
ruderals	0.05901	9827	1550233	Bacteria	Actinobacteria	Actinobacteria	Geodermatophilales	Geodermatophilaceae	Blastococcus	Blastococcus sp. DSM 44205
ruderals	0.058944	9816	941907	Bacteria	Proteobacteria	Alphaproteobacteria	Sphingomonadales	Sphingomonadaceae	Sphingomonas	Sphingomonas indica
ruderals	0.058938	9815	1895795	Bacteria	Proteobacteria	Deltaproteobacteria	Myxococcales	NA	NA	Myxococcales bacterium 68-20
ruderals	0.062347	9809	1630693	Bacteria	Planctomycetes	Planctomycetia	Planctomycetales	Gemmataceae	Gemmata	Gemmata sp. SH-PL17
soil	0.073455	9785	1961100	Bacteria	Chloroflexi	Anaerolineae	NA	NA	NA	Anaerolineae bacterium UTCFX1
soil	0.07344	9783	68170	Bacteria	Actinobacteria	Actinobacteria	Pseudonocardiales	Pseudonocardiaceae	Lechevalieria	Lechevalieria aerocolonigenes
soil	0.066967	9782	29448	Bacteria	Proteobacteria	Alphaproteobacteria	Rhizobiales	Bradyrhizobiaceae	Bradyrhizobium	Bradyrhizobium elkanii
soil	0.071916	9777	38312	Bacteria	Actinobacteria	Actinobacteria	Corynebacteriales	Nocardiaceae	Rhodococcus	Rhodococcus rhodnii
ruderals	0.066993	10540	1353260	Archaea	Thaumarchaeota	Nitrososphaeria	Nitrososphaerales	Nitrososphaeraceae	Candidatus Nitrosocosmicus	Candidatus Nitrocosmicus oleophilus
ruderals	0.082021	9775	1970199	Bacteria	Proteobacteria	Deltaproteobacteria	Myxococcales	NA	NA	Sorangiineae bacterium NIC37A_2
ruderals	0.082004	9773	1797182	Bacteria	Acidobacteria	NA	NA	NA	NA	Acidobacteria bacterium RIFCSPLOWO2_02_FULL_65_29
soil	0.07863	9768	1895795	Bacteria	Proteobacteria	Deltaproteobacteria	Myxococcales	NA	NA	Myxococcales bacterium 68-20
ruderals	0.062048	9762	722472	Bacteria	Proteobacteria	Alphaproteobacteria	Rhizobiales	Bradyrhizobiaceae	Bradyrhizobium	Bradyrhizobium lablabi
tomato	0.06784	9741	927083	Bacteria	Proteobacteria	Deltaproteobacteria	Myxococcales	Sandaracinaceae	Sandaracinus	Sandaracinus amylolyticus
ruderals	0.058136	9741	946333	Bacteria	Proteobacteria	Betaproteobacteria	Burkholderiales	NA	Rhizobacter	Rhizobacter gummiphilus
soil	0.066502	9041	1460663	Eukaryota	Ascomycota	Dothideomycetes	Pleosporales	Didymosphaeriaceae	Paraphaeosphaeria	Paraphaeosphaeria sporulosa
tomato	0.0578	9733	114	Bacteria	Planctomycetes	Planctomycetia	Planctomycetales	Gemmataceae	Gemmata	Gemmata obscuriglobus
tomato	0.065334	9729	1736584	Bacteria	Proteobacteria	Alphaproteobacteria	Sphingomonadales	Erythrobacteraceae	Altererythrobacter	Altererythrobacter sp. Root672
ruderals	0.058416	9728	80816	Bacteria	Proteobacteria	Deltaproteobacteria	Myxococcales	Kofleriaceae	Haliangium	Haliangium ochraceum
soil	0.071497	9720	125	Bacteria	Planctomycetes	Planctomycetia	Planctomycetales	Planctomycetaceae	Pirellula	Pirellula staleyi
tomato	0.065166	9704	1797182	Bacteria	Acidobacteria	NA	NA	NA	NA	Acidobacteria bacterium RIFCSPLOWO2_02_FULL_65_29
soil	0.065484	9697	1076	Bacteria	Proteobacteria	Alphaproteobacteria	Rhizobiales	Bradyrhizobiaceae	Rhodopseudomonas	Rhodopseudomonas palustris
tomato	0.067457	9686	364039	Bacteria	Proteobacteria	Betaproteobacteria	Burkholderiales	Alcaligenaceae	Azohydromonas	Azohydromonas australica
soil	0.072704	9685	927083	Bacteria	Proteobacteria	Deltaproteobacteria	Myxococcales	Sandaracinaceae	Sandaracinus	Sandaracinus amylolyticus
tomato	0.057515	9685	1380353	Bacteria	Actinobacteria	Actinobacteria	Geodermatophilales	Geodermatophilaceae	NA	Geodermatophilaceae bacterium URHB0062
soil	0.071202	9680	673521	Bacteria	Actinobacteria	Actinobacteria	Geodermatophilales	Geodermatophilaceae	Blastococcus	Blastococcus endophyticus
soil	0.071202	9680	1225564	Bacteria	Proteobacteria	Alphaproteobacteria	Rhizobiales	Methylobacteriaceae	Microvirga	Microvirga vignae
tomato	0.064978	9676	186479	Bacteria	Chloroflexi	NA	NA	NA	Kouleothrix	Kouleothrix aurantiaca
ruderals	0.058092	9674	1869	Bacteria	Actinobacteria	Actinobacteria	Micromonosporales	Micromonosporaceae	Actinoplanes	Actinoplanes utahensis
soil	0.071158	9674	68170	Bacteria	Actinobacteria	Actinobacteria	Pseudonocardiales	Pseudonocardiaceae	Lechevalieria	Lechevalieria aerocolonigenes
tomato	0.065868	9722	10239	Viruses
soil	0.065262	9664	1985174	Bacteria	Bacteroidetes	Chitinophagia	Chitinophagales	Chitinophagaceae	NA	Chitinophagaceae bacterium IBVUCB2
soil	0.072532	9662	1803462	Bacteria	Acidobacteria	NA	NA	NA	NA	Acidobacteria bacterium 13_2_20CM_2_66_4
soil	0.070089	9646	107709	Bacteria	Verrucomicrobia	Opitutae	Opitutales	Opitutaceae	Opitutus	Opitutus terrae
soil	0.077623	9643	864069	Bacteria	Proteobacteria	Alphaproteobacteria	Rhizobiales	Methylobacteriaceae	Microvirga	Microvirga lotononidis
ruderals	0.061164	9623	354355	Bacteria	Bacteroidetes	Chitinophagia	Chitinophagales	Chitinophagaceae	Niastella	Niastella yeongjuensis
ruderals	0.057737	9615	138336	Bacteria	Actinobacteria	Actinobacteria	Geodermatophilales	Geodermatophilaceae	Blastococcus	Blastococcus saxobsidens
tomato	0.065136	9614	94132	Bacteria	Proteobacteria	Betaproteobacteria	Burkholderiales	Comamonadaceae	Ramlibacter	Ramlibacter tataouinensis
soil	0.069828	9610	1235591	Bacteria	Proteobacteria	Alphaproteobacteria	Rhizobiales	NA	Pseudorhodoplanes	Pseudorhodoplanes sinuspersici
soil	0.064883	9608	1298863	Bacteria	Actinobacteria	Actinobacteria	Propionibacteriales	Nocardioidaceae	Marmoricola	Marmoricola sp. URHB0036
tomato	0.05704	9605	360055	Bacteria	Planctomycetes	Planctomycetia	Planctomycetales	Gemmataceae	Zavarzinella	Zavarzinella formosa
soil	0.065748	9604	1267535	Bacteria	Acidobacteria	Acidobacteriia	Acidobacteriales	Acidobacteriaceae	NA	Acidobacteriaceae bacterium KBS 96
ruderals	0.058007	9602	1803462	Bacteria	Acidobacteria	NA	NA	NA	NA	Acidobacteria bacterium 13_2_20CM_2_66_4
soil	0.077253	9597	1797894	Bacteria	Proteobacteria	Deltaproteobacteria	NA	NA	NA	Deltaproteobacteria bacterium RIFCSPLOWO2_12_FULL_60_19
tomato	0.064994	9593	1797501	Bacteria	Proteobacteria	Betaproteobacteria	NA	NA	NA	Betaproteobacteria bacterium RIFCSPLOWO2_12_FULL_65_14
ruderals	0.060961	9591	1895809	Bacteria	Actinobacteria	Actinobacteria	Pseudonocardiales	Pseudonocardiaceae	Pseudonocardia	Pseudonocardia sp. 73-21
soil	0.070533	9589	134676	Bacteria	Actinobacteria	Actinobacteria	Micromonosporales	Micromonosporaceae	Actinoplanes	Actinoplanes sp. SE50/110
soil	0.069508	9566	1380390	Bacteria	Actinobacteria	Thermoleophilia	Solirubrobacterales	NA	NA	Solirubrobacterales bacterium URHD0059
soil	0.070305	9558	1235591	Bacteria	Proteobacteria	Alphaproteobacteria	Rhizobiales	NA	Pseudorhodoplanes	Pseudorhodoplanes sinuspersici
ruderals	0.057044	9558	649831	Bacteria	Actinobacteria	Actinobacteria	Micromonosporales	Micromonosporaceae	Actinoplanes	Actinoplanes sp. N902-109
tomato	0.064723	9553	29539	Bacteria	Actinobacteria	Thermoleophilia	Thermoleophilales	Thermoleophilaceae	Thermoleophilum	Thermoleophilum album
ruderals	0.056949	9542	1391654	Bacteria	Proteobacteria	Deltaproteobacteria	Myxococcales	Labilitrichaceae	Labilithrix	Labilithrix luteola
soil	0.064417	9539	114	Bacteria	Planctomycetes	Planctomycetia	Planctomycetales	Gemmataceae	Gemmata	Gemmata obscuriglobus
soil	0.070128	9534	703222	Bacteria	Actinobacteria	Actinobacteria	Pseudonocardiales	Pseudonocardiaceae	Kibdelosporangium	Kibdelosporangium sp. MJ126-NF4
soil	0.071548	9531	1235591	Bacteria	Proteobacteria	Alphaproteobacteria	Rhizobiales	NA	Pseudorhodoplanes	Pseudorhodoplanes sinuspersici
tomato	0.056577	9527	173480	Bacteria	Gemmatimonadetes	Gemmatimonadetes	Gemmatimonadales	Gemmatimonadaceae	Gemmatimonas	Gemmatimonas aurantiaca
tomato	0.064533	9525	1803462	Bacteria	Acidobacteria	NA	NA	NA	NA	Acidobacteria bacterium 13_2_20CM_2_66_4
soil	0.064316	9524	658062	Bacteria	Acidobacteria	Acidobacteriia	Acidobacteriales	Acidobacteriaceae	Candidatus Koribacter	Candidatus Koribacter versatilis
ruderals	0.060503	9519	1267535	Bacteria	Acidobacteria	Acidobacteriia	Acidobacteriales	Acidobacteriaceae	NA	Acidobacteriaceae bacterium KBS 96
tomato	0.064452	9513	1267535	Bacteria	Acidobacteria	Acidobacteriia	Acidobacteriales	Acidobacteriaceae	NA	Acidobacteriaceae bacterium KBS 96
soil	0.076537	9508	1492898	Bacteria	Bacteroidetes	Chitinophagia	Chitinophagales	Chitinophagaceae	Flavisolibacter	Flavisolibacter sp. LCS9
soil	0.064181	9504	1895814	Bacteria	Proteobacteria	Alphaproteobacteria	Rhizobiales	NA	NA	Rhizobiales bacterium 64-17
ruderals	0.079596	9486	360055	Bacteria	Planctomycetes	Planctomycetia	Planctomycetales	Gemmataceae	Zavarzinella	Zavarzinella formosa
tomato	0.063675	9482	114	Bacteria	Planctomycetes	Planctomycetia	Planctomycetales	Gemmataceae	Gemmata	Gemmata obscuriglobus
ruderals	0.057186	9466	137265	Bacteria	Actinobacteria	Actinobacteria	Micromonosporales	Micromonosporaceae	Asanoa	Asanoa ishikariensis
ruderals	0.057131	9457	1895712	Bacteria	Proteobacteria	Alphaproteobacteria	NA	NA	NA	Alphaproteobacteria bacterium 65-7
tomato	0.068597	9454	1803481	Bacteria	Actinobacteria	NA	NA	NA	NA	Actinobacteria bacterium 13_1_20CM_4_69_9
ruderals	0.056423	9454	1076	Bacteria	Proteobacteria	Alphaproteobacteria	Rhizobiales	Bradyrhizobiaceae	Rhodopseudomonas	Rhodopseudomonas palustris
tomato	0.068568	9450	550983	Bacteria	Bacteroidetes	Chitinophagia	Chitinophagales	Chitinophagaceae	Niastella	Niastella populi
tomato	0.068561	9449	45677	Bacteria	Proteobacteria	Betaproteobacteria	Burkholderiales	Alcaligenaceae	Azohydromonas	Azohydromonas lata
tomato	0.05609	9445	1660129	Bacteria	Proteobacteria	Alphaproteobacteria	Caulobacterales	Caulobacteraceae	Phenylobacterium	Phenylobacterium sp. SCN 70-31
tomato	0.064054	10786	38833	Eukaryota	Chlorophyta	Mamiellophyceae	Mamiellales	Mamiellaceae	Micromonas	Micromonas pusilla
ruderals	0.06002	9443	34073	Bacteria	Proteobacteria	Betaproteobacteria	Burkholderiales	Comamonadaceae	Variovorax	Variovorax paradoxus
tomato	0.063964	9441	1630693	Bacteria	Planctomycetes	Planctomycetia	Planctomycetales	Gemmataceae	Gemmata	Gemmata sp. SH-PL17
tomato	0.068495	9440	35754	Bacteria	Actinobacteria	Actinobacteria	Micromonosporales	Micromonosporaceae	Dactylosporangium	Dactylosporangium aurantiacum
ruderals	0.059995	9439	1970199	Bacteria	Proteobacteria	Deltaproteobacteria	Myxococcales	NA	NA	Sorangiineae bacterium NIC37A_2
ruderals	0.057017	9438	573321	Bacteria	Bacteroidetes	Chitinophagia	Chitinophagales	Chitinophagaceae	Chitinophaga	Chitinophaga rupis
soil	0.069356	9429	888845	Bacteria	Proteobacteria	Deltaproteobacteria	Myxococcales	NA	Minicystis	Minicystis rosea
soil	0.068505	9428	1799658	Bacteria	Planctomycetes	Planctomycetia	Planctomycetales	Planctomycetaceae	NA	Planctomycetaceae bacterium SCGC AG-212-F19
tomato	0.063218	9414	1797203	Bacteria	Actinobacteria	NA	NA	NA	NA	Actinobacteria bacterium RBG_16_68_12
tomato	0.063754	9410	1465490	Bacteria	Bacteroidetes	Chitinophagia	Chitinophagales	Chitinophagaceae	Parafilimonas	Parafilimonas terrae
ruderals	0.056811	9404	196914	Bacteria	Actinobacteria	Actinobacteria	Micromonosporales	Micromonosporaceae	Actinoplanes	Actinoplanes friuliensis
tomato	0.065486	9403	1895753	Bacteria	Proteobacteria	Alphaproteobacteria	Rhizobiales	Hyphomicrobiaceae	Devosia	Devosia sp. 66-22
tomato	0.068125	9389	56438	Bacteria	Actinobacteria	Actinobacteria	Micromonosporales	Micromonosporaceae	Couchioplanes	Couchioplanes caeruleus
soil	0.068966	9376	1032527	Bacteria	Verrucomicrobia	Verrucomicrobiae	Verrucomicrobiales	Verrucomicrobia subdivision 3	Pedosphaera	Pedosphaera parvula
ruderals	0.055898	9366	433660	Bacteria	Actinobacteria	Actinobacteria	Propionibacteriales	Nocardioidaceae	Nocardioides	Nocardioides halotolerans
soil	0.063222	9362	1895825	Bacteria	Proteobacteria	Alphaproteobacteria	Rhodospirillales	NA	NA	Rhodospirillales bacterium 69-11
ruderals	0.056212	9361	1396141	Bacteria	Verrucomicrobia	Verrucomicrobiae	Verrucomicrobiales	Verrucomicrobiaceae	Haloferula	Haloferula sp. BvORR071
soil	0.068004	9359	1813736	Bacteria	Acidobacteria	NA	NA	NA	NA	Acidobacteria bacterium DSM 100886
soil	0.063033	9334	722472	Bacteria	Proteobacteria	Alphaproteobacteria	Rhizobiales	Bradyrhizobiaceae	Bradyrhizobium	Bradyrhizobium lablabi
ruderals	0.078237	9324	927083	Bacteria	Proteobacteria	Deltaproteobacteria	Myxococcales	Sandaracinaceae	Sandaracinus	Sandaracinus amylolyticus
ruderals	0.056304	9320	1235591	Bacteria	Proteobacteria	Alphaproteobacteria	Rhizobiales	NA	Pseudorhodoplanes	Pseudorhodoplanes sinuspersici
tomato	0.055324	9316	125	Bacteria	Planctomycetes	Planctomycetia	Planctomycetales	Planctomycetaceae	Pirellula	Pirellula staleyi
ruderals	0.059207	9315	1768806	Bacteria	Proteobacteria	Alphaproteobacteria	Rhodospirillales	Rhodospirillaceae	NA	Rhodospirillaceae bacterium CCH5-H10
ruderals	0.055924	9313	1798227	Bacteria	Actinobacteria	Actinobacteria	Geodermatophilales	Geodermatophilaceae	Blastococcus	Blastococcus sp. DSM 46786
soil	0.074951	9311	49319	Bacteria	Actinobacteria	Rubrobacteria	Rubrobacterales	Rubrobacteraceae	Rubrobacter	Rubrobacter xylanophilus
soil	0.062871	9310	360054	Bacteria	Acidobacteria	Solibacteres	Solibacterales	Bryobacteraceae	Bryobacter	Bryobacter aggregatus
ruderals	0.055552	9308	1660163	Bacteria	Gemmatimonadetes	NA	NA	NA	NA	Gemmatimonadetes bacterium SCN 70-22
soil	0.074927	9308	1380353	Bacteria	Actinobacteria	Actinobacteria	Geodermatophilales	Geodermatophilaceae	NA	Geodermatophilaceae bacterium URHB0062
soil	0.062851	9307	1267533	Bacteria	Acidobacteria	Acidobacteriia	Acidobacteriales	Acidobacteriaceae	NA	Acidobacteriaceae bacterium KBS 83
soil	0.063674	9301	1797663	Bacteria	Chloroflexi	NA	NA	NA	NA	Chloroflexi bacterium RBG_16_72_14
ruderals	0.059092	9297	40682	Bacteria	Proteobacteria	Alphaproteobacteria	Sphingomonadales	Sphingomonadaceae	Sphingomonas	Sphingomonas mali
ruderals	0.055792	9291	1429916	Bacteria	Proteobacteria	Alphaproteobacteria	Rhizobiales	Bradyrhizobiaceae	Afipia	Afipia sp. P52-10
soil	0.063564	9285	1799658	Bacteria	Planctomycetes	Planctomycetia	Planctomycetales	Planctomycetaceae	NA	Planctomycetaceae bacterium SCGC AG-212-F19
tomato	0.062345	9284	360055	Bacteria	Planctomycetes	Planctomycetia	Planctomycetales	Gemmataceae	Zavarzinella	Zavarzinella formosa
ruderals	0.077884	9282	1797501	Bacteria	Proteobacteria	Betaproteobacteria	NA	NA	NA	Betaproteobacteria bacterium RIFCSPLOWO2_12_FULL_65_14
ruderals	0.055732	9281	1137993	Bacteria	Actinobacteria	Actinobacteria	Geodermatophilales	Geodermatophilaceae	Geodermatophilus	Geodermatophilus africanus
tomato	0.064616	9278	56438	Bacteria	Actinobacteria	Actinobacteria	Micromonosporales	Micromonosporaceae	Couchioplanes	Couchioplanes caeruleus
soil	0.068238	9277	938405	Bacteria	Proteobacteria	Alphaproteobacteria	Rhodospirillales	Acetobacteraceae	Belnapia	Belnapia rosea
soil	0.069589	9270	1437360	Bacteria	Proteobacteria	Alphaproteobacteria	Rhizobiales	Bradyrhizobiaceae	Bradyrhizobium	Bradyrhizobium erythrophlei
soil	0.062574	9266	171674	Bacteria	Proteobacteria	Alphaproteobacteria	Rhodospirillales	Rhodospirillaceae	Inquilinus	Inquilinus limosus
soil	0.068135	9263	1296565	Bacteria	Actinobacteria	Actinobacteria	Geodermatophilales	Geodermatophilaceae	Geodermatophilus	Geodermatophilus amargosae
ruderals	0.055594	9258	284016	Bacteria	Proteobacteria	Alphaproteobacteria	Caulobacterales	Caulobacteraceae	Phenylobacterium	Phenylobacterium zucineum
soil	0.063325	9250	394096	Bacteria	Proteobacteria	Deltaproteobacteria	Myxococcales	Archangiaceae	Hyalangium	Hyalangium minutum
soil	0.068025	9248	1380389	Bacteria	Proteobacteria	Alphaproteobacteria	Sphingomonadales	Sphingomonadaceae	Sphingomonas	Sphingomonas sp. URHD0057
ruderals	0.05873	9240	1619897	Bacteria	Bacteroidetes	NA	NA	NA	NA	Bacteroidetes bacterium OLB12
ruderals	0.055443	9233	1855728	Bacteria	Proteobacteria	Betaproteobacteria	Burkholderiales	Comamonadaceae	Variovorax	Variovorax sp. KK3
tomato	0.061996	9232	1895795	Bacteria	Proteobacteria	Deltaproteobacteria	Myxococcales	NA	NA	Myxococcales bacterium 68-20
ruderals	0.06235	10447	588596	Eukaryota	Mucoromycota	Glomeromycetes	Glomerales	Glomeraceae	Rhizophagus	Rhizophagus irregularis
ruderals	0.058616	9222	1518501	Bacteria	Proteobacteria	Alphaproteobacteria	Rhizobiales	Bradyrhizobiaceae	Bradyrhizobium	Bradyrhizobium valentinum
ruderals	0.055033	9221	1805166	Bacteria	Proteobacteria	Gammaproteobacteria	NA	NA	NA	Gammaproteobacteria bacterium 13_2_20CM_66_19
tomato	0.066892	9219	927083	Bacteria	Proteobacteria	Deltaproteobacteria	Myxococcales	Sandaracinaceae	Sandaracinus	Sandaracinus amylolyticus
ruderals	0.058597	9219	398037	Bacteria	Bacteroidetes	Chitinophagia	Chitinophagales	Chitinophagaceae	Segetibacter	Segetibacter koreensis
soil	0.063051	9210	354355	Bacteria	Bacteroidetes	Chitinophagia	Chitinophagales	Chitinophagaceae	Niastella	Niastella yeongjuensis
ruderals	0.058527	9208	40683	Bacteria	Proteobacteria	Alphaproteobacteria	Sphingomonadales	Sphingomonadaceae	Sphingomonas	Sphingomonas pruni
tomato	0.061808	9204	1302690	Bacteria	Bacteroidetes	Chitinophagia	Chitinophagales	Chitinophagaceae	Cnuella	Cnuella takakiae
soil	0.067635	9195	113562	Bacteria	Actinobacteria	Actinobacteria	Micromonosporales	Micromonosporaceae	Actinoplanes	Actinoplanes derwentensis
soil	0.074001	9193	1799658	Bacteria	Planctomycetes	Planctomycetia	Planctomycetales	Planctomycetaceae	NA	Planctomycetaceae bacterium SCGC AG-212-F19
tomato	0.06394	9181	51	Bacteria	Proteobacteria	Deltaproteobacteria	Myxococcales	Polyangiaceae	Chondromyces	Chondromyces apiculatus
ruderals	0.05831	9174	1660160	Bacteria	Acidobacteria	NA	NA	NA	NA	Acidobacteria bacterium SCN 69-37
ruderals	0.058253	9165	1429916	Bacteria	Proteobacteria	Alphaproteobacteria	Rhizobiales	Bradyrhizobiaceae	Afipia	Afipia sp. P52-10
tomato	0.066493	9164	1866	Bacteria	Actinobacteria	Actinobacteria	Micromonosporales	Micromonosporaceae	Actinoplanes	Actinoplanes missouriensis
soil	0.067363	9158	550983	Bacteria	Bacteroidetes	Chitinophagia	Chitinophagales	Chitinophagaceae	Niastella	Niastella populi
ruderals	0.058209	9158	354356	Bacteria	Bacteroidetes	Chitinophagia	Chitinophagales	Chitinophagaceae	Niastella	Niastella koreensis
ruderals	0.054981	9156	1137991	Bacteria	Actinobacteria	Actinobacteria	Geodermatophilales	Geodermatophilaceae	Geodermatophilus	Geodermatophilus siccatus
ruderals	0.054627	9153	529705	Bacteria	Proteobacteria	Alphaproteobacteria	Sphingomonadales	Sphingomonadaceae	Sphingomonas	Sphingomonas changbaiensis
ruderals	0.054621	9152	354355	Bacteria	Bacteroidetes	Chitinophagia	Chitinophagales	Chitinophagaceae	Niastella	Niastella yeongjuensis
soil	0.073655	9150	1797663	Bacteria	Chloroflexi	NA	NA	NA	NA	Chloroflexi bacterium RBG_16_72_14
tomato	0.061271	9124	1632864	Bacteria	Planctomycetes	Planctomycetia	Planctomycetales	Planctomycetaceae	Planctomyces	Planctomyces sp. SH-PL14
tomato	0.066195	9123	35752	Bacteria	Actinobacteria	Actinobacteria	Micromonosporales	Micromonosporaceae	Actinoplanes	Actinoplanes philippinensis
ruderals	0.054669	9104	1736431	Bacteria	Actinobacteria	Actinobacteria	Propionibacteriales	Nocardioidaceae	Nocardioides	Nocardioides sp. Root122
ruderals	0.054633	9098	1703345	Bacteria	Bacteroidetes	Chitinophagia	Chitinophagales	Chitinophagaceae	Niastella	Niastella vici
soil	0.066914	9097	134849	Bacteria	Actinobacteria	Actinobacteria	Frankiales	Cryptosporangiaceae	Cryptosporangium	Cryptosporangium aurantiacum
tomato	0.053994	9092	1380390	Bacteria	Actinobacteria	Thermoleophilia	Solirubrobacterales	NA	NA	Solirubrobacterales bacterium URHD0059
tomato	0.061056	9092	113562	Bacteria	Actinobacteria	Actinobacteria	Micromonosporales	Micromonosporaceae	Actinoplanes	Actinoplanes derwentensis
tomato	0.065941	9088	1630693	Bacteria	Planctomycetes	Planctomycetia	Planctomycetales	Gemmataceae	Gemmata	Gemmata sp. SH-PL17
tomato	0.061552	9085	462367	Bacteria	Bacteroidetes	Chitinophagia	Chitinophagales	Chitinophagaceae	Flavisolibacter	Flavisolibacter ginsengisoli
tomato	0.053928	9081	1895795	Bacteria	Proteobacteria	Deltaproteobacteria	Myxococcales	NA	NA	Myxococcales bacterium 68-20
tomato	0.053893	9075	1736365	Bacteria	Proteobacteria	Betaproteobacteria	Burkholderiales	Comamonadaceae	Ramlibacter	Ramlibacter sp. Leaf400
ruderals	0.05412	9068	80816	Bacteria	Proteobacteria	Deltaproteobacteria	Myxococcales	Kofleriaceae	Haliangium	Haliangium ochraceum
ruderals	0.076072	9066	114	Bacteria	Planctomycetes	Planctomycetia	Planctomycetales	Gemmataceae	Gemmata	Gemmata obscuriglobus
tomato	0.053756	9052	398037	Bacteria	Bacteroidetes	Chitinophagia	Chitinophagales	Chitinophagaceae	Segetibacter	Segetibacter koreensis
soil	0.072866	9052	1803496	Bacteria	Actinobacteria	NA	NA	NA	NA	Actinobacteria bacterium 13_2_20CM_68_14
soil	0.061081	9045	688867	Bacteria	Bacteroidetes	Cytophagia	Cytophagales	Cytophagaceae	Ohtaekwangia	Ohtaekwangia koreensis
soil	0.072745	9037	83449	Bacteria	Proteobacteria	Deltaproteobacteria	Myxococcales	Archangiaceae	Cystobacter	Cystobacter ferrugineus
tomato	0.060673	9035	1803447	Bacteria	Acidobacteria	NA	NA	NA	NA	Acidobacteria bacterium 13_1_40CM_3_55_6
tomato	0.05362	9029	1033741	Bacteria	Proteobacteria	Alphaproteobacteria	Rhizobiales	Methylobacteriaceae	Microvirga	Microvirga massiliensis
tomato	0.053614	9028	70799	Bacteria	Cyanobacteria	NA	Nostocales	Aphanizomenonaceae	Nodularia	Nodularia spumigena
soil	0.067742	9024	649831	Bacteria	Actinobacteria	Actinobacteria	Micromonosporales	Micromonosporaceae	Actinoplanes	Actinoplanes sp. N902-109
tomato	0.065288	8998	1380357	Bacteria	Proteobacteria	Alphaproteobacteria	Rhodospirillales	NA	NA	Rhodospirillales bacterium URHD0017
soil	0.066142	8992	80871	Bacteria	Actinobacteria	Actinobacteria	Frankiales	Cryptosporangiaceae	Cryptosporangium	Cryptosporangium arvum
soil	0.066083	8984	2074	Bacteria	Actinobacteria	Actinobacteria	Pseudonocardiales	Pseudonocardiaceae	Pseudonocardia	Pseudonocardia autotrophica
tomato	0.060604	8945	135946	Bacteria	Actinobacteria	Actinobacteria	Micromonosporales	Micromonosporaceae	Actinoplanes	Actinoplanes awajinensis
ruderals	0.054014	8941	1797193	Bacteria	Acidobacteria	NA	NA	NA	NA	Acidobacteria bacterium RIFCSPLOWO2_12_FULL_67_14b
tomato	0.064838	8936	1797663	Bacteria	Chloroflexi	NA	NA	NA	NA	Chloroflexi bacterium RBG_16_72_14
tomato	0.060502	8930	393310	Bacteria	Proteobacteria	Alphaproteobacteria	Rhodospirillales	Rhodospirillaceae	Skermanella	Skermanella aerolata
tomato	0.060093	10119	10239	Viruses
ruderals	0.074863	8922	413479	Bacteria	Proteobacteria	Gammaproteobacteria	Nevskiales	Sinobacteraceae	Solimonas	Solimonas soli
ruderals	0.053558	8919	135946	Bacteria	Actinobacteria	Actinobacteria	Micromonosporales	Micromonosporaceae	Actinoplanes	Actinoplanes awajinensis
ruderals	0.053857	8915	1799655	Bacteria	Proteobacteria	Alphaproteobacteria	Micropepsales	Micropepsaceae	Rhizomicrobium	Rhizomicrobium sp. SCGC AG-212-E05
soil	0.064574	8887	570835	Bacteria	Acidobacteria	Acidobacteriia	Acidobacteriales	Acidobacteriaceae	Edaphobacter	Edaphobacter aggregans
soil	0.06534	8883	947013	Bacteria	Bacteroidetes	Cytophagia	Cytophagales	NA	Chryseolinea	Chryseolinea serpens
ruderals	0.074452	8873	1617423	Bacteria	Acidobacteria	NA	NA	NA	NA	Acidobacteria bacterium OLB17
soil	0.071417	8872	1797208	Bacteria	Actinobacteria	NA	NA	NA	NA	Actinobacteria bacterium RBG_19FT_COMBO_70_19
soil	0.060716	8869	1518501	Bacteria	Proteobacteria	Alphaproteobacteria	Rhizobiales	Bradyrhizobiaceae	Bradyrhizobium	Bradyrhizobium valentinum
tomato	0.060089	8869	125	Bacteria	Planctomycetes	Planctomycetia	Planctomycetales	Planctomycetaceae	Pirellula	Pirellula staleyi
ruderals	0.07441	8868	1895838	Bacteria	Bacteroidetes	Sphingobacteriia	Sphingobacteriales	NA	NA	Sphingobacteriales bacterium 44-61
ruderals	0.052908	8865	1797662	Bacteria	Chloroflexi	NA	NA	NA	NA	Chloroflexi bacterium RBG_16_70_13
soil	0.060669	8862	1985174	Bacteria	Bacteroidetes	Chitinophagia	Chitinophagales	Chitinophagaceae	NA	Chitinophagaceae bacterium IBVUCB2
tomato	0.061705	8860	54	Bacteria	Proteobacteria	Deltaproteobacteria	Myxococcales	Nannocystaceae	Nannocystis	Nannocystis exedens
ruderals	0.053168	8854	51	Bacteria	Proteobacteria	Deltaproteobacteria	Myxococcales	Polyangiaceae	Chondromyces	Chondromyces apiculatus
ruderals	0.053156	8852	1522368	Bacteria	Actinobacteria	Actinobacteria	Geodermatophilales	Geodermatophilaceae	Modestobacter	Modestobacter caceresii
tomato	0.064229	8852	864702	Bacteria	Cyanobacteria	NA	Oscillatoriales	NA	NA	Oscillatoriales cyanobacterium JSC-12
ruderals	0.05347	8851	134849	Bacteria	Actinobacteria	Actinobacteria	Frankiales	Cryptosporangiaceae	Cryptosporangium	Cryptosporangium aurantiacum
soil	0.066368	8841	1797203	Bacteria	Actinobacteria	NA	NA	NA	NA	Actinobacteria bacterium RBG_16_68_12
tomato	0.052485	8838	1798290	Bacteria	Proteobacteria	Gammaproteobacteria	NA	NA	NA	Gammaproteobacteria bacterium RIFCSPHIGHO2_12_FULL_63_22
ruderals	0.074083	8829	1904640	Bacteria	Proteobacteria	Betaproteobacteria	NA	NA	NA	Betaproteobacteria bacterium GR16-43
ruderals	0.052969	8821	1895809	Bacteria	Actinobacteria	Actinobacteria	Pseudonocardiales	Pseudonocardiaceae	Pseudonocardia	Pseudonocardia sp. 73-21
soil	0.064862	8818	1437360	Bacteria	Proteobacteria	Alphaproteobacteria	Rhizobiales	Bradyrhizobiaceae	Bradyrhizobium	Bradyrhizobium erythrophlei
ruderals	0.056016	8813	51	Bacteria	Proteobacteria	Deltaproteobacteria	Myxococcales	Polyangiaceae	Chondromyces	Chondromyces apiculatus
tomato	0.052307	8808	1866	Bacteria	Actinobacteria	Actinobacteria	Micromonosporales	Micromonosporaceae	Actinoplanes	Actinoplanes missouriensis
ruderals	0.058998	9825	588596	Eukaryota	Mucoromycota	Glomeromycetes	Glomerales	Glomeraceae	Rhizophagus	Rhizophagus irregularis
tomato	0.063902	8807	360054	Bacteria	Acidobacteria	Solibacteres	Solibacterales	Bryobacteraceae	Bryobacter	Bryobacter aggregatus
ruderals	0.053205	8807	1895809	Bacteria	Actinobacteria	Actinobacteria	Pseudonocardiales	Pseudonocardiaceae	Pseudonocardia	Pseudonocardia sp. 73-21
ruderals	0.052556	8806	1617416	Bacteria	Chloroflexi	NA	NA	NA	NA	Chloroflexi bacterium OLB15
tomato	0.061322	8805	391953	Bacteria	Proteobacteria	Betaproteobacteria	Burkholderiales	NA	Aquincola	Aquincola tertiaricarbonis
ruderals	0.052831	8798	1881103	Bacteria	Actinobacteria	Actinobacteria	Geodermatophilales	Geodermatophilaceae	Geodermatophilus	Geodermatophilus sp. DSM 45219
ruderals	0.052813	8795	2030	Bacteria	Actinobacteria	Actinobacteria	Pseudonocardiales	Pseudonocardiaceae	Kibdelosporangium	Kibdelosporangium aridum
ruderals	0.053096	8789	465721	Bacteria	Proteobacteria	Gammaproteobacteria	Nevskiales	Sinobacteraceae	Steroidobacter	Steroidobacter denitrificans
soil	0.063841	8786	1895833	Bacteria	Actinobacteria	Thermoleophilia	Solirubrobacterales	NA	NA	Solirubrobacterales bacterium 70-9
ruderals	0.052747	8784	394096	Bacteria	Proteobacteria	Deltaproteobacteria	Myxococcales	Archangiaceae	Hyalangium	Hyalangium minutum
tomato	0.063714	8781	1803507	Bacteria	Proteobacteria	Alphaproteobacteria	NA	NA	NA	Alphaproteobacteria bacterium 13_2_20CM_2_64_7
soil	0.059251	8774	1380394	Bacteria	Proteobacteria	Alphaproteobacteria	Rhodospirillales	NA	NA	Rhodospirillales bacterium URHD0088
soil	0.063688	8765	1040989	Bacteria	Proteobacteria	Alphaproteobacteria	Rhizobiales	Bradyrhizobiaceae	Bradyrhizobium	Bradyrhizobium sp. ARR65
soil	0.063644	8759	113395	Bacteria	Proteobacteria	Alphaproteobacteria	Rhizobiales	Bradyrhizobiaceae	Bradyrhizobium	Bradyrhizobium sp. Tv2a-2
tomato	0.059337	8758	1866	Bacteria	Actinobacteria	Actinobacteria	Micromonosporales	Micromonosporaceae	Actinoplanes	Actinoplanes missouriensis
tomato	0.05933	8757	927083	Bacteria	Proteobacteria	Deltaproteobacteria	Myxococcales	Sandaracinaceae	Sandaracinus	Sandaracinus amylolyticus
soil	0.070467	8754	1882682	Bacteria	Proteobacteria	Alphaproteobacteria	Rhizobiales	Methylobacteriaceae	Microvirga	Microvirga ossetica
ruderals	0.055488	8730	393310	Bacteria	Proteobacteria	Alphaproteobacteria	Rhodospirillales	Rhodospirillaceae	Skermanella	Skermanella aerolata
tomato	0.051838	8729	1895841	Bacteria	Bacteroidetes	Sphingobacteriia	Sphingobacteriales	NA	NA	Sphingobacteriales bacterium 50-39
ruderals	0.052417	8729	1805166	Bacteria	Proteobacteria	Gammaproteobacteria	NA	NA	NA	Gammaproteobacteria bacterium 13_2_20CM_66_19
tomato	0.05914	8729	1895814	Bacteria	Proteobacteria	Alphaproteobacteria	Rhizobiales	NA	NA	Rhizobiales bacterium 64-17
ruderals	0.052625	8711	1736466	Bacteria	Proteobacteria	Alphaproteobacteria	Rhizobiales	Xanthobacteraceae	Pseudolabrys	Pseudolabrys sp. Root1462
soil	0.058387	8646	1353260	Archaea	Thaumarchaeota	Nitrososphaeria	Nitrososphaerales	Nitrososphaeraceae	Candidatus Nitrosocosmicus	Candidatus Nitrocosmicus oleophilus
ruderals	0.055253	8693	218821	Bacteria	Actinobacteria	Actinobacteria	Pseudonocardiales	Pseudonocardiaceae	Amycolatopsis	Amycolatopsis pretoriensis
soil	0.058698	8692	2074	Bacteria	Actinobacteria	Actinobacteria	Pseudonocardiales	Pseudonocardiaceae	Pseudonocardia	Pseudonocardia autotrophica
ruderals	0.052474	8686	1803470	Bacteria	Acidobacteria	Acidobacteriia	Acidobacteriales	NA	NA	Acidobacteriales bacterium 13_2_20CM_55_8
tomato	0.058215	8669	191863	Bacteria	Verrucomicrobia	Spartobacteria	Chthoniobacterales	Chthoniobacteraceae	Chthoniobacter	Chthoniobacter flavus
soil	0.062961	8665	1895709	Bacteria	Proteobacteria	Alphaproteobacteria	NA	NA	NA	Alphaproteobacteria bacterium 64-11
ruderals	0.055075	8665	1895712	Bacteria	Proteobacteria	Alphaproteobacteria	NA	NA	NA	Alphaproteobacteria bacterium 65-7
tomato	0.058108	8653	76947	Bacteria	Proteobacteria	Alphaproteobacteria	Sphingomonadales	Sphingomonadaceae	Sphingobium	Sphingobium herbicidovorans
tomato	0.058101	8652	888845	Bacteria	Proteobacteria	Deltaproteobacteria	Myxococcales	NA	Minicystis	Minicystis rosea
tomato	0.058585	8647	354355	Bacteria	Bacteroidetes	Chitinophagia	Chitinophagales	Chitinophagaceae	Niastella	Niastella yeongjuensis
ruderals	0.052226	8645	1803481	Bacteria	Actinobacteria	NA	NA	NA	NA	Actinobacteria bacterium 13_1_20CM_4_69_9
soil	0.06353	8637	1660160	Bacteria	Acidobacteria	NA	NA	NA	NA	Acidobacteria bacterium SCN 69-37
soil	0.062729	8633	1895814	Bacteria	Proteobacteria	Alphaproteobacteria	Rhizobiales	NA	NA	Rhizobiales bacterium 64-17
soil	0.063472	8629	1799662	Bacteria	Proteobacteria	Betaproteobacteria	NA	NA	NA	Betaproteobacteria bacterium SCGC AG-212-J23
tomato	0.062611	8629	470	Bacteria	Proteobacteria	Gammaproteobacteria	Pseudomonadales	Moraxellaceae	Acinetobacter	Acinetobacter baumannii
soil	0.064755	8626	137265	Bacteria	Actinobacteria	Actinobacteria	Micromonosporales	Micromonosporaceae	Asanoa	Asanoa ishikariensis
tomato	0.057924	7983	10239	Viruses
soil	0.064664	8614	49319	Bacteria	Actinobacteria	Rubrobacteria	Rubrobacterales	Rubrobacteraceae	Rubrobacter	Rubrobacter xylanophilus
soil	0.058957	8612	550983	Bacteria	Bacteroidetes	Chitinophagia	Chitinophagales	Chitinophagaceae	Niastella	Niastella populi
tomato	0.057848	9741	4781	Eukaryota	NA	Oomycetes	Peronosporales	Peronosporaceae	Plasmopara	Plasmopara halstedii
soil	0.058882	8601	392409	Bacteria	Proteobacteria	Alphaproteobacteria	Sphingomonadales	Sphingomonadaceae	Sphingomonas	Sphingomonas jaspsi
ruderals	0.05193	8596	53368	Bacteria	Actinobacteria	Actinobacteria	Micromonosporales	Micromonosporaceae	Hamadaea	Hamadaea tsunoensis
soil	0.064522	8595	33876	Bacteria	Actinobacteria	Actinobacteria	Micromonosporales	Micromonosporaceae	Catenuloplanes	Catenuloplanes japonicus
tomato	0.057719	8595	1855291	Bacteria	Bacteroidetes	Cytophagia	Cytophagales	Cytophagaceae	Dyadobacter	Dyadobacter sp. SG02
ruderals	0.051906	8592	870903	Bacteria	Acidobacteria	Acidobacteriia	Acidobacteriales	Acidobacteriaceae	Terriglobus	Terriglobus saanensis
tomato	0.057698	8592	1380353	Bacteria	Actinobacteria	Actinobacteria	Geodermatophilales	Geodermatophilaceae	NA	Geodermatophilaceae bacterium URHB0062
tomato	0.057692	8591	1895833	Bacteria	Actinobacteria	Thermoleophilia	Solirubrobacterales	NA	NA	Solirubrobacterales bacterium 70-9
tomato	0.057678	8589	1759072	Bacteria	Proteobacteria	Alphaproteobacteria	Sphingomonadales	Sphingomonadaceae	Sphingopyxis	Sphingopyxis sp. H050
tomato	0.058104	8576	364039	Bacteria	Proteobacteria	Betaproteobacteria	Burkholderiales	Alcaligenaceae	Azohydromonas	Azohydromonas australica
tomato	0.050918	8574	1123067	Bacteria	Proteobacteria	Alphaproteobacteria	Rhodobacterales	Rhodobacteraceae	Rubellimicrobium	Rubellimicrobium mesophilum
soil	0.05869	8573	360056	Bacteria	Planctomycetes	Planctomycetia	Planctomycetales	Planctomycetaceae	Schlesneria	Schlesneria paludicola
ruderals	0.051136	8568	1885674	Bacteria	Proteobacteria	Gammaproteobacteria	Xanthomonadales	Xanthomonadaceae	Xanthomonas	Xanthomonas cannabis
ruderals	0.05113	8567	1895753	Bacteria	Proteobacteria	Alphaproteobacteria	Rhizobiales	Hyphomicrobiaceae	Devosia	Devosia sp. 66-22
ruderals	0.051118	8565	1518501	Bacteria	Proteobacteria	Alphaproteobacteria	Rhizobiales	Bradyrhizobiaceae	Bradyrhizobium	Bradyrhizobium valentinum
ruderals	0.051088	8560	1736215	Bacteria	Proteobacteria	Alphaproteobacteria	Sphingomonadales	Sphingomonadaceae	Sphingomonas	Sphingomonas sp. Leaf33
ruderals	0.054402	8559	225324	Bacteria	Proteobacteria	Alphaproteobacteria	Rhodospirillales	NA	Enhydrobacter	Enhydrobacter aerosaccus
tomato	0.057228	8522	74311	Bacteria	Proteobacteria	Alphaproteobacteria	Caulobacterales	Caulobacteraceae	Brevundimonas	Brevundimonas bacteroides
ruderals	0.071465	8517	1736431	Bacteria	Actinobacteria	Actinobacteria	Propionibacteriales	Nocardioidaceae	Nocardioides	Nocardioides sp. Root122
tomato	0.061755	8511	482564	Bacteria	Cyanobacteria	NA	Oscillatoriales	Oscillatoriaceae	Oscillatoria	Oscillatoria nigro-viridis
ruderals	0.054096	8511	1904640	Bacteria	Proteobacteria	Betaproteobacteria	NA	NA	NA	Betaproteobacteria bacterium GR16-43
ruderals	0.05106	8503	1691979	Bacteria	Bacteroidetes	Chitinophagia	Chitinophagales	Chitinophagaceae	NA	Chitinophagaceae bacterium PMP191F
tomato	0.050466	8498	80816	Bacteria	Proteobacteria	Deltaproteobacteria	Myxococcales	Kofleriaceae	Haliangium	Haliangium ochraceum
soil	0.063726	8489	1617415	Bacteria	Chloroflexi	NA	NA	NA	NA	Chloroflexi bacterium OLB14
tomato	0.057	8488	94132	Bacteria	Proteobacteria	Betaproteobacteria	Burkholderiales	Comamonadaceae	Ramlibacter	Ramlibacter tataouinensis
ruderals	0.071121	8476	543632	Bacteria	Actinobacteria	Actinobacteria	Micromonosporales	Micromonosporaceae	Actinoplanes	Actinoplanes subtropicus
ruderals	0.051181	8472	1736528	Bacteria	Proteobacteria	Betaproteobacteria	Burkholderiales	NA	Rhizobacter	Rhizobacter sp. Root404
tomato	0.057399	8472	1895753	Bacteria	Proteobacteria	Alphaproteobacteria	Rhizobiales	Hyphomicrobiaceae	Devosia	Devosia sp. 66-22
soil	0.063418	8448	1970199	Bacteria	Proteobacteria	Deltaproteobacteria	Myxococcales	NA	NA	Sorangiineae bacterium NIC37A_2
ruderals	0.050378	8441	1298863	Bacteria	Actinobacteria	Actinobacteria	Propionibacteriales	Nocardioidaceae	Marmoricola	Marmoricola sp. URHB0036
tomato	0.056678	8440	529823	Bacteria	Proteobacteria	Gammaproteobacteria	Cellvibrionales	Cellvibrionaceae	Cellvibrio	Cellvibrio sp. OA-2007
tomato	0.050003	8420	1411123	Bacteria	Proteobacteria	Alphaproteobacteria	Rhizobiales	NA	NA	Rhizobiales bacterium YIM 77505
ruderals	0.053512	8419	1895814	Bacteria	Proteobacteria	Alphaproteobacteria	Rhizobiales	NA	NA	Rhizobiales bacterium 64-17
soil	0.061875	8412	191863	Bacteria	Verrucomicrobia	Spartobacteria	Chthoniobacterales	Chthoniobacteraceae	Chthoniobacter	Chthoniobacter flavus
ruderals	0.050764	8403	398037	Bacteria	Bacteroidetes	Chitinophagia	Chitinophagales	Chitinophagaceae	Segetibacter	Segetibacter koreensis
ruderals	0.050387	8391	1904640	Bacteria	Proteobacteria	Betaproteobacteria	NA	NA	NA	Betaproteobacteria bacterium GR16-43
tomato	0.058431	8390	1686064	Bacteria	Proteobacteria	Betaproteobacteria	Burkholderiales	NA	Methylibium	Methylibium sp. NZG
tomato	0.056844	8390	941907	Bacteria	Proteobacteria	Alphaproteobacteria	Sphingomonadales	Sphingomonadaceae	Sphingomonas	Sphingomonas indica
tomato	0.05832	8374	1617415	Bacteria	Chloroflexi	NA	NA	NA	NA	Chloroflexi bacterium OLB14
ruderals	0.070248	8372	1298863	Bacteria	Actinobacteria	Actinobacteria	Propionibacteriales	Nocardioidaceae	Marmoricola	Marmoricola sp. URHB0036
soil	0.056469	8362	1882749	Bacteria	Verrucomicrobia	Opitutae	Opitutales	Opitutaceae	Opitutus	Opitutus sp. GAS368
tomato	0.056134	8359	674703	Bacteria	Proteobacteria	Alphaproteobacteria	Rhizobiales	Hyphomicrobiaceae	Rhodoplanes	Rhodoplanes sp. Z2-YC6860
tomato	0.049599	8352	1961110	Bacteria	Bacteroidetes	Sphingobacteriia	Sphingobacteriales	NA	NA	Sphingobacteriales bacterium UTBCD1
soil	0.062645	8345	186479	Bacteria	Chloroflexi	NA	NA	NA	Kouleothrix	Kouleothrix aurantiaca
soil	0.057088	8339	1895841	Bacteria	Bacteroidetes	Sphingobacteriia	Sphingobacteriales	NA	NA	Sphingobacteriales bacterium 50-39
ruderals	0.049763	8338	134676	Bacteria	Actinobacteria	Actinobacteria	Micromonosporales	Micromonosporaceae	Actinoplanes	Actinoplanes sp. SE50/110
ruderals	0.050063	8337	1076	Bacteria	Proteobacteria	Alphaproteobacteria	Rhizobiales	Bradyrhizobiaceae	Rhodopseudomonas	Rhodopseudomonas palustris
tomato	0.058027	8332	52	Bacteria	Proteobacteria	Deltaproteobacteria	Myxococcales	Polyangiaceae	Chondromyces	Chondromyces crocatus
tomato	0.049475	8331	284016	Bacteria	Proteobacteria	Alphaproteobacteria	Caulobacterales	Caulobacteraceae	Phenylobacterium	Phenylobacterium zucineum
ruderals	0.050257	8319	1577686	Bacteria	Acidobacteria	Acidobacteriia	Acidobacteriales	Acidobacteriaceae	Silvibacterium	Silvibacterium bohemicum
soil	0.060404	8313	52	Bacteria	Proteobacteria	Deltaproteobacteria	Myxococcales	Polyangiaceae	Chondromyces	Chondromyces crocatus
ruderals	0.050214	8312	1577687	Bacteria	Acidobacteria	Acidobacteriia	Acidobacteriales	Acidobacteriaceae	Terracidiphilus	Terracidiphilus gabretensis
tomato	0.057867	8309	1904640	Bacteria	Proteobacteria	Betaproteobacteria	NA	NA	NA	Betaproteobacteria bacterium GR16-43
ruderals	0.052781	8304	1632864	Bacteria	Planctomycetes	Planctomycetia	Planctomycetales	Planctomycetaceae	Planctomyces	Planctomyces sp. SH-PL14
soil	0.061074	8303	33876	Bacteria	Actinobacteria	Actinobacteria	Micromonosporales	Micromonosporaceae	Catenuloplanes	Catenuloplanes japonicus
ruderals	0.069636	8299	107709	Bacteria	Verrucomicrobia	Opitutae	Opitutales	Opitutaceae	Opitutus	Opitutus terrae
ruderals	0.04953	8299	1465490	Bacteria	Bacteroidetes	Chitinophagia	Chitinophagales	Chitinophagaceae	Parafilimonas	Parafilimonas terrae
ruderals	0.056118	6688	588596	Eukaryota	Mucoromycota	Glomeromycetes	Glomerales	Glomeraceae	Rhizophagus	Rhizophagus irregularis
ruderals	0.049829	8298	1710355	Bacteria	Actinobacteria	Actinobacteria	Micromonosporales	Micromonosporaceae	Actinoplanes	Actinoplanes sp. TFC3
soil	0.056037	8298	1650658	Bacteria	Actinobacteria	Actinobacteria	NA	NA	NA	Actinobacteria bacterium IMCC26256
ruderals	0.049811	8295	1470358	Bacteria	Actinobacteria	Actinobacteria	Geodermatophilales	Geodermatophilaceae	Blastococcus	Candidatus Blastococcus massiliensis
tomato	0.057707	8286	674703	Bacteria	Proteobacteria	Alphaproteobacteria	Rhizobiales	Hyphomicrobiaceae	Rhodoplanes	Rhodoplanes sp. Z2-YC6860
soil	0.060897	8279	1492898	Bacteria	Bacteroidetes	Chitinophagia	Chitinophagales	Chitinophagaceae	Flavisolibacter	Flavisolibacter sp. LCS9
ruderals	0.049601	8260	113571	Bacteria	Actinobacteria	Actinobacteria	Micromonosporales	Micromonosporaceae	Actinoplanes	Actinoplanes rectilineatus
ruderals	0.049559	8253	1380356	Bacteria	Actinobacteria	Actinobacteria	Geodermatophilales	Geodermatophilaceae	Blastococcus	Blastococcus sp. URHD0036
tomato	0.055415	8252	1866	Bacteria	Actinobacteria	Actinobacteria	Micromonosporales	Micromonosporaceae	Actinoplanes	Actinoplanes missouriensis
ruderals	0.069208	8248	1803507	Bacteria	Proteobacteria	Alphaproteobacteria	NA	NA	NA	Alphaproteobacteria bacterium 13_2_20CM_2_64_7
ruderals	0.049511	8245	1895839	Bacteria	Bacteroidetes	Sphingobacteriia	Sphingobacteriales	NA	NA	Sphingobacteriales bacterium 46-32
ruderals	0.049773	8239	1860096	Bacteria	Proteobacteria	Alphaproteobacteria	Rhizobiales	Rhizobiaceae	Rhizobium	Rhizobium sp. YK2
soil	0.066289	8235	1797662	Bacteria	Chloroflexi	NA	NA	NA	NA	Chloroflexi bacterium RBG_16_70_13
tomato	0.05571	9381	588596	Eukaryota	Mucoromycota	Glomeromycetes	Glomerales	Glomeraceae	Rhizophagus	Rhizophagus irregularis
tomato	0.055288	8233	113565	Bacteria	Actinobacteria	Actinobacteria	Micromonosporales	Micromonosporaceae	Actinoplanes	Actinoplanes globisporus
tomato	0.048851	8226	465721	Bacteria	Proteobacteria	Gammaproteobacteria	Nevskiales	Sinobacteraceae	Steroidobacter	Steroidobacter denitrificans
tomato	0.055678	8218	1691979	Bacteria	Bacteroidetes	Chitinophagia	Chitinophagales	Chitinophagaceae	NA	Chitinophagaceae bacterium PMP191F
tomato	0.057213	8215	1895835	Bacteria	Bacteroidetes	Sphingobacteriia	Sphingobacteriales	NA	NA	Sphingobacteriales bacterium 40-81
soil	0.060404	8212	485602	Bacteria	Actinobacteria	Actinobacteria	Pseudonocardiales	Pseudonocardiaceae	Actinophytocola	Actinophytocola xinjiangensis
ruderals	0.05219	8211	134849	Bacteria	Actinobacteria	Actinobacteria	Frankiales	Cryptosporangiaceae	Cryptosporangium	Cryptosporangium aurantiacum
ruderals	0.068889	8210	454194	Bacteria	Acidobacteria	Blastocatellia	NA	NA	Pyrinomonas	Pyrinomonas methylaliphatogenes
ruderals	0.048993	8209	1803447	Bacteria	Acidobacteria	NA	NA	NA	NA	Acidobacteria bacterium 13_1_40CM_3_55_6
tomato	0.059542	8206	80816	Bacteria	Proteobacteria	Deltaproteobacteria	Myxococcales	Kofleriaceae	Haliangium	Haliangium ochraceum
tomato	0.05944	8192	1961110	Bacteria	Bacteroidetes	Sphingobacteriia	Sphingobacteriales	NA	NA	Sphingobacteriales bacterium UTBCD1
soil	0.061489	8191	1895832	Bacteria	Actinobacteria	Thermoleophilia	Solirubrobacterales	NA	NA	Solirubrobacterales bacterium 67-14
ruderals	0.068721	8190	1437360	Bacteria	Proteobacteria	Alphaproteobacteria	Rhizobiales	Bradyrhizobiaceae	Bradyrhizobium	Bradyrhizobium erythrophlei
ruderals	0.05205	8189	36814	Bacteria	Actinobacteria	Actinobacteria	Corynebacteriales	Mycobacteriaceae	Mycobacterium	Mycobacterium rhodesiae
soil	0.055986	8178	688867	Bacteria	Bacteroidetes	Cytophagia	Cytophagales	Cytophagaceae	Ohtaekwangia	Ohtaekwangia koreensis
ruderals	0.049362	8171	1691979	Bacteria	Bacteroidetes	Chitinophagia	Chitinophagales	Chitinophagaceae	NA	Chitinophagaceae bacterium PMP191F
tomato	0.048477	8163	1797501	Bacteria	Proteobacteria	Betaproteobacteria	NA	NA	NA	Betaproteobacteria bacterium RIFCSPLOWO2_12_FULL_65_14
soil	0.055091	8158	1768806	Bacteria	Proteobacteria	Alphaproteobacteria	Rhodospirillales	Rhodospirillaceae	NA	Rhodospirillaceae bacterium CCH5-H10
soil	0.061136	8144	1617423	Bacteria	Acidobacteria	NA	NA	NA	NA	Acidobacteria bacterium OLB17
tomato	0.054683	8143	659014	Bacteria	Bacteroidetes	Cytophagia	Cytophagales	Cytophagaceae	Dyadobacter	Dyadobacter soli
soil	0.061024	8129	1797663	Bacteria	Chloroflexi	NA	NA	NA	NA	Chloroflexi bacterium RBG_16_72_14
ruderals	0.051649	8126	639030	Bacteria	Acidobacteria	Acidobacteriia	Acidobacteriales	Acidobacteriaceae	NA	Acidobacteria bacterium KBS 146
soil	0.055603	8122	1797662	Bacteria	Chloroflexi	NA	NA	NA	NA	Chloroflexi bacterium RBG_16_70_13
ruderals	0.04906	8121	1803475	Bacteria	Actinobacteria	NA	NA	NA	NA	Actinobacteria bacterium 13_1_20CM_3_68_9
ruderals	0.048712	8112	1803447	Bacteria	Acidobacteria	NA	NA	NA	NA	Acidobacteria bacterium 13_1_40CM_3_55_6
ruderals	0.05156	8112	1838286	Bacteria	Verrucomicrobia	Opitutae	Opitutales	Opitutaceae	Lacunisphaera	Lacunisphaera limnophila
soil	0.065251	8106	1861	Bacteria	Actinobacteria	Actinobacteria	Geodermatophilales	Geodermatophilaceae	Geodermatophilus	Geodermatophilus obscurus
ruderals	0.048622	8097	549386	Bacteria	Proteobacteria	Alphaproteobacteria	Rhizobiales	Methylobacteriaceae	Microvirga	Microvirga guangxiensis
ruderals	0.04861	8095	1097667	Bacteria	Actinobacteria	Thermoleophilia	Solirubrobacterales	Patulibacteraceae	Patulibacter	Patulibacter medicamentivorans
tomato	0.054838	8094	354356	Bacteria	Bacteroidetes	Chitinophagia	Chitinophagales	Chitinophagaceae	Niastella	Niastella koreensis
soil	0.054632	8090	1895838	Bacteria	Bacteroidetes	Sphingobacteriia	Sphingobacteriales	NA	NA	Sphingobacteriales bacterium 44-61
soil	0.055301	8078	54	Bacteria	Proteobacteria	Deltaproteobacteria	Myxococcales	Nannocystaceae	Nannocystis	Nannocystis exedens
tomato	0.054689	8072	1353260	Archaea	Thaumarchaeota	Nitrososphaeria	Nitrososphaerales	Nitrososphaeraceae	Candidatus Nitrosocosmicus	Candidatus Nitrocosmicus oleophilus
tomato	0.058548	8069	864051	Bacteria	Proteobacteria	Betaproteobacteria	Burkholderiales	NA	NA	Burkholderiales bacterium JOSHI_001
tomato	0.04783	8054	1855519	Bacteria	Proteobacteria	Alphaproteobacteria	Sphingomonadales	Sphingomonadaceae	Sphingobium	Sphingobium sp. EP60837
ruderals	0.051185	8053	1882749	Bacteria	Verrucomicrobia	Opitutae	Opitutales	Opitutaceae	Opitutus	Opitutus sp. GAS368
ruderals	0.06753	8048	1380390	Bacteria	Actinobacteria	Thermoleophilia	Solirubrobacterales	NA	NA	Solirubrobacterales bacterium URHD0059
ruderals	0.051141	8046	462367	Bacteria	Bacteroidetes	Chitinophagia	Chitinophagales	Chitinophagaceae	Flavisolibacter	Flavisolibacter ginsengisoli
tomato	0.047723	8036	1391654	Bacteria	Proteobacteria	Deltaproteobacteria	Myxococcales	Labilitrichaceae	Labilithrix	Labilithrix luteola
tomato	0.053931	8031	1660160	Bacteria	Acidobacteria	NA	NA	NA	NA	Acidobacteria bacterium SCN 69-37
tomato	0.05575	8005	1463156	Bacteria	Bacteroidetes	Chitinophagia	Chitinophagales	Chitinophagaceae	Flavihumibacter	Flavihumibacter sp. ZG627
soil	0.058086	7994	454194	Bacteria	Acidobacteria	Blastocatellia	NA	NA	Pyrinomonas	Pyrinomonas methylaliphatogenes
soil	0.05397	7992	360056	Bacteria	Planctomycetes	Planctomycetia	Planctomycetales	Planctomycetaceae	Schlesneria	Schlesneria paludicola
ruderals	0.050766	7987	134676	Bacteria	Actinobacteria	Actinobacteria	Micromonosporales	Micromonosporaceae	Actinoplanes	Actinoplanes sp. SE50/110
tomato	0.053615	7984	1379270	Bacteria	Gemmatimonadetes	Gemmatimonadetes	Gemmatimonadales	Gemmatimonadaceae	Gemmatimonas	Gemmatimonas phototrophica
soil	0.053889	7980	196914	Bacteria	Actinobacteria	Actinobacteria	Micromonosporales	Micromonosporaceae	Actinoplanes	Actinoplanes friuliensis
tomato	0.054025	7974	56438	Bacteria	Actinobacteria	Actinobacteria	Micromonosporales	Micromonosporaceae	Couchioplanes	Couchioplanes caeruleus
soil	0.05861	7968	48	Bacteria	Proteobacteria	Deltaproteobacteria	Myxococcales	Archangiaceae	Archangium	Archangium gephyra
tomato	0.055478	7966	549295	Bacteria	Bacteroidetes	Chitinophagia	Chitinophagales	Chitinophagaceae	Flavihumibacter	Flavihumibacter petaseus
soil	0.054452	7954	134849	Bacteria	Actinobacteria	Actinobacteria	Frankiales	Cryptosporangiaceae	Cryptosporangium	Cryptosporangium aurantiacum
soil	0.064027	7954	394096	Bacteria	Proteobacteria	Deltaproteobacteria	Myxococcales	Archangiaceae	Hyalangium	Hyalangium minutum
ruderals	0.047733	7949	1123067	Bacteria	Proteobacteria	Alphaproteobacteria	Rhodobacterales	Rhodobacteraceae	Rubellimicrobium	Rubellimicrobium mesophilum
tomato	0.05336	7946	1895838	Bacteria	Bacteroidetes	Sphingobacteriia	Sphingobacteriales	NA	NA	Sphingobacteriales bacterium 44-61
soil	0.05437	7942	51	Bacteria	Proteobacteria	Deltaproteobacteria	Myxococcales	Polyangiaceae	Chondromyces	Chondromyces apiculatus
ruderals	0.050467	7940	414050	Bacteria	Proteobacteria	Gammaproteobacteria	Xanthomonadales	Xanthomonadaceae	Lysobacter	Lysobacter dokdonensis
soil	0.063907	7939	1803462	Bacteria	Acidobacteria	NA	NA	NA	NA	Acidobacteria bacterium 13_2_20CM_2_66_4
tomato	0.055242	7932	1736434	Bacteria	Proteobacteria	Betaproteobacteria	Burkholderiales	Comamonadaceae	Pelomonas	Pelomonas sp. Root1237
soil	0.053423	7911	1895809	Bacteria	Actinobacteria	Actinobacteria	Pseudonocardiales	Pseudonocardiaceae	Pseudonocardia	Pseudonocardia sp. 73-21
ruderals	0.047725	7900	1895814	Bacteria	Proteobacteria	Alphaproteobacteria	Rhizobiales	NA	NA	Rhizobiales bacterium 64-17
ruderals	0.047373	7889	1881035	Bacteria	Proteobacteria	Betaproteobacteria	Burkholderiales	NA	Mitsuaria	Mitsuaria sp. PDC51
tomato	0.054928	7887	360055	Bacteria	Planctomycetes	Planctomycetia	Planctomycetales	Gemmataceae	Zavarzinella	Zavarzinella formosa
tomato	0.053429	7886	1855519	Bacteria	Proteobacteria	Alphaproteobacteria	Sphingomonadales	Sphingomonadaceae	Sphingobium	Sphingobium sp. EP60837
ruderals	0.047623	7883	462367	Bacteria	Bacteroidetes	Chitinophagia	Chitinophagales	Chitinophagaceae	Flavisolibacter	Flavisolibacter ginsengisoli
soil	0.057977	7882	1070870	Bacteria	Actinobacteria	Actinobacteria	Geodermatophilales	Geodermatophilaceae	Geodermatophilus	Geodermatophilus nigrescens
tomato	0.057191	7882	1660160	Bacteria	Acidobacteria	NA	NA	NA	NA	Acidobacteria bacterium SCN 69-37
tomato	0.054879	7880	114	Bacteria	Planctomycetes	Planctomycetia	Planctomycetales	Gemmataceae	Gemmata	Gemmata obscuriglobus
ruderals	0.050079	7879	1247514	Bacteria	Proteobacteria	Gammaproteobacteria	Xanthomonadales	Xanthomonadaceae	Luteimonas	Luteimonas abyssi
tomato	0.053334	7872	1961110	Bacteria	Bacteroidetes	Sphingobacteriia	Sphingobacteriales	NA	NA	Sphingobacteriales bacterium UTBCD1
ruderals	0.066011	7867	1703404	Bacteria	Proteobacteria	Gammaproteobacteria	NA	NA	NA	Gammaproteobacteria bacterium SG8_30
tomato	0.054754	7862	1267766	Bacteria	Proteobacteria	Alphaproteobacteria	Sphingomonadales	Erythrobacteraceae	Altererythrobacter	Altererythrobacter atlanticus
tomato	0.057038	7861	391953	Bacteria	Proteobacteria	Betaproteobacteria	Burkholderiales	NA	Aquincola	Aquincola tertiaricarbonis
tomato	0.057024	7859	1759059	Bacteria	Proteobacteria	Alphaproteobacteria	Caulobacterales	Caulobacteraceae	NA	Caulobacteraceae bacterium OTSz_A_272
ruderals	0.046898	7858	1736365	Bacteria	Proteobacteria	Betaproteobacteria	Burkholderiales	Comamonadaceae	Ramlibacter	Ramlibacter sp. Leaf400
ruderals	0.049895	7850	402650	Bacteria	Actinobacteria	Actinobacteria	Pseudonocardiales	Pseudonocardiaceae	Actinomycetospora	Actinomycetospora chiangmaiensis
soil	0.063086	7837	1797504	Bacteria	Proteobacteria	Betaproteobacteria	NA	NA	NA	Betaproteobacteria bacterium RIFCSPLOWO2_12_FULL_68_19
tomato	0.053056	7831	314722	Bacteria	Proteobacteria	Gammaproteobacteria	Xanthomonadales	Xanthomonadaceae	Pseudoxanthomonas	Pseudoxanthomonas suwonensis
tomato	0.052568	7828	173480	Bacteria	Gemmatimonadetes	Gemmatimonadetes	Gemmatimonadales	Gemmatimonadaceae	Gemmatimonas	Gemmatimonas aurantiaca
soil	0.058757	7827	550983	Bacteria	Bacteroidetes	Chitinophagia	Chitinophagales	Chitinophagaceae	Niastella	Niastella populi
soil	0.052856	7827	182640	Bacteria	Actinobacteria	Actinobacteria	Propionibacteriales	Nocardioidaceae	Kribbella	Kribbella flavida
ruderals	0.046971	7822	137265	Bacteria	Actinobacteria	Actinobacteria	Micromonosporales	Micromonosporaceae	Asanoa	Asanoa ishikariensis
tomato	0.056741	7820	1838286	Bacteria	Verrucomicrobia	Opitutae	Opitutales	Opitutaceae	Lacunisphaera	Lacunisphaera limnophila
ruderals	0.046647	7816	1799658	Bacteria	Planctomycetes	Planctomycetia	Planctomycetales	Planctomycetaceae	NA	Planctomycetaceae bacterium SCGC AG-212-F19
tomato	0.056683	7812	1492898	Bacteria	Bacteroidetes	Chitinophagia	Chitinophagales	Chitinophagaceae	Flavisolibacter	Flavisolibacter sp. LCS9
soil	0.053112	6598	588596	Eukaryota	Mucoromycota	Glomeromycetes	Glomerales	Glomeraceae	Rhizophagus	Rhizophagus irregularis
ruderals	0.049641	7810	360055	Bacteria	Planctomycetes	Planctomycetia	Planctomycetales	Gemmataceae	Zavarzinella	Zavarzinella formosa
soil	0.056691	7802	1797193	Bacteria	Acidobacteria	NA	NA	NA	NA	Acidobacteria bacterium RIFCSPLOWO2_12_FULL_67_14b
ruderals	0.046552	7800	1686064	Bacteria	Proteobacteria	Betaproteobacteria	Burkholderiales	NA	Methylibium	Methylibium sp. NZG
soil	0.062772	7798	404900	Bacteria	Proteobacteria	Alphaproteobacteria	NA	NA	Geminicoccus	Geminicoccus roseus
tomato	0.054274	7793	1267535	Bacteria	Acidobacteria	Acidobacteriia	Acidobacteriales	Acidobacteriaceae	NA	Acidobacteriaceae bacterium KBS 96
soil	0.056618	7792	345341	Bacteria	Actinobacteria	Actinobacteria	Pseudonocardiales	Pseudonocardiaceae	Kutzneria	Kutzneria sp. 744
tomato	0.052765	7788	1391654	Bacteria	Proteobacteria	Deltaproteobacteria	Myxococcales	Labilitrichaceae	Labilithrix	Labilithrix luteola
soil	0.057249	7783	927083	Bacteria	Proteobacteria	Deltaproteobacteria	Myxococcales	Sandaracinaceae	Sandaracinus	Sandaracinus amylolyticus
tomato	0.056465	7782	360055	Bacteria	Planctomycetes	Planctomycetia	Planctomycetales	Gemmataceae	Zavarzinella	Zavarzinella formosa
tomato	0.052219	7776	155892	Bacteria	Proteobacteria	Alphaproteobacteria	Caulobacterales	Caulobacteraceae	Caulobacter	Caulobacter vibrioides
tomato	0.056407	7774	465721	Bacteria	Proteobacteria	Gammaproteobacteria	Nevskiales	Sinobacteraceae	Steroidobacter	Steroidobacter denitrificans
soil	0.058351	7773	1380353	Bacteria	Actinobacteria	Actinobacteria	Geodermatophilales	Geodermatophilaceae	NA	Geodermatophilaceae bacterium URHB0062
ruderals	0.046391	7773	1660160	Bacteria	Acidobacteria	NA	NA	NA	NA	Acidobacteria bacterium SCN 69-37
soil	0.056444	7768	1267534	Bacteria	Acidobacteria	Acidobacteriia	Acidobacteriales	Acidobacteriaceae	NA	Acidobacteriaceae bacterium KBS 89
tomato	0.052158	7767	1861	Bacteria	Actinobacteria	Actinobacteria	Geodermatophilales	Geodermatophilaceae	Geodermatophilus	Geodermatophilus obscurus
soil	0.062522	7767	1225564	Bacteria	Proteobacteria	Alphaproteobacteria	Rhizobiales	Methylobacteriaceae	Microvirga	Microvirga vignae
tomato	0.046084	7760	1798228	Bacteria	Actinobacteria	Actinobacteria	Geodermatophilales	Geodermatophilaceae	Blastococcus	Blastococcus sp. DSM 46838
tomato	0.052071	7754	80816	Bacteria	Proteobacteria	Deltaproteobacteria	Myxococcales	Kofleriaceae	Haliangium	Haliangium ochraceum
tomato	0.052057	7752	1938605	Bacteria	Proteobacteria	Alphaproteobacteria	Caulobacterales	Caulobacteraceae	Brevundimonas	Brevundimonas sp. LM2
ruderals	0.046532	7749	722472	Bacteria	Proteobacteria	Alphaproteobacteria	Rhizobiales	Bradyrhizobiaceae	Bradyrhizobium	Bradyrhizobium lablabi
ruderals	0.0464	7727	1391654	Bacteria	Proteobacteria	Deltaproteobacteria	Myxococcales	Labilitrichaceae	Labilithrix	Labilithrix luteola
soil	0.052147	7722	1797492	Bacteria	Proteobacteria	Betaproteobacteria	NA	NA	NA	Betaproteobacteria bacterium RIFCSPLOWO2_02_FULL_67_26
soil	0.05285	7720	360054	Bacteria	Acidobacteria	Solibacteres	Solibacterales	Bryobacteraceae	Bryobacter	Bryobacter aggregatus
tomato	0.051836	7719	35754	Bacteria	Actinobacteria	Actinobacteria	Micromonosporales	Micromonosporaceae	Dactylosporangium	Dactylosporangium aurantiacum
ruderals	0.046334	7716	1632864	Bacteria	Planctomycetes	Planctomycetia	Planctomycetales	Planctomycetaceae	Planctomyces	Planctomyces sp. SH-PL14
soil	0.057901	7713	1380391	Bacteria	Proteobacteria	Alphaproteobacteria	Rhodospirillales	Rhodospirillaceae	Dongia	Dongia sp. URHE0060
tomato	0.055906	7705	1799662	Bacteria	Proteobacteria	Betaproteobacteria	NA	NA	NA	Betaproteobacteria bacterium SCGC AG-212-J23
soil	0.056668	7704	173480	Bacteria	Gemmatimonadetes	Gemmatimonadetes	Gemmatimonadales	Gemmatimonadaceae	Gemmatimonas	Gemmatimonas aurantiaca
soil	0.052734	7703	1429916	Bacteria	Proteobacteria	Alphaproteobacteria	Rhizobiales	Bradyrhizobiaceae	Afipia	Afipia sp. P52-10
ruderals	0.048961	7703	360054	Bacteria	Acidobacteria	Solibacteres	Solibacterales	Bryobacteraceae	Bryobacter	Bryobacter aggregatus
soil	0.061983	7700	80816	Bacteria	Proteobacteria	Deltaproteobacteria	Myxococcales	Kofleriaceae	Haliangium	Haliangium ochraceum
soil	0.056631	7699	80816	Bacteria	Proteobacteria	Deltaproteobacteria	Myxococcales	Kofleriaceae	Haliangium	Haliangium ochraceum
tomato	0.051668	7694	68170	Bacteria	Actinobacteria	Actinobacteria	Pseudonocardiales	Pseudonocardiaceae	Lechevalieria	Lechevalieria aerocolonigenes
ruderals	0.04589	7689	1895833	Bacteria	Actinobacteria	Thermoleophilia	Solirubrobacterales	NA	NA	Solirubrobacterales bacterium 70-9
ruderals	0.046451	7689	135946	Bacteria	Actinobacteria	Actinobacteria	Micromonosporales	Micromonosporaceae	Actinoplanes	Actinoplanes awajinensis
tomato	0.04565	7687	1437360	Bacteria	Proteobacteria	Alphaproteobacteria	Rhizobiales	Bradyrhizobiaceae	Bradyrhizobium	Bradyrhizobium erythrophlei
ruderals	0.04616	7687	1550230	Bacteria	Actinobacteria	Actinobacteria	Geodermatophilales	Geodermatophilaceae	Modestobacter	Modestobacter sp. DSM 44400
ruderals	0.06445	7681	1961100	Bacteria	Chloroflexi	Anaerolineae	NA	NA	NA	Anaerolineae bacterium UTCFX1
tomato	0.045614	7681	1803507	Bacteria	Proteobacteria	Alphaproteobacteria	NA	NA	NA	Alphaproteobacteria bacterium 13_2_20CM_2_64_7
ruderals	0.048821	7681	80871	Bacteria	Actinobacteria	Actinobacteria	Frankiales	Cryptosporangiaceae	Cryptosporangium	Cryptosporangium arvum
tomato	0.052006	7676	75922	Bacteria	Actinobacteria	Actinobacteria	Corynebacteriales	Mycobacteriaceae	Mycobacterium	Mycobacterium tusciae
ruderals	0.045806	7675	477680	Bacteria	Bacteroidetes	Chitinophagia	Chitinophagales	Chitinophagaceae	Filimonas	Filimonas lacunae
ruderals	0.048783	7675	52	Bacteria	Proteobacteria	Deltaproteobacteria	Myxococcales	Polyangiaceae	Chondromyces	Chondromyces crocatus
soil	0.061733	7669	186479	Bacteria	Chloroflexi	NA	NA	NA	Kouleothrix	Kouleothrix aurantiaca
soil	0.05751	7661	1797504	Bacteria	Proteobacteria	Betaproteobacteria	NA	NA	NA	Betaproteobacteria bacterium RIFCSPLOWO2_12_FULL_68_19
ruderals	0.048675	7658	182640	Bacteria	Actinobacteria	Actinobacteria	Propionibacteriales	Nocardioidaceae	Kribbella	Kribbella flavida
ruderals	0.048656	7655	345309	Bacteria	Proteobacteria	Gammaproteobacteria	Xanthomonadales	Rhodanobacteraceae	Luteibacter	Luteibacter yeojuensis
soil	0.051695	7655	1799655	Bacteria	Proteobacteria	Alphaproteobacteria	Micropepsales	Micropepsaceae	Rhizomicrobium	Rhizomicrobium sp. SCGC AG-212-E05
soil	0.056219	7643	94132	Bacteria	Proteobacteria	Betaproteobacteria	Burkholderiales	Comamonadaceae	Ramlibacter	Ramlibacter tataouinensis
ruderals	0.046173	7643	1379159	Bacteria	Proteobacteria	Gammaproteobacteria	Xanthomonadales	Rhodanobacteraceae	Dyella	Dyella jiangningensis
ruderals	0.046155	7640	477680	Bacteria	Bacteroidetes	Chitinophagia	Chitinophagales	Chitinophagaceae	Filimonas	Filimonas lacunae
soil	0.061451	7634	1032527	Bacteria	Verrucomicrobia	Verrucomicrobiae	Verrucomicrobiales	Verrucomicrobia subdivision 3	Pedosphaera	Pedosphaera parvula
tomato	0.051674	7627	1492898	Bacteria	Bacteroidetes	Chitinophagia	Chitinophagales	Chitinophagaceae	Flavisolibacter	Flavisolibacter sp. LCS9
soil	0.051445	7618	1429916	Bacteria	Proteobacteria	Alphaproteobacteria	Rhizobiales	Bradyrhizobiaceae	Afipia	Afipia sp. P52-10
tomato	0.051064	7604	1736365	Bacteria	Proteobacteria	Betaproteobacteria	Burkholderiales	Comamonadaceae	Ramlibacter	Ramlibacter sp. Leaf400
soil	0.06117	7599	888845	Bacteria	Proteobacteria	Deltaproteobacteria	Myxococcales	NA	Minicystis	Minicystis rosea
soil	0.055187	7595	225324	Bacteria	Proteobacteria	Alphaproteobacteria	Rhodospirillales	NA	Enhydrobacter	Enhydrobacter aerosaccus
tomato	0.05143	7591	1895841	Bacteria	Bacteroidetes	Sphingobacteriia	Sphingobacteriales	NA	NA	Sphingobacteriales bacterium 50-39
ruderals	0.045853	7590	1797501	Bacteria	Proteobacteria	Betaproteobacteria	NA	NA	NA	Betaproteobacteria bacterium RIFCSPLOWO2_12_FULL_65_14
tomato	0.050963	7589	360056	Bacteria	Planctomycetes	Planctomycetia	Planctomycetales	Planctomycetaceae	Schlesneria	Schlesneria paludicola
soil	0.051208	7583	1380348	Bacteria	Acidobacteria	Acidobacteriia	Acidobacteriales	Acidobacteriaceae	NA	Acidobacteriaceae bacterium URHE0068
tomato	0.054956	7574	125	Bacteria	Planctomycetes	Planctomycetia	Planctomycetales	Planctomycetaceae	Pirellula	Pirellula staleyi
soil	0.055689	7571	1391654	Bacteria	Proteobacteria	Deltaproteobacteria	Myxococcales	Labilitrichaceae	Labilithrix	Labilithrix luteola
soil	0.051107	7568	1632864	Bacteria	Planctomycetes	Planctomycetia	Planctomycetales	Planctomycetaceae	Planctomyces	Planctomyces sp. SH-PL14
tomato	0.050708	7551	1429438	Bacteria	Candidatus Tectomicrobia	NA	NA	NA	Candidatus Entotheonella	Candidatus Entotheonella sp. TSY1
ruderals	0.045054	7549	1547922	Bacteria	Proteobacteria	Betaproteobacteria	Burkholderiales	NA	Ideonella	Ideonella sakaiensis
tomato	0.052477	7535	360054	Bacteria	Acidobacteria	Solibacteres	Solibacterales	Bryobacteraceae	Bryobacter	Bryobacter aggregatus
tomato	0.05099	7526	1076	Bacteria	Proteobacteria	Alphaproteobacteria	Rhizobiales	Bradyrhizobiaceae	Rhodopseudomonas	Rhodopseudomonas palustris
soil	0.050824	7526	1882752	Bacteria	Planctomycetes	Planctomycetia	Planctomycetales	Isosphaeraceae	Singulisphaera	Singulisphaera sp. GP187
tomato	0.052351	7517	414050	Bacteria	Proteobacteria	Gammaproteobacteria	Xanthomonadales	Xanthomonadaceae	Lysobacter	Lysobacter dokdonensis
soil	0.055285	7516	1379270	Bacteria	Gemmatimonadetes	Gemmatimonadetes	Gemmatimonadales	Gemmatimonadaceae	Gemmatimonas	Gemmatimonas phototrophica
soil	0.054598	7514	722472	Bacteria	Proteobacteria	Alphaproteobacteria	Rhizobiales	Bradyrhizobiaceae	Bradyrhizobium	Bradyrhizobium lablabi
soil	0.051433	7513	1632864	Bacteria	Planctomycetes	Planctomycetia	Planctomycetales	Planctomycetaceae	Planctomyces	Planctomyces sp. SH-PL14
soil	0.050736	7513	35751	Bacteria	Actinobacteria	Actinobacteria	Frankiales	Sporichthyaceae	Sporichthya	Sporichthya polymorpha
ruderals	0.04774	7511	1736501	Bacteria	Proteobacteria	Alphaproteobacteria	Sphingomonadales	Sphingomonadaceae	Sphingomonas	Sphingomonas sp. Root241
tomato	0.054484	7509	482630	Bacteria	Cyanobacteria	NA	Nostocales	Tolypothrichaceae	Hassallia	Hassallia byssoidea
soil	0.055219	7507	1895809	Bacteria	Actinobacteria	Actinobacteria	Pseudonocardiales	Pseudonocardiaceae	Pseudonocardia	Pseudonocardia sp. 73-21
soil	0.055211	7506	1904640	Bacteria	Proteobacteria	Betaproteobacteria	NA	NA	NA	Betaproteobacteria bacterium GR16-43
tomato	0.054455	7505	398037	Bacteria	Bacteroidetes	Chitinophagia	Chitinophagales	Chitinophagaceae	Segetibacter	Segetibacter koreensis
ruderals	0.047664	7499	114	Bacteria	Planctomycetes	Planctomycetia	Planctomycetales	Gemmataceae	Gemmata	Gemmata obscuriglobus
soil	0.056287	7498	35752	Bacteria	Actinobacteria	Actinobacteria	Micromonosporales	Micromonosporaceae	Actinoplanes	Actinoplanes philippinensis
soil	0.051331	7498	1882749	Bacteria	Verrucomicrobia	Opitutae	Opitutales	Opitutaceae	Opitutus	Opitutus sp. GAS368
ruderals	0.045273	7494	940614	Bacteria	Acidobacteria	Acidobacteriia	Acidobacteriales	Acidobacteriaceae	Granulicella	Granulicella mallensis
ruderals	0.044923	7481	80871	Bacteria	Actinobacteria	Actinobacteria	Frankiales	Cryptosporangiaceae	Cryptosporangium	Cryptosporangium arvum
ruderals	0.044636	7479	1710355	Bacteria	Actinobacteria	Actinobacteria	Micromonosporales	Micromonosporaceae	Actinoplanes	Actinoplanes sp. TFC3
tomato	0.050184	7473	45677	Bacteria	Proteobacteria	Betaproteobacteria	Burkholderiales	Alcaligenaceae	Azohydromonas	Azohydromonas lata
ruderals	0.047499	7473	40681	Bacteria	Proteobacteria	Alphaproteobacteria	Sphingomonadales	Sphingomonadaceae	Sphingomonas	Sphingomonas asaccharolytica
ruderals	0.051072	8454	1306850	Eukaryota	Basidiomycota	Agaricomycetes	Agaricales	Lyophyllaceae	Termitomyces	Termitomyces sp. J132
ruderals	0.045079	7462	323415	Bacteria	Proteobacteria	Gammaproteobacteria	Xanthomonadales	Rhodanobacteraceae	Dokdonella	Dokdonella koreensis
ruderals	0.045055	7458	685778	Bacteria	Proteobacteria	Alphaproteobacteria	Sphingomonadales	Sphingomonadaceae	Sphingomonas	Sphingomonas sp. PR090111-T3T-6A
ruderals	0.044743	7451	113562	Bacteria	Actinobacteria	Actinobacteria	Micromonosporales	Micromonosporaceae	Actinoplanes	Actinoplanes derwentensis
ruderals	0.047353	7450	284016	Bacteria	Proteobacteria	Alphaproteobacteria	Caulobacterales	Caulobacteraceae	Phenylobacterium	Phenylobacterium zucineum
soil	0.055866	7442	394096	Bacteria	Proteobacteria	Deltaproteobacteria	Myxococcales	Archangiaceae	Hyalangium	Hyalangium minutum
soil	0.054726	7440	1736431	Bacteria	Actinobacteria	Actinobacteria	Propionibacteriales	Nocardioidaceae	Nocardioides	Nocardioides sp. Root122
soil	0.050229	7438	54	Bacteria	Proteobacteria	Deltaproteobacteria	Myxococcales	Nannocystaceae	Nannocystis	Nannocystis exedens
ruderals	0.047264	7436	1855297	Bacteria	Bacteroidetes	Sphingobacteriia	Sphingobacteriales	Sphingobacteriaceae	Mucilaginibacter	Mucilaginibacter sp. OK098
ruderals	0.047251	7434	29448	Bacteria	Proteobacteria	Alphaproteobacteria	Rhizobiales	Bradyrhizobiaceae	Bradyrhizobium	Bradyrhizobium elkanii
tomato	0.049915	7433	407019	Bacteria	Proteobacteria	Alphaproteobacteria	Sphingomonadales	Sphingomonadaceae	Sphingomonas	Sphingomonas astaxanthinifaciens
tomato	0.049875	7427	196914	Bacteria	Actinobacteria	Actinobacteria	Micromonosporales	Micromonosporaceae	Actinoplanes	Actinoplanes friuliensis
ruderals	0.04432	7426	29448	Bacteria	Proteobacteria	Alphaproteobacteria	Rhizobiales	Bradyrhizobiaceae	Bradyrhizobium	Bradyrhizobium elkanii
tomato	0.051711	7425	1547922	Bacteria	Proteobacteria	Betaproteobacteria	Burkholderiales	NA	Ideonella	Ideonella sakaiensis
tomato	0.044094	7425	1380347	Bacteria	Actinobacteria	Actinobacteria	Geodermatophilales	Geodermatophilaceae	NA	Geodermatophilaceae bacterium URHB0048
ruderals	0.044587	7425	546871	Bacteria	Actinobacteria	Actinobacteria	Propionibacteriales	Nocardioidaceae	Friedmanniella	Friedmanniella luteola
tomato	0.053868	7424	135946	Bacteria	Actinobacteria	Actinobacteria	Micromonosporales	Micromonosporaceae	Actinoplanes	Actinoplanes awajinensis
tomato	0.050278	7421	360055	Bacteria	Planctomycetes	Planctomycetia	Planctomycetales	Gemmataceae	Zavarzinella	Zavarzinella formosa
soil	0.050108	7420	29448	Bacteria	Proteobacteria	Alphaproteobacteria	Rhizobiales	Bradyrhizobiaceae	Bradyrhizobium	Bradyrhizobium elkanii
soil	0.050776	7417	1797504	Bacteria	Proteobacteria	Betaproteobacteria	NA	NA	NA	Betaproteobacteria bacterium RIFCSPLOWO2_12_FULL_68_19
soil	0.050756	7414	375	Bacteria	Proteobacteria	Alphaproteobacteria	Rhizobiales	Bradyrhizobiaceae	Bradyrhizobium	Bradyrhizobium japonicum
soil	0.050033	7409	1895712	Bacteria	Proteobacteria	Alphaproteobacteria	NA	NA	NA	Alphaproteobacteria bacterium 65-7
tomato	0.051578	7406	413882	Bacteria	Proteobacteria	Betaproteobacteria	Burkholderiales	NA	NA	[Polyangium] brachysporum
ruderals	0.044195	7405	364039	Bacteria	Proteobacteria	Betaproteobacteria	Burkholderiales	Alcaligenaceae	Azohydromonas	Azohydromonas australica
tomato	0.050156	7403	284016	Bacteria	Proteobacteria	Alphaproteobacteria	Caulobacterales	Caulobacteraceae	Phenylobacterium	Phenylobacterium zucineum
soil	0.059576	7401	1798228	Bacteria	Actinobacteria	Actinobacteria	Geodermatophilales	Geodermatophilaceae	Blastococcus	Blastococcus sp. DSM 46838
tomato	0.043946	7400	107709	Bacteria	Verrucomicrobia	Opitutae	Opitutales	Opitutaceae	Opitutus	Opitutus terrae
tomato	0.051453	7388	1736430	Bacteria	Proteobacteria	Betaproteobacteria	Burkholderiales	Comamonadaceae	Pelomonas	Pelomonas sp. Root1217
tomato	0.04958	7383	1391654	Bacteria	Proteobacteria	Deltaproteobacteria	Myxococcales	Labilitrichaceae	Labilithrix	Labilithrix luteola
ruderals	0.0619	7377	1838286	Bacteria	Verrucomicrobia	Opitutae	Opitutales	Opitutaceae	Lacunisphaera	Lacunisphaera limnophila
ruderals	0.044021	7376	1895928	Bacteria	Chloroflexi	NA	NA	NA	NA	Chloroflexi bacterium 54-19
tomato	0.049974	7376	80816	Bacteria	Proteobacteria	Deltaproteobacteria	Myxococcales	Kofleriaceae	Haliangium	Haliangium ochraceum
soil	0.054233	7373	941907	Bacteria	Proteobacteria	Alphaproteobacteria	Sphingomonadales	Sphingomonadaceae	Sphingomonas	Sphingomonas indica
ruderals	0.044232	7366	52	Bacteria	Proteobacteria	Deltaproteobacteria	Myxococcales	Polyangiaceae	Chondromyces	Chondromyces crocatus
soil	0.053515	7365	394096	Bacteria	Proteobacteria	Deltaproteobacteria	Myxococcales	Archangiaceae	Hyalangium	Hyalangium minutum
soil	0.049736	7365	1097667	Bacteria	Actinobacteria	Thermoleophilia	Solirubrobacterales	Patulibacteraceae	Patulibacter	Patulibacter medicamentivorans
soil	0.050359	7356	52	Bacteria	Proteobacteria	Deltaproteobacteria	Myxococcales	Polyangiaceae	Chondromyces	Chondromyces crocatus
tomato	0.049378	7353	1380357	Bacteria	Proteobacteria	Alphaproteobacteria	Rhodospirillales	NA	NA	Rhodospirillales bacterium URHD0017
ruderals	0.044415	7352	1866	Bacteria	Actinobacteria	Actinobacteria	Micromonosporales	Micromonosporaceae	Actinoplanes	Actinoplanes missouriensis
tomato	0.043643	7349	498055	Bacteria	Proteobacteria	Gammaproteobacteria	Xanthomonadales	Xanthomonadaceae	Arenimonas	Arenimonas oryziterrae
tomato	0.043619	7345	1882682	Bacteria	Proteobacteria	Alphaproteobacteria	Rhizobiales	Methylobacteriaceae	Microvirga	Microvirga ossetica
soil	0.059101	7342	1380357	Bacteria	Proteobacteria	Alphaproteobacteria	Rhodospirillales	NA	NA	Rhodospirillales bacterium URHD0017
tomato	0.053265	7341	1895841	Bacteria	Bacteroidetes	Sphingobacteriia	Sphingobacteriales	NA	NA	Sphingobacteriales bacterium 50-39
ruderals	0.061589	7340	1619897	Bacteria	Bacteroidetes	NA	NA	NA	NA	Bacteroidetes bacterium OLB12
tomato	0.049723	7339	360054	Bacteria	Acidobacteria	Solibacteres	Solibacterales	Bryobacteraceae	Bryobacter	Bryobacter aggregatus
tomato	0.053229	7336	1736365	Bacteria	Proteobacteria	Betaproteobacteria	Burkholderiales	Comamonadaceae	Ramlibacter	Ramlibacter sp. Leaf400
soil	0.050215	7335	196914	Bacteria	Actinobacteria	Actinobacteria	Micromonosporales	Micromonosporaceae	Actinoplanes	Actinoplanes friuliensis
ruderals	0.046622	7335	1492898	Bacteria	Bacteroidetes	Chitinophagia	Chitinophagales	Chitinophagaceae	Flavisolibacter	Flavisolibacter sp. LCS9
tomato	0.050986	7321	465721	Bacteria	Proteobacteria	Gammaproteobacteria	Nevskiales	Sinobacteraceae	Steroidobacter	Steroidobacter denitrificans
soil	0.050119	7321	107709	Bacteria	Verrucomicrobia	Opitutae	Opitutales	Opitutaceae	Opitutus	Opitutus terrae
ruderals	0.043932	7316	673521	Bacteria	Actinobacteria	Actinobacteria	Geodermatophilales	Geodermatophilaceae	Blastococcus	Blastococcus endophyticus
tomato	0.049567	7316	1895832	Bacteria	Actinobacteria	Thermoleophilia	Solirubrobacterales	NA	NA	Solirubrobacterales bacterium 67-14
tomato	0.053077	7315	1691979	Bacteria	Bacteroidetes	Chitinophagia	Chitinophagales	Chitinophagaceae	NA	Chitinophagaceae bacterium PMP191F
tomato	0.043435	7314	1549810	Bacteria	Proteobacteria	Alphaproteobacteria	Rhizobiales	Methylobacteriaceae	Microvirga	Microvirga sp. BSC39
ruderals	0.061337	7310	1500261	Bacteria	Proteobacteria	Betaproteobacteria	Burkholderiales	NA	Methylibium	Methylibium sp. CF059
tomato	0.043393	7307	649831	Bacteria	Actinobacteria	Actinobacteria	Micromonosporales	Micromonosporaceae	Actinoplanes	Actinoplanes sp. N902-109
ruderals	0.043866	7305	38312	Bacteria	Actinobacteria	Actinobacteria	Corynebacteriales	Nocardiaceae	Rhodococcus	Rhodococcus rhodnii
tomato	0.053004	7305	1805166	Bacteria	Proteobacteria	Gammaproteobacteria	NA	NA	NA	Gammaproteobacteria bacterium 13_2_20CM_66_19
tomato	0.050868	7304	1882749	Bacteria	Verrucomicrobia	Opitutae	Opitutales	Opitutaceae	Opitutus	Opitutus sp. GAS368
tomato	0.052961	7299	1803462	Bacteria	Acidobacteria	NA	NA	NA	NA	Acidobacteria bacterium 13_2_20CM_2_66_4
ruderals	0.043818	7297	938405	Bacteria	Proteobacteria	Alphaproteobacteria	Rhodospirillales	Acetobacteraceae	Belnapia	Belnapia rosea
ruderals	0.043538	7295	1641811	Bacteria	Actinobacteria	Actinobacteria	NA	NA	NA	Actinobacteria bacterium IMCC26207
ruderals	0.043532	7294	360056	Bacteria	Planctomycetes	Planctomycetia	Planctomycetales	Planctomycetaceae	Schlesneria	Schlesneria paludicola
soil	0.04921	7287	639030	Bacteria	Acidobacteria	Acidobacteriia	Acidobacteriales	Acidobacteriaceae	NA	Acidobacteria bacterium KBS 146
tomato	0.050708	7281	1619897	Bacteria	Bacteroidetes	NA	NA	NA	NA	Bacteroidetes bacterium OLB12
tomato	0.043203	7275	1450524	Bacteria	Proteobacteria	Betaproteobacteria	Burkholderiales	Comamonadaceae	Caenimonas	Caenimonas sp. SL110
soil	0.049783	7272	1379270	Bacteria	Gemmatimonadetes	Gemmatimonadetes	Gemmatimonadales	Gemmatimonadaceae	Gemmatimonas	Gemmatimonas phototrophica
soil	0.058537	7272	504800	Bacteria	Actinobacteria	Actinobacteria	Geodermatophilales	Geodermatophilaceae	Geodermatophilus	Geodermatophilus ruber
ruderals	0.046164	7263	649831	Bacteria	Actinobacteria	Actinobacteria	Micromonosporales	Micromonosporaceae	Actinoplanes	Actinoplanes sp. N902-109
ruderals	0.04359	7259	1933817	Bacteria	Actinobacteria	Actinobacteria	Propionibacteriales	Nocardioidaceae	Kribbella	Kribbella sp. ALI-6-A
soil	0.049674	7256	1797479	Bacteria	Proteobacteria	Betaproteobacteria	NA	NA	NA	Betaproteobacteria bacterium RBG_16_66_20
soil	0.054455	7254	1961108	Bacteria	Proteobacteria	Deltaproteobacteria	Myxococcales	Polyangiaceae	NA	Polyangiaceae bacterium UTPRO1
tomato	0.048686	7250	1803507	Bacteria	Proteobacteria	Alphaproteobacteria	NA	NA	NA	Alphaproteobacteria bacterium 13_2_20CM_2_64_7
tomato	0.04912	7250	1855303	Bacteria	Proteobacteria	Gammaproteobacteria	Xanthomonadales	Xanthomonadaceae	Pseudoxanthomonas	Pseudoxanthomonas sp. CF125
ruderals	0.043494	7243	49319	Bacteria	Actinobacteria	Rubrobacteria	Rubrobacterales	Rubrobacteraceae	Rubrobacter	Rubrobacter xylanophilus
tomato	0.052518	7238	1298913	Bacteria	Proteobacteria	Betaproteobacteria	Burkholderiales	Comamonadaceae	NA	Comamonadaceae bacterium URHA0028
ruderals	0.04372	7237	1895832	Bacteria	Actinobacteria	Thermoleophilia	Solirubrobacterales	NA	NA	Solirubrobacterales bacterium 67-14
soil	0.053218	7235	186479	Bacteria	Chloroflexi	NA	NA	NA	Kouleothrix	Kouleothrix aurantiaca
ruderals	0.045967	7232	113571	Bacteria	Actinobacteria	Actinobacteria	Micromonosporales	Micromonosporaceae	Actinoplanes	Actinoplanes rectilineatus
tomato	0.048964	7227	482630	Bacteria	Cyanobacteria	NA	Nostocales	Tolypothrichaceae	Hassallia	Hassallia byssoidea
ruderals	0.045923	7225	360056	Bacteria	Planctomycetes	Planctomycetia	Planctomycetales	Planctomycetaceae	Schlesneria	Schlesneria paludicola
tomato	0.052351	7215	1267535	Bacteria	Acidobacteria	Acidobacteriia	Acidobacteriales	Acidobacteriaceae	NA	Acidobacteriaceae bacterium KBS 96
ruderals	0.045808	7207	1895835	Bacteria	Bacteroidetes	Sphingobacteriia	Sphingobacteriales	NA	NA	Sphingobacteriales bacterium 40-81
soil	0.053005	7206	462367	Bacteria	Bacteroidetes	Chitinophagia	Chitinophagales	Chitinophagaceae	Flavisolibacter	Flavisolibacter ginsengisoli
tomato	0.042728	7195	1380391	Bacteria	Proteobacteria	Alphaproteobacteria	Rhodospirillales	Rhodospirillaceae	Dongia	Dongia sp. URHE0060
ruderals	0.043466	7195	1895690	Bacteria	Acidobacteria	Acidobacteriia	Acidobacteriales	NA	NA	Acidobacteriales bacterium 59-55
ruderals	0.043454	7193	927083	Bacteria	Proteobacteria	Deltaproteobacteria	Myxococcales	Sandaracinaceae	Sandaracinus	Sandaracinus amylolyticus
soil	0.049236	7192	171674	Bacteria	Proteobacteria	Alphaproteobacteria	Rhodospirillales	Rhodospirillaceae	Inquilinus	Inquilinus limosus
soil	0.052258	7192	1187851	Bacteria	Proteobacteria	Alphaproteobacteria	Rhodobacterales	Rhodobacteraceae	Rhodovulum	Rhodovulum sp. PH10
tomato	0.048707	7189	1803475	Bacteria	Actinobacteria	NA	NA	NA	NA	Actinobacteria bacterium 13_1_20CM_3_68_9
tomato	0.052126	7184	722472	Bacteria	Proteobacteria	Alphaproteobacteria	Rhizobiales	Bradyrhizobiaceae	Bradyrhizobium	Bradyrhizobium lablabi
tomato	0.050004	7180	498055	Bacteria	Proteobacteria	Gammaproteobacteria	Xanthomonadales	Xanthomonadaceae	Arenimonas	Arenimonas oryziterrae
tomato	0.04821	7179	1429439	Bacteria	Candidatus Tectomicrobia	NA	NA	NA	Candidatus Entotheonella	Candidatus Entotheonella sp. TSY2
soil	0.057781	7178	1799656	Bacteria	Actinobacteria	Rubrobacteria	Gaiellales	Gaiellaceae	Gaiella	Gaiella sp. SCGC AG-212-M14
tomato	0.042615	7176	394096	Bacteria	Proteobacteria	Deltaproteobacteria	Myxococcales	Archangiaceae	Hyalangium	Hyalangium minutum
soil	0.052777	7175	860235	Bacteria	Actinobacteria	Actinobacteria	Pseudonocardiales	Pseudonocardiaceae	Kibdelosporangium	Kibdelosporangium phytohabitans
ruderals	0.04281	7173	284016	Bacteria	Proteobacteria	Alphaproteobacteria	Caulobacterales	Caulobacteraceae	Phenylobacterium	Phenylobacterium zucineum
tomato	0.042592	7172	1869	Bacteria	Actinobacteria	Actinobacteria	Micromonosporales	Micromonosporaceae	Actinoplanes	Actinoplanes utahensis
tomato	0.048156	7171	1895832	Bacteria	Actinobacteria	Thermoleophilia	Solirubrobacterales	NA	NA	Solirubrobacterales bacterium 67-14
soil	0.053764	7162	1866	Bacteria	Actinobacteria	Actinobacteria	Micromonosporales	Micromonosporaceae	Actinoplanes	Actinoplanes missouriensis
ruderals	0.042726	7159	1123067	Bacteria	Proteobacteria	Alphaproteobacteria	Rhodobacterales	Rhodobacteraceae	Rubellimicrobium	Rubellimicrobium mesophilum
tomato	0.042497	7156	1861	Bacteria	Actinobacteria	Actinobacteria	Geodermatophilales	Geodermatophilaceae	Geodermatophilus	Geodermatophilus obscurus
ruderals	0.042917	7147	1518501	Bacteria	Proteobacteria	Alphaproteobacteria	Rhizobiales	Bradyrhizobiaceae	Bradyrhizobium	Bradyrhizobium valentinum
soil	0.052571	7147	588672	Bacteria	Actinobacteria	Thermoleophilia	Solirubrobacterales	Patulibacteraceae	Patulibacter	Patulibacter americanus
ruderals	0.045414	7145	1803475	Bacteria	Actinobacteria	NA	NA	NA	NA	Actinobacteria bacterium 13_1_20CM_3_68_9
soil	0.053614	7142	1797662	Bacteria	Chloroflexi	NA	NA	NA	NA	Chloroflexi bacterium RBG_16_70_13
ruderals	0.059911	7140	1895839	Bacteria	Bacteroidetes	Sphingobacteriia	Sphingobacteriales	NA	NA	Sphingobacteriales bacterium 46-32
tomato	0.048375	7140	107709	Bacteria	Verrucomicrobia	Opitutae	Opitutales	Opitutaceae	Opitutus	Opitutus terrae
soil	0.05249	7136	1803481	Bacteria	Actinobacteria	NA	NA	NA	NA	Actinobacteria bacterium 13_1_20CM_4_69_9
tomato	0.042348	7131	1349421	Bacteria	Bacteroidetes	Chitinophagia	Chitinophagales	Chitinophagaceae	Flavihumibacter	Flavihumibacter solisilvae
ruderals	0.04799	8041	456999	Eukaryota	Basidiomycota	Agaricomycetes	Cantharellales	Ceratobasidiaceae	Rhizoctonia	Rhizoctonia solani
ruderals	0.042821	7131	1296565	Bacteria	Actinobacteria	Actinobacteria	Geodermatophilales	Geodermatophilaceae	Geodermatophilus	Geodermatophilus amargosae
ruderals	0.042553	7130	1166337	Bacteria	Proteobacteria	Alphaproteobacteria	Sphingomonadales	Sphingomonadaceae	Sphingomonas	Sphingomonas sp. S5-249
soil	0.052438	7129	549386	Bacteria	Proteobacteria	Alphaproteobacteria	Rhizobiales	Methylobacteriaceae	Microvirga	Microvirga guangxiensis
tomato	0.0483	7129	1429916	Bacteria	Proteobacteria	Alphaproteobacteria	Rhizobiales	Bradyrhizobiaceae	Afipia	Afipia sp. P52-10
soil	0.052431	7128	42256	Bacteria	Actinobacteria	Rubrobacteria	Rubrobacterales	Rubrobacteraceae	Rubrobacter	Rubrobacter radiotolerans
ruderals	0.042535	7127	1895835	Bacteria	Bacteroidetes	Sphingobacteriia	Sphingobacteriales	NA	NA	Sphingobacteriales bacterium 40-81
ruderals	0.043049	7126	474950	Bacteria	Acidobacteria	Acidobacteriia	Acidobacteriales	Acidobacteriaceae	Granulicella	Granulicella pectinivorans
soil	0.057354	7125	1379270	Bacteria	Gemmatimonadetes	Gemmatimonadetes	Gemmatimonadales	Gemmatimonadaceae	Gemmatimonas	Gemmatimonas phototrophica
ruderals	0.045268	7122	56438	Bacteria	Actinobacteria	Actinobacteria	Micromonosporales	Micromonosporaceae	Couchioplanes	Couchioplanes caeruleus
ruderals	0.045242	7118	1380356	Bacteria	Actinobacteria	Actinobacteria	Geodermatophilales	Geodermatophilaceae	Blastococcus	Blastococcus sp. URHD0036
tomato	0.042259	7116	1736528	Bacteria	Proteobacteria	Betaproteobacteria	Burkholderiales	NA	Rhizobacter	Rhizobacter sp. Root404
ruderals	0.059701	7115	56438	Bacteria	Actinobacteria	Actinobacteria	Micromonosporales	Micromonosporaceae	Couchioplanes	Couchioplanes caeruleus
soil	0.052313	7112	1805166	Bacteria	Proteobacteria	Gammaproteobacteria	NA	NA	NA	Gammaproteobacteria bacterium 13_2_20CM_66_19
ruderals	0.059668	7111	1632864	Bacteria	Planctomycetes	Planctomycetia	Planctomycetales	Planctomycetaceae	Planctomyces	Planctomyces sp. SH-PL14
soil	0.057201	7106	1805101	Bacteria	Cyanobacteria	NA	NA	NA	NA	Cyanobacteria bacterium 13_1_40CM_2_61_4
ruderals	0.042635	7100	33876	Bacteria	Actinobacteria	Actinobacteria	Micromonosporales	Micromonosporaceae	Catenuloplanes	Catenuloplanes japonicus
ruderals	0.042368	7099	465721	Bacteria	Proteobacteria	Gammaproteobacteria	Nevskiales	Sinobacteraceae	Steroidobacter	Steroidobacter denitrificans
soil	0.057113	7095	1640513	Bacteria	Chloroflexi	NA	NA	NA	NA	Chloroflexi bacterium CSP1-4
ruderals	0.042581	7091	1586287	Bacteria	Actinobacteria	Actinobacteria	Pseudonocardiales	Pseudonocardiaceae	Lentzea	Lentzea guizhouensis
ruderals	0.042563	7088	703222	Bacteria	Actinobacteria	Actinobacteria	Pseudonocardiales	Pseudonocardiaceae	Kibdelosporangium	Kibdelosporangium sp. MJ126-NF4
tomato	0.049322	7082	1380357	Bacteria	Proteobacteria	Alphaproteobacteria	Rhodospirillales	NA	NA	Rhodospirillales bacterium URHD0017
tomato	0.042022	7076	135946	Bacteria	Actinobacteria	Actinobacteria	Micromonosporales	Micromonosporaceae	Actinoplanes	Actinoplanes awajinensis
ruderals	0.042741	7075	80871	Bacteria	Actinobacteria	Actinobacteria	Frankiales	Cryptosporangiaceae	Cryptosporangium	Cryptosporangium arvum
ruderals	0.042711	7070	189753	Bacteria	Proteobacteria	Alphaproteobacteria	Rhizobiales	Bradyrhizobiaceae	Bradyrhizobium	Bradyrhizobium sp. Ec3.3
ruderals	0.042449	7069	1797501	Bacteria	Proteobacteria	Betaproteobacteria	NA	NA	NA	Betaproteobacteria bacterium RIFCSPLOWO2_12_FULL_65_14
soil	0.048394	7069	173480	Bacteria	Gemmatimonadetes	Gemmatimonadetes	Gemmatimonadales	Gemmatimonadaceae	Gemmatimonas	Gemmatimonas aurantiaca
ruderals	0.059307	7068	1866	Bacteria	Actinobacteria	Actinobacteria	Micromonosporales	Micromonosporaceae	Actinoplanes	Actinoplanes missouriensis
soil	0.056839	7061	1797661	Bacteria	Chloroflexi	NA	NA	NA	NA	Chloroflexi bacterium RBG_16_69_14
soil	0.056807	7057	1267535	Bacteria	Acidobacteria	Acidobacteriia	Acidobacteriales	Acidobacteriaceae	NA	Acidobacteriaceae bacterium KBS 96
ruderals	0.042329	7049	1736466	Bacteria	Proteobacteria	Alphaproteobacteria	Rhizobiales	Xanthobacteraceae	Pseudolabrys	Pseudolabrys sp. Root1462
soil	0.05185	7049	1380391	Bacteria	Proteobacteria	Alphaproteobacteria	Rhodospirillales	Rhodospirillaceae	Dongia	Dongia sp. URHE0060
soil	0.051212	7048	33075	Bacteria	Acidobacteria	Acidobacteriia	Acidobacteriales	Acidobacteriaceae	Acidobacterium	Acidobacterium capsulatum
ruderals	0.042058	7047	1736464	Bacteria	Proteobacteria	Betaproteobacteria	Burkholderiales	Comamonadaceae	Pelomonas	Pelomonas sp. Root1444
soil	0.051828	7046	1933779	Bacteria	Actinobacteria	Actinobacteria	Pseudonocardiales	Pseudonocardiaceae	Actinosynnema	Actinosynnema sp. ALI-1.44
soil	0.051197	7046	1895928	Bacteria	Chloroflexi	NA	NA	NA	NA	Chloroflexi bacterium 54-19
ruderals	0.044785	7046	1882682	Bacteria	Proteobacteria	Alphaproteobacteria	Rhizobiales	Methylobacteriaceae	Microvirga	Microvirga ossetica
soil	0.051813	7044	1736365	Bacteria	Proteobacteria	Betaproteobacteria	Burkholderiales	Comamonadaceae	Ramlibacter	Ramlibacter sp. Leaf400
tomato	0.04182	7042	1797561	Bacteria	Proteobacteria	Betaproteobacteria	Burkholderiales	NA	NA	Burkholderiales bacterium RIFCSPHIGHO2_12_FULL_69_20
tomato	0.047704	7041	1892846	Bacteria	Proteobacteria	Alphaproteobacteria	Rhizobiales	Hyphomicrobiaceae	Hyphomicrobium	Hyphomicrobium sp. NDB2Meth4
tomato	0.047684	7038	529705	Bacteria	Proteobacteria	Alphaproteobacteria	Sphingomonadales	Sphingomonadaceae	Sphingomonas	Sphingomonas changbaiensis
tomato	0.047643	7032	83615	Bacteria	Proteobacteria	Gammaproteobacteria	Xanthomonadales	Xanthomonadaceae	Luteimonas	Luteimonas mephitis
tomato	0.047636	7031	134676	Bacteria	Actinobacteria	Actinobacteria	Micromonosporales	Micromonosporaceae	Actinoplanes	Actinoplanes sp. SE50/110
tomato	0.047155	7022	124	Bacteria	Planctomycetes	Planctomycetia	Planctomycetales	Planctomycetaceae	Blastopirellula	Blastopirellula marina
soil	0.052668	7016	135946	Bacteria	Actinobacteria	Actinobacteria	Micromonosporales	Micromonosporaceae	Actinoplanes	Actinoplanes awajinensis
soil	0.047366	7014	1206085	Bacteria	Actinobacteria	Actinobacteria	Frankiales	Frankiaceae	Jatrophihabitans	Jatrophihabitans endophyticus
tomato	0.048834	7012	35752	Bacteria	Actinobacteria	Actinobacteria	Micromonosporales	Micromonosporaceae	Actinoplanes	Actinoplanes philippinensis
ruderals	0.042355	7011	1799658	Bacteria	Planctomycetes	Planctomycetia	Planctomycetales	Planctomycetaceae	NA	Planctomycetaceae bacterium SCGC AG-212-F19
tomato	0.050849	7008	1797661	Bacteria	Chloroflexi	NA	NA	NA	NA	Chloroflexi bacterium RBG_16_69_14
ruderals	0.041825	7008	1632864	Bacteria	Planctomycetes	Planctomycetia	Planctomycetales	Planctomycetaceae	Planctomyces	Planctomyces sp. SH-PL14
ruderals	0.041819	7007	1640513	Bacteria	Chloroflexi	NA	NA	NA	NA	Chloroflexi bacterium CSP1-4
ruderals	0.042324	7006	1660129	Bacteria	Proteobacteria	Alphaproteobacteria	Caulobacterales	Caulobacteraceae	Phenylobacterium	Phenylobacterium sp. SCN 70-31
ruderals	0.058753	7002	1882749	Bacteria	Verrucomicrobia	Opitutae	Opitutales	Opitutaceae	Opitutus	Opitutus sp. GAS368
ruderals	0.041783	7001	1349421	Bacteria	Bacteroidetes	Chitinophagia	Chitinophagales	Chitinophagaceae	Flavihumibacter	Flavihumibacter solisilvae
soil	0.05146	6996	1736272	Bacteria	Proteobacteria	Betaproteobacteria	Burkholderiales	Oxalobacteraceae	Massilia	Massilia sp. Leaf139
soil	0.056284	6992	173480	Bacteria	Gemmatimonadetes	Gemmatimonadetes	Gemmatimonadales	Gemmatimonadaceae	Gemmatimonas	Gemmatimonas aurantiaca
ruderals	0.04198	6991	1574409	Bacteria	Proteobacteria	Alphaproteobacteria	Rhizobiales	Phyllobacteriaceae	Mesorhizobium	Mesorhizobium sp. F7
ruderals	0.041724	6991	1298913	Bacteria	Proteobacteria	Betaproteobacteria	Burkholderiales	Comamonadaceae	NA	Comamonadaceae bacterium URHA0028
soil	0.050711	6979	1387353	Bacteria	Planctomycetes	Planctomycetia	Planctomycetales	Isosphaeraceae	Paludisphaera	Paludisphaera borealis
ruderals	0.044353	6978	1736431	Bacteria	Actinobacteria	Actinobacteria	Propionibacteriales	Nocardioidaceae	Nocardioides	Nocardioides sp. Root122
ruderals	0.044308	6971	1938607	Bacteria	Proteobacteria	Alphaproteobacteria	Sphingomonadales	Sphingomonadaceae	Sphingomonas	Sphingomonas sp. LM7
tomato	0.046773	6965	1805166	Bacteria	Proteobacteria	Gammaproteobacteria	NA	NA	NA	Gammaproteobacteria bacterium 13_2_20CM_66_19
tomato	0.046773	6965	2074	Bacteria	Actinobacteria	Actinobacteria	Pseudonocardiales	Pseudonocardiaceae	Pseudonocardia	Pseudonocardia autotrophica
ruderals	0.044238	6960	1660129	Bacteria	Proteobacteria	Alphaproteobacteria	Caulobacterales	Caulobacteraceae	Phenylobacterium	Phenylobacterium sp. SCN 70-31
ruderals	0.041782	6958	134676	Bacteria	Actinobacteria	Actinobacteria	Micromonosporales	Micromonosporaceae	Actinoplanes	Actinoplanes sp. SE50/110
soil	0.047613	6955	1650658	Bacteria	Actinobacteria	Actinobacteria	NA	NA	NA	Actinobacteria bacterium IMCC26256
ruderals	0.042016	6955	394096	Bacteria	Proteobacteria	Deltaproteobacteria	Myxococcales	Archangiaceae	Hyalangium	Hyalangium minutum
ruderals	0.041491	6952	397278	Bacteria	Actinobacteria	Actinobacteria	Propionibacteriales	Nocardioidaceae	Marmoricola	Marmoricola aequoreus
soil	0.047593	6952	1298913	Bacteria	Proteobacteria	Betaproteobacteria	Burkholderiales	Comamonadaceae	NA	Comamonadaceae bacterium URHA0028
ruderals	0.041467	6948	1429916	Bacteria	Proteobacteria	Alphaproteobacteria	Rhizobiales	Bradyrhizobiaceae	Afipia	Afipia sp. P52-10
tomato	0.046658	6948	1895756	Bacteria	Bacteroidetes	Cytophagia	Cytophagales	Cytophagaceae	Dyadobacter	Dyadobacter sp. 50-39
tomato	0.048382	6947	1797501	Bacteria	Proteobacteria	Betaproteobacteria	NA	NA	NA	Betaproteobacteria bacterium RIFCSPLOWO2_12_FULL_65_14
tomato	0.048284	6933	1736549	Bacteria	Proteobacteria	Gammaproteobacteria	Xanthomonadales	Xanthomonadaceae	Lysobacter	Lysobacter sp. Root494
soil	0.055776	6929	171674	Bacteria	Proteobacteria	Alphaproteobacteria	Rhodospirillales	Rhodospirillaceae	Inquilinus	Inquilinus limosus
ruderals	0.043952	6915	946333	Bacteria	Proteobacteria	Betaproteobacteria	Burkholderiales	NA	Rhizobacter	Rhizobacter gummiphilus
tomato	0.046823	6911	215690	Bacteria	Proteobacteria	Gammaproteobacteria	Xanthomonadales	Xanthomonadaceae	Thermomonas	Thermomonas fusca
tomato	0.046803	6908	398037	Bacteria	Bacteroidetes	Chitinophagia	Chitinophagales	Chitinophagaceae	Segetibacter	Segetibacter koreensis
soil	0.047285	6907	1380353	Bacteria	Actinobacteria	Actinobacteria	Geodermatophilales	Geodermatophilaceae	NA	Geodermatophilaceae bacterium URHB0062
tomato	0.046796	6907	2074	Bacteria	Actinobacteria	Actinobacteria	Pseudonocardiales	Pseudonocardiaceae	Pseudonocardia	Pseudonocardia autotrophica
tomato	0.046363	6904	48467	Bacteria	Verrucomicrobia	Verrucomicrobiae	Verrucomicrobiales	Verrucomicrobiaceae	Prosthecobacter	Prosthecobacter debontii
tomato	0.048075	6903	1235591	Bacteria	Proteobacteria	Alphaproteobacteria	Rhizobiales	NA	Pseudorhodoplanes	Pseudorhodoplanes sinuspersici
tomato	0.040982	6901	1267535	Bacteria	Acidobacteria	Acidobacteriia	Acidobacteriales	Acidobacteriaceae	NA	Acidobacteriaceae bacterium KBS 96
soil	0.051768	6896	1710355	Bacteria	Actinobacteria	Actinobacteria	Micromonosporales	Micromonosporaceae	Actinoplanes	Actinoplanes sp. TFC3
soil	0.046562	6895	35754	Bacteria	Actinobacteria	Actinobacteria	Micromonosporales	Micromonosporaceae	Dactylosporangium	Dactylosporangium aurantiacum
tomato	0.046708	6894	225324	Bacteria	Proteobacteria	Alphaproteobacteria	Rhodospirillales	NA	Enhydrobacter	Enhydrobacter aerosaccus
ruderals	0.041374	6890	1803481	Bacteria	Actinobacteria	NA	NA	NA	NA	Actinobacteria bacterium 13_1_20CM_4_69_9
ruderals	0.043781	6888	1892846	Bacteria	Proteobacteria	Alphaproteobacteria	Rhizobiales	Hyphomicrobiaceae	Hyphomicrobium	Hyphomicrobium sp. NDB2Meth4
soil	0.050658	6887	1703345	Bacteria	Bacteroidetes	Chitinophagia	Chitinophagales	Chitinophagaceae	Niastella	Niastella vici
tomato	0.046188	6878	1097667	Bacteria	Actinobacteria	Thermoleophilia	Solirubrobacterales	Patulibacteraceae	Patulibacter	Patulibacter medicamentivorans
tomato	0.040822	6874	35754	Bacteria	Actinobacteria	Actinobacteria	Micromonosporales	Micromonosporaceae	Dactylosporangium	Dactylosporangium aurantiacum
tomato	0.046155	6873	1235591	Bacteria	Proteobacteria	Alphaproteobacteria	Rhizobiales	NA	Pseudorhodoplanes	Pseudorhodoplanes sinuspersici
soil	0.0464	6871	1895711	Bacteria	Proteobacteria	Alphaproteobacteria	NA	NA	NA	Alphaproteobacteria bacterium 65-37
ruderals	0.05762	6867	186479	Bacteria	Chloroflexi	NA	NA	NA	Kouleothrix	Kouleothrix aurantiaca
tomato	0.047811	6865	1866	Bacteria	Actinobacteria	Actinobacteria	Micromonosporales	Micromonosporaceae	Actinoplanes	Actinoplanes missouriensis
tomato	0.046101	6865	1798228	Bacteria	Actinobacteria	Actinobacteria	Geodermatophilales	Geodermatophilaceae	Blastococcus	Blastococcus sp. DSM 46838
soil	0.046984	6863	1803475	Bacteria	Actinobacteria	NA	NA	NA	NA	Actinobacteria bacterium 13_1_20CM_3_68_9
ruderals	0.041194	6860	1895714	Bacteria	Proteobacteria	Alphaproteobacteria	Sphingomonadales	Erythrobacteraceae	Altererythrobacter	Altererythrobacter sp. 66-12
ruderals	0.041164	6855	1500261	Bacteria	Proteobacteria	Betaproteobacteria	Burkholderiales	NA	Methylibium	Methylibium sp. CF059
soil	0.046929	6855	1736365	Bacteria	Proteobacteria	Betaproteobacteria	Burkholderiales	Comamonadaceae	Ramlibacter	Ramlibacter sp. Leaf400
tomato	0.047692	6848	477680	Bacteria	Bacteroidetes	Chitinophagia	Chitinophagales	Chitinophagaceae	Filimonas	Filimonas lacunae
ruderals	0.041104	6845	217168	Bacteria	Proteobacteria	Alphaproteobacteria	Rhizobiales	Methylobacteriaceae	Microvirga	Microvirga flocculans
tomato	0.049659	6844	1882749	Bacteria	Verrucomicrobia	Opitutae	Opitutales	Opitutaceae	Opitutus	Opitutus sp. GAS368
tomato	0.046342	6840	1869	Bacteria	Actinobacteria	Actinobacteria	Micromonosporales	Micromonosporaceae	Actinoplanes	Actinoplanes utahensis
soil	0.050283	6836	171674	Bacteria	Proteobacteria	Alphaproteobacteria	Rhodospirillales	Rhodospirillaceae	Inquilinus	Inquilinus limosus
ruderals	0.040799	6836	1797661	Bacteria	Chloroflexi	NA	NA	NA	NA	Chloroflexi bacterium RBG_16_69_14
soil	0.05502	6835	1380347	Bacteria	Actinobacteria	Actinobacteria	Geodermatophilales	Geodermatophilaceae	NA	Geodermatophilaceae bacterium URHB0048
soil	0.046737	6827	864069	Bacteria	Proteobacteria	Alphaproteobacteria	Rhizobiales	Methylobacteriaceae	Microvirga	Microvirga lotononidis
tomato	0.046213	6821	114	Bacteria	Planctomycetes	Planctomycetia	Planctomycetales	Gemmataceae	Gemmata	Gemmata obscuriglobus
tomato	0.045765	6815	354356	Bacteria	Bacteroidetes	Chitinophagia	Chitinophagales	Chitinophagaceae	Niastella	Niastella koreensis
soil	0.054835	6812	1805366	Bacteria	Candidatus Rokubacteria	NA	NA	NA	NA	Candidatus Rokubacteria bacterium 13_1_40CM_68_15
tomato	0.046146	6811	171674	Bacteria	Proteobacteria	Alphaproteobacteria	Rhodospirillales	Rhodospirillaceae	Inquilinus	Inquilinus limosus
ruderals	0.040821	6798	1895841	Bacteria	Bacteroidetes	Sphingobacteriia	Sphingobacteriales	NA	NA	Sphingobacteriales bacterium 50-39
soil	0.045867	6792	1518501	Bacteria	Proteobacteria	Alphaproteobacteria	Rhizobiales	Bradyrhizobiaceae	Bradyrhizobium	Bradyrhizobium valentinum
tomato	0.040317	6789	482630	Bacteria	Cyanobacteria	NA	Nostocales	Tolypothrichaceae	Hassallia	Hassallia byssoidea
ruderals	0.0405	6786	34073	Bacteria	Proteobacteria	Betaproteobacteria	Burkholderiales	Comamonadaceae	Variovorax	Variovorax paradoxus
soil	0.04645	6785	1736466	Bacteria	Proteobacteria	Alphaproteobacteria	Rhizobiales	Xanthobacteraceae	Pseudolabrys	Pseudolabrys sp. Root1462
ruderals	0.040731	6783	1912961	Bacteria	Actinobacteria	Actinobacteria	Pseudonocardiales	Pseudonocardiaceae	Actinophytocola	Actinophytocola xanthii
ruderals	0.056882	6779	402650	Bacteria	Actinobacteria	Actinobacteria	Pseudonocardiales	Pseudonocardiaceae	Actinomycetospora	Actinomycetospora chiangmaiensis
soil	0.054529	6774	588672	Bacteria	Actinobacteria	Thermoleophilia	Solirubrobacterales	Patulibacteraceae	Patulibacter	Patulibacter americanus
ruderals	0.040641	6768	1267535	Bacteria	Acidobacteria	Acidobacteriia	Acidobacteriales	Acidobacteriaceae	NA	Acidobacteriaceae bacterium KBS 96
tomato	0.040163	6763	420324	Bacteria	Proteobacteria	Alphaproteobacteria	Rhizobiales	Methylobacteriaceae	Microvirga	Microvirga lupini
ruderals	0.056739	6762	1759059	Bacteria	Proteobacteria	Alphaproteobacteria	Caulobacterales	Caulobacteraceae	NA	Caulobacteraceae bacterium OTSz_A_272
ruderals	0.040357	6762	33876	Bacteria	Actinobacteria	Actinobacteria	Micromonosporales	Micromonosporaceae	Catenuloplanes	Catenuloplanes japonicus
tomato	0.047086	6761	1805166	Bacteria	Proteobacteria	Gammaproteobacteria	NA	NA	NA	Gammaproteobacteria bacterium 13_2_20CM_66_19
tomato	0.045807	6761	1736433	Bacteria	Proteobacteria	Betaproteobacteria	Burkholderiales	NA	Rhizobacter	Rhizobacter sp. Root1221
tomato	0.040145	6760	391953	Bacteria	Proteobacteria	Betaproteobacteria	Burkholderiales	NA	Aquincola	Aquincola tertiaricarbonis
soil	0.045651	6760	1797225	Bacteria	Proteobacteria	Alphaproteobacteria	NA	NA	NA	Alphaproteobacteria bacterium RIFCSPHIGHO2_12_FULL_66_14
soil	0.045644	6759	466153	Bacteria	Planctomycetes	Planctomycetia	Planctomycetales	Isosphaeraceae	Singulisphaera	Singulisphaera acidiphila
tomato	0.049006	6754	114	Bacteria	Planctomycetes	Planctomycetia	Planctomycetales	Gemmataceae	Gemmata	Gemmata obscuriglobus
ruderals	0.040285	6750	1736433	Bacteria	Proteobacteria	Betaproteobacteria	Burkholderiales	NA	Rhizobacter	Rhizobacter sp. Root1221
ruderals	0.040256	6745	864051	Bacteria	Proteobacteria	Betaproteobacteria	Burkholderiales	NA	NA	Burkholderiales bacterium JOSHI_001
ruderals	0.040244	6743	482630	Bacteria	Cyanobacteria	NA	Nostocales	Tolypothrichaceae	Hassallia	Hassallia byssoidea
ruderals	0.040244	6743	1736379	Bacteria	Actinobacteria	Actinobacteria	Propionibacteriales	Nocardioidaceae	Marmoricola	Marmoricola sp. Leaf446
soil	0.045536	6743	1797482	Bacteria	Proteobacteria	Betaproteobacteria	NA	NA	NA	Betaproteobacteria bacterium RIFCSPLOWO2_02_64_14
ruderals	0.040401	6728	29448	Bacteria	Proteobacteria	Alphaproteobacteria	Rhizobiales	Bradyrhizobiaceae	Bradyrhizobium	Bradyrhizobium elkanii
soil	0.04888	6727	54	Bacteria	Proteobacteria	Deltaproteobacteria	Myxococcales	Nannocystaceae	Nannocystis	Nannocystis exedens
soil	0.054102	6721	927083	Bacteria	Proteobacteria	Deltaproteobacteria	Myxococcales	Sandaracinaceae	Sandaracinus	Sandaracinus amylolyticus
soil	0.045381	6720	354356	Bacteria	Bacteroidetes	Chitinophagia	Chitinophagales	Chitinophagaceae	Niastella	Niastella koreensis
soil	0.050439	6719	107709	Bacteria	Verrucomicrobia	Opitutae	Opitutales	Opitutaceae	Opitutus	Opitutus terrae
ruderals	0.05637	6718	53461	Bacteria	Actinobacteria	Actinobacteria	Nakamurellales	Nakamurellaceae	Nakamurella	Nakamurella multipartita
tomato	0.048716	6714	1803447	Bacteria	Acidobacteria	NA	NA	NA	NA	Acidobacteria bacterium 13_1_40CM_3_55_6
ruderals	0.040311	6713	134849	Bacteria	Actinobacteria	Actinobacteria	Frankiales	Cryptosporangiaceae	Cryptosporangium	Cryptosporangium aurantiacum
soil	0.045936	6710	1970199	Bacteria	Proteobacteria	Deltaproteobacteria	Myxococcales	NA	NA	Sorangiineae bacterium NIC37A_2
ruderals	0.056227	6701	360056	Bacteria	Planctomycetes	Planctomycetia	Planctomycetales	Planctomycetaceae	Schlesneria	Schlesneria paludicola
tomato	0.048607	6699	1487953	Bacteria	Cyanobacteria	NA	Synechococcales	Leptolyngbyaceae	Leptolyngbya	Leptolyngbya sp. JSC-1
ruderals	0.040203	6695	1895814	Bacteria	Proteobacteria	Alphaproteobacteria	Rhizobiales	NA	NA	Rhizobiales bacterium 64-17
ruderals	0.042547	6694	407022	Bacteria	Bacteroidetes	Sphingobacteriia	Sphingobacteriales	Sphingobacteriaceae	Pseudosphingobacterium	Pseudosphingobacterium domesticum
ruderals	0.039909	6687	51	Bacteria	Proteobacteria	Deltaproteobacteria	Myxococcales	Polyangiaceae	Chondromyces	Chondromyces apiculatus
tomato	0.044879	6683	1380347	Bacteria	Actinobacteria	Actinobacteria	Geodermatophilales	Geodermatophilaceae	NA	Geodermatophilaceae bacterium URHB0048
tomato	0.045211	6673	1660129	Bacteria	Proteobacteria	Alphaproteobacteria	Caulobacterales	Caulobacteraceae	Phenylobacterium	Phenylobacterium sp. SCN 70-31
tomato	0.048411	6672	1617415	Bacteria	Chloroflexi	NA	NA	NA	NA	Chloroflexi bacterium OLB14
tomato	0.044758	6665	504800	Bacteria	Actinobacteria	Actinobacteria	Geodermatophilales	Geodermatophilaceae	Geodermatophilus	Geodermatophilus ruber
tomato	0.044744	6663	1353260	Archaea	Thaumarchaeota	Nitrososphaeria	Nitrososphaerales	Nitrososphaeraceae	Candidatus Nitrosocosmicus	Candidatus Nitrocosmicus oleophilus
soil	0.048415	6663	1895825	Bacteria	Proteobacteria	Alphaproteobacteria	Rhodospirillales	NA	NA	Rhodospirillales bacterium 69-11
tomato	0.048324	6660	354356	Bacteria	Bacteroidetes	Chitinophagia	Chitinophagales	Chitinophagaceae	Niastella	Niastella koreensis
tomato	0.044711	6658	543632	Bacteria	Actinobacteria	Actinobacteria	Micromonosporales	Micromonosporaceae	Actinoplanes	Actinoplanes subtropicus
soil	0.048937	6653	1298863	Bacteria	Actinobacteria	Actinobacteria	Propionibacteriales	Nocardioidaceae	Marmoricola	Marmoricola sp. URHB0036
tomato	0.039492	6650	71191	Bacteria	Cyanobacteria	NA	Oscillatoriales	Oscillatoriaceae	Phormidium	Phormidium ambiguum
ruderals	0.039903	6645	1032527	Bacteria	Verrucomicrobia	Verrucomicrobiae	Verrucomicrobiales	Verrucomicrobia subdivision 3	Pedosphaera	Pedosphaera parvula
ruderals	0.039659	6645	394096	Bacteria	Proteobacteria	Deltaproteobacteria	Myxococcales	Archangiaceae	Hyalangium	Hyalangium minutum
tomato	0.039444	6642	1805166	Bacteria	Proteobacteria	Gammaproteobacteria	NA	NA	NA	Gammaproteobacteria bacterium 13_2_20CM_66_19
soil	0.045436	6637	35751	Bacteria	Actinobacteria	Actinobacteria	Frankiales	Sporichthyaceae	Sporichthya	Sporichthya polymorpha
tomato	0.046216	6636	284016	Bacteria	Proteobacteria	Alphaproteobacteria	Caulobacterales	Caulobacteraceae	Phenylobacterium	Phenylobacterium zucineum
soil	0.045409	6633	658062	Bacteria	Acidobacteria	Acidobacteriia	Acidobacteriales	Acidobacteriaceae	Candidatus Koribacter	Candidatus Koribacter versatilis
soil	0.049786	6632	54	Bacteria	Proteobacteria	Deltaproteobacteria	Myxococcales	Nannocystaceae	Nannocystis	Nannocystis exedens
tomato	0.039385	6632	360054	Bacteria	Acidobacteria	Solibacteres	Solibacterales	Bryobacteraceae	Bryobacter	Bryobacter aggregatus
tomato	0.044926	6631	1632864	Bacteria	Planctomycetes	Planctomycetia	Planctomycetales	Planctomycetaceae	Planctomyces	Planctomyces sp. SH-PL14
ruderals	0.042115	6626	1396141	Bacteria	Verrucomicrobia	Verrucomicrobiae	Verrucomicrobiales	Verrucomicrobiaceae	Haloferula	Haloferula sp. BvORR071
soil	0.04532	6620	1895838	Bacteria	Bacteroidetes	Sphingobacteriia	Sphingobacteriales	NA	NA	Sphingobacteriales bacterium 44-61
soil	0.048029	6610	29448	Bacteria	Proteobacteria	Alphaproteobacteria	Rhizobiales	Bradyrhizobiaceae	Bradyrhizobium	Bradyrhizobium elkanii
tomato	0.044763	6607	113562	Bacteria	Actinobacteria	Actinobacteria	Micromonosporales	Micromonosporaceae	Actinoplanes	Actinoplanes derwentensis
ruderals	0.039426	6606	48292	Bacteria	Proteobacteria	Alphaproteobacteria	Rhizobiales	Hyphomicrobiaceae	Hyphomicrobium	Hyphomicrobium zavarzinii
ruderals	0.041982	6605	454194	Bacteria	Acidobacteria	Blastocatellia	NA	NA	Pyrinomonas	Pyrinomonas methylaliphatogenes
ruderals	0.039414	6604	1961100	Bacteria	Chloroflexi	Anaerolineae	NA	NA	NA	Anaerolineae bacterium UTCFX1
soil	0.048569	6603	33	Bacteria	Proteobacteria	Deltaproteobacteria	Myxococcales	Myxococcaceae	Myxococcus	Myxococcus fulvus
ruderals	0.039366	6596	1803462	Bacteria	Acidobacteria	NA	NA	NA	NA	Acidobacteria bacterium 13_2_20CM_2_66_4
tomato	0.039141	6591	529823	Bacteria	Proteobacteria	Gammaproteobacteria	Cellvibrionales	Cellvibrionaceae	Cellvibrio	Cellvibrio sp. OA-2007
tomato	0.047794	6587	70799	Bacteria	Cyanobacteria	NA	Nostocales	Aphanizomenonaceae	Nodularia	Nodularia spumigena
tomato	0.039106	6585	1803462	Bacteria	Acidobacteria	NA	NA	NA	NA	Acidobacteria bacterium 13_2_20CM_2_66_4
ruderals	0.039277	6581	927083	Bacteria	Proteobacteria	Deltaproteobacteria	Myxococcales	Sandaracinaceae	Sandaracinus	Sandaracinus amylolyticus
tomato	0.045826	6580	35754	Bacteria	Actinobacteria	Actinobacteria	Micromonosporales	Micromonosporaceae	Dactylosporangium	Dactylosporangium aurantiacum
tomato	0.03904	6574	54	Bacteria	Proteobacteria	Deltaproteobacteria	Myxococcales	Nannocystaceae	Nannocystis	Nannocystis exedens
tomato	0.045756	6570	1892846	Bacteria	Proteobacteria	Alphaproteobacteria	Rhizobiales	Hyphomicrobiaceae	Hyphomicrobium	Hyphomicrobium sp. NDB2Meth4
ruderals	0.039326	6549	1380388	Bacteria	Actinobacteria	Actinobacteria	Propionibacteriales	Nocardioidaceae	Nocardioides	Nocardioides sp. URHA0032
tomato	0.045596	6547	34073	Bacteria	Proteobacteria	Betaproteobacteria	Burkholderiales	Comamonadaceae	Variovorax	Variovorax paradoxus
tomato	0.044357	6547	1904967	Bacteria	Actinobacteria	Actinobacteria	Pseudonocardiales	Pseudonocardiaceae	Pseudonocardia	Pseudonocardia sp. CNS-004
soil	0.044206	6546	255045	Bacteria	Proteobacteria	Alphaproteobacteria	Rhizobiales	Bradyrhizobiaceae	Bradyrhizobium	Bradyrhizobium canariense
soil	0.052685	6545	1632864	Bacteria	Planctomycetes	Planctomycetia	Planctomycetales	Planctomycetaceae	Planctomyces	Planctomyces sp. SH-PL14
soil	0.044765	6539	462367	Bacteria	Bacteroidetes	Chitinophagia	Chitinophagales	Chitinophagaceae	Flavisolibacter	Flavisolibacter ginsengisoli
ruderals	0.039473	6534	107709	Bacteria	Verrucomicrobia	Opitutae	Opitutales	Opitutaceae	Opitutus	Opitutus terrae
ruderals	0.041505	6530	124	Bacteria	Planctomycetes	Planctomycetia	Planctomycetales	Planctomycetaceae	Blastopirellula	Blastopirellula marina
ruderals	0.039443	6529	864069	Bacteria	Proteobacteria	Alphaproteobacteria	Rhizobiales	Methylobacteriaceae	Microvirga	Microvirga lotononidis
ruderals	0.054717	6521	1892846	Bacteria	Proteobacteria	Alphaproteobacteria	Rhizobiales	Hyphomicrobiaceae	Hyphomicrobium	Hyphomicrobium sp. NDB2Meth4
tomato	0.043771	6518	420324	Bacteria	Proteobacteria	Alphaproteobacteria	Rhizobiales	Methylobacteriaceae	Microvirga	Microvirga lupini
soil	0.043983	6513	570835	Bacteria	Acidobacteria	Acidobacteriia	Acidobacteriales	Acidobacteriaceae	Edaphobacter	Edaphobacter aggregans
tomato	0.045345	6511	68170	Bacteria	Actinobacteria	Actinobacteria	Pseudonocardiales	Pseudonocardiaceae	Lechevalieria	Lechevalieria aerocolonigenes
tomato	0.044113	6511	1895714	Bacteria	Proteobacteria	Alphaproteobacteria	Sphingomonadales	Erythrobacteraceae	Altererythrobacter	Altererythrobacter sp. 66-12
ruderals	0.039316	6508	288000	Bacteria	Proteobacteria	Alphaproteobacteria	Rhizobiales	Bradyrhizobiaceae	Bradyrhizobium	Bradyrhizobium sp. BTAi1
tomato	0.044072	6505	722472	Bacteria	Proteobacteria	Alphaproteobacteria	Rhizobiales	Bradyrhizobiaceae	Bradyrhizobium	Bradyrhizobium lablabi
ruderals	0.041333	6503	1869	Bacteria	Actinobacteria	Actinobacteria	Micromonosporales	Micromonosporaceae	Actinoplanes	Actinoplanes utahensis
ruderals	0.041327	6502	1500261	Bacteria	Proteobacteria	Betaproteobacteria	Burkholderiales	NA	Methylibium	Methylibium sp. CF059
ruderals	0.039262	6499	1382359	Bacteria	Acidobacteria	Acidobacteriia	Acidobacteriales	Acidobacteriaceae	Acidobacterium	Acidobacterium ailaaui
soil	0.052307	6498	1380394	Bacteria	Proteobacteria	Alphaproteobacteria	Rhodospirillales	NA	NA	Rhodospirillales bacterium URHD0088
soil	0.047172	6492	1379270	Bacteria	Gemmatimonadetes	Gemmatimonadetes	Gemmatimonadales	Gemmatimonadaceae	Gemmatimonas	Gemmatimonas phototrophica
tomato	0.047069	6487	1686064	Bacteria	Proteobacteria	Betaproteobacteria	Burkholderiales	NA	Methylibium	Methylibium sp. NZG
soil	0.043767	6481	1641811	Bacteria	Actinobacteria	Actinobacteria	NA	NA	NA	Actinobacteria bacterium IMCC26207
ruderals	0.039147	6480	1387353	Bacteria	Planctomycetes	Planctomycetia	Planctomycetales	Isosphaeraceae	Paludisphaera	Paludisphaera borealis
soil	0.052162	6480	1411123	Bacteria	Proteobacteria	Alphaproteobacteria	Rhizobiales	NA	NA	Rhizobiales bacterium YIM 77505
soil	0.044327	6475	1895814	Bacteria	Proteobacteria	Alphaproteobacteria	Rhizobiales	NA	NA	Rhizobiales bacterium 64-17
soil	0.047048	6475	392734	Bacteria	Acidobacteria	Acidobacteriia	Acidobacteriales	Acidobacteriaceae	Terriglobus	Terriglobus roseus
tomato	0.038423	6470	354356	Bacteria	Bacteroidetes	Chitinophagia	Chitinophagales	Chitinophagaceae	Niastella	Niastella koreensis
tomato	0.046916	6466	54	Bacteria	Proteobacteria	Deltaproteobacteria	Myxococcales	Nannocystaceae	Nannocystis	Nannocystis exedens
ruderals	0.038567	6462	360054	Bacteria	Acidobacteria	Solibacteres	Solibacterales	Bryobacteraceae	Bryobacter	Bryobacter aggregatus
soil	0.044184	6454	124	Bacteria	Planctomycetes	Planctomycetia	Planctomycetales	Planctomycetaceae	Blastopirellula	Blastopirellula marina
ruderals	0.038744	6452	927083	Bacteria	Proteobacteria	Deltaproteobacteria	Myxococcales	Sandaracinaceae	Sandaracinus	Sandaracinus amylolyticus
ruderals	0.041009	6452	113562	Bacteria	Actinobacteria	Actinobacteria	Micromonosporales	Micromonosporaceae	Actinoplanes	Actinoplanes derwentensis
soil	0.043557	6450	1803466	Bacteria	Acidobacteria	NA	NA	NA	NA	Acidobacteria bacterium 13_2_20CM_58_27
tomato	0.046771	6446	1450524	Bacteria	Proteobacteria	Betaproteobacteria	Burkholderiales	Comamonadaceae	Caenimonas	Caenimonas sp. SL110
tomato	0.043281	6445	1797663	Bacteria	Chloroflexi	NA	NA	NA	NA	Chloroflexi bacterium RBG_16_72_14
tomato	0.044844	6439	1882825	Bacteria	Proteobacteria	Betaproteobacteria	Burkholderiales	Comamonadaceae	Variovorax	Variovorax sp. OV329
ruderals	0.038899	6439	218821	Bacteria	Actinobacteria	Actinobacteria	Pseudonocardiales	Pseudonocardiaceae	Amycolatopsis	Amycolatopsis pretoriensis
tomato	0.044816	6435	946333	Bacteria	Proteobacteria	Betaproteobacteria	Burkholderiales	NA	Rhizobacter	Rhizobacter gummiphilus
tomato	0.043544	6427	1736528	Bacteria	Proteobacteria	Betaproteobacteria	Burkholderiales	NA	Rhizobacter	Rhizobacter sp. Root404
tomato	0.043354	5975	38833	Eukaryota	Chlorophyta	Mamiellophyceae	Mamiellales	Mamiellaceae	Micromonas	Micromonas pusilla
soil	0.043402	6427	1379270	Bacteria	Gemmatimonadetes	Gemmatimonadetes	Gemmatimonadales	Gemmatimonadaceae	Gemmatimonas	Gemmatimonas phototrophica
ruderals	0.03834	6424	1759059	Bacteria	Proteobacteria	Alphaproteobacteria	Caulobacterales	Caulobacteraceae	NA	Caulobacteraceae bacterium OTSz_A_272
ruderals	0.038809	6424	649831	Bacteria	Actinobacteria	Actinobacteria	Micromonosporales	Micromonosporaceae	Actinoplanes	Actinoplanes sp. N902-109
tomato	0.044698	6418	1380391	Bacteria	Proteobacteria	Alphaproteobacteria	Rhodospirillales	Rhodospirillaceae	Dongia	Dongia sp. URHE0060
tomato	0.044698	6418	913326	Bacteria	Proteobacteria	Alphaproteobacteria	Rhodospirillales	Rhodospirillaceae	Skermanella	Skermanella stibiiresistens
tomato	0.04323	5958	588596	Eukaryota	Mucoromycota	Glomeromycetes	Glomerales	Glomeraceae	Rhizophagus	Rhizophagus irregularis
tomato	0.043072	6414	1895839	Bacteria	Bacteroidetes	Sphingobacteriia	Sphingobacteriales	NA	NA	Sphingobacteriales bacterium 46-32
tomato	0.043066	6413	1839755	Bacteria	Bacteroidetes	Cytophagia	Cytophagales	Cytophagaceae	Emticicia	Emticicia sp. MM
tomato	0.043442	6412	1912961	Bacteria	Actinobacteria	Actinobacteria	Pseudonocardiales	Pseudonocardiaceae	Actinophytocola	Actinophytocola xanthii
soil	0.048112	6409	1267535	Bacteria	Acidobacteria	Acidobacteriia	Acidobacteriales	Acidobacteriaceae	NA	Acidobacteriaceae bacterium KBS 96
ruderals	0.03848	6408	360054	Bacteria	Acidobacteria	Solibacteres	Solibacterales	Bryobacteraceae	Bryobacter	Bryobacter aggregatus
ruderals	0.038208	6402	54	Bacteria	Proteobacteria	Deltaproteobacteria	Myxococcales	Nannocystaceae	Nannocystis	Nannocystis exedens
ruderals	0.040679	6400	1449076	Bacteria	Proteobacteria	Alphaproteobacteria	Sphingomonadales	Sphingomonadaceae	Sphingomonas	Sphingomonas sp. UNC305MFCol5.2
ruderals	0.038179	6397	1955620	Bacteria	Bacteroidetes	Cytophagia	Cytophagales	Hymenobacteraceae	Hymenobacter	Hymenobacter sp. CRA2
tomato	0.04453	6394	1450524	Bacteria	Proteobacteria	Betaproteobacteria	Burkholderiales	Comamonadaceae	Caenimonas	Caenimonas sp. SL110
soil	0.047992	6393	1619897	Bacteria	Bacteroidetes	NA	NA	NA	NA	Bacteroidetes bacterium OLB12
soil	0.051438	6390	360056	Bacteria	Planctomycetes	Planctomycetia	Planctomycetales	Planctomycetaceae	Schlesneria	Schlesneria paludicola
ruderals	0.038131	6389	1267535	Bacteria	Acidobacteria	Acidobacteriia	Acidobacteriales	Acidobacteriaceae	NA	Acidobacteriaceae bacterium KBS 96
ruderals	0.053601	6388	1660163	Bacteria	Gemmatimonadetes	NA	NA	NA	NA	Gemmatimonadetes bacterium SCN 70-22
ruderals	0.038591	6388	35752	Bacteria	Actinobacteria	Actinobacteria	Micromonosporales	Micromonosporaceae	Actinoplanes	Actinoplanes philippinensis
ruderals	0.038579	6386	1492898	Bacteria	Bacteroidetes	Chitinophagia	Chitinophagales	Chitinophagaceae	Flavisolibacter	Flavisolibacter sp. LCS9
soil	0.047909	6382	1097667	Bacteria	Actinobacteria	Thermoleophilia	Solirubrobacterales	Patulibacteraceae	Patulibacter	Patulibacter medicamentivorans
soil	0.046373	6382	1803492	Bacteria	Actinobacteria	NA	NA	NA	NA	Actinobacteria bacterium 13_2_20CM_2_66_6
soil	0.046929	6380	1797663	Bacteria	Chloroflexi	NA	NA	NA	NA	Chloroflexi bacterium RBG_16_72_14
tomato	0.046278	6378	134676	Bacteria	Actinobacteria	Actinobacteria	Micromonosporales	Micromonosporaceae	Actinoplanes	Actinoplanes sp. SE50/110
soil	0.051341	6378	124	Bacteria	Planctomycetes	Planctomycetia	Planctomycetales	Planctomycetaceae	Blastopirellula	Blastopirellula marina
tomato	0.042817	6376	49319	Bacteria	Actinobacteria	Rubrobacteria	Rubrobacterales	Rubrobacteraceae	Rubrobacter	Rubrobacter xylanophilus
tomato	0.046256	6375	1235591	Bacteria	Proteobacteria	Alphaproteobacteria	Rhizobiales	NA	Pseudorhodoplanes	Pseudorhodoplanes sinuspersici
tomato	0.046249	6374	1518501	Bacteria	Proteobacteria	Alphaproteobacteria	Rhizobiales	Bradyrhizobiaceae	Bradyrhizobium	Bradyrhizobium valentinum
tomato	0.042759	5893	4781	Eukaryota	NA	Oomycetes	Peronosporales	Peronosporaceae	Plasmopara	Plasmopara halstedii
tomato	0.046242	6373	1736433	Bacteria	Proteobacteria	Betaproteobacteria	Burkholderiales	NA	Rhizobacter	Rhizobacter sp. Root1221
soil	0.047834	6372	1797208	Bacteria	Actinobacteria	NA	NA	NA	NA	Actinobacteria bacterium RBG_19FT_COMBO_70_19
tomato	0.044328	6365	1736365	Bacteria	Proteobacteria	Betaproteobacteria	Burkholderiales	Comamonadaceae	Ramlibacter	Ramlibacter sp. Leaf400
soil	0.042983	6365	1387353	Bacteria	Planctomycetes	Planctomycetia	Planctomycetales	Isosphaeraceae	Paludisphaera	Paludisphaera borealis
tomato	0.037758	6358	864051	Bacteria	Proteobacteria	Betaproteobacteria	Burkholderiales	NA	NA	Burkholderiales bacterium JOSHI_001
tomato	0.037746	6356	113571	Bacteria	Actinobacteria	Actinobacteria	Micromonosporales	Micromonosporaceae	Actinoplanes	Actinoplanes rectilineatus
ruderals	0.038167	6356	54	Bacteria	Proteobacteria	Deltaproteobacteria	Myxococcales	Nannocystaceae	Nannocystis	Nannocystis exedens
soil	0.042916	6355	1703345	Bacteria	Bacteroidetes	Chitinophagia	Chitinophagales	Chitinophagaceae	Niastella	Niastella vici
soil	0.043444	6346	1866	Bacteria	Actinobacteria	Actinobacteria	Micromonosporales	Micromonosporaceae	Actinoplanes	Actinoplanes missouriensis
tomato	0.044175	6343	1895837	Bacteria	Bacteroidetes	Sphingobacteriia	Sphingobacteriales	NA	NA	Sphingobacteriales bacterium 44-15
soil	0.047609	6342	1632864	Bacteria	Planctomycetes	Planctomycetia	Planctomycetales	Planctomycetaceae	Planctomyces	Planctomyces sp. SH-PL14
soil	0.043376	6336	1797203	Bacteria	Actinobacteria	NA	NA	NA	NA	Actinobacteria bacterium RBG_16_68_12
ruderals	0.038041	6335	1660129	Bacteria	Proteobacteria	Alphaproteobacteria	Caulobacterales	Caulobacteraceae	Phenylobacterium	Phenylobacterium sp. SCN 70-31
soil	0.047541	6333	360056	Bacteria	Planctomycetes	Planctomycetia	Planctomycetales	Planctomycetaceae	Schlesneria	Schlesneria paludicola
tomato	0.045951	6333	1640513	Bacteria	Chloroflexi	NA	NA	NA	NA	Chloroflexi bacterium CSP1-4
ruderals	0.038259	6333	863522	Bacteria	Acidobacteria	Acidobacteriia	Acidobacteriales	Acidobacteriaceae	Bryocella	Bryocella elongata
ruderals	0.038005	6329	470	Bacteria	Proteobacteria	Gammaproteobacteria	Pseudomonadales	Moraxellaceae	Acinetobacter	Acinetobacter baumannii
soil	0.045959	6325	1882752	Bacteria	Planctomycetes	Planctomycetia	Planctomycetales	Isosphaeraceae	Singulisphaera	Singulisphaera sp. GP187
tomato	0.042461	6323	1736434	Bacteria	Proteobacteria	Betaproteobacteria	Burkholderiales	Comamonadaceae	Pelomonas	Pelomonas sp. Root1237
soil	0.042673	6319	462367	Bacteria	Bacteroidetes	Chitinophagia	Chitinophagales	Chitinophagaceae	Flavisolibacter	Flavisolibacter ginsengisoli
ruderals	0.037939	6318	360056	Bacteria	Planctomycetes	Planctomycetia	Planctomycetales	Planctomycetaceae	Schlesneria	Schlesneria paludicola
ruderals	0.037707	6318	1797501	Bacteria	Proteobacteria	Betaproteobacteria	NA	NA	NA	Betaproteobacteria bacterium RIFCSPLOWO2_12_FULL_65_14
ruderals	0.053005	6317	1396141	Bacteria	Verrucomicrobia	Verrucomicrobiae	Verrucomicrobiales	Verrucomicrobiaceae	Haloferula	Haloferula sp. BvORR071
soil	0.043225	6314	1640513	Bacteria	Chloroflexi	NA	NA	NA	NA	Chloroflexi bacterium CSP1-4
soil	0.042619	6311	1895839	Bacteria	Bacteroidetes	Sphingobacteriia	Sphingobacteriales	NA	NA	Sphingobacteriales bacterium 46-32
soil	0.04582	6306	173480	Bacteria	Gemmatimonadetes	Gemmatimonadetes	Gemmatimonadales	Gemmatimonadaceae	Gemmatimonas	Gemmatimonas aurantiaca
ruderals	0.03763	6305	155892	Bacteria	Proteobacteria	Alphaproteobacteria	Caulobacterales	Caulobacteraceae	Caulobacter	Caulobacter vibrioides
ruderals	0.038053	6299	134676	Bacteria	Actinobacteria	Actinobacteria	Micromonosporales	Micromonosporaceae	Actinoplanes	Actinoplanes sp. SE50/110
soil	0.042538	6299	173480	Bacteria	Gemmatimonadetes	Gemmatimonadetes	Gemmatimonadales	Gemmatimonadaceae	Gemmatimonas	Gemmatimonas aurantiaca
tomato	0.045668	6294	113571	Bacteria	Actinobacteria	Actinobacteria	Micromonosporales	Micromonosporaceae	Actinoplanes	Actinoplanes rectilineatus
soil	0.043068	6291	1759059	Bacteria	Proteobacteria	Alphaproteobacteria	Caulobacterales	Caulobacteraceae	NA	Caulobacteraceae bacterium OTSz_A_272
ruderals	0.037987	6288	1882752	Bacteria	Planctomycetes	Planctomycetia	Planctomycetales	Isosphaeraceae	Singulisphaera	Singulisphaera sp. GP187
soil	0.047173	6284	51	Bacteria	Proteobacteria	Deltaproteobacteria	Myxococcales	Polyangiaceae	Chondromyces	Chondromyces apiculatus
ruderals	0.039891	6276	173480	Bacteria	Gemmatimonadetes	Gemmatimonadetes	Gemmatimonadales	Gemmatimonadaceae	Gemmatimonas	Gemmatimonas aurantiaca
ruderals	0.039865	6272	673521	Bacteria	Actinobacteria	Actinobacteria	Geodermatophilales	Geodermatophilaceae	Blastococcus	Blastococcus endophyticus
soil	0.047061	6269	1799658	Bacteria	Planctomycetes	Planctomycetia	Planctomycetales	Planctomycetaceae	NA	Planctomycetaceae bacterium SCGC AG-212-F19
ruderals	0.052569	6265	1895832	Bacteria	Actinobacteria	Thermoleophilia	Solirubrobacterales	NA	NA	Solirubrobacterales bacterium 67-14
tomato	0.037199	6264	529705	Bacteria	Proteobacteria	Alphaproteobacteria	Sphingomonadales	Sphingomonadaceae	Sphingomonas	Sphingomonas changbaiensis
tomato	0.045443	6263	1617412	Bacteria	Chlorobi	NA	NA	NA	NA	Chlorobi bacterium OLB5
soil	0.042288	6262	1797497	Bacteria	Proteobacteria	Betaproteobacteria	NA	NA	NA	Betaproteobacteria bacterium RIFCSPLOWO2_12_FULL_62_58
soil	0.045973	6250	365533	Bacteria	Proteobacteria	Alphaproteobacteria	Rhodospirillales	Acetobacteraceae	Belnapia	Belnapia moabensis
ruderals	0.037495	6244	1736528	Bacteria	Proteobacteria	Betaproteobacteria	Burkholderiales	NA	Rhizobacter	Rhizobacter sp. Root404
tomato	0.041917	6242	1523422	Bacteria	Proteobacteria	Alphaproteobacteria	Caulobacterales	Caulobacteraceae	Brevundimonas	Brevundimonas sp. AAP58
soil	0.050238	6241	1235591	Bacteria	Proteobacteria	Alphaproteobacteria	Rhizobiales	NA	Pseudorhodoplanes	Pseudorhodoplanes sinuspersici
soil	0.042105	6235	1380388	Bacteria	Actinobacteria	Actinobacteria	Propionibacteriales	Nocardioidaceae	Nocardioides	Nocardioides sp. URHA0032
ruderals	0.037206	6234	1380353	Bacteria	Actinobacteria	Actinobacteria	Geodermatophilales	Geodermatophilaceae	NA	Geodermatophilaceae bacterium URHB0062
ruderals	0.0523	6233	433660	Bacteria	Actinobacteria	Actinobacteria	Propionibacteriales	Nocardioidaceae	Nocardioides	Nocardioides halotolerans
ruderals	0.037429	6233	207745	Bacteria	Proteobacteria	Betaproteobacteria	Burkholderiales	Comamonadaceae	Variovorax	Variovorax sp. WDL1
ruderals	0.037655	6233	56438	Bacteria	Actinobacteria	Actinobacteria	Micromonosporales	Micromonosporaceae	Couchioplanes	Couchioplanes caeruleus
ruderals	0.052292	6232	54	Bacteria	Proteobacteria	Deltaproteobacteria	Myxococcales	Nannocystaceae	Nannocystis	Nannocystis exedens
soil	0.042085	6232	1797495	Bacteria	Proteobacteria	Betaproteobacteria	NA	NA	NA	Betaproteobacteria bacterium RIFCSPLOWO2_12_FULL_62_13
tomato	0.043395	6231	1660139	Bacteria	Proteobacteria	Betaproteobacteria	Burkholderiales	NA	Rubrivivax	Rubrivivax sp. SCN 70-15
soil	0.042657	6231	1797661	Bacteria	Chloroflexi	NA	NA	NA	NA	Chloroflexi bacterium RBG_16_69_14
soil	0.042609	6224	135946	Bacteria	Actinobacteria	Actinobacteria	Micromonosporales	Micromonosporaceae	Actinoplanes	Actinoplanes awajinensis
tomato	0.045139	6221	113562	Bacteria	Actinobacteria	Actinobacteria	Micromonosporales	Micromonosporaceae	Actinoplanes	Actinoplanes derwentensis
soil	0.042554	6216	215803	Bacteria	Proteobacteria	Deltaproteobacteria	Myxococcales	NA	Enhygromyxa	Enhygromyxa salina
soil	0.0457	6213	1632864	Bacteria	Planctomycetes	Planctomycetia	Planctomycetales	Planctomycetaceae	Planctomyces	Planctomyces sp. SH-PL14
tomato	0.04208	6211	1895809	Bacteria	Actinobacteria	Actinobacteria	Pseudonocardiales	Pseudonocardiaceae	Pseudonocardia	Pseudonocardia sp. 73-21
ruderals	0.037498	6207	1660160	Bacteria	Acidobacteria	NA	NA	NA	NA	Acidobacteria bacterium SCN 69-37
soil	0.049965	6207	360054	Bacteria	Acidobacteria	Solibacteres	Solibacterales	Bryobacteraceae	Bryobacter	Bryobacter aggregatus
soil	0.045634	6204	1190417	Bacteria	Actinobacteria	Actinobacteria	Geodermatophilales	Geodermatophilaceae	Geodermatophilus	Geodermatophilus telluris
tomato	0.042013	6201	113571	Bacteria	Actinobacteria	Actinobacteria	Micromonosporales	Micromonosporaceae	Actinoplanes	Actinoplanes rectilineatus
soil	0.042424	6197	1895709	Bacteria	Proteobacteria	Alphaproteobacteria	NA	NA	NA	Alphaproteobacteria bacterium 64-11
soil	0.046505	6195	722472	Bacteria	Proteobacteria	Alphaproteobacteria	Rhizobiales	Bradyrhizobiaceae	Bradyrhizobium	Bradyrhizobium lablabi
soil	0.041801	6190	1805208	Bacteria	Gemmatimonadetes	Gemmatimonadetes	Gemmatimonadales	Gemmatimonadaceae	Gemmatimonas	Gemmatimonas sp. 13_1_20CM_3_60_15
soil	0.04646	6189	1797661	Bacteria	Chloroflexi	NA	NA	NA	NA	Chloroflexi bacterium RBG_16_69_14
soil	0.049779	6184	1391654	Bacteria	Proteobacteria	Deltaproteobacteria	Myxococcales	Labilitrichaceae	Labilithrix	Labilithrix luteola
ruderals	0.03686	6176	1660129	Bacteria	Proteobacteria	Alphaproteobacteria	Caulobacterales	Caulobacteraceae	Phenylobacterium	Phenylobacterium sp. SCN 70-31
tomato	0.041837	6175	1518501	Bacteria	Proteobacteria	Alphaproteobacteria	Rhizobiales	Bradyrhizobiaceae	Bradyrhizobium	Bradyrhizobium valentinum
tomato	0.041461	6174	171674	Bacteria	Proteobacteria	Alphaproteobacteria	Rhodospirillales	Rhodospirillaceae	Inquilinus	Inquilinus limosus
soil	0.04168	6172	1691979	Bacteria	Bacteroidetes	Chitinophagia	Chitinophagales	Chitinophagaceae	NA	Chitinophagaceae bacterium PMP191F
soil	0.042239	6170	80871	Bacteria	Actinobacteria	Actinobacteria	Frankiales	Cryptosporangiaceae	Cryptosporangium	Cryptosporangium arvum
soil	0.045369	6168	1267535	Bacteria	Acidobacteria	Acidobacteriia	Acidobacteriales	Acidobacteriaceae	NA	Acidobacteriaceae bacterium KBS 96
tomato	0.041414	6167	1736430	Bacteria	Proteobacteria	Betaproteobacteria	Burkholderiales	Comamonadaceae	Pelomonas	Pelomonas sp. Root1217
tomato	0.036612	6165	1632864	Bacteria	Planctomycetes	Planctomycetia	Planctomycetales	Planctomycetaceae	Planctomyces	Planctomyces sp. SH-PL14
ruderals	0.036794	6165	549295	Bacteria	Bacteroidetes	Chitinophagia	Chitinophagales	Chitinophagaceae	Flavihumibacter	Flavihumibacter petaseus
ruderals	0.051688	6160	94132	Bacteria	Proteobacteria	Betaproteobacteria	Burkholderiales	Comamonadaceae	Ramlibacter	Ramlibacter tataouinensis
ruderals	0.036954	6154	65499	Bacteria	Actinobacteria	Actinobacteria	Pseudonocardiales	Pseudonocardiaceae	Lentzea	Lentzea albida
ruderals	0.03671	6151	104176	Bacteria	Chloroflexi	Chloroflexia	Chloroflexales	Oscillochloridaceae	Oscillochloris	Oscillochloris trichoides
soil	0.042109	6151	1380394	Bacteria	Proteobacteria	Alphaproteobacteria	Rhodospirillales	NA	NA	Rhodospirillales bacterium URHD0088
ruderals	0.036675	6145	1617415	Bacteria	Chloroflexi	NA	NA	NA	NA	Chloroflexi bacterium OLB14
ruderals	0.039058	6145	1302690	Bacteria	Bacteroidetes	Chitinophagia	Chitinophagales	Chitinophagaceae	Cnuella	Cnuella takakiae
ruderals	0.039058	6145	1895837	Bacteria	Bacteroidetes	Sphingobacteriia	Sphingobacteriales	NA	NA	Sphingobacteriales bacterium 44-15
ruderals	0.037099	6141	1895708	Bacteria	Proteobacteria	Alphaproteobacteria	NA	NA	NA	Alphaproteobacteria bacterium 62-8
tomato	0.041232	6140	107709	Bacteria	Verrucomicrobia	Opitutae	Opitutales	Opitutaceae	Opitutus	Opitutus terrae
ruderals	0.038994	6135	1379270	Bacteria	Gemmatimonadetes	Gemmatimonadetes	Gemmatimonadales	Gemmatimonadaceae	Gemmatimonas	Gemmatimonas phototrophica
ruderals	0.038988	6134	94132	Bacteria	Proteobacteria	Betaproteobacteria	Burkholderiales	Comamonadaceae	Ramlibacter	Ramlibacter tataouinensis
tomato	0.041179	6132	354355	Bacteria	Bacteroidetes	Chitinophagia	Chitinophagales	Chitinophagaceae	Niastella	Niastella yeongjuensis
tomato	0.036404	6130	354355	Bacteria	Bacteroidetes	Chitinophagia	Chitinophagales	Chitinophagaceae	Niastella	Niastella yeongjuensis
ruderals	0.036567	6127	482564	Bacteria	Cyanobacteria	NA	Oscillatoriales	Oscillatoriaceae	Oscillatoria	Oscillatoria nigro-viridis
soil	0.04452	6127	53368	Bacteria	Actinobacteria	Actinobacteria	Micromonosporales	Micromonosporaceae	Hamadaea	Hamadaea tsunoensis
soil	0.045061	6126	41	Bacteria	Proteobacteria	Deltaproteobacteria	Myxococcales	Archangiaceae	Stigmatella	Stigmatella aurantiaca
soil	0.041938	6126	407019	Bacteria	Proteobacteria	Alphaproteobacteria	Sphingomonadales	Sphingomonadaceae	Sphingomonas	Sphingomonas astaxanthinifaciens
ruderals	0.036555	6125	941907	Bacteria	Proteobacteria	Alphaproteobacteria	Sphingomonadales	Sphingomonadaceae	Sphingomonas	Sphingomonas indica
ruderals	0.036714	6114	1803462	Bacteria	Acidobacteria	NA	NA	NA	NA	Acidobacteria bacterium 13_2_20CM_2_66_4
ruderals	0.03669	6110	1882752	Bacteria	Planctomycetes	Planctomycetia	Planctomycetales	Isosphaeraceae	Singulisphaera	Singulisphaera sp. GP187
soil	0.041261	6110	550983	Bacteria	Bacteroidetes	Chitinophagia	Chitinophagales	Chitinophagaceae	Niastella	Niastella populi
ruderals	0.038823	6108	103441	Bacteria	Actinobacteria	Actinobacteria	Pseudonocardiales	Pseudonocardiaceae	Pseudonocardia	Pseudonocardia spinosispora
soil	0.041637	6082	1882682	Bacteria	Proteobacteria	Alphaproteobacteria	Rhizobiales	Methylobacteriaceae	Microvirga	Microvirga ossetica
tomato	0.036095	6078	171674	Bacteria	Proteobacteria	Alphaproteobacteria	Rhodospirillales	Rhodospirillaceae	Inquilinus	Inquilinus limosus
tomato	0.042281	6071	125	Bacteria	Planctomycetes	Planctomycetia	Planctomycetales	Planctomycetaceae	Pirellula	Pirellula staleyi
ruderals	0.038569	6068	1703404	Bacteria	Proteobacteria	Gammaproteobacteria	NA	NA	NA	Gammaproteobacteria bacterium SG8_30
soil	0.041527	6066	420324	Bacteria	Proteobacteria	Alphaproteobacteria	Rhizobiales	Methylobacteriaceae	Microvirga	Microvirga lupini
tomato	0.035923	6049	1759059	Bacteria	Proteobacteria	Alphaproteobacteria	Caulobacterales	Caulobacteraceae	NA	Caulobacteraceae bacterium OTSz_A_272
soil	0.041411	6049	33	Bacteria	Proteobacteria	Deltaproteobacteria	Myxococcales	Myxococcaceae	Myxococcus	Myxococcus fulvus
tomato	0.040601	6046	1691979	Bacteria	Bacteroidetes	Chitinophagia	Chitinophagales	Chitinophagaceae	NA	Chitinophagaceae bacterium PMP191F
ruderals	0.036507	6043	1379270	Bacteria	Gemmatimonadetes	Gemmatimonadetes	Gemmatimonadales	Gemmatimonadaceae	Gemmatimonas	Gemmatimonas phototrophica
ruderals	0.038403	6042	1349421	Bacteria	Bacteroidetes	Chitinophagia	Chitinophagales	Chitinophagaceae	Flavihumibacter	Flavihumibacter solisilvae
soil	0.045342	6040	1429438	Bacteria	Candidatus Tectomicrobia	NA	NA	NA	Candidatus Entotheonella	Candidatus Entotheonella sp. TSY1
soil	0.040775	6038	573321	Bacteria	Bacteroidetes	Chitinophagia	Chitinophagales	Chitinophagaceae	Chitinophaga	Chitinophaga rupis
tomato	0.042037	6036	45677	Bacteria	Proteobacteria	Betaproteobacteria	Burkholderiales	Alcaligenaceae	Azohydromonas	Azohydromonas lata
ruderals	0.038352	6034	1855728	Bacteria	Proteobacteria	Betaproteobacteria	Burkholderiales	Comamonadaceae	Variovorax	Variovorax sp. KK3
soil	0.044251	6016	909625	Bacteria	Actinobacteria	Rubrobacteria	Rubrobacterales	Rubrobacteraceae	Rubrobacter	Rubrobacter aplysinae
tomato	0.041891	6015	470	Bacteria	Proteobacteria	Gammaproteobacteria	Pseudomonadales	Moraxellaceae	Acinetobacter	Acinetobacter baumannii
tomato	0.041877	6013	1895717	Bacteria	Armatimonadetes	NA	NA	NA	NA	Armatimonadetes bacterium 55-13
ruderals	0.03632	6012	1429916	Bacteria	Proteobacteria	Alphaproteobacteria	Rhizobiales	Bradyrhizobiaceae	Afipia	Afipia sp. P52-10
soil	0.041151	6011	1492898	Bacteria	Bacteroidetes	Chitinophagia	Chitinophagales	Chitinophagaceae	Flavisolibacter	Flavisolibacter sp. LCS9
tomato	0.043593	6008	649831	Bacteria	Actinobacteria	Actinobacteria	Micromonosporales	Micromonosporaceae	Actinoplanes	Actinoplanes sp. N902-109
tomato	0.043593	6008	1547922	Bacteria	Proteobacteria	Betaproteobacteria	Burkholderiales	NA	Ideonella	Ideonella sakaiensis
ruderals	0.04088	4872	1353260	Archaea	Thaumarchaeota	Nitrososphaeria	Nitrososphaerales	Nitrososphaeraceae	Candidatus Nitrosocosmicus	Candidatus Nitrocosmicus oleophilus
ruderals	0.036066	6006	1797663	Bacteria	Chloroflexi	NA	NA	NA	NA	Chloroflexi bacterium RBG_16_72_14
tomato	0.040319	6004	1895753	Bacteria	Proteobacteria	Alphaproteobacteria	Rhizobiales	Hyphomicrobiaceae	Devosia	Devosia sp. 66-22
soil	0.045034	5999	1892846	Bacteria	Proteobacteria	Alphaproteobacteria	Rhizobiales	Hyphomicrobiaceae	Hyphomicrobium	Hyphomicrobium sp. NDB2Meth4
tomato	0.035602	5995	113562	Bacteria	Actinobacteria	Actinobacteria	Micromonosporales	Micromonosporaceae	Actinoplanes	Actinoplanes derwentensis
soil	0.040471	5993	551276	Bacteria	Actinobacteria	Actinobacteria	Pseudonocardiales	Pseudonocardiaceae	Pseudonocardia	Pseudonocardia acaciae
ruderals	0.035761	5992	1128421	Bacteria	NA	NA	NA	NA	NA	bacterium JKG1
tomato	0.040232	5991	482630	Bacteria	Cyanobacteria	NA	Nostocales	Tolypothrichaceae	Hassallia	Hassallia byssoidea
soil	0.044966	5990	1518501	Bacteria	Proteobacteria	Alphaproteobacteria	Rhizobiales	Bradyrhizobiaceae	Bradyrhizobium	Bradyrhizobium valentinum
tomato	0.040549	5985	1736549	Bacteria	Proteobacteria	Gammaproteobacteria	Xanthomonadales	Xanthomonadaceae	Lysobacter	Lysobacter sp. Root494
[truncated: 330,366+ more rows]
