# Supplementary material for: Testing the Two-Step Model of Plant Root Microbiome Acquisition Under Multiple Plant Species and Soil Sources
Source: Front Microbiol. 2020 Oct 9;11:542742. doi: 10.3389/fmicb.2020.542742 (PMC7581803; doi:10.3389/fmicb.2020.542742)
Supplement: Supplementary file 13 [file Table_12.XLSX]

## Sheet: Tomato_Core
M5NRid	annotation
092f2f40e01ec750189de0d01842c968	1-deoxy-D-xylulose_5-phosphate_reductoisomerase
abcb690d917b73d5d8ea25bc4e0baacd	1-deoxy-D-xylulose_5-phosphate_reductoisomerase
056374e5f6cc04a751eee30a97135068	1-deoxy-D-xylulose-5-phosphate_synthase
710e5c2f5a0b78ef08bd7e4223df34de	1-hydroxy-2-methyl-2-e-butenyl_4-diphosphate_synthase
22939b9a41021573af125194ec98c1b8	14-alpha-glucan_branching_enzyme
d7dc83619dbec77da1b6fb3a631c8768	16S_rRNA_processing_protein_RimM
9df85c30c7399270ed895ea66a57bf64	1A_family_penicillin-binding_protein
62ba9439f56cc13a7bbb62604f451e25	2-amino-3-carboxymuconate-6-semialdehyde_decarboxylase
9f6d85f31e18c4cef09f69273382dcfb	2-aminomuconic_semialdehyde_dehydrogenase
4703f14115b54fe818adeda1c58389bc	2-C-methyl-D-erythritol_4-phosphate_cytidylyltransferase
f536749253020cb86eb0a5c35ab277bf	2-dehydro-3-deoxyphosphogalactonate_aldolase
80c14c2eec639bc4c5540c9185130e35	2-deoxy-scyllo-inosamine_dehydrogenase
2337e3681bee830555e9eaab5001613c	2-hydroxycyclohexanecarboxyl-CoA_dehydrogenase
18a44c754fbb01716477c60edd2d7136	2-isopropylmalate_synthase
b3bea827e20f7a050c4f8155a9fdfec0	2-isopropylmalate_synthase
5b442dba38df93bd4cda658805e01039	2-ketoglutarate_NADP_oxidoreductase_beta_subunit
af023e9d6f7d48d62ab5678d019edfdb	2-methylcitrate_dehydratase
db21c285b28633659aa406fe63d36b8b	2-nitropropane_dioxygenase_family_protein
0117e42c0a9f97a84f8485d375c0ab6c	2-nitropropane_dioxygenase_NPD
01404daaa81e1a9627de803963ce4e89	2-nitropropane_dioxygenase_NPD
beaba99ccfedca17e83e006ebeb23740	2-nitropropane_dioxygenase_NPD
fb14e2fdd06e07e3a6bd5c3adbffee65	2-nitropropane_dioxygenase_NPD
b9780a34c23de5383dde075b2086dcc7	2-octaprenyl-3-methyl-6-methoxy-14-benzoquinol_hydroxylase
7de39720992676908f21f01f7c4045f5	2-octaprenylphenol_hydroxylase
bca4b0f2fe7ecef666f1287ba161ead4	2-oxo_acid_dehydrogenase_E1_component_alpha-beta_subunit
5ebd20de5b521d53be696879d47fc1fa	2-oxo-acid_dehydrogenase_E1_subunit_homodimeric_type
1f205925ea92f3d9d9da064bcf404a1d	2-oxoglutarate_dehydrogenase_E1_component
784043f9aeed8e344978b5c10e434bb3	2-oxoglutarate_dehydrogenase_E1_component
7e583272cfae6f2e66da1fdbd2c2d71e	2-oxoglutarate_dehydrogenase_E1_component
8dc7eccdb87442e372cc0dcff12ed4f6	2-oxoglutarate_dehydrogenase_E1_component
af16095940f5429b1c0b8af1fc33d8e1	2-oxoglutarate_dehydrogenase_E1_component
f3d6362733f0ae0fd4b19ce51218a6e5	2-oxoglutarate_dehydrogenase_E1_component
359fe1ecf8505b2e923cd20c49f86202	2-oxoglutarate_dehydrogenase_E1_subunit
c821dd1a04bfa3f76d578e3088c7ec5c	2-oxoglutarate_dehydrogenase_E2_component
13a3f740dee6e06a5472b79d221661b6	2-oxoglutarate_ferredoxin_oxidoreductase_alpha_subunit
21bde52cefcb45b4d912dd5a4bf6665c	2-oxoglutarate_ferredoxin_oxidoreductase_subunit_beta
33b02509c2bb24ea5f1a2d5de77dc402	2-oxoisovalerate_dehydrogenase_beta_subunit
99f17e8af4b4b54286a3851ca2fe8099	2-oxoisovalerate_dehydrogenase_E1_component_beta_subunit
87bbb117be5b8a13700bd22d0dca5ceb	24-dienoyl-CoA_reductase_NADPH2
09717c536d63d656e33e658a93c8609e	2OG-FeII_oxygenase
6013fff253a5ee3406fa0070128d2c12	3-hydroxyacyl-CoA_dehydrogenase
beb21f4d1c7c99ca308e75f5d5c900b7	3-hydroxyacyl-CoA_dehydrogenase
2f6fc4b4f4b05803351cff63e0f1aec9	3-hydroxyacyl-CoA_dehydrogenase_NAD-binding
831eb35aa4fbc96c7b57a2e6133f68ce	3-hydroxyacyl-CoA_dehydrogenase_NAD-binding
c451577b0cdc9ba2e97aa8fc7befae2d	3-hydroxyacyl-CoA_dehydrogenase_NAD-binding
789c2dda5aa31b6ed6e790b45c25d9ab	3-hydroxybutyryl-CoA_dehydrogenase
bcf4e597af307d431d350291cf4924aa	3-hydroxyisobutyrate_dehydrogenase
f3cceca07971b586c9015d7db68c681c	3-isopropylmalate_dehydrogenase
b27c7a17f3db3ee62876cfa5c9770bae	3-isopropylmalate-R-2-methylmalate_dehydratase_small_subunit
033753fddf5fc61d259dbdf55b1ff8ef	3-ketosteroid-delta-1-dehydrogenase
63b70a532e683d0f16e4a92a93723722	3-ketosteroid-delta-1-dehydrogenase
1893b73d9ebbed8a7cfb99cf4b92829f	3-methyl-2-oxobutanoate_dehydrogenase
eb63b96b63cb1a1c40a96a63b70d39de	3-methyl-2-oxobutanoate_hydroxymethyltransferase
94f756372c1f362d22c2f7f2abbfde07	3-oxoacid_CoA-transferase_A_subunit
acd38782dce4d2c6dccec2e92a219b62	3-oxoacid_CoA-transferase_A_subunit
171d08be75b189fa7a33272c026f11c2	3-oxoacyl-acyl-carrier-protein_reductase
7f670a5d1a446fc43987676b246de96f	3-oxoacyl-acyl-carrier-protein_synthase_II
7bb277258c760910c415e2827d205b70	3-oxoacyl-acyl-carrier-protein_synthase_III
ec09c1070b0035047718729cec31ae53	3-oxoacyl-acyl-carrier-protein_synthase_III
9e1155818656de80866981bdda690d93	3-phosphoshikimate_1-carboxyvinyltransferase
85c242484c77f4d686341df9d505816c	3-phytase_fusion_putative
08e7ee9af73340ae270f5c3ef4df8b34	30S_ribosomal_protein_S1
bde90aa943da4eb03326fca7b8192929	30S_ribosomal_protein_S10
6ab23d44fcc608f98ab65068033c70a8	30S_ribosomal_protein_S11
83e1454dea5130184a5b5b30d2bd54ff	30S_ribosomal_protein_S13
867c3992c9bedde1349955e7617ce7bd	30S_ribosomal_protein_S14
4ac404ba19d06a17f84d1e1e47c1c043	30S_ribosomal_protein_S2
0a2755667053d665a91a420e8e8a717c	30S_ribosomal_protein_S3P
302f2ada6e58956f3f5c1246d357698e	30S_ribosomal_protein_S4
b62f0ae95b8901a6b20f60c292970f04	30S_ribosomal_protein_S8
382a252105dd1c88cdea086ec4564914	34-dihydroxy-2-butanone_4-phosphate_synthase
a5aeee920989b6420812b885abaf906d	34-dihydroxy-2-butanone_4-phosphate_synthase
be76f52897a29af5e66961c5d9c330b2	4-hydroxy-2-ketovalerate_aldolase
d88c843e62034ae2e7b2354080442c20	4-hydroxy-3-methylbut-2-en-1-yl_diphosphate_synthase
2a78fc4de15a5ba8ec5367f2ae179c3e	4-hydroxy-3-methylbut-2-enyl_diphosphate_reductase
3e4a631da708ba669d9ebb3abb3819a6	4-hydroxy-3-methylbut-2-enyl_diphosphate_reductase
e0369c29b812a4588c65e7798b1f0395	4-hydroxy-3-methylbut-2-enyl_diphosphate_reductase
10498659c0542ff88dc9ec7cf08744c3	4-hydroxythreonine-4-phosphate_dehydrogenase
d4eda453b7a46e45789ce2f5b0d047c0	4-hydroxythreonine-4-phosphate_dehydrogenase
a266c6684dd741222e05f20ac9d0170f	4-phosphopantetheinyl_transferase
d09b4920067ba371fd1e7c544675d862	4Fe-4S_ferredoxin_iron-sulfur_binding_domain_protein
14546fd06ced68b9dbc4d54d042b9510	5-3_exonuclease
66baa1dd03cacc1ab00668c6af5a3948	5-3_exonuclease_N-terminal_resolvase-like_domain
71ade9cf3f1513f704144945aa9f89ec	5-formyltetrahydrofolate_cyclo-ligase
ea749838ca4c3092326a8f3ae7021582	5-methyltetrahydrofolate--homocysteine_methyltransferase
29ffc68365cf38e4e0ec2eda880e9d66	5-methyltetrahydrofolate-homocysteine_methyltransferase
846c584eaec8c645bd02067c7a91d669	5-methyltetrahydrofolate-homocysteine_methyltransferase
40254ee849a6ac190e04d96b16d04197	50S_ribosomal_protein_L1
606d280be5d62b41b275bb59689c7684	50S_ribosomal_protein_L1
23e3a7dabfdc7d395ebf1e5993a3c443	50S_ribosomal_protein_L10
0104874a8efe6c76cc9d1d986c5d28f1	50S_ribosomal_protein_L13
665f28586387d056c8dff72a9ecf0b23	50S_ribosomal_protein_L13
a8e6ed2d33446896952cf8e6ef0396a3	50S_ribosomal_protein_L16
6611fea4115964218479bf479782fe8f	50S_ribosomal_protein_L25-general_stress_protein_Ctc
de7c99ec4acafac40dc15faed4f40c14	50S_ribosomal_protein_L3
dc8d197ec7288e3d883014da2df995b8	50S_ribosomal_protein_L6
b402501c85181eac9f5f070831868720	510-methylenetetrahydrofolate_reductase_FADH
6ba1867cbb31af606a1fc16f65697f2e	510-methylenetetrahydromethanopterin_reductase
c801f5ac54959ed34ada34161f55acb7	6-phosphofructokinase
30ee765823eabe50b12843327a436d87	6-phosphogluconate_dehydratase
d437bb06adf371ce4d413ca179fa9b59	60_kDa_chaperonin
395e99fa3afbb759899668d8b9e091ef	60_kDa_inner_membrane_insertion_protein
2e12970cfc47fe7fc28ea83c13596bb2	A-G-specific_DNA-adenine_glycosylase
2106efc9151cce5d4c2103639037ec81	A-glucan_phosphorylase
5384369b02c3ba7966306122916b1e30	AAA_ATPase_central_domain-containing_protein
a1b4a3e678584140a1f0471b1de3238e	AAA_ATPase_central_domain-containing_protein
e757908c4a791ea924524c54b96a1300	AAA_family_ATPase_CDC48_subfamily_protein
6fd30101453539121e8dbc05565b0320	ABC_superfamily_ATP_binding_cassette_transporter
4e133151aff2bd5011c444bfcde93c84	ABC_transporter_ATP-binding_protein
6250e3392ac2703cee0a133178fa426a	ABC_transporter_ATP-binding_protein
76532be2ff1e1004e03d619e530d67b3	ABC_transporter_ATP-binding_protein
7ccc45607583ff4d338620af82c04c80	ABC_transporter_ATP-binding_protein
8f4dc6900c46fae626af84c49efa2f4d	ABC_transporter_ATPase
1c7cd3cf9fc35e62ab9b714719391da0	ABC_transporter_ATPase_subunit
6a63f9bf4fdd081fe4dd764adadc0825	ABC_transporter_membrane_spanning_protein_amino_acid
8fb1672fd70d31d7a7fe87c5445aac38	ABC_transporter_permease
ced771112beb060ebf8b0b18b610f0d5	ABC_transporter_permease
2680cb62d8d9d2e2c929b1f29a75af5b	ABC_transporter_permease_protein
8992d1c4e5e3e5f9779907c34ac2cfce	ABC_transporter_permease_protein
07b62506c9b03c741d817411586b3d80	ABC_transporter_related
0ca01a001085933a48c63ee1e73a26b7	ABC_transporter_related
0f3d826af54dc57afbecfe4be7d264c7	ABC_transporter_related
28eee7d1dc195e6c00cae6b1b4f13bca	ABC_transporter_related
2ea4cad8d311595e3fcdab978cb1c32a	ABC_transporter_related
4b13d8633c4ff279d9484ac0561c9772	ABC_transporter_related
62b9e6cc4afbe564b44d7993a547854c	ABC_transporter_related
7bb302cbdc7ed3307564011f6d74d35c	ABC_transporter_related
81b1f9759d6b816b316f85a524f34c46	ABC_transporter_related
9761d05d09099438b4e6f673f4ea2294	ABC_transporter_related
c0b010fd5408c01678b44fb3aa72a4dc	ABC_transporter_related
1f71dfcebacf9a74d42a4e50f61cbe60	abc_transporter_related_protein
31536b1a734fb9488ad68b06e09419f5	ABC_transporter_related_protein
378f774ec459144f975431e2804c5e4d	abc_transporter_related_protein
777b5e64668d35cfea04d9045bf2631b	ABC_transporter_related_protein
8ff8079aa9ee63857dc563abfb8cea39	ABC_transporter_related_protein
3ad37157775e4ea425fc7be6673f825e	ABC_transporter-like_protein
9c3e32723d1c1d0c8a5a93f0a9660299	ABC_transporter-like_protein
cf0f2673dc5978198596eba1ea20a597	ABC_transporter-like_protein
e4db2fe9df80b4925eb3bc5bc9de56e4	ABC_transporter-like_protein
37a4e93cc6fb0a3617cfd73dda8effde	ABC_transporter-related_protein
3f227c5aed4cf5aa627c0d98db1dc7f2	ABC_transporter-related_protein
8d6956d0ed785a04ad23ebee04d89a1d	ABC_transporter-related_protein
ad970a8eddb70de8ddf353955dec6a1f	ABC_transporter-related_protein
c6f090b595749c485019356c2f15ad22	ABC_transporter-related_protein
d3f4df921585cc9d1348fc7c2378f8c4	ABC_transporter-related_protein
fbe4d9b610da6d7918c7a65960242607	ABC_transporter-related_protein
9a6c61043e08b043f4c93ca379456330	ABC_type_transporter
4059999f90af408428f22df34d0ad9eb	ABC-2_type_transporter
ead65cfacc9ec15c31e797c10e0251b9	ABC-type_transport_system_periplasmic_component
0bf6292a9999eecbaf4661a018bd1a3f	ABC-type_transport_system_permease_component_LinK
f19e226bc3e209c3b3ef55aa4d9fea4f	ABC-type_uncharacterized_transport_system_permease_component-like_protein
76281d06b13d31787fa50fd3c60963a2	acetate-CoA_ligase
b79e1f62d83eb30a56055a5dea64d7ee	acetate-CoA_ligase
7fa4b2419bacd25a430cdbade580ee58	acetolactate_synthase_large_subunit
a4fb77e3bc715f4b6b8e28fd532b5343	acetolactate_synthase_large_subunit_biosynthetic_type
35ba07ec4c6b9c345d52b1419ab81e26	acetolactate_synthase_small_subunit
7a3a8d00c364d279d793023acbc56787	acetolactate_synthase_small_subunit
40a15ef70152d957bb997c0d195ba9fa	acetyl-CoA_acetyltransferase
7b0593fe4168089956d09830d8a143a4	acetyl-CoA_acetyltransferase
bc5938e5a71261f4dfa2d657dfb88c3e	acetyl-CoA_acetyltransferase
c955ab8a35c1ca712c8c916a1467b259	acetyl-CoA_acetyltransferase
dc772e77f2a116cb4b6b8b08ac5e3284	acetyl-CoA_acetyltransferase
dcfe3f98a2a43145cfd75b76b350e0c5	acetyl-CoA_acyltransferase
1d0756ad772d92052dd4cc2b2106e35f	acetyl-CoA_carboxylase_biotin_carboxyl_carrier_protein
609db111aa3fc5fbd06cff8f977d2486	acetyl-CoA_carboxylase_biotin_carboxyl_carrier_protein
917a0043979bd971d9ef7aa40070a349	acetyl-CoA_carboxylase_biotin_carboxyl_carrier_protein
2141b8fb3b1ba0f469d4d52dfb510d7b	acetyl-CoA_carboxylase_biotin_carboxylase
3b3684cc625d079dce8af4256bee69e4	acetyl-CoA_carboxylase_biotin_carboxylase
369323ae5b43c0cf6e0448ab6a775c08	acetyl-CoA_carboxylase_carboxyl_transferase_beta_subunit
81de3ec9b8ae4135eb37cdf674ac7504	acetyl-CoA_carboxylase_carboxyl_transferase_subunit_alpha
eac5c19c7de125835331dcf9fcf148ad	acetyl-CoA_carboxylase_carboxyl_transferase_subunit_alpha
a40dd952be91ebfbd537f34ec32abde1	acetyl-CoA_carboxylase_carboxyl_transferase_subunit_beta
bdc560e589e382aa47db4ac9222abdf2	Acid_phosphatase
a232c7a5e06b87e7c5006e4eecc14cda	aconitase
401e53b29b70f33bc6abb4b351ed978a	aconitate_hydratase
9bfea4cdbd9c4d705e36e0bb9c0c5ac7	aconitate_hydratase
c3e5045988f9275583e749d50c65cb8d	aconitate_hydratase_1
cce7aeb749007a3909d90db1cb7ef72e	AcrB-AcrD-AcrF_family_efflux_transporter_inner_membrane_protein
5f7a4ce4ddb7183e9c87c46c74756fec	AcrB-AcrD-AcrF_family_membrane_protein
ccf37cf527c5babb3bbdd9eaf632cb61	AcrB-AcrD-AcrF_family_protein
04b51278b1e0f78eb0595a75306faa3d	acriflavin_resistance_protein
121517a07d9d0510f85918aace393cf3	acriflavin_resistance_protein
1b8038472143e18f7f4288032d15f23b	acriflavin_resistance_protein
2d7ce7be006afdd14895151dbde49e64	acriflavin_resistance_protein
4e69fbec5f0b725cbc85e14372de3a05	acriflavin_resistance_protein
5559a075a00d5a2aa65aae04ba25b0b8	acriflavin_resistance_protein
6fae02620b90d60b634dc7280d1dc887	acriflavin_resistance_protein
70c28783cbc6d6bf81ef5878bae29ec8	acriflavin_resistance_protein
d111fa742ce78aec82900e4a87e4e25d	acriflavin_resistance_protein
e497adb4e144d53f7dd58ef828065796	acriflavin_resistance_protein
ec6ae9fe6d05817d3b0053181442861d	acriflavin_resistance_protein
28cb0420020a7a1324f6b33629233bda	Activator_of_Hsp90_ATPase_1_family_protein
2dcd9f22b2bda8f12a951c3e64c3b27c	Activator_of_Hsp90_ATPase_1_family_protein
363be95b36420ea01492c31c021aacc7	acyl_carrier_protein
27eb8741268a01f719191d63f3bac52c	Acyl_CoAacetate-3-ketoacid_CoA_transferase_beta_subunit-like_protein
268976a7827303efe33f348df454ca1e	acyl-CoA_dehydrogenase
8d853a18eddc41c7873e886db69dbfc8	acyl-CoA_dehydrogenase
afaac6a37faa2f6c615c9670037d4aeb	acyl-CoA_dehydrogenase
9074b172052ef992edb7593ad2d18f24	acyl-CoA_dehydrogenase_domain_protein
2cffa934440f65cb19ea6f8c46649ae7	acyl-CoA_dehydrogenase_domain-containing_protein
364c1b19ae3e8afbc6d53008ea9f3161	acyl-CoA_dehydrogenase_domain-containing_protein
649f88d8970bff9e597b0acbd9cb7816	acyl-CoA_dehydrogenase_domain-containing_protein
7d8873eb991ca66f1cc42c59564c336b	acyl-CoA_dehydrogenase_domain-containing_protein
cff8d46ffe12d2f3177e71459f9bd242	acyl-CoA_dehydrogenase_domain-containing_protein
3ca13b5a7cfd73268262fa9b3ccecea1	acyl-CoA_dehydrogenase_type_2
9c22cf6d14e41874b23a72bcb16cf44a	acyl-CoA_dehydrogenase-like
becfe488f7ac80810647591fdc75b834	acyl-CoA_dehydrogenase-like_protein
2368ef5e1e81161fa1821357826b74d2	acyl-CoA_ligase_AMP-forming_exosortase_system_type_1_associated
33ba9c7d0427d994ae0202b2490bc296	acyl-CoA_synthetase
3577b0ea83e7f867c05414f825644126	acyltransferase
7394195df9166ec09cd9442c496c91a9	acyltransferase
a98e733a74c01a6c100d76f519265139	acyltransferase_3
5ec41eeaf1637af7f0782bd7cc595640	adenine_phosphoribosyltransferase
bc922d486d45b865823c5a02acb22034	adenylate_cyclase
013e3bbd911d3149aa10c3f80ae8c5a4	adenylate-guanylate_cyclase_with_Chase_sensor
9fa8c2f62e2f4c3899d798c1ffb2ac9e	adenylosuccinate_synthase
eaee36d399d2147561cc0013bfa694bb	adenylosuccinate_synthetase
5cdb6e29c3029d9c033cb08aa31179c5	adenylyl_cyclase_class-3-4-guanylyl_cyclase
e312645f057ecedaae61a0d498dc3d17	adenylyl_cyclase_class-3-4-guanylyl_cyclase
2e05c3bb51090b4006a1d58d5792eef9	alanine_racemase
db2e23f6cab04049a5dc8c966c712b7d	alanine_racemase
318dc3cf47c3e2354b3506319918a10b	alanyl-tRNA_synthetase
33bd3d7a03c94eaf4ae330b360e5a860	alanyl-tRNA_synthetase
3f10b3b2887531a1749e7a27cd96fbc6	alanyl-tRNA_synthetase
51ef9edcd3a4bc1a84a1c60912a56aaa	alanyl-tRNA_synthetase
536c1bf1b1348c8b204dbeaf2280e54c	alanyl-tRNA_synthetase
546c4627e34dc322888d8e64f5fbeda1	alanyl-tRNA_synthetase
de88415178156f47977f3836486db142	alcohol_dehydrogenase
f7d33d2d923077ecb16f18ab3d05b760	alcohol_dehydrogenase
1dbc43681c1ada876adf5f012dc4be63	Alcohol_dehydrogenase_GroES_domain_protein
475ebd7b9c41ce3531a052738da970d4	Alcohol_dehydrogenase_GroES_domain_protein
6f74bd595c5173c0cb6edf62f5c9b678	Alcohol_dehydrogenase_GroES_domain_protein
7e63eaf4447cdd96e3e22446e0710fca	alcohol_dehydrogenase_GroES_domain-containing_protein
2b7afdb59dabf24977fc4cf457bdfbb2	Alcohol_dehydrogenase_zinc-binding_domain_protein
875932453cb1cfe37656d001fd0293b8	Alcohol_dehydrogenase_zinc-binding_domain_protein
06eefe6b3d61164599d59eabec78926c	aldehyde_dehydrogenase
58161559add856066774f6777297c52a	aldehyde_dehydrogenase
762a109f972f48f652fc1ff88ef4a53c	aldehyde_dehydrogenase
bc5634176193c71e845326bc11766d0d	aldehyde_dehydrogenase
3e36d948ab2450a5783bf14fd440838d	aldehyde_oxidase_and_xanthine_dehydrogenase_molybdopterin_binding
45b24bd4d35683d6f6ef848f59e30ca4	aldehyde_oxidase_and_xanthine_dehydrogenase_molybdopterin_binding
b29c14e220e937a05d79edd04cf49f29	aldehyde_oxidase_and_xanthine_dehydrogenase_molybdopterin_binding
eeb1a95c8059b6e998ff766e806f5068	aldehyde_oxidase_and_xanthine_dehydrogenase_molybdopterin_binding
4a42e5abb1f72f5fa0d82547516ae839	aldehyde_oxidase_and_xanthine_dehydrogenase_molybdopterin-binding_protein
4c828317605f9be3a9ae40e10b3726d7	aldo-keto_reductase
edc351e9714d02913c31c6ddaedee004	aldo-keto_reductase
f9f1a7bd51b4e8d89acaf9336c0317f4	aldo-keto_reductase
069a1c5c68fbf86a96b4d21b3fe77d3e	aldose_1-epimerase
894817328d0bb4b0376f77d82d1a3b93	alginate_O-acetyltransferase_putative
aa7d099867fa6a0abb2c8509e3783191	alkyl_hydroperoxide_reductase-_Thiol_specific_antioxidant-_Mal_allergen
ba997e1973b68d548b8e1dbb205ec385	All-trans-retinol_1314-reductase
0cce1f01b149e60c97c019afc4f5b4f0	allantoinase
0447e39c02349f2e0c16061c71b12294	alpha_amylase_catalytic_region
9d2c786b2ba9721afbc6598ea984e46a	alpha-12-mannosidase
0f13c944c657924cf40d66525a74165b	alpha-16-glucosidase_pullulanase-type
167fcd7cd701d4040d6051cd799c81c9	alpha-2-macroglobulin_domain_protein
e2d30266c005f5a7ec56d44e7770ed0a	alpha-2-macroglobulin_domain_protein
d578035a374c9bdf1c2bd83b22cf961d	alpha-2-macroglobulin_domain-containing_protein
7d2112e270d02c9476b3be0f20dc1748	alpha-amylase
fabb8e9c17e8a26743e82c3a853aa652	alpha-beta_fold_family_hydrolase
9a7530559e18bfdae4ef34da93253ba3	alpha-beta_fold_family_hydrolase-like_protein
c62804e6ff34dbeac3be8b4bae7057ef	alpha-beta_hydrolase
8d8916718ae55c3b9cf11a1023f84eab	alpha-beta_hydrolase_fold
991331f73014965a805b3d6d4f1338ea	alpha-beta_hydrolase_fold
a7524e21ad067a8db03e4d71143d514a	Alpha-beta_hydrolase_fold
cbb11fa9d0ed0bf611ae712a1e284066	alpha-beta_hydrolase_fold
5ccb35c32feaea654f0472ae239487e6	alpha-beta_hydrolase_fold_protein
942ab5b0f82dd11baf60a4748646330f	Alpha-beta_hydrolase_fold_protein
d0fa520c6b8a1f5688b77246c6b2e6be	alpha-beta_hydrolase_fold_protein
d3f79fc70f79d0e09662d96def25178f	alpha-beta_hydrolase_fold_protein
029f70cfbe89345af4033803c77c4ddc	alpha-galactosidase
e5774e43f8b4a07703a2a852f2320788	Alpha-glucosidase
fbcaf017530d64fd02339b2f267769ae	alpha-ketoglutarate_decarboxylase
2b7f47a1af60029a90ef69c17e490c7c	alpha-L-arabinofuranosidase_abf51A
46dde7650d9cf315f17b95c86eeee2a8	alpha-L-rhamnosidase
239bbc3cc112015598fc9890520d109c	alpha-xylosidase_YicI
d28cb3760efc4f92e9eeb4b3848027df	Alphaalpha-trehalose-phosphate_synthase_UDP-_forming
7a6fd95e7e70ae94e1cb2e15486171a2	Alphaalpha-trehalose-phosphate_synthase_UDP-forming
d16cd363ca4a4f64fce678c37b7f2d4e	amidase
2395f98edc90b0ef993df499d9094e2f	amidohydrolase
2f9b386a25b05ff091713d34b13d442f	amidohydrolase
3bae2b1e8580ba30229ed6c64fc037c6	amidohydrolase
3c13135e583c1114c9cd861c195c3a35	amidohydrolase
404a699625ff29e1fee0025faafcaab3	amidohydrolase
a838113e41f02dca66da3d4aa87d9720	amidohydrolase
bf27803a78aa2101a821cf95039355da	amidohydrolase
d1104d8251a0948339853a7ba1024c22	amidohydrolase
e8b3e50865b139beb0e2bc78c18ffaef	amidohydrolase
ecfc5227848a59c3cc288c9444dae4da	amidohydrolase
13944f76c1acda59a4a59e1e00a00881	amidohydrolase_2
fa4b3af58f26f60ee59be9b6e8185e29	amidohydrolase_2
36bf55edd8b4eddca347f94ced0821e7	amidohydrolase_3
4ee459a3acfd6b4baf2dc4e50c325936	Amidohydrolase_3
0ccf84269df23a284e547dfb6235d508	amidophosphoribosyltransferase
4f88ea258051900bc89187635272608a	amidophosphoribosyltransferase
32e153cfdea4280392af36dea9f2919a	amine_oxidase
f1709ccc067a592e4678c5f6bd44823d	amine_oxidase
30b209a99da47d6822ad64892893a6a9	amine_oxidase_flavin-containing_superfamily
1437b1ab03d0563a7345dabf681274e0	amino_acid_adenylation
0434407c7a9c62c1cb39ae9a0346afc5	amino_acid_permease-associated_region
a3dd5e15e99cdefcb3f55216546eabfa	amino_acid_permease-associated_region
fbbdcffc168ba378b97437e327aab916	amino_acid_permease-associated_region
1a31200902e4eced8a4d870ace2515b2	amino_acid-polyamine-organocation_transporter_APC_superfamily_TC_2A3
a0467d2d09711e2dd85d5a4927bec5d3	amino_acid-polyamine-organocation_transporter_APC_superfamily_TC_2A3
8e1f033f0df743cc830619e07e5e1d09	amino-acid_N-acetyltransferase
2be26b05a9a59d0ae759748886d8f81d	aminoglycoside_phosphotransferase
e42651d5e80ec20d7683983ddeb194db	aminoglycoside_phosphotransferase
f5c3e1a159310fa8310c9179c996382f	aminopeptidase
0b5cc6527e629951b4c120da8158040e	aminopeptidase_N
2163845f38cb97217f15d6e4203022cf	aminopeptidase_N
49c2f21b40ccce1d54040ca183af1681	aminopeptidase_N
1155638a3caca39c9847fde712860167	Aminopeptidase_N-like_protein
b4b0f44539bd39b17e3454b2cdf40481	aminopeptidase_S
80afb986a7d362642a69d773a84a2e7a	aminotransferase_AlaT
1811fa8adf7509a185f8124e11171559	aminotransferase_class_I_and_II
80915572f0b4e2fae51e9f00efe41c9d	aminotransferase_class_I_and_II
a69a731c367ccb84d461c84d7b33d592	aminotransferase_class_I_and_II
bb2afd9fe01b45a3e0265325eedf993f	aminotransferase_class_III
0e3b8cb4917d63efd1129f4289772ea0	aminotransferase_class-III
1584db272969dd53a7da799a1f6d394a	aminotransferase_class-III
6625255afd565c130df8a1dd3169aaa7	aminotransferase_class-III
bfd48cc5408f4e8e1cb078e01ff3706e	aminotransferase_class-III
05721a006592680eb9c8039367d4acd1	ammonium_transporter
8faae69baac794b6aaec77f8f947d722	ammonium_transporter
c19f3c765a1e60a75122d3cb5b0041a7	ammonium_transporter
4fed04f3581cec95f56b8815d1084df5	AMP_nucleosidase
d7d1caec380936e81e53afa4fc882f11	AMP_nucleosidase
0fd463fe69421741c992e7cbe35979e7	AMP-dependent_synthetase_and_ligase
26ed9c366b3a8e5a66852a890b5382d9	AMP-dependent_synthetase_and_ligase
2948ff042f116d767e9cc35d7e32e178	AMP-dependent_synthetase_and_ligase
2f73e5506d179d28d353593944396e7b	AMP-dependent_synthetase_and_ligase
32948666f75a4c8b3f991af6ccc92a3c	AMP-dependent_synthetase_and_ligase
6de7c3bcf39f3f3cd184baa04265e4f1	AMP-dependent_synthetase_and_ligase
fea8e7fe7312ce866827486ef8ac32b8	AMP-dependent_synthetase_and_ligase
e5afc20a68501c451348bab1f132f29e	amylopullulanase
13358e52c01548d6a4bdfb0d66a73202	anthranilate_synthase_component_I
431b48c717424f9f48e67253024a5542	anthranilate_synthase_component_I
1ad255c4a5c60afbf281cf77a1cf15cc	Arginase-agmatinase-formiminoglutamase
cad30afb56b689a8c5955a5da1e3e042	arginine_decarboxylase
25081033103c101474e980bc0c92f8e9	argininosuccinate_lyase
7fad37e99987a36c86f8fe8035af5994	argininosuccinate_lyase
ae2d51a85f308ca307715810ecceee07	argininosuccinate_lyase
0f87aed0156d60e5b0fa7cef43c7e827	argininosuccinate_synthase
202876eca9d4e3cca422155475785e1b	argininosuccinate_synthase
5885c04aab38153defce0b3ab9000ff1	argininosuccinate_synthase
70c90e2e18486e58aa652a7cacd1da43	argininosuccinate_synthase
de5ddd8391faa999eb190b976a9ff149	argininosuccinate_synthase
365a4748b2384e19da5b85a7071a5f99	arginyl-tRNA_synthetase
b49db33403f5595ef725049856b6f705	arginyl-tRNA_synthetase
fe1c4ddf34ab17a70b839a32b2d245fe	arginyl-tRNA_synthetase
6aa44b3bf86350bc963ce1dbc170268e	arginyl-tRNA-protein_transferase
0ca241053976e6b7bbf96bd850fac3a7	aromatic_amino_acid_aminotransferase
9079cefa4f53121fb8b75aefd515142a	aromatic_amino_acid_aminotransferase
094b476fe9d290c8f3065818af26eae0	aromatic-L-amino-acid_decarboxylase
16b93df75f86488ca2c7319708788162	ArsR_family_transcriptional_regulator
a3b81ada116ccf806451e815d19783d0	ArsR-family_transcriptional_regulator
95720f551a703249ba73e5f414a34b80	aryldialkylphosphatase-related_protein
3abd3195b5804d451d0784937ea86f1e	AsnC_family_transcriptional_regulator
8ed6f96c4af374ca9e667b8e4c2c0f13	AsnC_family_transcriptional_regulator
030fd2d655aa3510b151c41fa122ac85	asparagine_synthase_glutamine-hydrolyzing
2ff3ab8f76f00865c8bccbee2dab2a24	asparaginyl-tRNA_synthetase
014c0878c9b540b35e861a15c357dfbd	aspartate_aminotransferase
47763095fb49ac738a4e6fbc942d7c12	aspartate_ammonia-lyase
c20ff0086f5ae09f0e9827a726b0b01c	aspartate_carbamoyltransferase_catalytic_subunit
9937f4985c367ebaadf8b0ed2bacfdbb	aspartate_kinase
efe4b149ac63ec0b6f2e008a84362cc9	aspartate_kinase
ff9f9581bf741293a29f7e3dfec54b7e	aspartate_kinase
d12ff5ad45129e589e048b30cccc71db	aspartokinase-homoserine_dehydrogenase
0434238500371733052efe191aa17761	aspartyl_aminopeptidase
c84563c02d2f2472d9e7da4c36f40f30	aspartyl-glutamyl-tRNA_amidotransferase_subunit_B
20761e589004ace5ec9031ab6797a73b	aspartyl-tRNA_synthetase
4c1fa09cdaac4c52502dc66373081c98	aspartyl-tRNAAsn-glutamyl-tRNA_Gln_amidotransferase_subunit_A
2fedfe62c9b6f4891ce6f1728b74ca38	ASPIC-UnbV_domain_protein
79239da4eb0642e0a8dd84bedef36e8b	ASPIC-UnbV_domain_protein
c44efbd85ca90869461e13ef8bcbeafa	ASPIC-UnbV_domain_protein
dcbd10a4a4db9f2b6fcb004c017d059f	ASPIC-UnbV_domain_protein
83f71e8a147012e3d3e39be894718008	assimilatory_nitrite_reductase_NADPH_large_subunit_precursor
cd85ba600a6c1ae0076f99a6d90c1965	assimilatory_nitrite_reductase_NADPH_large_subunit_precursor
dd2a44bb930f928b7adf80dcc90fd093	ATP_dependent_DNA_ligase
f2ae2fe5c76fda59a6b7b0c5f9bee3d5	ATP_dependent_DNA_ligase
8d2d183a7ed320b4069ddac0b60c05c9	ATP_phosphoribosyltransferase
2f1bcf97b69122f915cea6391e339282	ATP_phosphoribosyltransferase_catalytic_subunit
c3fc6dbedde268993c6f360617f5bec9	ATP_phosphoribosyltransferase_regulatory_subunit
6db60062f270ecf0094940dfd1c83fd1	ATP_synthase_alpha_chain
8fa0ecfd9a996f915e6ff64a86dda6a3	ATP_synthase_F0_C_subunit
a70d25790b0481ea8270e913d6cc9f66	ATP_synthase_F0_C_subunit
ec4118fe0b20ba637cc1c0f22df62c2e	ATP_synthase_F1_alpha_subunit
0e169b83f0198ea66285c6f108386078	ATP_synthase_F1_gamma_subunit
36de07c4c46388fc9b847331aa3b1960	ATP_synthase_F1_subunit_alpha
e5f582ffe5e4e57fa99d92dc21695402	ATP-binding_region_ATPase_domain_protein
1f7ed40fede94b827b32705516ee96ac	ATP-binding_region_ATPase_domain-containing_protein
f098eb0ed7d0e4031ea63a1fefa97ad0	ATP-binding_region_ATPase_domain-containing_protein
072f529a47ede44bfa93142f787608d7	ATP-dependent_chaperone_ClpB
5fb14071021af6548a4a4e4596524e90	ATP-dependent_chaperone_ClpB
ad2f13662732a5a294f0f44c93878955	ATP-dependent_chaperone_ClpB
f1610a11a786ce1b99b9515abd93e771	ATP-dependent_chaperone_clpb
168cddbcf646f6fcbe8fa51558f7e451	ATP-dependent_Clp_protease_ATP-binding_subunit_clpA
1e6b3a82ce38f844cd4e2241563a449a	ATP-dependent_Clp_protease_ATP-binding_subunit_ClpA
2736f354f3b72f4b850eed8c49edc608	ATP-dependent_Clp_protease_ATP-binding_subunit_ClpB
9b16f330d228ffb65ead441a5c8615dc	ATP-dependent_Clp_protease_ATP-binding_subunit_ClpC
f04ab3ae4c73d02445ed2f804a342806	ATP-dependent_DNA_helicase
00f01a8538350ef90eba30d0427f509b	ATP-dependent_DNA_helicase_DinG
8c5b4f769fd4fcd2485142349cd37406	ATP-dependent_DNA_helicase_RecG
a51a4a3982c414add8973f90ce189c17	ATP-dependent_DNA_helicase_RecG
c4822ee49ccf4ebe4ad98c081c4a529d	ATP-dependent_DNA_helicase_RecG
dce06a4d15d187c8ff5a62ab4e45085e	ATP-dependent_DNA_helicase_RecQ
153bda3c3a4982b05e9e83fc14dc8b93	ATP-dependent_DNA_ligase
49ca981cd8d8770fc1585493b8d49e5b	ATP-dependent_DNA_ligase
6d74e9f9417e5f1bc489a5b6e9dbcf47	ATP-dependent_DNA_ligase
d4a90cb3262305ae7448bc36d38c7692	ATP-dependent_helicase
2f64667f82d9595444c83dc8c75c1466	ATP-dependent_helicase_HrpA
92dec1d46f797acf983fec67645b6ccd	ATP-dependent_helicase_HrpB
d4a365c76826ff29d9f41d52b28c5a50	ATP-dependent_helicase_HrpB
ca9b5a48206a8290330cf302f3533e61	ATP-dependent_Lon_protease
e768aac06a189d40f3c48d02daa6ae0f	ATP-dependent_Lon_protease
07cc1cac8daf2ac9a4301af8545cd48c	ATP-dependent_metalloprotease_FtsH
0f6b3ce12f3908d5d8aacb38773fbf44	ATP-dependent_metalloprotease_FtsH
3e42b11c1853c5eb7ee982d84380d2c8	ATP-dependent_metalloprotease_FtsH
335ef8444d2ea142b94b12f0ec1afa28	ATP-dependent_protease_ATP-binding_subunit
ca3cc6ef91b4dee51e8419ef2044b0ea	ATP-dependent_protease_ATP-binding_subunit_ClpX
e1ff5edc976d23b999b9ae37d250cb4a	ATP-dependent_protease_ATP-binding_subunit_ClpX
1579ee3a71633b13d306941c75ac79fa	ATP-dependent_protease_La
64151007405674ed3fa56258bf90c864	ATP-dependent_protease_La
8151b3377b22b8686099ee43f2e607de	ATP-dependent_protease_La
9d072848ba2f2fbbf3a6ceb5b93471b7	ATP-dependent_protease_La
a78c07bd58fcd1500b44545ad2359421	ATP-dependent_protease_La
02bd6c9521a60d3fde609a3f6b4e9177	ATP-independent_RNA_helicase
84a20243fa35281c0242b6f1dab52978	ATP-NAD-AcoX_kinase
3496373751c437a099f9b7eed6392916	ATPase
6199827e844959509bb7668c654a71f9	ATPase_AAA_family
e4858c38faa8e30b0c5c07c83ecb71f0	ATPase_AAA-2
916d8b605547ceb5d5a1e9f19e966814	ATPase_AAA-2_domain-containing_protein
616b302d7dd3390b01bc765a145d287b	ATPase_component_ABC-type_dipeptide-oligopeptide-nickel_transport_system
24965c4a1d96603c454203279d4672ff	ATPase_domain-containing_protein
8ed6d840b1b74e7c4f4527920b6544aa	ATPase_FliI-YscN_family
107d1cad0e7e5587cdc9741d18ca1a3c	B12_binding_domain-ArgK-methylmalonyl-CoA_mutase_family_protein
3d278a6cf05910d5de2404466673d9b0	B12-dependent_methionine_synthase
3d2daf2d5280670d34f0807b09b353de	Bacteriophytochrome_light-regulated_signal_transduction_histidine_kinase_PhyB5
1c3ba627cb973bbcbaf58b811e4c46ba	band_7_protein
411ad0fc740eea72be629e4324130d31	band_7_protein
d85040f38fa34388dd333b5d13483082	basic_membrane_lipoprotein
109490d6c7870bea306e4bf155c36b59	beta-D-glucuronidase
321e2bcd0bc5124fd10ac0fe3596f095	beta-galactosidase
5f6376c1d680062a8eb92160bc3d2d0f	beta-galactosidase
8789065840458c7c8b842439a0758e09	beta-galactosidase
c1c040fe0504cfa0e410c65f0638b82d	Beta-galactosidase
aaee9e1bd69cef52dab1b622052c5ae5	beta-galactosidase_putative_bgl2C
28bd89d1e0ed25d90cc55e97e6d666a7	Beta-glucosidase
5f544497430083ea54caf0cb6b8e93e8	Beta-glucosidase
79026713bb3f665bbbcfe2cd97646ae4	Beta-glucosidase
a1432e13fe872e9ea771d4d313ab4359	beta-glucosidase
b524a7fcd4cc7d1b8d2e0ee232a49c84	beta-glucosidase
cb16cd4902f818ecaae061d704281196	Beta-glucosidase
1fe96593acea46fe2f46ff64586d9dd7	Beta-glucosidase_Glycosyl_hydrolase_family_1
83600b71ff22faccd3ec827e98221b11	beta-glucuronidase
24bffc5ad71f6d8a735d5322b024b1a9	beta-ketoacyl_synthase
4dc0df8c388539355122b2090ee3bf95	Beta-ketoacyl_synthase
33784324420bd00734b25599a0fc7a88	beta-lactamase
430c531a105c170df4e1d962a4625882	Beta-lactamase
ae25e411f52c59b840977243d3f65bae	beta-lactamase
d8bee94436028b268ea95d0e5c258f83	Beta-lactamase
2d41ee60f66f8e4ac2dbe5940de42c10	beta-lactamase_domain_protein
2e691acd3c35ea2422960ac3009ac3ec	beta-lactamase_domain_protein
2d52e6c91bf0b84db12a52ed5b72ab71	beta-lactamase-like_protein
d7729ddd542f8a5f4ab585760647bc3e	beta-N-acetylhexosaminidase
4eac47f1ff29f842770d4e3461fbe629	bifunctional_aconitate_hydratase_2-2-methylisocitrate_dehydratase
978e21f5e760034c502a24b9d1b7a678	bifunctional_aldehyde_dehydrogenase-enoyl-CoA_hydratase
5f4b719ed3a3b149844b0e66c568454a	bifunctional_deaminase-reductase_domain-containing_protein
1b115937d4d9ce364ba519436d3d03eb	bifunctional_homocysteine_S-methyltransferase-510-methylenetetrahydrofolate_reductase_protein
55d3418301f90a05a88f112cd3d2bf95	bifunctional_isocitrate_dehydrogenase_kinase-phosphatase_protein
72a116af44b0c5fb0f5c209ad19bcdae	bifunctional_P-450NADPH-P450_reductase
4b1c25f919980a5a418124b655d6671b	bifunctional_phosphoribosylaminoimidazolecarboxamide_formyltransferase-IMP_cyclohydrolase
c9c2391e6daa782581e0534a5139a5be	bifunctional_proline_dehydrogenase_and_delta-1-pyrroline-5-carboxylate_dehydrogenase_protein
74e3524fe0c9f02a817f2af3d2bf8d27	bifunctional_proline_dehydrogenase-pyrroline-5-carboxylate_dehydrogenase
63835ac9ea40ab763f6b6dc0a775137c	bifunctional_riboflavin_kinase-FMN_adenylyltransferase
083746b64ee15ef515cae1b98b0e4245	binding-protein-dependent_transport_systems_inner_membrane_component
3810bdbc60b75d0e6f3b6e690a66de3f	binding-protein-dependent_transport_systems_inner_membrane_component
78dd77727e3dd9a84c519fbf02d8f1e5	binding-protein-dependent_transport_systems_inner_membrane_component
93e6b1300c942e152d7b527c034c7d14	binding-protein-dependent_transport_systems_inner_membrane_component
b95471d7b9cd432a7bb8420bbf6c2db1	binding-protein-dependent_transport_systems_inner_membrane_component
d5d9e8249c34b8acd1663b2ff7a1ad4a	binding-protein-dependent_transport_systems_inner_membrane_component
ef226f02181925ee26c10d6ff738b85a	binding-protein-dependent_transport_systems_inner_membrane_component
ef882191c87a14e428ec973e26e45d63	binding-protein-dependent_transport_systems_inner_membrane_component
38d6491ee20b6e0944580de214900389	binding-protein-dependent_transporter_inner_membrane_component
b84fd42d765ac324758441db867b3acf	Biopolymer_transport_protein_ExbD-TolR
74addb7c73e2b22a7d749d4e68e7fc13	biotin_synthesis_protein_BioC
0746e239cbb1bd174afc8953f56620ce	BNR_repeat-containing_glycosyl_hydrolase
2d5b56823672119d436da42cb33fe7cb	branched_chain_amino_acid_2-keto-4-methylthiobutyrate_aminotransferase
219962ab8b04ccc4fc133659b68a1705	branched-chain_amino_acid_ABC_transporter_periplasmic_amino_acid-binding_protein
52d35affd1672069551719a1db58e6e5	branched-chain_amino_acid_ABC_transporter_permease_protein
1e43da77e46cecbd5fb8841f9757d1ff	Butyryl-CoA_dehydrogenase
2dc2196807373f01dc5b1974863c6a3b	butyryl-CoA_dehydrogenase
4d9aa48a3fab06488edfe8f4401724d1	C4-dicarboxylate_transporter_DctA
c704fee45dafe93fb6ba34a8e6ecb1ba	C4-dicarboxylate_transporter_DctA
d4398024bd2daf4b3dd8e36e8606003b	calcineurin-like_phosphoesterase
6b8baef25ffb0f822d99887508692d92	capsular_exopolysaccharide_family
4ee46654662d6c438a14d9edefdbe7b4	carbamoyl_phosphate_synthase_large_subunit
61d48b1a43f60ee069b3589d7afdcf55	carbamoyl-phosphate_synthase_L_chain_ATP-binding
ea11e15007b9a136976bfa0e4425a4b1	carbamoyl-phosphate_synthase_l_chain_ATP-binding_protein
ca7b70546f2455fa794f228ab2142b4c	carbamoyl-phosphate_synthase_large_chain
064efe9aba14690a1c0d035ee33ecf3a	carbamoyl-phosphate_synthase_large_subunit
37f12694094c35aad1b345db108321d9	carbamoyl-phosphate_synthase_large_subunit
54dc6e55d4343922ba2ce77c10095d66	carbamoyl-phosphate_synthase_large_subunit
850fca7edaa7c72fe0e8d3358c8dfc87	carbamoyl-phosphate_synthase_large_subunit
afad5803f968c88fdc323baa6784fa57	carbamoyl-phosphate_synthase_large_subunit
3bbf1f7d060ccb6e744dc1eb57688e0a	carbamoyl-phosphate_synthase_small_chain
0de6047fee8610bfc713284a1357de17	carbonate_dehydratase
6f9e63c408ef7ed23addaebcd670255b	carboxyl_transferase
4b0f50b4529f8509c990c5937b250a4d	carboxyl-terminal_processing_protease
1753ed31f9f363469890bf0fad38ca76	carboxyl-terminal_protease
a2479d2935ec92ea0f29bbc4096bef70	carboxylate-amine_ligase
09c0a6b31fba6ff8fca7345562a6e071	carboxymethylenebutenolidase
3f35febd5f6569e36eaad8bcb7ae8636	catalase
87bbc740a6bea8ab78fa40dc38b3b1d5	Catalase
d2b4146a4273c79f98567a91d7711070	cation_efflux_system_protein
8c98f561b6e786b4c4d7d1aebf223f19	CBS_domain_containing_membrane_protein
2eb8d16e4843f643dc692ba72600033c	CBS_domain_containing_protein
8bb129cda20f936251e9b37d36db556e	CBS_domain_containing_protein
dfc4582af8268ac63c14fef24c6d61fc	CBS_domain-containing_protein
3c196bc98e62de75bcbc2bb8f6946647	CDP-6-deoxy-delta-34-glucoseen_reductase
9fbcdfcc251a2823db13f37ed111e2b8	CDP-diacylglycerol--serine_O-phosphatidyltransferase
6d6bf484d943863e52a7ca4aaf5cc54c	CelD-like_protein
0513985bd6e1216845335d018006d8ab	cell_cycle_protein
e100188f77198cdf10293cd012888238	cell_cycle_protein
0eb13ec8bbd659da7e986ca88b251db5	cell_division_protein_FtsA
bb33e059a5b3bb5f4ccd51f8bb13a297	cell_division_protein_FtsA
ce11f7ffb53d97e8abdb2cc08a728a80	cell_division_protein_FtsA
5a1974ef394c8a038b4c7f1d6c8bbc90	cell_division_protein_FtsK-SpoIIIE
b1936ffcfc2bddf2ca353426043ceda7	cell_division_protein_FtsQ
343f1dbbcb8c2aa5d5ddc7c9c3b94ae4	cell_division_protein_FtsZ
4a91f355d0f78e70b9a8891cf3316483	cell_division_protein_FtsZ
88f3caa8f0664ca4f1c40005908fd164	cell_division_protein_FtsZ
cbac26a3d44d205b32794c5fddc2df95	cell_division_protein_FtsZ
1d6166de3bce880ca4160737a4e99e68	cell_divisionFtsK-SpoIIIE
5a2040f6ed7b0a79a4f0345102672c32	cell_shape_determining_protein_MreB-Mrl_family
2b793ef4c4f4453cd6cb8e5aab43b3a9	cell_wall_hydrolase_SleB
8d5af518b06742ed217e73a069460388	cellulase_putative_cel5F
7afcc7f1472f53a2ef362dd69e1470eb	cellulose_14-beta-cellobiosidase
1fbb2498f68805de1a8b1e7475e3c363	chalcone-stilbene_synthase_domain-containing_protein
d4df2d36d36c03672493221af6822451	chaperone_DnaJ_domain-containing_protein
13600c602467454ff3ed7d741688f4a7	chaperone_protein_DnaJ
ee55dc8042b86063bbae077b87c888a8	chaperone_protein_DnaJ
8c934cc29047532ac69d89effebf1965	chaperone_protein_DnaK
aa405fad106cc47e406dbae3e772ce30	chaperone_protein_DnaK
b2f90c91386163c9fa4bc2a1019abfdf	chaperone_protein_HscA
d13991ecfdd91ff736aad78d1dd80733	chaperonin
1de83a94d21a8e642c35a14aa1d7538d	chaperonin_GroEL
2bfcd2c6ed97c20e5eca346369382505	chaperonin_GroEL
5d72b7985bfb569b2ba32d7796d2654e	chaperonin_groEL
8c3bb9ff6850fbd2a4e1d8bc02f95740	chaperonin_GroEL
0b6b859f04b56aa8a972311b4b4f04ac	CheA_signal_transduction_histidine_kinase
9bcda17fa96a6836c3cb35cd63197c9d	CheA_signal_transduction_histidine_kinase
468e139e4241a9c5a968e391f8c9ca55	chemotaxis_response_regulator
7b2aebef75e3aa6b874c83cf0ed38ad9	CheY-like_response_regulator
34e6dba739d1e945b1a3a22c4539600d	chloride_channel
5f87b71ad6bb53711afc6e6806636ada	choline_dehydrogenase
f363b3b4e9a1e683101ef5badf3d4fe9	chorismate_synthase
70b1df30ab2f572742d33bff026e36ff	chromate_transporter_chromate_ion_transporter
e82d5280614355684a0f7e175cc2f97d	chromate_transporter_chromate_ion_transporter_CHR_family
1bba640cc23445129fd91bb3369ba864	chromosomal_replication_initiation_protein
a70a3f1c9753318e891f7cad4b13b923	chromosomal_replication_initiator_protein_DnaA
e10623942acfde17b40bb94a5d8262f5	chromosomal_replication_initiator_protein_DnaA
3a4d164b97471627eb145c193c2033cb	chromosome_partitioning_protein_ParA
cfb58e17e72c56ddc857aac2070e78cf	chromosome_replication_initiation_inhibitor_protein
20a98fb08902a51a42e684370cdf31cc	chromosome_segregation_and_condensation_protein_ScpA
512248f90e125103ff4d85a4f0b6d9d2	chromosome_segregation_and_condensation_protein_ScpB
2a32a1677452b9773beb18fa262842ad	chromosome_segregation_protein
018bcfbcc15312cebd8544acd47fbfac	chromosome_segregation_protein_SMC
1073dfc23864861949f2c342f9908e16	chromosome_segregation_protein_SMC
7892e177a768775bde5096d6448dd2f0	chromosome_segregation_protein_smc
ffe92e445fb4fb74a95ab4c8f657146c	chromosome_segregation_protein_SMC
240173c58eef66989ef021fdef0efda7	CHU_large_protein_uncharacterized
aa8b52aaf7b0775808673ead14300564	CinA_domain_protein
6828ba4693662aa0aad294be12365b0e	CinA-like_protein
3674c06a05f9f226756b786bed622541	citrate_transporter
fbccb872cba307796571eada1af9d531	Cl-_channel_voltage-gated_family_protein
c86c8626b6bdba956bf9b494e79de056	CMP-dCMP_deaminase_zinc-binding
b1ec3b624432899892169514e36fb843	Cna_B-type_protein
8ff7326be98d97adb4060ee39eaec6b6	CoA-binding_domain_protein
5abdceb403eefbcd9cf0685960a4bb03	coagulation_factor_5-8_type_domain_protein
2a1a117d6b1454f1579c18bb4c77f77b	CoB--CoM_heterodisulfide_reductase
af63ce4c07b160d6294fef7d45c4aaa1	cobalamin_biosynthesis_protein
5cca4c608f8a141426556f4cd1c83cd2	cobaltochelatase_CobN_subunit
4b17a0b121c728a3958e216f8c11e179	cobyrinic_acid_ac-diamide_synthase
4f2fcf7990261b629c5a88ef270df982	coenzyme_A_transferase
6c79f598192dd72b74b2f5a0f6f8f5b7	coenzyme_A_transferase
97383266e12e45e7ba561f2745fc6f20	cold_shock_protein
ee4064dcf84f0a3700d86a56d76013c7	cold_shock_protein_CspA
b6d82567da283a9adab717b68df4080f	ComEC-Rec2-related_protein
550f3799663a3d4b06dcb3575ce1392d	competence-damage-inducible_protein_CinA_C-terminal_domain
1006df746e9e889d84f3b1bc992517b4	conserved_hypothetical_protein
21fb1159fc3f294dbbda7a44abff5854	conserved_hypothetical_protein
36e178ecb1a59dd55814ed6dd60cea53	conserved_hypothetical_protein
6a23ec55a6111acf0bf5a78537c7d719	conserved_hypothetical_protein
8857819c01c76c3f9f5c1c3e35e2d2ec	conserved_hypothetical_protein
52c726fa3b5cad47125206c16dea2a2f	Coproporphyrinogen_dehydrogenase
168d7270dd135a907e8e6ce3d2c606b5	crotonyl-CoA_reductase
74d11bcb1c5b61065b7c0dac9016321f	Crp-FNR_family_transcriptional_regulator
7ba48762f204e77c3f976b461fe75630	crp-Fnr_family_transcriptional_regulator
c54299c76d58b5b7029800c0ab6be8a8	Crp-FNR_family_transcriptional_regulator
4b35b919b6aa34643772deaef936d51c	CTP_synthase
bda6aaaf7b52357a9941f6d0bad5c6b9	CTP_synthetase
f76aaa99e9ea9604c3cc1603524e0ca2	CTP_synthetase
dde5e1cfe946e1efa4aee261db35b27e	cupin_2_barrel
9bad6049f6beba6db6344d28ed1d5418	cyanophycin_synthetase
ddb7f1757371b0f5498f396a7d2d3081	cyanophycin_synthetase
c7c4d359d21cbea48b6b8d3f734ddc92	cyanophycinase
4a8cd57130b3ec965eb4372bf2c03824	cyclase_family_protein
851ad2c5931a5d6113278482125095f2	cyclase_family_protein
a7784f49ddc1aea7804c274f0db94883	cyclic_beta-1_2-_glucan_synthetase_putative_cgs94A
1497d0b55707c96e4aab27c6460cdec6	cyclic_nucleotide-binding_protein
0d9ce2bff2ff83c390c25b95a24b06bd	cyclohexanone_monooxygenase
483bb7d6b4445c7cbf481d961a871ded	cyclopropane-fatty-acyl-phospholipid_synthase
e47a117a712e314d5ed333d3b762a960	cyclopropane-fatty-acyl-phospholipid_synthase
e78583ec2e6d8acb7b9bd7b667f2b64b	Cyclopropane-fatty-acyl-phospholipid_synthase
761131beec051648b8efd29033435a00	cystathionine_beta-lyase
ad08d11c11289f3df50d4c4bbba173bd	cystathionine_beta-synthase
05e17fe02c345302938956ef0f8af353	Cysteine_desulfurase
e666518098cc0b5cf434e4138d62beed	Cysteine_desulfurase
fe266b8b483936fb1eebc1f895b5b96e	cysteine_desulfurase
7199616c8262e80494cfcd0454571f5e	cysteine_desulfurase_SufS_subfamily
c54e231d1d2515d0f5d3bf416e86b423	cysteine_synthase
25cb120e44e5be07a25bc3749cd6af8c	cytochrome_b-b6_domain
1b5e048125b297ccc04e09e68496ce58	cytochrome_bd_quinol_oxidase_subunit_2_apoprotein
3ea7098c76105e8d8e2df80521a29a57	cytochrome_bd_ubiquinol_oxidase_subunit_I
b65939699c377023b906eb5485c4306f	cytochrome_c_assembly_protein
291b2f7ab0b6eea22f62d4b125a82412	cytochrome_c_class_I
4c758e5352e021fe04b0da4138e70dd8	cytochrome_C_family_protein
9ea4bb1e6f337cf427a5d07d6d9490da	cytochrome_c_oxidase_subunit_I
ec65af164fae9c56ec122e67f35bcca0	cytochrome_c_oxidase_subunit_I
9b011846c79a3e6d0078650de00941e1	cytochrome_c_oxidase_subunit_II
ff8d003ca1b3f44b22881ad53541d419	cytochrome_c_oxidase_subunit_II
7653a30f862d030b12704751c0efe883	cytochrome_c_oxidase_subunit_III
ec6fb5b1f288dd6f9e6a15c1b7add0ab	cytochrome_c_oxidase_subunit_III
a694d5a370db84bfb686c719381bfca2	cytochrome_c_oxidase_subunit_XI_assembly_protein
50f94a7dafeb2718f8e12301bbdae5d2	cytochrome_c-type_biogenesis_protein_CcmF
742cc31978c1da70877b536651a53028	cytochrome_c-type_biogenesis_protein_CcmF
ba954b89d0a4095b65e7a025aecfda6b	cytochrome_c-type_biogenesis_protein_CcmH
be9120439f7c9bc4fad573032d1ac194	cytochrome_c1_precursor
7f3bc41cb98e219c3eb281959eb4518b	cytochrome_D_ubiquinol_oxidase_subunit
7d17727ea2573b0160984237bf218933	cytochrome_P450
98f30735170af38a468a5d933cc247f4	Cytochrome-c_oxidase
fc45875e8df6e3d472ce3f1224fe62c4	cytochrome-c_oxidase
34bc27d83217d363878034d124798303	d-alanine-d-alanine_ligase
4fe5eb835e593bf8e7b4eefe8ae3ff01	D-alphabeta-D-heptose_7-phosphate_1-kinase
aee29ecc5e92c7af7fad107c92d768d9	D-amino_acid_aminohydrolase
18839cf960845dd887d6ed16ccfe06f0	D-isomer_specific_2-hydroxyacid_dehydrogenase_NAD-binding
654dbb3620bf83d0c0ef9742dc706dbf	D-isomer_specific_2-hydroxyacid_dehydrogenase_NAD-binding
c0bf58f95bbf5c7a9ab38265aa3d7141	D-isomer_specific_2-hydroxyacid_dehydrogenase_NAD-binding
95768a0f5c7480e1ef7c30304e3ec0e2	D-isomer_specific_2-hydroxyacid_dehydrogenase_NAD-binding_protein
41cc051202db8b368caf0fcda612649b	D-lactate_dehydrogenase_cytochrome
660a6cd3ca846b2dde4ea512a12968a0	D-lactate_dehydrogenase_cytochrome
6a5fbee155da75732b1cc089e3597f2e	D-xylose-binding_periplasmic_ABC_transporter_protein
881ab9dcc94e53b820b4a39a119afd63	DAHP_synthetase_I-KDSA
222061bcbb424e84df0c87bfb2c415c1	DBA_gyrase_A_subunit_gyrA
d0044a1c167cd80face95d76da994fc8	DEAD-DEAH_box_helicase_domain_protein
e2f0e8132224c351618b82cc9311f7da	DEAD-DEAH_box_helicase_domain_protein
446fa69f45679050133678fac3b316f9	DEAD-DEAH_box_helicase_domain-containing_protein
d08c1148fba9e017c1c60506185cd711	DEAD-DEAH_box_helicase_domain-containing_protein
33e7ec9a7a43496ed11ef3b09dbc1072	DEAD-H_associated_domain_protein
4a7e9b0663c93c1664187d617e169d9d	DEAD-H_associated_domain_protein
7de3165931660d62090868986e07f0a2	dead-h_associated_domain_protein
c727ba18d18bb361badf6796bc10414a	DEAD-H_associated_domain_protein
f2531ec255eea97fd745e83bf84ff7c3	DEAD-H_associated_domain_protein
6e7c46da8f36031ba5175f3b5901092f	degt-dnrj-eryc1-strs_aminotransferase
d635161e70214b9abb14da7bca46fe04	delta-1-pyrroline-5-carboxylate_dehydrogenase
f2a46c8d920f61a1162cea7bc50c6479	delta-1-pyrroline-5-carboxylate_dehydrogenase
fd3783cc5855e6b12e152acd19a6c281	delta-1-pyrroline-5-carboxylate_dehydrogenase
bcfbe0a625599f41d1949c9ea1d800aa	Delta-9_acyl-phospholipid_desaturase
c82bddfe0ea8b53e656cc12583c05a40	DeoR_family_transcription_regulator_protein
2159bc32faf7557a146104ab65c3e029	deoxycytidine_triphosphate_deaminase
f0e7afb9672dab9bac8ee9e4d5d13ac1	deoxycytidine_triphosphate_deaminase
3b179750f46c0faf5a68004d081833a9	deoxyhypusine_synthase
a2f1800a3151ac5ab34c6b6cc8cb2888	deoxyribodipyrimidine_photo-lyase_type_I
a07050c3934531c1946d4ab2d6fe077d	deoxyribose-phosphate_aldolase
5d60221b6bfb254ea24af3f6327fb4b9	deoxyxylulose-5-phosphate_synthase
e0b3dcd95b418d60372c6a338b9a0707	dephospho-CoA_kinase
99534959d4c8ed27b56347dc7c9b091a	diacylglycerol_kinase_catalytic_region
be11902721d87efdc82c23ead91f225c	diacylglycerol_kinase_catalytic_region
dce19127dbfdd2a1846d71722f3ce6c6	diacylglycerol_O-acyltransferase
d908ffb7bb4d878b0c8821cf8fdb2691	diaminopimelate_decarboxylase
0c975f05a3366084e66aa542879bc2bb	dibenzothiophene_desulfurization_enzyme_A
9c534976eb15af77b96aab3c7657bf03	dienelactone_hydrolase_family_protein
1f0000d9a15e2d45108e65244890dc08	diguanylate_cyclase
8caed8609364d403afdb55e25b3c4da8	diguanylate_cyclase_with_beta_propeller_sensor
23c914b3b24d6101904149ffa143db78	diguanylate_cyclase-phosphodiesterase
82f425be8fd3392ac01f7dbc8fc52481	diguanylate_cyclase-phosphodiesterase
a8c8c52832d62204b623fbf21d709d99	diguanylate_cyclase-phosphodiesterase
cb1ba9851c12926694f4e3d57fd3c840	diguanylate_cyclase-phosphodiesterase
9c961b734730cae077db473fd3dcf6b0	diguanylate_cyclase-phosphodiesterase_with_PAS-PAC_and_GAF_sensors
3865278eb293fd7b6d4d0556497443d8	diguanylate_cyclase-phosphodiesterase_with_PAS-PAC_sensors
b753f79124c75b39920a522b7f960951	diguanylate_cyclase-phosphodiesterase_with_PAS-PAC_sensors
23da928b32713d37ebad5b90ced2d1b4	dihydrodipicolinate_synthase
5c4ca888bab06b83def17eb6dc2ee8dd	dihydrolipoamide_dehydrogenase
6c57564dde0a86230f81e38d5491ccad	dihydrolipoamide_dehydrogenase
833adaa2ea0893144e3ec551e182d1b9	dihydrolipoamide_dehydrogenase
c1114742331f415bab2636e7074666a5	dihydrolipoamide_dehydrogenase
dd84b5e4901618334f413a97428f9eb5	dihydroorotase
413f613349a0b747c5c3e26e47884150	dihydroorotase_multifunctional_complex_type
8e6636a82c27af53b6729e8ca56eff4a	dihydroorotate_dehydrogenase_2
04740edb7913cb079fc8cddd44ce1785	dihydropteroate_synthase
3217d6bd372899a61e23a61e680776f0	dihydropteroate_synthase
9aeb42171c72f4564ae7b494e0644457	dihydropyrimidinase
0834782ecb272bd374bc5ae6b7a3280a	dihydroxy-acid_dehydratase
b2c4688cc0bf65e271f1523a7d386b13	Dihydroxy-acid_dehydratase
e8d77feac21fc090ba4facecd119f3e6	dihydroxyacetone_kinase_subunit_DhaK
3118b7deea46753a3102f6a52b7082b1	dihydroxyacid_dehydratase
645b00d6f939bb4844e60a8292ab2b6f	dihydroxyacid_dehydratase
f2947f6b82572c8445b0171319855c5a	dihydroxyacid_dehydratase
d7519d96ea5b4d15bc9c2f91c2f319a5	dimethylallyladenosine_tRNA_methylthiotransferase
00f419dadf3d4514b22083ef5899548a	dinucleoside_polyphosphate_hydrolase
84d68c09e809d5549f07c67eb8eed7b9	DMSO_reductase_chain_A
4d847d1f1c53e5678052ca474870d13e	DMT_family_permease
feac0800ca29188f06020ff13a2bc419	DNA_alkylation_repair_enzyme
23dd686af8723dacb6b9fa8edf966794	DNA_binding_domain-containing_protein
c03b38d0f33d290f6bb3295aff037047	DNA_binding_domain-containing_protein
6837512bfbf3b122b94d3fd771ddefae	DNA_glycosylase-AP_lyase_H2TH_DNA-binding
6e91ebb5f3857a78d491c1ec5210c121	DNA_gyrase_A_subunit
718adcfce0fefb82a80d81d2e325f413	DNA_gyrase_A_subunit
7ec5a0e9b43df3506985becaddf0456e	DNA_gyrase_A_subunit
c918216e28381391a06c4f3242129c42	DNA_gyrase_B_subunit
d1afcdfb4d1dd7571d1a7955e6faf858	DNA_gyrase_B_subunit
2a9f30f75c44ef0e5802deaf0120180b	DNA_gyrase_subunit_A
5785a784c1ba4cb85544976c8321d6c3	DNA_gyrase_subunit_A
8f25e8f421f3cb5496417588ff44ea62	DNA_gyrase_subunit_A
cde3846bc74fd051df05f2038e30797b	DNA_gyrase_subunit_A
04cbf35f4115927a2258350bb62aed5a	DNA_gyrase_subunit_B
0938c728902f77102f05ad9ecb2773e5	DNA_gyrase_subunit_B
49f6a729817b09f02c94425045f39f8b	DNA_gyrase_subunit_B
a01443246c79ee2bc0296b9856e8f72b	DNA_gyrase_subunit_B
28d368b82a249b6c92b3b76023849266	DNA_ligase_D
4abca6256649722cd602fe8ca748aff9	DNA_ligase_NAD-dependent
e2dd70f120479c2f28f6ae7b5ff412f5	DNA_ligase_NAD-dependent
cba546f19196545b5d84fdb7ec1c0cf0	DNA_methylase_N-4-N-6_domain_protein
78afac125a10e63838ae30a8a41a100f	DNA_mismatch_repair_enzyme
216ee91df682628dcc0c2db53b524594	DNA_mismatch_repair_protein
589ad24c75bfb8a9b0682819fb4327cf	DNA_mismatch_repair_protein_MutL
a1c473effa1da7fbef71063333199af3	DNA_mismatch_repair_protein_MutL
b2463dbe5e3fc126eec1c29adbc119a6	DNA_mismatch_repair_protein_MutL
4dff957d2a439ba9ff5266dd15954350	DNA_mismatch_repair_protein_MutS
76e459b61937d3622403ea94edff028a	DNA_mismatch_repair_protein_MutS_domain_protein
410e993b57c66a7a1315a6d110c9cb1c	DNA_polymerase_bacteriophage-type
12c538cb0e536ef9e3b976ed8797e364	DNA_polymerase_I
c53cf8f7208c81e9b4cd85d9ff9b3da0	DNA_polymerase_I
f03d8baa239ba3df0288c94fb85533ee	DNA_polymerase_I
100f5b213c052da6ca58b36f7a485730	DNA_polymerase_III_alpha_subunit
40583b5f0ddadf216a2c96716aa4c4b1	DNA_polymerase_III_alpha_subunit
906414dc09d7a9dc2d81a0a45b1553de	DNA_polymerase_III_alpha_subunit
bc40867599a8d80fbecdbf223e478bfa	DNA_polymerase_III_alpha_subunit
ceb0260a0eae46cfa131a4839f1b30ec	DNA_polymerase_III_alpha_subunit
e2b7e050d7ea99d8fc1135aa8e531cc1	DNA_polymerase_iii_alpha_subunit
04780814197075a38d964377eefefdb3	DNA_polymerase_III_beta_subunit
1d2c6b3f9aa2da42ee639c415d432b72	DNA_polymerase_III_beta_subunit
56cb097066916e6c5251b8155e7ccb00	DNA_polymerase_III_beta_subunit
65a55184205b7aef233ab0de0eaf027e	DNA_polymerase_III_beta_subunit
0ac97a0dc2efc7bba7b9e464574bcf2b	DNA_polymerase_III_delta_subunit
b612d9025be80397bd61a72a97899e5d	DNA_polymerase_III_delta_subunit
f592e1d21228a4a53714ca704778f1a8	DNA_polymerase_III_epsilon_subunit
9ad1b83c19bcfcda0c67a8fffe9b58b7	DNA_polymerase_III_gamma-tau_subunits-like_protein
1367619a69b2a162ef6fe6e5138cf8d1	DNA_polymerase_III_subunit_alpha
13c18a913dac8c0cd06a1e65f9e93b0f	DNA_polymerase_III_subunit_alpha
343dfc314a2045588578467c39def53a	DNA_polymerase_III_subunit_alpha
503ff09995a8c7ffa9dcc6f8a7c224fb	DNA_polymerase_III_subunit_alpha
9febc6d1481fb2d545aab9757d24ae22	DNA_polymerase_III_subunit_alpha
5ffec853438049cec8e439f4e6f223ba	DNA_polymerase_LigD_polymerase_subunit
138dfe62bdaa0f179acfca9c4594424a	DNA_primase
6e38f2ec0e8f7df2a6c43e1ea1d15482	DNA_primase
0a11162c941f337b26c285d49ce22a81	DNA_primase_small_subunit
7f288a62e8b27e902ac5ec6a13e27fe4	DNA_protecting_protein_DprA
13814cbc21b5bb525ae5affd76dd065a	DNA_repair_protein_RadA
363de834659fc17551006bb976db5a5b	DNA_repair_protein_RadA
0d80616129f0c91537cc1f6fe3235636	DNA_repair_protein_RecO
4a7b4a0d56d62411ab0e2cd1a06936c5	DNA_replication_and_repair_protein_RecF
7acefae3a1bc21ae2b902c22781049da	DNA_replication_and_repair_protein_RecO
fd6ea68dcefd2cffe8a7ab576db77f8a	DNA_segregation_ATPase_FtsK
010a4fefc6565f1a93069ead846e3b0c	DNA_topoisomerase_I
2c5114a68ff43eed86d198d9c0e0cc33	DNA_topoisomerase_I
ae0ac1f4410bab0f01e0033457131e4a	DNA_topoisomerase_I
b1f4f965f385973d430face441d82122	DNA_topoisomerase_III
03fd104ce998b59e56da0150ccaf839d	DNA_topoisomerase_IV_A_subunit
6a971d5d3c50e81d1d399708786dd8ac	DNA_topoisomerase_IV_B_subunit
56a7563f162b0f478064594ba57e83e2	DNA_topoisomerase_IV_subunit_A
84f9a92a1a5174b56408758641e40521	DNA_topoisomerase_IV_subunit_A
86d797e0b9f2bf612c36a4745e730b52	DNA_topoisomerase_IV_subunit_A
8cef6086dcdcd957a6e32b9222501a77	DNA_topoisomerase_IV_subunit_A
ccc57ad17400c35070d161108a1cc307	DNA_topoisomerase_IV_subunit_A
00943a64ff8b06ed5320e9dda38cd307	DNA_topoisomerase_IV_subunit_B
68b5fefad9ba5dfee39caf8de17a9144	DNA_topoisomerase_IV_subunit_B
c8c0ea4a4dab8278d851c59bc875359c	DNA_topoisomerase_IV_subunit_B
0e431a3a3d8519f6c26116935d83ebbd	DNA-3-methyladenine_glycosylase
0ad983b7d79c28a40fd621bf6d8ae669	DNA-apurinic_or_apyrimidinic_site_lyase
99ece91a701865b0da37d8264701f0d9	DNA-directed_DNA_polymerase
ba0237680ed089aeb1b9d2c228969bee	DNA-directed_RNA_polymerase_alpha_subunit
e6954b412d2d5f0296333712998b5c28	DNA-directed_RNA_polymerase_alpha_subunit
1f3122da52d6bc40dcdd925545db989d	DNA-directed_RNA_polymerase_beta_subunit
26d0b8edaeb3442b789381eaeec78522	DNA-directed_RNA_polymerase_beta_subunit
278dfaf008eab8f53cdc13c93917298b	DNA-directed_RNA_polymerase_beta_subunit
5102319124704de3edd074d8b2c18012	DNA-directed_RNA_polymerase_beta_subunit
7427b612d8b58cc83489576b1e5d79f4	DNA-directed_RNA_polymerase_beta_subunit
746613567b1c58710671e126330500dd	DNA-directed_RNA_polymerase_beta_subunit
899f4fa65c0ca3d4c5a809267049aee4	DNA-directed_RNA_polymerase_beta_subunit
e61cfdf1d0639a35f1e8b0c2ebd99f78	DNA-directed_RNA_polymerase_beta_subunit
fdd2fdfbc9f5c6724d30f649596a2306	DNA-directed_RNA_polymerase_beta_subunit
5960a4b64c611f82fba9cd4fb134c6a5	DNA-directed_RNA_polymerase_specialized_sigma_subunit
96bc1e335de13aa5062f2328d658ccd1	DNA-directed_RNA_polymerase_subunit_alpha
0695dfaaf8d824a99d9d8037bde74ab9	DNA-directed_RNA_polymerase_subunit_beta
0c1afa3131109dfe5c92d4b0cb498132	DNA-directed_RNA_polymerase_subunit_beta
1e0f445eb1de461beb5c3f9143d7bb15	DNA-directed_RNA_polymerase_subunit_beta
29dbea5654a40714b19fcbdfe875dc66	DNA-directed_RNA_polymerase_subunit_beta
2cfd462ecd419a4c7270591f294ff17f	DNA-directed_RNA_polymerase_subunit_beta
3475f0bdc255dfe948f2b920a2669297	DNA-directed_RNA_polymerase_subunit_beta
6a322e609efb341be64572838c1f7e5b	DNA-directed_RNA_polymerase_subunit_beta
8cda304078ae2e9dfbacd9da02a71642	DNA-directed_RNA_polymerase_subunit_beta
9d5577d8de0bc691b7dbc8b45748ba6a	DNA-directed_RNA_polymerase_subunit_beta
a4ec69a6eb23af4e5a4843c738a3e945	DNA-directed_RNA_polymerase_subunit_beta
bccee5c72222718c9b9884c4995e2efa	DNA-directed_RNA_polymerase_subunit_beta
48d238f1bb6a0b163d496dd4652be973	DNA-directed_RNA_polymerase_subunit_beta-prime
26835930ab84dbffca5ce9b6dbad392a	DNA-repair_protein
d7ad465cf9a277aa47d8e878cfbbfa1f	domain_of_unknown_function_DUF1730
57f5876fc5a0b5ca0e3381ba5f7ff4d1	double-strand_break_repair_protein_AddB
5bb71de100566bfe8c5a392501a04190	drug_exporter-like_proteinr_of_the_RND_superfamily
3de1507d88485948d778fbb1b9d3b195	DSH_domain-containing_protein
c0e6a14ee45136d2846bfb312e929a49	dTDP-4-dehydrorhamnose_35-epimerase
6c02a0da9d502fd6da1bae5e2cadbbe7	dTDP-4-dehydrorhamnose_reductase
70bc04fab5e0b0a709d9e78dec9a542f	ECF_subfamily_RNA_polymerase_sigma-24_factor
911136ce9483fb92699df18924918730	ECF_subfamily_RNA_polymerase_sigma-24_subunit
0c2693013f3f837af6faf11d97bd05a3	efflux_transporter_RND_family_MFP_subunit
873abd0f3d1ddb3e85e789b69ae7995e	efflux_transporter_RND_family_MFP_subunit
4bf19c94fc096cea2eec0883d8a60f0d	electron_transfer_flavoprotein_alpha_subunit
f95a223a80622e81a279907f07ebddf6	Electron_transfer_flavoprotein_alpha_subunit
f42cc8f90d81182aff2a60a442e8c7fa	Electron_transfer_flavoprotein_alpha-beta-_subunit
e61d70588be87f82319ce60433f48ec4	electron_transfer_flavoprotein_alpha-subunit_ETFLS
1f26a6198ccf0b3be97717a02ae3dbef	electron_transfer_flavoprotein_beta_subunit
dfbbbae3df9e074e0a5e2e9c8d594be0	electron_transfer_flavoprotein_beta_subunit
30a0ae8aafa1bd714e2e07a9e8ba599a	electron-transferring-flavoprotein_dehydrogenase
7f7077b79738ec23a547e1b4083b2401	electron-transferring-flavoprotein_dehydrogenase
ab71b56657e273fe960f2a95931c6e62	electron-transferring-flavoprotein_dehydrogenase
cbcc3699b025eb3e39318c77813a9488	Electron-transferring-flavoprotein_dehydrogenase
48ccc68a946c9f4a714b4d63be687808	elongation_factor_EF-G
24d62355c75a7106ab4394e5394f58ca	elongation_factor_G
28ed156852c46bf1683027be7eba39b0	elongation_factor_G
2b228e3e5b278737444d31a9039c0872	elongation_factor_G
e81e4b9c21e8d14a17db6bb72e95d20e	elongation_factor_G
ffbcd43aa7fe39c7589e9faa0d0e4a83	elongation_factor_G
5889f5e14a30c7a3eb2e2665bccfb5d0	elongation_factor_g_protein
7604d0a7e5f8998a8c4047b72d6a4626	elongation_factor_Ts
7d708cadcf25377d466d810b8dd063a9	elongation_factor_Tu
ade499d903bd4e12d79c10a8a8ed615a	elongation_factor_Tu
83ae2aeff4f3699b46fdf772dab4a701	EmrB-QacA_family_drug_resistance_transporter
03e350e061ac23cf8b97332accc94518	EmrB-QacA_subfamily_drug_resistance_transporter
6ca469eb0513a085dd5b6304f68326ee	endonuclease-exonuclease-phosphatase
c5f77323533798467b45f4ac8fa9bba5	endonuclease-exonuclease-phosphatase
cb2433f1da749317901ce4fd6c22e180	endonuclease-exonuclease-phosphatase
11b0fea496fb79d89c1214c9d6086523	endopeptidase_Clp
4bc24bca9de6731f2d5b57731ad008b5	endopeptidase_La
761bcea580aa9d75cee9fdb7ab2035d9	Endoribonuclease_L-PSP
775abee932ed2750acd112ef43f7108e	Endothelin-converting_enzyme_1
23801ad687aec521e47bebfdc810ec36	endothelin-converting_protein_1
75daf08fb244d1b4219eb79995aff622	endothelin-converting_protein_1
abf5c308c52bd26e084b7ee2a74cf381	enolase
1a347dde9e781a85329be9c428cfe593	enoyl-CoA_hydratase
2c50f80639d5710dc6689cf901aaa252	Enoyl-CoA_hydratase-isomerase
e830c2b44a72f9c31f96c3d57768865b	enoyl-CoA_hydratase-isomerase
efad09c741d35596f1900ebaf34d766c	enoyl-CoA_hydratase-isomerase_family_protein
0f58e56270c6c929cef7c6e708fed326	epimerase
0f57ee739a06732b2365b93cd747658d	ErfK-YbiS-YcfS-YnhG_family_protein
0c14edb799d099b2a13742f1177955b4	excinuclease_abc_a_subunit
2b3be4fd71e68147af87c4320922a2fe	excinuclease_ABC_A_subunit
35aee06cdd5bf0d7ca159f09ea7d3255	excinuclease_ABC_A_subunit
3cbc188ef7348fb10c007ff2aec29ef7	excinuclease_ABC_A_subunit
605df345b3466017f5b15fc2586e18dd	excinuclease_ABC_A_subunit
80aac9c7cd31505d07f46adf05ea2a7f	excinuclease_ABC_A_subunit
d1fcc18bde5849704131cde62a71c24f	excinuclease_ABC_A_subunit
e1401bf19cad411d43ea9dffda69ef46	excinuclease_ABC_B_subunit
0fd95059bed872568249d509ec242770	excinuclease_ABC_subunit_A
4cfb8b779de73c96a9062512bb67f30b	excinuclease_ABC_subunit_A
4e2bc28167f76629ac3c413c9e08fdef	excinuclease_abc_subunit_a
6c4ce0c2824dbe57b85bed3173b3c047	excinuclease_ABC_subunit_A
95a9016d6af78594b54126e0081a437e	excinuclease_ABC_subunit_A
c92309624f2c227e61bef764a506eefb	excinuclease_ABC_subunit_A
d25927db4855522d521bea269f1cb613	excinuclease_ABC_subunit_B
836b263b6af6bb533a21943127c9bcc1	excinuclease_ABC_subunit_C
a87aea357086ebc36e08f0ad58c5e472	excinuclease_ABC_subunit_C
0d9297689e75cabb1eb7e220841078a8	exodeoxyribonuclease_III
604fcb3c37bf3f1aa045045452356b6b	exodeoxyribonuclease_III_Xth
c707981396eae01591720e69ed23a50d	exodeoxyribonuclease_VII_large_subunit
bce347e1878702e69fb17f76e4e56525	exodeoxyribonuclease_VII_small_subunit
44a6a075acffb004416252eec590ed33	exonuclease
7bc3cddfc1f240869edbd73c2c78c248	exonuclease_I
b6af0318fab9e79ecfcf447efd328e7f	exonuclease_RecJ
9bd469d1c95623493fafbe2760e1a3cf	exopolyphosphatase-related_protein
a2e2023f493b5591f1811850f8351128	exopolysaccharide_biosynthesis_polyprenyl_glycosylphosphotransferase
cf8b7cef9ac2063507c218864e08ef1c	exoribonuclease_II
6e08c35c42343616de2c62ae16e189dd	Extracellular_ligand-binding_receptor
335d44cb251d3023d2c8f07d247a2fa4	extracellular_solute-binding_protein
4a3ae92923bc4c241a5023cead446792	extracellular_solute-binding_protein
5d501d0ebe1b9e69a0704b554ae50730	extracellular_solute-binding_protein
85e73bd58f4bc603fab90a33821c5bea	extracellular_solute-binding_protein
0d30db222ee66e42ba78dbb0593d3fc6	extracellular_solute-binding_protein_family_1
3e261f10a633c4bea794d661829d95ae	extracellular_solute-binding_protein_family_1
78b0ba2b1cc0cf466b5c78a008c73ea1	extracellular_solute-binding_protein_family_1
c77d310533392487a20c7e01949a89ed	extracellular_solute-binding_protein_family_1
9977693bf828374662887ad33f264079	F0F1_ATP_synthase_subunit_beta
63e41611bcca45ea94492f9e397f6762	F0F1_ATP_synthase_subunit_gamma
b8649337e4351bea28452dcef84c2ce1	F0F1_ATP_synthase_subunit_gamma
78ec50268c94884a91cd78390b539e8e	F0F1-type_ATP_synthase_subunit_a
234c3e64c215614d2425943bf1117ba5	FAD_dependent_oxidoreductase
4e6f4f491fdd7c22b8b11d73ccf544ee	FAD_dependent_oxidoreductase
9f96f66cd0c4ac6ae57c3acaa275bbd9	FAD_dependent_oxidoreductase
ea13ce4306df45bcc30b595ea3341b6c	FAD_linked_oxidase_domain_protein
0c4b17eda965066cb88fa13276b643e9	FAD_linked_oxidase_domain-containing_protein
0726f8bf2f6e4fe8b050df15acf48a7c	FAD-dependent_pyridine_nucleotide-disulfide_oxidoreductase
e483928b3b119f3821de30c67f86bf62	FAD-dependent_pyridine_nucleotide-disulphide_oxidoreductase
d3c7978cf30f7f2bdc54ebb05723baab	family_2_glycosyl_transferase
4a0926141d4cb091a3341bc6778bc54b	family_2_glycosyl_transferase_protein
d9d3dc0d3f4cad4fc0620e8a27030986	farnesyl-diphosphate_farnesyltransferase
96e4ffe8243285cc2eef561d0fffff12	farnesyl-diphosphate_synthase
9fcc52aa7eea311ac7eb97423bfe530c	fatty_acid_desaturase
2d06b40f71a1f3031badb6f274d69097	Fe-S_cluster_assembly_ATP-binding_protein_SufC
0f9b3d363a697b5e818dfed2919bae1d	Fe2_transport_system_protein_B
25b922e8773b0a20acba11901aac0d9f	ferredoxin
108025cbb103ad9f5d2ab1bb2dec76cd	ferredoxin-nitrite_reductase
4a2274a41064fa747659dc42e06006e5	ferric_uptake_regulator_Fur_family
1427c649c0286020dea5603b41846bea	ferrous_iron_transport_protein_B
1dade91981cd90f50f7d3046cd0810be	ferrous_iron_transport_protein_B
0f6964d7dde2b16a2e2cc163208e3c9e	FeS_assembly_protein_sufB
f63f79626d1654908d60e4fe7c343784	FG-GAP_repeat_protein
746424021986f067c4fa68875c78b17f	FG-GAP_repeat-containing_protein
32e9666e32b210e7df2d3675c9f5926a	fimbrial_assembly_protein
76e1cb99053a941c2da6d7645c060c00	fimbrial_assembly_protein
c80be900542e821a63d45a340546a28a	fimbrial_assembly_protein
53d4e6c8c1c63289c20ac91b4c0ece54	fimbrial_biogenesis_protein
aba7bb05e7479f67ee55430a168bc5f3	flagellar_basal-body_rod_protein_FlgF
c0722e75fd0f428cdfb4f350aab816d7	flagellar_biosynthesis_like_protein
0f21637a9e97979afb3840d623d44994	flagellar_biosynthesis_lipoprotein
ce4b384919e281bf52f32f05fa497c22	flagellar_biosynthesis_protein
26eaeee6bb4dd7d6b514d84a19b60dc1	flagellar_biosynthesis_protein_FlhA
28acc6584498be64c395a4bacb04663f	flagellar_biosynthesis_protein_FlhA
851618aeb12a5ec8c01dde1ebb2d2f4d	flagellar_biosynthesis_protein_FlhA
94b7b233fcac47dabc833be52df71c0b	flagellar_biosynthesis_protein_FlhA
1326b4ebef5e6f87c12702a4ef480b85	flagellar_biosynthesis_protein_FliP
b990241d04b4f9af55ff9407dc88836e	flagellar_GTP-binding_protein
7a51458a0ef3174a221557876a66b1e9	flagellar_hook_capping_protein
a1c5ea014c1f1ed287b72dc13bc894f7	flagellar_hook-associated_2_domain-containing_protein
f6911d0393086977e30edd7775c93ac3	flagellar_hook-associated_protein
00dfccf157035a034cda8f89cd49479a	flagellar_hook-length_control_protein
f5961677bc5073833d814411fdec24b1	flagellin_domain-containing_protein
efb9ca3c1df6f5047948a624a4d34248	flavin_reductase_domain-containing_protein
240f4e0a709a8fae2e94b1b10d921bd8	Flp_pilus_assembly_protein_ATPase_CpaE
ba00b49d3f1483371c2973d9c42c1a23	Flp_pilus_assembly_protein_ATPase_CpaE
19fd1a13eebc4bc47438b94b515318b0	Flp_pilus_assembly_protein_CpaB
84907afac13cee8af80de97b8a29b589	Flp_pilus_assembly_protein_CpaB
59c34e2c7658eb8a2f04db05276159cf	Flp_pilus_assembly_protein_TadB
e4d74ab61175e4a6545a7970be442c02	Flp_pilus_assembly_protein_TadB
0a9e9a61a81730f2844943027dc53022	Fmu_Sun_domain_protein
e58f54cac1c5742eec57fef35be52c74	FO_synthase
a8be8808b7934a06e400111c59463872	FolC_bifunctional_protein
4f850d725815b1f6820c00fb8001f7c0	formamidopyrimidine-DNA_glycosylase
684e9d2a5b1f946294119bcdf9d30e60	formamidopyrimidine-DNA_glycosylase
047c774ab2beb9aeed6c78f81ec22441	formate_dehydrogenase_family_accessory_protein_fdhd
122197df5f5315836cc47f52ad640fd8	fructose-16-bisphosphatase_II
4373709360874b85620537a2f0924ee0	fructose-16-bisphosphate_aldolase
968c7de06eb4bdcf9e4adbcb2fa2350c	FtsH_peptidase
7312ebcbee442515253d3ca96d584790	fumarase
636a8a842386b889067a20f9ce03afcd	fumarate_hydratase
e4daeef4958cfdceb8990d0f14551e86	fumarate_hydratase_class_II
e582b8c5d8f976700feceb759de2ab75	fumarate_lyase
6b02f76e50f4858060395c6fe821367f	fumarylacetoacetate_FAA_hydrolase
974955395e75b424c489bb6234b7e60b	fumarylacetoacetate_FAA_hydrolase
66cd2a3ad3699bca37e5840dec0bc314	fur_family_ferric_uptake_regulator
ea5cc0938a72fde061097e2f84cc1387	GAF_domain-containing_protein
03783373e1a730b10ead79d3f66797e6	GAF_sensor_hybrid_histidine_kinase
141ab788552a99768a6e0d6d3847541b	GAF_sensor_hybrid_histidine_kinase
4f37c20d2940ce5e9e1ab35eba0ebda8	GAF_sensor_hybrid_histidine_kinase
6ca009f78e823fbbe0ddaea083b588c2	GAF_sensor_hybrid_histidine_kinase
a1bba4607dc159aceaad8a05f5375e6e	GAF_sensor_hybrid_histidine_kinase
dfc79be87d545512d2010847b62f98b4	GAF_sensor_hybrid_histidine_kinase
f31e332bc568189affead99f5ad766d3	GAF_sensor_hybrid_histidine_kinase
b1c84ad7fedc09ac71ea2abf2fa58769	galactokinase
568ef59f480ecfbf280f948eb1e9d06b	galactonate_dehydratase
01f72dad569933faf6dcedf2f64e27be	galactose-1-phosphate_uridylyltransferase
f397d7ed9e9ff19618639285dea1b992	gamma-glutamyl_kinase
1f8041db33d065493f2f0ab8de86580b	gamma-glutamyltransferase
0cf5eb368d600cb2d212ce9694ba6f84	gamma-glutamyltranspeptidase
5f77f3ca7cce787565270b0d8f23bb4d	GCN5_N-acetyltransferase
b5c7b6e091c695a5cc83056b4993aa2a	GCN5-related_N-acetyltransferase
dc01b1c990417003c7048e9d262bfcdb	GCN5-related_N-acetyltransferase
fd4a786dc43ca8e711c3a211ea92066b	GCN5-related_N-acetyltransferase
5c41b9526648071f68ff095e750589ab	GDP-mannose_46-dehydratase
3d42d4a71aef707efee5195c18e7fd55	GDSL_family_lipase
59e443a8f117421b09b4fd40a0ce5c84	general_secretory_pathway_related_protein
6a213c6eb0f292c0ef2d79e3bf445406	GGDEF_domain-containing_protein
d644ca471b3338760116edb588f6f15d	GH3_auxin-responsive_promoter
67ecfebb0ca88d073c5b4b4c9639ac4e	gliding_motility-related_protein_adhesin_AidA-related
06188d42e537b2641d5a6117c11be256	globin
d55314d7a1e6cd3e3a4bc99dc92c5c18	Glu-Leu-Phe-Val_dehydrogenase
a0344cd2a730351e00d91028ae640e68	glucosamine--fructose-6-phosphate_aminotransferase
ee52f8b22127e7fe4b811f010eee0a1e	glucosamine--fructose-6-phosphate_aminotransferase
c1b2cb8277eeb784366c542a5e145751	glucosamine--fructose-6-phosphate_aminotransferase_isomerizing
652a1e9af273ef20f60f2ba250430f47	glucosamine-6-phosphate_deaminase-like_protein
93c3cf7e79c6f8a36e894a239ff0bf7a	glucosamine-6-phosphate_deaminase-like_protein
0898aaa9c037564d91a2b66e4dafc654	glucosamine-fructose-6-phosphate_aminotransferase_isomerizing
4fe9a3fb38e9d855cafa96eb450017c4	glucosamine-fructose-6-phosphate_aminotransferase_isomerizing
6d13a7fcebe5b4e010c5e59b815fba20	glucose_dehydrogenase
95562432755d33501ebb54d0a7e8925b	glucose_inhibited_division_protein_A
3ed7f13ea072fd08e729321a95324342	glucose-1-phosphate_thymidylyltransferase
3f5689682a1c06cdff93e0c33a7192ec	glucose-1-phosphate_thymidylyltransferase
6e0ee4e27f805982e04a04d771df451c	glucose-6-phosphate_1-dehydrogenase
9d5f5d5e1127ca8a7194d6eff4b5942f	glucose-6-phosphate_1-dehydrogenase
486be28f8752796efe24e7e578cd63f4	glucose-6-phosphate_isomerase
117d4e4676ba13d810f932995972be91	glucose-methanol-choline_oxidoreductase
129b910ab96bf77641657f732d046620	glucose-methanol-choline_oxidoreductase
393c22c67659e23a0487a5d229919ac2	glucose-methanol-choline_oxidoreductase
35ca105da78b73cdc2325b233db539ae	glucose-sorbosone_dehydrogenase-related
e68f991027472489260162061b228cbb	glutamate_decarboxylase
a82fb021384b576229c173143089c15f	glutamate_dehydrogenase
9f2877a261db1fef7c4099ce8961df6e	glutamate_dehydrogenase_NAD
939795d83ee1d27f1a67eca7cfb13c46	glutamate_synthase
3362e8758aaa72a722ece70b219cedb1	Glutamate_synthase_ferredoxin
3689c8f6aae865993019a46be1cbaeea	glutamate_synthase_large_subunit
7b6df2fccd856703315b8aecea0105b3	glutamate_synthase_NADH_large_subunit
f65eab5875f6ff99cfb7e2968b0da0fe	glutamate_synthase_NADH-NADPH_small_subunit
ad28a5682e9db5d101d6c0f5ef305cb6	glutamate_synthase_NADPH_large_chain_precursor
92c4c35ba8e0e8ede17a990cfc5e1190	glutamate_synthase_subunit_alpha
cf0d86f9ceec725ec9f74cb9607030bd	glutamate_synthase_subunit_beta
59c3b45ce285b0a0eb0a726fb04c05d3	Glutamate--ammonia-ligase_adenylyltransferase
8a41bebc5eeea2022fc636b6d399ecea	glutaminase-asparagin-ase
2f7a33f195090943c9b62718d12f49f3	glutamine_cyclotransferase
1c69643f35cc726c3d17bd71290845ab	glutamine_synthetase
72419965feb17cd80ca44eec7c2d6b61	glutamine_synthetase_catalytic_region
0a1a6172a9eca03cb76c321b7dcb45c9	glutamine_synthetase_type_I
3d40447f8e6f061b4cd50ccf39ebf1d8	glutamine_synthetase_type_I
7a765b427c1a0419bee64d77b017ce42	glutamine--fructose-6-phosphate_transaminase
8307b18f4bb0deb5227b04837857d8e1	glutamine--fructose-6-phosphate_transaminase
bbf3d01f14f2a0e9ff66c3244f0d7f1f	glutamyl-tRNA_reductase
8fd970e94fc2d87299c000ddf1796035	glutamyl-tRNA_synthetase
c53f45819eca6f571781b637c7b45e2d	glutamyl-tRNA_synthetase
baa2d9a7297c2262dcd099ab6dc5f4e3	glutamyl-tRNAGln_amidotransferase_A_subunit
ab4240e4c778b44e7aaf88283ec13682	glutamyl-tRNAGln_amidotransferase_B_subunit
ea649408719f3f17e85df0523121738e	glutathione_peroxidase
689330ee4f0e937bc4f0c89367443112	glutathione_reductase_NADPH
7ef0e373af3b8b1fde6bff480cc7b4e9	glutathione_S-transferase
d869e136178e40f31df6624cf5008bbc	glutathione_S-transferase
fe91038b0fdcf5523789395c8ab50d0a	glutathione_S-transferase
4d450dda3bfd484b1c7f802377365f7c	Glutathione_S-transferase_domain_protein
e9240a9a67aebbf35afa81cd383f3f49	glutathionylspermidine_synthase
475422eac46545a8d450eb46cf8f4809	glyceraldehyde-3-phosphate_dehydrogenase
ce7432185c72e9a39da9f5e3a0905c4c	glyceraldehyde-3-phosphate_dehydrogenase_type_I
ba3fe60e5d5056638934e1dc29bef4f2	glycerol-1-phosphate_dehydrogenase
4cc54493fdc43a73cf22639b1c5bb36e	glycerol-3-phosphate_dehydrogenase
4eb9ec5ef81f5bd28400a3266d5233f2	glycerol-3-phosphate_dehydrogenase
129c8ecfcba1025ed022dd754dcca7cf	glycine_cleavage_system_aminomethyltransferase_T
50f25fea916978abe34b3c6e836ff34c	glycine_cleavage_system_T_protein_aminomethyltransferase
f007668a080f765747aaa938330c69dd	glycine_cleavage_T_protein_aminomethyl_transferase
554043507a5d6671536e90547c80066a	glycine_dehydrogenase
2eff4d3a53348b301bbea80cef08c3a4	glycine_dehydrogenase_subunit_1
45a62a60100178842243ba6ad767d0b7	glycine_hydroxymethyltransferase
9c2f88ef2dbe58a0b0b9672bac54b0b1	Glycine_hydroxymethyltransferase
9c28fc794cfebe07278a4dfab527a7e2	glycogen_branching_enzyme
4c90aff5a6292bfeb471ea9297ea14d9	glycogen_debranching_enzyme
53ba9022b8c3c4a8add47d8ea427e935	glycolate_oxidase_iron-sulfur_subunit
b0c362020f6eee5e8c20347605f53897	glycoside_hydrolase_15-related_protein
eddb14ba321e999fbacad29946542eca	glycoside_hydrolase_family_2_sugar_binding
ff65fd6fa96f711105565c685ef2d086	glycoside_hydrolase_family_2_sugar_binding
9c7e037b43e2c779558008c2970a2d57	glycoside_hydrolase_family_29_alpha-L-fucosidase
8143480206efdc660f4dba04fdab4b4f	glycoside_hydrolase_family_3_domain_protein
8280da8092d5f884c0ea1429e4478411	glycoside_hydrolase_family_3_domain_protein
3c10b3c58dbb36c6c9604a8eee7ed468	glycoside_hydrolase_family_3_domain-containing_protein
a0d24d7490dc00856ba691518cc793d8	glycoside_hydrolase_family_3_domain-containing_protein
123d47b2256bc677dd26d7394e7ec179	glycoside_hydrolase_family_protein
2c2199683a11be5e02b1c307d30ab5e2	glycoside_hydrolase_family_protein
32462bb60282327941dc70f936704446	glycoside_hydrolase_family_protein
4bb216b7649c1c2bec4d5c81e40f08f6	glycoside_hydrolase_family_protein
6b61ca039e4368c51969b54ea36de7e7	glycoside_hydrolase_family_protein
f7ac9d436b2da946e551924f73a86d95	glycoside_hydrolase_family_protein
05960e6744aee1bc3eedf46074ad1238	glycosyl_hydrolase_BNR_repeat-containing_protein
59cfd929de062f626c53258cbce13b11	glycosyl_hydrolase_BNR_repeat-containing_protein
5e52b75fc08020ea84ff6818030cd6b9	glycosyl_hydrolase_family_88
d847a79e772245f136aa22ad2c84ed4b	glycosyl_transferase
e463c934f51820ead991c696f9a62f3a	glycosyl_transferase_family_2
316a7ef9d661fcd26acf517f570e16de	glycosyl_transferase_family_51
5c196f4ee91b83781a9b087e287d3239	glycosyl_transferase_family_protein
d59188fa17bc492e98fb6bf0b5f29291	glycosyl_transferase_family_protein
0cf2d8a88410e0f67f18d5b8b5d45e8c	glycosyl_transferase_group_1
42751e370a790e795db1eb1466df8bfb	glycosyl_transferase_group_1
5cf5a104c07ad951da31651cdd56189a	glycosyl_transferase_group_1
90617734df304a8e2eaa538380805150	glycosyl_transferase_group_1
eb9efe79aa1a7181bb80a8dc999c23b3	glycosyl_transferase_group_1
14f8ddc825bb34c24aeca35d3e0c0ca1	glycosyl_transferase_group_1_protein
3b70d9569a4d471e6c579d9c98092ac9	glycosyltransferase_36
65e2b72ebfc489f8e69a5b922d20452a	glycosyltransferase_36
dc4eb391adf1ba27dd43ca98db651fd7	glycosyltransferase_36
c6a8f7a0b9fd52f11d1a1ae51442c3d2	glycyl-tRNA_synthetase
82907ab1c942004e7a176f22bac1e185	glycyl-tRNA_synthetase_beta_subunit
4a185479262c1dfe6d85dc5a4c0670cc	Glyoxalase-bleomycin_resistance_protein-dioxygenase
5ef2137ad2e01a2b67214e3d7fc243d2	glyoxalase-bleomycin_resistance_protein-dioxygenase
7942876f2b4a7a346c6476f45deaf746	glyoxalase-bleomycin_resistance_protein-dioxygenase
92bcef5841f105443d1b7b7becdaa340	Glyoxylate_reductase
e7cb09d64a8e159fd98795bac2b83f4f	GMC_family_oxidoreductase
0ac6b8d51a6f1cde8c395a56da115e7c	GMP_synthase
aa463d525bca4a6c767a5c8ec9eb685f	GMP_synthase
55aa548abff36d22802c3d683cf7ece3	GMP_synthase_-_glutamine_amidotransferase_domain-like_protein
319ecac77f9d149fdbf20407a1318925	GntR_family_transcriptional_regulator
a6569a888caae64f835da58bffd4325b	GntR_family_transcriptional_regulator
c80b4379b99dc561d81072649e566854	GntR_family_transcriptional_regulator
d8a25f87d5ab47cf845a5141190c5572	GntR_family_transcriptional_regulator
1af51d5b135625a758e84e1d974aa387	group_1_glycosyl_transferase_protein
b7f0e6269eb6d1bdf45a66f5cc6db395	GTN_reductase
4cd832db8abcac277cea68e95511bf4b	GTP_cyclohydrolase_I
81522b45a3ada5e34d3ef4cfa2a4032e	GTP_cyclohydrolase_II
a3c2650e61cec52a53f4076d5d9f909f	GTP_cyclohydrolase_II
56fc81f69b7a855d4dd618aa4d2d0127	GTP_cyclohydrolase_II_-_34-dihydroxy-2-butanone_4-phosphate_synthase
6aaf009bf0ce2700c16f516960be128f	GTP_diphosphokinase
6d4dda20a56eca84726bc371f30e8296	GTP-binding_protein_EngA
3bb9945d187eb972a563267dc8d05bc8	GTP-binding_protein_HSR1-related
2b938f9b53ede2f7bc33332ebe2a747a	GTP-binding_protein_LepA
f18b29f91d2169a61b290012c46a1576	GTP-binding_protein_LepA
5441f7b23f1933f4c9f30b871fc33f75	GTP-binding_protein_TypA
5d3161c3c1e515468c3537a347b613c4	GTP-binding_protein_TypA
7b39d2246ca9c6e41bb4efb034b7bbb6	GTP-binding_protein_TypA
a3afb3d333634e0ab5a0da78d73d90ab	GTP-binding_protein_TypA
c5128d7d3e4b48ff0cce9e84f2d18494	GTP-binding_proten_HflX
a7b85b62acd8c2e9ce28c56063cb7dfc	GTPase_ObgE
18352f2d90b3492afeab6343f00bf2b6	guanine_deaminase
56f8bfedd1ff47390d5e24ea42e33b57	guanine_deaminase
74ddcd378c4abd4b848032f197b17404	guanosine_5-monophosphate_oxidoreductase
d9e0cb16b734267f94a2a8d314eeefa1	HAD-superfamily_hydrolase
76d18ce1b5be281af36b4d0a36dec553	HAD-superfamily_hydrolase_subfamily_IA_variant_1
5429429c32c531802134a2a6b9a88737	haloacid_dehalogenase-like_hydrolase
69c28aa6ef8cf7b0a8c83c393284dc8b	heat_shock_protein_90
d356b42b5560f7c604e1db821f61c2a5	heat_shock_protein_90
c1784663aea6ac4fd360f1f653928a7d	heat_shock_protein_DnaJ_domain_protein
20558c52f99162bd63d7a54735f8e764	helicase_c2
4f2209e3f0baa0e380bc38e0887d28e5	helicase_c2
8642379dc1c765ddc2741d8104129167	Helicase_c2
32c63a9f156eff649dff4cd38f9a6027	helicase_domain_protein
43763378adcd0c6d1433638cb8b4bc3b	helix-turn-helix_domain-containing_protein
2100a80020cab91083233876cdd5b0cb	Helix-turn-helix_type_11_domain_protein
3bbc8d69da4d6fb0bd3f8fedf604b49e	heme-binding_protein
4284a38d897dcc8363e8549e23af88ce	Hemerythrin_HHE_cation_binding_domain_protein
21cd183a879ce7a80e9c5a43731f2148	HflK_protein
e0fe2a36545901cb96801ee6705034ae	HI0933_family_protein
c8a55b256423dde5682d2a46b4556600	hippurate_hydrolase
13d610ef2339442c8a6eebabb632474f	histidine_ammonia-lyase
3142e9468b5618a3acbbcdb2a99ac942	histidine_kinase
7589e70b1b03d61166da975ac90bd3bc	histidine_kinase
7dc6a5405635a791324ee18f14294525	histidine_kinase
8248bb2bce6b91bbb9fa23186a087aba	histidine_kinase
a13999d75d4d48515727fab790bbd540	histidine_kinase
c306f2c52c7cd8093342d30037708ad8	histidine_kinase
68c8843fd9468d4e892c58b8209a57d3	histidine_triad_HIT_protein
caac083bd5c4cfa6d34dbfa1410af59e	histidinol_dehydrogenase
330e7e405c604e00da2af82026662d11	histidinol-phosphate_aminotransferase
95d5588b03db002ec32d71c1fad368ad	histidinol-phosphate_aminotransferase
65ddef0656ed7e3448090ceeec74a8e9	histidyl-tRNA_synthetase
06acc33fd9954dec56eca871b2c702b4	Histone_deacetylase
2845d2d47521644a6f5819bde3e550e4	histone_deacetylase
b7974eda717a9de60920aec99f5ccc8f	histone_family_protein_DNA-binding_protein
cce4957c0f2b6f3dc3c79d9e5e0b9c25	histone_family_protein_DNA-binding_protein
eed7fb6b1f6d79968c2e8caa4499dd92	histone_family_protein_DNA-binding_protein
12a698e712989f8b44454008cb9809ae	HlyD_family_type_I_secretion_membrane_fusion_protein
bb16022b61ed8ffba2f9df2161889e00	HlyD-family_secretion_protein
906f98960189a93a93f3abe4cc245d26	Holliday_junction_DNA_helicase_RuvB
0558d917f8fa3d9aba82b076b0f2fd76	Holliday_junction_resolvase_YqgF
9e54c6fa7c85b5914c178425f548530f	Holliday_junction_resolvase_YqgF
2edde0c40de0d8f11919a4216f36e005	homocysteine_S-methyltransferase
60c2cfa8313a766b99bfbe781de9b064	homocysteine_S-methyltransferase
8c2db5ad3fbb73c2d095db5719b8786a	homogentisate_12-dioxygenase
e2eff30305b41c5cf4dfcff48369b428	homogentisate_12-dioxygenase
189eead5cd6cba98e164d5756f737760	Homoserine_dehydrogenase
6b86c2ba5c58123ce93488f5a7a2d59e	homoserine_kinase
c1bb518375bb95ac5a8a0211e47f0a0f	homoserine_kinase
1f0c818eb2e9acc2e5443da94d8a1e09	homoserine_O-acetyltransferase
C938462	hp_1228988
C183559	hp_274725
C126006	hp_371052
C151015	hp_445864
C529019	hp_483126
C76409	hp_654916
9e61afce6c366b68a97d506e5a561b37	HPr_kinase-phosphorylase
f5cd153f60cc2aa3d42c97aec9b00674	hsp70-like_protein
d8613a9d483aa1b3016ebfb79ba72556	HtrA2_peptidase
7914967d32f458f56de25b88e442f080	hyalin_domain-containing_protein
64b84b6207eec645a7f972a2fff932fd	hydantoinase-oxoprolinase
9a68700bc14c71ad4db9f20e34a43dff	hydrolase
282e6c55ebb7bf3b5f1d70bb42d356dd	hydrophobe-amphiphile_efflux-1_HAE1_family_protein
f762687577d3eb13ae0e0b6ca83d03e4	hydrophobic-amphiphilic_exporter-1
2b13f50ceb220e6dca5ace41dce1d85f	hydroxydechloroatrazine_ethylaminohydrolase
8c2397998fb2e56a43b00cdc73960187	hydroxypyruvate_reductase
37337bc6630115a424dbb4dcb8e3461a	hypothetical_membrane_protein
592d920607ec3d04197ce213b5c2b234	hypothetical_membrane_protein
007cd1297fd01aec3e3581a82935dd58	hypothetical_protein
0156a107d5a222d3f11b32596df36733	hypothetical_protein
0243e7f446937cd7d499f26d56e73cb3	hypothetical_protein
02980301fd03e1c65b1dcfefbfaf8fbb	hypothetical_protein
03488189728fdbf4a03fd4ebe0203355	hypothetical_protein
04c9e02fbb7498f2d1b372990a6039df	hypothetical_protein
056c04b60640d4e6ee62431a6e96f666	hypothetical_protein
057ba0975955643b831ffc1c43afd196	hypothetical_protein
0582ad28c9225c35154d5f92ceee0184	hypothetical_protein
076d8dee2728adc72b0ea75cdb634995	hypothetical_protein
0855524d839564c0bdd7780186fa1f9d	hypothetical_protein
0a3c567469894933f691e6e33b32aceb	hypothetical_protein
0c3a4a0d842504e2004aeac59f63188b	hypothetical_protein
0d9c0a3af6ebd391d1861ac7da36d19d	hypothetical_protein
0ede2dc1df0011f543ea962764618352	hypothetical_protein
0ff94c7f123eee0158eb419aa270a015	hypothetical_protein
10d426fd2980ee4f849f430039f0a703	hypothetical_protein
12b572f6de0ec7c4188603996d47f16c	hypothetical_protein
13c806177b070e74579c68f9e28c9bd7	hypothetical_protein
164bf98161cc71e014e88bc531591f43	hypothetical_protein
184b6671929c3b42a7fc2f407fb90091	hypothetical_protein
18cf787c33777bb01b48f16f757a72f3	hypothetical_protein
19666177e7f69893b3fa3a076cecae85	hypothetical_protein
1989c0fcfa3d88ee85f250f58486de5d	hypothetical_protein
19d4289612965c1316ede77ec3c480ae	hypothetical_protein
1a017ab6f59c1700ff50280c998266c6	hypothetical_protein
1a43c1ca3a562be0f83fa8f108b50dd3	hypothetical_protein
1b31b2897c15817a4a25bf147ccb1a9f	hypothetical_protein
1bd852820fb89450e8d8392b0c39c930	hypothetical_protein
1c7efb0720be95174151e61ac693d5fd	hypothetical_protein
1f7a51a7b9a5d055fa7d2a22ddb15bd1	hypothetical_protein
2155edf5ffe375804df53fa618463534	hypothetical_protein
26c41f9d8d22304dda0545f609572599	hypothetical_protein
28295ab7cebfac0fb3aa58a1cc332536	hypothetical_protein
2a6da60088049fb952350feaf195bf10	hypothetical_protein
2c53feea06827b1c2442fe11d19bd0f4	hypothetical_protein
2d1d58ec5a7e8136a05d8ab359c3b0c4	hypothetical_protein
2d4716e27b77d0e449c9533d808c8b25	hypothetical_protein
2d7ee3fa59cf290492ce817b9f998821	hypothetical_protein
2d87099b4e9aa656cb59c41bddfe8ea6	hypothetical_protein
2e05a3f9e79bd4a7a58d93ee88f73e35	hypothetical_protein
2f0232b87e6c083d80dfff6f9907d78a	hypothetical_protein
2f71a0ee27af25959b77df7a33a5aa30	hypothetical_protein
32596f0ed9bdf6537d514105406ae988	hypothetical_protein
325c09cb965466772270194508c200e0	hypothetical_protein
3295a4e06d36926fd1875629bcd132af	hypothetical_protein
354cf876b9144748101422f942c83403	hypothetical_protein
358ec6a04e56f09cfb29c53e40d47ecc	hypothetical_protein
367b45447f411225ef463b7e36f5193d	hypothetical_protein
3689d43e98fe28cfaa21923537117596	hypothetical_protein
36af2af79761582e8219c0124b2b9e85	hypothetical_protein
378330c1bffc5cd035704e6a5fff759f	hypothetical_protein
378f5ff8ef8ce0652dd1c29ecaad01ab	hypothetical_protein
3811583b337d255b93cc9145b18cde25	hypothetical_protein
38a74ace83f68681d6e38e12fc35b8bc	hypothetical_protein
3a4dc6e29c56b4ba94c15715a0527103	hypothetical_protein
3b141d8d577257f3b38e3f29b1903b8b	hypothetical_protein
3bc363dce4b0f635f891e919a56e07af	hypothetical_protein
3de4003151be0a25062d9d03b4bfa38d	hypothetical_protein
3df56014b5a8c1195440be81b7244b62	hypothetical_protein
3e47f2019a524af8654f0cd38255f88d	hypothetical_protein
3eda97d4b58f3540abe2c06063563133	hypothetical_protein
3f5cb54b6d4027e97b67e9bab8b3d4d9	hypothetical_protein
42148db5be3e132c20dea07502599dc6	hypothetical_protein
461905379526cd5fe609931ed4ab9b53	hypothetical_protein
4659e14562e58c75a4ee96c235acff82	hypothetical_protein
46e44e9d88546ec89e026c6937cd97a4	hypothetical_protein
47200c7c34e2b22f09468a70eb2eb29e	hypothetical_protein
47db44fd084c67a543ad5791919e2b6a	hypothetical_protein
4812980bc6218245be2d7cc41031a5b6	hypothetical_protein
487b1eb1deebefebba55df00f866faf3	hypothetical_protein
4a3778b86cd5201fe910242de8472bc6	hypothetical_protein
4a5890a1afd774b9e1edbb62ac0d072b	hypothetical_protein
4c3074b5b4c2a471cb7530b934fef10e	hypothetical_protein
4c51424e18606d3e1a06e07e3fd3545a	hypothetical_protein
4dc2d36c760b640687560e90747e8ab8	hypothetical_protein
4de39926a580e412c5ac8d3874f8dcb1	hypothetical_protein
4e2e2a183121055134825e3b0c920daf	hypothetical_protein
4e2f6eae8a1afc3b1cb82ec6fc0fcdd3	hypothetical_protein
4e460085e02e8a6f78a0e575cb4ec547	hypothetical_protein
4f037c66ffa50d10ba441bd087e5292d	hypothetical_protein
4f0d1a6d93f3c0ad5f77f43920e131f8	hypothetical_protein
4fdd23da287ed6049ca60e9090a419aa	hypothetical_protein
51629c6205bf1f19b462b317bf5ee29a	hypothetical_protein
5212601bff824bf0146f6e24a61446ca	hypothetical_protein
537c2e7afbebe9f8d4bd7791923adafb	hypothetical_protein
538d8d5cb1ab235269d49a750d5bb399	hypothetical_protein
53c9f42e8d469ce436e4e6d015eba22e	hypothetical_protein
550a8200ade404d7fb640a3593fb42d1	hypothetical_protein
55fe4fcad716a42c1c279e3f40a7b6a0	hypothetical_protein
5670e4dc9e80ca1e5e4976d0b8f2accd	hypothetical_protein
56808bf0e0caa57a8ed782c62212a1eb	hypothetical_protein
5782db6eaba94527fa60976ec3b254cd	hypothetical_protein
5786f823a83b9fd52c4e8318f60ccca4	hypothetical_protein
591e5ac2bcd6cf89541bc8c0fbae09f6	hypothetical_protein
59cb16240b2774202393bf894841a1b2	hypothetical_protein
5a7ab129fb6143b5e171a4ac7b37e318	hypothetical_protein
5cb37e4499c74cf1d2eecaaffacba0ca	hypothetical_protein
5ce2faae2c5cf9db1279e6e81d42e567	hypothetical_protein
5fe7baa9f08e84b1bb105a8b78058bd8	hypothetical_protein
61837e1b1ee2cd4221e7532d1fb4a5e8	hypothetical_protein
61ef285b38065a4abd87342af5e96b95	hypothetical_protein
63c581004396619ea6760fb8f5adff7c	hypothetical_protein
643d010440bd70bb3a03c1071202af04	hypothetical_protein
64e5e14c13c521a3c9a13c63926ca7ad	hypothetical_protein
67c76577abd3a65b6cfe77104d7cfd43	hypothetical_protein
6a331accd67a2725365fa006a233ae14	hypothetical_protein
6c6b1cefb7c2d8bd5f3475b44af1ebb9	hypothetical_protein
6cdac479f643aa41c96ed014724bcd06	hypothetical_protein
6faca91c7d48fd19c5dbe53525e4190c	hypothetical_protein
70519f443cecd7cd198ddc64b6cb3ceb	hypothetical_protein
73109ed78ed7f5f01fbe9c39444fcc85	hypothetical_protein
742b98b279cdbeace158da4b84fc05a3	hypothetical_protein
74a611c6228d9b97d0f0f83b80d72fe1	hypothetical_protein
753db9db506c304cc4461e78dacf761f	hypothetical_protein
77b8efe011a84bb17286b7af8ffcdd6f	hypothetical_protein
77c008abe63c093c987326d3968ac203	hypothetical_protein
7afb84ccdf44d77ca0077c8d3534b45e	hypothetical_protein
7b2a852e8efff410060b1a94bfaf9a8c	hypothetical_protein
7b4e8dbd55b590d4dcf965a08a2adb19	hypothetical_protein
7bce42d8445b995325861ec692e2581b	hypothetical_protein
7c319f13254bb0963a813dbd94803556	hypothetical_protein
7dc1e76a24c8faf655bcc2774082ba69	hypothetical_protein
7e2cdd05e152831d65cbc1378f0b38ee	hypothetical_protein
8092be43ef2decddf0464bd5086b3369	hypothetical_protein
80d3fd3857c2a8493c595418e53716dc	hypothetical_protein
8163a8a52b3ebd4efc2a624c6796153f	hypothetical_protein
825ec4a51e90260563e4786f1850ce66	hypothetical_protein
8312a1dc5c78cd22621c22966920be55	hypothetical_protein
83f788b99cf8195ae88e8c469bc835a7	hypothetical_protein
84441c8016a79b368b65aa38d70035e1	hypothetical_protein
84457545c233e62e4256034d9148c8ff	hypothetical_protein
852803f9f5b7cfa0da6244a813f727af	hypothetical_protein
858a49cc70972fe3a6a681e6f6ece7cc	hypothetical_protein
87a47bfa5d4fce6ba2433008e94d9f11	hypothetical_protein
89411ea3dac8af9cc736dba97a81e3d8	hypothetical_protein
8980ab972905a0822bda432bdfbb16ce	hypothetical_protein
89bf8ce10f35159c1905e7165c45aa88	hypothetical_protein
89f7034d60202ce9f5ec5731c46fc0e9	hypothetical_protein
8adb0b6f011d6542b897e2d518de977b	hypothetical_protein
8aedaac2ad77a7523e8c37c2bad89805	hypothetical_protein
8b3d2ccf3f7a93e3b1e65db16ea07263	hypothetical_protein
8b4e7a962c838fd2509e4af078261376	hypothetical_protein
8b963cdbf732ad00559969e8f6e928a8	hypothetical_protein
8c713ead4f7f75c459554b144db535f0	hypothetical_protein
8d2f92e6b743fcceb0edce75fa7c4385	hypothetical_protein
8d5844343eb9cec653e063263c6a777e	hypothetical_protein
8fb16863154930c1041276f958f0945b	hypothetical_protein
9045801b233d9cb8e60200c2d1eef156	hypothetical_protein
90eefbe2693c6dcfabf5824bcc7782e8	hypothetical_protein
9294c072bb939bfc2e94aa243db1e2d1	hypothetical_protein
92e825324a2826c81912df2fd9afca25	hypothetical_protein
92f81a4e0fc7d1b714fa8c97cd6ed13a	hypothetical_protein
936c67799949e4a800a0b500b6b86348	hypothetical_protein
93f8eaaa9e9b4077b3c9c9b3e7fa797e	hypothetical_protein
957ce9e0934d617e5d93d5946a34af72	hypothetical_protein
95cae0968755b451a114787966ac0b67	hypothetical_protein
96f97e8691a806d4844903819a540189	hypothetical_protein
9718e5ffd4e58918e7140758809bfab1	hypothetical_protein
98bc212ba70492fe2589fcf088f7963c	hypothetical_protein
99bf952c02d62dd54b43371547ffe71c	hypothetical_protein
99f741af1df72679ab794272725a27d5	hypothetical_protein
9a2ce0040e298e5c3d7a199b3a1476b2	hypothetical_protein
9aaae611284f798f7803f60662a7135e	hypothetical_protein
9b4857b5f6665172ef47b17f44d0e267	hypothetical_protein
9c0c5d814bca4e2c1aa31ef40d20fb4c	hypothetical_protein
9c19d07ab6336714391d760445acfd72	hypothetical_protein
9dfc37cbf6668d2acce1704dfcc1bd91	hypothetical_protein
9ee185a9f8664fa65205663fcb454eb7	hypothetical_protein
a0468abe394a39eba322699979b6f75d	hypothetical_protein
a069ef33ca130c7945f559887fb813bf	hypothetical_protein
a1e32ee270ac8e5601481ae95fe7e14f	hypothetical_protein
a28b805ecd96f02ee714b181166a40dd	hypothetical_protein
a298bba7d919f4c5a79f791705cb2fc2	hypothetical_protein
a53d3867529e28ccf50951a33676d1a9	hypothetical_protein
a5ca397f7bda15cb309cffec7429e18b	hypothetical_protein
a5d9748584e3f11f7025090ebaf93d39	hypothetical_protein
a7000147d1f74f0c5687ddbd1824b5f4	hypothetical_protein
a7f7cf4448f75715547c2a64f6956dc4	hypothetical_protein
a82166cc1c4d08108b70c02f2974c1bb	hypothetical_protein
a9a9cab8fb5cfb9acb3654faea649c56	hypothetical_protein
aa96c1a4befe162d904e770a4e465907	hypothetical_protein
ab070abd6d7aa08710e2b266c4984a58	hypothetical_protein
ab183d5777e89dd7a882047e0095e11e	hypothetical_protein
ae2ffdbeebb848a3f789e47f42cfde78	hypothetical_protein
ae8d6f1675ddffa188992a124b6d7028	hypothetical_protein
aeaf26c3b1320391b3841cb95ef6bd6e	hypothetical_protein
b1741fff91e83f33f3eca2692afbfbd0	hypothetical_protein
b206fd3a0792414b5027aeb4a8e7ba5f	hypothetical_protein
b267468be71e8234e3367b67e5f6f5dd	hypothetical_protein
b30e051342a158adf2c525fee8dce5d7	hypothetical_protein
b3906088f92937dc4264ac61b2dc894d	hypothetical_protein
b55acd991e87a3b50ea873c1d6603ce7	hypothetical_protein
b5f317e7ed97479c789527e7e2e1a57f	hypothetical_protein
b67bc334401b8239bd5d8323a6c60759	hypothetical_protein
b7e5d3febaa73fa32cae8b6168ae1520	hypothetical_protein
ba188f1d52fdb9c4adf69387fc681872	hypothetical_protein
bdb0c09793d52fe509ae5fa3e39ddaef	hypothetical_protein
bdfe8e314d11d030a989f699fd2cd53c	hypothetical_protein
be79753cedf6e8d430a98a3c4e68e481	hypothetical_protein
c063abb2cdd2c13923dcc0c5ca7cbe70	hypothetical_protein
c1aa5d0276abe9a80b352fa9a3e8c8a2	hypothetical_protein
c1b2c854695da2da69376056958edec7	hypothetical_protein
c282cc0b635f61c8b482e16bcab8fba6	hypothetical_protein
c2c2818f8416cc1f90b9391c3f0df864	hypothetical_protein
c35f7de6f06cf74212ae823ccfbeae93	hypothetical_protein
c3bb77f828d516c9e3fb845e1f74976c	hypothetical_protein
c4273549cabca316bf816a2e49df61ca	hypothetical_protein
c64cf3905f149ddeb0d3b3d77f276b60	hypothetical_protein
c68f08bce4f41d107af2f45f29bbc7f2	hypothetical_protein
c72766cf47bba2c3174bb1da1aaf0193	hypothetical_protein
c881fdad4b468aa7c4c681797553d795	hypothetical_protein
c9312cecf34a835b01d236723ade2f15	hypothetical_protein
ccbafc331150103cc95c1a2a5a847c78	hypothetical_protein
ce17e45e014ed76dd92d307e2c27dae8	hypothetical_protein
cf514da09d378ea5bc94f82bd748087e	hypothetical_protein
d09b1450dc0ba3b47ea68dd444e2fee9	hypothetical_protein
d0b33d9df55c1c353e0752e091cf35ae	hypothetical_protein
d12ea5e5e24fa1f681fb3fddc9d900e8	hypothetical_protein
d1af038dc1cac1bee74d3d6bf78b1be8	hypothetical_protein
d29aa964e239288c0cc6308ab85ee779	hypothetical_protein
d31649ee17b93ca6b00c72a3ee769589	hypothetical_protein
d3a493aa8e4f7caae5653f475d451934	hypothetical_protein
d5619b4267aef95ebf1e582ad4554c31	hypothetical_protein
d57bdcbbe341e99a0d91b528f4489ce1	hypothetical_protein
d6a44d905a98c429692e905ad290984b	hypothetical_protein
d6cb13c91eeab26a592898eab6631bca	hypothetical_protein
d74560f971bcafe4b48045e33a08e18a	hypothetical_protein
d8029f8ec003b130818dcd1912b72e81	hypothetical_protein
da066e0bdf28afa14db275bf8d6d6311	hypothetical_protein
dae928cffbbc1ea0eed5d3dec604ed48	hypothetical_protein
dcf43e91649b591cd88fd630df251b5e	hypothetical_protein
dd18a17c7727a541b32a4d21224400a9	hypothetical_protein
de1d6c5213be73c6590e1d0e7fd9b455	hypothetical_protein
de5e0fdeb77eea27af684f8e7910a406	hypothetical_protein
dff3b928acef3a2826f64005e4e9ef8b	hypothetical_protein
e087c14078b4f84233a8bf4f4213bf4d	hypothetical_protein
e1a317a15197a13c80958dc776a18943	hypothetical_protein
e3c5ef4e494581aab3b473375602fb31	hypothetical_protein
e3e18aad443e2d964958cb308f730855	hypothetical_protein
e3ffdc88f7a341ffcb614fbf597a2761	hypothetical_protein
e412e9ff580f4c77f5831fe156cf527d	hypothetical_protein
e513a687ea3f7bb8b13899ef43c8ef63	hypothetical_protein
e5e162a14ed30c9dfc310e75c8b8377c	hypothetical_protein
e64330c00809f3c5de713f21ac5d521e	hypothetical_protein
e6af5fee7f25f9a73c71324d86258228	hypothetical_protein
e7710055ddbffa5313081f2469d76470	hypothetical_protein
e7fd2a6be26dd7f084da03ea35cdd39b	hypothetical_protein
e8a71c94b7ba3bd0622448614a2300b3	hypothetical_protein
e8ac5d0da3efbfd016c2515acdda8e35	hypothetical_protein
e9109cab9d68b1c3357d08b9919743ca	hypothetical_protein
eb53c210653ea77aa5b5db42a672d167	hypothetical_protein
ec9c72ab27dc420fe4435297b4a1635c	hypothetical_protein
ed031ab09d88aff3bfe69d4948f58e5f	hypothetical_protein
ee8c141092263933ff3570cb490255cd	hypothetical_protein
ef2dfd86b590e680c3ed0aeb4d44dffc	hypothetical_protein
f03407805e435d9714acd56d74bf6fea	hypothetical_protein
f363fdfafe94002334cb6f6f905d16fd	hypothetical_protein
f5ba52ef74ee9241316340c06c1d76d6	hypothetical_protein
f623d9a35313646b74e7a34482c50edd	hypothetical_protein
f69aeb9ac5e17c0ba1da10fbbca0533b	hypothetical_protein
f83effcc59ac1e81e2ff2fc7e33ed2e8	hypothetical_protein
fb2f1e879cb1215956a7d6f97d3cfb88	hypothetical_protein
fba6a693e266c1bb6f69f95de3783d40	hypothetical_protein
fbba46fb73f2ac96deda5f799711df10	hypothetical_protein
fd66e205dac0a519c66230973d5168fb	hypothetical_protein
436ea38ea05bce7c32425cd31e7f0445	hypoxanthine_phosphoribosyltransferase
7ba89dbf3399526674bcce7a92ce1b3f	IM_pore_protein
fbeed9df5d956294afe9389e860616bc	IM_pore_protein
52849caf4b20ee7752e6fecd2db1d285	imidazole_glycerol_phosphate_synthase_glutamine_amidotransferase_subunit
cec7e052e5262f7170244406477077d4	imidazole_glycerol-phosphate_dehydratase-histidinol_phosphatase
3ba4d7c740af8dece5332b339abdd9be	imp_dehydrogenase_family_protein
69127552db6a6ea7e15ac5ba6ab52591	indole-3-glycerol_phosphate_synthase
89ffad0b0fb3f2d587f6073d929652fd	indolepyruvate_ferredoxin_oxidoreductase
c9657c719081facb000b72cce1dda7e3	inner_membrane_ABC_transporter_permease_YjfF
6cfcbca5fd17cdb39e5328a14ddce399	inner-membrane_translocator
b56c897c6e81ddcf54b126fabfc6df14	inner-membrane_translocator
d4c1c4933976ebb1e57a9d0cae23e773	inner-membrane_translocator
adb0ea59b5ba633b8f0648a43bf51f0b	inorganic_diphosphatase
fd1ecab7ad4abb4a42aac44c9de66e17	inorganic_polyphosphate-ATP-NAD_kinase
1c8f038b4d17ca939f653089f2a5a4c9	inorganic_pyrophosphatase
73615f14c329dcb812ce10590d5bebf2	inosine-5-monophosphate_dehydrogenase
54c5600079ac7809ccd261028e84fb95	inositol_transport_protein
f03325b29506a6953d097df35e66652f	integral_membrane_protein
c04da1bd49a6b9cb25006b9dc9209080	Integral_membrane_protein_TerC
026274bcbfcc7c6acb1d4bedc32fd016	integral_membrane_sensor_hybrid_histidine_kinase
d007ffc0e58c2a49d99aac2cc8b38cd3	integral_membrane_sensor_hybrid_histidine_kinase
54af6d433fa6780fcff7a408b1bbc9f4	integral_membrane_transport_protein
7b22bddd05bbf607e586f97f954f48e4	integral_membrane_transport_protein
d33a24905bd9e121914b256894bc3ab2	intracellular_septation_protein_A
f0aada5a98683fb332dabb27ba102811	intracellular_septation_protein_A
87f89b1c3ed581f25137380a2907d06a	iron_complex_outermembrane_receptor_protein
44757f10558a9aa5baeddbb1ad3c8fef	iron-ascorbate_family_oxidoreductase
f0a3a2b7f958dcc95c272e36996ccafc	iron-containing_alcohol_dehydrogenase
cabc63250fdb66606813c8cfda386c29	iron-sulfur_binding_protein
3a393b338f635792cede0448f5b99035	iron-sulfur_cluster_assembly_protein_IscA
16fbf8f7b9a0af2c28675803a443dc20	iron-sulfur_protein
15ebe43619ca4ea9b05d7b75fda8d762	IS4_family_transposase
29ee099280a28359177e08717a94e04b	isocitrate_dehydrogenase_NADP
b4359ffdd20f43908758ba961123c52e	isocitrate_dehydrogenase_NADP
a55b3283822d5a969265a29b814b66f1	isocitrate_dehydrogenase_NADP-dependent
56d8c91b0368b4e5932f49595c2ab9f0	isoleucyl-tRNA_synthetase
888b0bda2e9f1f44fa405100a8baa4b8	isoleucyl-tRNA_synthetase
92730772ec8df46ab427ba64f40b2b11	isoleucyl-tRNA_synthetase
9f4dae71f890939b4a5f2a0e9e1426c5	isoleucyl-tRNA_synthetase
acaeb462bded4b4b2e60191e63c4b3be	isoleucyl-tRNA_synthetase
adbcd77f0ccc82b8b773d87b8ac06d7f	isopropylmalate_isomerase_large_subunit
82a4fa98764089b90c03b8d01b422025	isopropylmalate_isomerase_small_subunit
13225c3a164707c9c6f9a8a20d6593f1	ISRSO17-transposase_protein
025eb94c23e56ad81b62f628957e580a	K_potassium_transporter
6f8f1d2a35000bb2463e7fa4c02094ba	KUP_system_potassium_uptake_protein
5c967777c2fa137ab489ad9ea5876520	L-aspartate_oxidase
6233990517130156f52e1ba8a9994852	L-aspartate_oxidase
64fdcf078eff8e8647fdd87ab9f62b36	L-aspartate_oxidase
2a6416b68d481451198b18133d3388f0	L-carnitine_dehydratase-bile_acid-inducible_protein_F
5630ddefbc25e56a43aab8353c19320f	L-glutamine_synthetase
ee9d61b211689b4a8e34399a41c22545	L-ribulokinase
2479290ef9df041e934195697972a61f	LacI_family_transcriptional_regulator
b0ef90e392bea5ee41f0359c124e4d2e	LAO-AO_transport_system_ATPase
8bbb6e9752c6938656689726ac68b861	large_conductance_mechanosensitive_channel_protein
decb2b7b2a9b1e8d6854f1b1699eb866	leucyl_aminopeptidase
2a7d4e38f67242046c89f2f7d785d4be	leucyl-tRNA_synthetase
cde282ccf0edd35dd17dec8acdc04eb3	leucyl-tRNA_synthetase
e387de13afea9bb054cbeb593e9028e2	leucyl-tRNA_synthetase
9f30b4cdfb794946f22eee4a91a47a61	LexA_repressor
07d81614e8e4eb5b6f6115373dbccc12	lipid-A-disaccharide_synthase
18cb590a3b66571e54bd34d8f791ba59	lipolytic_enzyme
9aea3ac350d00167a8c4a160129293dc	lipopolysaccharide_biosynthesis_protein
033fbc10e5405116687ec315351a683b	lipoprotein
4539be76c706e6b2b44a7e74c3a5897d	lipoprotein_releasing_system_transmembrane_protein_LolC-E_family
ff63f72f5a81f54ecb00e32d394c6753	lipoprotein_signal_peptidase
96a4c314bdf0d7ecf381cb2e97bf494d	Lon-like_peptidase
279c509017dfe6b8599faeab822247a8	long-chain_fatty-acid-CoA_ligase
dcfd42cbdbe6c2a6a64035b95e5412fa	low_molecular_weight_phosphotyrosine_protein_phosphatase
c8ecc3d295c5b306b41b4bd4bffd340c	low_temperature_requirement_A
6e855eabf1ecdec80001447cecdfa5d6	LPPG_domain_protein_containing_protein
a0c91af471cfa5fb754da2693864c22a	luciferase_family_protein
5bc6f56a89803f9543f3f50cb35842fb	luciferase-like_monooxygenase
34fab5992ea81a1dd773317c19d4ebff	LuxR_family_transcriptional_regulator
9999bbebd72cc85c5386a066b600de55	LuxR_family_transcriptional_regulator
9fd288623736e64e3bd652d9d96e72e3	LuxR_family_transcriptional_regulator_fused_with_ATPase_domain
305084b54d0c0492c9852247e6a86a60	LVIVD
445d345d70eb9429ff7608a39b8430cb	LVIVD_repeat_protein_precursor
c329da32f9f5fc90d0ac2d13ffeeaa1f	LVIVD_repeat-containing_protein
b5820a6bf5e14a37b258371ae2c4e5cf	lysophospholipid_transporter_LplT
46d104470b1f86b1ac7e700320f2540b	LysR_family_transcriptional_regulator
68bf3d1ee6963cc8db04adedd5bfd2f8	LysR_family_transcriptional_regulator
a979fc80455a89ab5d1d746684b60404	LysR_family_transcriptional_regulator
087622eed3a467e4f3e94ce1d75c4fab	lysyl-tRNA_synthetase
5184a45cf3a35bfd901bc004a5bb51da	lysyl-tRNA_synthetase
78be466a3abf40bdc889f7b0b4f9889f	Lytic_transglycosylase_catalytic
af44f665fa97e06b0b605f631fc801fe	LytR-CpsA_family_cell_envelope-related_function_transcriptional_attenuator
a71eb586d12413a31c47b1115f3e449b	LytT_family_two-component_response_regulator
8e6c8a4a6f7219d32ca5d9029b008056	M16_family_peptidase
b1a2e07c2f62cd8d143ccad672087abc	M16_family_peptidase
abee25b025f672076844b388a73ca770	magnesium_and_cobalt_transport_protein_CorA
0dbac304da9ef1d77daeba883605d493	magnesium_protoporphyrin_chelatase_putative
6a3257f25fc1758d99f138e5c3761d6f	magnesium_protoporphyrin_chelatase_putative
15fb4b7796c9b0832872c49aaf8372de	major_facilitator_superfamily_MFS_1
1adbe08845868757fbae8dbd9a87f299	major_facilitator_superfamily_MFS_1
257cb5f24f85cf13917686dbcffff08e	major_facilitator_superfamily_MFS_1
33e60640d12d13122fc71e5ba3584cf1	major_facilitator_superfamily_MFS_1
64e8846404f5a26ee3969b21aed5371d	major_facilitator_superfamily_mfs_1
f7833f83ca3e4a36daef356be1553255	major_facilitator_superfamily_protein
72b36ba367a21764e0c7c1820431afeb	major_facilitator_transporter
74193178e91cde65ba9a69e0a2be0ca9	major_facilitator_transporter
dc40b70d08013afa9c456dd69e44e30d	major_facilitator_transporter
e9550abeff4db0c003887307f2a41833	major_facilitator_transporter
fa81fba1774e01845b461df29916f2f1	malate_dehydrogenase
2f2dd8a1ec96051b43bde0cfd256ef76	malate_synthase_A
418f9f2ccb7f59ffe9df06854ca9cd76	malic_enzyme
b15cb28699266b2dc0cbdc30f3852a93	malic_enzyme
47482e6a52c82ecc697bb14276718ed6	malic_protein_NAD-binding
08d9885e6c5740aeb7e2cf84b03c9ef4	malto-oligosyltrehalose_synthase
90d12eb2b9baffc3519d23356d34da03	malto-oligosyltrehalose_trehalohydrolase
aefdd1a0c68a6eb42b8a40f79b5c4dbf	malto-oligosyltrehalose_trehalohydrolase
33bfa2c648240d0fbac9294abcc41d58	Mammalian_cell_entry_related_domain_protein
0be314c7b92d3e49be53d294deb5fce1	Mandelate_racemase-muconate_lactonizing_protein
0b9001031447829d24ce44d72a08658a	MATE_efflux_family_protein
d77d9948166b30c4190519b1d11d1bcc	mate_efflux_family_protein
cdbc6ddb203f6a7be17d42ec673d40c6	MatE_family_protein
7b80ef501f07243a39784fad5e783698	membrane_bound_O-acyl_transferase_MBOAT_family_protein
3900b5db8398a591273f91ccafcf5a4c	membrane_protease_FtsH_catalytic_subunit
736fe2917ad9db8e8b0abe5d3dafa52c	membrane_protease_subunit_HflK
d9d0f49969d68253acbf6a030d93322e	membrane_protein_insertase_YidC-Oxa1_family
27ae1400e3f1f087416588f780a49bf8	membrane-bound_proton-translocating_pyrophosphatase
a3d97442964ae409fd6323f483f6760d	membrane-bound_proton-translocating_pyrophosphatase
c918a95f704ea6cb3074107802be1896	membrane-bound_proton-translocating_pyrophosphatase
d51ce1ca15d5d2dfa0ac175ced6d0042	membrane-flanked_domain_protein
01bc47003763fb135110786f003ee8ba	membrane-like_protein
a7b726ad248509f899df048dfca3338b	metal_dependent_phosphohydrolase
7c40dc134c58e361681388ea3979b505	metallo-beta-lactamase_hydrolase_subunit
f7a9750b74d92604edc53793f93f2f68	metallophosphoesterase
ee1bada6613e881972580f3b6c9ea281	methionine_aminopeptidase_type_I
497f0793919eeb1f795c79c2c529aae6	methionine_synthase
6ce39fec7c7f61f773b1c0499a2f5891	methionyl-tRNA_synthetase
895a2dacbd6470f6b878c41e89d160bb	methionyl-tRNA_synthetase
9fc748628f0023b1fd052f204c198fd9	methionyl-tRNA_synthetase
0f4b1a56bbdf0cadb922f9ad0f3e463f	methyl-accepting_chemotaxis_sensory_transducer
d67720fa518a1730f1ac715e8c84223a	methyl-accepting_chemotaxis_sensory_transducer
4be7d1f06c631012894d980321e01a09	methyl-accepting_chemotaxis_transducer
683fca59b0ede1d765a703a502e8d0a7	Methylenetetrahydrofolate_reductase_NADPH
8df16cdbc429402afba73485942aa5fd	methylenetetrahydrofolate_reductase_NADPH
7dbf24891a8871246a41960b4af30dca	methylmalonyl-CoA_epimerase
a79574ec7b910b7248df8a300891f64e	methylmalonyl-CoA_epimerase
60de04ee46c0791f1c46d73136b66191	methylmalonyl-CoA_mutase
11ee547052e8264b5995963cc867546f	methylmalonyl-CoA_mutase_family_protein
27059afcb11cccd30a4e0d585b6cc877	methylmalonyl-CoA_mutase_large_subunit
315a1b54913d27f49e01aaed11e3a76b	methylmalonyl-CoA_mutase_large_subunit
3f570cb17c27e70aa13f10b9ebfaa951	methylmalonyl-CoA_mutase_large_subunit
6b569b131f887806d1c8887deb9dc427	methylmalonyl-CoA_mutase_N-terminal_domain-containing_protein
afc325bdd0723d8ed88f3481c4df2d03	methyltransferase_GidB
3fdacb7fec51a77a4b9b942f07aaec2e	methyltransferase_type_11
23241664493ddccfe9c000ad77fc56f5	methyltransferase-methylase
b17328dd22b2b14cfb3ea497b559b6be	Mg_chelatase-related_protein
611c0246d1d9b31212813191fcd2441b	Mg2_transporter_protein_CorA_family_protein
e8e7020e0c40a86662e01c6115834772	Mg2_transporter_protein_CorA_family_protein
e3713193cfa620067363fad53bc6afd0	MiaB-like_tRNA_modifying_enzyme
ab80ffe4cfa736fd3d5ef22c138148c4	MiaB-like_tRNA_modifying_enzyme_YliG
5e24f5de2cb4b34772dca9bd5fb31ffe	MIT-family_metal_ion_transporter
00067cb2d132cffb578537995d49887d	MJ0042_family_finger-like_protein
895a4f86b5765adb30e71178911a5daa	Mn2-Fe2_transporter_NRAMP_family
c142820fbccf23bb87c4429ed4d3c8d4	molecular_chaperone_DnaJ
a64e6f406275e80172e753cdd44dab58	molybdenum_cofactor_biosynthesis_protein_A
fbcdc5b4b88dd9d945742bd961a4487f	molybdenum_cofactor_biosynthesis_protein_A
7900713850c76e5f6563a89490482183	molybdenum_cofactor_biosynthesis_protein_C
24f68a1146e649fe0b65723ee38097e1	molybdenum_cofactor_synthesis_domain_protein
50bca4eeb0f9057b6515465e4ff06b01	molybdopterin_oxidoreductase
53ec0fd091d2c6cf85c70f8a73d90a3c	molybdopterin_oxidoreductase
779db89f07408205cc7f38058b16bc6c	molybdopterin_oxidoreductase
c9cee62a0a8a13bc87788bf6e5fc127d	molybdopterin_oxidoreductase
798663e9cd82ad22f014b1be62716b79	molybdopterin_synthase_subunit_moaE
ef147d321f2358fa2c832cf839e284e9	monofunctional_biosynthetic_peptidoglycan_transglycosylase
3f1c54e232dfb64e55a70e4b8450382d	monooxygenase_FAD-binding
437e7201d7bf66b08af9be63b5375f1a	monooxygenase_FAD-binding
34a71f90790c575dc5b493dffb9432ad	monosaccharide-transporting_ATPase
236a7ec9cb9de3de4f10a2505811df38	monovalent_cationH_antiporter-2
680207e068e4044cadb1043c8ac787e0	MOSC_domain-containing_protein
37b6aad3a7b5bd1e69a5f2e29394e016	MotA-TolQ-ExbB_proton_channel
a9815ea71056b753afd3c72bf24089e0	MotA-TolQ-ExbB_proton_channel
1f8f41c5c2ed350f1d412fc3d448e2cf	Mov34-MPN-PAD-1_family_protein
8308bb817f1eba1c489180624f07cd83	MscS_Mechanosensitive_ion_channel
094627b4455c18801bab544137a504d8	multi-sensor_hybrid_histidine_kinase
0d826ad97e34d99a9487ed736f8a15a8	multi-sensor_hybrid_histidine_kinase
e43ca58df6e7fb05751ddbec8b4d680b	multi-sensor_hybrid_histidine_kinase
2be123f4291c2242ebde04c80988ed61	multi-sensor_signal_transduction_histidine_kinase
4916bf4a47b17a3f16a8e08ac0713af7	multi-sensor_signal_transduction_histidine_kinase
5c54f04fa79e4365c3f5bef489214d38	multi-sensor_signal_transduction_histidine_kinase
68413afa781d881b806bf01f74572f50	multi-sensor_signal_transduction_histidine_kinase
c2edb638fb58a0866da5e3f054317105	multi-sensor_signal_transduction_histidine_kinase
f0b5d15305d564a6850118237a0ed1be	multicopper_oxidase_type_3
3a8caf884d3a18d2da1b6c9c77e29074	multidrug_resistance_protein
b5e709631d48d2710d0182e99412e952	multidrug_resistance_protein
06c9534273710c3695369d94f724603d	multidrug_resistance_protein_A
bacab181ffeef7128071a71778bfd265	multiple_antibiotic_resistance_MarC-related_protein
06efb509733fad31f0d44e3572875c48	muramoyltetrapeptide_carboxypeptidase
d898560e3323730e1c7648d0765bdff5	myo-inositol_2-dehydrogenase
ae9cadcdc93cedbbae668dd3e7b9c12a	Myo-inositol_catabolism_IolB_domain-containing_protein
873046c975589403037863bb2979b132	myo-inositol-1-phosphate_synthase
e0c01f4718408f0ebbb434dffd6646ac	myo-inositol-1-phosphate_synthase
265005668c79f2cd683cc1485e22f4c3	N-acetyl-beta-hexosaminidase
61a4d6ddfb053c05d84cfb0b4202b7c8	N-acetyl-gamma-glutamyl-phosphate_reductase
c669c34973546eb2ddd46a92c36a60a2	N-acetyl-gamma-glutamyl-phosphate_reductase
b05c718f708fc90356153a6e6ecbe10f	N-acetylglucosamine-6-phosphate_deacetylase
29c007abf54d765d051509c33b77b726	N-acetylglutamate_synthase
5fda48c600b10178b1cfaf716e035262	N-acetylmuramoyl-L-alanine_amidase
8293c838f8e930fe118305230bfe2b8a	N-acetylmuramoyl-L-alanine_amidase
689122d906442c56db82843349b3461e	N-acyl-D-amino-acid_deacylase
286ab18a14f81c6021f6574e5f4ed135	N-carbamoylputrescine_amidohydrolase
447051b3336a348ca0773cee0c8f8578	N-formimino-L-glutamate_deiminase
2339c1e85920536c5245f0ec55e1c3d5	N-formylglutamate_amidohydrolase
7e3a67fffc7879758098322730049b24	N-formylglutamate_amidohydrolase
0854438b6d530fffcd105f7c898c4ecc	Na-glucose_symporter
ab802c17e2a45e84cd321234bc6ef928	Na-H_antiporter
48bcf0cf972c95ff4bf467d7325b30d1	Na-solute_symporter
cf1de016730e017c4c3acc2f761a6a0a	Na-solute_symporter
def77ed5495e4430436affe649ca5e5e	NAD_synthase_glutamine-hydrolyzing
a1744d26f8ce063543991d645897d3b5	NAD_synthetase
254499345b4505debbdf9a39c4b4b84d	NAD-dependent_epimerase-dehydratase
440d73091e125d8b79fde0f5ca335662	NAD-dependent_epimerase-dehydratase
5cdc8e178a17b8d7ada845db4fb53065	NAD-dependent_epimerase-dehydratase
b29d34a0831bba4c352cf7d3903f9b35	NAD-dependent_epimerase-dehydratase
b39dd725b6806e2fecadc14f15eadee3	NAD-dependent_epimerase-dehydratase
c52586c5c6b301e8b7e485e3c52845ef	NAD-dependent_epimerase-dehydratase
f6a3ff39b40746d7d98f5cde622df0f2	NAD-dependent_glycerol-3-phosphate_dehydrogenase_domain_protein
41a6a567bf5240da9ad4d5037580ee89	nad-glutamate_dehydrogenase
b64583c00e9f64ba37c37cf2f61c019b	NAD-specific_glutamate_dehydrogenase
a02d38b58520d9122722e1aa34900e15	NADH_dehydrogenase
458e367e42857cf57cd2e60bfde4ff71	NADH_dehydrogenase_I_chain_A
00ef11cce8184db447122bd2ce2a180f	NADH_dehydrogenase_i_d_subunit
1a385c2254a661fed6c1a307d0fb0931	NADH_dehydrogenase_I_D_subunit
8c6a70e9b0974bfb15f91d3b71a6a2f8	NADH_dehydrogenase_quinone
9c659ab5605cdd74eaf0b8000a035e10	NADH_dehydrogenase_quinone
dd07cd6c3dd7d4cedaab4365a920049a	NADH_dehydrogenase_quinone
fb3b6390225ca70f1229251eb71af4c9	NADH_dehydrogenase_quinone
1155957480611216dfa3e533f32f12ec	NADH_dehydrogenase_subunit_C
7c8b778bb088ff4642651079cec06882	NADH_dehydrogenase_subunit_G
7510d932dcddaf7de5f1280c0c4bee71	NADH-quinone_oxidoreductase_chain_B
8c3d2ec8fb879e17828b27d55a9c0f7c	NADH-quinone_oxidoreductase_chain_F
3cf3a1c5b119c6f94abc2a931e6f3af1	NADH-quinone_oxidoreductase_chain_G
e7537e6331be719dacc4f874b9ec522f	NADH-quinone_oxidoreductase_chain_G
b033033e911aa9ab03fcae5336b5cb09	NADH-quinone_oxidoreductase_chain_N
5bad5e9decba2395f1aac367989e0cea	NADH-quinone_oxidoreductase_F_subunit
3ce1ec2814f0525ea8ccff56468901b0	NADH-ubiquinone_oxidoreductase_chain_H
b63838e7c9cbe2310d671644e0d4cb30	NADH-ubiquinone-plastoquinone_oxidoreductase_subunit_6
d18739234eac55c687b138a25bfc4510	NADHflavin_oxidoreductase-NADH_oxidase
04b350c63e6d538d245ef1e06a1d6c6d	NADP_transhydrogenase_AB-specific
9883f4091c0abc1be4f35461726ce389	NADP_transhydrogenase_AB-specific
aa0639481a907045b4048be8a26c48f1	NADP_transhydrogenase_AB-specific
2cfa5b8ac14a158281f484f1eee251bd	NADP_transhydrogenase_beta_subunit
081b05d5499c957e0b254d4a995275d8	NADPH-dependent_glycerol-3-phosphate_dehydrogenase
b0e9de3b7c05f5e2dec239ed7983f80c	NCS1_nucleoside_transporter_family
2bb71463019518f28b94ea33be0c1c80	negative_regulator_of_AmpC_AmpD
d79e22df8266e0d2169296e0a211d465	NHL_repeat-containing_protein
1720473232fe1a39af92641828a2e42e	nicotinate_nicotinamide_nucleotide_adenylyltransferase
81f1bf3568137270921bce936e86b5ff	nicotinate_phosphoribosyltransferase
1b4c635af2a8f43fb10571bb52d92f57	nicotinate-nucleotide_pyrophosphorylase
a73a831d1f2957bc38ca686cdc61936e	nicotinate-nucleotide-dimethylbenzimidazole_phosphoribosyltransferase
559ac97d7020fcadf60fbb1821b25ca9	Nitrilase-cyanide_hydratase_and_apolipoprotein_N-_acyltransferase
097baadac070dbf7436dfa2be7ed2d55	Nitrilase-cyanide_hydratase_and_apolipoprotein_N-acyltransferase
f3bf08b3385d8be2fd5f10a46e9b3b38	Nitrilase-cyanide_hydratase_and_apolipoprotein_N-acyltransferase
916d169e9e8ab6995f7cc542ada93bbb	nitrite_and_sulphite_reductase_4Fe-4S_region
2d7d218ea7ee711b85b641fae9dd68d7	Nitrite_reductase_cytochrome_ammonia-forming
0ab13daaaa2263022ced715d6af593c5	nitrite_reductase_NADPH_large_subunit
ad1c25e1c9d4efe8624bef4155a5880c	nitrite_reductase_NADPH_large_subunit
5e5dd3dcf56686e5ead6bf1faf257c22	nitrite_reductase_NADPH_small_subunit
46a61336801363065d43349b40883fc7	nitrogen_metabolism_transcriptional_regulator_NtrC
106a28ee70ff2b3d9680241a1eb0e5ed	nitrous_oxide_reductase_apoprotein
c201f43460527edcf3cf2416cc965665	NO3--NO2-_ABC_transporter
2c69cffe5b08e26083efb05e448d828c	NO3--NO2-ABC_transporter
34161f8d6d8ab9bb968aef8fcf3f0e7c	non-heme_chloroperoxidase
8a8ae9007eaf90b23eb02b8d9b732c09	non-ribosomal_peptide_synthetase-polyketide_synthase
1b4decc29d5338db32321bcdb711f100	non-specific_serine-threonine_protein_kinase
d0615b1413b75ef5824a80989473c590	NrfD_family_oxidoreductase_membrane_subunit
269444fe20bc0e041e5dd7fc8d799932	NtrC_family_two-component_response_regulator
7fd6be32a2a36acdde21809d2e313dc2	nuclear_transport_factor_2
0a8eab4c3e56c43909469e4a6040a51b	nucleoid_protein_H-NS
9b53e3a3471357f6d764f6ae94b205cc	Nucleoside-diphosphate_kinase
6311bdb83df04b8898d637e9350049b5	nucleotide_sugar_dehydrogenase
76dd4692b1bb889e3fdc4dd0adba46e4	nucleotide_sugar_dehydrogenase
f83943945d6e7f2b381c3d2e8f3474a6	nucleotide_sugar_dehydrogenase
0b0ef50a293b08c78b0d7d5cb3c7b560	NUDIX_hydrolase
3e0384be98bcfe84a646585f32dbbcbe	NUDIX_hydrolase
5d9db23138a9a11048bb648f4041004a	NUDIX_hydrolase
f8eeadeb8f1ae7d7496fd7468099a31a	NUDIX_hydrolase
7551f3867f576716d4858d76b1380b93	NusA_antitermination_factor
9273510c29551f484e461121221d02fb	NusG_antitermination_factor
439b5ce0ddc386f27be044f08ad9b1ec	O-succinylhomoserine_sulfhydrylase
e74e8ec8de9db7f686f37e098222fdfa	oligoendopeptidase_pepF-M3_family
5d7c64dcf7e55a348c7e9813aa277bf8	oligopeptidase_A
903d565ae6d729f7a6c597f103dbb723	oligopeptidase_A
07ee238efd5b2d1b32fc50c12e7a57dd	Oligopeptidase_B
92790604a78591962b433fc8930a7525	oligopeptidase_B
e7f237d51146f4a002c475fccc72e047	oligopeptidase_B
44a799d358a1fd3e69f327816ebd51cf	oligopeptide_transporter_OPT_family
97cdebf0e8384eab1f8ed76e8bca9d68	oligopeptide_transporter_OPT_family
703d3f2aa30d8aca30fbe5a44d1afeec	oligopeptide-dipeptide_ABC_transporter_ATPase_subunit
c2025fa2cf44fb6fb3c92f7059f173d0	oligopeptide-dipeptide_ABC_transporter_ATPase_subunit
f7eb80c7b1c6ac23a33b8c9106f79c34	oligoribonuclease
f908874aa5607671337231f13f1f1700	Organic_solvent_tolerance_protein
db0806aedb4c258cca81587b1afdc02a	organic_solvent_tolerance_protein_OstA
fb575be0fed39053b99c9e92a4fc8173	Orn-DAP-Arg_decarboxylase_2
08c5617440a0379502f965b20f6cbc8e	ornithine_aminotransferase
7fb4db84c0cf4e85a767d878a56d7cf7	ornithine_carbamoyltransferase
87334ee14461fc55061aa90fadcdc27a	ornithine_decarboxylase
bf2a364c1c03fcf848e7f2b1045a6014	orotidine_5-phosphate_decarboxylase
841287632d9ba3e8f0f5bf4630e52770	orotidine-5-phosphate_decarboxylase
2f1b47c7fa13eae919220a14e7f3d8a5	outer_membrane_adhesin_like_proteiin
219c103a5e5ba542ee9a5281e7a1db3c	outer_membrane_autotransporter_barrel
334003f6b73a9a73b1150abe70c25c2c	outer_membrane_chaperone_Skp_OmpH
05120aca2b8156139500fa66f6bef47f	outer_membrane_cobalamin_receptor_protein
2dd83a2403aacd7f647062a6d98f96ef	outer_membrane_lipoprotein_carrier_protein_LolA
f17408e4a3e0ef2aa81825957b935861	outer_membrane_protein_assembly_complex_YaeT_protein
8fc71a3e5af85596548347aac5118498	outer_membrane_protein_OmpH
83d8c5d881b84b94b2efd19fcc9016e1	outer_membrane_protein_YtfM
a6235eeac844ecadf96f273fbce50979	oxaloacetate-decarboxylating_malate_dehydrogenase_NADP_phosphate_acetyltransferase
1a0802f900db7c63c230f58df7385590	oxidoreductase
ad56700fec422caa3c66da489790c5ff	oxidoreductase
db7e1aebda10186d5e37e9ffa3411b78	oxidoreductase
26ce789a61cce53c25e4790dd7712a4f	oxidoreductase_alpha_molybdopterin_subunit
520a5dfe00642272392bf01bb597c7d8	oxidoreductase_domain_protein
db67f74e9183390761057b89dd4bb5ed	oxidoreductase_domain_protein
e2756d0b915e0ca0499c3790fac6afdf	oxidoreductase_domain_protein
0ffe845aa20180b5f6735941d2d36fc2	oxidoreductase_domain-containing_protein
8a408059356f2fbb7b5020018afe646a	oxidoreductase_domain-containing_protein
a17d6d69d06147e92a01e7cb8153eb6b	oxidoreductase_FAD-NADP-binding_domain-containing_protein
2ea7eb86b5ea5cd1c6eded16adb44bba	oxidoreductase_GMC_family
1407e0a207b73b22f5f845e2eb7aa63b	oxidoreductase_nad-binding_domain_protein
babe5e99111970b7428b3b578398b770	oxidoreductase_protein
0fd60c3a28382feaedf122477ae73a0f	P1_ATPase-HMA_domain-containing_protein
c2e6ad1d932161ab4ac43128429aa6a2	PaaX_family_transcriptional_regulator
2cc53d89dd9001c2685d47b46ff7489e	pantetheine-phosphate_adenylyltransferase
f2c3b286cb3a813039f002f692d1442d	ParA-like_protein
2676f98a855429fc9514ec6249aaba5d	parB-like_partition_protein
2c5b4ec7f95d75f727bd3b6c796b9b1c	PAS_protein
a15c9813156e91bfcb3f20a9d782f420	PAS_sensor_protein
13cfb18a6c77527e68cb156e3497dfcc	PAS-PAC_sensor_hybrid_histidine_kinase
3b76d553e26942a3bcec6d346c883ce9	PAS-PAC_sensor_hybrid_histidine_kinase
adeede85bd4ba6eda3a7e71711c499a3	PAS-PAC_sensor_hybrid_histidine_kinase
76c05e130ea0be3d76429b7d2d0c681e	pas-pac_sensor_protein
41854c1a3f7ddaae634535ed150e37c5	PAS-PAC_sensor_signal_transduction_histidine_kinase
0c0bf0a1cb6779c491969def8678b06d	patatin
092861ee8c890a835a4cac435920d45c	patatin-related_protein
64928f20607c6a6dad69402d1d2e4558	penicillin-binding_protein_1A_family
bb3d2fc56b990b6b547a71b925e26a11	penicillin-binding_protein_1A_family_protein
46a277c1883257278df403eb3ab4793f	penicillin-binding_protein_1C
8348ae564f3dda849185ce4fb2fb9355	peptidase_c26
e3a67efef6c6b03e9c673b18cc397eb3	peptidase_domain_protein
0ef4e7e91ad4c479c6da19f0882bccbd	Peptidase_M1_membrane_alanine_aminopeptidase
468f7123270d6257888ec0d0acfd42d0	peptidase_m1_membrane_alanine_aminopeptidase
fb97944d7d6a5a6f01847954330ace7d	Peptidase_M1_membrane_alanine_aminopeptidase
6c1ad8193a93ac75a9e35c04dab41bcb	peptidase_M14_carboxypeptidase_A
c26f1e5ae041c2465d950f920cedbbe1	peptidase_M14_carboxypeptidase_A
67493ab94ca1931ce24be7251cc949d1	peptidase_M16
9dad619663dff9f9ea2692b814f9bd0d	peptidase_M16
0dfc4e6fdc148d0a1aabb90b01b0cb86	peptidase_M16_domain_protein
451014850c9344ceabbba670ea104909	peptidase_M16_domain_protein
8cac9d3e670653e9d35227336aaea730	peptidase_M16_domain-containing_protein
de90dc15df2d422dd2fbba6003c77332	Peptidase_M16_inactive_domain_family
b2c6a969b43f66ea854147dcd39b14fe	peptidase_M16-like
3d6100aa38dbdf2511e5ca86814db3fa	peptidase_M17_leucyl_aminopeptidase_domain_protein
a872f3f2d132ca3a9d608da719124861	peptidase_M20
c0fcf234d73553af830a4c0a9326607a	peptidase_M20
64197c67a7d5b17540e5f5a2b500be9a	peptidase_M20-M25-M40_family
08431d8875a5d3761cb23adf24d9297e	Peptidase_M23
0f6964a126f545fdf881b5dbb85f9ca4	Peptidase_M23
c1128064ab5c94a79ca60b45dd638a53	Peptidase_M23
4ebd621f56212dd1f8d2391a21ebc7be	peptidase_M23B_family_protein
abfff4bc693264e29fbeda62153a91f0	peptidase_M24
f7f4e4ffeec8e1721a2d51fa9837ac43	peptidase_M24
c017e3540e95dc41c978ad3b1b9bfcc3	peptidase_M28
f8024e2682a4e91523f8128f014660e4	peptidase_m28
cea0f3f56a6498ac6e86d45643ce81f5	peptidase_M42_family_protein
3acf707ed0550dd30af38885a432eb3b	peptidase_M48_Ste24p
3debf96c1eb1a4f060462281f2a1252a	peptidase_M48_Ste24p
6737bb9387f9b834d0fd0bf7142f8ca6	peptidase_M48_Ste24p
038e42ae13e2947b27310bbc464b5fbb	peptidase_M50
297ef8d5c852e96807116f9b2b42d0ca	peptidase_M50
ab2e5610c08fe499f8fab5b2a8138353	peptidase_M61_domain-containing_protein
0fa6925dfec953796ddcba1f94afd78f	peptidase_S1_and_S6_chymotrypsin-Hap
3e308db0b679e853923a66cea4767cfa	peptidase_s1_and_s6_chymotrypsin-hap
769ed15a94f459cee23de88ffa422129	peptidase_s1_and_s6_chymotrypsin-hap
86e1de5cf3093685adf6e06cbb07613f	peptidase_s1_and_s6_chymotrypsin-hap
45c3b11b2978bda9bdea74bf9d30c3f0	peptidase_S10_serine_carboxypeptidase
0a057b1432d7523904b3b199a221d641	peptidase_S15
1420c3c078676aa6fbf979ab06c29674	peptidase_S16_lon_domain-containing_protein
01e74723e128cf47ac225f0cc3342ebe	peptidase_S41
bd850333aa0b51a44e293936723c581b	peptidase_S41
3b6be771dd826c81130fc19f6071d251	peptidase_S49
21f518604e8436ef6b354fed2ded1abb	peptidase_S8-S53_subtilisin_kexin_sedolisin
26c90ad8f0dbc6a9d27e0e2488313082	peptidase_S8-S53_subtilisin_kexin_sedolisin
0ab5eb2fc8dda1fb70bfa147a377ae89	peptidase_S9_prolyl_oligopeptidase
4f486010b685bed46bbb514067299a40	peptidase_U32
d7c23816ada4c83a8053246d42baf692	peptidase_U32
00069c9b8f428de5e587aeb8b5185ddd	peptidase_U32_family_protein
0fd3f2d9d2c6a687a6699b9c81324173	peptidase_U62_modulator_of_DNA_gyrase
41dc2fe4e5de0dc713926e9269c52aca	peptide_chain_release_factor_1
a1d8fe0809cea0c90af527d1638984cd	peptide_chain_release_factor_1
7afcb9ed1a324281219b4609e3ccf30f	peptide_chain_release_factor_2
cf37cc41c378c3f31313393d4b28d1b1	peptide_chain_release_factor_2
7e7daeb12f0564375de8b570b99b4ca7	peptide_chain_release_factor_3
90378e0053d93ef4de50e89bc9e4c933	peptide_chain_release_factor_3
c408fe65ebe68a6e0bfb517c0062f248	peptide_chain_release_factor_3
810a59eb36bbdffdf2581ed78f71d2dd	peptide_chain_release_factor_RF-3
45b34b2abde350d3a0efb371d324b72a	peptide_chain_release_factor_rf-3_protein
51059333b2a391e2df72eb882698d1c4	peptide_deformylase
8a1324fabce73fe2e7a91826130c77e6	peptide_deformylase
4a066249789dfc31334e57c2ef86fd29	peptide_methionine_sulfoxide_reductase_MsrA_Protein-methionine-S-oxide_reductase_Peptide_MetO_reductase
483d36f1f238f78a211510f64e801639	Peptidoglycan_glycosyltransferase
5f3f25d0be36022d8bce2eb843abf54b	peptidoglycan_glycosyltransferase
3641992a12e3db64e1397fbdec692c56	peptidoglycan_synthetase_FtsI
ad198a8029d15aebc6e455aa658f0f6a	Peptidoglycan-binding_domain_1_protein
f334fda8f81cb8645f23e601a7673f72	peptidyl-prolyl_cis-trans_isomerase_D
3b7b3a6bf7ae026dc6dfb5262b746041	periplasmic_beta-glucosidase
0fe14f63707709120896813feef4aaec	periplasmic_binding_protein
82943c85469be4e5786199a350756cda	periplasmic_protein
63d9bc8c806150ea00ce9bcf28c5b6db	permease_YjgP-YjgQ_family_protein
76306734a10e3a682e3723f0a5c9b5d6	permease_YjgP-YjgQ_family_protein
4aff3949dc3a76c5931e60fae66b16e3	PfkB_domain_protein
2cf9af9cb814587c69e05d103d9f8cb0	PfkB_domain-containing_protein
932ed32fd522043fa04e34335b87b964	phage_major_tail_protein_TP901-1_family
12188b5693ef809c7d015aea4d8242d6	phenylacetate-CoA_oxygenase_subunit_PaaA
1184d5aa7d6ba7b6d5ecb17d30a63d51	phenylalanine_4-monooxygenase
09d731d876c71be15b6a169a0b7b41a4	phenylalanyl-tRNA_synthetase_alpha_subunit
26aa327d7dfba2fdc7cf9ead89dc30b8	phenylalanyl-tRNA_synthetase_alpha_subunit
dc1f8da4325a8fcc785e98682c7fd2b4	phenylalanyl-tRNA_synthetase_alpha_subunit
db5db463aa3e60d451f633b81b93607d	phenylalanyl-tRNA_synthetase_beta_chain
4638e6d4bb733567366c88e6ac0108bd	phenylalanyl-tRNA_synthetase_beta_subunit
d229b04fdd49687cdba37d7e97856536	phenylalanyl-tRNA_synthetase_beta_subunit
5d443a55a746b5b5ff272867c0ffc1ce	phenylalanyl-tRNA_synthetase_subunit_beta
e0af25c3934df28e795bf24c744f438d	phenylalanyl-tRNA_synthetase_subunit_beta
e2402e703091c3a9511f02e5dac21feb	PhoH_family_protein
73aa273dd23b257290f75d112a39b1ba	phosphate_ABC_transporter_inner_membrane_subunit_PstC
159023e58e7483cfe0952ee97bcd1cc5	phosphate_transport_system_substrate-binding_protein
968ca45d73b1c1dc82c9cb1467669043	phosphate_transporter_permease_subunit_PtsA
29595de3100fdb3afe4ecba2f1505ff8	phosphatidate_cytidylyltransferase
57b109a107cb80327ba28d6a11a46b2c	phosphatidate_cytidylyltransferase
bb8b68d5a50c9dc043361b5ba92f5444	phospho-2-dehydro-3-deoxyheptonate_aldolase
ed35864fa27486d68bb2c656c12b7d32	phospho-N-acetylmuramoyl-pentapeptide-_transferase
f11ba9306f8a7e5ccad97c161f97c084	phospho-N-acetylmuramoyl-pentapeptide-_transferase
40707911b4f15e52d1f14b55472842ac	phosphoadenylylsulfate_reductase_thioredoxin
7e4fe33b9ea2d0172f0b06821097bf6f	phosphodiesterase-alkaline_phosphatase_D
749c9dd52674f6a78e0c1fc3d503997b	phosphoenolpyruvate_carboxykinase
305babf90b44af35bbbd5a17f6b6ddc8	phosphoenolpyruvate_carboxylase
803f01ecb71f55da13656c6d72af57a4	phosphoenolpyruvate_carboxylase
a6e2b5e4dd376574ad020da02e18a04a	phosphoenolpyruvate_carboxylase
4d2a1919c7a70acddd53c7a00a5bbd9a	phosphoenolpyruvate-protein_phosphotransferase
2992334eacd4979bea29747db864b630	phosphoesterase_PA-phosphatase_related
5d9c4100edf80792c8a052cc2c1fbb2f	phosphoglucomutase
4056ac7e4f8540f97cc548874c57e255	phosphoglucosamine_mutase
36b88959daef9cc303742090d7ec502a	Phosphoglycerate_kinase
96ceeeb289e3a1892de19c2f579f875a	phosphoglycerate_mutase
0763d2fd8bde4067f8f57fc9bca272f1	phosphoglyceromutase
649e90a27605751b31a32ce9999772af	Phosphoketolase_pyrophosphate
32360266b3aba6fd4fcd6c5fc00cb1a7	phospholipase_D
322a5c8bde1fec8bd16174d8b10acd30	phospholipid-glycerol_acyltransferase
8235a5a869e6a6b63ff411d45268b8aa	phospholipid-glycerol_acyltransferase
a4b8920c58ee52bafaf82940d5ab6993	phospholipid-glycerol_acyltransferase
0ce792e77ff2ba0ffe62b7e1f921d718	Phosphomannomutase
1a807a9105a0a60b872c1619b4089fb9	phosphomannomutase
3c69bd0c433dc7f5e444d1033983445e	Phosphomannomutase
610aefc90646c53bd087e181c2a78c3a	phosphomannomutase
ee90a7de28a3822bbf5acde212215a63	phosphopantothenoylcysteine_decarboxylase_-_phosphopantothenate-cysteine_ligase
09ca2da83935cb57d750540d84ee32d1	phosphopantothenoylcysteine_decarboxylase-phosphopantothenate-cysteine_ligase
03bb39ea235a0deaec3f78592a356b98	Phosphoribosyl-AMP_cyclohydrolase
929a0ba79ba04abdb11ac3275264dcba	phosphoribosylamine--glycine_ligase
4c49a0d8a0504399a15dfe59d5027bdc	phosphoribosylaminoimidazole-succinocarboxamide_synthase
0d3949f4001da4c37b7c8919171974bd	phosphoribosylformylglycinamidine_cyclo-ligase
88692fae2b28753de4877188be2e6d27	phosphoribosylformylglycinamidine_cyclo-ligase
9cf9a7ac493b11d88f507c0301c536d6	phosphoribosylformylglycinamidine_synthase
d53d2d97f85a33e36f4231a1c85b0bc8	phosphoribosylformylglycinamidine_synthase
9ba55e51193fd8e550845df9ec529875	phosphoribosylformylglycinamidine_synthase_II
c6f58213019acb5ce8294075bb1766d5	phosphoribosylformylglycinamidine_synthase_protein
1dc36acc051bc0871f51541d8eb10983	phosphoserine_aminotransferase
5d807fba92e4f1e38291486d742dd768	phosphoserine_phosphatase
145bdb34c9f54113efbd58d829cf6b6c	PHP_domain_protein
7597b9b265c836a07142afead2597832	Phytanoyl-CoA_dioxygenase
2402c9ce034247efee8f08b74eb2aa49	Phytoene_synthase
d239b3cfeb945df5a03668ba2659b201	PII_uridylyl-transferase
514103f2f8ab3e39f639f28ea982bb49	pili_biogenesis_ATPase
59e807f0d3517114cad3fc5b143718de	Pili_biogenesis_ATPase
e6e95c9e27a9d09396dfeb31afa5cc21	PilT_protein-like
13d350b94444b903385856f12519d529	pirin_domain-containing_protein
15d29af8f8d50db4dfda88d848a8a0b2	Pirin-like_protein
b6bf1b3b7c13cf2c16aec95dde8d41f8	PKD_domain_containing_protein
cbdce9ed218c7a3dd35aad7e4b547e97	PKD_repeat-containing_protein
2b675a845b35c9bc17c6b30dc99bf278	plasmid_pRiA4b_ORF-3_family_protein
5ce2ac67ef454ce7534c5eccc0b1e571	polar_amino_acid_ABC_transporter_inner_membrane_subunit
2646f7e32d4b5203090191bc927ec383	polygranule-associated_protein
30a6ac9cf8187970307bfd484035b6c8	polyhydroxyalkanoate_synthase
5623a5636e5a72f0120fff237d61d1b3	Polynucleotide_5-hydroxyl-kinase
1f1b079d8357838a6a17cfc2325d8d94	Polynucleotide_adenylyltransferase_region
29a4d38e88c9bfc033806ad2b9c24f1d	polynucleotide_phosphorylase-polyadenylase
72b00201d9002b6354d5de28b882f873	polynucleotide_phosphorylase-polyadenylase
0f7a68aa5ebc76107d2e99d7d02bf833	polyphosphate_kinase
3c25cadbc566d6e6fbfeb945fbb3f94a	Polyphosphate_kinase
e7619730dc4c253c3d6b94b129b26a2a	Polyphosphate_kinase
b720cbd5d05f81aebd528aaad39fef5d	polyprenyl_synthase
c96f1d4c512bc36fa7ecad028458d195	PolyR-hydroxyalkanoic_acid_synthase_class_I
5d4b541d327364913ad7854b10f7fe12	polyribonucleotide_nucleotidyltransferase
37835c2b472b1170d01c1c10feaa0922	polysaccharide_biosynthesis_protein
422b56600303cf6c3e6789934d6cfd74	polysaccharide_biosynthesis_protein
8918890e956ecc139c28a11574144cd9	polysaccharide_biosynthesis_protein
b41a170170eae3699e3961c07139b544	polysaccharide_biosynthesis_protein_CapD
8048fbb42754b56b3021f5921712976a	polysaccharide_biosythesis_protein_putative
6249b87eb5f40640d4003ad5f8337ac2	polysaccharide_chain_length_determinant_protein_PEP-CTERM_locus_subfamily
6100bbdce395f8fe375c99653becfe55	polysaccharide_deacetylase
fd0b62a7017a2cb05ce61a98ce52c5e7	polysaccharide_export_outer_membrane_protein
8bc1264a7c036f97723a63113c2ede94	polysulphide_reductase_NrfD
be8285d00b41c00a33d20bab2666c680	Polysulphide_reductase_NrfD
8b226d92822f246ad24684c2911ecf90	porphobilinogen_deaminase
9b02458959c22f2939499cfae243f16f	porphobilinogen_deaminase
35b3610d8ea8d4eaf2ce6ad19bfe909a	porphobilinogen_synthase
a567c7ef35cf916091e0bb14542a8734	possible_metallo-beta-lactamase_family_protein
07b7177bc51466369bf07274cea5f9fb	possible_TonB-dependent_receptor
022f5f32ca5f78d522b77fdcf500f042	potassium_uptake_protein
1aa4f8ea37901414b5e5b3b8293eaa76	PpiC-type_peptidyl-prolyl_cis-trans_isomerase
4fddeb16371be7ff046f58726d6ea15e	PpiC-type_peptidyl-prolyl_cis-trans_isomerase
05a5067c51681f365c9f82a3089507b7	pppGpp_synthetase_I_SpoT-RelA
25443190e83c9a356abcb8a612746588	pppGpp_synthetase_I_SpoT-RelA
2c3378c69a42f524c713f90d61b57ae9	pppGpp_synthetase_I_SpoT-RelA
2e3dacc73d16ba2c78e4d0d706252b68	pppGpp_synthetase_I_SpoT-RelA
1643ff33cf67bd920b4306e31f897936	predicted_aminopeptidase
e6f297c2b85c4022bc04839675865f70	predicted_permease
acbbd9896b6f58f9b15cd48db478ea01	prephenate_dehydrogenase
412e6f94228facb2660820db80441111	preprotein_translocase_SecA_subunit
4a89a43c085b7764537cc76f7981f0b0	preprotein_translocase_SecA_subunit
6e2934ab9f8e73bc658ddaae509d5c15	preprotein_translocase_SecA_subunit
72c8d91a35017b39559e11c4180753c5	preprotein_translocase_SecA_subunit
24dacc0f8bf79b81dfd904ac356fad8a	preprotein_translocase_SecY_subunit
f1a35ecdff418f6e136eb20578aad201	preprotein_translocase_secY_subunit
297c1a0623aafb1387b6c9609f3b9d71	preprotein_translocase_subunit_SecB
d9a3cbf887ead935507c22d26c776cf9	preprotein_translocase_subunit_SecD
c2451dca7f8aa812ec71c61527ca18c8	preprotein_translocase_subunit_SecG
0653a10fd0f0d8fd04b73ee63624a92c	preprotein_translocase_subunit_SecY
a4b8dd888e77d133bcad1b408191916b	preprotein_translocase_subunit_SecY
f20909e02b52444c999405b7525d3cc1	primary_replicative_DNA_helicase
1a3309fe741674d6046c77d46951d30b	primosomal_protein_N
6f3c20d7c407d5276f69fc45426cb8fc	primosome_assembly_protein_PriA
53a7ae32ad3db1c6fba7a164a0746f84	probable_alkylhalidase
4722450a18187c0f04ea9b47ccfd1b08	probable_aminopeptidase
b0934a83f1bd407d6a8f5577a7d52dde	probable_integrase-recombinase
b134d3364b5988cc988204b8df8b7a68	prolipoprotein_diacylglyceryl_transferase
27de7af64cfba08bb1f1988a9c41e0ac	Prolyl_oligopeptidase
1240b5f16f6e6f759c31cedeb5148207	prolyl-tRNA_synthetase
14f54f485f2d93a14031490360533481	prolyl-tRNA_synthetase
8524db6a686ffa466962d8291783dc69	prolyl-tRNA_synthetase
153410815640cba17ac0690dfad25374	propionyl-CoA_carboxylase
[truncated: 763 more rows]

## Sheet: Soil_Core
M5NR id	Annotation
5dfd4daaaf2b40609333505c3b7171ea	1-phosphofructokinase
c68f75b6c60523fe6dd97dafffa72a60	14-alpha-glucan_branching_enzyme
c6ff78d786d1e1dc3eab341014cbeffe	2-isopropylmalate_synthase
bca4b0f2fe7ecef666f1287ba161ead4	2-oxo_acid_dehydrogenase_E1_component_alpha-beta_subunit
c999eb4be039d683a7102d8637e11aac	2-oxoglutarate_ferredoxin_oxidoreductase_subunit_beta
85b169c5461d4260f1920ef14d656260	2Fe-2S_iron-sulfur_cluster_binding_domain-containing_protein
8ea462826b4d027c9bf5e35b0da21815	3-hydroxyacyl-CoA_dehydrogenase_NAD-binding_protein
49654362e9dbd6e2f6acbf82830c144a	3-hydroxybutyryl-CoA_dehydrogenase
40c46bf8dbf265ed8af49bfecd2ca3bf	3-isopropylmalate_dehydratase_large_subunit
da8120332f9dfdced7e44f0a75d37d26	3-methyl-2-oxobutanoatehydroxymethyltransferase
1244d93e0afb7e9bf53f377076cf3ec0	3-methylcrotonyl-CoA_carboxylase_beta_subunit
0cc697930a76453682b0c52165da9f37	3-oxoacid_CoA-transferase_B_subunit
bbf66040d87e092f86fe8c6bc0033ed2	3-oxoacyl-acyl-carrier-protein_reductase
dea1fb8b51ce70603e755771c42eaff4	30S_ribosomal_protein_S11
0a2755667053d665a91a420e8e8a717c	30S_ribosomal_protein_S3P
32eecd5d2c616acadea80c8d5b84a7ab	30S_ribosomal_protein_S7
382a252105dd1c88cdea086ec4564914	34-dihydroxy-2-butanone_4-phosphate_synthase
af1bc98fcd6175565e6635af937fb57c	34-dihydroxy-2-butanone_4-phosphate_synthase_-_GTP_cyclohydrolase_II
c10ab4c5fae03807c7c120ff6b1e1b11	4-alpha-glucanotransferase
2a78fc4de15a5ba8ec5367f2ae179c3e	4-hydroxy-3-methylbut-2-enyl_diphosphate_reductase
98ba76b0cf1014e599910c3b6e4bdc3f	45-dihydroxyphthalate_decarboxylase
e75e39cabec74f833709267a5c0f77e3	5-oxoprolinase_ATP-hydrolyzing
36a090d3263a903b28918f571288b78d	50S_ribosomal_protein_L14
e8e57a7a6c4a9f0b476e629598dc70d4	6-phosphofructokinase
d437bb06adf371ce4d413ca179fa9b59	60_kDa_chaperonin
90ffa1fc4833afe26d44b8b0dd7fda99	ABC_transporter
00ecbd520c178b1965fab3ba7a4edf39	ABC_transporter_ATP-binding_protein
72475ceb5824dad5f430e3629aa706b6	ABC_transporter_ATP-binding_protein
01f30e48e4804b8bd1294798c3b08c13	ABC_transporter_binding_protein
21630931fa344ad007eb7a06dde14f29	ABC_transporter_peptide-binding_protein
67c4bdcea1a378427fe023af2aa6155f	ABC_transporter_peptide-binding_protein
0c0d40a54902ecd8351a5eb722bbff74	ABC_transporter_permease_protein
306b2544a050055402721c9df37d42bd	ABC_transporter_permease_protein
e6628d56ad4de4addc303811b146f902	ABC_transporter_permease_protein
f92bb2b26b1447bd95de8ed84b090020	ABC_transporter_permease_protein
7f8014e829cf2a01803596125467cd1d	ABC_transporter_related_protein
8c5d91c2b76d46eab9333ea0e620ebdb	ABC_transporter_related_protein
db56941e31b0333d19400678eebe4c2d	ABC_transporter_related_protein
f38ae0ae4c33f2d1fe452fdf27416a68	ABC_transporter_related_protein
f88c43214d814692f8dcff5b3bc67167	ABC_transporter_related_protein
352693e04f8c167e1a34b986c97ba6e8	ABC_transporter-like_protein
d133a4fe89cdc3144d14cdec91006acf	ABC_transporter-like_protein
17443ab2f622f42c05f31ecb214d3224	ABC-2_type_transporter
253a99b863032b8d83486ba2f80ef1a2	ABC-2_type_transporter
8bb9eb50eb5e399f7a6bcce25d6c3cf9	ABC-type_spermidine-putrescine_transport_system_permease_component_II
26b35a44def9a992258d519b416dad7a	acetolactate_synthase_large_subunit_biosynthetic_type
a4fb77e3bc715f4b6b8e28fd532b5343	acetolactate_synthase_large_subunit_biosynthetic_type
56d3922a9385ec8ac9908eb50195506b	acetolactate_synthase_small_subunit
1a50156424c6f0131d413980f2ce6bc9	acetyl-CoA_acetyltransferase
4b125401bfa99a757469c0ba19c63345	acetyl-CoA_acetyltransferase
2141b8fb3b1ba0f469d4d52dfb510d7b	acetyl-CoA_carboxylase_biotin_carboxylase
a981841c705e24f437be40b5683bb094	Acetyltransferase_isoleucine_patch_superfamily-_like_protein
62a30dcdc9628f2a9131ee7e2db034a9	aconitate_hydratase_1
d3bfbfafb0b896baab17742985079e3a	aconitate_hydratase_1
d9329b222f936f31bb858351bd46a314	aconitate_hydratase_1
2e33e70c2ab4d2420c7c5943a47abaa4	aconitate_hydratase_domain_protein
cce7aeb749007a3909d90db1cb7ef72e	AcrB-AcrD-AcrF_family_efflux_transporter_inner_membrane_protein
810e80b702fe77d03fac17bfff12e822	acriflavin_resistance_protein
964076617f62fee823b9dfd3a4a21702	acriflavin_resistance_protein
58928177692ebd003c41d304b20c2f41	acyl-CoA_dehydrogenase
4ac512dc3ae94184b9d749f9a035d171	acyl-CoA_dehydrogenase_domain_protein
4ce0f441beac7fa26356c77758479cb4	acyl-CoA_dehydrogenase_domain_protein
f155b3305288b647699ad700fef02d92	acyl-CoA_dehydrogenase_domain_protein
f696fa710b1024c603987b2e64ee11db	acyl-CoA_dehydrogenase_domain_protein
f9b6499da830da2b8184298e8aa1a5e9	acyl-CoA_dehydrogenase_domain_protein
39e442bf2d4bb17397de59622b9ae00c	acyl-CoA_dehydrogenase_domain-containing_protein
3cc810cc9960b0b95517251e2fb2db83	acyl-CoA_dehydrogenase_domain-containing_protein
3bd594e2d8de33050a17eac5c80a2a63	acyltransferase_WS-DGAT-MGAT
888936952f87364a34c425b84adc1f42	adenylate-guanylate_cyclase
4edab638281a05c4ec84082a2a2277ca	adenylosuccinate_synthetase
3212f1efc4e64fdeaff5c205d6ef062a	agmatinase
33bd3d7a03c94eaf4ae330b360e5a860	alanyl-tRNA_synthetase
536c1bf1b1348c8b204dbeaf2280e54c	alanyl-tRNA_synthetase
ffb688deb49156e70ce59454d16d50a6	alcohol_dehydrogenase
6f74bd595c5173c0cb6edf62f5c9b678	Alcohol_dehydrogenase_GroES_domain_protein
1e4507bab977bd047eac397ef6bdd56c	alcohol_dehydrogenase_GroES-like_protein
8b88b186fa8b13049684497c25f4c5d5	Alcohol_dehydrogenase_zinc-binding_domain_protein
587efc11ba547a5863defd5bfda73727	aldehyde_dehydrogenase
bf6b675e887cee59ac631d5db0cc48cd	Aldehyde_Dehydrogenase
4f2a124e2c3803f4d33e2d259b906d68	aldehyde_oxidase_and_xanthine_dehydrogenase_molybdopterin_binding
996420422ac7a526d5ab5b76744e6e7e	aldehyde_oxidase_and_xanthine_dehydrogenase_molybdopterin_binding
5e2d78e6ec3bcfe5a8da584e18370b03	aldehyde_oxidase-xanthine_dehydrogenase_protein
ada6a84d468e7eb007bd97db0b9a5a9a	aldehyde_oxidase-xanthine_dehydrogenase_protein
7c02f7486181ba5f3621cb5a7b5038db	alkanesulfonate_monooxygenase
78e654bad5017ef1d069240bc8d039ba	alkyl_hydroperoxide_reductase-_Thiol_specific_antioxidant-_Mal_allergen
5674289c3dc5db203fa372bb31748faf	allantoate_amidohydrolase
d28cb3760efc4f92e9eeb4b3848027df	Alphaalpha-trehalose-phosphate_synthase_UDP-_forming
3c1a9a7f96b914a07547c4e76089f7e7	Alphaalpha-trehalose-phosphate_synthase_UDP-forming
bd826b8a166a6d72fae6bd2b672639e5	amidohydrolase
0c8b82cd5b595563f3e6ee760bfad5de	amidophosphoribosyltransferase
4000048f788b79a665fea9f55be481e6	amino_acid_adenylation_domain-containing_protein
7b1053bc009e1e0d6099cf2214358314	aminoacyl-tRNA_synthetase_class_Ia
95731403b7e2c489acb4b7d9bac68e32	aminopeptidase_DmpA
9a560797c668862f81475a3d3b025491	aminotransferase_class_I_and_II
ce0493d903785e273b77e73d81f9da19	aminotransferase_class_I_and_II_protein
b68286f32c908f6fbc6bc9d4038b80bc	aminotransferase_class_V
ba088f6f968ce9d34f13b7156e48302c	aminotransferase_class-III
bbf148f5b2aa055919bfb51db86451ef	aminotransferase_class-III
a5968c18535e8e35fea98ccdcb861045	ammonium_transporter
15fca09bea5e6f4f613814d746e760cf	AMP-dependent_synthetase_and_ligase
667dae2c5610d6420f67c41d4db88511	AMP-dependent_synthetase_and_ligase
883d808da021d9064b17637fae7047c7	AMP-dependent_synthetase_and_ligase
8ee193de6e16b19087d2dd0f5c4d8af1	AMP-dependent_synthetase_and_ligase
4ca4ed9fb9858b6492d1725aaa5ab3ac	anthranilate_synthase_component_I
d9822510038686e65077171bc1585fc3	anti-sigma-factor_antagonist
383f75774e25d6442a91ba26c802916d	arginine_biosynthesis_bifunctional_protein_ArgJ
cad30afb56b689a8c5955a5da1e3e042	arginine_decarboxylase
ab23b46a53f6e950174ec4d8edd6f8c8	argininosuccinate_lyase
70c90e2e18486e58aa652a7cacd1da43	argininosuccinate_synthase
2bb51d0e871a715cb8a8202ec98357ec	arthrofactin_synthetase-syringopeptin_synthetase_C-related_non-ribosomal_peptide_synthetase
0da00e5200596f5441c5c0a0fbf38786	arthrofactin_synthetase-syringopeptin_synthetase_C-related_non-ribosomal_peptide_synthetase_module
3a049da628806c09da521ae3f974cbaf	asparagine_synthase_family_amidotransferase
47763095fb49ac738a4e6fbc942d7c12	aspartate_ammonia-lyase
86c502ddfe349c732126906a096907f2	aspartate_carbamoyltransferase
87a97f6ce481dd12151cc6207b1320a3	aspartate_carbamoyltransferase
03caa477219081cf61f55771c1d99ffd	aspartate_kinase
8fc7d87ffe9a7bfbdc2eb6f24e8aec27	aspartate_kinase
5e343361fe30073067b4e40ae56872c4	aspartate-semialdehyde_dehydrogenase
01c7c77214a42a6e00d6835d2cc7d45b	aspartyl-tRNA_synthetase
aba3d11f70d0892e9d10c6c59f3f758d	ATP_phosphoribosyltransferase
856f8b777d01831fbf3b770f73b631a7	ATP_synthase_F1_alpha_subunit
13a0842d79b4a4c658c66ec6ba8490bb	ATP_synthase_F1_beta_subunit
a0f4ea31cf4da697e21936d6b0d4b533	ATP_synthase_F1_beta_subunit
33a09381347f1416bf58bbf774fced3d	ATP-binding_protein
bb98f0fe374d6c1331f2b607270561a7	ATP-dependent_carboxylate-amine_ligase_domain_protein_ATP-grasp
9b16f330d228ffb65ead441a5c8615dc	ATP-dependent_Clp_protease_ATP-binding_subunit_ClpC
f04ab3ae4c73d02445ed2f804a342806	ATP-dependent_DNA_helicase
efe877e892a1ec507ac4017b46140081	ATP-dependent_DNA_helicase_RecQ_family
e768aac06a189d40f3c48d02daa6ae0f	ATP-dependent_Lon_protease
0f6b3ce12f3908d5d8aacb38773fbf44	ATP-dependent_metalloprotease_FtsH
9b4246cf6ae9722e12ba955adb3c03d9	ATP-dependent_metalloprotease_FtsH
43aa3a8111f86672a9efe9c3002947c3	ATP-dependent_protease_La
9d072848ba2f2fbbf3a6ceb5b93471b7	ATP-dependent_protease_La
b255dad2c50ae2231d0a91a6f645eddf	ATP-dependent_protease_La
c201c2d6f502ce8951e217cc250b88be	ATP-dependent_protease_La
a87d3cbc7fa22056d1ff7cf7d329ad9b	ATP-dependent_Zn_protease-like_protein
d58fc81b4caeed243a18d03380c55f41	ATPase_associated_with_various_cellular_activities_AAA_5
5788510b87812eba7e11d81685fd7de5	beta-glucosidase
864684f0e09c33424a91fb4403dc2d57	beta-ketoacyl_synthase
7e0e1ddf58b7f4c4b43039bd786c4a40	beta-lactamase_domain_protein
4afa044310016b5b9f719f8c3e2463a9	beta-lactamase_domain-containing_protein
9402f307c026400461e1be523d06cb87	betaine-aldehyde_dehydrogenase
edbc3f1446e3a003146c052e12d47b77	betaine-aldehyde_dehydrogenase
1b115937d4d9ce364ba519436d3d03eb	bifunctional_homocysteine_S-methyltransferase-510-methylenetetrahydrofolate_reductase_protein
72a116af44b0c5fb0f5c209ad19bcdae	bifunctional_P-450NADPH-P450_reductase
e7b72d495bd6b121b2bf1e55fb64da57	branched-chain_alpha-keto_acid_dehydrogenase_E1_component
7f3e0990ae0091cb9ab57c6a960e5462	calcium-proton_antiporter_CaCA_family
868fb276005e98a6f769d2fe85fbadfa	carbamoyl_transferase
b2baa0f576b02706b2d0d8fe0347c473	carbamoyl-phosphate_synthase_L_chain_ATP-_binding_protein
54dc6e55d4343922ba2ce77c10095d66	carbamoyl-phosphate_synthase_large_subunit
842b424a3bb6148070ba018f4c585cb4	carbamoyl-phosphate_synthase_large_subunit
aebe06cbc8f71b26feb6ab94265dbc90	carbon_monoxide_dehydrogenase_large_subunit_apoprotein
2f0efc5cde469616284d01406008faef	carbon-monoxide_dehydrogenase_large_subunit
4f6e43cca2b049a10108f8106c9307ab	carbon-monoxide_dehydrogenase_large_subunit
6f9e63c408ef7ed23addaebcd670255b	carboxyl_transferase
5dabe531fbc594c109a1bb925d59a9c9	catalase-peroxidase_HPI
585eb23ae962de91a54682328e02424b	catalytic_domain_of_components_of_various_dehydrogenase_complexes
d30fc841cd1058bf4f7d83c60b81f443	cell_cycle_protein
40a4fc2d0d2e10b0f7e72f7068a0aeaf	cell_division_ATP-binding_protein_FtsE
093a456111b8fa50cf6840f1046e84ff	cell_division_protein_FtsZ
88f3caa8f0664ca4f1c40005908fd164	cell_division_protein_FtsZ
5a2040f6ed7b0a79a4f0345102672c32	cell_shape_determining_protein_MreB-Mrl_family
e51edec3f0e4055e42acb57a2a213702	chaperone_protein_DnaK
2bfcd2c6ed97c20e5eca346369382505	chaperonin_GroEL
9ee6ad2975b627b20a3ab972a6393b1d	chaperonin_GroEL
cace6fd0930184271cc23726b9919b8e	CheA_signal_transduction_histidine_kinase
6734a113d2bd444e22c1354b184717b7	choline_dehydrogenase
a70a3f1c9753318e891f7cad4b13b923	chromosomal_replication_initiator_protein_DnaA
2a32a1677452b9773beb18fa262842ad	chromosome_segregation_protein
e036e3d02839c87cf25f85128a309863	chromosome_segregation_protein_SMC
019a76a6c737f5589bd91e0b54638147	citrate_synthase_I
3c052631f85610fc481c0ed540793e2c	CoA-binding_domain_protein
eae1b74df102452fc0eba22e74e03a7a	CoA-binding_domain_protein
51e2b1ee0601f412ca084373bcfddc6d	CoA-substrate-specific_enzyme_activase_domain-containing_protein
2a1a117d6b1454f1579c18bb4c77f77b	CoB--CoM_heterodisulfide_reductase
37c7bb3eab38fe5b9691a5110107a908	cobyrinic_acid_ac-diamide_synthase
74e866e44fc0291e3d0f8b84f5a0623d	Cobyrinic_acid_ac-diamide_synthase
168d7270dd135a907e8e6ce3d2c606b5	crotonyl-CoA_reductase
4a2488c9891500751149b7ea82c959f7	CTP_synthase
5ff422508fa5bd7900183baeb0084b31	Cyclohexanone_monooxygenase
b71597ad30616b331538388b41e0aaf9	cysteine_desulfurase_activator_complex_subunit_SufB
c54e231d1d2515d0f5d3bf416e86b423	cysteine_synthase
06432a505c86eae7f504bdc1d8c644fd	Cytochrome_b-b6_domain_protein
fc1b17150f149f43c4f26b6a31bdf57e	cytochrome_bd_ubiquinol_oxidase_subunit_I
9ea4bb1e6f337cf427a5d07d6d9490da	cytochrome_c_oxidase_subunit_I
c166ddfb01205ece20c6a6a39db6ecb8	cytochrome_C_oxidase_subunit_I
792f4b2184a77226b805cb98053dda6f	cytochrome_c_oxidase_subunit_I_Heme-copper-type_cytochrome-quinol_oxidases
3a9fa34c2943aa6da4e05bf7fbf120c5	cytochrome-c_oxidase
95b8acf3d75b85b4f98cf1d717a0c3ae	D-3-phosphoglycerate_dehydrogenase
89d0a146f0d070bc55c151fb71f2aeaf	D-isomer_specific_2-hydroxyacid_dehydrogenase
41cc051202db8b368caf0fcda612649b	D-lactate_dehydrogenase_cytochrome
c95507af6d13125e3c2503ef9f9da294	DAK2_domain_fusion_protein_YloV
43863351e9b18bb61ecd4211192046e0	DEAD-DEAH_box_helicase_domain_protein
3e9040a7b43dc73222f606ab251e3cbe	DEAD-DEAH_box_helicase_domain-containing_protein
3a85d8a3d95971fdf95436cb6f71961f	DEAD-H_associated_domain_protein
4a7e9b0663c93c1664187d617e169d9d	DEAD-H_associated_domain_protein
e3ef5386862e8ec11ae794515604ae3f	DEAD-H_associated_domain-containing_protein
196468b4ef44faba5a8871d6200e8e28	DEAD-like_helicase
19c3b7308af31070dfc3a41d941d310b	dehydrogenase
f6249bba4f089329b6ea605e56c98b8e	dehydrogenase_E1_component
219d6bc09964d1030c617d2b089131f1	diaminopimelate_decarboxylase
375d12d1cfc33d5e7cb234058881204c	diaminopimelate_decarboxylase
b1220e7ee4ee271e499bef792276d6ff	diguanylate_cyclase-phosphodiesterase
833adaa2ea0893144e3ec551e182d1b9	dihydrolipoamide_dehydrogenase
a02e75d3a01c48e9bc29d8254b229f8e	dihydrolipoamide_dehydrogenase
4b0e8dac69cd49810a189a82396994be	dihydroorotase_multifunctional_complex_type
2508d11eaef40f17894fe2cd1be8b22d	dihydrouridine_synthase_DuS
0bf168508e8e1237d0044e2952328c19	dihydroxy-acid_dehydratase
8521a6e1c4857aa6d7e01dc8f939ab19	Dihydroxy-acid_dehydratase
718adcfce0fefb82a80d81d2e325f413	DNA_gyrase_A_subunit
8e25b6dcd5e6a9d9ae97edee6057d1f0	DNA_gyrase_a_subunit
322a82de5131839457408894fd3e96b1	DNA_gyrase_B_subunit
5785a784c1ba4cb85544976c8321d6c3	DNA_gyrase_subunit_A
cde3846bc74fd051df05f2038e30797b	DNA_gyrase_subunit_A
2fa0bf26fe072ad55e8283f68c371969	DNA_gyrase_subunit_B
8840e0da6c147f1757fbfe0e73a3239f	DNA_gyrase_subunit_B
4dff957d2a439ba9ff5266dd15954350	DNA_mismatch_repair_protein_MutS
2d5a4fb9b7867379f4670008927713e5	DNA_polymerase_I
1e3f969af28746c3b6355a135170d7c4	DNA_polymerase_III_alpha_subunit
ceb0260a0eae46cfa131a4839f1b30ec	DNA_polymerase_III_alpha_subunit
e2b7e050d7ea99d8fc1135aa8e531cc1	DNA_polymerase_iii_alpha_subunit
13c18a913dac8c0cd06a1e65f9e93b0f	DNA_polymerase_III_subunit_alpha
503ff09995a8c7ffa9dcc6f8a7c224fb	DNA_polymerase_III_subunit_alpha
5794e20090a631e7c639bbbd836a2139	DNA_polymerase_III_subunit_alpha
6471f2a3de584c4a929cc6bc0757c3bd	DNA_repair_protein_RadA
99340dc71f753c304d1b41f62193f6c2	DNA-directed_RNA_polymerase
ba0237680ed089aeb1b9d2c228969bee	DNA-directed_RNA_polymerase_alpha_subunit
32872eaa9f58043ed0d8b67b52cbd4b0	DNA-directed_RNA_polymerase_beta_chain
26d0b8edaeb3442b789381eaeec78522	DNA-directed_RNA_polymerase_beta_subunit
5102319124704de3edd074d8b2c18012	DNA-directed_RNA_polymerase_beta_subunit
746613567b1c58710671e126330500dd	DNA-directed_RNA_polymerase_beta_subunit
899f4fa65c0ca3d4c5a809267049aee4	DNA-directed_RNA_polymerase_beta_subunit
b2c89c9753752a81b14f11862b630572	DNA-directed_RNA_polymerase_beta_subunit
fdd2fdfbc9f5c6724d30f649596a2306	DNA-directed_RNA_polymerase_beta_subunit
94125c996ef33dc1c4ace343c6ab6ff3	DNA-directed_RNA_polymerase_subunit_alpha
0914414a6505d66bbc829714ad396f01	DNA-directed_RNA_polymerase_subunit_beta
2cfd462ecd419a4c7270591f294ff17f	DNA-directed_RNA_polymerase_subunit_beta
2eb37abc7718ec8cef10e1cba4fe9a45	DNA-directed_RNA_polymerase_subunit_beta
8cda304078ae2e9dfbacd9da02a71642	DNA-directed_RNA_polymerase_subunit_beta
48d238f1bb6a0b163d496dd4652be973	DNA-directed_RNA_polymerase_subunit_beta-prime
2a2ba3b58090c419217f3303be2dd632	DNA-formamidopyrimidine_glycosylase
192a2f7ea6d6709f10dd20b5ae8added	drug_resistance_transporter_EmrB-QacA_subfamily
1894ada794ee1aba9e07802c0280b3d9	dTDP-4-dehydrorhamnose_reductase
379590553b846e19d9810e789e4c41b6	Electron_transfer_flavoprotein_alpha_subunit
6b04cb8d72b218a70261c2e65ea9fb98	electron-transferring-flavoprotein_dehydrogenase
332fba42ba49403cff446ff89fbb1488	EmrB-QacA_subfamily_drug_resistance_transporter
0d5154aeb563020b36d3793fa6f28107	endopeptidase_LA
0b21a287576c2db74ad0ac9fc8982247	epimerase-reductase_putative
0c14edb799d099b2a13742f1177955b4	excinuclease_abc_a_subunit
80aac9c7cd31505d07f46adf05ea2a7f	excinuclease_ABC_A_subunit
4cfb8b779de73c96a9062512bb67f30b	excinuclease_ABC_subunit_A
61c6f41f0cddfc4117ea2ac83ff0c789	excinuclease_ABC_subunit_C
bca1806a4df8072aba1bcf2763509168	exodeoxyribonuclease_III_Xth
234c3e64c215614d2425943bf1117ba5	FAD_dependent_oxidoreductase
f4a7be1d9ccc076a9f66e09bd5f9797f	FAD-dependent_pyridine_nucleotide-disulphide_oxidoreductase
38958c1c33b8d51bbc7a8dbab289c1a5	FadE1_3
f0eb952f66f54c8fd277344e163b92d3	FeS_assembly_protein_SufB
f2a3bfb9b08cb5357aa9bd52e743af3a	FeS_assembly_protein_SufD
94b7b233fcac47dabc833be52df71c0b	flagellar_biosynthesis_protein_FlhA
dc62272b7b875340979e06b5a4d04e1e	flavin-containing_monooxygenase
39a3ac5dac28d3e7e984e27b34b8d9d4	formate_dehydrogenase_subunit_alpha
3cf7d64afd309d88c94b13387b11eb91	formate--tetrahydrofolate_ligase
4373709360874b85620537a2f0924ee0	fructose-16-bisphosphate_aldolase
6313d2505d8d73ca7e85959f1802119e	fructose-bisphosphate_aldolase_class-I
f404a0f5d34c1575541175ad28185181	fumarate_lyase
5573454491cb84818ad9bdc16fc7fc7f	fumarate_reductase_iron-sulfur_subunit
03783373e1a730b10ead79d3f66797e6	GAF_sensor_hybrid_histidine_kinase
141ab788552a99768a6e0d6d3847541b	GAF_sensor_hybrid_histidine_kinase
4f37c20d2940ce5e9e1ab35eba0ebda8	GAF_sensor_hybrid_histidine_kinase
6ca009f78e823fbbe0ddaea083b588c2	GAF_sensor_hybrid_histidine_kinase
a1bba4607dc159aceaad8a05f5375e6e	GAF_sensor_hybrid_histidine_kinase
dfc79be87d545512d2010847b62f98b4	GAF_sensor_hybrid_histidine_kinase
b1115c11be7dedb68b8ace5c58aab4c6	Gamma-glutamyltransferase
352b11e750b0304e66e5a5e291574967	gliding_motility_protein
b85762a94760a3a911414272fd5c7f15	glucan_14-alpha-glucosidase
57eea33be839f817b1ec73f37d9d8b79	glucosamine-fructose-6-phosphate_aminotransferase_isomerizing
31415fcae2904728180b0b62a073d385	glucose-methanol-choline_oxidoreductase
f0407b12981cf57d08b1dad23661fd8e	glucose-methanol-choline_oxidoreductase
53e7a9fc2f3a3b0391f77f3389d0d512	Glutamate_synthase_ferredoxin
65963b798566a7f08a9c6ea78f1b52de	glutamate--ammonia-ligase_adenylyltransferase
32f179d61344653dfb97a165c88c68da	glutamate--putrescine_ligase
f4b8506dcfa620fe9bda8c747985bfcb	glutamate-1-semialdehyde_21-aminomutase
31a6384801d17307d065898906ad0d7f	glutamine_synthetase_catalytic_region
3b7be2756294e4ebfbd1202db46aec4f	glutamine_synthetase_catalytic_region
0d1a1a36e6c24bfc39d3b4dfe21ba6ba	glutamine_synthetase_I_glutamate--ammonia_ligase_I_GSI
3d40447f8e6f061b4cd50ccf39ebf1d8	glutamine_synthetase_type_I
321f4e769dd53eb770f8faf983546a33	glyceraldehyde-3-phosphate_dehydrogenase_type_I
53e249d71e6faf1b6870fb3b7d83dc05	Glycine_C-acetyltransferase
50f25fea916978abe34b3c6e836ff34c	glycine_cleavage_system_T_protein_aminomethyltransferase
f052b96ab53aeff843842e73972ebb92	glycine_cleavage_T_protein_aminomethyl_transferase
6ae956ba6bf5f8852b91dae941479bc5	Glycine_dehydrogenase_decarboxylating
9012d5d9cf9acf7effc101805321a74b	Glycine_dehydrogenase_decarboxylating
29f255c1267184fdcbb0722a9be9c13f	glycogen_debranching_enzyme_GlgX
94d18321f22ae26fe0f2e91e730f6353	glycogen_debranching_enzyme_GlgX
1cce3680e7aecd81d82d57084cb427b2	glycoside_hydrolase_family_4
cb98dadee356b17c9270ff4234bd86b4	glycoside_hydrolase_family_65_central_catalytic
c6d22006f9bc538fca396845c40c81d6	glycosyl_hydrolase_92
954945c1f4c9e5dc16dcdcd22df3a7f8	glycosyl_hydrolase_BNR_repeat
a65111d0ef59df5d6dbfe343627f880e	glycosyl_hydrolase_BNR_repeat-containing_protein
f56f40b2c947091fdd6fb3ebb4fab450	glycosyl_transferase_family_2
9f55e05a1e39cfa2b7ef8e0258533f42	glycosyl_transferase_group_1
333ea0343543bad48f386a0f7fb0d21d	glycyl-tRNA_synthetase
03a06341936a0615175bba42b7aa5b1a	GMC_type_oxidoreductase
272ed233bdac987e504ff56b48e37d85	GMP_synthase
39ac844c6ea1be0b1aaa9859c9a4da5c	GMP_synthase_large_subunit
d6fce2f3a5d971a40d87cb96f40bc554	group_1_glycosyl_transferase
5b1fb6a824e828faf922f875d9516d8a	group_2_glycosyl_transferase
6b4dbe3fcc6bf73824c1938497bf5742	GTP-binding_protein_EngA
9bda7177a12f104f6f2da60481a794ed	GTP-binding_protein_LepA
1fd4b89afefd83a1b8ed7a3c8a94fb1e	GTP-binding_protein_TypA
4b473154769b0aca4974be31877e0205	GTP-binding_proten_HflX
53900acf98ed051dae49078f76908013	guanosine_pentaphosphate_synthetase_I-polyribonucleotide_nucleotidyltransferase
520cce901498269599d19ef995fea005	HAD-superfamily_hydrolase_subfamily_IA_variant_2_HAD-like
32037c0b72599e7ef3a0f3cd17317364	Haloacid_dehalogenase_domain-containing_protein_hydrolase_type_3
32fe55e38921715d1841643832de6126	helicase_c2
32c63a9f156eff649dff4cd38f9a6027	helicase_domain_protein
727db5eb2f1e127d55a8a5241bb22809	histidine_ammonia-lyase
9bdb44530023df72685bf1ee605ebaa2	histidyl-tRNA_synthetase
60c2cfa8313a766b99bfbe781de9b064	homocysteine_S-methyltransferase
e2eff30305b41c5cf4dfcff48369b428	homogentisate_12-dioxygenase
91f56d783f2ce008d1f266f5a1418bea	Homoserine_dehydrogenase
25099089371f7bb186cbb8f8d5139917	homospermidine_synthase
0d35f7ee7f10b4be31025539da1193f1	HpcH-HpaI_aldolase
d3e74603b94bc84e3192f221da0bd277	hybrid_signal_transduction_histidine_kinase_j
07c1bc482c65bd0b7d8f4ead8d627886	hydroxymethylbutenyl_pyrophosphate_reductase
02130426831f254c4f98b6b6dd808188	hypothetical_protein
034a4f7f0187779ee7833de44be08cfa	hypothetical_protein
065095ebcdcece87c62cc8d19fd76939	hypothetical_protein
0c6863bda8c6e5e370bb253245abe1e5	hypothetical_protein
0ee075483841847354ed28da296b9b05	hypothetical_protein
1a43c1ca3a562be0f83fa8f108b50dd3	hypothetical_protein
227e7e8a5434b001073048dfeeba472b	hypothetical_protein
2356119066e94ea0879eb609b6ed31f3	hypothetical_protein
2a6da60088049fb952350feaf195bf10	hypothetical_protein
2f71a0ee27af25959b77df7a33a5aa30	hypothetical_protein
367b45447f411225ef463b7e36f5193d	hypothetical_protein
4221c5c8d11ac6eb3e895dc70d917882	hypothetical_protein
430ae67ae19266ab14c2a43dff9b31d2	hypothetical_protein
43396afa6ab738f9c713c252bf23dd2f	hypothetical_protein
443071ef95355557c3cdf83d49d07e6e	hypothetical_protein
475e38a656ab8c956302bb567fc4164c	hypothetical_protein
48be835810ddebc1529a87ad91f6ccd7	hypothetical_protein
49679941cda27ef839378aa4115f9d40	hypothetical_protein
4a5890a1afd774b9e1edbb62ac0d072b	hypothetical_protein
4b33599dc18912af6c73c576afa215b2	hypothetical_protein
512dc7169308e8d1a91414909fe036fe	hypothetical_protein
538d8d5cb1ab235269d49a750d5bb399	hypothetical_protein
559e003adc4739337a262f7a510c478b	hypothetical_protein
66943ce07e90620a2a6c2530b0faf9df	hypothetical_protein
69f3c95319ca5a1916fc838db0033646	hypothetical_protein
6e00b9168e1a4562330f9bda4ef388e5	hypothetical_protein
774e2604f6535bdcec97f098148f3a46	hypothetical_protein
77a1e0a4debdbc934189860009f5a9f9	hypothetical_protein
79409dcc4380fab17f067c1667e718ad	hypothetical_protein
7c8fcf7618ea633e62394778f4908f11	hypothetical_protein
9076be9e5121dffe907613f71c099e4e	hypothetical_protein
96f97e8691a806d4844903819a540189	hypothetical_protein
99f741af1df72679ab794272725a27d5	hypothetical_protein
aa412d20bb59018087fdf606ee4c6591	hypothetical_protein
b3906088f92937dc4264ac61b2dc894d	hypothetical_protein
bdfe8e314d11d030a989f699fd2cd53c	hypothetical_protein
c89c0a4ed34cc4f0fbc17a225bf41740	hypothetical_protein
dd18a17c7727a541b32a4d21224400a9	hypothetical_protein
e48a4548950bf33cf50a0c049463957b	hypothetical_protein
e5dcb33e1da58ba6c7c1aa05f6413401	hypothetical_protein
f41b2c03207a0e0041a9a23d7b38dd3d	hypothetical_protein
fcae5883f64145b49236a147150253f2	hypothetical_protein
fcf58bcae7fa9f77a8db3c43ce0a0daa	hypothetical_protein
2aae9a355a30d87f4d650d77154fed63	imidazolonepropionase
5edc587f19716c28c1aeb2f9c6815b38	inosine_5-monophosphate_dehydrogenase
d6c6bb3be0c1da288d2d65ab7ab0db54	integral_membrane_protein_MviN
a277c6526b1aebf2f49ccd3e04a58ef0	iron_metal_dependent_repressor_DtxR_family
8562b675b1872a38a937f550a049cd46	iron-sulfur_cluster_binding_protein
838cc2c0f9dfc38814b30f310db3f46f	isochorismate_synthase
eb0bfaa3fdee05cdc2a5d94a94d996db	isocitrate-isopropylmalate_dehydrogenase
92730772ec8df46ab427ba64f40b2b11	isoleucyl-tRNA_synthetase
9f4dae71f890939b4a5f2a0e9e1426c5	isoleucyl-tRNA_synthetase
0bfdaadb582fc0f961796bd92952cf1d	ketol-acid_reductoisomerase
c68e058db9af643d33fc9384d6dbcce6	L-lactate_transport
7b2bee5cdb46c5478e9349b556554b6d	L-lysine_23-aminomutase
016d663ae5d4c3f00ba95f6ab65c6a7b	LAO-AO_transport_system_ATPase
5e206236e7dbb422f21a7502ab020bee	large_ATP-dependent_helicase-related_protein
1f0fd03db610711c737b67285ecf4570	leucyl-tRNA_synthetase
c98be7c76aa814a01defae5e588e6836	leucyl-tRNA_synthetase
d7939e1b389a71b79d77e2b57ba51299	leucyl-tRNA_synthetase
e387de13afea9bb054cbeb593e9028e2	leucyl-tRNA_synthetase
15be50550145bb7c94a12c82dfa6fefd	lipoic_acid_synthetase
216f96074216f78a04673272cb99e6d4	lipoic_acid_synthetase
2cd987f906e7546642f28d2dd2add766	Lon-A_peptidase
d707a3b688eab40d7fa8394b942a53b5	LuxR_family_transcriptional_regulator_fused_with_ATPase_domain
361a7188065d91acfe9d7688a1748268	LVIVD_repeat-containing_protein
78be466a3abf40bdc889f7b0b4f9889f	Lytic_transglycosylase_catalytic
8f46c2a7f5d30b7278528a2f25581a0a	malonyl-CoA_synthase
25373a9a21394b63ec10e297814b2672	mannitol-binding_protein
5901776f7d391b955bd0c4c1c08ccdc0	MATE_efflux_family_protein
cdbc6ddb203f6a7be17d42ec673d40c6	MatE_family_protein
34d212a6d3235ebede538883cfac7df9	membrane-bound_proton-translocating_pyrophosphatase
7b359d2d3c38563395a28b2b46adf693	membrane-bound_proton-translocating_pyrophosphatase
a3d97442964ae409fd6323f483f6760d	membrane-bound_proton-translocating_pyrophosphatase
de49ecab87f1948d2ecf3e6723881abd	metal_dependent_phosphohydrolase
45e8256f779cc529b46ba7a64f10c5e2	metapyrocatechase
23bdddacc50293c2504265ea4a3b2e20	methionine_aminopeptidase_type_I
c6e7dac453b9cad616d11ebdba131c37	methylmalonyl-CoA_mutase_large_subunit
e8e7020e0c40a86662e01c6115834772	Mg2_transporter_protein_CorA_family_protein
2e5c5a8fff730bf7af135a247cac0ac1	molecular_chaperone_DnaK
03649ae3f7a7c71d88de1e7a42ed8219	molydopterin_dinucleotide-binding_region
b88c6fb693db8a44eb810ec495e171ab	molydopterin_dinucleotide-binding_region
578601ed56872958d5f4e5383f38b182	monooxygenase_FAD-binding_protein
9cd086fbeb0006908d4d0b1f702a089a	MotA-TolQ-ExbB_proton_channel
3a8caf884d3a18d2da1b6c9c77e29074	multidrug_resistance_protein
7a6f2fef446c63339bef40618cc3cd69	Myo-inositol-1-phosphate_synthase
e0c01f4718408f0ebbb434dffd6646ac	myo-inositol-1-phosphate_synthase
a1f7129894ba0271afb96666b7ac8de0	NAD-dependent_epimerase-dehydratase
205647a1ddc628828dd0dd19eb7e4883	NAD-glutamate_dehydrogenase
1a385c2254a661fed6c1a307d0fb0931	NADH_dehydrogenase_I_D_subunit
ba1601c1a395e938a3f182ed06b72978	NADH_dehydrogenase_subunit_I
7a649498c74a003802129221aabf45fe	NADH-quinone_oxidoreductase_B_subunit
8c3d2ec8fb879e17828b27d55a9c0f7c	NADH-quinone_oxidoreductase_chain_F
e7537e6331be719dacc4f874b9ec522f	NADH-quinone_oxidoreductase_chain_G
8d945eb6707ce98bd2b6e1400f0b3fd4	NADH-quinone_oxidoreductase_chain_I
ed16e4afae69b1743666e84b4883e519	NADH-quinone_oxidoreductase_subunit_F
47d328319d8bf7b9a82ed754b755d75d	NADP_transhydrogenase_subunit_beta
35733a3bdf16c027979bca7e1b8c3e8c	NADPH_dehydrogenase
d79e22df8266e0d2169296e0a211d465	NHL_repeat-containing_protein
f3bf08b3385d8be2fd5f10a46e9b3b38	Nitrilase-cyanide_hydratase_and_apolipoprotein_N-acyltransferase
453470f05f7fbf98b70e1717955334c9	nucleotide_sugar_dehydrogenase
6311bdb83df04b8898d637e9350049b5	nucleotide_sugar_dehydrogenase
0997ae0b3689cc714b7164d510a54ab0	NusA_antitermination_factor
8562a860e4ad50bd211b20d5687f51d0	NusG_antitermination_factor
7b9b83d145aed9601dd069f219904a9e	oligopeptide_ABC_transporter_periplasmic_oligopeptide-binding_protein
30008aa1893ac7e883db1eb1d3286081	OPT_family_oligopeptide_transporter
1b45415264776eb4a7dae61258ce2084	outer_membrane_protein_assembly_complex_YaeT_protein
4cf235f4dbe2fc4b1ffa0d5a197c1fce	oxidoreductase_domain_protein
3f1b33f82f723a4b07912f666cc41884	peptidase_M16_domain_protein
f9999cf72175aa5f88c36f7b62cee7c1	peptidase_M16_domain-containing_protein
98aa571715e4d3ac18fdb479b7726e1b	peptidase_M20A_family_protein
422930f5ddab231ce43b8758f8c97395	peptidase_M24
f7f4e4ffeec8e1721a2d51fa9837ac43	peptidase_M24
01e74723e128cf47ac225f0cc3342ebe	peptidase_S41
1262ca26c6641b8cf35643b8ac73ce46	peptidase_U62_modulator_of_DNA_gyrase
f3926e0f5d9a46b59ef3e64cd2ef4c5c	peptide_chain_release_factor_2
a5de28cd7f15c5076a43b52e61b8a7ca	peptide_synthetase
2569faea5d9f15d87280d1dd31bb8669	peptidyl-dipeptidase_Dcp
6e4438e616b05c3dfb89c79718f1379c	peptidyl-dipeptidase_Dcp
38e5454b187519bf2a91bb817defac12	periplasmic_substrate-binding_component_of_ABC-type_xylose_transport_system
4aff3949dc3a76c5931e60fae66b16e3	PfkB_domain_protein
0479a2662cd1ccc5c6a1e7e76f3eb9f8	phenylacetate-CoA_oxygenase_PaaG_subunit
ea26dfb98f6ee0a5051c10d1199c0f52	phenylacetate-CoA_oxygenase-reductase_subunit_PaaK
a0a13ccddb5e0f841e1be1c95ceb4813	phenylalanyl-tRNA_synthetase_alpha_subunit
406aaf133226479a7ce7210e59cfe6b6	phenylalanyl-tRNA_synthetase_subunit_alpha
105bfd59473007fbd3d09ef522abd972	PhoH_family_protein
d196687d424cb7bc3948ed7146019cd0	phosphate_transporter
28deaf7285cbe46177443f72de668ad5	phospho-2-dehydro-3-deoxyheptonate_aldolase
c440093b277be6baf1778740950cb66c	phospho-N-acetylmuramoyl-pentapeptide-_transferase
0ce792e77ff2ba0ffe62b7e1f921d718	Phosphomannomutase
eb9b972e4e8fa4114169e97cc1b44637	phosphoribosylformimino-5-aminoimidazole_carboxamide_ribotide_isomerase
5a82a2cc619632cea79e65284389c767	PHP_domain_protein
e6e95c9e27a9d09396dfeb31afa5cc21	PilT_protein-like
796c227aeb26e4e70eb47a46b7ee3530	polyribonucleotide_nucleotidyltransferase
8bc1264a7c036f97723a63113c2ede94	polysulphide_reductase_NrfD
0bb21c48dba9d7fcc40876ca1b8822d0	pppGpp_synthetase_I_GTP_pyrophosphokinase_SpoT-RelA
2c3378c69a42f524c713f90d61b57ae9	pppGpp_synthetase_I_SpoT-RelA
605b2e615789ed5ef4dbf4032be5f42d	precorrin-3B_C17-methyltransferase
4a89a43c085b7764537cc76f7981f0b0	preprotein_translocase_SecA_subunit
6e2934ab9f8e73bc658ddaae509d5c15	preprotein_translocase_SecA_subunit
ebd2c549fb1bfcf3a74242d443721939	preprotein_translocase_SecA_subunit
24dacc0f8bf79b81dfd904ac356fad8a	preprotein_translocase_SecY_subunit
f1a35ecdff418f6e136eb20578aad201	preprotein_translocase_secY_subunit
7b5dea5baeee8024754039da9b2dd600	preprotein_translocase_subunit_SecA
81d9a5191eee1cee4a07ec377621f797	prkA_protein
9ef1f09eb9d9aa9ebb16f334bbc9f3d7	prolyl_oligopeptidase_family_protein
34eb64ceaf46c8bff6edeee6d5b179a1	propionyl-coenzyme_A_carboxylase_alpha_polypeptide
44c4be96470922ffcf9f08f3ed721254	protein_kinase
65aa1fe640ce4b0ddf63502ca1e67b1a	protein_of_unknown_function_DUF140
e7b07547d3fc9bf65022c5d4cb74bae5	protein_of_unknown_function_DUF198
7d65f63507f65dfab763f55b226d1f6d	Protein_of_unknown_function_DUF1998
6d5ed30b4dce30acfa7c4d154bc1e116	Protein_of_unknown_function_DUF2344
ff8d40f4157f641314fc7c07a2bcfe83	protein_of_unknown_function_DUF255
3d0152c1e7483d5df068fd49b5c02b00	protein_of_unknown_function_DUF323
75bc052e463f09a843cec698fc1f920f	protein_of_unknown_function_DUF437
102e1edae916f1d1fce0ba51b8b25050	protein-export_membrane_protein_SecD
c0ebc320bf172c39688ae383cf012be3	protoheme_IX_farnesyltransferase
ff4c6e6b44e0292be2131eb84b8c6f73	proton-translocating_NADH-quinone_oxidoreductase_chain_L
035bca5ae9fdcdf390439d466ccdf0ac	PSP1_domain-containing_protein
a32948c28205a4f15cf7444e91c70bfe	putative_ABC_transporter_ATP-binding_protein
476503a047d0f1fd515b5d6e67530d6e	putative_ABC_transporter_ATP-binding-permease_protein
6fed1841d4888aafbf1cd65b9ba30f30	putative_acyl-CoA_carboxylase_beta_subunit
07e3a8c88fc084b2c1752f387ef6bdb6	putative_acyl-CoA_dehydrogenase
a39ffdf598ab20c3ce0f5ca10f1474a0	putative_aldehyde_dehydrogenase_protein
088a70eacc6eb04ee1c2b48df907aa33	putative_asparaginase
85a39970cb257eae0d2c94de218a3e6c	putative_bifunctional_allantoicase-OHCU_decarboxylase
132e2eaea37ae06b752e27987e96f06f	putative_branched_chain_amino_acid_ABC_transporter_permease_component
44b32d1a6c7f5983dc94e774903d680d	putative_branched-chain_amino_acid_ABC_transporter_binding_component
a6a4f667594b8349b7aba067def10a53	putative_dehydrogenase
408cc7b49e9585f0ab24cb51a97523e1	putative_FAD-binding_dehydrogenase
4f25488296b758461a54628a6fce1164	putative_glutamate_synthase_small_subunit
5cdc108695491ead3b48f4a39e80be0c	putative_hydrolase
678184fbe2413b0d0e0e9d12ca3dcf33	putative_iron-sulfur_cluster_assembly_protein_SufB
a567edd58b6bb533962019d3a451a939	putative_iron-sulfur_protein_transmembrane_protein
0c258dfce92dbf8c02e576a4b8f594b2	putative_isomerase
894e77b06573f566c2f582a6b5a58bf6	putative_mandelate_racemase-muconate_lactonizing_family_protein
1679700248ef241c4a64f0eff5f5b852	putative_metallo-hydrolase-oxidoreductase_superfamily_protein
0b508e22f46daafa9ce399272676c647	putative_monooxygenase
8016e62f7065ebf64b07783cf0e632eb	putative_MraZ_protein
476d34393946d1815647ab8a6ad57e23	putative_NtrC_family_two-component_response_regulator
0e2cf6b0d2cf11298fd9eec04a47f7c0	putative_oxalyl-CoA_decarboxylase
8f5cc024e0b2048993e29609e7ccecdb	putative_oxalyl-CoA_decarboxylase
e6cc5efa9bfd53aabaf69fe46346377c	putative_RNA_polymerase_sigma-24_subunit_ECF_subfamily
64cd930ccb222162b92847f260e722a1	putative_RND_efflux_system_multidrug_resistance_protein
1ff5ff651d342d9d911e88fdbffb18b1	putative_sensor_histidine_kinase
92b1798463b6948004780f7353e855e0	putative_sodium-solute_symporter
cdd78de2e0c38a96e79a2711a9b01516	putative_transcriptional_acitvator_Baf_family
0a5a4d6034f60f94435d80dff726f1bd	putative_transcriptional_regulator_AsnC_family
a51b8d04d2b594dbb78d1d4218693e51	putative_transcriptional_regulator_GntR_family
90eb2ddc4b1fdf9e1c9257dd6277f9cb	putative_xanthine_dehydrogenase
8a354281249f2b9dab28d2ccc426f6ac	pyridoxal-phosphate_dependent_TrpB-like_enzyme
a6517782a851ea0eb8ba05c73d71ef3c	pyruvate_dehydrogenase_E1_component_beta_subunit
107c5863893a0b7897c01a9a32acdcbb	pyruvate_dehydrogenase_subunit_E1
a0e0ceb78244381bcf5eda8be4407403	pyruvate_dehydrogenase_subunit_E1
0b1bf446c9a0ecdf2991e5fb8fc25806	pyruvate_flavodoxin-ferredoxin_oxidoreductase_domain_protein
8972f8475f71a19f1093554fc485fe5f	pyruvate_kinase
f75bf9c8adb62897269fdbf0ca0d7d24	pyruvate_phosphate_dikinase
26750f6b333bb6f1223a4fabc6c947e8	quinoprotein_glucose_dehydrogenase
4ca5f6035c54e293642ee5b7a53a658a	quinoprotein_glucose_dehydrogenase
bc7661284afe8282bc3352769fa84de1	radical_SAM_domain_protein
723f3b96aef19bd0f397ee6bcea9619b	radical_SAM_domain-containing_protein
cb8d97473391ecfd6cc99e076edf33d0	radical_SAM_domain-containing_protein
9600b78d6cfdce84f7b691aaafb222a2	recA_protein
10a776c829e3a41e9d833ca217948f7c	related_to_UbiD-type_de_carboxylyase
02c449b0e6ac33e72139110841b854c9	replicative_DNA_helicase
e430ce3fa6f493cafb141d56f4b48461	response_regulator_receiver_modulated_CheB_methylesterase
e49514db9a575a4b4ce495ab97ca8af3	rfaE_bifunctional_protein
20af238cb3dae68b6caeea8a416e764a	ribonuclease_PH
088c3adc1cbf57c1951c7b1858827454	ribonuclease_Rne-Rng_family
6794aed2b7887799fb6ff6389b5f0022	ribonuclease_Rne-Rng_family
5362d99cf8aec4daab3b764c3cea1c30	ribonucleoside-diphosphate_reductase_adenosylcobalamin-dependent
672e10730346ddde767a5ffc04e4e79a	ribonucleoside-diphosphate_reductase_adenosylcobalamin-dependent
41d93a5b4c94ae4d7d4bc0182183347d	ribonucleotide-diphosphate_reductase_subunit_alpha
db686f0c160f3ee14e5312230b4e7524	ribonucleotide-diphosphate_reductase_subunit_alpha
1e1bdfbcb94562973456d2bcfaad8818	ribose-phosphate_pyrophosphokinase
c67bc8ab4f7d4ff2b42b64eaf2d583cd	ribosomal_protein_L13
bf364a350e73a7838496fe70e8654c9d	ribosomal_protein_L14
949f050599077d59b03a93ff1b16292d	ribosomal_protein_L2
aa2d9e139124de7c2d0e9299141be61e	ribosomal_protein_L6
39e354a3175ebd788aa2bdd2524d5816	ribosomal_protein_S5
00d130d6e2106f1cf48750797d348e0c	ribosomal_protein_S7
a5462f7a01c2110603d8d2c9f7949e57	Rieske_2Fe-2S_region
ff9d10262de6a69d30cd0414fba0e4af	ring-opening_amidohydrolase
182b2601c4f432d6066c64741e331335	RNA_polymerase_sigma_70_subunit_RpoD_subfamily
a5125e8d41e677724a56e07f80bed08c	RNA_polymerase_sigma_70_subunit_RpoD_subfamily
cecc9f5ef1e28b70df4fe25aaac7d982	RNA_polymerase_sigma_70_subunit_RpoD_subfamily
cfbdf968e9789a2811a5d5eb12d23c12	RNA_polymerase_sigma_factor
03809ec94ee1b985b57d2a94cbfb9057	RNA_polymerase_sigma_factor_WhiG
cb7e38e3e1ed09c1640751dac372a121	RND_family_efflux_transporter
6068033e6f2a6b609d5727175fb365dc	rod_shape-determining_protein_MreB
8319b223ca6156f0f9382559b16de70d	rod_shape-determining_protein_MreB
a5f7cdea00866b00510eba3abfba01fe	RpiR_family_transcriptional_regulator
99cd05e3b97b075c9ee06c30c868b499	S-adenosylmethionine_synthetase
3ae6049013d0a7f45d0f46fed6533c34	sensor_histidine_kinase-response_regulator
dacee992362f52fd7fe1cb4bdd2fcc95	sensor_histidine_kinase-response_regulator
5e3311be9bace3cac1ae5371115da3b8	sensor_protein
55bfff75f92b2bb6970a04f3c7e1f41a	seryl-tRNA_synthetase
9bf64823a771764631d7e32a43d888b5	short-chain_dehydrogenase-reductase_SDR
b47d62da6ce1cc5fc73d0ddff402b75e	short-chain_dehydrogenase-reductase_SDR
46067cf2a5bc00ac04c53dbce8988f0d	signal_peptide
19e5e6d9aefb6611a4eb7a9e4bbad8d3	signal_recognition_particle_protein
cfaf6c460fc42c0c907981857ed25eea	signal_transduction_histidine_kinase_with_CheB_and_CheR_activity
db4274d7d16f830dbe587fa38bf0d562	small_GTP-binding_protein
07bf090eb83e60b9b63cd5f52329a9f8	SpoVR_family_protein
1c9d4bb63c1b72acad086c887b402105	Stearoyl-CoA_9-desaturase
e293068d6aa8487b44e25137ef3124d8	succinate_dehydrogenase_and_fumarate_reductase_iron-sulfur_protein
32992c7dfae52ca6d60ec1f1cf6ef441	succinate_dehydrogenase_or_fumarate_reductase_flavoprotein_subunit
44675f18f1ba4bd6b875cdf6bb5fd1c9	succinate_dehydrogenase_or_fumarate_reductase_flavoprotein_subunit
5dc3cd573e39d71f8fa479690e3c8991	Succinate--CoA_ligase_ADP-forming
53a6c57f5910763425a09ff21b4dd485	succinate-semialdehyde_dehydrogenase_NADP
78130a6981d12b3571e49d613c00314f	succinyl-CoA_synthetase_alpha_subunit
cf87721d8dbd741dbdf2aeb6dead64e4	succinyl-CoA_synthetase_beta_subunit
2d2d71aed0c82034a9efbf062f659b1a	succinyl-diaminopimelate_desuccinylase
c075bb3cea0a4d6b8fa8530bd754b0df	sulfate_adenylyltransferase_small_subunit
7022604a48d5459cc874d845d6ed537d	tetracycline_resistance_protein
07b41427c8272d9b28c9391327fcc24b	thiamine_pyrophosphate_enzyme_domain_protein_TPP-binding
36c95a19aabd69c8e10dcb5665daa65a	thiamine_pyrophosphate_protein_TPP_binding_domain_protein
9e50596612b03b36bb3dbc80febc5c8a	thiamine_pyrophosphate_protein_TPP_binding_domain_protein
c8ca8f046c4938ea92091e5794f01714	thiazole_biosynthesis_family_protein
2c3eee2d34a601e556b333cc0f3bac27	threonine_dehydratase
0612da56ac9731ebfffb7174e8532c6d	threonine_dehydrogenase_and_related_Zn-dependent_dehydrogenase
832909fad482ba780960332ac93809af	threonyl-tRNA_synthetase
c05e6c9b3173498910540c8e3a39f91b	thymidylate_kinase
00b36fa68c70e1e51b74baa787032abe	thymidylate_synthase_complementing_protein_ThyX
1292d12d3f51d63d3d3207e9ebc8b2eb	Trans-hexaprenyltranstransferase
9bab2baa6e86f20c47622bbce318be20	transcription_elongation_factor_NusA
02375bde471e7da875f81e3493a2c2df	transcription-repair_coupling_factor
1bf81d32a53b00f66f3066d6d2583f0d	transcription-repair_coupling_factor
4303106cb82ed92e46e571435b2e6e75	transcription-repair_coupling_factor
9d1dee73c8ca56c0b218a3ddf64d5536	transcriptional_regulator_protein-like_protein
f9c3d5a1183fd5f5c2008dcc62a7f03a	transketolase
7627a699c9576ae01549f9660e27f2a4	transketolase_central_region
c9d35a3773f35e9a52f79419266956a9	Transketolase_central_region
4523e305cf38092e613c5eb5b3d5ae2f	translation_elongation_factor_2_EF-2-EF-G
5db73bfb86e392d7ee0fa34e89da9e8f	translation_elongation_factor_G
815ebf707633fb48fdbe5552bcfbd368	translation_elongation_factor_G
8503a00579bccad7e5dd8374ecd94cd2	translation_elongation_factor_G
f8e040393cdc71eecd50e1b0bca9160c	translation_elongation_factor_G
50dfee03d4a09e9119c1997c158ed379	translation_elongation_factor_P
1bdb04bac1c794746443bb1b7148b48c	translation_elongation_factor_Tu
1ccf844d3265c17d49a00c544d2f1112	translation_initiation_factor_IF-2
c0eef372d20b6156b9ef3836de7d6d86	translation_initiation_factor_IF-2
0ae870e44d65a926fd854796cd440cb5	translation_initiation_factor_IF-3
53da134c08acc27aec4bf1b051be211d	transmembrane_domain-containing_protein
553e05072c20e8412f8afa4f01086367	twitching_motility_protein
5684a0f0de678525f38f527014ba9c6e	two_component_sigma54-specific_Fis_family_transcriptional_regulator
203ea67f10615f80ab56077d061f6e2c	two_component_transcriptional_regulator_LuxR_family
e9ab8f6908653b6e60f812a77b3d67b3	two_component_transcriptional_regulator_LuxR_family
a1177d49e73754c5c4a2255f0d5c0216	two-component_hybrid_sensor_and_regulator
17f7719c3fef55dc374cfe4e167e06e0	two-component_system_response_regulator_receiver
7280fb427a8ae27001c11eaa0203fb8d	two-component_system_sensor_kinase
ebac7dfa418517555033fc969f95ed26	Type_I_modular_polyketide_synthase
71cb1da4bfd9976d55ba450591126fff	type_ii_DNA_topoisomerase_a_subunit
5c5ca5bdbe9011a437065e896bda23cb	type_II_DNA_topoisomerase_subunit_B
4b0bcd9b46568ab60336387a2373689b	type_II_secretion_system_protein_E
8042aae914d8d5d5c8ba3df0951b8dc6	type_II_secretion_system_protein_E
a07125d1f9bf45f7512a6043ada787a0	type_III_restriction_protein_res_subunit
0899d5ecfece7a6814a11a04a180e897	type_IV_pilus_assembly_protein_PilC
2e0c79379f515bd85e22be662d085600	UBA-THIF-type_NAD-FAD_binding_protein
a612192fbd2cffc058e49fe3d1828739	Undecaprenyl-phosphate_galactose_phosphotransferase
246aa0921aacb2ff60ac58d13a760ae0	urocanate_hydratase
87e5f70fac8195b12c1c7d8f29bcdaf7	Uroporphyrinogen_III_synthase_HEM4
5f6ebf82f5921838e1ca5c9ab297b7b8	UspA_domain_protein
27fb9fc54cdbcce6fd5108e8a042476a	UvrABC_system_protein_A
97613dd3275ef3da36c3417bef201a82	UvrABC_system_protein_A
849a117f36e933ce55b590301d59b7f0	UvrD-REP_helicase
cb44b1c2a62917d54ac7ec5637bc4df5	UvrD-REP_helicase
bc5bff0c37cca936a1cba6c7a4c91f11	V-type_H-translocating_pyrophosphatase
a3e89e4db9f5081fd5a7798cb6c4611c	valyl-tRNA_synthetase
59f9dd2b8c897b476397d704e9e2d3e6	von_Willebrand_factor_type_A
7a4ef9dc3cb5c7b5efee397aecfea1cf	VWA_containing_CoxE_family_protein
b09bbed7fc73f87b96d0c46b96a6eefa	xanthine_dehydrogenase_family_protein_large_subunit
cef3dd3eb2e72daf5371ccb7c1521f36	xanthine_dehydrogenase_subunit_D
d16341de9b6601f2316ab7289ce494cb	Xylose_isomerase_domain_protein_TIM_barrel

## Sheet: Ruderals_Core
M5NRid	Annotation
d308a35fae42ce86baa03edc6c213a56	14-dihydroxy-2-naphthoateoctaprenyltransferase
6b107be82c56ea846d8b679f80b98e1c	2-amino-3-ketobutyrate_coenzyme_A_ligase
dc35ef46c22964c0723c7160c01af09f	2-hydroxyacid_dehydrogenase
a3cfac320048762e39182ba791a491f8	2-nitropropane_dioxygenase_NPD
bca4b0f2fe7ecef666f1287ba161ead4	2-oxo_acid_dehydrogenase_E1_component_alpha-beta_subunit
8dc7eccdb87442e372cc0dcff12ed4f6	2-oxoglutarate_dehydrogenase_E1_component
af16095940f5429b1c0b8af1fc33d8e1	2-oxoglutarate_dehydrogenase_E1_component
f3d6362733f0ae0fd4b19ce51218a6e5	2-oxoglutarate_dehydrogenase_E1_component
c999eb4be039d683a7102d8637e11aac	2-oxoglutarate_ferredoxin_oxidoreductase_subunit_beta
68d6bfc45cad3f4d1d06ff52104e755c	2OG-FeII_oxygenase
49654362e9dbd6e2f6acbf82830c144a	3-hydroxybutyryl-CoA_dehydrogenase
4b8af4397883a360c272b4e6115b77ac	3-hydroxybutyryl-CoA_dehydrogenase
aceef2864400f160995549b0f2b6a3fe	3-isopropylmalate_dehydrogenase
09f575962fb76d0c41b62679e87719ff	30S_ribosomal_protein_S1
83e1454dea5130184a5b5b30d2bd54ff	30S_ribosomal_protein_S13
631802b89a7aec8a5c210dc39ea0d9af	5-methyltetrahydropteroyltriglutamate--_homocysteine_methyltransferase
f9b5430194b78254c2a22fb8e88c5945	5-nucleotidase_domain-containing_protein
189e47a0456e26f1ae38fa0bead5fa25	5-oxoprolinase_ATP-hydrolyzing
631fa016f040c52796f6d5dc017132a3	5-oxoprolinase_ATP-hydrolyzing
9455273bb32fe4d9d3a56682cf81755f	5-oxoprolinase_ATP-hydrolyzing
665f28586387d056c8dff72a9ecf0b23	50S_ribosomal_protein_L13
cb71dd95f8eb3941ba2a9aadcd3829c4	ABC_transporter_amino_acid-binding_protein
c72bfe6eb05ba40ea0a9cce18de360ad	ABC_transporter_amino-acid-binding_protein
00ecbd520c178b1965fab3ba7a4edf39	ABC_transporter_ATP-binding_protein
9a2324fb30d825da4fb802e3df09a1ca	ABC_transporter_ATP-binding_protein
c4a6a5005f33352d908b2624cc9962c3	ABC_transporter_ATP-binding_protein
c8cdda27495b18c1ca18a46e0716b21c	ABC_transporter_ATP-binding_protein
01f30e48e4804b8bd1294798c3b08c13	ABC_transporter_binding_protein
2b29d94c7a187bfb2ce3c1f4a29fbce4	ABC_transporter_molybdenum-binding_protein
67c4bdcea1a378427fe023af2aa6155f	ABC_transporter_peptide-binding_protein
0e6c16dd9b4078c77366f66b7a74f83b	ABC_transporter_permease
ffcfa8d9d8bfdb58a6e15dcd896e5f5d	ABC_transporter_permease
104213c551c3a6f2aced22ff8b9980ae	ABC_transporter_permease_protein
be1c659d78213633b2fcd39398aea8b5	ABC_transporter_permease_protein
4b13d8633c4ff279d9484ac0561c9772	ABC_transporter_related
9761d05d09099438b4e6f673f4ea2294	ABC_transporter_related
c0b010fd5408c01678b44fb3aa72a4dc	ABC_transporter_related
8654a94705c1e4c34bf6c49062dec4e1	ABC_transporter_related_protein
8c5d91c2b76d46eab9333ea0e620ebdb	ABC_transporter_related_protein
03197064c376bf6641c0bd92775a8cf0	ABC_transporter_substrate-binding_protein
044bc17777cdde64bb34147008de1d0c	ABC_transporter_substrate-binding_protein
14e2aa81fcecf7f7cc6184b0b979b3bb	ABC_transporter_substrate-binding_protein
49621a3f482ca438b70e1e4d15b7357f	ABC_transporter_substrate-binding_protein
65b8d1fee58b29892f711c6975dbc5c4	ABC_transporter_substrate-binding_protein
b31e172aa588d79aefa6f1ed83fffba3	ABC_transporter_substrate-binding_protein
4ea7ef25c4c8ac08e4d1276e402abc0f	ABC_transporter-like_protein
fbe4d9b610da6d7918c7a65960242607	ABC_transporter-related_protein
56c9b0b54dbf4e1b3b1a5750c6210ad2	acetoacetyl-CoA_synthetase
19319444c1faa2b0579b33c3e73c83e2	acetolactate_synthase_large_subunit_biosynthetic_type
a4fb77e3bc715f4b6b8e28fd532b5343	acetolactate_synthase_large_subunit_biosynthetic_type
b9a94fe8656fed3b96283c01f56edcaf	acetyl-CoA_acetyltransferase
223757bb0cdee0bf2c17d0090e001d52	acetyl-CoA_carboxylase_biotin_carboxylase
3a7a45ef5650fdf0b941d67ab36315bb	acetyl-coenzyme_A_synthetase
667c6d399f8358269ab6ba99e754c1f9	acetyl-coenzyme_A_synthetase
c87cb4fcfa101580135aa559f6e13f5a	Acr_family_transporter
c6d5ed264276589cfc575128a47dc073	AcrB-AcrD-AcrF_family_protein
0c8633d73e79387bd1e54050b6860041	acyl-CoA_dehydrogenase
22d48b26fc78bc638f27767ca16ac26f	acyl-CoA_dehydrogenase
3c9f36143d27cd6088ed01f853357dee	acyl-CoA_dehydrogenase
4ac512dc3ae94184b9d749f9a035d171	acyl-CoA_dehydrogenase_domain_protein
4ce0f441beac7fa26356c77758479cb4	acyl-CoA_dehydrogenase_domain_protein
e4b9100e42d6ebeb55b33f23e9d067ca	acyl-CoA_dehydrogenase_domain_protein
f155b3305288b647699ad700fef02d92	acyl-CoA_dehydrogenase_domain_protein
023a37478b2d04c72ec68c64fe3a8394	acyl-CoA_dehydrogenase_domain-containing_protein
4c867dbc98951383e55de7501c715d58	acyl-CoA_oxidase_domain-containing_protein
3cc41474d51eac87d95a72555953571b	acylglycerophosphoethanolamine_acyltransferase
368332b385ec5d4683a8aa7d9a577c7b	adenylosuccinate_lyase
49915b099f1d06b448fd2d1b79859251	adenylosuccinate_lyase
ce069915e37c31e35fb81d2127c0989e	agmatinase
4a67d564a1820867693047f02ae4e554	alanyl-tRNA_synthetase
b43eb84f218455e1a2cb9ab784eb1ed1	alanyl-tRNA_synthetase
2981d9913a10d247a792f35002bb2566	alcohol_dehydrogenase
ffb688deb49156e70ce59454d16d50a6	alcohol_dehydrogenase
6f74bd595c5173c0cb6edf62f5c9b678	Alcohol_dehydrogenase_GroES_domain_protein
2c078f8416f6e44fa9e774ead5714667	alcohol_dehydrogenase_GroES_domain-containing_protein
8e11079d1c243ffa0036ef1092fc1d0a	aldehyde_dehydrogenase
5e2d78e6ec3bcfe5a8da584e18370b03	aldehyde_oxidase-xanthine_dehydrogenase_protein
d1f9540ec59fddc83ea2ed70a3e012a5	aldo-keto_reductase
9a7530559e18bfdae4ef34da93253ba3	alpha-beta_fold_family_hydrolase-like_protein
cbb11fa9d0ed0bf611ae712a1e284066	alpha-beta_hydrolase_fold
d0fa520c6b8a1f5688b77246c6b2e6be	alpha-beta_hydrolase_fold_protein
742f7b782ca82747bbf9895d4639c5ab	Alpha-L-arabinofuranosidase
d28cb3760efc4f92e9eeb4b3848027df	Alphaalpha-trehalose-phosphate_synthase_UDP-_forming
404a699625ff29e1fee0025faafcaab3	amidohydrolase
bf27803a78aa2101a821cf95039355da	amidohydrolase
dcb0bfd9b33e2f380bd12cc534f71c28	amidohydrolase_2
0c8b82cd5b595563f3e6ee760bfad5de	amidophosphoribosyltransferase
6e59605022fbabc8042abd98b711bc78	amine_oxidase
f1709ccc067a592e4678c5f6bd44823d	amine_oxidase
ddadf8ada48b824304949139b24e8c28	amino_acid_adenylation_domain-containing_protein
7b1053bc009e1e0d6099cf2214358314	aminoacyl-tRNA_synthetase_class_Ia
17b08e4d511aba479b69bec1f1a58db1	Aminobutyraldehyde_dehydrogenase
6c3ab0f32f4bc078785d9ac664ab9946	aminoglycoside_phosphotransferase
2163845f38cb97217f15d6e4203022cf	aminopeptidase_N
3d5dc3ae0a6d4575da58053588e95689	aminotransferase
a5968c18535e8e35fea98ccdcb861045	ammonium_transporter
0fd463fe69421741c992e7cbe35979e7	AMP-dependent_synthetase_and_ligase
14337cbf524db37dbb6e6a7ed4381f83	AMP-dependent_synthetase_and_ligase
44f9060c01daf0f05e09b30a6b7532ee	AMP-dependent_synthetase_and_ligase
667dae2c5610d6420f67c41d4db88511	AMP-dependent_synthetase_and_ligase
8ee193de6e16b19087d2dd0f5c4d8af1	AMP-dependent_synthetase_and_ligase
fc4f860a0788c399c10b3601021f04b1	AMP-dependent_synthetase_and_ligase
d9822510038686e65077171bc1585fc3	anti-sigma-factor_antagonist
1d17b88b59e8f1dff3c52db445f831da	arginase-agmatinase-formiminoglutamase
25081033103c101474e980bc0c92f8e9	argininosuccinate_lyase
ab23b46a53f6e950174ec4d8edd6f8c8	argininosuccinate_lyase
0f87aed0156d60e5b0fa7cef43c7e827	argininosuccinate_synthase
70c90e2e18486e58aa652a7cacd1da43	argininosuccinate_synthase
03caa477219081cf61f55771c1d99ffd	aspartate_kinase
5e343361fe30073067b4e40ae56872c4	aspartate-semialdehyde_dehydrogenase
c84563c02d2f2472d9e7da4c36f40f30	aspartyl-glutamyl-tRNA_amidotransferase_subunit_B
01c7c77214a42a6e00d6835d2cc7d45b	aspartyl-tRNA_synthetase
0c367515a8697bd248b4bb4b697230a9	aspartyl-tRNA_synthetase
51d7e62e383df81e77202c4f0d2e1251	aspartyl-tRNA_synthetase
dcbd10a4a4db9f2b6fcb004c017d059f	ASPIC-UnbV_domain_protein
856f8b777d01831fbf3b770f73b631a7	ATP_synthase_F1_alpha_subunit
4861dc102970ec16fe91d7ebbd5bef62	ATP_synthase_F1_epsilon_subunit
a3555bb6bf088e772e8b07744b5fdda2	ATP_synthase_F1_subunit_alpha
33a09381347f1416bf58bbf774fced3d	ATP-binding_protein
ad2f13662732a5a294f0f44c93878955	ATP-dependent_chaperone_ClpB
dd109188f25fc7b3cd8db3e86dffba7b	ATP-dependent_chaperone_ClpB
8c5b4f769fd4fcd2485142349cd37406	ATP-dependent_DNA_helicase_RecG
b2efd9921d01745bb328da2042ee5d4d	ATP-dependent_DNA_helicase_RecQ_family
7d7cbc7cf7e1c6be9ee9b8110bd72fa9	ATP-dependent_DNA_ligase
3c54ee52901f99ad0b54b990850ead32	ATP-dependent_helicase_HrpA
e768aac06a189d40f3c48d02daa6ae0f	ATP-dependent_Lon_protease
0f6b3ce12f3908d5d8aacb38773fbf44	ATP-dependent_metalloprotease_FtsH
3e42b11c1853c5eb7ee982d84380d2c8	ATP-dependent_metalloprotease_FtsH
9b4246cf6ae9722e12ba955adb3c03d9	ATP-dependent_metalloprotease_FtsH
1579ee3a71633b13d306941c75ac79fa	ATP-dependent_protease_La
8151b3377b22b8686099ee43f2e607de	ATP-dependent_protease_La
9d072848ba2f2fbbf3a6ceb5b93471b7	ATP-dependent_protease_La
4b1f3722b12536dd4d10ecd1c87a5487	ATP-dependent_specificity_subunit_of_clpA-clpP_serine_protease
5319b61fa0af184156aeb17a36055d0e	ATPase_associated_with_various_cellular_activities_AAA_3
14ae1ac6957ff3ade7a2fee42a678a32	ATPase-like_ParA-MinD
34da65577b6537aa821e5277759933ed	B12-dependent_methionine_synthase
64ece85fdae7b09b7e3ce22f3d1a4e28	band_7_protein
4fab29eda371d20a0627ec8c19147e4c	benzoylformate_decarboxylase
a8ff8bbede5867d50b910cbdcc19355f	benzoylformate_decarboxylase
b524a7fcd4cc7d1b8d2e0ee232a49c84	beta-glucosidase
7e0e1ddf58b7f4c4b43039bd786c4a40	beta-lactamase_domain_protein
9685938268d2d342d82ef046e83bff26	Betaine-aldehyde_dehydrogenase
39a32052e2323a35af265c1d9078f21b	bifunctional_aldehyde_dehydrogenase-enoyl-CoA_hydratase
a851434d85e8973bb669b0b59ddcc4e8	bifunctional_glutamine-synthetase_adenylyltransferase-deadenyltransferase
1b115937d4d9ce364ba519436d3d03eb	bifunctional_homocysteine_S-methyltransferase-510-methylenetetrahydrofolate_reductase_protein
72a116af44b0c5fb0f5c209ad19bcdae	bifunctional_P-450NADPH-P450_reductase
93e6b1300c942e152d7b527c034c7d14	binding-protein-dependent_transport_systems_inner_membrane_component
0746e239cbb1bd174afc8953f56620ce	BNR_repeat-containing_glycosyl_hydrolase
1f21aa0b38b3d15d21069982c4f32549	branched-chain_alpha-keto_acid_dehydrogenase_E1_component
b9cf519ece6f3cc037516e9e01920d83	branched-chain_amino_acid_aminotransferase
4cf6dd34dfa45df8a86317e535fb2bd0	carbamoyl_phosphate_synthase_large_subunit
4ee46654662d6c438a14d9edefdbe7b4	carbamoyl_phosphate_synthase_large_subunit
55d54f1135a624a9c268557019a2c5d4	carbamoyl_phosphate_synthase_large_subunit
63f79c12ee121f948005db14664007f0	carbamoyl_phosphate_synthase_small_subunit
37f12694094c35aad1b345db108321d9	carbamoyl-phosphate_synthase_large_subunit
54dc6e55d4343922ba2ce77c10095d66	carbamoyl-phosphate_synthase_large_subunit
842b424a3bb6148070ba018f4c585cb4	carbamoyl-phosphate_synthase_large_subunit
38c0815007e1b6be31e66b147a83d1af	carbamoyl-phosphate_synthase_small_subunit
206d6e9b537b13368f3c3483737add5f	carbon-monoxide_dehydrogenase_large_subunit
8a699d4f188a47307770da229e1c9c19	carboxy-terminal_protease
4c9142d9f3cbca66a132ce0756ef2a47	carboxyl_transferase
6f9e63c408ef7ed23addaebcd670255b	carboxyl_transferase
40698c5e1cacf5c734c27c4d93e240c6	catalase
2e832f51a79e6348bda13b1da14bfef3	catalase-peroxidase_HPI
7a1ed12b19e6a420817d83c8ae1453d3	catalase-peroxidase_HPI
a5cf9ac7fd27183c68697cf32e9a8607	catalase-peroxidase_HPI
d2b4146a4273c79f98567a91d7711070	cation_efflux_system_protein
f00524de095dbf55f2c8398ebe991e20	cell_division_FtsK-SpoIIIE
bb33e059a5b3bb5f4ccd51f8bb13a297	cell_division_protein_FtsA
4a91f355d0f78e70b9a8891cf3316483	cell_division_protein_FtsZ
5881e2506e93be7dec54e45917446f6f	cell_division_protein_FtsZ
3df4ee4d56486a3b173c1148c07c3956	cell_shape_determining_protein_MreB-Mrl_family
5a2040f6ed7b0a79a4f0345102672c32	cell_shape_determining_protein_MreB-Mrl_family
8695ef1910d05ca3d4b7d3f61b17a1ef	chaperone_protein_dnak
2bfcd2c6ed97c20e5eca346369382505	chaperonin_GroEL
9ee6ad2975b627b20a3ab972a6393b1d	chaperonin_GroEL
cace6fd0930184271cc23726b9919b8e	CheA_signal_transduction_histidine_kinase
6734a113d2bd444e22c1354b184717b7	choline_dehydrogenase
30382295cf1dd9300fa816873dd612f4	chorismate_mutase
1d24b6ae6285415a4e4a1e576b63143e	chorismate_synthase
d94911d90f5d2abd13e9ea7ab7d89865	chromosome_segregation_protein_SMC
38693088ff9a986a9774e7b9dc26f5e3	circadian_clock_protein_KaiC
b6cb9c22110009dd4fcd3d2d1f69087a	citrate_utilization_protein_B
eae1b74df102452fc0eba22e74e03a7a	CoA-binding_domain_protein
ff2ed1c64c3650a85b28cfb26b304e29	CoA-substrate-specific_enzyme_activase
20c3b35a1ce6b331737c79c6a8148679	cobyrinic_acid_ac-diamide_synthase
74e866e44fc0291e3d0f8b84f5a0623d	Cobyrinic_acid_ac-diamide_synthase
2ed74db37fa66db67e0f1beffc575184	cobyrinic_acid_synthase
ca98e48e8fbc4d20b8de4174d0e3dee9	coenzyme_A_ligase
15f99bf09a3811e62d2b5a67c1d5fdad	conserved_hypothetical_protein
168d7270dd135a907e8e6ce3d2c606b5	crotonyl-CoA_reductase
4a2488c9891500751149b7ea82c959f7	CTP_synthase
b7f16273fd223ea57b1517fdeb341aa3	CTP_synthase
e010e33daa29b1aca0f5627e7912e195	CTP_synthetase
0d9ce2bff2ff83c390c25b95a24b06bd	cyclohexanone_monooxygenase
5ff422508fa5bd7900183baeb0084b31	Cyclohexanone_monooxygenase
1343d45a5fbc5c233ee6a0e20be3f7c2	cysteine_desulfurase_family_protein
7199616c8262e80494cfcd0454571f5e	cysteine_desulfurase_SufS_subfamily
c9298bfd2c970a43b9a7419d89df179c	cysteinyl-tRNA_synthetase
06432a505c86eae7f504bdc1d8c644fd	Cytochrome_b-b6_domain_protein
5914350c08dc0eaf0c29b0ac667a8d7f	cytochrome_c_assembly_protein
19ad5bf32efa1320997fed425acaecd0	cytochrome_C_oxidase_subunit_III
3a9fa34c2943aa6da4e05bf7fbf120c5	cytochrome-c_oxidase
98f30735170af38a468a5d933cc247f4	Cytochrome-c_oxidase
3a85d8a3d95971fdf95436cb6f71961f	DEAD-H_associated_domain_protein
4a7e9b0663c93c1664187d617e169d9d	DEAD-H_associated_domain_protein
7de3165931660d62090868986e07f0a2	dead-h_associated_domain_protein
023f18a3b70c4dc0b5d3dd920e302e3f	dehydrogenase_catalytic_domain-containing_protein
153ddd15cbf2e7ad818af30decd4d035	delta-1-pyrroline-5-carboxylate_dehydrogenase
f2a46c8d920f61a1162cea7bc50c6479	delta-1-pyrroline-5-carboxylate_dehydrogenase
5d60221b6bfb254ea24af3f6327fb4b9	deoxyxylulose-5-phosphate_synthase
fb8c5ac50e2c0364d626e0e4e855b479	diguanylate_cyclase_and_metal_dependent_phosphohydrolase
b1220e7ee4ee271e499bef792276d6ff	diguanylate_cyclase-phosphodiesterase
f04c330c1726c5bfe623e5cc1f61f796	dihydrolipoamide_dehydrogenase
9aeb42171c72f4564ae7b494e0644457	dihydropyrimidinase
5c14817b8b584d62bc64b74ab6087681	dihydroxy-acid_dehydratase
9c3baeb5c8a6cc97fd70323b0b897023	dihydroxy-acid_dehydratase
84d68c09e809d5549f07c67eb8eed7b9	DMSO_reductase_chain_A
8e25b6dcd5e6a9d9ae97edee6057d1f0	DNA_gyrase_a_subunit
d1afcdfb4d1dd7571d1a7955e6faf858	DNA_gyrase_B_subunit
5785a784c1ba4cb85544976c8321d6c3	DNA_gyrase_subunit_A
cdfda88ea9195911aab697c21ddd472e	DNA_gyrase_subunit_A
a01443246c79ee2bc0296b9856e8f72b	DNA_gyrase_subunit_B
1e3f969af28746c3b6355a135170d7c4	DNA_polymerase_III_alpha_subunit
ceb0260a0eae46cfa131a4839f1b30ec	DNA_polymerase_III_alpha_subunit
1d2c6b3f9aa2da42ee639c415d432b72	DNA_polymerase_III_beta_subunit
5ef510cb010a26a3660fcb9ae4481356	DNA_polymerase_III_beta_subunit
1367619a69b2a162ef6fe6e5138cf8d1	DNA_polymerase_III_subunit_alpha
503ff09995a8c7ffa9dcc6f8a7c224fb	DNA_polymerase_III_subunit_alpha
5794e20090a631e7c639bbbd836a2139	DNA_polymerase_III_subunit_alpha
b26094e430fff33664fd03c447fcb0ab	DNA_polymerase_III_subunit_alpha
ece6d3e45f7225ef4f027d7295f68f0f	DNA_polymerase_III_subunit_epsilon
2e22106ecc0c8b4c038f51c00a6f4a58	DNA_primase
2edcbea60b814f91aba9d40fce650766	DNA_primase
88ec5600c8e5e6ee7236a34253660ae5	DNA_repair_protein_RadA
ae0ac1f4410bab0f01e0033457131e4a	DNA_topoisomerase_I
6381e69b6a271a27a537b41ce13a94e3	DNA_topoisomerase_III
14af986cdb1af480195288978ba53bca	DNA_topoisomerase_IV_subunit_A
84f9a92a1a5174b56408758641e40521	DNA_topoisomerase_IV_subunit_A
425a48e67ca2523af7f4c472500fa871	DNA_topoisomerase_IV_subunit_B
ba0237680ed089aeb1b9d2c228969bee	DNA-directed_RNA_polymerase_alpha_subunit
e6954b412d2d5f0296333712998b5c28	DNA-directed_RNA_polymerase_alpha_subunit
1f3122da52d6bc40dcdd925545db989d	DNA-directed_RNA_polymerase_beta_subunit
26d0b8edaeb3442b789381eaeec78522	DNA-directed_RNA_polymerase_beta_subunit
5102319124704de3edd074d8b2c18012	DNA-directed_RNA_polymerase_beta_subunit
746613567b1c58710671e126330500dd	DNA-directed_RNA_polymerase_beta_subunit
899f4fa65c0ca3d4c5a809267049aee4	DNA-directed_RNA_polymerase_beta_subunit
96bc9828ecfead733ae066c86ef8dd08	DNA-directed_RNA_polymerase_beta_subunit
aa8e82d544721ab1129c12226b9e08c0	DNA-directed_RNA_polymerase_beta_subunit
fdd2fdfbc9f5c6724d30f649596a2306	DNA-directed_RNA_polymerase_beta_subunit
0695dfaaf8d824a99d9d8037bde74ab9	DNA-directed_RNA_polymerase_subunit_beta
0914414a6505d66bbc829714ad396f01	DNA-directed_RNA_polymerase_subunit_beta
0c1afa3131109dfe5c92d4b0cb498132	DNA-directed_RNA_polymerase_subunit_beta
2cfd462ecd419a4c7270591f294ff17f	DNA-directed_RNA_polymerase_subunit_beta
6fcd658995990a137f74f655a7010460	DNA-directed_RNA_polymerase_subunit_beta
73f6cdf3695260ab73246bb0f9d91310	DNA-directed_RNA_polymerase_subunit_beta
8cda304078ae2e9dfbacd9da02a71642	DNA-directed_RNA_polymerase_subunit_beta
bccee5c72222718c9b9884c4995e2efa	DNA-directed_RNA_polymerase_subunit_beta
48d238f1bb6a0b163d496dd4652be973	DNA-directed_RNA_polymerase_subunit_beta-prime
3de1507d88485948d778fbb1b9d3b195	DSH_domain-containing_protein
1894ada794ee1aba9e07802c0280b3d9	dTDP-4-dehydrorhamnose_reductase
332fba42ba49403cff446ff89fbb1488	EmrB-QacA_subfamily_drug_resistance_transporter
0d5154aeb563020b36d3793fa6f28107	endopeptidase_LA
3f41fea688ab5642378046a3896c93a6	enoyl-CoA_hydratase
dedf626732902c9b7e335ee9b2012636	enoyl-CoA_hydratase-isomerase
80aac9c7cd31505d07f46adf05ea2a7f	excinuclease_ABC_A_subunit
abd3732be3fd2d180c7ced81a08d603f	excinuclease_ABC_B_subunit
e1401bf19cad411d43ea9dffda69ef46	excinuclease_ABC_B_subunit
4cfb8b779de73c96a9062512bb67f30b	excinuclease_ABC_subunit_A
e02ac2aee3b570960228269e46903e38	excinuclease_ABC_subunit_A
836b263b6af6bb533a21943127c9bcc1	excinuclease_ABC_subunit_C
0d84196a78233f9799662bd3f9d5c559	extracellular_solute-binding_protein_family_5
6c46e6871832a16850311641e8bea459	extradiol_ring-cleavage_dioxygenase_class_III_protein_subunit_B
04282f02e3285885751c2e9716ef51f2	F0F1_ATP_synthase_subunit_beta
234c3e64c215614d2425943bf1117ba5	FAD_dependent_oxidoreductase
38ea719da0aa232ddd3c2d34db96d808	FAD_dependent_oxidoreductase
c61ca7b68aff7708ff07d05b3671d874	FAD_dependent_oxidoreductase
e761b7753607763b698760c176fb0234	FAD_dependent_oxidoreductase
fba71b65a81992fbf3290c87167f178c	FAD_dependent_oxidoreductase
e6503da9c68356cad6af7fac85834f72	fatty_oxidation_complex_subunit_alpha
1dade91981cd90f50f7d3046cd0810be	ferrous_iron_transport_protein_B
f0eb952f66f54c8fd277344e163b92d3	FeS_assembly_protein_SufB
cebd26e76474467c08868a5bd3c3b67b	flagellar_biosynthesis_protein_FlhA
dc62272b7b875340979e06b5a4d04e1e	flavin-containing_monooxygenase
de1dea18993b11b0d12c6d65af0cdc94	flavodoxin-like_protein
03e56a5bf819857b142e14610d6ecbed	formate_acetyltransferase
2cef5c19736392b56e99329badd60bb0	formate_dehydrogenase_gamma_subunit
44a73d95b9d6a8c7f071613554a0d24c	formate_dehydrogenase_subunit_alpha
371c77c73c0ee0495b63287f34bcc61f	fructose-16-bisphosphatase_class_II
c1936343b9ddc7ee424f31f1cbf46160	fructose-16-bisphosphatase_class_II
636a8a842386b889067a20f9ce03afcd	fumarate_hydratase
f404a0f5d34c1575541175ad28185181	fumarate_lyase
974955395e75b424c489bb6234b7e60b	fumarylacetoacetate_FAA_hydrolase
03783373e1a730b10ead79d3f66797e6	GAF_sensor_hybrid_histidine_kinase
141ab788552a99768a6e0d6d3847541b	GAF_sensor_hybrid_histidine_kinase
4f37c20d2940ce5e9e1ab35eba0ebda8	GAF_sensor_hybrid_histidine_kinase
a1bba4607dc159aceaad8a05f5375e6e	GAF_sensor_hybrid_histidine_kinase
dfc79be87d545512d2010847b62f98b4	GAF_sensor_hybrid_histidine_kinase
568ef59f480ecfbf280f948eb1e9d06b	galactonate_dehydratase
4fa7b519009024530081cf433304364d	gamma-glutamyltranspeptidase
c5166b0ad46d07ecda6a542d8f5907e3	gamma-glutamyltranspeptidase
13665aad5618956bb49669558736b48e	GDP-mannose_1-phosphate_guanylyltransferase
0898aaa9c037564d91a2b66e4dafc654	glucosamine-fructose-6-phosphate_aminotransferase_isomerizing
2d592d8d2dcbf9606070c1187de3ed94	glucose-1-phosphate_thymidyltransferase
117d4e4676ba13d810f932995972be91	glucose-methanol-choline_oxidoreductase
e68f991027472489260162061b228cbb	glutamate_decarboxylase
7061c69eb1a038c42e5b47c766a9598d	glutamate_dehydrogenase_NAD
3362e8758aaa72a722ece70b219cedb1	Glutamate_synthase_ferredoxin
5a87fe4f20fce4d936ecf0351163493d	glutamate_synthase_large_subunit
7b6df2fccd856703315b8aecea0105b3	glutamate_synthase_NADH_large_subunit
516900fe665fbf0e168f7c4a0c0b767d	glutamate_synthase_NADPH_small_chain
f4b8506dcfa620fe9bda8c747985bfcb	glutamate-1-semialdehyde_21-aminomutase
f1d9211b6461e594de9744873d7861f9	glutamate-1-semialdehyde-21-aminomutase
889ce6f08716b21856cb4f369f2e9e15	glutamine_synthetase
3b7be2756294e4ebfbd1202db46aec4f	glutamine_synthetase_catalytic_region
3d40447f8e6f061b4cd50ccf39ebf1d8	glutamine_synthetase_type_I
8dc7afaec12f88d1fa16f7cd8d301a3d	glutaminyl-tRNA_synthetase
128449169e785208595ce24a2651362f	glutamyl-tRNA_reductase
c9dc2697e17a24b3cb215fe97fdc09d7	glutamyl-tRNAGln_amidotransferase_A_subunit
7777d08c52210d57fce58d2e84b3c2c5	glutamyl-tRNAGln_amidotransferase_B_subunit
0bdbd381af849599d71951bc17fee3ca	glutamyl-tRNAGln_amidotransferase_subunit_B
e1c1e4816dae119e7b136ba2ecd041b1	glutathione_S-transferase-like_protein
e7b0cf2ae40558da4f60ec01b3d5bbf2	glyceraldehyde-3-phosphate_dehydrogenase
ba3fe60e5d5056638934e1dc29bef4f2	glycerol-1-phosphate_dehydrogenase
53e249d71e6faf1b6870fb3b7d83dc05	Glycine_C-acetyltransferase
50f25fea916978abe34b3c6e836ff34c	glycine_cleavage_system_T_protein_aminomethyltransferase
6ae956ba6bf5f8852b91dae941479bc5	Glycine_dehydrogenase_decarboxylating
16489c88941ce6e7ce09d309a1425cad	glycogen_debranching_enzyme
a23ce93b6fdf5fe265ef4c9a0e59c400	glycoside_hydrolase_family_protein
c6d22006f9bc538fca396845c40c81d6	glycosyl_hydrolase_92
9f55e05a1e39cfa2b7ef8e0258533f42	glycosyl_transferase_group_1
3b264841ee1bf103475ae2e60193bd4f	group_1_glycosyl_transferase
1af51d5b135625a758e84e1d974aa387	group_1_glycosyl_transferase_protein
2b938f9b53ede2f7bc33332ebe2a747a	GTP-binding_protein_LepA
9bda7177a12f104f6f2da60481a794ed	GTP-binding_protein_LepA
a3afb3d333634e0ab5a0da78d73d90ab	GTP-binding_protein_TypA
8c4d94e689f69a0c956a332169f79396	GTP-binding_protein_YchF
4b473154769b0aca4974be31877e0205	GTP-binding_proten_HflX
12d6859eb1d8dc598ba09b1882bd60ce	GTP-binding_tyrosin_phosphorylated_protein
53900acf98ed051dae49078f76908013	guanosine_pentaphosphate_synthetase_I-polyribonucleotide_nucleotidyltransferase
d6a5f6a5506e6f3f06cbb1d96ab0414f	guanosine-35-bisdiphosphate_3-pyrophosphohydrolase
520cce901498269599d19ef995fea005	HAD-superfamily_hydrolase_subfamily_IA_variant_2_HAD-like
32c63a9f156eff649dff4cd38f9a6027	helicase_domain_protein
bff93a879b0b5d266e65e133298c5e3a	histidine_ammonia-lyase
053401b166250ffd7be3f3f036adf05b	HlyD_family_secretion_protein
60c2cfa8313a766b99bfbe781de9b064	homocysteine_S-methyltransferase
25099089371f7bb186cbb8f8d5139917	homospermidine_synthase
0d35f7ee7f10b4be31025539da1193f1	HpcH-HpaI_aldolase
71604b267f77ec10c75c79f2144bcc62	hydantoinase_B-oxoprolinase
47dcdd821aa9b4e1c74ec4518237f606	hydrolase
52ac9d92dced3ec6d808048119d4083c	hydroxypyruvate_reductase
076d8dee2728adc72b0ea75cdb634995	hypothetical_protein
0bd996a7464a69eb80a37e60218d17a1	hypothetical_protein
13059dec6c52e6666c874063a083b49e	hypothetical_protein
15705ecfbef837f7b2a990ca06da1225	hypothetical_protein
159fb4d5f4522a1332ffb923610d7a69	hypothetical_protein
1855b9f8fc904f9dbe5bf132a75c5e92	hypothetical_protein
19b5628a851396aa2c8bee0e904e6286	hypothetical_protein
1b68571376f4da561e413e7a930ce606	hypothetical_protein
2a0161307147dfd6dd842824b7527cc2	hypothetical_protein
2a6da60088049fb952350feaf195bf10	hypothetical_protein
2ab4737ea3ee335c809aef95e0dd14d9	hypothetical_protein
2e25035d2a62a741bffede2b11ffd1ab	hypothetical_protein
2f71a0ee27af25959b77df7a33a5aa30	hypothetical_protein
305d184c576d94c9d40f7ae1b5a3e49b	hypothetical_protein
367b45447f411225ef463b7e36f5193d	hypothetical_protein
36a242cbe027cf3e0d86d662dfacc93b	hypothetical_protein
39abd33b469017d8ffb6fb66cbc2dfc7	hypothetical_protein
3bf80bc0b7a9e0a2e7ef50b97cb66569	hypothetical_protein
3f263e97c17ed5e557ea5f54d1ed6b7c	hypothetical_protein
42148db5be3e132c20dea07502599dc6	hypothetical_protein
4459d4390711e20a2ea790f88253c1be	hypothetical_protein
4e460085e02e8a6f78a0e575cb4ec547	hypothetical_protein
5571a1efadbe5a69f867452367933cfe	hypothetical_protein
562ab717287214bace0538b9698f870d	hypothetical_protein
5bea36588ae409c353d7873956ed125e	hypothetical_protein
61837e1b1ee2cd4221e7532d1fb4a5e8	hypothetical_protein
64b2da82a9e98d0ee41ea197ba05a522	hypothetical_protein
66943ce07e90620a2a6c2530b0faf9df	hypothetical_protein
6705fd3d03daf32bf20bf0d63222a723	hypothetical_protein
71cbe00bd7f56f63799c18ef4083a538	hypothetical_protein
744b72b0343609d3d6f1317118dbc1b2	hypothetical_protein
7bee1a031144254374b9e2959fb7fd73	hypothetical_protein
7c514c8baf999f2a90cd5c41719ae641	hypothetical_protein
7d09228a733ec69eb93b151ea8ac8d7d	hypothetical_protein
825ec4a51e90260563e4786f1850ce66	hypothetical_protein
85d959b02211fb934a7c33dbf4f9bc9f	hypothetical_protein
87c3ebb948b29b8d1e2ac2ca9901a1ec	hypothetical_protein
8bbb453aaa5d98acd5d7c19893930486	hypothetical_protein
9977d2f8852d1a3334bb9e0f4f09375d	hypothetical_protein
a5d9748584e3f11f7025090ebaf93d39	hypothetical_protein
a5f7442705ab8a8c7c3da1173227866c	hypothetical_protein
ac2ddbe70e18e12881784d1465979225	hypothetical_protein
ae2ffdbeebb848a3f789e47f42cfde78	hypothetical_protein
beb927db532a2d7a33b0ae77c59bf653	hypothetical_protein
c362dc73e7092f63f8c372869c360075	hypothetical_protein
c4f5c29c81515374aab15f2bb2295fcf	hypothetical_protein
c6002a01cf7e83065618162b68955411	hypothetical_protein
c90494ee41ced722863e8bb4559d6c53	hypothetical_protein
cd4e0de6d0baa5ed50265a25c5af7116	hypothetical_protein
d4c28aab7bf747d478e513c209e6b906	hypothetical_protein
e33c3304232250bd60d5d8568890657f	hypothetical_protein
e557c298ea018fcfcb37d8aa1cadc1ef	hypothetical_protein
f05f43c2ea88b315a1df719c2ad4772f	hypothetical_protein
f4f492a1fcc5646ad83bc8e53228def0	hypothetical_protein
f9b1220a27ee59ae57c50464bf73a5c1	hypothetical_protein
fa92db7ab602f35ad12426d73009bd53	hypothetical_protein
05256913c347b7e199b0c2851e140999	Indole-3-glycerol-phosphate_synthase
13c2c7639770557ab74f5e7fedfaeeca	indolepyruvate_ferredoxin_oxidoreductase
8319fc7c5fbc380c236ea48960079bb7	indolepyruvate_ferredoxin_oxidoreductase
099bbb1f8018d5cad49826689fe74b9b	Integrase_catalytic_region
02935940ddd93d685fc6f4960571abb9	isocitrate_dehydrogenase
50e88dc45b6419a93cd0afdcdf45e96a	isoleucyl-tRNA_synthetase
8a6fb4a5e67f770e45b556c29a2325fb	L-arabinose_isomerase
8a6e734c8f82a9f5a98ac88cca1ff3b9	L-aspartate_oxidase
105c51b8d6f9667f9057387f8357ebca	L-carnitine_dehydratase-bile_acid-inducible_protein_F
1f0fd03db610711c737b67285ecf4570	leucyl-tRNA_synthetase
d7939e1b389a71b79d77e2b57ba51299	leucyl-tRNA_synthetase
e387de13afea9bb054cbeb593e9028e2	leucyl-tRNA_synthetase
3d81b1c5d679ef766f9137615917d3bf	LexA_repressor
c0809b85d36a8720c0583a74165782e1	lipoyl_synthase
3740a97f5b48e1709c7443d4aa15be2d	lysyl-tRNA_synthetase
78be466a3abf40bdc889f7b0b4f9889f	Lytic_transglycosylase_catalytic
d9c52022d0355f08cab00cd5ba5452f7	major_facilitator_superfamily_transporter
b586be31dfa32eec4ba748d9fb2a9bdd	malate_synthase
1dc8665e74d82f8e1ceb42edb4754cff	malate_synthase_G
7b359d2d3c38563395a28b2b46adf693	membrane-bound_proton-translocating_pyrophosphatase
a7b726ad248509f899df048dfca3338b	metal_dependent_phosphohydrolase
45e8256f779cc529b46ba7a64f10c5e2	metapyrocatechase
732fecf4ad5326078a37f1d752858004	methanol_dehydrogenase_regulator_moxR-like_protein
497f0793919eeb1f795c79c2c529aae6	methionine_synthase
8b40aba57b1ec6c99dd3d37c04fcb705	methionyl-tRNA_synthetase
9150f14e800772ffac20f20e35355405	methionyl-tRNA_synthetase
9fc748628f0023b1fd052f204c198fd9	methionyl-tRNA_synthetase
a7dd18e39a70030386a9f78d089478a9	methylcrotonoyl-CoA_carboxylase
9423def41af34493ba4dc1230907ada2	methylmalonyl-CoA_mutase_large_subunit
c6e7dac453b9cad616d11ebdba131c37	methylmalonyl-CoA_mutase_large_subunit
e8e7020e0c40a86662e01c6115834772	Mg2_transporter_protein_CorA_family_protein
11a4e14c751301bbf545e0545292a7db	moaA-nifB-pqqE_family_protein
90efed48d282826dedcd8945a25b7b02	molybdopterin_dehydrogenase_FAD-binding_protein
114b8de68d67f6a33d445faf58e73f64	molybdopterin_dinucleotide-binding_region
53ec0fd091d2c6cf85c70f8a73d90a3c	molybdopterin_oxidoreductase
578601ed56872958d5f4e5383f38b182	monooxygenase_FAD-binding_protein
e43ca58df6e7fb05751ddbec8b4d680b	multi-sensor_hybrid_histidine_kinase
3a8caf884d3a18d2da1b6c9c77e29074	multidrug_resistance_protein
7a6f2fef446c63339bef40618cc3cd69	Myo-inositol-1-phosphate_synthase
e0c01f4718408f0ebbb434dffd6646ac	myo-inositol-1-phosphate_synthase
689122d906442c56db82843349b3461e	N-acyl-D-amino-acid_deacylase
cac01fd4bc6c4a66141fd2ce18aca059	N-carbamyl-D-amino_acid_amidohydrolase
b42760ddc68ab336fa86b128f95cde7a	Na-H_antiporter_NhaA
f96b1d8d048d1590c2f9c28fec9ffe71	NAD-dependent_epimerase-dehydratase
41a6a567bf5240da9ad4d5037580ee89	nad-glutamate_dehydrogenase
1a385c2254a661fed6c1a307d0fb0931	NADH_dehydrogenase_I_D_subunit
27245b085488ad419249e24301d9166f	NADH_dehydrogenase_I_subunit_D
07041e053e37d3934da26a68cc35959b	NADH_dehydrogenase_quinone
19e6c1cedf76dd6f46854121005fecdc	NADH_oxidoreductase_quinone_F_subunit
7a649498c74a003802129221aabf45fe	NADH-quinone_oxidoreductase_B_subunit
e7537e6331be719dacc4f874b9ec522f	NADH-quinone_oxidoreductase_chain_G
8d945eb6707ce98bd2b6e1400f0b3fd4	NADH-quinone_oxidoreductase_chain_I
24d50ccfa5cfd15b362742a2cb0919b7	NADH-ubiquinone_oxidoreductase_chain_F
29c9c255b1c3a4b1aeb94234bba878a5	NADP_transhydrogenase
35733a3bdf16c027979bca7e1b8c3e8c	NADPH_dehydrogenase
040593c919d31dff427f29e683b30ce0	nicotinate_phosphoribosyltransferase
adeed4539650f9d5f1f8da336d63b59c	Nitrilase-cyanide_hydratase_and_apolipoprotein_N-_acyltransferase
53b6ae0aa8fa32aba37ee98ca47f4a9c	nitrite_and_sulphite_reductase_4Fe-4S_region
60d0c21cbafe42aa3fceabcc3359e927	nitrite_and_sulphite_reductase_4Fe-4S_region
0997ae0b3689cc714b7164d510a54ab0	NusA_antitermination_factor
8562a860e4ad50bd211b20d5687f51d0	NusG_antitermination_factor
e74e8ec8de9db7f686f37e098222fdfa	oligoendopeptidase_pepF-M3_family
7b9b83d145aed9601dd069f219904a9e	oligopeptide_ABC_transporter_periplasmic_oligopeptide-binding_protein
fb575be0fed39053b99c9e92a4fc8173	Orn-DAP-Arg_decarboxylase_2
3d06cdaa72555215619a4d61138ff0bb	Orn-Lys-Arg_decarboxylase_major_region
a6235eeac844ecadf96f273fbce50979	oxaloacetate-decarboxylating_malate_dehydrogenase_NADP_phosphate_acetyltransferase
418d8237c510656c5c696bf5e82f4572	oxidoreductase
ffdf55d24d215fd68d0345da9efbdd1c	oxidoreductase
29eb8c6294d32fb97667bcd376c014cb	Oxidoreductase_FAD-binding_domain-containing_protein
41854c1a3f7ddaae634535ed150e37c5	PAS-PAC_sensor_signal_transduction_histidine_kinase
1bcd62192d3e6cb5c1be460d915f6df6	Patatin
4b2ef6df682c6e02c6ce1456ed36d12a	Patatin
fb97944d7d6a5a6f01847954330ace7d	Peptidase_M1_membrane_alanine_aminopeptidase
3f1b33f82f723a4b07912f666cc41884	peptidase_M16_domain_protein
b8cebbe98023f4dabd68afb4250ab5ad	peptidase_M20
d501563e0fba21c334ca217c43c94db5	peptidase_M20
3177493f9ef13b17e48fedc5f7d01a77	peptidase_M29_aminopeptidase_II
2e5536a2325587357d127d68e3955442	peptidase_M36_fungalysin
7d566517f223c2e3968fc3660cf64897	peptidase_M42_family_protein
5c63f383a1b4a5550e5387244f9dc970	peptidase_s41
25f6b6c76afb18900c955b78dcd7d390	peptide_chain_release_factor_1
7981fc782154961ad27b1ad5adee786a	peptide_deformylase
6e4438e616b05c3dfb89c79718f1379c	peptidyl-dipeptidase_Dcp
0e7b9b30b432b774ef22bcb547a0cdc3	periplasmic_binding_protein-LacI_transcriptional_regulator
4aff3949dc3a76c5931e60fae66b16e3	PfkB_domain_protein
5d3f161584eef5724777da3bcf118e7c	PfkB_domain_protein
12188b5693ef809c7d015aea4d8242d6	phenylacetate-CoA_oxygenase_subunit_PaaA
09d731d876c71be15b6a169a0b7b41a4	phenylalanyl-tRNA_synthetase_alpha_subunit
a0a13ccddb5e0f841e1be1c95ceb4813	phenylalanyl-tRNA_synthetase_alpha_subunit
406aaf133226479a7ce7210e59cfe6b6	phenylalanyl-tRNA_synthetase_subunit_alpha
db9e3c563c4608af07b170b6cbeeb4d0	phenylalanyl-tRNA_synthetase_subunit_beta
668860442439e8c39399870346296719	phoh_family_protein
c440093b277be6baf1778740950cb66c	phospho-N-acetylmuramoyl-pentapeptide-_transferase
f4b2747f6382350579885997d33902ce	phosphoenolpyruvate_carboxykinase
d271d37c75b78361340e81c629e6b7b8	phosphoenolpyruvate_carboxykinase_GTP
7fd9f39a4f87dfce5caa2cd4f6325ba1	Phosphoenolpyruvate_carboxylase
803f01ecb71f55da13656c6d72af57a4	phosphoenolpyruvate_carboxylase
452035490154d6aa5fc5d3ac0c69fd28	phosphoenolpyruvate-protein_phosphotransferase
2992334eacd4979bea29747db864b630	phosphoesterase_PA-phosphatase_related
501af31e360faa5882077124c7fea47b	Phosphoglucosamine_mutase
2ae7b32e0347c675c8f6cb979bde93ba	phospholipid-glycerol_acyltransferase
0ce792e77ff2ba0ffe62b7e1f921d718	Phosphomannomutase
1f837a7d768dedd1acc75bc9bc9a08cb	phosphoribosylformylglycinamidine_synthase_II
80b7e563834c77830ad8ad534777d4b5	phosphoserine_aminotransferase
5a82a2cc619632cea79e65284389c767	PHP_domain_protein
73d3a0570c26b92cf4e6fa7e6f73f050	Pirin_domain-containing_protein
b6bf1b3b7c13cf2c16aec95dde8d41f8	PKD_domain_containing_protein
3dd96e6c56c1e8d63061c21dc86520de	poly-beta-hydroxybutyrate_polymerase
539e11b292d798d92dc44ed3edcb2c98	polynucleotide_phosphorylase-polyadenylase
796c227aeb26e4e70eb47a46b7ee3530	polyribonucleotide_nucleotidyltransferase
ac3ea316938eec355afe594f3cc4238c	polysaccharide_biosynthesis_protein_CapD
be8285d00b41c00a33d20bab2666c680	Polysulphide_reductase_NrfD
c2dc8c73021fc4164e3506320833e457	Polysulphide_reductase_NrfD
05a5067c51681f365c9f82a3089507b7	pppGpp_synthetase_I_SpoT-RelA
2c3378c69a42f524c713f90d61b57ae9	pppGpp_synthetase_I_SpoT-RelA
65dd867751e57ea40bbf6961ab62bf8f	pppGpp_synthetase_I_SpoT-RelA
4a89a43c085b7764537cc76f7981f0b0	preprotein_translocase_SecA_subunit
6e2934ab9f8e73bc658ddaae509d5c15	preprotein_translocase_SecA_subunit
72c8d91a35017b39559e11c4180753c5	preprotein_translocase_SecA_subunit
24dacc0f8bf79b81dfd904ac356fad8a	preprotein_translocase_SecY_subunit
2060dabf6af0217013a5a0568956548b	preprotein_translocase_subunit_SecA
b5110ba6333f3498ddfe29b297ae3dae	preprotein_translocase_subunit_SecY
d52408c063aa72d0c7f2b4aa5f12ce98	Proline_dehydrogenase
a9f000f23edf5831cdccb8ac24cf3ca8	prolyl_oligopeptidase
81e9c195b007277671a09d8b92b765a1	prolyl-tRNA_synthetase
81ed6139db2b6d8a4cf0b9e470ec8e3b	protease_II
95923d005964dc10657147f2d174be20	protein_of_Unknown_Function_DUF1080
7d65f63507f65dfab763f55b226d1f6d	Protein_of_unknown_function_DUF1998
ffaff7bcb6ae99f809c60d5813aea3da	Protein_of_unknown_function_DUF2090
ff8d40f4157f641314fc7c07a2bcfe83	protein_of_unknown_function_DUF255
e5ba6ad749c746a9fd705c90c4c7c458	protein_of_unknown_function_DUF849
102e1edae916f1d1fce0ba51b8b25050	protein-export_membrane_protein_SecD
33da993ec632e99b908813345cd2b583	proton-translocating_NADH-quinone_oxidoreductase_chain_L
ff4c6e6b44e0292be2131eb84b8c6f73	proton-translocating_NADH-quinone_oxidoreductase_chain_L
7ddf498720fadacff1f64a0da7936925	pseudouridine_synthase_RluA_family
b3ff2f0c5386cbfbd6d4c8807654506a	putative_ABC_transport_system_ATP-binding_protein
8c50e224ca432cc9d2fefcfb26c02b6a	putative_ABC_transporter_ATP-binding_protein
4165c0df208daf1ad3bed24ec1faaf6c	putative_aldehyde_dehydrogenase
a39ffdf598ab20c3ce0f5ca10f1474a0	putative_aldehyde_dehydrogenase_protein
50777e9f1a9b2cabccd9750b585bdf60	putative_aminotransferase
67df3dd7339bd1d7fcd3545b5f3d50e7	putative_beta-lactamase
110acef9f59b8ef92f72122480f7b94b	putative_cytochrome_P450
69d75455a94b42fe19d20b4e846dcbf0	putative_D-galactarate_dehydratase-Altronate_hydrolase
0d000642f8d08a5628eea75ca680e7af	putative_dimethyl_sulfoxide_reductaseDMSO_reductase
3d143c58ed3b2ac8eb19bd1062e93f29	putative_dioxygenase
43b41bda8bc30dd6496deefd0a498a8e	putative_dioxygenase
322d4aec261a2c9e0aff054046955f83	putative_esterase
408cc7b49e9585f0ab24cb51a97523e1	putative_FAD-binding_dehydrogenase
d674ed0ee15f00f1905ae8a31501b0cd	putative_fatty-acid--CoA_ligase
b20e7386cc005b6e74ef553ecd6444c2	putative_glucose_dehydrogenase_acceptor
9aa7c675ee83985db04c4cdea5d29fbf	putative_glutaminase
5a753b958b2edcaa084c093aac6b6011	putative_luciferase-like_monooxygenase
0b508e22f46daafa9ce399272676c647	putative_monooxygenase
0e2cf6b0d2cf11298fd9eec04a47f7c0	putative_oxalyl-CoA_decarboxylase
8f5cc024e0b2048993e29609e7ccecdb	putative_oxalyl-CoA_decarboxylase
3ae39e937dd14667db9fcc08bbca3b0d	putative_PAS-PAC_sensor_protein
2499ff01dcd3be8c4e46778f79f06ba1	putative_phosphonate_monoester_hydrolase
a8f99f0467da19fed4e08efa2c4f7073	putative_quinone_oxidoreductase
64cd930ccb222162b92847f260e722a1	putative_RND_efflux_system_multidrug_resistance_protein
89fbc6167989fa8d8c393c69c90a71d4	putative_sugar_ABC_transporter_permease_protein
ab41afb15b80708aa076a6b767fc3bb8	putative_sugar_ABC_transporter_permease_protein_putative_glycerol_3-phosphate_transport_protein_ugpA-like_protein
0a5a4d6034f60f94435d80dff726f1bd	putative_transcriptional_regulator_AsnC_family
a51b8d04d2b594dbb78d1d4218693e51	putative_transcriptional_regulator_GntR_family
36eb1fc6907c22de1db50cd1e7bd5055	putative_transcriptional_regulator_PucR_family
bf5ddbfba050343a119955c348de1c14	putative_transposase_protein
c3f7ebd25f309496f5a4822cf3fb5ec4	pyridoxal-dependent_decarboxylase
8712130214f76ff12fa396aa1045f700	pyridoxal-phosphate_dependent_TrpB-like_enzyme
8a354281249f2b9dab28d2ccc426f6ac	pyridoxal-phosphate_dependent_TrpB-like_enzyme
fa001d322432dc34140eb025960af554	pyruvate_flavodoxin-ferredoxin_oxidoreductase_domain_protein
d1ccf238b2a098f5c81200bf9c5c660c	Quinolinate_phosphoribosyl_transferase
464c367a26e725913f3219756ed65714	radical_sam_domain_protein
bc7661284afe8282bc3352769fa84de1	radical_SAM_domain_protein
25da211a6c00c9fd82cab35e3402191c	radical_SAM_enzyme_Cfr_family
3b1efb90cd205eb67f0fb3a29f3a79e1	radical_SAM_enzyme_Cfr_family
9600b78d6cfdce84f7b691aaafb222a2	recA_protein
bfb84279c0649c640a89e42071d6e5f0	respiratory-chain_NADH_dehydrogenase_domain_51_kDa_subunit
088c3adc1cbf57c1951c7b1858827454	ribonuclease_Rne-Rng_family
89c0d834c77e8eee68aeefbc22a2394d	ribonuclease_Rne-Rng_family
5362d99cf8aec4daab3b764c3cea1c30	ribonucleoside-diphosphate_reductase_adenosylcobalamin-dependent
672e10730346ddde767a5ffc04e4e79a	ribonucleoside-diphosphate_reductase_adenosylcobalamin-dependent
1232b27dec1a36730b0278818f5b801c	ribonucleoside-diphosphate_reductase_class_II
1e1bdfbcb94562973456d2bcfaad8818	ribose-phosphate_pyrophosphokinase
566358e45fc569e297ee859459f37802	ribosomal_5S_rRNA_E-loop_binding_protein_Ctc-L25-TL5
a370e1aa266cb564701528b8cec18717	ribosomal_protein_L14
ebc617ce10e7c6c2f44ccb85d1f0ad75	ribosomal_protein_L4-L1e
7d264141b2a3b48ff10b00b38814a5a8	ribosomal_protein_L9
75cdf9a7347b3d67b80ef3fcd97e85a5	ribosomal_protein_S1
be5b63a9c418228c434f5956a51f408e	ribosomal_protein_S10
858d87827fd4b1bf275927f93e0d7271	ribosomal_protein_S2
0f4940e359d358f5ab158b60d9ea88c0	ribosomal_protein_s3
e03cce27b9a46068cbb9ceb7cb0ad5b7	ribosomal_protein_S4
199993e02230f22113e4acc924c7bbb4	ribosomal_protein_S5
39e354a3175ebd788aa2bdd2524d5816	ribosomal_protein_S5
33f610a1c75c8a2cef93131b8044da7d	RNA_binding_S1_domain_protein
182b2601c4f432d6066c64741e331335	RNA_polymerase_sigma_70_subunit_RpoD_subfamily
5863ff51d4ec62ab5ce57ecb8482db0f	RNA_polymerase_sigma_70_subunit_RpoD_subfamily
8e46cf9a157ff5796b11e1e9d010bd83	RNA_polymerase_sigma-24_subunit_ECF_subfamily
8f8e0dff27f1d7141a39e6a73b55ceff	RND_efflux_transporter
cb7e38e3e1ed09c1640751dac372a121	RND_family_efflux_transporter
72aa9167bdc49080b9af3018874eaa4d	rod_shape-determining_protein_MreB
8f55a1ca89cc5e1116c7dab8f8ccd9fd	rod_shape-determining_protein_MreB
99cd05e3b97b075c9ee06c30c868b499	S-adenosylmethionine_synthetase
24ce28a3bc520326f3c64301ee588813	sensory_histidine_kinase
fdb3544ac67f1834d762705bb481859c	serine-threonine_protein_kinase
f671333ca31c5319da05081f0a81c874	serine-threonine_protein_kinase_with_PASTA_sensors
7340b5a3126702419ca86c7000fac512	sigma-54_dependent_DNA-binding_response_regulator
17f592fd29210612ca0fd7b8cfbf73ad	sigma54_specific_transcriptional_regulator_Fis_family
34d6eb1a4d3034ca3d22d713b25fa710	signal_recognition_particle_protein
d47775de4578f78ddf363fec04d72fd4	signal_recognition_particle_protein
cfaf6c460fc42c0c907981857ed25eea	signal_transduction_histidine_kinase_with_CheB_and_CheR_activity
7581940c8fee38f10a66ff3354cedc40	SMC_domain-containing_protein
413d33e88bc23caa3ff0d0c10746544d	sodium-hydrogen_exchanger
b6c57e2db9c63bda51a723362c225510	SSS_sodium_solute_transporter_superfamily_protein
437114697a878e23a6873aa98de17924	substrate-binding_protein
719290ca36250e1e3679f749741ee9d5	Succinate_dehydrogenase
e293068d6aa8487b44e25137ef3124d8	succinate_dehydrogenase_and_fumarate_reductase_iron-sulfur_protein
8a8972329e94303ddcd8e22da4f0e67a	succinate_dehydrogenase_flavoprotein_subunit
44675f18f1ba4bd6b875cdf6bb5fd1c9	succinate_dehydrogenase_or_fumarate_reductase_flavoprotein_subunit
c36377d4508d67689e9962ea00cd69f7	sulfatase
c075bb3cea0a4d6b8fa8530bd754b0df	sulfate_adenylyltransferase_small_subunit
4e8879e2082c8c823ca2c68a1c72acee	tetracycline_resistance_protein
9687a9bd702fc4be3c3f78e62b96e93b	thiamine_pyrophosphate_protein_domain-containing_protein_TPP-binding_protein
9e50596612b03b36bb3dbc80febc5c8a	thiamine_pyrophosphate_protein_TPP_binding_domain_protein
4242d7ca101d69a4c92f90bcfc1e93b8	thiosulfate_sulfurtransferase
2c3eee2d34a601e556b333cc0f3bac27	threonine_dehydratase
75d45ea14defcd73715415c79e73d5f1	threonyl-tRNA_synthetase
832909fad482ba780960332ac93809af	threonyl-tRNA_synthetase
00b36fa68c70e1e51b74baa787032abe	thymidylate_synthase_complementing_protein_ThyX
48bc31db28148cc2501ca08cdd18c8ed	TonB-dependent_receptor
9f482151130e84681a940412cdf70e98	TonB-dependent_receptor
dcbcb1b636c4adbcecc640a21427cf9c	TonB-dependent_receptor_plug
f282d6151f1368badb1d0a2c30b55ee7	TonB-dependent_receptor_plug
4939af2273a96ebb748a0aa0b84d95c9	TPR_repeat-containing_protein
8aa55943ca544c469b379076c2c70a95	transcription_elongation_factor_NusA
40aa3d7bd4c2cb1c9a9b77f531480ad6	transcription_termination_factor_rho
119a9eb724c635724023a41414775899	transcription-repair_coupling_factor
13eb495bd581749fefb7f364d5f6a8f1	transcription-repair_coupling_factor
1bf81d32a53b00f66f3066d6d2583f0d	transcription-repair_coupling_factor
4303106cb82ed92e46e571435b2e6e75	transcription-repair_coupling_factor
6b780f579eadfda2011f3720e79656d1	transcription-repair_coupling_factor
d75f43bedaaa5b11935512e073640506	transcription-repair_coupling_factor
86a5852b9232cddffcb74ef028cb3cf7	transcriptional_regulator_Crp-Fnr_family
9d1dee73c8ca56c0b218a3ddf64d5536	transcriptional_regulator_protein-like_protein
4a03c34c9c076b07a0b7f9b020c0bcd1	transketolase_central_region
9ee416f0212941ba67a4a0650b5b76df	Transketolase_domain_protein
2fc10cf60d298a24f01d10edb6035056	transketolase_domain-containing_protein
4523e305cf38092e613c5eb5b3d5ae2f	translation_elongation_factor_2_EF-2-EF-G
5db73bfb86e392d7ee0fa34e89da9e8f	translation_elongation_factor_G
815ebf707633fb48fdbe5552bcfbd368	translation_elongation_factor_G
8503a00579bccad7e5dd8374ecd94cd2	translation_elongation_factor_G
f8e040393cdc71eecd50e1b0bca9160c	translation_elongation_factor_G
b809a16ddc4e5ee1a21704eb5855da91	translation_elongation_factor_G_FusA
1bdb04bac1c794746443bb1b7148b48c	translation_elongation_factor_Tu
997e6fdb045db897bdd010d622291ba9	translation_elongation_factor_Tu
1ccf844d3265c17d49a00c544d2f1112	translation_initiation_factor_IF-2
c0eef372d20b6156b9ef3836de7d6d86	translation_initiation_factor_IF-2
caba93cd27e6d9643614930cbc6f56f4	transposase_IS4_family
be0c073a18517ba68a5c5fa46bc6b356	trigger_factor
963b2d32848ee0801f78916e93bbd9e6	TrkA-N_domain-containing_protein
17c8944f0a2f075b99a03bc91f43878b	tRNA_uridine_5-carboxymethylaminomethyl_modification_enzyme_GidA
bc5475fa276ccfccba70361ed5900ee2	tryptophan_halogenase_protein
7ec7fd6d08581a2e3cc815b1c31abec7	twin-arginine_translocation_pathway_signal
92c6e1b135d366feb403e329cb1d5a70	twin-arginine_translocation_pathway_signal
b79080fa60e47eec8f7ef925cb49ca9d	two_component_transcriptional_regulator_winged_helix_family
150be8c532931b63b36410b9a8b94e80	two-component_hybrid_sensor_and_regulator
7027633b23482fc885ac959f20a2bf0b	two-component_hybrid_sensor_and_regulator
a1177d49e73754c5c4a2255f0d5c0216	two-component_hybrid_sensor_and_regulator
a50a6c77a663c7b112baf53043f2ec91	two-component_hybrid_sensor_and_regulator
ecdaf7d5bbeb6d972277635548172384	two-component_hybrid_sensor_and_regulator
11abeee20a6aa61b92eefa47c6ce502a	type_4_fimbrial_biogenesis_protein_PilQ
a07125d1f9bf45f7512a6043ada787a0	type_III_restriction_protein_res_subunit
87f97c9829aa4cc62da792ef06d80cb9	tyrosine_recombinase_XerD
2e0c79379f515bd85e22be662d085600	UBA-THIF-type_NAD-FAD_binding_protein
98cf6822dd1761f2a04091b5445cc503	UDP-galactopyranose_mutase
e8f18a1f31e1d962eaca4f772ac8149a	UDP-glucose_4-epimerase
7b811799f7026e14324450cf086be309	UDP-N-acetylglucosamine1-_carboxyvinyltransferase
8ab4a99864ea2606d59e49498c449fea	UDP-N-acetylmuramoylalanyl-D-glutamate--2_6-diaminopimelate_ligase
1ab30e8e347aa78a2b5e38350314a8cc	urease_subunit_alpha
75b2bdb7c68bf22eddef6378f33e8f30	uroporphyrinogen_III_synthase_HEM4
5f6ebf82f5921838e1ca5c9ab297b7b8	UspA_domain_protein
849a117f36e933ce55b590301d59b7f0	UvrD-REP_helicase
cb44b1c2a62917d54ac7ec5637bc4df5	UvrD-REP_helicase
a3e89e4db9f5081fd5a7798cb6c4611c	valyl-tRNA_synthetase
59f9dd2b8c897b476397d704e9e2d3e6	von_Willebrand_factor_type_A
062451e23e45f82e2836bb9278ec7d1b	xanthine_dehydrogenase_molybdenum_binding_subunit_apoprotein
0bb512d8668db9a9ee2e1392ceb86296	xanthine_dehydrogenase_molybdenum_binding_subunit_apoprotein
f66187c50562a723cd0c9a7ab1d4611c	Xylose_isomerase_domain-containing_protein
